# Supplementary material for: Deuteration of Pd-activated C(sp2)–H bonds in the solid state
Source: Royal Society of Chemistry journal article supplement (doi:10.1039/d3qi00932g), 2023-01-01
Supplement: d3qi00932g2.pdf [file d3qi00932g2.pdf]

**Electronic Supplementary Information**  
**(Part 2: Optimized geometries)**  
**for:**

**Deuteration of Pd-activated C(*sp*<sup>2</sup>)–H bonds in the Solid State**

Alen Bjelopetrović,<sup>a,‡</sup> Dajana Barišić,<sup>a,b,‡</sup> Marina Juribašić Kulcsár,<sup>a,\*</sup> Ivan Halasz,<sup>a</sup>  
Manda Ćurić,<sup>a</sup> and Stipe Lukin<sup>a,\*</sup>

<sup>a</sup>Ruđer Bošković Institute, Division of Physical Chemistry, Bijenička 54, HR-10000 Zagreb, Croatia

<sup>b</sup>Selvita Ltd, Prilaz Baruna Filipovića 29, HR-10000 Zagreb, Croatia

**Table of contents:**

|                                             |     |
|---------------------------------------------|-----|
| Small molecules .....                       | 2   |
| Precursor complexes and their isomers ..... | 7   |
| Structures from Table S3 .....              | 19  |
| Structures from Table S4 .....              | 45  |
| Structures from Table S5 .....              | 51  |
| Structures from Table S7 .....              | 72  |
| Structures from Table S8 .....              | 94  |
| Structures from Table S9 .....              | 106 |
| Structures from Table S10 .....             | 148 |

## Small molecules

DCI

---

| Center Number | Atomic Number | Atomic Type | Coordinates (Angstroms) |          |           |
|---------------|---------------|-------------|-------------------------|----------|-----------|
|               |               |             | X                       | Y        | Z         |
| 1             | 17            | 0           | 0.000000                | 0.000000 | 0.071482  |
| 2             | 1             | 0           | 0.000000                | 0.000000 | -1.215200 |

HF=-460.8338531\ZeroPoint=0.004796\Thermal=0.0071569

### AcOD

---

| Center Number | Atomic Number | Atomic Type | Coordinates (Angstroms) |           |           |
|---------------|---------------|-------------|-------------------------|-----------|-----------|
|               |               |             | X                       | Y         | Z         |
| 1             | 6             | 0           | 0.090121                | 0.129012  | 0.000000  |
| 2             | 8             | 0           | 0.627934                | 1.207124  | 0.000000  |
| 3             | 8             | 0           | 0.789676                | -1.036104 | 0.000000  |
| 4             | 1             | 0           | 1.731245                | -0.807268 | 0.000000  |
| 5             | 6             | 0           | -1.392696               | -0.123679 | 0.000000  |
| 6             | 1             | 0           | -1.666523               | -0.709147 | -0.880628 |
| 7             | 1             | 0           | -1.666526               | -0.709131 | 0.880638  |
| 8             | 1             | 0           | -1.923619               | 0.825383  | -0.000010 |

HF=-229.1677267\ZeroPoint=0.0580925\Thermal=0.0628231

### DMF

---

| Center Number | Atomic Number | Atomic Type | Coordinates (Angstroms) |           |           |
|---------------|---------------|-------------|-------------------------|-----------|-----------|
|               |               |             | X                       | Y         | Z         |
| 1             | 6             | 0           | -0.869154               | -0.644204 | -0.000103 |
| 2             | 8             | 0           | -1.953477               | -0.091650 | 0.000193  |
| 3             | 7             | 0           | 0.342710                | -0.021341 | -0.000570 |
| 4             | 1             | 0           | -0.768700               | -1.745639 | -0.000155 |
| 5             | 6             | 0           | 1.588230                | -0.766462 | 0.000187  |
| 6             | 1             | 0           | 2.183572                | -0.529168 | 0.888850  |
| 7             | 1             | 0           | 1.380068                | -1.837728 | 0.000063  |
| 8             | 1             | 0           | 2.184620                | -0.529184 | -0.887761 |
| 9             | 6             | 0           | 0.430426                | 1.430717  | 0.000052  |
| 10            | 1             | 0           | 0.964699                | 1.780999  | 0.889673  |
| 11            | 1             | 0           | 0.965174                | 1.781727  | -0.888981 |
| 12            | 1             | 0           | -0.577598               | 1.841275  | -0.000055 |

HF=-248.59639\ZeroPoint=0.101794\Thermal=0.1079407

### DMF-DCI

---

| Center Number | Atomic Number | Atomic Type | Coordinates (Angstroms) |           |           |
|---------------|---------------|-------------|-------------------------|-----------|-----------|
|               |               |             | X                       | Y         | Z         |
| 1             | 6             | 0           | -0.353994               | 0.135031  | -0.000372 |
| 2             | 8             | 0           | 0.373382                | -0.857765 | -0.000289 |
| 3             | 7             | 0           | -1.699346               | 0.107534  | -0.000009 |
| 4             | 1             | 0           | 0.066512                | 1.152857  | -0.000546 |

|    |    |   |           |           |           |
|----|----|---|-----------|-----------|-----------|
| 5  | 6  | 0 | -2.489479 | 1.329787  | 0.000098  |
| 6  | 1  | 0 | -1.831408 | 2.199368  | -0.000541 |
| 7  | 1  | 0 | -3.127107 | 1.372741  | -0.888281 |
| 8  | 1  | 0 | -3.126157 | 1.373299  | 0.889139  |
| 9  | 6  | 0 | -2.423534 | -1.158282 | 0.000387  |
| 10 | 1  | 0 | -1.706015 | -1.975846 | 0.000460  |
| 11 | 1  | 0 | -3.056395 | -1.228107 | 0.890129  |
| 12 | 1  | 0 | -3.056653 | -1.228497 | -0.889139 |
| 13 | 1  | 0 | 1.995418  | -0.398771 | -0.000007 |
| 14 | 17 | 0 | 3.197189  | 0.176654  | 0.000029  |

HF=-709.4467082\ZeroPoint=0.10897\Thermal=0.1178476

### Cys<sup>4D</sup>

---

| Center Number | Atomic Number | Atomic Type | Coordinates (Angstroms) |           |           |
|---------------|---------------|-------------|-------------------------|-----------|-----------|
|               |               |             | X                       | Y         | Z         |
| 1             | 16            | 0           | 2.528015                | -0.336700 | 0.008567  |
| 2             | 6             | 0           | 0.772420                | -0.513519 | 0.511408  |
| 3             | 1             | 0           | 0.552331                | -1.580206 | 0.460242  |
| 4             | 1             | 0           | 0.650697                | -0.187532 | 1.547710  |
| 5             | 6             | 0           | -0.196059               | 0.274165  | -0.395405 |
| 6             | 1             | 0           | -0.026187               | -0.043828 | -1.426980 |
| 7             | 7             | 0           | 0.052893                | 1.702765  | -0.288631 |
| 8             | 1             | 0           | -0.367197               | 2.068438  | 0.561579  |
| 9             | 6             | 0           | -1.627113               | -0.116052 | -0.012770 |
| 10            | 8             | 0           | -1.938006               | -1.360292 | -0.445375 |
| 11            | 8             | 0           | -2.388169               | 0.571785  | 0.619545  |
| 12            | 1             | 0           | -0.364679               | 2.205479  | -1.063442 |
| 13            | 1             | 0           | -2.836932               | -1.564054 | -0.144679 |
| 14            | 1             | 0           | 2.487395                | 1.010048  | -0.063840 |

HF=-722.0802521\ZeroPoint=0.0951069\Thermal=0.1040125

### Cys<sup>4D</sup>-DCI

---

| Center Number | Atomic Number | Atomic Type | Coordinates (Angstroms) |           |           |
|---------------|---------------|-------------|-------------------------|-----------|-----------|
|               |               |             | X                       | Y         | Z         |
| 1             | 16            | 0           | 0.270414                | 1.937516  | -0.538749 |
| 2             | 6             | 0           | -0.035836               | 0.830363  | 0.897616  |
| 3             | 1             | 0           | 0.900241                | 0.720089  | 1.442251  |
| 4             | 1             | 0           | -0.770025               | 1.315012  | 1.538531  |
| 5             | 6             | 0           | -0.560414               | -0.566180 | 0.509326  |
| 6             | 1             | 0           | -0.533498               | -1.191314 | 1.407557  |
| 7             | 7             | 0           | 0.311319                | -1.198050 | -0.506508 |
| 8             | 1             | 0           | 1.472820                | -1.051093 | -0.213092 |
| 9             | 6             | 0           | -1.997839               | -0.558992 | -0.002204 |
| 10            | 8             | 0           | -2.828212               | 0.026613  | 0.877253  |
| 11            | 8             | 0           | -2.344641               | -1.034652 | -1.052283 |
| 12            | 1             | 0           | 0.174514                | -0.734485 | -1.406904 |
| 13            | 1             | 0           | -3.725677               | 0.004145  | 0.510566  |
| 14            | 1             | 0           | 0.088279                | -2.182957 | -0.634105 |
| 15            | 1             | 0           | 1.548834                | 1.530528  | -0.721941 |

16 17 0 3.016825 -0.658275 0.189088  
 -----  
 HF=-1182.9346793\ZeroPoint=0.1034239\Thermal=0.1141045

**Ala<sup>3D</sup>**

| Center Number | Atomic Number | Atomic Type | Coordinates (Angstroms) |           |           |
|---------------|---------------|-------------|-------------------------|-----------|-----------|
|               |               |             | X                       | Y         | Z         |
| 1             | 6             | 0           | 1.186639                | 1.280327  | -0.484021 |
| 2             | 1             | 0           | 2.202799                | 1.534071  | -0.179328 |
| 3             | 1             | 0           | 0.551993                | 2.163868  | -0.399970 |
| 4             | 6             | 0           | 0.666112                | 0.136506  | 0.401106  |
| 5             | 1             | 0           | 0.644859                | 0.484020  | 1.438792  |
| 6             | 7             | 0           | 1.555091                | -1.011854 | 0.316214  |
| 7             | 1             | 0           | 1.533362                | -1.399353 | -0.623000 |
| 8             | 6             | 0           | -0.779153               | -0.178995 | 0.006955  |
| 9             | 8             | 0           | -1.634696               | 0.788453  | 0.421227  |
| 10            | 8             | 0           | -1.139633               | -1.149382 | -0.610690 |
| 11            | 1             | 0           | 1.246751                | -1.753431 | 0.936953  |
| 12            | 1             | 0           | -2.522522               | 0.545928  | 0.117236  |
| 13            | 1             | 0           | 1.210169                | 0.968275  | -1.532715 |

-----  
 HF=-323.8646026\ZeroPoint=0.0975554\Thermal=0.1048899

**Ala<sup>3D</sup>-DCI**

| Center Number | Atomic Number | Atomic Type | Coordinates (Angstroms) |           |           |
|---------------|---------------|-------------|-------------------------|-----------|-----------|
|               |               |             | X                       | Y         | Z         |
| 1             | 6             | 0           | 0.199634                | 1.400766  | 0.765979  |
| 2             | 1             | 0           | -0.855537               | 1.674701  | 0.730140  |
| 3             | 1             | 0           | 0.800688                | 2.245932  | 0.431150  |
| 4             | 6             | 0           | 0.442338                | 0.180660  | -0.132476 |
| 5             | 1             | 0           | 0.175232                | 0.444549  | -1.160774 |
| 6             | 7             | 0           | -0.416943               | -0.934668 | 0.281331  |
| 7             | 1             | 0           | -1.945283               | -0.495959 | 0.034158  |
| 8             | 6             | 0           | 1.916727                | -0.213165 | -0.133176 |
| 9             | 8             | 0           | 2.685242                | 0.748919  | -0.686446 |
| 10            | 8             | 0           | 2.355623                | -1.247238 | 0.303530  |
| 11            | 1             | 0           | -0.242614               | -1.173607 | 1.255075  |
| 12            | 1             | 0           | 3.607448                | 0.452011  | -0.652905 |
| 13            | 1             | 0           | -0.210043               | -1.771999 | -0.257728 |
| 14            | 17            | 0           | -3.209317               | -0.013511 | -0.240557 |
| 15            | 1             | 0           | 0.467984                | 1.173724  | 1.802399  |

-----  
 HF=-784.7184437\ZeroPoint=0.1047582\Thermal=0.1144816

**1<sup>D</sup>**

| Center Number | Atomic Number | Atomic Type | Coordinates (Angstroms) |           |           |
|---------------|---------------|-------------|-------------------------|-----------|-----------|
|               |               |             | X                       | Y         | Z         |
| 1             | 6             | 0           | -4.011130               | -1.094278 | -0.000380 |
| 2             | 6             | 0           | -2.631745               | -1.284117 | -0.000516 |
| 3             | 6             | 0           | -1.770062               | -0.182002 | -0.000106 |
| 4             | 6             | 0           | -2.297035               | 1.119502  | 0.000379  |
| 5             | 6             | 0           | -3.673136               | 1.300518  | 0.000480  |

|    |   |   |           |           |           |
|----|---|---|-----------|-----------|-----------|
| 6  | 6 | 0 | -4.534113 | 0.197515  | 0.000121  |
| 7  | 1 | 0 | -4.675229 | -1.950933 | -0.000664 |
| 8  | 1 | 0 | -2.199332 | -2.277802 | -0.000940 |
| 9  | 1 | 0 | -1.618656 | 1.962435  | 0.000665  |
| 10 | 1 | 0 | -4.083272 | 2.304336  | 0.000835  |
| 11 | 1 | 0 | -5.607663 | 0.349016  | 0.000213  |
| 12 | 7 | 0 | -0.386062 | -0.492685 | -0.000292 |
| 13 | 7 | 0 | 0.386071  | 0.492721  | 0.000093  |
| 14 | 6 | 0 | 1.770065  | 0.182021  | 0.000046  |
| 15 | 6 | 0 | 2.297015  | -1.119491 | 0.000537  |
| 16 | 6 | 0 | 2.631766  | 1.284122  | -0.000398 |
| 17 | 6 | 0 | 3.673113  | -1.300534 | 0.000513  |
| 18 | 1 | 0 | 1.618620  | -1.962412 | 0.000944  |
| 19 | 6 | 0 | 4.011146  | 1.094257  | -0.000485 |
| 20 | 1 | 0 | 2.199373  | 2.277817  | -0.000692 |
| 21 | 6 | 0 | 4.534108  | -0.197545 | -0.000022 |
| 22 | 1 | 0 | 4.083230  | -2.304359 | 0.000938  |
| 23 | 1 | 0 | 4.675260  | 1.950900  | -0.000880 |
| 24 | 1 | 0 | 5.607655  | -0.349063 | -0.000041 |

-----  
 HF=-572.9235904\ZeroPoint=0.1865494\Thermal=0.1976101

**1<sup>2D</sup>**

| Center Number | Atomic Number | Atomic Type | Coordinates (Angstroms) |           |           |
|---------------|---------------|-------------|-------------------------|-----------|-----------|
|               |               |             | X                       | Y         | Z         |
| 1             | 6             | 0           | 4.011130                | 1.094278  | -0.000380 |
| 2             | 6             | 0           | 2.631745                | 1.284117  | -0.000516 |
| 3             | 6             | 0           | 1.770062                | 0.182002  | -0.000106 |
| 4             | 6             | 0           | 2.297035                | -1.119502 | 0.000379  |
| 5             | 6             | 0           | 3.673136                | -1.300518 | 0.000480  |
| 6             | 6             | 0           | 4.534113                | -0.197515 | 0.000121  |
| 7             | 1             | 0           | 4.675229                | 1.950933  | -0.000664 |
| 8             | 1             | 0           | 2.199332                | 2.277802  | -0.000940 |
| 9             | 1             | 0           | 1.618656                | -1.962435 | 0.000665  |
| 10            | 1             | 0           | 4.083272                | -2.304336 | 0.000835  |
| 11            | 1             | 0           | 5.607663                | -0.349016 | 0.000213  |
| 12            | 7             | 0           | 0.386062                | 0.492685  | -0.000292 |
| 13            | 7             | 0           | -0.386071               | -0.492721 | 0.000093  |
| 14            | 6             | 0           | -1.770065               | -0.182021 | 0.000046  |
| 15            | 6             | 0           | -2.297015               | 1.119491  | 0.000537  |
| 16            | 6             | 0           | -2.631766               | -1.284122 | -0.000398 |
| 17            | 6             | 0           | -3.673113               | 1.300534  | 0.000513  |
| 18            | 1             | 0           | -1.618620               | 1.962412  | 0.000944  |
| 19            | 6             | 0           | -4.011146               | -1.094257 | -0.000485 |
| 20            | 1             | 0           | -2.199373               | -2.277817 | -0.000692 |
| 21            | 6             | 0           | -4.534108               | 0.197545  | -0.000022 |
| 22            | 1             | 0           | -4.083230               | 2.304359  | 0.000938  |
| 23            | 1             | 0           | -4.675260               | -1.950900 | -0.000880 |
| 24            | 1             | 0           | -5.607655               | 0.349063  | -0.000041 |

-----  
 HF=-572.9235904\ZeroPoint=0.1832711\Thermal=0.1944739

**Trans-Pd(Cys<sup>3D</sup>)<sub>2</sub>**

| Center Number | Atomic Number | Atomic Type | Coordinates (Angstroms) |   |   |
|---------------|---------------|-------------|-------------------------|---|---|
|               |               |             | X                       | Y | Z |

| Center Number | Atomic Number | Atomic Type | Coordinates (Angstroms) |           |           |
|---------------|---------------|-------------|-------------------------|-----------|-----------|
|               |               |             | X                       | Y         | Z         |
| 1             | 46            | 0           | 0.000004                | 0.000004  | -0.439727 |
| 2             | 16            | 0           | 1.592048                | 1.750296  | -0.468119 |
| 3             | 6             | 0           | 2.946108                | 0.684622  | -1.119354 |
| 4             | 1             | 0           | 2.811381                | 0.499041  | -2.188490 |
| 5             | 1             | 0           | 3.899734                | 1.194377  | -0.978101 |
| 6             | 6             | 0           | 2.964081                | -0.651842 | -0.383415 |
| 7             | 1             | 0           | 3.736200                | -1.307670 | -0.812357 |
| 8             | 7             | 0           | 1.631393                | -1.315953 | -0.485957 |
| 9             | 1             | 0           | 1.524025                | -1.975502 | 0.285298  |
| 10            | 6             | 0           | 3.305822                | -0.535539 | 1.099115  |
| 11            | 8             | 0           | 4.368940                | 0.259592  | 1.304950  |
| 12            | 8             | 0           | 2.742297                | -1.145752 | 1.972253  |
| 13            | 1             | 0           | 1.556693                | -1.836733 | -1.355814 |
| 14            | 1             | 0           | 4.534192                | 0.289699  | 2.259238  |
| 15            | 7             | 0           | -1.631382               | 1.315966  | -0.485906 |
| 16            | 6             | 0           | -2.964073               | 0.651850  | -0.383410 |
| 17            | 1             | 0           | -1.524018               | 1.975464  | 0.285393  |
| 18            | 6             | 0           | -2.946088               | -0.684598 | -1.119376 |
| 19            | 1             | 0           | -3.736182               | 1.307687  | -0.812355 |
| 20            | 6             | 0           | -3.305846               | 0.535515  | 1.099110  |
| 21            | 16            | 0           | -1.592036               | -1.750284 | -0.468142 |
| 22            | 1             | 0           | -2.811343               | -0.498995 | -2.188506 |
| 23            | 1             | 0           | -3.899716               | -1.194357 | -0.978150 |
| 24            | 8             | 0           | -4.368966               | -0.259622 | 1.304905  |
| 25            | 8             | 0           | -2.742340               | 1.145709  | 1.972273  |
| 26            | 1             | 0           | -4.534239               | -0.289750 | 2.259189  |
| 27            | 1             | 0           | -1.556676               | 1.836800  | -1.355730 |

HF=-1570.9808775\ZeroPoint=0.1834523\Thermal=0.2010206

Cis-Pd(Cys<sup>3D</sup>)<sub>2</sub>

| Center Number | Atomic Number | Atomic Type | Coordinates (Angstroms) |           |           |
|---------------|---------------|-------------|-------------------------|-----------|-----------|
|               |               |             | X                       | Y         | Z         |
| 1             | 46            | 0           | 0.000005                | 0.100914  | -0.000017 |
| 2             | 16            | 0           | 1.597100                | 1.706910  | -0.474935 |
| 3             | 6             | 0           | 2.699778                | 0.623511  | -1.475116 |
| 4             | 1             | 0           | 2.313123                | 0.504054  | -2.491909 |
| 5             | 1             | 0           | 3.679837                | 1.098582  | -1.537837 |
| 6             | 6             | 0           | 2.833687                | -0.754965 | -0.836273 |
| 7             | 1             | 0           | 3.474623                | -1.395217 | -1.461985 |
| 8             | 7             | 0           | 1.486430                | -1.366096 | -0.683898 |
| 9             | 1             | 0           | 1.552143                | -2.155046 | -0.043514 |
| 10            | 6             | 0           | 3.488878                | -0.743936 | 0.540121  |
| 11            | 8             | 0           | 4.601600                | 0.006481  | 0.558849  |
| 12            | 8             | 0           | 3.102253                | -1.397973 | 1.477872  |
| 13            | 1             | 0           | 1.167219                | -1.711156 | -1.585687 |
| 14            | 1             | 0           | 4.966108                | -0.025774 | 1.455997  |
| 15            | 7             | 0           | -1.486420               | -1.366123 | 0.683823  |
| 16            | 6             | 0           | -2.833668               | -0.754991 | 0.836268  |
| 17            | 1             | 0           | -1.552155               | -2.155032 | 0.043391  |
| 18            | 6             | 0           | -2.699732               | 0.623464  | 1.475153  |
| 19            | 1             | 0           | -3.474585               | -1.395259 | 1.461982  |
| 20            | 6             | 0           | -3.488909               | -0.743909 | -0.540102 |
| 21            | 16            | 0           | -1.597091               | 1.706892  | 0.474964  |
| 22            | 1             | 0           | -2.313037               | 0.503973  | 2.491926  |

|    |   |   |           |           |           |
|----|---|---|-----------|-----------|-----------|
| 23 | 1 | 0 | -3.679788 | 1.098534  | 1.537927  |
| 24 | 8 | 0 | -4.601617 | 0.006532  | -0.558769 |
| 25 | 8 | 0 | -3.102335 | -1.397931 | -1.477884 |
| 26 | 1 | 0 | -4.966158 | -0.025692 | -1.455904 |
| 27 | 1 | 0 | -1.167187 | -1.711239 | 1.585582  |

HF=-1570.9773954\ZeroPoint=0.1828109\Thermal=0.2005923

PdCl(Cys<sup>3D</sup>)(Cys<sup>4D</sup>) isomer 1

| Center Number | Atomic Number | Atomic Type | Coordinates (Angstroms) |           |           |
|---------------|---------------|-------------|-------------------------|-----------|-----------|
|               |               |             | X                       | Y         | Z         |
| 1             | 46            | 0           | -0.322822               | -0.155936 | -0.578247 |
| 2             | 7             | 0           | 3.273037                | 0.798289  | -0.910414 |
| 3             | 6             | 0           | 3.047322                | 0.224860  | 0.449147  |
| 4             | 1             | 0           | 2.607521                | 1.594575  | -1.061316 |
| 5             | 6             | 0           | 2.624565                | -1.268474 | 0.323740  |
| 6             | 1             | 0           | 2.226942                | 0.780905  | 0.904374  |
| 7             | 6             | 0           | 4.310900                | 0.395774  | 1.261939  |
| 8             | 16            | 0           | 1.526390                | -1.522688 | -1.119918 |
| 9             | 1             | 0           | 2.141067                | -1.567785 | 1.251946  |
| 10            | 1             | 0           | 3.507208                | -1.897451 | 0.172530  |
| 11            | 8             | 0           | 5.373386                | 0.750037  | 0.807326  |
| 12            | 8             | 0           | 4.108549                | 0.069743  | 2.545276  |
| 13            | 1             | 0           | 4.254411                | 1.043606  | -1.059633 |
| 14            | 8             | 0           | -5.604635               | 0.139918  | 0.564403  |
| 15            | 6             | 0           | -4.430455               | 0.780859  | 0.734736  |
| 16            | 6             | 0           | -3.286135               | 0.036959  | 0.061107  |
| 17            | 8             | 0           | -4.309532               | 1.796143  | 1.374779  |
| 18            | 7             | 0           | -2.108590               | 0.919955  | -0.096439 |
| 19            | 6             | 0           | -2.877015               | -1.186162 | 0.890152  |
| 20            | 1             | 0           | -3.600680               | -0.298236 | -0.928508 |
| 21            | 1             | 0           | -2.259805               | 1.627658  | -0.812278 |
| 22            | 1             | 0           | -1.948546               | 1.435991  | 0.768832  |
| 23            | 16            | 0           | -1.447736               | -2.050985 | 0.104450  |
| 24            | 1             | 0           | -3.707889               | -1.890928 | 0.951967  |
| 25            | 1             | 0           | -2.621059               | -0.865641 | 1.905098  |
| 26            | 17            | 0           | 0.611165                | 2.091660  | -1.138197 |
| 27            | 1             | 0           | 4.949033                | 0.158951  | 3.020828  |
| 28            | 1             | 0           | 2.911299                | 0.065009  | -1.578809 |
| 29            | 1             | 0           | -6.286332               | 0.629615  | 1.049918  |

HF=-2031.8430125\ZeroPoint=0.192275\Thermal=0.2127661

PdCl(Cys<sup>3D</sup>)(Cys<sup>4D</sup>) isomer 2

| Center Number | Atomic Number | Atomic Type | Coordinates (Angstroms) |           |           |
|---------------|---------------|-------------|-------------------------|-----------|-----------|
|               |               |             | X                       | Y         | Z         |
| 1             | 46            | 0           | -0.441544               | -0.556553 | -0.072988 |
| 2             | 7             | 0           | 3.105478                | -0.652678 | 0.992513  |
| 3             | 6             | 0           | 3.749776                | -0.069257 | -0.217249 |
| 4             | 1             | 0           | 2.537614                | -1.503820 | 0.718442  |
| 5             | 6             | 0           | 2.648570                | 0.410625  | -1.195672 |
| 6             | 1             | 0           | 4.354070                | -0.845493 | -0.695855 |
| 7             | 6             | 0           | 4.696743                | 1.022415  | 0.265140  |
| 8             | 16            | 0           | 1.251913                | 1.200184  | -0.301801 |

|    |    |   |           |           |           |
|----|----|---|-----------|-----------|-----------|
| 9  | 1  | 0 | 2.283352  | -0.450002 | -1.753201 |
| 10 | 1  | 0 | 3.092309  | 1.121810  | -1.890349 |
| 11 | 8  | 0 | 4.975174  | 1.206439  | 1.424213  |
| 12 | 8  | 0 | 5.214541  | 1.716276  | -0.757182 |
| 13 | 1  | 0 | 3.764186  | -0.818552 | 1.752288  |
| 14 | 8  | 0 | -5.434523 | 1.449167  | -0.471873 |
| 15 | 6  | 0 | -4.221347 | 1.673256  | 0.069676  |
| 16 | 6  | 0 | -3.240727 | 0.563926  | -0.280465 |
| 17 | 8  | 0 | -3.966046 | 2.620942  | 0.772118  |
| 18 | 7  | 0 | -1.850720 | 1.003386  | 0.005635  |
| 19 | 6  | 0 | -3.530041 | -0.705437 | 0.525588  |
| 20 | 1  | 0 | -3.313556 | 0.330954  | -1.343910 |
| 21 | 1  | 0 | -1.560601 | 1.733698  | -0.642372 |
| 22 | 1  | 0 | -1.824310 | 1.428660  | 0.933018  |
| 23 | 16 | 0 | -2.277740 | -1.997752 | 0.136939  |
| 24 | 1  | 0 | -4.519008 | -1.088466 | 0.269239  |
| 25 | 1  | 0 | -3.522359 | -0.463612 | 1.593966  |
| 26 | 17 | 0 | 1.032275  | -2.437990 | -0.198282 |
| 27 | 1  | 0 | 5.816348  | 2.385393  | -0.396039 |
| 28 | 1  | 0 | 2.382221  | 0.049817  | 1.273050  |
| 29 | 1  | 0 | -6.029031 | 2.157246  | -0.179584 |

HF=-2031.8350277\ZeroPoint=0.1927193\Thermal=0.2130853

*Trans*-Pd(Ala<sup>2D</sup>)<sub>2</sub>

| Center Number | Atomic Number | Atomic Type | Coordinates (Angstroms) |           |           |
|---------------|---------------|-------------|-------------------------|-----------|-----------|
|               |               |             | X                       | Y         | Z         |
| 1             | 46            | 0           | -0.000000               | -0.000003 | -0.091869 |
| 2             | 6             | 0           | 4.107236                | -1.198806 | -0.085405 |
| 3             | 1             | 0           | 4.209207                | -2.238278 | 0.238691  |
| 4             | 1             | 0           | 4.946738                | -0.619052 | 0.298496  |
| 5             | 6             | 0           | 2.806598                | -0.588132 | 0.415733  |
| 6             | 1             | 0           | 2.753774                | -0.657230 | 1.506632  |
| 7             | 7             | 0           | 1.597778                | -1.310646 | -0.102483 |
| 8             | 1             | 0           | 1.398692                | -2.153029 | 0.432099  |
| 9             | 6             | 0           | 2.690623                | 0.929553  | 0.100057  |
| 10            | 8             | 0           | 3.689349                | 1.619054  | 0.095827  |
| 11            | 8             | 0           | 1.476328                | 1.376255  | -0.093761 |
| 12            | 1             | 0           | 1.750127                | -1.604640 | -1.066277 |
| 13            | 7             | 0           | -1.597775               | 1.310641  | -0.102499 |
| 14            | 6             | 0           | -2.806592               | 0.588135  | 0.415731  |
| 15            | 1             | 0           | -1.398685               | 2.153031  | 0.432070  |
| 16            | 6             | 0           | -4.107233               | 1.198816  | -0.085392 |
| 17            | 1             | 0           | -2.753756               | 0.657234  | 1.506630  |
| 18            | 6             | 0           | -2.690627               | -0.929548 | 0.100055  |
| 19            | 1             | 0           | -4.209192               | 2.238290  | 0.238702  |
| 20            | 1             | 0           | -4.946735               | 0.619070  | 0.298523  |
| 21            | 8             | 0           | -3.689355               | -1.619045 | 0.095817  |
| 22            | 8             | 0           | -1.476330               | -1.376258 | -0.093752 |
| 23            | 1             | 0           | -1.750129               | 1.604622  | -1.066297 |
| 24            | 1             | 0           | 4.155997                | -1.161693 | -1.178073 |
| 25            | 1             | 0           | -4.156009               | 1.161699  | -1.178058 |

HF=-774.5096654\ZeroPoint=0.1838008\Thermal=0.1986061

*Cis*-Pd(Ala<sup>2D</sup>)<sub>2</sub>

| Center Number | Atomic Number | Atomic Type | Coordinates (Angstroms) |           |           |
|---------------|---------------|-------------|-------------------------|-----------|-----------|
|               |               |             | X                       | Y         | Z         |
| 1             | 46            | 0           | -0.000000               | -0.042821 | 0.000004  |
| 2             | 6             | 0           | 4.158249                | -1.179268 | -0.111328 |
| 3             | 1             | 0           | 4.280588                | -2.213492 | 0.224320  |
| 4             | 1             | 0           | 4.984716                | -0.579378 | 0.270295  |
| 5             | 6             | 0           | 2.847236                | -0.584062 | 0.377967  |
| 6             | 1             | 0           | 2.784176                | -0.645639 | 1.468682  |
| 7             | 7             | 0           | 1.648012                | -1.324684 | -0.147699 |
| 8             | 1             | 0           | 1.558405                | -2.224025 | 0.318868  |
| 9             | 6             | 0           | 2.694268                | 0.921086  | 0.033244  |
| 10            | 8             | 0           | 3.681995                | 1.625050  | -0.023556 |
| 11            | 8             | 0           | 1.469091                | 1.330960  | -0.136403 |
| 12            | 1             | 0           | 1.791127                | -1.524140 | -1.137448 |
| 13            | 7             | 0           | -1.648009               | -1.324688 | 0.147677  |
| 14            | 6             | 0           | -2.847238               | -0.584063 | -0.377973 |
| 15            | 1             | 0           | -1.558405               | -2.224026 | -0.318897 |
| 16            | 6             | 0           | -4.158246               | -1.179268 | 0.111338  |
| 17            | 1             | 0           | -2.784193               | -0.645640 | -1.468689 |
| 18            | 6             | 0           | -2.694268               | 0.921084  | -0.033248 |
| 19            | 1             | 0           | -4.280588               | -2.213492 | -0.224306 |
| 20            | 1             | 0           | -4.984716               | -0.579377 | -0.270277 |
| 21            | 8             | 0           | -3.681993               | 1.625054  | 0.023505  |
| 22            | 8             | 0           | -1.469098               | 1.330950  | 0.136452  |
| 23            | 1             | 0           | -1.791114               | -1.524150 | 1.137427  |
| 24            | 1             | 0           | 4.213684                | -1.150211 | -1.203876 |
| 25            | 1             | 0           | -4.213668               | -1.150209 | 1.203888  |

HF=-774.4934486\ZeroPoint=0.1835683\Thermal=0.1984247

PdCl(Ala<sup>2D</sup>)(Ala<sup>3D</sup>) isomer 1

| Center Number | Atomic Number | Atomic Type | Coordinates (Angstroms) |           |           |
|---------------|---------------|-------------|-------------------------|-----------|-----------|
|               |               |             | X                       | Y         | Z         |
| 1             | 46            | 0           | 0.274556                | -0.515530 | -0.443022 |
| 2             | 7             | 0           | -3.444923               | -0.488594 | -0.040859 |
| 3             | 6             | 0           | -3.065013               | 0.926559  | 0.335468  |
| 4             | 1             | 0           | -2.658164               | -1.166278 | 0.224481  |
| 5             | 6             | 0           | -2.798492               | 1.011931  | 1.834086  |
| 6             | 1             | 0           | -3.893978               | 1.576444  | 0.045683  |
| 7             | 6             | 0           | -1.815573               | 1.315170  | -0.498002 |
| 8             | 1             | 0           | -2.483017               | 2.028153  | 2.068361  |
| 9             | 1             | 0           | -1.997922               | 0.324869  | 2.118972  |
| 10            | 8             | 0           | -1.421113               | 0.386999  | -1.307990 |
| 11            | 8             | 0           | -1.323374               | 2.419474  | -0.319604 |
| 12            | 1             | 0           | -4.314898               | -0.787305 | 0.399689  |
| 13            | 8             | 0           | 4.087851                | -0.557528 | 0.782005  |
| 14            | 6             | 0           | 2.979974                | -0.315158 | 0.352131  |
| 15            | 6             | 0           | 2.645376                | 1.115732  | -0.135344 |
| 16            | 8             | 0           | 1.998883                | -1.186606 | 0.313366  |
| 17            | 7             | 0           | 1.437084                | 1.079309  | -1.019010 |
| 18            | 6             | 0           | 2.387124                | 2.019498  | 1.069714  |
| 19            | 1             | 0           | 3.503053                | 1.486442  | -0.700600 |
| 20            | 1             | 0           | 0.849249                | 1.912376  | -0.935680 |
| 21            | 1             | 0           | 1.690227                | 0.967579  | -1.997382 |

|                                                       |        |        |                         |           |           |                                                        |    |   |           |           |           |
|-------------------------------------------------------|--------|--------|-------------------------|-----------|-----------|--------------------------------------------------------|----|---|-----------|-----------|-----------|
| 22                                                    | 1      | 0      | 3.258474                | 2.001186  | 1.724826  | 9                                                      | 1  | 0 | 3.992322  | 0.684188  | 1.155882  |
| 23                                                    | 1      | 0      | 1.519170                | 1.666908  | 1.633237  | 10                                                     | 8  | 0 | 1.208793  | -0.951319 | -0.724978 |
| 24                                                    | 17     | 0      | -1.046040               | -2.272310 | 0.447651  | 11                                                     | 8  | 0 | 2.256637  | -1.828389 | 1.093427  |
| 25                                                    | 1      | 0      | -3.511440               | -0.572600 | -1.057006 | 12                                                     | 1  | 0 | 3.870277  | 0.967236  | -1.933295 |
| 26                                                    | 1      | 0      | -3.693776               | 0.779271  | 2.417543  | 13                                                     | 8  | 0 | -3.909114 | -1.843046 | -0.156556 |
| 27                                                    | 1      | 0      | 2.202647                | 3.050470  | 0.755358  | 14                                                     | 6  | 0 | -2.972545 | -1.083584 | -0.010962 |
| -----                                                 |        |        |                         |           |           |                                                        |    |   |           |           |           |
| HF=-1235.362421\ZeroPoint=0.1931396\Thermal=0.2104737 |        |        |                         |           |           |                                                        |    |   |           |           |           |
| PdCl(Ala <sup>2D</sup> )(Ala <sup>3D</sup> ) isomer 2 |        |        |                         |           |           |                                                        |    |   |           |           |           |
| -----                                                 |        |        |                         |           |           |                                                        |    |   |           |           |           |
| Center                                                | Atomic | Atomic | Coordinates (Angstroms) |           |           |                                                        |    |   |           |           |           |
| Number                                                | Number | Type   | X                       | Y         | Z         |                                                        |    |   |           |           |           |
| -----                                                 |        |        |                         |           |           |                                                        |    |   |           |           |           |
| 1                                                     | 46     | 0      | -0.380333               | 0.082522  | 0.095171  | 22                                                     | 1  | 0 | -4.564441 | 0.616242  | -1.394472 |
| 2                                                     | 7      | 0      | 3.101391                | 0.534408  | -1.423043 | 23                                                     | 1  | 0 | -2.891412 | 1.097691  | -1.726871 |
| 3                                                     | 6      | 0      | 3.535941                | -0.602481 | -0.516953 | 24                                                     | 17 | 0 | 1.046886  | 1.986022  | 0.380273  |
| 4                                                     | 1      | 0      | 2.585272                | 1.245481  | -0.845093 | 25                                                     | 1  | 0 | 2.379246  | 0.162252  | -2.050339 |
| 5                                                     | 6      | 0      | 4.476067                | -0.095784 | 0.563001  | 26                                                     | 1  | 0 | 5.409425  | 0.290731  | 0.143152  |
| 6                                                     | 1      | 0      | 4.020722                | -1.343937 | -1.157309 | 27                                                     | 1  | 0 | -3.956530 | 2.166013  | -0.782535 |
| 7                                                     | 6      | 0      | 2.216702                | -1.214270 | 0.050746  | -----                                                  |    |   |           |           |           |
| 8                                                     | 1      | 0      | 4.706113                | -0.924599 | 1.231349  | HF=-1235.3579978\ZeroPoint=0.1930661\Thermal=0.2106655 |    |   |           |           |           |

## Precursor complexes and their isomers

### M1-CI

| Center Number | Atomic Number | Atomic Type | Coordinates (Angstroms) |           |           |
|---------------|---------------|-------------|-------------------------|-----------|-----------|
|               |               |             | X                       | Y         | Z         |
| 1             | 46            | 0           | -1.735983               | 0.517349  | -0.102632 |
| 2             | 7             | 0           | -4.618837               | 0.606238  | -0.005207 |
| 3             | 7             | 0           | -3.668815               | -0.225467 | -0.093136 |
| 4             | 6             | 0           | -4.188848               | 1.921241  | -0.020706 |
| 5             | 6             | 0           | -2.797038               | 2.183908  | -0.110477 |
| 6             | 6             | 0           | -2.381024               | 3.508954  | -0.151071 |
| 7             | 1             | 0           | -1.327642               | 3.749164  | -0.218430 |
| 8             | 6             | 0           | -3.328660               | 4.539555  | -0.107205 |
| 9             | 6             | 0           | -4.697400               | 4.269836  | -0.014931 |
| 10            | 1             | 0           | -5.411400               | 5.083860  | 0.020307  |
| 11            | 6             | 0           | -5.135870               | 2.953271  | 0.028769  |
| 12            | 1             | 0           | -6.187973               | 2.703492  | 0.098559  |
| 13            | 6             | 0           | -4.042304               | -1.602113 | -0.063064 |
| 14            | 6             | 0           | -3.375267               | -2.498664 | -0.899278 |
| 15            | 6             | 0           | -3.743615               | -3.840232 | -0.893711 |
| 16            | 1             | 0           | -3.233885               | -4.535827 | -1.549778 |
| 17            | 6             | 0           | -4.755387               | -4.287994 | -0.045451 |
| 18            | 6             | 0           | -5.410671               | -3.386400 | 0.795599  |
| 19            | 1             | 0           | -6.191128               | -3.733662 | 1.462754  |
| 20            | 6             | 0           | -5.062487               | -2.041166 | 0.787508  |
| 21            | 1             | 0           | -2.588118               | -2.142758 | -1.549670 |
| 22            | 17            | 0           | 0.384444                | 1.608393  | -0.072457 |
| 23            | 17            | 0           | -0.384436               | -1.608360 | 0.072924  |
| 24            | 46            | 0           | 1.735996                | -0.517345 | 0.102805  |
| 25            | 7             | 0           | 3.668824                | 0.225456  | 0.093005  |
| 26            | 6             | 0           | 2.797039                | -2.183916 | 0.110385  |
| 27            | 7             | 0           | 4.618830                | -0.606251 | 0.004888  |
| 28            | 6             | 0           | 4.042310                | 1.602107  | 0.062992  |
| 29            | 6             | 0           | 4.188836                | -1.921253 | 0.020405  |
| 30            | 6             | 0           | 2.381023                | -3.508962 | 0.150979  |
| 31            | 6             | 0           | 3.375387                | 2.498586  | 0.899374  |
| 32            | 6             | 0           | 5.062366                | 2.041236  | -0.787693 |
| 33            | 6             | 0           | 5.135844                | -2.953286 | -0.029275 |
| 34            | 1             | 0           | 1.327651                | -3.749170 | 0.218499  |
| 35            | 6             | 0           | 3.328646                | -4.539566 | 0.106908  |
| 36            | 6             | 0           | 3.743727                | 3.840158  | 0.893865  |
| 37            | 1             | 0           | 2.588333                | 2.142623  | 1.549850  |
| 38            | 6             | 0           | 5.410542                | 3.386472  | -0.795722 |
| 39            | 6             | 0           | 4.697372                | -4.269852 | 0.014425  |
| 40            | 1             | 0           | 6.187938                | -2.703513 | -0.099221 |
| 41            | 1             | 0           | 3.234087                | 4.535695  | 1.550062  |
| 42            | 6             | 0           | 4.755376                | 4.287993  | 0.045498  |
| 43            | 1             | 0           | 6.190900                | 3.733793  | -1.462963 |
| 44            | 1             | 0           | 5.411362                | -5.083878 | -0.020973 |
| 45            | 1             | 0           | -5.558249               | -1.328580 | 1.433671  |
| 46            | 1             | 0           | 5.558038                | 1.328708  | -1.433989 |
| 47            | 1             | 0           | 5.029493                | 5.336639  | 0.034277  |
| 48            | 1             | 0           | -5.029510               | -5.336637 | -0.034182 |
| 49            | 1             | 0           | 2.989069                | -5.569347 | 0.145532  |
| 50            | 1             | 0           | -2.989085               | 5.569336  | -0.145825 |

HF=-2321.1339726\ZeroPoint=0.3652855\Thermal=0.3942601

### D1-CI

| Center Number | Atomic Number | Atomic Type | Coordinates (Angstroms) |           |           |
|---------------|---------------|-------------|-------------------------|-----------|-----------|
|               |               |             | X                       | Y         | Z         |
| 1             | 46            | 0           | -2.131081               | 1.135778  | -0.251819 |
| 2             | 46            | 0           | 2.131151                | -1.135811 | -0.251932 |
| 3             | 17            | 0           | -3.659434               | 2.862229  | 0.115815  |
| 4             | 17            | 0           | 3.659541                | -2.862246 | 0.115631  |
| 5             | 7             | 0           | -0.595250               | -0.248664 | -0.548698 |
| 6             | 7             | 0           | 0.595292                | 0.248606  | -0.548738 |
| 7             | 7             | 0           | -5.642084               | -1.019674 | 1.331609  |
| 8             | 7             | 0           | 5.641885                | 1.019819  | 1.331812  |
| 9             | 8             | 0           | -3.711180               | -0.338854 | 0.350095  |
| 10            | 8             | 0           | 3.711204                | 0.338881  | 0.349962  |
| 11            | 6             | 0           | -0.626761               | -1.641726 | -0.645300 |
| 12            | 6             | 0           | 0.609799                | -2.331947 | -0.587976 |
| 13            | 6             | 0           | 0.600886                | -3.714458 | -0.753433 |
| 14            | 1             | 0           | 1.529683                | -4.265464 | -0.702813 |
| 15            | 6             | 0           | -0.601317               | -4.385842 | -0.991039 |
| 16            | 6             | 0           | -1.811379               | -3.690780 | -1.066409 |
| 17            | 1             | 0           | -2.733901               | -4.221985 | -1.270909 |
| 18            | 6             | 0           | -1.832289               | -2.314780 | -0.893382 |
| 19            | 1             | 0           | -2.754388               | -1.758304 | -0.952319 |
| 20            | 6             | 0           | 0.626801                | 1.641665  | -0.645400 |
| 21            | 6             | 0           | -0.609753               | 2.331893  | -0.588041 |
| 22            | 6             | 0           | -0.600847               | 3.714394  | -0.753585 |
| 23            | 1             | 0           | -1.529640               | 4.265406  | -0.702940 |
| 24            | 6             | 0           | 0.601343                | 4.385760  | -0.991305 |
| 25            | 1             | 0           | 0.588439                | 5.462034  | -1.127602 |
| 26            | 6             | 0           | 1.811400                | 3.690691  | -1.066699 |
| 27            | 1             | 0           | 2.733911                | 4.221883  | -1.271282 |
| 28            | 6             | 0           | 1.832319                | 2.314702  | -0.893589 |
| 29            | 1             | 0           | 2.754415                | 1.758223  | -0.952544 |
| 30            | 6             | 0           | -4.819058               | -0.082302 | 0.844945  |
| 31            | 1             | 0           | -5.181217               | 0.948743  | 0.911352  |
| 32            | 6             | 0           | -6.952777               | -0.670440 | 1.863500  |
| 33            | 1             | 0           | -7.036060               | -0.989554 | 2.906485  |
| 34            | 1             | 0           | -7.741418               | -1.159051 | 1.283273  |
| 35            | 1             | 0           | -7.097694               | 0.408683  | 1.813213  |
| 36            | 6             | 0           | -5.277647               | -2.432919 | 1.317260  |
| 37            | 1             | 0           | -4.235711               | -2.531849 | 1.021100  |
| 38            | 1             | 0           | -5.910259               | -2.981124 | 0.612138  |
| 39            | 1             | 0           | -5.413892               | -2.856864 | 2.315565  |
| 40            | 6             | 0           | 4.818958                | 0.082377  | 0.845116  |
| 41            | 1             | 0           | 5.181069                | -0.948666 | 0.911804  |
| 42            | 6             | 0           | 5.277478                | 2.433069  | 1.317105  |
| 43            | 1             | 0           | 5.910283                | 2.981130  | 0.612044  |
| 44            | 1             | 0           | 5.413472                | 2.857198  | 2.315366  |
| 45            | 1             | 0           | 4.235621                | 2.531960  | 1.020653  |
| 46            | 6             | 0           | 6.952434                | 0.670654  | 1.864101  |
| 47            | 1             | 0           | 7.097346                | -0.408479 | 1.814036  |

|    |   |   |           |           |           |
|----|---|---|-----------|-----------|-----------|
| 48 | 1 | 0 | 7.035452  | 0.989946  | 2.907054  |
| 49 | 1 | 0 | 7.741232  | 1.159155  | 1.283994  |
| 50 | 1 | 0 | -0.588419 | -5.462124 | -1.127273 |

-----

HF=-2245.4106195\ZeroPoint=0.3816984\Thermal=0.4136926

**M1-OAc**

| Center Number | Atomic Number | Atomic Type | Coordinates (Angstroms) |           |           |
|---------------|---------------|-------------|-------------------------|-----------|-----------|
|               |               |             | X                       | Y         | Z         |
| 1             | 46            | 0           | -0.096767               | -0.847878 | 1.465331  |
| 2             | 46            | 0           | 0.096767                | -0.847903 | -1.465325 |
| 3             | 8             | 0           | -1.524483               | -2.326295 | 1.211509  |
| 4             | 8             | 0           | 1.524481                | -2.326318 | -1.211479 |
| 5             | 8             | 0           | 1.428683                | -2.344796 | 1.043173  |
| 6             | 8             | 0           | -1.428686               | -2.344812 | -1.043143 |
| 7             | 7             | 0           | 1.061866                | 0.853688  | 1.722792  |
| 8             | 7             | 0           | -1.061865               | 0.853662  | -1.722804 |
| 9             | 6             | 0           | -1.722600               | 2.888607  | 2.376427  |
| 10            | 1             | 0           | -1.266052               | 3.866266  | 2.478358  |
| 11            | 7             | 0           | 0.448514                | 1.944672  | 1.930613  |
| 12            | 6             | 0           | 3.035069                | 2.124359  | 0.999578  |
| 13            | 1             | 0           | 2.390303                | 2.938558  | 0.700018  |
| 14            | 6             | 0           | -3.086026               | 2.696180  | 2.553341  |
| 15            | 1             | 0           | -3.726802               | 3.535346  | 2.797087  |
| 16            | 7             | 0           | -0.448513               | 1.944644  | -1.930636 |
| 17            | 6             | 0           | 2.469927                | 0.960491  | 1.532726  |
| 18            | 6             | 0           | -2.831231               | 0.313734  | 2.093947  |
| 19            | 1             | 0           | -3.269535               | -0.670369 | 1.983419  |
| 20            | 6             | 0           | -3.035065               | 2.124342  | -0.999598 |
| 21            | 1             | 0           | -2.390297               | 2.938544  | -0.700047 |
| 22            | 6             | 0           | -3.277248               | -0.123468 | -1.887196 |
| 23            | 1             | 0           | -2.825940               | -1.021622 | -2.283528 |
| 24            | 6             | 0           | 3.277248                | -0.123444 | 1.887198  |
| 25            | 1             | 0           | 2.825938                | -1.021594 | 2.283538  |
| 26            | 6             | 0           | 1.722602                | 2.888572  | -2.376460 |
| 27            | 1             | 0           | 1.266056                | 3.866230  | -2.478400 |
| 28            | 6             | 0           | -1.462794               | 0.481877  | 1.920334  |
| 29            | 6             | 0           | 4.655524                | -0.032398 | 1.718746  |
| 30            | 1             | 0           | 5.283813                | -0.868764 | 2.002854  |
| 31            | 6             | 0           | 3.631429                | 1.414597  | -2.415081 |
| 32            | 6             | 0           | 3.086028                | 2.696142  | -2.553374 |
| 33            | 1             | 0           | 3.726804                | 3.535305  | -2.797129 |
| 34            | 6             | 0           | -0.918420               | 1.781784  | 2.068394  |
| 35            | 6             | 0           | 1.866489                | -2.748201 | -0.062559 |
| 36            | 6             | 0           | 5.225816                | 1.125021  | 1.190244  |
| 37            | 6             | 0           | 4.410339                | 2.199564  | 0.830459  |
| 38            | 1             | 0           | 4.846308                | 3.092710  | 0.398490  |
| 39            | 6             | 0           | -2.469925               | 0.960469  | -1.532736 |
| 40            | 6             | 0           | -3.631428               | 1.414635  | 2.415060  |
| 41            | 6             | 0           | -4.410334               | 2.199552  | -0.830477 |
| 42            | 1             | 0           | -4.846301               | 3.092702  | -0.398517 |
| 43            | 6             | 0           | 2.831231                | 0.313701  | -2.093957 |
| 44            | 1             | 0           | 3.269534                | -0.670402 | -1.983419 |
| 45            | 6             | 0           | -5.225814               | 1.125006  | -1.190252 |
| 46            | 6             | 0           | 1.462794                | 0.481847  | -1.920344 |
| 47            | 6             | 0           | -1.866493               | -2.748197 | 0.062595  |

|    |   |   |           |           |           |
|----|---|---|-----------|-----------|-----------|
| 48 | 6 | 0 | 0.918421  | 1.781753  | -2.068416 |
| 49 | 6 | 0 | -4.655524 | -0.032419 | -1.718743 |
| 50 | 1 | 0 | -5.283815 | -0.868785 | -2.002842 |
| 51 | 6 | 0 | 2.943468  | -3.812951 | -0.042179 |
| 52 | 1 | 0 | 3.909325  | -3.313658 | 0.084752  |
| 53 | 1 | 0 | 2.959932  | -4.366703 | -0.979849 |
| 54 | 1 | 0 | 2.793376  | -4.482800 | 0.804174  |
| 55 | 6 | 0 | -2.943475 | -3.812945 | 0.042233  |
| 56 | 1 | 0 | -2.793383 | -4.482810 | -0.804108 |
| 57 | 1 | 0 | -3.909330 | -3.313651 | -0.084709 |
| 58 | 1 | 0 | -2.959942 | -4.366679 | 0.979913  |
| 59 | 1 | 0 | 6.299204  | 1.187672  | 1.051334  |
| 60 | 1 | 0 | -6.299201 | 1.187661  | -1.051340 |
| 61 | 1 | 0 | -4.698184 | 1.272320  | 2.551311  |
| 62 | 1 | 0 | 4.698185  | 1.272280  | -2.551334 |

HF=-1857.7869146\ZeroPoint=0.4664743\Thermal=0.5017347

**D1-OAc**

| Center Number | Atomic Number | Atomic Type | Coordinates (Angstroms) |           |           |
|---------------|---------------|-------------|-------------------------|-----------|-----------|
|               |               |             | X                       | Y         | Z         |
| 1             | 8             | 0           | -4.348311               | 0.440707  | 1.074095  |
| 2             | 8             | 0           | -4.324548               | 0.368062  | -1.187760 |
| 3             | 6             | 0           | -4.877576               | 0.557906  | -0.067455 |
| 4             | 6             | 0           | -6.319433               | 1.016797  | -0.097362 |
| 5             | 1             | 0           | -6.818267               | 0.642498  | -0.990230 |
| 6             | 1             | 0           | -6.329002               | 2.110649  | -0.129933 |
| 7             | 1             | 0           | -6.838389               | 0.696002  | 0.804832  |
| 8             | 7             | 0           | 0.349945                | 0.588463  | 1.774387  |
| 9             | 7             | 0           | -0.386910               | -0.475474 | 1.800850  |
| 10            | 6             | 0           | -0.371467               | 1.782385  | 1.777641  |
| 11            | 6             | 0           | 1.741366                | -1.561615 | 1.824895  |
| 12            | 6             | 0           | -1.777739               | 1.672770  | 1.687705  |
| 13            | 6             | 0           | 0.333524                | -1.666298 | 1.893593  |
| 14            | 6             | 0           | -2.540869               | 2.831348  | 1.734945  |
| 15            | 1             | 0           | -3.619471               | 2.765827  | 1.665972  |
| 16            | 6             | 0           | 0.262419                | 3.024393  | 1.923946  |
| 17            | 1             | 0           | 1.339323                | 3.077696  | 1.995646  |
| 18            | 6             | 0           | -0.303995               | -2.896941 | 2.105572  |
| 19            | 1             | 0           | -1.382136               | -2.946179 | 2.159775  |
| 20            | 6             | 0           | 2.502587                | -2.714479 | 1.960325  |
| 21            | 1             | 0           | 3.582416                | -2.652891 | 1.909152  |
| 22            | 6             | 0           | -1.914064               | 4.072702  | 1.876679  |
| 23            | 6             | 0           | -0.522570               | 4.168027  | 1.970355  |
| 24            | 1             | 0           | -0.050828               | 5.136667  | 2.085012  |
| 25            | 6             | 0           | 0.479125                | -4.034972 | 2.239224  |
| 26            | 1             | 0           | 0.004571                | -4.994752 | 2.405287  |
| 27            | 6             | 0           | 1.872259                | -3.944865 | 2.167259  |
| 28            | 46            | 0           | -2.368232               | -0.263309 | -1.486243 |
| 29            | 46            | 0           | -2.399095               | -0.169933 | 1.452432  |
| 30            | 8             | 0           | -3.106567               | -2.196356 | 1.164955  |
| 31            | 8             | 0           | -3.082150               | -2.268416 | -1.085997 |
| 32            | 6             | 0           | -3.309304               | -2.762540 | 0.054121  |
| 33            | 6             | 0           | -3.825732               | -4.186434 | 0.093872  |
| 34            | 1             | 0           | -4.420064               | -4.354230 | 0.991422  |
| 35            | 1             | 0           | -2.961211               | -4.857902 | 0.123876  |



|    |    |   |           |           |           |
|----|----|---|-----------|-----------|-----------|
| 36 | 1  | 0 | -4.401566 | -4.410852 | -0.803380 |
| 37 | 8  | 0 | 4.348311  | -0.440707 | -1.074095 |
| 38 | 8  | 0 | 4.324548  | -0.368062 | 1.187760  |
| 39 | 6  | 0 | 4.877576  | -0.557906 | 0.067455  |
| 40 | 6  | 0 | 6.319433  | -1.016797 | 0.097362  |
| 41 | 1  | 0 | 6.818267  | -0.642498 | 0.990230  |
| 42 | 1  | 0 | 6.329002  | -2.110649 | 0.129933  |
| 43 | 1  | 0 | 6.838389  | -0.696002 | -0.804832 |
| 44 | 7  | 0 | -0.349945 | -0.588463 | -1.774387 |
| 45 | 7  | 0 | 0.386910  | 0.475474  | -1.800850 |
| 46 | 6  | 0 | 0.371467  | -1.782385 | -1.777641 |
| 47 | 6  | 0 | -1.741366 | 1.561615  | -1.824895 |
| 48 | 6  | 0 | 1.777739  | -1.672770 | -1.687705 |
| 49 | 6  | 0 | -0.333524 | 1.666298  | -1.893593 |
| 50 | 6  | 0 | 2.540869  | -2.831348 | -1.734945 |
| 51 | 1  | 0 | 3.619471  | -2.765827 | -1.665972 |
| 52 | 6  | 0 | -0.262419 | -3.024393 | -1.923946 |
| 53 | 1  | 0 | -1.339323 | -3.077696 | -1.995646 |
| 54 | 6  | 0 | 0.303995  | 2.896941  | -2.105572 |
| 55 | 1  | 0 | 1.382136  | 2.946179  | -2.159775 |
| 56 | 6  | 0 | -2.502587 | 2.714479  | -1.960325 |
| 57 | 1  | 0 | -3.582416 | 2.652891  | -1.909152 |
| 58 | 6  | 0 | 1.914064  | -4.072702 | -1.876679 |
| 59 | 6  | 0 | 0.522570  | -4.168027 | -1.970355 |
| 60 | 1  | 0 | 0.050828  | -5.136667 | -2.085012 |
| 61 | 6  | 0 | -0.479125 | 4.034972  | -2.239224 |
| 62 | 1  | 0 | -0.004571 | 4.994752  | -2.405287 |
| 63 | 6  | 0 | -1.872259 | 3.944865  | -2.167259 |
| 64 | 46 | 0 | 2.368232  | 0.263309  | 1.486243  |
| 65 | 46 | 0 | 2.399095  | 0.169933  | -1.452432 |
| 66 | 8  | 0 | 3.106567  | 2.196356  | -1.164955 |
| 67 | 8  | 0 | 3.082150  | 2.268416  | 1.085997  |
| 68 | 6  | 0 | 3.309304  | 2.762540  | -0.054121 |
| 69 | 6  | 0 | 3.825732  | 4.186434  | -0.093872 |
| 70 | 1  | 0 | 4.420064  | 4.354230  | -0.991422 |
| 71 | 1  | 0 | 2.961211  | 4.857902  | -0.123876 |
| 72 | 1  | 0 | 4.401566  | 4.410852  | 0.803380  |
| 73 | 1  | 0 | 2.474531  | -4.840708 | 2.275732  |
| 74 | 1  | 0 | -2.474531 | 4.840708  | -2.275732 |
| 75 | 1  | 0 | -2.517822 | 4.973208  | 1.916650  |
| 76 | 1  | 0 | 2.517822  | -4.973208 | -1.916650 |

HF=-2569.700523\ZeroPoint=0.5510627\Thermal=0.5985083

#### M1-1

| Center Number | Atomic Number | Atomic Type | Coordinates (Angstroms) |           |           |
|---------------|---------------|-------------|-------------------------|-----------|-----------|
|               |               |             | X                       | Y         | Z         |
| 1             | 46            | 0           | -0.249821               | -0.621762 | -0.130031 |
| 2             | 7             | 0           | -1.119734               | 1.291359  | -0.097665 |
| 3             | 7             | 0           | -2.377661               | 1.357394  | 0.057576  |
| 4             | 6             | 0           | -2.989602               | 0.114047  | 0.051069  |
| 5             | 6             | 0           | -2.193160               | -1.059328 | -0.068175 |
| 6             | 6             | 0           | -2.861410               | -2.281986 | -0.090113 |
| 7             | 1             | 0           | -2.301901               | -3.205811 | -0.181065 |
| 8             | 6             | 0           | -4.256052               | -2.334836 | 0.000245  |
| 9             | 6             | 0           | -5.022849               | -1.170222 | 0.121451  |

|    |    |   |           |           |           |
|----|----|---|-----------|-----------|-----------|
| 10 | 1  | 0 | -6.102252 | -1.232675 | 0.192701  |
| 11 | 6  | 0 | -4.389519 | 0.062813  | 0.148604  |
| 12 | 1  | 0 | -4.946230 | 0.988202  | 0.240799  |
| 13 | 6  | 0 | -0.423458 | 2.532430  | -0.056070 |
| 14 | 6  | 0 | 0.648854  | 2.722784  | -0.932056 |
| 15 | 6  | 0 | 1.366859  | 3.914709  | -0.900115 |
| 16 | 1  | 0 | 2.187599  | 4.065991  | -1.591636 |
| 17 | 6  | 0 | 1.026363  | 4.911903  | 0.014140  |
| 18 | 1  | 0 | 1.592353  | 5.835572  | 0.045963  |
| 19 | 6  | 0 | -0.045700 | 4.717533  | 0.886716  |
| 20 | 1  | 0 | -0.311473 | 5.490166  | 1.599144  |
| 21 | 6  | 0 | -0.775935 | 3.533941  | 0.854109  |
| 22 | 16 | 0 | 0.466873  | -2.813594 | 0.021909  |
| 23 | 6  | 0 | 2.275111  | -2.538024 | -0.206248 |
| 24 | 1  | 0 | 2.813445  | -3.368644 | 0.251587  |
| 25 | 1  | 0 | 2.523767  | -2.515100 | -1.272598 |
| 26 | 6  | 0 | 2.711855  | -1.218396 | 0.444191  |
| 27 | 1  | 0 | 2.521508  | -1.278460 | 1.517377  |
| 28 | 7  | 0 | 1.906156  | -0.109885 | -0.113592 |
| 29 | 1  | 0 | 2.231141  | 0.071832  | -1.063020 |
| 30 | 6  | 0 | 4.196510  | -0.976020 | 0.208331  |
| 31 | 8  | 0 | 4.958564  | -1.782125 | 0.974329  |
| 32 | 8  | 0 | 4.648092  | -0.186191 | -0.584923 |
| 33 | 1  | 0 | -4.751761 | -3.299959 | -0.022896 |
| 34 | 1  | 0 | 2.083305  | 0.752071  | 0.397805  |
| 35 | 1  | 0 | 0.880830  | 1.951993  | -1.656909 |
| 36 | 1  | 0 | 5.887776  | -1.616998 | 0.751965  |
| 37 | 1  | 0 | -1.608078 | 3.366736  | 1.525695  |

HF=-1421.8076215\ZeroPoint=0.2722108\Thermal=0.2929132

#### M1-2

| Center Number | Atomic Number | Atomic Type | Coordinates (Angstroms) |           |           |
|---------------|---------------|-------------|-------------------------|-----------|-----------|
|               |               |             | X                       | Y         | Z         |
| 1             | 46            | 0           | 0.253913                | 0.114939  | -0.106234 |
| 2             | 7             | 0           | -1.810063               | 0.288378  | -0.062777 |
| 3             | 7             | 0           | -2.300886               | 1.451029  | 0.057107  |
| 4             | 6             | 0           | -1.355086               | 2.463967  | 0.035020  |
| 5             | 6             | 0           | 0.016802                | 2.119495  | -0.090223 |
| 6             | 6             | 0           | 0.924175                | 3.177227  | -0.151285 |
| 7             | 1             | 0           | 1.989059                | 2.992559  | -0.268029 |
| 8             | 6             | 0           | 0.492338                | 4.507083  | -0.082457 |
| 9             | 6             | 0           | -0.864172               | 4.818217  | 0.052866  |
| 10            | 1             | 0           | -1.183333               | 5.852142  | 0.107186  |
| 11            | 6             | 0           | -1.798114               | 3.792229  | 0.109608  |
| 12            | 1             | 0           | -2.858657               | 3.993845  | 0.206645  |
| 13            | 6             | 0           | -2.759308               | -0.778217 | -0.019084 |
| 14            | 6             | 0           | -2.583109               | -1.878697 | -0.859518 |
| 15            | 6             | 0           | -3.514268               | -2.912953 | -0.835380 |
| 16            | 1             | 0           | -3.379455               | -3.765085 | -1.491034 |
| 17            | 6             | 0           | -4.605171               | -2.858806 | 0.030070  |
| 18            | 1             | 0           | -5.320466               | -3.672970 | 0.054448  |
| 19            | 6             | 0           | -4.770577               | -1.758074 | 0.873675  |
| 20            | 1             | 0           | -5.611503               | -1.717601 | 1.556527  |
| 21            | 6             | 0           | -3.855243               | -0.713431 | 0.849422  |
| 22            | 1             | 0           | -3.966749               | 0.145028  | 1.498679  |

|    |    |   |           |           |           |    |    |   |           |           |           |
|----|----|---|-----------|-----------|-----------|----|----|---|-----------|-----------|-----------|
| 23 | 16 | 0 | 0.551214  | -2.259976 | 0.017314  | 36 | 1  | 0 | 7.274374  | 1.581896  | 2.562158  |
| 24 | 6  | 0 | 2.376118  | -2.266210 | -0.221812 | 37 | 46 | 0 | -2.234984 | 0.830891  | -0.326459 |
| 25 | 1  | 0 | 2.795663  | -3.170422 | 0.220277  | 38 | 16 | 0 | -3.777938 | 2.299765  | 0.558429  |
| 26 | 1  | 0 | 2.624170  | -2.263234 | -1.288958 | 39 | 6  | 0 | -5.181705 | 1.134553  | 0.810453  |
| 27 | 6  | 0 | 3.005628  | -1.038546 | 0.445975  | 40 | 1  | 0 | -5.835240 | 1.542998  | 1.582095  |
| 28 | 1  | 0 | 2.819756  | -1.092122 | 1.520293  | 41 | 1  | 0 | -5.761462 | 1.032040  | -0.112704 |
| 29 | 7  | 0 | 2.355593  | 0.192439  | -0.073667 | 42 | 6  | 0 | -4.665129 | -0.242638 | 1.243216  |
| 30 | 1  | 0 | 2.688876  | 0.362619  | -1.023361 | 43 | 1  | 0 | -4.143369 | -0.137152 | 2.196121  |
| 31 | 6  | 0 | 4.504434  | -0.978055 | 0.191889  | 44 | 7  | 0 | -3.703882 | -0.741962 | 0.234822  |
| 32 | 8  | 0 | 5.163208  | -1.921301 | 0.891643  | 45 | 6  | 0 | -5.824320 | -1.216873 | 1.408348  |
| 33 | 8  | 0 | 5.043298  | -0.205118 | -0.563208 | 46 | 1  | 0 | -4.234797 | -1.050167 | -0.579971 |
| 34 | 1  | 0 | 1.221669  | 5.308857  | -0.137874 | 47 | 1  | 0 | -3.233904 | -1.575518 | 0.581512  |
| 35 | 1  | 0 | 2.654882  | 0.998357  | 0.469907  | 48 | 8  | 0 | -6.528433 | -0.963231 | 2.529111  |
| 36 | 1  | 0 | -1.727820 | -1.916661 | -1.519870 | 49 | 8  | 0 | -6.106211 | -2.089668 | 0.624159  |
| 37 | 1  | 0 | 6.103231  | -1.865865 | 0.660197  | 50 | 1  | 0 | -7.274370 | -1.581911 | 2.562154  |

HF=-1421.7983292\ZeroPoint=0.2723286\Thermal=0.2929422 HF=-2270.6872237\ZeroPoint=0.3540079\Thermal=0.3848609

### D1-1

| Center Number | Atomic Number | Atomic Type | Coordinates (Angstroms) |           |           |
|---------------|---------------|-------------|-------------------------|-----------|-----------|
|               |               |             | X                       | Y         | Z         |
| 1             | 46            | 0           | 2.234984                | -0.830891 | -0.326461 |
| 2             | 7             | 0           | 0.556613                | 0.325862  | -0.896748 |
| 3             | 7             | 0           | -0.556613               | -0.325859 | -0.896747 |
| 4             | 6             | 0           | -0.399038               | -1.715629 | -0.934885 |
| 5             | 6             | 0           | 0.890067                | -2.252036 | -0.698277 |
| 6             | 6             | 0           | 1.028558                | -3.639250 | -0.762932 |
| 7             | 1             | 0           | 1.995531                | -4.092980 | -0.580354 |
| 8             | 6             | 0           | -0.059906               | -4.455958 | -1.076887 |
| 9             | 6             | 0           | -1.315659               | -3.904036 | -1.349788 |
| 10            | 1             | 0           | -2.145893               | -4.541868 | -1.629087 |
| 11            | 6             | 0           | -1.488105               | -2.529481 | -1.281250 |
| 12            | 1             | 0           | -2.432492               | -2.076355 | -1.551602 |
| 13            | 6             | 0           | 0.399037                | 1.715632  | -0.934885 |
| 14            | 6             | 0           | 1.488103                | 2.529486  | -1.281249 |
| 15            | 6             | 0           | 1.315655                | 3.904040  | -1.349787 |
| 16            | 1             | 0           | 2.145888                | 4.541873  | -1.629085 |
| 17            | 6             | 0           | 0.059901                | 4.455960  | -1.076888 |
| 18            | 1             | 0           | -0.076403               | 5.531004  | -1.126492 |
| 19            | 6             | 0           | -1.028562               | 3.639251  | -0.762933 |
| 20            | 1             | 0           | -1.995536               | 4.092980  | -0.580357 |
| 21            | 6             | 0           | -0.890069               | 2.252037  | -0.698277 |
| 22            | 16            | 0           | 3.777939                | -2.299767 | 0.558424  |
| 23            | 6             | 0           | 5.181706                | -1.134554 | 0.810449  |
| 24            | 1             | 0           | 5.835241                | -1.542999 | 1.582091  |
| 25            | 1             | 0           | 5.761464                | -1.032042 | -0.112708 |
| 26            | 6             | 0           | 4.665131                | 0.242637  | 1.243210  |
| 27            | 1             | 0           | 4.143366                | 0.137150  | 2.196114  |
| 28            | 7             | 0           | 3.703888                | 0.741964  | 0.234816  |
| 29            | 1             | 0           | 4.234802                | 1.050158  | -0.579982 |
| 30            | 6             | 0           | 5.824321                | 1.216871  | 1.408352  |
| 31            | 8             | 0           | 6.528440                | 0.963213  | 2.529108  |
| 32            | 8             | 0           | 6.106207                | 2.089679  | 0.624175  |
| 33            | 1             | 0           | 0.076395                | -5.531002 | -1.126491 |
| 34            | 1             | 0           | 3.233917                | 1.575525  | 0.581500  |
| 35            | 1             | 0           | 2.432491                | 2.076361  | -1.551599 |

### B1-1

| Center Number | Atomic Number | Atomic Type | Coordinates (Angstroms) |           |           |
|---------------|---------------|-------------|-------------------------|-----------|-----------|
|               |               |             | X                       | Y         | Z         |
| 1             | 46            | 0           | -1.635589               | -0.345491 | -0.728837 |
| 2             | 46            | 0           | 1.551467                | 0.622908  | -0.375047 |
| 3             | 7             | 0           | -1.637085               | 1.438922  | 0.268384  |
| 4             | 7             | 0           | -2.483265               | 1.611639  | 1.189981  |
| 5             | 6             | 0           | -3.289145               | 0.499243  | 1.412632  |
| 6             | 6             | 0           | -3.098849               | -0.656105 | 0.610249  |
| 7             | 6             | 0           | -3.924935               | -1.747382 | 0.862850  |
| 8             | 1             | 0           | -3.836833               | -2.661950 | 0.282009  |
| 9             | 6             | 0           | -4.893610               | -1.700019 | 1.874473  |
| 10            | 6             | 0           | -5.059690               | -0.553927 | 2.654066  |
| 11            | 1             | 0           | -5.812035               | -0.529641 | 3.433427  |
| 12            | 6             | 0           | -4.254428               | 0.556684  | 2.423696  |
| 13            | 1             | 0           | -4.357870               | 1.463762  | 3.007692  |
| 14            | 6             | 0           | -0.824848               | 2.557958  | -0.085950 |
| 15            | 6             | 0           | 0.528313                | 2.371174  | -0.420395 |
| 16            | 6             | 0           | 1.247049                | 3.524863  | -0.775628 |
| 17            | 1             | 0           | 2.301963                | 3.439094  | -1.003382 |
| 18            | 6             | 0           | 0.647936                | 4.779743  | -0.829201 |
| 19            | 1             | 0           | 1.235246                | 5.641678  | -1.128117 |
| 20            | 6             | 0           | -0.699576               | 4.934224  | -0.492824 |
| 21            | 1             | 0           | -1.170579               | 5.909658  | -0.532783 |
| 22            | 6             | 0           | -1.433382               | 3.824819  | -0.110664 |
| 23            | 1             | 0           | -2.480044               | 3.909499  | 0.153033  |
| 24            | 16            | 0           | 2.608164                | 1.409957  | 1.572218  |
| 25            | 6             | 0           | 4.154248                | 0.425286  | 1.414974  |
| 26            | 1             | 0           | 4.679161                | 0.446372  | 2.370549  |
| 27            | 1             | 0           | 4.817301                | 0.850324  | 0.654647  |
| 28            | 6             | 0           | 3.833070                | -1.017447 | 1.026005  |
| 29            | 1             | 0           | 4.766604                | -1.598031 | 0.948600  |
| 30            | 6             | 0           | 3.020016                | -1.726783 | 2.098226  |
| 31            | 8             | 0           | 3.579912                | -1.595730 | 3.305406  |
| 32            | 8             | 0           | 2.036114                | -2.415916 | 1.920813  |
| 33            | 7             | 0           | 3.102285                | -1.029570 | -0.259145 |
| 34            | 1             | 0           | 3.747093                | -0.742935 | -0.992150 |
| 35            | 1             | 0           | 2.799486                | -1.973734 | -0.499329 |

|    |    |   |           |           |           |
|----|----|---|-----------|-----------|-----------|
| 36 | 16 | 0 | 0.154227  | 0.102212  | -2.313302 |
| 37 | 6  | 0 | 0.230370  | -1.599736 | -3.047546 |
| 38 | 1  | 0 | -0.330447 | -1.546757 | -3.984358 |
| 39 | 1  | 0 | 1.258412  | -1.870674 | -3.284558 |
| 40 | 6  | 0 | -0.378494 | -2.694302 | -2.160019 |
| 41 | 1  | 0 | -0.485112 | -3.612805 | -2.751868 |
| 42 | 7  | 0 | -1.705864 | -2.260401 | -1.639525 |
| 43 | 1  | 0 | -2.046847 | -2.925800 | -0.950485 |
| 44 | 6  | 0 | 0.589154  | -3.030179 | -1.032732 |
| 45 | 8  | 0 | 1.732064  | -3.359231 | -1.277422 |
| 46 | 8  | 0 | 0.073994  | -2.909664 | 0.177617  |
| 47 | 1  | 0 | -5.521597 | -2.566595 | 2.054178  |
| 48 | 1  | 0 | 0.798661  | -2.864920 | 0.851168  |
| 49 | 1  | 0 | -2.379654 | -2.232594 | -2.401912 |
| 50 | 1  | 0 | 3.020100  | -2.058315 | 3.947189  |

|    |    |   |           |           |           |
|----|----|---|-----------|-----------|-----------|
| 36 | 16 | 0 | 0.826430  | 0.651849  | -2.181513 |
| 37 | 6  | 0 | 2.243251  | 1.763677  | -1.752490 |
| 38 | 1  | 0 | 2.735322  | 2.041002  | -2.683522 |
| 39 | 1  | 0 | 1.869515  | 2.672922  | -1.281036 |
| 40 | 6  | 0 | 3.252421  | 1.050739  | -0.841789 |
| 41 | 1  | 0 | 3.722419  | 0.242236  | -1.410472 |
| 42 | 7  | 0 | 2.569361  | 0.444116  | 0.324227  |
| 43 | 1  | 0 | 2.040221  | 1.174729  | 0.822609  |
| 44 | 6  | 0 | 4.375358  | 1.970841  | -0.372147 |
| 45 | 8  | 0 | 4.958193  | 2.610407  | -1.405821 |
| 46 | 8  | 0 | 4.724692  | 2.094054  | 0.774386  |
| 47 | 1  | 0 | 3.112810  | -3.766746 | 3.642678  |
| 48 | 1  | 0 | 3.260405  | 0.083258  | 0.976851  |
| 49 | 1  | 0 | 5.668728  | 3.166273  | -1.050434 |
| 50 | 1  | 0 | -3.569308 | 2.078181  | 4.812815  |

HF=-2270.692385\ZeroPoint=0.3536452\Thermal=0.3836315

HF=-2270.6897024\ZeroPoint=0.353837\Thermal=0.3844445

### B1-2

| Center Number | Atomic Number | Atomic Type | Coordinates (Angstroms) |           |           |
|---------------|---------------|-------------|-------------------------|-----------|-----------|
|               |               |             | X                       | Y         | Z         |
| 1             | 46            | 0           | 1.040940                | -0.885326 | -0.237249 |
| 2             | 46            | 0           | -0.969729               | 1.131623  | -0.737532 |
| 3             | 7             | 0           | -0.578594               | -2.085078 | -0.577505 |
| 4             | 7             | 0           | -0.690823               | -3.150275 | 0.096406  |
| 5             | 6             | 0           | 0.345464                | -3.329177 | 1.005156  |
| 6             | 6             | 0           | 1.329031                | -2.309530 | 1.135699  |
| 7             | 6             | 0           | 2.315996                | -2.494931 | 2.100117  |
| 8             | 1             | 0           | 3.089726                | -1.749060 | 2.254136  |
| 9             | 6             | 0           | 2.333672                | -3.646445 | 2.897095  |
| 10            | 6             | 0           | 1.362635                | -4.640009 | 2.747626  |
| 11            | 1             | 0           | 1.390273                | -5.526120 | 3.370505  |
| 12            | 6             | 0           | 0.358053                | -4.482280 | 1.800127  |
| 13            | 1             | 0           | -0.415434               | -5.229185 | 1.663917  |
| 14            | 6             | 0           | -1.633967               | -1.758494 | -1.485442 |
| 15            | 6             | 0           | -1.925834               | -0.398502 | -1.713754 |
| 16            | 6             | 0           | -2.991254               | -0.125347 | -2.584473 |
| 17            | 1             | 0           | -3.256091               | 0.906190  | -2.793392 |
| 18            | 6             | 0           | -3.709534               | -1.142708 | -3.211169 |
| 19            | 1             | 0           | -4.514254               | -0.892877 | -3.894873 |
| 20            | 6             | 0           | -3.386848               | -2.481896 | -2.973218 |
| 21            | 1             | 0           | -3.935263               | -3.274871 | -3.468502 |
| 22            | 6             | 0           | -2.353195               | -2.793354 | -2.103928 |
| 23            | 1             | 0           | -2.084443               | -3.822039 | -1.899577 |
| 24            | 16            | 0           | 0.104312                | 2.801273  | 0.642080  |
| 25            | 6             | 0           | -1.232441               | 2.965801  | 1.896876  |
| 26            | 1             | 0           | -1.884169               | 3.803766  | 1.627237  |
| 27            | 1             | 0           | -0.794836               | 3.179802  | 2.872015  |
| 28            | 6             | 0           | -2.076805               | 1.684977  | 1.992936  |
| 29            | 1             | 0           | -1.442398               | 0.869845  | 2.347128  |
| 30            | 6             | 0           | -3.231852               | 1.877869  | 2.965546  |
| 31            | 8             | 0           | -2.801291               | 1.918308  | 4.243007  |
| 32            | 8             | 0           | -4.388107               | 2.005539  | 2.645509  |
| 33            | 7             | 0           | -2.585016               | 1.319518  | 0.650952  |
| 34            | 1             | 0           | -3.105699               | 0.446368  | 0.690234  |
| 35            | 1             | 0           | -3.252386               | 2.024915  | 0.340726  |

### B1-CI-1

| Center Number | Atomic Number | Atomic Type | Coordinates (Angstroms) |           |           |
|---------------|---------------|-------------|-------------------------|-----------|-----------|
|               |               |             | X                       | Y         | Z         |
| 1             | 46            | 0           | -1.287372               | 0.381165  | 0.762311  |
| 2             | 46            | 0           | 1.253661                | -1.024146 | 0.333528  |
| 3             | 7             | 0           | -2.067076               | -1.406829 | 0.005929  |
| 4             | 7             | 0           | -3.274605               | -1.383938 | -0.384825 |
| 5             | 6             | 0           | -3.890323               | -0.153427 | -0.187829 |
| 6             | 6             | 0           | -3.139610               | 0.942453  | 0.321785  |
| 7             | 6             | 0           | -3.804705               | 2.152026  | 0.533851  |
| 8             | 1             | 0           | -3.270648               | 2.987680  | 0.969902  |
| 9             | 6             | 0           | -5.161836               | 2.280997  | 0.215622  |
| 10            | 6             | 0           | -5.881210               | 1.203867  | -0.310443 |
| 11            | 1             | 0           | -6.932148               | 1.315957  | -0.549375 |
| 12            | 6             | 0           | -5.248369               | -0.017763 | -0.508227 |
| 13            | 1             | 0           | -5.784282               | -0.877147 | -0.893992 |
| 14            | 6             | 0           | -1.339515               | -2.612151 | -0.175271 |
| 15            | 6             | 0           | 0.074119                | -2.588067 | -0.142335 |
| 16            | 6             | 0           | 0.726278                | -3.809869 | -0.386539 |
| 17            | 1             | 0           | 1.808789                | -3.835421 | -0.402110 |
| 18            | 6             | 0           | 0.027029                | -4.991572 | -0.603533 |
| 19            | 1             | 0           | 0.571875                | -5.915393 | -0.767746 |
| 20            | 6             | 0           | -1.372335               | -4.993884 | -0.603142 |
| 21            | 1             | 0           | -1.922010               | -5.915216 | -0.757733 |
| 22            | 6             | 0           | -2.051432               | -3.808797 | -0.398965 |
| 23            | 1             | 0           | -3.132724               | -3.781168 | -0.397337 |
| 24            | 16            | 0           | 2.495032                | -1.163298 | -1.665793 |
| 25            | 6             | 0           | 3.882055                | -0.006830 | -1.227626 |
| 26            | 1             | 0           | 3.711541                | 0.951454  | -1.719106 |
| 27            | 1             | 0           | 4.811297                | -0.436196 | -1.598966 |
| 28            | 6             | 0           | 3.986735                | 0.209320  | 0.289788  |
| 29            | 1             | 0           | 4.321504                | -0.723686 | 0.752392  |
| 30            | 6             | 0           | 5.021700                | 1.280657  | 0.616113  |
| 31            | 8             | 0           | 6.255651                | 0.912952  | 0.198745  |
| 32            | 8             | 0           | 4.792791                | 2.321256  | 1.175348  |
| 33            | 7             | 0           | 2.667505                | 0.544796  | 0.847831  |
| 34            | 1             | 0           | 2.703445                | 0.644384  | 1.859911  |
| 35            | 1             | 0           | 2.337606                | 1.442879  | 0.491892  |

|    |    |   |           |           |           |
|----|----|---|-----------|-----------|-----------|
| 36 | 1  | 0 | -5.662128 | 3.227664  | 0.391143  |
| 37 | 1  | 0 | 6.868879  | 1.627860  | 0.427540  |
| 38 | 1  | 0 | -1.692425 | 1.345414  | -1.174062 |
| 39 | 7  | 0 | -1.618340 | 2.027745  | -1.988551 |
| 40 | 6  | 0 | -0.439603 | 2.920247  | -1.711096 |
| 41 | 6  | 0 | -0.568526 | 3.552116  | -0.317199 |
| 42 | 1  | 0 | -0.442874 | 3.707438  | -2.471772 |
| 43 | 6  | 0 | 0.842827  | 2.096793  | -1.897157 |
| 44 | 16 | 0 | -0.315115 | 2.464979  | 1.150384  |
| 45 | 1  | 0 | -1.531682 | 4.071873  | -0.265742 |
| 46 | 1  | 0 | 0.213362  | 4.309224  | -0.244694 |
| 47 | 8  | 0 | 0.605276  | 0.963184  | -2.532866 |
| 48 | 8  | 0 | 1.908432  | 2.506374  | -1.507102 |
| 49 | 1  | 0 | -1.475914 | 1.479274  | -2.837887 |
| 50 | 17 | 0 | 0.229453  | -0.805898 | 2.490486  |
| 51 | 1  | 0 | -2.500737 | 2.539675  | -2.018228 |
| 52 | 1  | 0 | 1.341322  | 0.244687  | -2.376776 |

HF=-2731.539569\ZeroPoint=0.3623087\Thermal=0.3948098

### B1-CI-2

| Center Number | Atomic Number | Atomic Type | Coordinates (Angstroms) |           |           |
|---------------|---------------|-------------|-------------------------|-----------|-----------|
|               |               |             | X                       | Y         | Z         |
| 1             | 46            | 0           | 0.801379                | -1.308974 | -0.581247 |
| 2             | 46            | 0           | -1.308894               | 1.270770  | -0.798134 |
| 3             | 7             | 0           | -1.212933               | -1.930828 | -0.329807 |
| 4             | 7             | 0           | -1.423500               | -2.825305 | 0.536781  |
| 5             | 6             | 0           | -0.277765               | -3.220142 | 1.216958  |
| 6             | 6             | 0           | 0.981263                | -2.657545 | 0.872252  |
| 7             | 6             | 0           | 2.093404                | -3.114651 | 1.578336  |
| 8             | 1             | 0           | 3.078274                | -2.743201 | 1.328363  |
| 9             | 6             | 0           | 1.955877                | -4.069566 | 2.592795  |
| 10            | 6             | 0           | 0.708742                | -4.604747 | 2.922557  |
| 11            | 1             | 0           | 0.620742                | -5.347762 | 3.706361  |
| 12            | 6             | 0           | -0.416048               | -4.181873 | 2.227009  |
| 13            | 1             | 0           | -1.401259               | -4.580150 | 2.440409  |
| 14            | 6             | 0           | -2.343382               | -1.551231 | -1.115768 |
| 15            | 6             | 0           | -2.521375               | -0.201991 | -1.449462 |
| 16            | 6             | 0           | -3.648831               | 0.131138  | -2.210320 |
| 17            | 1             | 0           | -3.824761               | 1.166053  | -2.486103 |
| 18            | 6             | 0           | -4.544947               | -0.845021 | -2.646769 |
| 19            | 1             | 0           | -5.396477               | -0.560879 | -3.256058 |
| 20            | 6             | 0           | -4.340632               | -2.185514 | -2.312278 |
| 21            | 1             | 0           | -5.028884               | -2.948243 | -2.657768 |
| 22            | 6             | 0           | -3.244219               | -2.540329 | -1.540072 |
| 23            | 1             | 0           | -3.061342               | -3.572502 | -1.268286 |
| 24            | 16            | 0           | -0.105246               | 3.211523  | 0.104144  |
| 25            | 6             | 0           | -1.007222               | 3.324006  | 1.709182  |
| 26            | 1             | 0           | -1.672212               | 4.192246  | 1.665381  |
| 27            | 1             | 0           | -0.311520               | 3.479276  | 2.533080  |
| 28            | 6             | 0           | -1.840581               | 2.061326  | 1.993658  |
| 29            | 1             | 0           | -1.166787               | 1.233571  | 2.224311  |
| 30            | 6             | 0           | -2.763896               | 2.288381  | 3.182952  |
| 31            | 8             | 0           | -2.067398               | 2.387911  | 4.333208  |
| 32            | 8             | 0           | -3.963321               | 2.387307  | 3.113200  |
| 33            | 7             | 0           | -2.625358               | 1.682331  | 0.795792  |

|    |    |   |           |           |           |
|----|----|---|-----------|-----------|-----------|
| 34 | 1  | 0 | -3.204006 | 0.867896  | 0.990163  |
| 35 | 1  | 0 | -3.272347 | 2.432835  | 0.557121  |
| 36 | 1  | 0 | 2.840082  | -4.404288 | 3.125802  |
| 37 | 1  | 0 | -2.696398 | 2.555759  | 5.051893  |
| 38 | 1  | 0 | 2.408985  | 1.251593  | -1.277647 |
| 39 | 7  | 0 | 2.650406  | 2.066303  | -0.674062 |
| 40 | 6  | 0 | 3.705443  | 1.631637  | 0.275785  |
| 41 | 6  | 0 | 3.437169  | 0.187318  | 0.736505  |
| 42 | 1  | 0 | 3.689922  | 2.310505  | 1.135837  |
| 43 | 6  | 0 | 5.050788  | 1.831214  | -0.417388 |
| 44 | 16 | 0 | 3.135477  | -0.921897 | -0.708962 |
| 45 | 1  | 0 | 2.577084  | 0.181063  | 1.405463  |
| 46 | 1  | 0 | 4.306264  | -0.156758 | 1.296095  |
| 47 | 8  | 0 | 6.053680  | 1.269032  | 0.270470  |
| 48 | 8  | 0 | 5.193620  | 2.465849  | -1.432286 |
| 49 | 1  | 0 | 2.985357  | 2.818593  | -1.279854 |
| 50 | 17 | 0 | 0.317329  | 0.494625  | -2.352055 |
| 51 | 1  | 0 | 1.761425  | 2.380351  | -0.184868 |
| 52 | 1  | 0 | 6.879534  | 1.435993  | -0.209391 |

HF=-2731.5334622\ZeroPoint=0.3624407\Thermal=0.3958952

### B1-CI-3

| Center Number | Atomic Number | Atomic Type | Coordinates (Angstroms) |           |           |
|---------------|---------------|-------------|-------------------------|-----------|-----------|
|               |               |             | X                       | Y         | Z         |
| 1             | 46            | 0           | -1.463896               | 0.230697  | -0.277694 |
| 2             | 46            | 0           | 1.841875                | 0.235168  | -0.198102 |
| 3             | 7             | 0           | -0.690423               | -0.349759 | 1.616976  |
| 4             | 7             | 0           | -1.380559               | -1.190121 | 2.265283  |
| 5             | 6             | 0           | -2.463815               | -1.676504 | 1.545819  |
| 6             | 6             | 0           | -2.789366               | -1.115553 | 0.282090  |
| 7             | 6             | 0           | -3.900358               | -1.605622 | -0.393588 |
| 8             | 1             | 0           | -4.181020               | -1.196127 | -1.356676 |
| 9             | 6             | 0           | -4.664164               | -2.634559 | 0.167794  |
| 10            | 6             | 0           | -4.339350               | -3.181894 | 1.412696  |
| 11            | 1             | 0           | -4.945619               | -3.975376 | 1.833372  |
| 12            | 6             | 0           | -3.240387               | -2.699147 | 2.109477  |
| 13            | 1             | 0           | -2.964045               | -3.091316 | 3.081273  |
| 14            | 6             | 0           | 0.314201                | 0.347321  | 2.358511  |
| 15            | 6             | 0           | 1.505961                | 0.745789  | 1.715004  |
| 16            | 6             | 0           | 2.435367                | 1.469894  | 2.478496  |
| 17            | 1             | 0           | 3.381198                | 1.750195  | 2.029761  |
| 18            | 6             | 0           | 2.181555                | 1.814396  | 3.808187  |
| 19            | 1             | 0           | 2.915082                | 2.386696  | 4.365763  |
| 20            | 6             | 0           | 0.993203                | 1.414589  | 4.418505  |
| 21            | 1             | 0           | 0.789801                | 1.678993  | 5.449798  |
| 22            | 6             | 0           | 0.062008                | 0.678393  | 3.697326  |
| 23            | 1             | 0           | -0.870863               | 0.364245  | 4.148067  |
| 24            | 16            | 0           | 3.370364                | -1.315892 | 0.511141  |
| 25            | 6             | 0           | 3.956648                | -1.821005 | -1.168808 |
| 26            | 1             | 0           | 4.406539                | -2.810723 | -1.081663 |
| 27            | 1             | 0           | 4.721453                | -1.127213 | -1.529767 |
| 28            | 6             | 0           | 2.811171                | -1.859570 | -2.178684 |
| 29            | 1             | 0           | 3.204937                | -2.147880 | -3.164700 |
| 30            | 6             | 0           | 1.734889                | -2.889036 | -1.845905 |
| 31            | 8             | 0           | 0.551799                | -2.673729 | -1.902535 |

|    |    |   |           |           |           |
|----|----|---|-----------|-----------|-----------|
| 32 | 8  | 0 | 2.269529  | -4.088073 | -1.553074 |
| 33 | 7  | 0 | 2.155750  | -0.528102 | -2.244684 |
| 34 | 1  | 0 | 2.714669  | 0.106614  | -2.808094 |
| 35 | 1  | 0 | 1.236133  | -0.615453 | -2.676871 |
| 36 | 16 | 0 | -2.733425 | 1.078085  | -2.030470 |
| 37 | 6  | 0 | -1.746613 | 2.542204  | -2.568415 |
| 38 | 1  | 0 | -0.902609 | 2.220954  | -3.185153 |
| 39 | 1  | 0 | -2.407271 | 3.149012  | -3.188574 |
| 40 | 6  | 0 | -1.231803 | 3.435672  | -1.436158 |
| 41 | 1  | 0 | -2.062088 | 3.728356  | -0.790007 |
| 42 | 7  | 0 | -0.617880 | 4.654337  | -1.977673 |
| 43 | 1  | 0 | -0.320225 | 5.288196  | -1.243873 |
| 44 | 6  | 0 | -0.221558 | 2.684982  | -0.573614 |
| 45 | 8  | 0 | 0.299782  | 1.621692  | -0.959481 |
| 46 | 8  | 0 | 0.138459  | 3.288937  | 0.537597  |
| 47 | 1  | 0 | -5.525510 | -3.009510 | -0.374978 |
| 48 | 1  | 0 | 1.540227  | -4.692148 | -1.347386 |
| 49 | 1  | 0 | 0.181105  | 4.441367  | -2.566713 |
| 50 | 1  | 0 | 0.779764  | 2.729023  | 1.030525  |

|    |    |   |           |           |           |
|----|----|---|-----------|-----------|-----------|
| 32 | 8  | 0 | 5.759726  | -1.449466 | -2.699527 |
| 33 | 7  | 0 | 3.232018  | -0.792648 | -0.164650 |
| 34 | 1  | 0 | 2.975688  | -1.767800 | -0.023603 |
| 35 | 1  | 0 | 3.904648  | -0.583344 | 0.574245  |
| 36 | 16 | 0 | -3.201296 | 2.085982  | -0.801988 |
| 37 | 6  | 0 | -2.072158 | 3.485475  | -0.401584 |
| 38 | 1  | 0 | -1.253062 | 3.522502  | -1.123652 |
| 39 | 1  | 0 | -2.658732 | 4.399270  | -0.504009 |
| 40 | 6  | 0 | -1.499762 | 3.462939  | 1.017961  |
| 41 | 1  | 0 | -2.306850 | 3.414749  | 1.751353  |
| 42 | 7  | 0 | -0.706756 | 4.672292  | 1.268156  |
| 43 | 1  | 0 | -0.353631 | 4.714300  | 2.217860  |
| 44 | 6  | 0 | -0.602283 | 2.251064  | 1.222360  |
| 45 | 8  | 0 | -0.130586 | 1.636202  | 0.241980  |
| 46 | 8  | 0 | -0.253220 | 1.978497  | 2.456684  |
| 47 | 1  | 0 | -5.870985 | -1.906896 | -2.847966 |
| 48 | 1  | 0 | 6.639122  | -1.851518 | -2.624744 |
| 49 | 1  | 0 | 0.073024  | 4.749785  | 0.621963  |
| 50 | 1  | 0 | 0.328978  | 1.184213  | 2.462606  |

HF=-2270.6473927\ZeroPoint=0.3521741\Thermal=0.3831045

HF=-2270.6342739\ZeroPoint=0.352536\Thermal=0.3835132

#### B1-CI-4

| Center Number | Atomic Number | Atomic Type | Coordinates (Angstroms) |           |           |
|---------------|---------------|-------------|-------------------------|-----------|-----------|
|               |               |             | X                       | Y         | Z         |
| 1             | 46            | 0           | -1.903617               | 0.242614  | -0.262887 |
| 2             | 46            | 0           | 1.558425                | 0.393594  | 0.094423  |
| 3             | 7             | 0           | -1.121630               | -1.541593 | 0.586044  |
| 4             | 7             | 0           | -1.781670               | -2.599257 | 0.347564  |
| 5             | 6             | 0           | -2.840522               | -2.403581 | -0.524036 |
| 6             | 6             | 0           | -3.191536               | -1.088847 | -0.933639 |
| 7             | 6             | 0           | -4.292124               | -0.930547 | -1.769272 |
| 8             | 1             | 0           | -4.589234               | 0.057031  | -2.100630 |
| 9             | 6             | 0           | -5.017974               | -2.048525 | -2.192697 |
| 10            | 6             | 0           | -4.665870               | -3.340053 | -1.786374 |
| 11            | 1             | 0           | -5.243019               | -4.192972 | -2.123181 |
| 12            | 6             | 0           | -3.579068               | -3.521070 | -0.944077 |
| 13            | 1             | 0           | -3.284839               | -4.504498 | -0.596312 |
| 14            | 6             | 0           | -0.181264               | -1.629121 | 1.661993  |
| 15            | 6             | 0           | 0.964854                | -0.806395 | 1.666385  |
| 16            | 6             | 0           | 1.812064                | -0.916751 | 2.784445  |
| 17            | 1             | 0           | 2.711684                | -0.308210 | 2.833671  |
| 18            | 6             | 0           | 1.539537                | -1.776760 | 3.850059  |
| 19            | 1             | 0           | 2.211403                | -1.817657 | 4.700680  |
| 20            | 6             | 0           | 0.395938                | -2.573244 | 3.816989  |
| 21            | 1             | 0           | 0.166196                | -3.239427 | 4.640580  |
| 22            | 6             | 0           | -0.461785               | -2.499652 | 2.727899  |
| 23            | 1             | 0           | -1.361915               | -3.099559 | 2.690658  |
| 24            | 16            | 0           | 2.402957                | 1.705295  | -1.707038 |
| 25            | 6             | 0           | 4.047839                | 0.883564  | -1.781141 |
| 26            | 1             | 0           | 4.740424                | 1.328973  | -1.058557 |
| 27            | 1             | 0           | 4.470593                | 1.010505  | -2.778404 |
| 28            | 6             | 0           | 3.901982                | -0.613551 | -1.483604 |
| 29            | 1             | 0           | 3.268708                | -1.064339 | -2.249318 |
| 30            | 6             | 0           | 5.256577                | -1.306243 | -1.460424 |
| 31            | 8             | 0           | 5.829538                | -1.654596 | -0.456228 |

#### M1-Ala<sup>2D</sup>-1

| Center Number | Atomic Number | Atomic Type | Coordinates (Angstroms) |           |           |
|---------------|---------------|-------------|-------------------------|-----------|-----------|
|               |               |             | X                       | Y         | Z         |
| 1             | 46            | 0           | 0.640961                | -0.037753 | -0.060068 |
| 2             | 7             | 0           | -1.381520               | 0.548073  | -0.014424 |
| 3             | 7             | 0           | -1.600533               | 1.794884  | 0.024446  |
| 4             | 6             | 0           | -0.455878               | 2.572976  | 0.018417  |
| 5             | 6             | 0           | 0.809581                | 1.933890  | -0.021613 |
| 6             | 6             | 0           | 1.936213                | 2.751914  | -0.041945 |
| 7             | 1             | 0           | 2.934632                | 2.326863  | -0.086622 |
| 8             | 6             | 0           | 1.811471                | 4.147109  | -0.015033 |
| 9             | 6             | 0           | 0.555363                | 4.756090  | 0.031289  |
| 10            | 1             | 0           | 0.474206                | 5.836150  | 0.052206  |
| 11            | 6             | 0           | -0.588658               | 3.967401  | 0.046438  |
| 12            | 1             | 0           | -1.579689               | 4.404708  | 0.077450  |
| 13            | 6             | 0           | -2.539737               | -0.288054 | 0.000505  |
| 14            | 6             | 0           | -3.828163               | 0.259159  | 0.138612  |
| 15            | 6             | 0           | -4.930646               | -0.580506 | 0.144678  |
| 16            | 1             | 0           | -5.922989               | -0.157714 | 0.253035  |
| 17            | 6             | 0           | -4.768866               | -1.964305 | 0.014701  |
| 18            | 1             | 0           | -5.636204               | -2.614730 | 0.021053  |
| 19            | 6             | 0           | -3.491768               | -2.499969 | -0.118732 |
| 20            | 1             | 0           | -3.354339               | -3.570382 | -0.216810 |
| 21            | 6             | 0           | -2.371358               | -1.670716 | -0.124839 |
| 22            | 1             | 0           | -1.381491               | -2.099002 | -0.220239 |
| 23            | 6             | 0           | 1.698770                | -2.786248 | 0.061250  |
| 24            | 6             | 0           | 2.905501                | -1.881500 | 0.446325  |
| 25            | 1             | 0           | 2.871591                | -1.800841 | 1.537211  |
| 26            | 7             | 0           | 2.679074                | -0.491945 | -0.073900 |
| 27            | 1             | 0           | 2.985579                | -0.438135 | -1.044679 |
| 28            | 6             | 0           | 4.246001                | -2.449632 | 0.002640  |
| 29            | 1             | 0           | 2.704881                | 4.762453  | -0.032030 |
| 30            | 1             | 0           | 3.236417                | 0.180747  | 0.445610  |
| 31            | 1             | 0           | -3.944958               | 1.328713  | 0.239474  |

|                                                        |        |        |                         |           |           |    |    |   |           |           |           |
|--------------------------------------------------------|--------|--------|-------------------------|-----------|-----------|----|----|---|-----------|-----------|-----------|
| 32                                                     | 8      | 0      | 0.589897                | -2.152362 | -0.147770 | 2  | 7  | 0 | 0.474441  | -0.436344 | 0.096750  |
| 33                                                     | 8      | 0      | 1.859565                | -3.993893 | 0.025957  | 3  | 7  | 0 | -0.474441 | 0.436344  | 0.096752  |
| 34                                                     | 1      | 0      | 5.080743                | -1.844844 | 0.369881  | 4  | 6  | 0 | -0.047016 | 1.767394  | 0.102664  |
| 35                                                     | 1      | 0      | 4.345010                | -3.466512 | 0.382352  | 5  | 6  | 0 | 1.353507  | 1.987921  | 0.098845  |
| 36                                                     | 1      | 0      | 4.300599                | -2.503519 | -1.089272 | 6  | 6  | 0 | 1.795460  | 3.305853  | 0.129434  |
| -----                                                  |        |        |                         |           |           |    |    |   |           |           |           |
| HF=-1023.5703307\ZeroPoint=0.2725365\Thermal=0.2916972 |        |        |                         |           |           |    |    |   |           |           |           |
| <b>M1-Ala<sup>2D</sup>-2</b>                           |        |        |                         |           |           |    |    |   |           |           |           |
| -----                                                  |        |        |                         |           |           |    |    |   |           |           |           |
| Center                                                 | Atomic | Atomic | Coordinates (Angstroms) |           |           |    |    |   |           |           |           |
| Number                                                 | Number | Type   | X                       | Y         | Z         |    |    |   |           |           |           |
| -----                                                  |        |        |                         |           |           |    |    |   |           |           |           |
| 1                                                      | 46     | 0      | -0.579164               | -0.172982 | -0.132905 | 7  | 1  | 0 | 2.855884  | 3.537836  | 0.144686  |
| 2                                                      | 7      | 0      | 1.182718                | 0.899448  | -0.097196 | 8  | 6  | 0 | 0.882842  | 4.368116  | 0.152226  |
| 3                                                      | 7      | 0      | 1.113361                | 2.163427  | 0.009096  | 9  | 6  | 0 | -0.490768 | 4.125632  | 0.146136  |
| 4                                                      | 6      | 0      | -0.189593               | 2.630114  | 0.001935  | 10 | 1  | 0 | -1.191704 | 4.951294  | 0.162265  |
| 5                                                      | 6      | 0      | -1.240112               | 1.682922  | -0.082212 | 11 | 6  | 0 | -0.971690 | 2.821858  | 0.123654  |
| 6                                                      | 6      | 0      | -2.551045               | 2.138278  | -0.087578 | 12 | 1  | 0 | -2.036813 | 2.621956  | 0.122499  |
| 7                                                      | 1      | 0      | -3.364071               | 1.422991  | -0.142217 | 13 | 6  | 0 | 0.047016  | -1.767394 | 0.102663  |
| 8                                                      | 6      | 0      | -2.802475               | 3.514336  | -0.020460 | 14 | 6  | 0 | 0.971690  | -2.821858 | 0.123650  |
| 9                                                      | 6      | 0      | -1.758356               | 4.445307  | 0.059886  | 15 | 6  | 0 | 0.490768  | -4.125633 | 0.146133  |
| 10                                                     | 1      | 0      | -1.980637               | 5.504423  | 0.112585  | 16 | 1  | 0 | 1.191704  | -4.951294 | 0.162259  |
| 11                                                     | 6      | 0      | -0.440529               | 4.008919  | 0.073459  | 17 | 6  | 0 | -0.882842 | -4.368116 | 0.152228  |
| 12                                                     | 1      | 0      | 0.389903                | 4.702310  | 0.137875  | 18 | 1  | 0 | -1.251046 | -5.388347 | 0.176056  |
| 13                                                     | 6      | 0      | 2.490937                | 0.338074  | -0.048392 | 19 | 6  | 0 | -1.795460 | -3.305853 | 0.129439  |
| 14                                                     | 6      | 0      | 2.767106                | -0.780084 | -0.840041 | 20 | 1  | 0 | -2.855884 | -3.537836 | 0.144696  |
| 15                                                     | 6      | 0      | 4.033789                | -1.355462 | -0.806290 | 21 | 6  | 0 | -1.353507 | -1.987921 | 0.098849  |
| 16                                                     | 1      | 0      | 4.253193                | -2.209524 | -1.436582 | 22 | 6  | 0 | 6.726750  | 0.522944  | -0.195537 |
| 17                                                     | 6      | 0      | 5.019717                | -0.829112 | 0.028366  | 23 | 1  | 0 | 7.022089  | 1.512636  | -0.556716 |
| 18                                                     | 1      | 0      | 6.002631                | -1.284263 | 0.061901  | 24 | 1  | 0 | 7.392977  | -0.227677 | -0.620638 |
| 19                                                     | 6      | 0      | 4.737465                | 0.285573  | 0.819709  | 25 | 6  | 0 | 5.292880  | 0.190930  | -0.582750 |
| 20                                                     | 1      | 0      | 5.500516                | 0.694635  | 1.471808  | 26 | 1  | 0 | 5.169036  | 0.258131  | -1.668031 |
| 21                                                     | 6      | 0      | 3.478740                | 0.875609  | 0.783188  | 27 | 7  | 0 | 4.309069  | 1.163610  | 0.001776  |
| 22                                                     | 1      | 0      | 3.244397                | 1.738648  | 1.392436  | 28 | 1  | 0 | 4.330944  | 2.043685  | -0.506372 |
| 23                                                     | 6      | 0      | -2.542050               | -2.269788 | 0.179545  | 29 | 6  | 0 | 4.877788  | -1.261569 | -0.209391 |
| 24                                                     | 6      | 0      | -1.218112               | -3.000667 | 0.545251  | 30 | 8  | 0 | 5.722575  | -2.138841 | -0.236181 |
| 25                                                     | 1      | 0      | -1.095387               | -2.844314 | 1.622192  | 31 | 8  | 0 | 3.619865  | -1.415535 | 0.058779  |
| 26                                                     | 7      | 0      | -0.060525               | -2.312056 | -0.104358 | 32 | 1  | 0 | 1.251046  | 5.388347  | 0.176053  |
| 27                                                     | 1      | 0      | 0.024176                | -2.640572 | -1.065022 | 33 | 1  | 0 | 4.571384  | 1.375536  | 0.963938  |
| 28                                                     | 6      | 0      | -1.267877               | -4.492473 | 0.240604  | 34 | 1  | 0 | 2.036813  | -2.621956 | 0.122491  |
| 29                                                     | 1      | 0      | -3.828537               | 3.867270  | -0.029514 | 35 | 46 | 0 | -2.406135 | -0.314786 | 0.065846  |
| 30                                                     | 1      | 0      | 0.812082                | -2.553125 | 0.358621  | 36 | 6  | 0 | -6.726751 | -0.522946 | -0.195570 |
| 31                                                     | 1      | 0      | 2.000848                | -1.160168 | -1.504042 | 37 | 1  | 0 | -7.022080 | -1.512639 | -0.556755 |
| 32                                                     | 8      | 0      | -2.433580               | -1.001416 | -0.101797 | 38 | 1  | 0 | -7.392970 | 0.227673  | -0.620686 |
| 33                                                     | 8      | 0      | -3.591425               | -2.884837 | 0.216602  | 39 | 6  | 0 | -5.292873 | -0.190931 | -0.582755 |
| 34                                                     | 1      | 0      | -0.363697               | -4.997625 | 0.593543  | 40 | 1  | 0 | -5.169007 | -0.258132 | -1.668034 |
| 35                                                     | 1      | 0      | -2.138718               | -4.936192 | 0.722880  | 41 | 7  | 0 | -4.309071 | -1.163607 | 0.001791  |
| 36                                                     | 1      | 0      | -1.369616               | -4.662315 | -0.835890 | 42 | 6  | 0 | -4.877788 | 1.261568  | -0.209388 |
| -----                                                  |        |        |                         |           |           |    |    |   |           |           |           |
| HF=-1474.216851\ZeroPoint=0.3548273\Thermal=0.3823989  |        |        |                         |           |           |    |    |   |           |           |           |
| <b>D1-Ala<sup>2D</sup>-1</b>                           |        |        |                         |           |           |    |    |   |           |           |           |
| -----                                                  |        |        |                         |           |           |    |    |   |           |           |           |
| Center                                                 | Atomic | Atomic | Coordinates (Angstroms) |           |           |    |    |   |           |           |           |
| Number                                                 | Number | Type   | X                       | Y         | Z         |    |    |   |           |           |           |
| -----                                                  |        |        |                         |           |           |    |    |   |           |           |           |
| 1                                                      | 46     | 0      | 2.406135                | 0.314786  | 0.065837  | 1  | 46 | 0 | 2.396835  | 0.204846  | -0.163885 |
|                                                        |        |        |                         |           |           | 2  | 7  | 0 | 0.458722  | -0.457136 | -0.462199 |
|                                                        |        |        |                         |           |           | 3  | 7  | 0 | -0.458723 | 0.457136  | -0.462200 |

|    |    |   |           |           |           |    |   |   |           |           |           |
|----|----|---|-----------|-----------|-----------|----|---|---|-----------|-----------|-----------|
| 4  | 6  | 0 | 0.042509  | 1.759845  | -0.507436 | 6  | 6 | 0 | -2.784088 | -0.487126 | 0.630704  |
| 5  | 6  | 0 | 1.439982  | 1.908065  | -0.390456 | 7  | 6 | 0 | -3.608578 | -1.524997 | 1.049983  |
| 6  | 6  | 0 | 1.989554  | 3.183552  | -0.427627 | 8  | 1 | 0 | -3.348530 | -2.556477 | 0.836079  |
| 7  | 1  | 0 | 3.061446  | 3.300756  | -0.317031 | 9  | 6 | 0 | -4.787412 | -1.255089 | 1.757514  |
| 8  | 6  | 0 | 1.157007  | 4.290664  | -0.615077 | 10 | 6 | 0 | -5.162847 | 0.056379  | 2.058431  |
| 9  | 6  | 0 | -0.225215 | 4.132831  | -0.772976 | 11 | 1 | 0 | -6.078092 | 0.247523  | 2.605653  |
| 10 | 1  | 0 | -0.853634 | 4.998065  | -0.947545 | 12 | 6 | 0 | -4.354386 | 1.114571  | 1.658504  |
| 11 | 6  | 0 | -0.791946 | 2.867129  | -0.719079 | 13 | 1 | 0 | -4.613110 | 2.142707  | 1.883008  |
| 12 | 1  | 0 | -1.850240 | 2.727784  | -0.884378 | 14 | 6 | 0 | -0.352837 | 2.490036  | -0.425915 |
| 13 | 6  | 0 | -0.042509 | -1.759845 | -0.507435 | 15 | 6 | 0 | 1.011083  | 2.124308  | -0.487536 |
| 14 | 6  | 0 | 0.791946  | -2.867130 | -0.719077 | 16 | 6 | 0 | 1.926127  | 3.135062  | -0.807717 |
| 15 | 6  | 0 | 0.225215  | -4.132832 | -0.772974 | 17 | 1 | 0 | 2.983215  | 2.897739  | -0.870425 |
| 16 | 1  | 0 | 0.853634  | -4.998066 | -0.947543 | 18 | 6 | 0 | 1.511917  | 4.437319  | -1.085691 |
| 17 | 6  | 0 | -1.157007 | -4.290664 | -0.615076 | 19 | 1 | 0 | 2.245351  | 5.189635  | -1.355702 |
| 18 | 1  | 0 | -1.589468 | -5.284597 | -0.652503 | 20 | 6 | 0 | 0.156471  | 4.770061  | -1.033950 |
| 19 | 6  | 0 | -1.989555 | -3.183553 | -0.427627 | 21 | 1 | 0 | -0.170254 | 5.778052  | -1.261154 |
| 20 | 1  | 0 | -3.061446 | -3.300756 | -0.317032 | 22 | 6 | 0 | -0.775420 | 3.800113  | -0.697940 |
| 21 | 6  | 0 | -1.439983 | -1.908065 | -0.390456 | 23 | 1 | 0 | -1.831380 | 4.033707  | -0.648380 |
| 22 | 6  | 0 | 6.044271  | -1.883284 | 1.149962  | 24 | 6 | 0 | 3.623315  | -0.516390 | 3.619906  |
| 23 | 1  | 0 | 5.800885  | -2.872102 | 1.549696  | 25 | 1 | 0 | 4.204341  | 0.367130  | 3.900817  |
| 24 | 1  | 0 | 6.822039  | -1.429891 | 1.764313  | 26 | 1 | 0 | 2.694817  | -0.530435 | 4.198483  |
| 25 | 6  | 0 | 4.817164  | -0.981218 | 1.130766  | 27 | 6 | 0 | 3.326879  | -0.532988 | 2.127981  |
| 26 | 1  | 0 | 4.405570  | -0.889412 | 2.141507  | 28 | 1 | 0 | 4.258101  | -0.497020 | 1.554173  |
| 27 | 7  | 0 | 3.708434  | -1.523836 | 0.284781  | 29 | 6 | 0 | 2.606693  | -1.837496 | 1.658114  |
| 28 | 1  | 0 | 3.270780  | -2.314327 | 0.750596  | 30 | 8 | 0 | 1.986531  | -1.734233 | 0.523852  |
| 29 | 6  | 0 | 5.147504  | 0.471092  | 0.696988  | 31 | 8 | 0 | 2.698402  | -2.846875 | 2.335460  |
| 30 | 8  | 0 | 6.253288  | 0.928349  | 0.910261  | 32 | 7 | 0 | 2.539133  | 0.676873  | 1.700864  |
| 31 | 8  | 0 | 4.162759  | 1.138986  | 0.158365  | 33 | 1 | 0 | 1.806110  | 0.868341  | 2.382212  |
| 32 | 1  | 0 | 1.589468  | 5.284597  | -0.652504 | 34 | 1 | 0 | 3.127583  | 1.506333  | 1.671874  |
| 33 | 1  | 0 | 4.102113  | -1.881615 | -0.584639 | 35 | 6 | 0 | -1.064069 | -2.956859 | -3.046012 |
| 34 | 1  | 0 | 1.850239  | -2.727784 | -0.884376 | 36 | 1 | 0 | -1.714993 | -2.080710 | -3.106927 |
| 35 | 46 | 0 | -2.396835 | -0.204846 | -0.163886 | 37 | 1 | 0 | -1.679526 | -2.833567 | -2.822310 |
| 36 | 6  | 0 | -6.044269 | 1.883285  | 1.149966  | 38 | 6 | 0 | 0.010466  | -2.761257 | -1.976502 |
| 37 | 1  | 0 | -5.800881 | 2.872102  | 1.549700  | 39 | 1 | 0 | 0.656925  | -3.640742 | -1.929555 |
| 38 | 1  | 0 | -6.822036 | 1.429892  | 1.764317  | 40 | 7 | 0 | -0.612878 | -2.529273 | -0.637478 |
| 39 | 6  | 0 | -4.817162 | 0.981218  | 1.130767  | 41 | 6 | 0 | 0.914661  | -1.568113 | -2.343733 |
| 40 | 1  | 0 | -4.405568 | 0.889410  | 2.141507  | 42 | 8 | 0 | 0.558727  | -0.412230 | -1.777078 |
| 41 | 7  | 0 | -3.708433 | 1.523836  | 0.284781  | 43 | 8 | 0 | 1.818802  | -1.694435 | -3.129809 |
| 42 | 6  | 0 | -5.147504 | -0.471091 | 0.696988  | 44 | 1 | 0 | -5.416722 | -2.078825 | 2.077519  |
| 43 | 1  | 0 | -3.270779 | 2.314327  | 0.750597  | 45 | 1 | 0 | -1.327356 | -3.227072 | -0.449659 |
| 44 | 1  | 0 | -4.102113 | 1.881615  | -0.584639 | 46 | 1 | 0 | 0.125275  | -2.616478 | 0.072869  |
| 45 | 8  | 0 | -6.253288 | -0.928349 | 0.910260  | 47 | 1 | 0 | 4.182743  | -1.412857 | 3.886851  |
| 46 | 8  | 0 | -4.162760 | -1.138986 | 0.158363  | 48 | 1 | 0 | -0.590065 | -3.109759 | -4.016374 |
| 47 | 1  | 0 | -6.452308 | 2.000468  | 0.141227  |    |   |   |           |           |           |
| 48 | 1  | 0 | 6.452309  | -2.000466 | 0.141223  |    |   |   |           |           |           |

HF=-1474.2054708\ZeroPoint=0.3540788\Thermal=0.3815395

HF=-1474.2066117\ZeroPoint=0.3544037\Thermal=0.3820808 **B1-Ala<sup>2D</sup>-1-2**

**B1-Ala<sup>2D</sup>-1-1**

| Center Number | Atomic Number | Atomic Type | Coordinates (Angstroms) |           |           |
|---------------|---------------|-------------|-------------------------|-----------|-----------|
|               |               |             | X                       | Y         | Z         |
| 1             | 46            | 0           | -1.134035               | -0.492583 | -0.447849 |
| 2             | 46            | 0           | 1.613655                | 0.258406  | -0.096411 |
| 3             | 7             | 0           | -1.328084               | 1.508545  | -0.060528 |
| 4             | 7             | 0           | -2.340605               | 1.893584  | 0.592460  |
| 5             | 6             | 0           | -3.177910               | 0.842299  | 0.950579  |

| Center Number | Atomic Number | Atomic Type | Coordinates (Angstroms) |           |           |
|---------------|---------------|-------------|-------------------------|-----------|-----------|
|               |               |             | X                       | Y         | Z         |
| 1             | 46            | 0           | 1.615159                | -0.635727 | 0.143517  |
| 2             | 46            | 0           | -1.799369               | 0.073641  | 0.078883  |
| 3             | 7             | 0           | 1.416769                | 1.399607  | 0.011318  |
| 4             | 7             | 0           | 2.355035                | 2.039416  | -0.549412 |
| 5             | 6             | 0           | 3.381174                | 1.221060  | -1.005712 |
| 6             | 6             | 0           | 3.313817                | -0.169916 | -0.737318 |
| 7             | 6             | 0           | 4.368144                | -0.970450 | -1.158795 |

|    |   |   |           |           |           |    |   |   |           |           |           |
|----|---|---|-----------|-----------|-----------|----|---|---|-----------|-----------|-----------|
| 8  | 1 | 0 | 4.363067  | -2.041162 | -0.976566 | 10 | 6 | 0 | -5.297115 | -1.109071 | 1.772062  |
| 9  | 6 | 0 | 5.456085  | -0.407635 | -1.841925 | 11 | 1 | 0 | -6.249457 | -1.143715 | 2.287747  |
| 10 | 6 | 0 | 5.505526  | 0.962001  | -2.104020 | 12 | 6 | 0 | -4.715716 | 0.114351  | 1.463017  |
| 11 | 1 | 0 | 6.352474  | 1.383242  | -2.632127 | 13 | 1 | 0 | -5.190329 | 1.052068  | 1.727766  |
| 12 | 6 | 0 | 4.466677  | 1.786680  | -1.681632 | 14 | 6 | 0 | -0.999064 | 2.372261  | -0.376581 |
| 13 | 1 | 0 | 4.481775  | 2.855305  | -1.860227 | 15 | 6 | 0 | 0.411303  | 2.286904  | -0.380646 |
| 14 | 6 | 0 | 0.430569  | 2.163720  | 0.699260  | 16 | 6 | 0 | 1.104886  | 3.491152  | -0.591637 |
| 15 | 6 | 0 | -0.904444 | 1.720631  | 0.816902  | 17 | 1 | 0 | 2.190379  | 3.483080  | -0.599151 |
| 16 | 6 | 0 | -1.787397 | 2.581917  | 1.492744  | 18 | 6 | 0 | 0.445334  | 4.697569  | -0.819926 |
| 17 | 1 | 0 | -2.836476 | 2.318375  | 1.543235  | 19 | 1 | 0 | 1.018811  | 5.600520  | -1.001962 |
| 18 | 6 | 0 | -1.368419 | 3.775344  | 2.067947  | 20 | 6 | 0 | -0.951062 | 4.743212  | -0.827919 |
| 19 | 1 | 0 | -2.083962 | 4.397363  | 2.595160  | 21 | 1 | 0 | -1.469928 | 5.676435  | -1.013921 |
| 20 | 6 | 0 | -0.031989 | 4.176112  | 1.965503  | 22 | 6 | 0 | -1.674008 | 3.583178  | -0.597529 |
| 21 | 1 | 0 | 0.305022  | 5.100291  | 2.420580  | 23 | 1 | 0 | -2.756481 | 3.593850  | -0.585178 |
| 22 | 6 | 0 | 0.859533  | 3.380558  | 1.274379  | 24 | 6 | 0 | 3.646947  | 0.081465  | 3.628642  |
| 23 | 1 | 0 | 1.897744  | 3.668227  | 1.174198  | 25 | 1 | 0 | 3.907207  | 1.060245  | 4.043156  |
| 24 | 6 | 0 | -5.280801 | -1.584862 | -1.953260 | 26 | 1 | 0 | 2.772756  | -0.305988 | 4.161149  |
| 25 | 1 | 0 | -5.103223 | -2.615192 | -2.275790 | 27 | 6 | 0 | 3.367595  | 0.169451  | 2.134317  |
| 26 | 1 | 0 | -5.859424 | -1.603691 | -1.024549 | 28 | 1 | 0 | 4.238782  | 0.581340  | 1.614420  |
| 27 | 6 | 0 | -3.966284 | -0.841144 | -1.747701 | 29 | 6 | 0 | 3.134317  | -1.227908 | 1.475286  |
| 28 | 1 | 0 | -3.386796 | -0.849251 | -2.677282 | 30 | 8 | 0 | 2.412534  | -1.218778 | 0.401644  |
| 29 | 6 | 0 | -4.179073 | 0.664710  | -1.430010 | 31 | 8 | 0 | 3.677770  | -2.205296 | 1.965669  |
| 30 | 8 | 0 | -3.261934 | 1.239752  | -0.700383 | 32 | 7 | 0 | 2.230755  | 1.098152  | 1.823946  |
| 31 | 8 | 0 | -5.141745 | 1.244819  | -1.898333 | 33 | 1 | 0 | 1.483120  | 0.961955  | 2.502540  |
| 32 | 7 | 0 | -3.099100 | -1.466721 | -0.712927 | 34 | 1 | 0 | 2.518603  | 2.069813  | 1.908281  |
| 33 | 1 | 0 | -3.644649 | -1.783278 | 0.086415  | 35 | 6 | 0 | 2.638681  | -1.289877 | -2.714195 |
| 34 | 1 | 0 | -2.631574 | -2.298819 | -1.058832 | 36 | 1 | 0 | 3.221650  | -1.224559 | -1.797380 |
| 35 | 6 | 0 | 1.279698  | -3.040932 | 2.782703  | 37 | 1 | 0 | 2.816324  | -0.399833 | -3.321744 |
| 36 | 1 | 0 | 1.469520  | -1.984812 | 2.987051  | 38 | 6 | 0 | 1.146264  | -1.371200 | -2.383852 |
| 37 | 1 | 0 | 2.190559  | -3.612205 | 2.985905  | 39 | 1 | 0 | 0.596449  | -1.554695 | -3.322901 |
| 38 | 6 | 0 | 0.827089  | -3.235554 | 1.335680  | 40 | 7 | 0 | 0.563300  | -0.175592 | -1.754880 |
| 39 | 1 | 0 | 0.637534  | -4.292989 | 1.140401  | 41 | 6 | 0 | 0.751532  | -2.569909 | -1.543818 |
| 40 | 7 | 0 | 1.878022  | -2.723032 | 0.394888  | 42 | 8 | 0 | -0.292711 | -2.604257 | -0.884398 |
| 41 | 6 | 0 | -0.494345 | -2.476900 | 1.091891  | 43 | 8 | 0 | 1.536385  | -3.625499 | -1.632820 |
| 42 | 8 | 0 | -0.318171 | -1.194721 | 0.878053  | 44 | 1 | 0 | -5.103325 | -3.249173 | 1.675004  |
| 43 | 8 | 0 | -1.561452 | -3.057138 | 1.136348  | 45 | 1 | 0 | 0.436925  | 0.545476  | -2.456455 |
| 44 | 1 | 0 | 6.267357  | -1.047423 | -2.172384 | 46 | 1 | 0 | 4.467907  | -0.613574 | 3.803874  |
| 45 | 1 | 0 | 2.807412  | -2.949973 | 0.740993  | 47 | 1 | 0 | 2.959116  | -2.168491 | -3.278200 |
| 46 | 1 | 0 | 1.785679  | -3.165338 | -0.517141 | 48 | 1 | 0 | 1.215550  | -4.306289 | -1.020199 |
| 47 | 1 | 0 | -5.881207 | -1.069928 | -2.703282 |    |   |   |           |           |           |
| 48 | 1 | 0 | 0.500827  | -3.391388 | 3.461473  |    |   |   |           |           |           |

HF=-1474.1928959\ZeroPoint=0.3537219\Thermal=0.3810965

HF=-1474.2024886\ZeroPoint=0.3539997\Thermal=0.381698

### B1-Ala<sup>2D</sup>-2-1

| Center Number | Atomic Number | Atomic Type | Coordinates (Angstroms) |           |           |
|---------------|---------------|-------------|-------------------------|-----------|-----------|
|               |               |             | X                       | Y         | Z         |
| 1             | 46            | 0           | -1.160794               | -0.670456 | -0.597479 |
| 2             | 46            | 0           | 1.425131                | 0.581933  | -0.050104 |
| 3             | 7             | 0           | -1.772778               | 1.195816  | -0.111204 |
| 4             | 7             | 0           | -2.859944               | 1.335234  | 0.523280  |
| 5             | 6             | 0           | -3.484315               | 0.126480  | 0.793664  |
| 6             | 6             | 0           | -2.813910               | -1.071385 | 0.425449  |
| 7             | 6             | 0           | -3.415918               | -2.281338 | 0.754551  |
| 8             | 1             | 0           | -2.929138               | -3.216066 | 0.496659  |
| 9             | 6             | 0           | -4.646682               | -2.297834 | 1.421879  |

### B1-Ala<sup>2D</sup>-2-2

| Center Number | Atomic Number | Atomic Type | Coordinates (Angstroms) |           |           |
|---------------|---------------|-------------|-------------------------|-----------|-----------|
|               |               |             | X                       | Y         | Z         |
| 1             | 46            | 0           | -1.261471               | -0.617879 | -0.522182 |
| 2             | 46            | 0           | 1.568664                | 0.344716  | -0.136561 |
| 3             | 7             | 0           | -1.563482               | 1.347109  | -0.165218 |
| 4             | 7             | 0           | -2.594432               | 1.698169  | 0.477038  |
| 5             | 6             | 0           | -3.379378               | 0.623109  | 0.870022  |
| 6             | 6             | 0           | -2.922625               | -0.687134 | 0.566956  |
| 7             | 6             | 0           | -3.692365               | -1.761315 | 0.998252  |
| 8             | 1             | 0           | -3.375264               | -2.777551 | 0.786961  |
| 9             | 6             | 0           | -4.878586               | -1.538981 | 1.710316  |
| 10            | 6             | 0           | -5.314994               | -0.242533 | 1.999146  |



|    |   |   |           |           |           |    |   |   |           |           |           |
|----|---|---|-----------|-----------|-----------|----|---|---|-----------|-----------|-----------|
| 11 | 1 | 0 | -6.234635 | -0.090157 | 2.551429  | 13 | 1 | 0 | -5.183057 | 1.134071  | 0.875359  |
| 12 | 6 | 0 | -4.564009 | 0.850441  | 1.580852  | 14 | 6 | 0 | -0.644661 | 2.523822  | -0.233375 |
| 13 | 1 | 0 | -4.872931 | 1.867037  | 1.793974  | 15 | 6 | 0 | 0.735015  | 2.361587  | 0.003075  |
| 14 | 6 | 0 | -0.656523 | 2.364505  | -0.593459 | 16 | 6 | 0 | 1.514817  | 3.524503  | 0.087629  |
| 15 | 6 | 0 | 0.725836  | 2.092099  | -0.636539 | 17 | 1 | 0 | 2.580521  | 3.444278  | 0.273761  |
| 16 | 6 | 0 | 1.571584  | 3.159990  | -0.970266 | 18 | 6 | 0 | 0.955698  | 4.790688  | -0.081543 |
| 17 | 1 | 0 | 2.644472  | 3.009320  | -0.949278 | 19 | 1 | 0 | 1.590151  | 5.669187  | -0.032832 |
| 18 | 6 | 0 | 1.067662  | 4.413104  | -1.306449 | 20 | 6 | 0 | -0.412552 | 4.926544  | -0.325624 |
| 19 | 1 | 0 | 1.749800  | 5.211976  | -1.577339 | 21 | 1 | 0 | -0.850075 | 5.908237  | -0.465255 |
| 20 | 6 | 0 | -0.311348 | 4.647598  | -1.290482 | 22 | 6 | 0 | -1.213245 | 3.796505  | -0.392446 |
| 21 | 1 | 0 | -0.706098 | 5.621555  | -1.555757 | 23 | 1 | 0 | -2.278623 | 3.874371  | -0.568329 |
| 22 | 6 | 0 | -1.173693 | 3.630801  | -0.918696 | 24 | 6 | 0 | -0.104388 | -1.149897 | 2.924367  |
| 23 | 1 | 0 | -2.242739 | 3.793265  | -0.869081 | 25 | 1 | 0 | -0.485366 | -0.589271 | 3.781932  |
| 24 | 6 | 0 | 3.660265  | -1.930829 | 2.978496  | 26 | 1 | 0 | -0.616393 | -0.816229 | 2.019453  |
| 25 | 1 | 0 | 3.356264  | -2.981566 | 2.927656  | 27 | 6 | 0 | 1.407297  | -0.956599 | 2.793484  |
| 26 | 1 | 0 | 4.671861  | -1.835453 | 2.571930  | 28 | 1 | 0 | 1.898670  | -1.293177 | 3.714470  |
| 27 | 6 | 0 | 2.689184  | -1.037573 | 2.218161  | 29 | 6 | 0 | 1.996164  | -1.781007 | 1.640225  |
| 28 | 1 | 0 | 1.676457  | -1.158566 | 2.616812  | 30 | 8 | 0 | 2.745030  | -1.248646 | 0.818639  |
| 29 | 6 | 0 | 3.018595  | 0.478245  | 2.365692  | 31 | 8 | 0 | 1.643522  | -3.031493 | 1.580910  |
| 30 | 8 | 0 | 2.577603  | 1.241291  | 1.415544  | 32 | 7 | 0 | 1.740604  | 0.480266  | 2.515327  |
| 31 | 8 | 0 | 3.629041  | 0.855340  | 3.352484  | 33 | 1 | 0 | 1.092860  | 1.089595  | 3.006040  |
| 32 | 7 | 0 | 2.600084  | -1.382625 | 0.763221  | 34 | 1 | 0 | 2.678119  | 0.705197  | 2.837755  |
| 33 | 1 | 0 | 3.544414  | -1.441755 | 0.384999  | 35 | 6 | 0 | 3.260564  | -1.135758 | -2.309443 |
| 34 | 1 | 0 | 2.190596  | -2.307017 | 0.654366  | 36 | 1 | 0 | 3.740686  | -1.065555 | -1.334902 |
| 35 | 6 | 0 | 2.300960  | -1.965404 | -2.702138 | 37 | 1 | 0 | 3.562332  | -0.280496 | -2.921055 |
| 36 | 1 | 0 | 2.900783  | -2.005238 | -1.793672 | 38 | 6 | 0 | 1.743093  | -1.164606 | -2.169286 |
| 37 | 1 | 0 | 2.656602  | -1.124769 | -3.299312 | 39 | 1 | 0 | 1.301316  | -1.278141 | -3.170538 |
| 38 | 6 | 0 | 0.819774  | -1.739708 | -2.374295 | 40 | 7 | 0 | 1.134944  | 0.065860  | -1.595916 |
| 39 | 1 | 0 | 0.261626  | -1.799202 | -3.324979 | 41 | 6 | 0 | 1.202129  | -2.384152 | -1.378521 |
| 40 | 7 | 0 | 0.493299  | -0.466620 | -1.727687 | 42 | 8 | 0 | -0.053639 | -2.348203 | -1.088987 |
| 41 | 6 | 0 | 0.182095  | -2.860270 | -1.578427 | 43 | 8 | 0 | 1.945709  | -3.313243 | -1.027276 |
| 42 | 8 | 0 | -0.786677 | -2.700783 | -0.836837 | 44 | 1 | 0 | -5.137893 | -3.132031 | 0.314257  |
| 43 | 8 | 0 | 0.700131  | -4.071506 | -1.762155 | 45 | 1 | 0 | 1.195766  | 0.829240  | -2.261795 |
| 44 | 1 | 0 | -5.466852 | -2.387019 | 2.045487  | 46 | 1 | 0 | -0.329225 | -2.205823 | 3.070667  |
| 45 | 1 | 0 | 0.432001  | 0.249672  | -2.442854 | 47 | 1 | 0 | 3.607834  | -2.052667 | -2.790133 |
| 46 | 1 | 0 | 3.701132  | -1.619934 | 4.022366  | 48 | 1 | 0 | 1.828780  | -3.371066 | 0.637830  |
| 47 | 1 | 0 | 2.449086  | -2.889351 | -3.264433 |    |   |   |           |           |           |
| 48 | 1 | 0 | 0.168886  | -4.713600 | -1.263724 |    |   |   |           |           |           |

HF=-1474.1910832\ZeroPoint=0.3533511\Thermal=0.3802815

HF=-1474.1756308\ZeroPoint=0.3530994\Thermal=0.3807895

#### B1-Ala<sup>2D</sup>-2-4

#### B1-Ala<sup>2D</sup>-2-3

| Center Number | Atomic Number | Atomic Type | Coordinates (Angstroms) |           |           |
|---------------|---------------|-------------|-------------------------|-----------|-----------|
|               |               |             | X                       | Y         | Z         |
| 1             | 46            | 0           | -0.812931               | -0.449448 | -0.876549 |
| 2             | 46            | 0           | 1.647984                | 0.613453  | 0.310423  |
| 3             | 7             | 0           | -1.481414               | 1.368612  | -0.289259 |
| 4             | 7             | 0           | -2.664858               | 1.477813  | 0.156266  |
| 5             | 6             | 0           | -3.346392               | 0.267531  | 0.151649  |
| 6             | 6             | 0           | -2.635813               | -0.900642 | -0.235954 |
| 7             | 6             | 0           | -3.300157               | -2.121573 | -0.166913 |
| 8             | 1             | 0           | -2.778364               | -3.030056 | -0.448209 |
| 9             | 6             | 0           | -4.630206               | -2.174007 | 0.264597  |
| 10            | 6             | 0           | -5.319936               | -1.012299 | 0.636026  |
| 11            | 1             | 0           | -6.350448               | -1.075861 | 0.965322  |
| 12            | 6             | 0           | -4.679082               | 0.218825  | 0.586519  |

| Center Number | Atomic Number | Atomic Type | Coordinates (Angstroms) |           |           |
|---------------|---------------|-------------|-------------------------|-----------|-----------|
|               |               |             | X                       | Y         | Z         |
| 1             | 46            | 0           | -1.099688               | -0.576921 | -0.788127 |
| 2             | 46            | 0           | 1.521657                | 0.622365  | -0.079421 |
| 3             | 7             | 0           | -1.705920               | 1.198005  | -0.033469 |
| 4             | 7             | 0           | -2.783241               | 1.247044  | 0.634144  |
| 5             | 6             | 0           | -3.403773               | 0.007457  | 0.733673  |
| 6             | 6             | 0           | -2.747904               | -1.122526 | 0.173121  |
| 7             | 6             | 0           | -3.352141               | -2.367084 | 0.324216  |
| 8             | 1             | 0           | -2.871436               | -3.247417 | -0.088993 |
| 9             | 6             | 0           | -4.569607               | -2.480485 | 1.005067  |
| 10            | 6             | 0           | -5.205609               | -1.356564 | 1.547814  |
| 11            | 1             | 0           | -6.149001               | -1.466550 | 2.069804  |
| 12            | 6             | 0           | -4.622735               | -0.102353 | 1.418337  |
| 13            | 1             | 0           | -5.087055               | 0.785613  | 1.831949  |
| 14            | 6             | 0           | -0.940202               | 2.399384  | -0.150729 |

|    |   |   |           |           |           |    |   |   |           |           |           |
|----|---|---|-----------|-----------|-----------|----|---|---|-----------|-----------|-----------|
| 15 | 6 | 0 | 0.465953  | 2.322306  | -0.223920 | 33 | 1 | 0 | 3.734003  | -0.978010 | 0.250427  |
| 16 | 6 | 0 | 1.173638  | 3.528817  | -0.308365 | 34 | 1 | 0 | 2.544246  | -2.013024 | -0.195381 |
| 17 | 1 | 0 | 2.257468  | 3.512161  | -0.354056 | 35 | 6 | 0 | 2.617154  | -0.916337 | -3.043719 |
| 18 | 6 | 0 | 0.517910  | 4.758972  | -0.343255 | 36 | 1 | 0 | 3.291432  | -0.779899 | -2.196389 |
| 19 | 1 | 0 | 1.093970  | 5.674302  | -0.427964 | 37 | 1 | 0 | 2.718635  | -0.044581 | -3.696454 |
| 20 | 6 | 0 | -0.876034 | 4.811074  | -0.280750 | 38 | 6 | 0 | 1.170516  | -1.062608 | -2.585488 |
| 21 | 1 | 0 | -1.391429 | 5.763998  | -0.315719 | 39 | 1 | 0 | 0.535132  | -1.168083 | -3.476963 |
| 22 | 6 | 0 | -1.603927 | 3.635382  | -0.176040 | 40 | 7 | 0 | 0.634569  | 0.087009  | -1.828747 |
| 23 | 1 | 0 | -2.684613 | 3.650091  | -0.114247 | 41 | 6 | 0 | 0.884533  | -2.340038 | -1.750707 |
| 24 | 6 | 0 | 3.513270  | -2.494099 | 2.413311  | 42 | 8 | 0 | -0.315897 | -2.428008 | -1.280816 |
| 25 | 1 | 0 | 3.508360  | -3.414184 | 1.826634  | 43 | 8 | 0 | 1.778896  | -3.165522 | -1.543911 |
| 26 | 1 | 0 | 4.522824  | -2.073352 | 2.394940  | 44 | 1 | 0 | -5.030295 | -3.457037 | 1.116071  |
| 27 | 6 | 0 | 2.502898  | -1.514679 | 1.810275  | 45 | 1 | 0 | 0.520100  | 0.892715  | -2.434936 |
| 28 | 1 | 0 | 1.497969  | -1.952353 | 1.861029  | 46 | 1 | 0 | 3.260031  | -2.734397 | 3.446294  |
| 29 | 6 | 0 | 2.392410  | -0.199470 | 2.569197  | 47 | 1 | 0 | 2.934663  | -1.807907 | -3.587350 |
| 30 | 8 | 0 | 2.176688  | 0.879563  | 2.034818  | 48 | 1 | 0 | 2.366246  | 0.559578  | 4.287222  |
| 31 | 8 | 0 | 2.518343  | -0.312258 | 3.887793  |    |   |   |           |           |           |
| 32 | 7 | 0 | 2.748282  | -1.192800 | 0.390357  |    |   |   |           |           |           |

-----  
HF=-1474.1850125\ZeroPoint=0.3537154\Thermal=0.3810576

## Structures from Table S3

**Table S3.** B3LYP-D3/6-311+G\*\*/SDD(Pd)/gas phase free energies for the pre- (R) and postreaction (P) complexes and the transition states (TS) for **the D-transfer to the monopalladated complexes M1-1 and M1-2** using various D-sources. Free energies relative to **M1-1** (in kcal mol<sup>-1</sup>).

| D-source→                                                                    | Cys <sup>4D</sup> ·DCI | Cys <sup>4D</sup> ·DCI       | Cys <sup>4D</sup> (neutral) |       | Cys <sup>4D</sup> (zwitter)  |                              | DCI   | AcOD |
|------------------------------------------------------------------------------|------------------------|------------------------------|-----------------------------|-------|------------------------------|------------------------------|-------|------|
| Donor group→                                                                 | COOD                   | ND <sub>3</sub> <sup>+</sup> | COOD                        | COOD  | ND <sub>3</sub> <sup>+</sup> | ND <sub>3</sub> <sup>+</sup> | DCI   | AcOD |
| <b>M1-1</b>                                                                  |                        |                              |                             |       |                              |                              |       |      |
| Prereaction complex (R)                                                      | <b>-12.0</b>           | -4.3                         | <b>0.7</b>                  | -7.8  | -2.7                         | -6.6**                       | -0.8  | -5.3 |
| Transition state (TS)                                                        | <b>9.8</b>             | 11.1                         | <b>17.5</b>                 | 18.9* | 25.0                         | 24.1*                        | 23.6  | 28.8 |
| Postreaction complex (P, 1 <sup>D</sup> coordinated <i>via</i> N(azo) to Pd) | <b>5.4</b>             | 5.6                          | <b>14.9</b>                 | 18.6* | 21.7                         | 22.8*                        | 13.5  | 22.6 |
| <b>M1-2</b>                                                                  |                        |                              |                             |       |                              |                              |       |      |
| Prereaction complex (R)                                                      | <b>2.7</b>             | 0.9                          | <b>5.7</b>                  | -     | 11.0                         | 3.0**                        | 2.8   | 1.7  |
| Transition state (TS)                                                        | <b>9.8</b>             | 14.6                         | <b>18.3</b>                 | -     | 27.0                         | 23.3*                        | 17.7  | 20.8 |
| Postreaction complex (P, 1 <sup>D</sup> coordinated <i>via</i> N(azo) to Pd) | <b>2.0</b>             | 8.6                          | <b>13.7</b>                 | -     | 19.9                         | 18.9*                        | -13.1 | -1.8 |

\* Species in which the intermolecular D-transfer from the coordinated Cys<sup>3D</sup> to the non-coordinated outer Cys<sup>4D</sup> occurred. \*\* Intermolecular D-transfer occurs spontaneously in the examined geometry.

G = -12.0 kcal mol<sup>-1</sup>

| Center Number | Atomic Number | Atomic Type | Coordinates (Angstroms) |           |           |
|---------------|---------------|-------------|-------------------------|-----------|-----------|
|               |               |             | X                       | Y         | Z         |
| 1             | 46            | 0           | -0.069261               | -0.722411 | -0.930167 |
| 2             | 16            | 0           | 0.257557                | 0.935631  | -2.537773 |
| 3             | 6             | 0           | -1.356315               | 1.826275  | -2.334964 |
| 4             | 1             | 0           | -1.586127               | 2.335311  | -3.269144 |
| 5             | 1             | 0           | -1.287484               | 2.572827  | -1.538285 |
| 6             | 6             | 0           | -2.461691               | 0.830613  | -1.983387 |
| 7             | 1             | 0           | -2.543536               | 0.106728  | -2.802043 |
| 8             | 7             | 0           | -2.085028               | 0.102331  | -0.756398 |
| 9             | 1             | 0           | -2.047966               | 0.772233  | 0.026872  |
| 10            | 6             | 0           | -3.847565               | 1.456782  | -1.833774 |
| 11            | 8             | 0           | -4.100549               | 2.366972  | -2.800112 |
| 12            | 8             | 0           | -4.646128               | 1.145935  | -0.988807 |
| 13            | 1             | 0           | -2.805559               | -0.573391 | -0.512243 |
| 14            | 1             | 0           | -5.003838               | 2.693036  | -2.666403 |
| 15            | 6             | 0           | 1.735106                | -1.556959 | -1.126815 |
| 16            | 6             | 0           | 1.888671                | -2.673501 | -0.256378 |
| 17            | 6             | 0           | 2.813307                | -1.247716 | -1.953128 |
| 18            | 7             | 0           | 0.850322                | -3.014036 | 0.606555  |
| 19            | 6             | 0           | 3.066200                | -3.436036 | -0.213260 |
| 20            | 1             | 0           | 2.751478                | -0.410058 | -2.638729 |
| 21            | 6             | 0           | 3.990953                | -2.001598 | -1.909426 |
| 22            | 7             | 0           | -0.143204               | -2.235404 | 0.514282  |
| 23            | 6             | 0           | 4.122569                | -3.092358 | -1.045444 |
| 24            | 1             | 0           | 3.127127                | -4.277154 | 0.467653  |
| 25            | 1             | 0           | 4.819322                | -1.728153 | -2.554236 |
| 26            | 6             | 0           | -1.247923               | -2.518671 | 1.370334  |
| 27            | 1             | 0           | 5.042862                | -3.663495 | -1.023965 |

|    |    |   |           |           |           |
|----|----|---|-----------|-----------|-----------|
| 28 | 6  | 0 | -1.883991 | -1.448125 | 2.004128  |
| 29 | 6  | 0 | -1.692523 | -3.831170 | 1.556593  |
| 30 | 6  | 0 | -2.973277 | -1.698923 | 2.833356  |
| 31 | 1  | 0 | -1.508893 | -0.438186 | 1.884725  |
| 32 | 6  | 0 | -2.790996 | -4.065934 | 2.376729  |
| 33 | 1  | 0 | -1.183149 | -4.641695 | 1.051090  |
| 34 | 1  | 0 | -3.457796 | -0.869216 | 3.334209  |
| 35 | 6  | 0 | -3.433717 | -3.003144 | 3.014841  |
| 36 | 1  | 0 | -3.149674 | -5.079578 | 2.514365  |
| 37 | 1  | 0 | -4.291260 | -3.192178 | 3.650279  |
| 38 | 1  | 0 | 2.415686  | -0.648238 | 1.320320  |
| 39 | 1  | 0 | 0.996164  | 3.568573  | -0.192482 |
| 40 | 7  | 0 | 1.181520  | 2.591883  | 0.044764  |
| 41 | 6  | 0 | 2.437769  | 2.532749  | 0.850189  |
| 42 | 1  | 0 | 0.317355  | 2.290033  | 0.615138  |
| 43 | 6  | 0 | 2.170043  | 3.066643  | 2.267656  |
| 44 | 1  | 0 | 3.190105  | 3.136810  | 0.344378  |
| 45 | 6  | 0 | 2.980878  | 1.104979  | 0.890896  |
| 46 | 1  | 0 | 3.115235  | 3.118124  | 2.808790  |
| 47 | 1  | 0 | 1.495529  | 2.394581  | 2.797261  |
| 48 | 16 | 0 | 1.436988  | 4.754501  | 2.281752  |
| 49 | 8  | 0 | 2.088326  | 0.260804  | 1.425031  |
| 50 | 8  | 0 | 4.080474  | 0.803754  | 0.510148  |
| 51 | 1  | 0 | 0.151813  | 4.324127  | 2.229885  |
| 52 | 1  | 0 | 1.179147  | 2.029829  | -0.842079 |
| 53 | 17 | 0 | -1.339440 | 2.245373  | 1.576193  |

HF=-2604.78612\ZeroPoint= 0.379323\Thermal=0.4122324

G = 9.8 kcal mol<sup>-1</sup>

Center Atomic Atomic Coordinates (Angstroms)

| Number | Number | Type | X         | Y         | Z         |
|--------|--------|------|-----------|-----------|-----------|
| 1      | 46     | 0    | 0.714081  | 0.144120  | 0.632864  |
| 2      | 16     | 0    | -0.237499 | -0.994138 | 2.420977  |
| 3      | 6      | 0    | -1.595335 | 0.197585  | 2.827065  |
| 4      | 1      | 0    | -1.810433 | 0.122037  | 3.891721  |
| 5      | 1      | 0    | -2.496544 | -0.047877 | 2.260930  |
| 6      | 6      | 0    | -1.148651 | 1.610280  | 2.469686  |
| 7      | 1      | 0    | -0.285637 | 1.874517  | 3.090518  |
| 8      | 7      | 0    | -0.722538 | 1.618310  | 1.051252  |
| 9      | 1      | 0    | -1.536262 | 1.351546  | 0.462800  |
| 10     | 6      | 0    | -2.192450 | 2.701024  | 2.699013  |
| 11     | 8      | 0    | -2.871339 | 2.518085  | 3.849094  |
| 12     | 8      | 0    | -2.355771 | 3.642543  | 1.966500  |
| 13     | 1      | 0    | -0.447425 | 2.556111  | 0.764719  |
| 14     | 1      | 0    | -3.490644 | 3.257795  | 3.948071  |
| 15     | 6      | 0    | 2.458502  | -1.088890 | 0.323947  |
| 16     | 6      | 0    | 3.382049  | -0.228462 | -0.338411 |
| 17     | 6      | 0    | 2.976373  | -2.075874 | 1.171039  |
| 18     | 7      | 0    | 2.923759  | 0.816422  | -1.143447 |
| 19     | 6      | 0    | 4.761429  | -0.392176 | -0.201555 |
| 20     | 1      | 0    | 2.287988  | -2.767306 | 1.639767  |
| 21     | 6      | 0    | 4.353718  | -2.214038 | 1.340212  |
| 22     | 7      | 0    | 1.708182  | 1.101358  | -0.951874 |
| 23     | 6      | 0    | 5.241289  | -1.382918 | 0.650932  |
| 24     | 1      | 0    | 5.431983  | 0.268280  | -0.737884 |
| 25     | 1      | 0    | 4.739622  | -2.988937 | 1.992766  |
| 26     | 6      | 0    | 1.161172  | 2.153420  | -1.738313 |
| 27     | 1      | 0    | 6.310260  | -1.511264 | 0.776416  |
| 28     | 6      | 0    | -0.200038 | 2.088122  | -2.051829 |
| 29     | 6      | 0    | 1.948454  | 3.227820  | -2.171704 |
| 30     | 6      | 0    | -0.774726 | 3.103584  | -2.809241 |
| 31     | 1      | 0    | -0.800317 | 1.244015  | -1.732927 |
| 32     | 6      | 0    | 1.358290  | 4.240648  | -2.916647 |
| 33     | 1      | 0    | 2.998385  | 3.258116  | -1.911679 |
| 34     | 1      | 0    | -1.828298 | 3.046188  | -3.054444 |
| 35     | 6      | 0    | -0.001098 | 4.181731  | -3.237007 |
| 36     | 1      | 0    | 1.956828  | 5.082846  | -3.244051 |
| 37     | 1      | 0    | -0.454603 | 4.978678  | -3.814958 |
| 38     | 1      | 0    | 1.501025  | -1.520642 | -0.384062 |
| 39     | 1      | 0    | -3.148456 | -2.953867 | 0.350966  |
| 40     | 7      | 0    | -2.233159 | -2.540490 | 0.174757  |
| 41     | 6      | 0    | -1.511456 | -3.280650 | -0.928559 |
| 42     | 1      | 0    | -2.417680 | -1.524449 | -0.090176 |
| 43     | 6      | 0    | -1.964393 | -2.772935 | -2.288321 |
| 44     | 1      | 0    | -1.743445 | -4.337857 | -0.799177 |
| 45     | 6      | 0    | -0.002910 | -3.081812 | -0.604048 |
| 46     | 1      | 0    | -1.482935 | -3.372308 | -3.060796 |
| 47     | 1      | 0    | -1.658511 | -1.737756 | -2.427360 |
| 48     | 16     | 0    | -3.787710 | -2.903255 | -2.556622 |
| 49     | 8      | 0    | 0.592484  | -2.179859 | -1.282743 |
| 50     | 8      | 0    | 0.431362  | -3.726633 | 0.350138  |
| 51     | 1      | 0    | -4.076149 | -1.674817 | -2.067445 |
| 52     | 1      | 0    | -1.665640 | -2.527024 | 1.039032  |
| 53     | 17     | 0    | -3.055084 | 0.278336  | -0.587674 |

HF=-2604.7506011\ZeroPoint=0.3758715\Thermal=0.4080361

G = 5.4 kcal mol<sup>-1</sup>

| Center Number | Atomic Number | Atomic Type | Coordinates (Angstroms) |           |           |
|---------------|---------------|-------------|-------------------------|-----------|-----------|
|               |               |             | X                       | Y         | Z         |
| 1             | 46            | 0           | -0.836403               | 0.084554  | -0.506387 |
| 2             | 16            | 0           | -0.225861               | -0.646042 | -2.608168 |
| 3             | 6             | 0           | 0.870142                | 0.752616  | -3.122194 |
| 4             | 1             | 0           | 0.783292                | 0.881914  | -4.200055 |
| 5             | 1             | 0           | 1.906362                | 0.526288  | -2.865941 |
| 6             | 6             | 0           | 0.428832                | 2.014388  | -2.393918 |
| 7             | 1             | 0           | -0.578881               | 2.284245  | -2.727529 |
| 8             | 7             | 0           | 0.373759                | 1.709139  | -0.942334 |
| 9             | 1             | 0           | 1.326744                | 1.412895  | -0.634218 |
| 10            | 6             | 0           | 1.300332                | 3.248483  | -2.614307 |
| 11            | 8             | 0           | 1.722238                | 3.349893  | -3.888811 |
| 12            | 8             | 0           | 1.537219                | 4.063517  | -1.759769 |
| 13            | 1             | 0           | 0.131541                | 2.542554  | -0.408318 |
| 14            | 1             | 0           | 2.243013                | 4.164504  | -3.965376 |
| 15            | 6             | 0           | -2.549920               | -1.353843 | 0.020520  |
| 16            | 6             | 0           | -3.348232               | -0.428943 | 0.740704  |
| 17            | 6             | 0           | -3.144575               | -2.178705 | -0.936204 |
| 18            | 7             | 0           | -2.757682               | 0.447595  | 1.667330  |
| 19            | 6             | 0           | -4.725689               | -0.371393 | 0.538123  |
| 20            | 1             | 0           | -2.512823               | -2.899725 | -1.440829 |
| 21            | 6             | 0           | -4.513878               | -2.083387 | -1.175196 |
| 22            | 7             | 0           | -1.560458               | 0.722588  | 1.382833  |
| 23            | 6             | 0           | -5.296664               | -1.192622 | -0.433439 |
| 24            | 1             | 0           | -5.323776               | 0.325762  | 1.112010  |
| 25            | 1             | 0           | -4.981124               | -2.719215 | -1.917960 |
| 26            | 6             | 0           | -0.850072               | 1.571822  | 2.273352  |
| 27            | 1             | 0           | -6.364541               | -1.139423 | -0.612568 |
| 28            | 6             | 0           | 0.546697                | 1.492223  | 2.254859  |
| 29            | 6             | 0           | -1.507810               | 2.466184  | 3.128894  |
| 30            | 6             | 0           | 1.289729                | 2.310601  | 3.098549  |
| 31            | 1             | 0           | 1.049293                | 0.783510  | 1.607750  |
| 32            | 6             | 0           | -0.753259               | 3.282937  | 3.959576  |
| 33            | 1             | 0           | -2.588660               | 2.513334  | 3.123027  |
| 34            | 1             | 0           | 2.370631                | 2.243587  | 3.081318  |
| 35            | 6             | 0           | 0.643338                | 3.207735  | 3.947233  |
| 36            | 1             | 0           | -1.252193               | 3.986274  | 4.616046  |
| 37            | 1             | 0           | 1.223790                | 3.852935  | 4.596534  |
| 38            | 1             | 0           | -1.583365               | -1.690935 | 0.466510  |
| 39            | 1             | 0           | 3.251820                | -2.883126 | -1.154176 |
| 40            | 7             | 0           | 2.368191                | -2.497072 | -0.823910 |
| 41            | 6             | 0           | 1.930963                | -3.122357 | 0.477225  |
| 42            | 1             | 0           | 2.514252                | -1.455987 | -0.709546 |
| 43            | 6             | 0           | 2.646827                | -2.504349 | 1.664849  |
| 44            | 1             | 0           | 2.158486                | -4.187512 | 0.398877  |
| 45            | 6             | 0           | 0.372775                | -2.967744 | 0.486966  |
| 46            | 1             | 0           | 2.345789                | -3.042489 | 2.561871  |
| 47            | 1             | 0           | 2.358459                | -1.463191 | 1.791087  |
| 48            | 16            | 0           | 4.489981                | -2.593139 | 1.555094  |
| 49            | 8             | 0           | -0.149902               | -2.475446 | 1.507495  |
| 50            | 8             | 0           | -0.166514               | -3.312022 | -0.589897 |
| 51            | 1             | 0           | 4.634438                | -1.402926 | 0.929080  |
| 52            | 1             | 0           | 1.603946                | -2.661290 | -1.498401 |
| 53            | 17            | 0           | 3.116701                | 0.436486  | -0.272900 |

-----  
HF=-2604.7537109\ZeroPoint=0.3749492\Thermal=0.4081827

51 1 0 1.896654 0.241728 1.515760  
52 16 0 5.203933 1.550414 -2.302510  
53 1 0 4.624712 2.513729 -1.549185  
-----

G = 2.7 kcal mol<sup>-1</sup>

HF=-2604.7605911\ZeroPoint=0.3776242\Thermal=0.4104873

-----  
Center Atomic Atomic Coordinates (Angstroms)  
Number Number Type X Y Z  
-----

|    |    |   |           |           |           |
|----|----|---|-----------|-----------|-----------|
| 1  | 46 | 0 | -0.997505 | -0.578017 | 0.759958  |
| 2  | 7  | 0 | -2.552593 | 0.252378  | -0.296513 |
| 3  | 7  | 0 | -3.222164 | -0.498690 | -1.071044 |
| 4  | 6  | 0 | -2.719127 | -1.790195 | -1.157422 |
| 5  | 6  | 0 | -1.493196 | -2.098919 | -0.501860 |
| 6  | 6  | 0 | -1.011375 | -3.403020 | -0.645792 |
| 7  | 1  | 0 | -0.075513 | -3.693755 | -0.177807 |
| 8  | 6  | 0 | -1.702736 | -4.348948 | -1.409137 |
| 9  | 6  | 0 | -2.903845 | -4.017973 | -2.045815 |
| 10 | 1  | 0 | -3.430472 | -4.761344 | -2.632619 |
| 11 | 6  | 0 | -3.416949 | -2.732965 | -1.925173 |
| 12 | 1  | 0 | -4.346574 | -2.446327 | -2.403186 |
| 13 | 6  | 0 | -2.965092 | 1.615043  | -0.225718 |
| 14 | 6  | 0 | -4.320428 | 1.956658  | -0.318390 |
| 15 | 6  | 0 | -4.690949 | 3.293040  | -0.256428 |
| 16 | 1  | 0 | -5.740089 | 3.561128  | -0.307477 |
| 17 | 6  | 0 | -3.718598 | 4.288192  | -0.119145 |
| 18 | 1  | 0 | -4.014388 | 5.330012  | -0.068471 |
| 19 | 6  | 0 | -2.372584 | 3.939712  | -0.036586 |
| 20 | 1  | 0 | -1.612009 | 4.703628  | 0.072435  |
| 21 | 6  | 0 | -1.985303 | 2.602565  | -0.078590 |
| 22 | 1  | 0 | -0.938583 | 2.335485  | -0.007931 |
| 23 | 6  | 0 | 1.544658  | -0.451893 | 2.283546  |
| 24 | 7  | 0 | 0.682273  | -1.468994 | 1.627735  |
| 25 | 1  | 0 | 0.414271  | -2.176123 | 2.311231  |
| 26 | 6  | 0 | 0.718550  | 0.334219  | 3.306120  |
| 27 | 1  | 0 | -1.300258 | -5.351303 | -1.512817 |
| 28 | 1  | 0 | 1.217499  | -1.942940 | 0.899831  |
| 29 | 1  | 0 | -5.059272 | 1.172951  | -0.422093 |
| 30 | 1  | 0 | -0.060761 | -1.071764 | -1.486983 |
| 31 | 6  | 0 | 4.123233  | 0.200264  | -1.677759 |
| 32 | 1  | 0 | 4.697800  | -0.723589 | -1.704161 |
| 33 | 1  | 0 | 3.873538  | 0.424576  | -0.643816 |
| 34 | 6  | 0 | 2.835089  | 0.001406  | -2.495674 |
| 35 | 1  | 0 | 3.060194  | -0.513072 | -3.434988 |
| 36 | 7  | 0 | 2.187972  | 1.306230  | -2.822868 |
| 37 | 1  | 0 | 2.017067  | 1.847787  | -1.824117 |
| 38 | 6  | 0 | 1.837373  | -0.863664 | -1.718333 |
| 39 | 8  | 0 | 0.591015  | -0.639559 | -2.108483 |
| 40 | 8  | 0 | 2.188172  | -1.656122 | -0.875422 |
| 41 | 1  | 0 | 1.290654  | 1.170453  | -3.285873 |
| 42 | 1  | 0 | 2.813883  | 1.872592  | -3.397618 |
| 43 | 17 | 0 | 1.961157  | 2.397965  | -0.187862 |
| 44 | 16 | 0 | -0.816886 | 0.989510  | 2.522124  |
| 45 | 1  | 0 | 0.462071  | -0.311097 | 4.153472  |
| 46 | 1  | 0 | 1.310683  | 1.170189  | 3.678382  |
| 47 | 6  | 0 | 2.732816  | -1.134516 | 2.939383  |
| 48 | 8  | 0 | 2.816740  | -2.320837 | 3.150217  |
| 49 | 8  | 0 | 3.684194  | -0.246813 | 3.289529  |
| 50 | 1  | 0 | 4.393082  | -0.732239 | 3.738550  |

G = 9.8 kcal mol<sup>-1</sup>

-----  
Center Atomic Atomic Coordinates (Angstroms)  
Number Number Type X Y Z  
-----

|    |    |   |           |           |           |
|----|----|---|-----------|-----------|-----------|
| 1  | 46 | 0 | -0.844881 | -0.508711 | 0.677360  |
| 2  | 7  | 0 | -2.490693 | 0.277465  | -0.270672 |
| 3  | 7  | 0 | -3.223229 | -0.513047 | -0.938376 |
| 4  | 6  | 0 | -2.721711 | -1.808298 | -1.020710 |
| 5  | 6  | 0 | -1.358533 | -2.066168 | -0.694577 |
| 6  | 6  | 0 | -0.926092 | -3.397492 | -0.751582 |
| 7  | 1  | 0 | 0.117608  | -3.618901 | -0.552561 |
| 8  | 6  | 0 | -1.794911 | -4.420856 | -1.128047 |
| 9  | 6  | 0 | -3.121615 | -4.136536 | -1.472627 |
| 10 | 1  | 0 | -3.785992 | -4.937599 | -1.775041 |
| 11 | 6  | 0 | -3.588096 | -2.828299 | -1.431897 |
| 12 | 1  | 0 | -4.613596 | -2.584886 | -1.683361 |
| 13 | 6  | 0 | -2.903767 | 1.638872  | -0.209163 |
| 14 | 6  | 0 | -4.259425 | 1.985007  | -0.297615 |
| 15 | 6  | 0 | -4.622252 | 3.322900  | -0.242556 |
| 16 | 1  | 0 | -5.670018 | 3.596297  | -0.291431 |
| 17 | 6  | 0 | -3.643841 | 4.314601  | -0.116044 |
| 18 | 1  | 0 | -3.935101 | 5.357990  | -0.072373 |
| 19 | 6  | 0 | -2.299114 | 3.961517  | -0.035740 |
| 20 | 1  | 0 | -1.533804 | 4.721856  | 0.063609  |
| 21 | 6  | 0 | -1.918495 | 2.622434  | -0.069223 |
| 22 | 1  | 0 | -0.871108 | 2.354277  | -0.003593 |
| 23 | 6  | 0 | 1.648051  | -0.341050 | 2.265812  |
| 24 | 7  | 0 | 0.868705  | -1.349997 | 1.504360  |
| 25 | 1  | 0 | 0.637007  | -2.132664 | 2.115094  |
| 26 | 6  | 0 | 0.741471  | 0.297752  | 3.320133  |
| 27 | 1  | 0 | -1.435437 | -5.443035 | -1.175767 |
| 28 | 1  | 0 | 1.429932  | -1.727594 | 0.732129  |
| 29 | 1  | 0 | -5.002717 | 1.204932  | -0.393745 |
| 30 | 1  | 0 | -0.390231 | -1.264597 | -1.312246 |
| 31 | 6  | 0 | 3.938900  | 0.134162  | -1.760142 |
| 32 | 1  | 0 | 4.524066  | -0.782339 | -1.796562 |
| 33 | 1  | 0 | 3.689015  | 0.343865  | -0.723175 |
| 34 | 6  | 0 | 2.658423  | -0.071452 | -2.578179 |
| 35 | 1  | 0 | 2.894045  | -0.529331 | -3.543060 |
| 36 | 7  | 0 | 1.965715  | 1.227492  | -2.849471 |
| 37 | 1  | 0 | 1.856603  | 1.761774  | -1.882260 |
| 38 | 6  | 0 | 1.656277  | -0.988132 | -1.843133 |
| 39 | 8  | 0 | 0.428876  | -0.755120 | -2.152394 |
| 40 | 8  | 0 | 2.077211  | -1.824646 | -1.047570 |
| 41 | 1  | 0 | 1.031166  | 1.043001  | -3.217376 |
| 42 | 1  | 0 | 2.514000  | 1.810950  | -3.481600 |
| 43 | 17 | 0 | 1.884335  | 2.406295  | -0.189546 |
| 44 | 16 | 0 | -0.820171 | 0.891045  | 2.534151  |
| 45 | 1  | 0 | 0.510375  | -0.426206 | 4.108324  |
| 46 | 1  | 0 | 1.246813  | 1.152231  | 3.770193  |
| 47 | 6  | 0 | 2.854810  | -1.002477 | 2.910244  |

|                                                        |    |   |          |           |           |    |    |   |          |           |           |
|--------------------------------------------------------|----|---|----------|-----------|-----------|----|----|---|----------|-----------|-----------|
| 48                                                     | 8  | 0 | 3.001939 | -2.194508 | 3.032015  | 45 | 1  | 0 | 0.680374 | -0.386948 | 3.919425  |
| 49                                                     | 8  | 0 | 3.735396 | -0.089979 | 3.363381  | 46 | 1  | 0 | 1.369224 | 1.215086  | 3.566402  |
| 50                                                     | 1  | 0 | 4.464049 | -0.564661 | 3.791918  | 47 | 6  | 0 | 2.979637 | -0.914522 | 2.595323  |
| 51                                                     | 1  | 0 | 1.975950 | 0.432706  | 1.565881  | 48 | 8  | 0 | 3.138901 | -2.105807 | 2.700342  |
| 52                                                     | 16 | 0 | 5.004333 | 1.508433  | -2.366768 | 49 | 8  | 0 | 3.878715 | 0.003213  | 2.996395  |
| 53                                                     | 1  | 0 | 4.400257 | 2.455706  | -1.611448 | 50 | 1  | 0 | 4.642451 | -0.465025 | 3.367254  |
| -----                                                  |    |   |          |           |           | 51 | 1  | 0 | 2.012536 | 0.540500  | 1.330962  |
| HF=-2604.7489444\ZeroPoint=0.3749956\Thermal=0.4071548 |    |   |          |           |           | 52 | 16 | 0 | 5.222906 | 1.076001  | -1.651300 |
| -----                                                  |    |   |          |           |           | 53 | 1  | 0 | 4.532767 | 2.114515  | -1.123499 |

G = 2.0 kcal mol<sup>-1</sup>

-----  
Center Atomic Atomic Coordinates (Angstroms)  
Number Number Type X Y Z  
-----

|    |    |   |           |           |           |
|----|----|---|-----------|-----------|-----------|
| 1  | 46 | 0 | -0.817079 | -0.422522 | 0.548523  |
| 2  | 7  | 0 | -2.572339 | 0.362073  | -0.242582 |
| 3  | 7  | 0 | -3.439587 | -0.435489 | -0.695020 |
| 4  | 6  | 0 | -3.025782 | -1.775374 | -0.742216 |
| 5  | 6  | 0 | -1.671321 | -2.118264 | -0.959496 |
| 6  | 6  | 0 | -1.283796 | -3.457688 | -0.936700 |
| 7  | 1  | 0 | -0.240652 | -3.689594 | -1.121798 |
| 8  | 6  | 0 | -2.236598 | -4.449129 | -0.710075 |
| 9  | 6  | 0 | -3.582378 | -4.106208 | -0.538603 |
| 10 | 1  | 0 | -4.320349 | -4.883999 | -0.379821 |
| 11 | 6  | 0 | -3.986807 | -2.774869 | -0.569791 |
| 12 | 1  | 0 | -5.023516 | -2.495899 | -0.426605 |
| 13 | 6  | 0 | -2.901598 | 1.748155  | -0.240490 |
| 14 | 6  | 0 | -4.236918 | 2.177812  | -0.254963 |
| 15 | 6  | 0 | -4.507644 | 3.537497  | -0.258454 |
| 16 | 1  | 0 | -5.536181 | 3.879132  | -0.252209 |
| 17 | 6  | 0 | -3.460128 | 4.466035  | -0.262980 |
| 18 | 1  | 0 | -3.681258 | 5.527397  | -0.265688 |
| 19 | 6  | 0 | -2.138024 | 4.029548  | -0.254434 |
| 20 | 1  | 0 | -1.318930 | 4.738358  | -0.257101 |
| 21 | 6  | 0 | -1.847756 | 2.668247  | -0.231134 |
| 22 | 1  | 0 | -0.814806 | 2.339903  | -0.222801 |
| 23 | 6  | 0 | 1.733865  | -0.256901 | 2.026525  |
| 24 | 7  | 0 | 0.925331  | -1.257689 | 1.286671  |
| 25 | 1  | 0 | 0.722851  | -2.050728 | 1.895082  |
| 26 | 6  | 0 | 0.870136  | 0.348738  | 3.132138  |
| 27 | 1  | 0 | -1.940576 | -5.491602 | -0.691888 |
| 28 | 1  | 0 | 1.431646  | -1.634610 | 0.463333  |
| 29 | 1  | 0 | -5.034018 | 1.446719  | -0.250479 |
| 30 | 1  | 0 | -0.962813 | -1.397029 | -1.413521 |
| 31 | 6  | 0 | 3.895422  | -0.163556 | -1.331010 |
| 32 | 1  | 0 | 4.368823  | -1.133629 | -1.195882 |
| 33 | 1  | 0 | 3.414374  | 0.118328  | -0.398467 |
| 34 | 6  | 0 | 2.861320  | -0.280883 | -2.447719 |
| 35 | 1  | 0 | 3.311290  | -0.744798 | -3.329520 |
| 36 | 7  | 0 | 2.332208  | 1.056846  | -2.867401 |
| 37 | 1  | 0 | 2.121001  | 1.649332  | -1.982475 |
| 38 | 6  | 0 | 1.612824  | -1.125508 | -2.042747 |
| 39 | 8  | 0 | 0.539276  | -0.770766 | -2.581046 |
| 40 | 8  | 0 | 1.805197  | -2.050240 | -1.220776 |
| 41 | 1  | 0 | 1.432056  | 0.870297  | -3.328848 |
| 42 | 1  | 0 | 2.984199  | 1.568366  | -3.459060 |
| 43 | 17 | 0 | 1.854003  | 2.462141  | -0.303467 |
| 44 | 16 | 0 | -0.732008 | 0.919960  | 2.408427  |

-----  
HF=-2604.762957\ZeroPoint=0.3787629\Thermal=0.4115772

G = -4.3 kcal mol<sup>-1</sup>

-----  
Center Atomic Atomic Coordinates (Angstroms)  
Number Number Type X Y Z  
-----

|    |    |   |           |           |           |
|----|----|---|-----------|-----------|-----------|
| 1  | 7  | 0 | 1.477306  | 2.794905  | 0.553510  |
| 2  | 7  | 0 | 0.381953  | 2.172518  | 0.454513  |
| 3  | 6  | 0 | -0.695119 | 2.637875  | 1.263442  |
| 4  | 6  | 0 | -0.917507 | 4.007662  | 1.444741  |
| 5  | 6  | 0 | -2.008070 | 4.420960  | 2.201194  |
| 6  | 1  | 0 | -2.198239 | 5.480124  | 2.332066  |
| 7  | 6  | 0 | -2.863890 | 3.479005  | 2.778257  |
| 8  | 6  | 0 | -2.624985 | 2.116057  | 2.603688  |
| 9  | 1  | 0 | -3.278560 | 1.371338  | 3.041601  |
| 10 | 6  | 0 | -1.541371 | 1.689301  | 1.843488  |
| 11 | 1  | 0 | -1.338305 | 0.631888  | 1.740576  |
| 12 | 6  | 0 | 2.472474  | 2.284196  | -0.281892 |
| 13 | 6  | 0 | 3.730490  | 2.899169  | -0.265967 |
| 14 | 6  | 0 | 4.737956  | 2.408711  | -1.089129 |
| 15 | 1  | 0 | 5.715906  | 2.875215  | -1.090117 |
| 16 | 6  | 0 | 4.477455  | 1.319064  | -1.923855 |
| 17 | 1  | 0 | 5.258263  | 0.946112  | -2.578749 |
| 18 | 6  | 0 | 3.216694  | 0.709060  | -1.937911 |
| 19 | 1  | 0 | 3.037595  | -0.121151 | -2.614551 |
| 20 | 6  | 0 | 2.186369  | 1.165792  | -1.112475 |
| 21 | 1  | 0 | -3.718629 | 3.809551  | 3.357266  |
| 22 | 1  | 0 | 3.893480  | 3.751300  | 0.383623  |
| 23 | 46 | 0 | 0.258962  | 0.617305  | -0.950996 |
| 24 | 16 | 0 | 0.370672  | -1.150548 | -2.443752 |
| 25 | 6  | 0 | -1.369695 | -1.764887 | -2.244103 |
| 26 | 1  | 0 | -1.624827 | -2.341420 | -3.132603 |
| 27 | 1  | 0 | -1.449833 | -2.417344 | -1.373277 |
| 28 | 6  | 0 | -2.302304 | -0.572853 | -2.091807 |
| 29 | 1  | 0 | -2.205865 | 0.065211  | -2.976007 |
| 30 | 7  | 0 | -1.876911 | 0.228859  | -0.913357 |
| 31 | 6  | 0 | -3.796347 | -0.886737 | -1.967908 |
| 32 | 1  | 0 | -2.161329 | -0.299503 | -0.068084 |
| 33 | 1  | 0 | -2.429634 | 1.084044  | -0.874602 |
| 34 | 8  | 0 | -4.100948 | -2.168722 | -2.238756 |
| 35 | 8  | 0 | -4.612425 | -0.043101 | -1.697688 |
| 36 | 1  | 0 | -5.051208 | -2.281732 | -2.081816 |
| 37 | 1  | 0 | 1.968419  | -0.725270 | -0.015739 |
| 38 | 7  | 0 | 2.448670  | -1.512376 | 0.483382  |
| 39 | 6  | 0 | 1.523544  | -2.688135 | 0.546231  |
| 40 | 1  | 0 | 3.315389  | -1.717024 | -0.013981 |
| 41 | 6  | 0 | 2.168799  | -3.895384 | 1.226747  |

|    |    |   |           |           |           |
|----|----|---|-----------|-----------|-----------|
| 42 | 1  | 0 | 1.250246  | -2.920638 | -0.485148 |
| 43 | 6  | 0 | 0.268249  | -2.191262 | 1.277159  |
| 44 | 16 | 0 | 2.893885  | -3.549677 | 2.885074  |
| 45 | 1  | 0 | 2.999737  | -4.275944 | 0.628098  |
| 46 | 1  | 0 | 1.420143  | -4.683718 | 1.298351  |
| 47 | 8  | 0 | -0.736581 | -2.992853 | 1.095878  |
| 48 | 8  | 0 | 0.310535  | -1.159226 | 1.920455  |
| 49 | 1  | 0 | 1.736940  | -3.222707 | 3.498371  |
| 50 | 1  | 0 | -1.660330 | -2.524775 | 1.344734  |
| 51 | 1  | 0 | 2.662137  | -1.192060 | 1.433862  |
| 52 | 17 | 0 | -3.171416 | -1.582813 | 1.390990  |
| 53 | 1  | 0 | -0.250817 | 4.722207  | 0.979114  |

HF=-2604.7738134\ZeroPoint=0.3785083\Thermal=0.411363

G = 11.1 kcal mol<sup>-1</sup>

Center Atomic Atomic Coordinates (Angstroms)  
Number Number Type X Y Z

|    |    |   |           |           |           |
|----|----|---|-----------|-----------|-----------|
| 1  | 7  | 0 | 1.453670  | 2.663404  | 0.592141  |
| 2  | 7  | 0 | 0.391397  | 1.976160  | 0.607214  |
| 3  | 6  | 0 | -0.621964 | 2.388953  | 1.515583  |
| 4  | 6  | 0 | -0.790013 | 3.743238  | 1.840414  |
| 5  | 6  | 0 | -1.824805 | 4.110899  | 2.689249  |
| 6  | 1  | 0 | -1.973353 | 5.156992  | 2.931011  |
| 7  | 6  | 0 | -2.682657 | 3.140724  | 3.217732  |
| 8  | 6  | 0 | -2.501444 | 1.795970  | 2.898340  |
| 9  | 1  | 0 | -3.157679 | 1.031792  | 3.296551  |
| 10 | 6  | 0 | -1.473322 | 1.413273  | 2.044033  |
| 11 | 1  | 0 | -1.313811 | 0.364681  | 1.835286  |
| 12 | 6  | 0 | 2.377134  | 2.249361  | -0.371200 |
| 13 | 6  | 0 | 3.422049  | 3.123542  | -0.683455 |
| 14 | 6  | 0 | 4.301538  | 2.796246  | -1.710455 |
| 15 | 1  | 0 | 5.105892  | 3.475495  | -1.967487 |
| 16 | 6  | 0 | 4.142922  | 1.601502  | -2.419658 |
| 17 | 1  | 0 | 4.823351  | 1.359772  | -3.228291 |
| 18 | 6  | 0 | 3.120899  | 0.715853  | -2.084641 |
| 19 | 1  | 0 | 3.021851  | -0.223022 | -2.619462 |
| 20 | 6  | 0 | 2.226522  | 1.001798  | -1.043263 |
| 21 | 1  | 0 | -3.494953 | 3.437886  | 3.871158  |
| 22 | 1  | 0 | 3.508199  | 4.057527  | -0.141304 |
| 23 | 46 | 0 | 0.185189  | 0.472556  | -0.863672 |
| 24 | 16 | 0 | 0.161124  | -1.129137 | -2.518695 |
| 25 | 6  | 0 | -1.602433 | -1.656063 | -2.331516 |
| 26 | 1  | 0 | -1.907295 | -2.150270 | -3.253217 |
| 27 | 1  | 0 | -1.701519 | -2.356221 | -1.501402 |
| 28 | 6  | 0 | -2.438098 | -0.413314 | -2.076148 |
| 29 | 1  | 0 | -2.318486 | 0.275838  | -2.918542 |
| 30 | 7  | 0 | -1.911098 | 0.261413  | -0.857515 |
| 31 | 6  | 0 | -3.946383 | -0.611769 | -1.909111 |
| 32 | 1  | 0 | -2.189790 | -0.340065 | -0.047686 |
| 33 | 1  | 0 | -2.399309 | 1.145160  | -0.717791 |
| 34 | 8  | 0 | -4.381055 | -1.791154 | -2.383173 |
| 35 | 8  | 0 | -4.664147 | 0.242849  | -1.455531 |
| 36 | 1  | 0 | -5.333013 | -1.845710 | -2.206574 |
| 37 | 1  | 0 | 2.114729  | -0.070680 | -0.273920 |
| 38 | 7  | 0 | 2.660361  | -1.184816 | 0.586954  |

|    |    |   |           |           |           |
|----|----|---|-----------|-----------|-----------|
| 39 | 6  | 0 | 1.843824  | -2.404971 | 0.500909  |
| 40 | 1  | 0 | 3.624875  | -1.360209 | 0.317350  |
| 41 | 6  | 0 | 2.504188  | -3.662817 | 1.093156  |
| 42 | 1  | 0 | 1.621966  | -2.594688 | -0.553294 |
| 43 | 6  | 0 | 0.511601  | -2.110659 | 1.191237  |
| 44 | 16 | 0 | 3.088347  | -3.497059 | 2.831290  |
| 45 | 1  | 0 | 3.401936  | -3.912288 | 0.522424  |
| 46 | 1  | 0 | 1.811075  | -4.500165 | 1.009338  |
| 47 | 8  | 0 | -0.423019 | -2.960087 | 0.838960  |
| 48 | 8  | 0 | 0.399200  | -1.187988 | 1.975558  |
| 49 | 1  | 0 | 1.879200  | -3.269266 | 3.385159  |
| 50 | 1  | 0 | -1.352583 | -2.627629 | 1.125660  |
| 51 | 1  | 0 | 2.652074  | -0.841680 | 1.547439  |
| 52 | 17 | 0 | -3.048965 | -1.775655 | 1.201761  |
| 53 | 1  | 0 | -0.126687 | 4.481763  | 1.409770  |

HF=-2604.7474071\ZeroPoint=0.3747354\Thermal=0.4070148

G = 5.6 kcal mol<sup>-1</sup>

Center Atomic Atomic Coordinates (Angstroms)  
Number Number Type X Y Z

|    |    |   |           |           |           |
|----|----|---|-----------|-----------|-----------|
| 1  | 7  | 0 | 0.370383  | 3.032190  | 0.993107  |
| 2  | 7  | 0 | -0.330348 | 1.985892  | 0.923083  |
| 3  | 6  | 0 | -1.386676 | 1.847394  | 1.862067  |
| 4  | 6  | 0 | -2.054699 | 2.966475  | 2.380919  |
| 5  | 6  | 0 | -3.112177 | 2.769597  | 3.257258  |
| 6  | 1  | 0 | -3.648937 | 3.625034  | 3.650673  |
| 7  | 6  | 0 | -3.497315 | 1.473629  | 3.619372  |
| 8  | 6  | 0 | -2.819718 | 0.368824  | 3.106613  |
| 9  | 1  | 0 | -3.111038 | -0.640632 | 3.369174  |
| 10 | 6  | 0 | -1.760953 | 0.549316  | 2.223611  |
| 11 | 1  | 0 | -1.211455 | -0.306720 | 1.854387  |
| 12 | 6  | 0 | 1.376886  | 3.099516  | 0.014074  |
| 13 | 6  | 0 | 1.814270  | 4.365073  | -0.379716 |
| 14 | 6  | 0 | 2.738639  | 4.479007  | -1.414744 |
| 15 | 1  | 0 | 3.063477  | 5.462564  | -1.733798 |
| 16 | 6  | 0 | 3.247169  | 3.340604  | -2.046779 |
| 17 | 1  | 0 | 3.965995  | 3.443891  | -2.850812 |
| 18 | 6  | 0 | 2.850746  | 2.075193  | -1.623671 |
| 19 | 1  | 0 | 3.269038  | 1.179293  | -2.065148 |
| 20 | 6  | 0 | 1.921193  | 1.939416  | -0.591171 |
| 21 | 1  | 0 | -4.332987 | 1.330293  | 4.294809  |
| 22 | 1  | 0 | 1.400370  | 5.239850  | 0.106404  |
| 23 | 46 | 0 | 0.002680  | 0.687728  | -0.723093 |
| 24 | 16 | 0 | 0.516258  | -0.607197 | -2.549166 |
| 25 | 6  | 0 | -1.016116 | -1.640955 | -2.585100 |
| 26 | 1  | 0 | -1.131066 | -2.042520 | -3.591314 |
| 27 | 1  | 0 | -0.934548 | -2.465549 | -1.876356 |
| 28 | 6  | 0 | -2.184273 | -0.743872 | -2.217998 |
| 29 | 1  | 0 | -2.261359 | 0.064866  | -2.951807 |
| 30 | 7  | 0 | -1.894022 | -0.132025 | -0.889746 |
| 31 | 6  | 0 | -3.569598 | -1.390079 | -2.152217 |
| 32 | 1  | 0 | -1.959916 | -0.911379 | -0.184058 |
| 33 | 1  | 0 | -2.628599 | 0.531681  | -0.645872 |
| 34 | 8  | 0 | -3.645551 | -2.542174 | -2.837076 |
| 35 | 8  | 0 | -4.500272 | -0.868620 | -1.592407 |

|    |    |   |           |           |           |
|----|----|---|-----------|-----------|-----------|
| 36 | 1  | 0 | -4.541609 | -2.895261 | -2.723022 |
| 37 | 1  | 0 | 1.907820  | 0.947417  | -0.075853 |
| 38 | 7  | 0 | 3.447114  | -0.782166 | 0.356070  |
| 39 | 6  | 0 | 2.784784  | -2.066066 | 0.150477  |
| 40 | 1  | 0 | 4.400853  | -0.824390 | 0.009834  |
| 41 | 6  | 0 | 3.535892  | -3.309638 | 0.678711  |
| 42 | 1  | 0 | 2.639878  | -2.209975 | -0.926076 |
| 43 | 6  | 0 | 1.381679  | -2.007747 | 0.749043  |
| 44 | 16 | 0 | 3.906735  | -3.279792 | 2.483023  |
| 45 | 1  | 0 | 4.514547  | -3.371742 | 0.197161  |
| 46 | 1  | 0 | 2.979150  | -4.214699 | 0.436246  |
| 47 | 8  | 0 | 0.661862  | -3.058527 | 0.404662  |
| 48 | 8  | 0 | 1.003786  | -1.094495 | 1.458813  |
| 49 | 1  | 0 | 2.631467  | -3.400463 | 2.906647  |
| 50 | 1  | 0 | -0.307891 | -2.956048 | 0.681829  |
| 51 | 1  | 0 | 3.499547  | -0.586769 | 1.352963  |
| 52 | 17 | 0 | -2.244149 | -2.665471 | 0.804366  |
| 53 | 1  | 0 | -1.752232 | 3.959802  | 2.076284  |

HF=-2604.7548239\ZeroPoint=0.3770313\Thermal=0.4104443

G = 0.9 kcal mol<sup>-1</sup>

Center Atomic Atomic Coordinates (Angstroms)  
Number Number Type X Y Z

|    |    |   |           |           |           |
|----|----|---|-----------|-----------|-----------|
| 1  | 7  | 0 | -2.466104 | 1.406796  | -0.610100 |
| 2  | 7  | 0 | -2.027793 | 0.217884  | -0.517442 |
| 3  | 6  | 0 | -2.965793 | -0.750623 | -0.050327 |
| 4  | 6  | 0 | -4.333288 | -0.614515 | -0.322011 |
| 5  | 6  | 0 | -5.223540 | -1.559185 | 0.171193  |
| 6  | 1  | 0 | -6.280074 | -1.466723 | -0.052579 |
| 7  | 6  | 0 | -4.762069 | -2.629394 | 0.941720  |
| 8  | 6  | 0 | -3.400822 | -2.756940 | 1.209300  |
| 9  | 1  | 0 | -3.035908 | -3.585143 | 1.804533  |
| 10 | 6  | 0 | -2.497494 | -1.826164 | 0.707573  |
| 11 | 1  | 0 | -1.438867 | -1.926431 | 0.904904  |
| 12 | 6  | 0 | -1.512565 | 2.327310  | -1.014764 |
| 13 | 6  | 0 | -1.902927 | 3.664496  | -1.183138 |
| 14 | 6  | 0 | -0.945379 | 4.605087  | -1.537616 |
| 15 | 1  | 0 | -1.224807 | 5.643118  | -1.673364 |
| 16 | 6  | 0 | 0.385037  | 4.206661  | -1.712929 |
| 17 | 1  | 0 | 1.136104  | 4.946267  | -1.969955 |
| 18 | 6  | 0 | 0.767728  | 2.870371  | -1.548754 |
| 19 | 1  | 0 | 1.816424  | 2.610567  | -1.648381 |
| 20 | 6  | 0 | -0.169009 | 1.897499  | -1.192388 |
| 21 | 1  | 0 | -5.461622 | -3.364299 | 1.322809  |
| 22 | 1  | 0 | -2.942018 | 3.938457  | -1.040470 |
| 23 | 46 | 0 | -0.082436 | -0.134524 | -1.120356 |
| 24 | 16 | 0 | -0.229857 | -2.453421 | -1.592480 |
| 25 | 6  | 0 | 1.277526  | -2.501237 | -2.659334 |
| 26 | 1  | 0 | 1.044201  | -2.103694 | -3.650682 |
| 27 | 1  | 0 | 1.606418  | -3.534934 | -2.772478 |
| 28 | 6  | 0 | 2.400227  | -1.678584 | -2.032954 |
| 29 | 1  | 0 | 3.255101  | -1.625427 | -2.717847 |
| 30 | 7  | 0 | 1.913848  | -0.290405 | -1.753572 |
| 31 | 6  | 0 | 2.935943  | -2.398034 | -0.799810 |
| 32 | 1  | 0 | 2.533837  | 0.198676  | -1.084256 |

|    |    |   |           |           |           |
|----|----|---|-----------|-----------|-----------|
| 33 | 1  | 0 | 1.966821  | 0.243629  | -2.618798 |
| 34 | 8  | 0 | 2.750546  | -1.720172 | 0.341138  |
| 35 | 8  | 0 | 3.487793  | -3.465152 | -0.872883 |
| 36 | 1  | 0 | 3.175617  | -2.196989 | 1.073206  |
| 37 | 1  | 0 | 0.546020  | 1.377421  | 0.730283  |
| 38 | 7  | 0 | 0.999490  | 1.742262  | 1.595531  |
| 39 | 6  | 0 | 0.582301  | 0.954554  | 2.791475  |
| 40 | 1  | 0 | 0.721898  | 2.720959  | 1.661162  |
| 41 | 6  | 0 | 1.201487  | -0.443857 | 2.774607  |
| 42 | 1  | 0 | 0.922300  | 1.495030  | 3.679408  |
| 43 | 6  | 0 | -0.948976 | 0.884462  | 2.872480  |
| 44 | 16 | 0 | 2.956208  | -0.497395 | 3.310267  |
| 45 | 1  | 0 | 0.654552  | -1.061674 | 3.485149  |
| 46 | 1  | 0 | 1.093764  | -0.888633 | 1.783564  |
| 47 | 8  | 0 | -1.520020 | 1.935695  | 2.249171  |
| 48 | 8  | 0 | -1.554829 | 0.021389  | 3.443082  |
| 49 | 1  | 0 | 3.474425  | 0.157231  | 2.234061  |
| 50 | 1  | 0 | 2.051215  | 1.703969  | 1.339056  |
| 51 | 1  | 0 | -4.674717 | 0.215667  | -0.925774 |
| 52 | 1  | 0 | -2.484452 | 1.828956  | 2.263177  |
| 53 | 17 | 0 | 3.655288  | 1.579640  | 0.303184  |

HF=-2604.7671278\ZeroPoint=0.3791684\Thermal=0.4116516

G = 14.6 kcal mol<sup>-1</sup>

Center Atomic Atomic Coordinates (Angstroms)  
Number Number Type X Y Z

|    |    |   |           |           |           |
|----|----|---|-----------|-----------|-----------|
| 1  | 7  | 0 | -2.383259 | 1.380537  | -0.605904 |
| 2  | 7  | 0 | -1.916831 | 0.205072  | -0.505734 |
| 3  | 6  | 0 | -2.850183 | -0.816164 | -0.165968 |
| 4  | 6  | 0 | -4.214723 | -0.673651 | -0.453373 |
| 5  | 6  | 0 | -5.094803 | -1.682005 | -0.088080 |
| 6  | 1  | 0 | -6.148356 | -1.583844 | -0.322621 |
| 7  | 6  | 0 | -4.627219 | -2.823638 | 0.569320  |
| 8  | 6  | 0 | -3.270214 | -2.957716 | 0.852306  |
| 9  | 1  | 0 | -2.902630 | -3.838904 | 1.363687  |
| 10 | 6  | 0 | -2.375717 | -1.961455 | 0.478159  |
| 11 | 1  | 0 | -1.321901 | -2.058969 | 0.698323  |
| 12 | 6  | 0 | -1.434755 | 2.348776  | -0.909915 |
| 13 | 6  | 0 | -1.887932 | 3.584788  | -1.384975 |
| 14 | 6  | 0 | -0.958267 | 4.544356  | -1.767465 |
| 15 | 1  | 0 | -1.295790 | 5.499673  | -2.151932 |
| 16 | 6  | 0 | 0.411862  | 4.279086  | -1.656263 |
| 17 | 1  | 0 | 1.130790  | 5.037550  | -1.945891 |
| 18 | 6  | 0 | 0.863314  | 3.061683  | -1.147447 |
| 19 | 1  | 0 | 1.924773  | 2.891991  | -0.990444 |
| 20 | 6  | 0 | -0.046198 | 2.069806  | -0.749944 |
| 21 | 1  | 0 | -5.320548 | -3.607183 | 0.852222  |
| 22 | 1  | 0 | -2.953148 | 3.759306  | -1.479822 |
| 23 | 46 | 0 | 0.075985  | -0.061371 | -0.992615 |
| 24 | 16 | 0 | -0.127664 | -2.172000 | -1.945126 |
| 25 | 6  | 0 | 1.500955  | -2.200235 | -2.818051 |
| 26 | 1  | 0 | 1.418520  | -1.680645 | -3.775965 |
| 27 | 1  | 0 | 1.775212  | -3.239013 | -3.006528 |
| 28 | 6  | 0 | 2.558775  | -1.527094 | -1.952665 |
| 29 | 1  | 0 | 3.498791  | -1.428808 | -2.509099 |



|    |    |   |           |           |           |
|----|----|---|-----------|-----------|-----------|
| 30 | 7  | 0 | 2.076161  | -0.169929 | -1.564483 |
| 31 | 6  | 0 | 2.902275  | -2.411568 | -0.755981 |
| 32 | 1  | 0 | 2.676412  | 0.266389  | -0.824435 |
| 33 | 1  | 0 | 2.163630  | 0.441409  | -2.374803 |
| 34 | 8  | 0 | 2.625145  | -1.834946 | 0.417100  |
| 35 | 8  | 0 | 3.390054  | -3.504099 | -0.889247 |
| 36 | 1  | 0 | 2.938941  | -2.388412 | 1.151284  |
| 37 | 1  | 0 | 0.333607  | 1.585627  | 0.434160  |
| 38 | 7  | 0 | 0.803461  | 1.755104  | 1.805749  |
| 39 | 6  | 0 | 0.274437  | 0.857516  | 2.844885  |
| 40 | 1  | 0 | 0.593597  | 2.727327  | 2.012996  |
| 41 | 6  | 0 | 0.876068  | -0.545198 | 2.739318  |
| 42 | 1  | 0 | 0.500199  | 1.255082  | 3.844010  |
| 43 | 6  | 0 | -1.253575 | 0.802979  | 2.772697  |
| 44 | 16 | 0 | 2.587829  | -0.679570 | 3.392718  |
| 45 | 1  | 0 | 0.274984  | -1.228642 | 3.337076  |
| 46 | 1  | 0 | 0.854049  | -0.886575 | 1.703789  |
| 47 | 8  | 0 | -1.772330 | 1.976462  | 2.342050  |
| 48 | 8  | 0 | -1.929982 | -0.138287 | 3.093287  |
| 49 | 1  | 0 | 3.199702  | 0.023587  | 2.398143  |
| 50 | 1  | 0 | 1.826019  | 1.670410  | 1.665514  |
| 51 | 1  | 0 | -4.560864 | 0.212090  | -0.968426 |
| 52 | 1  | 0 | -2.736827 | 1.882816  | 2.306425  |
| 53 | 17 | 0 | 3.674616  | 1.485046  | 0.531112  |

HF=-2604.7431944\ZeroPoint=0.3752452\Thermal=0.4072524

G = 8.6 kcal mol<sup>-1</sup>

| Center Number | Atomic Number | Atomic Type | Coordinates (Angstroms) |           |           |
|---------------|---------------|-------------|-------------------------|-----------|-----------|
|               |               |             | X                       | Y         | Z         |
| 1             | 7             | 0           | -2.151534               | 1.866070  | -0.046122 |
| 2             | 7             | 0           | -1.683138               | 0.793720  | -0.514109 |
| 3             | 6             | 0           | -2.641153               | -0.200908 | -0.877120 |
| 4             | 6             | 0           | -3.988000               | 0.129006  | -1.090107 |
| 5             | 6             | 0           | -4.890540               | -0.875895 | -1.404697 |
| 6             | 1             | 0           | -5.929601               | -0.624652 | -1.583308 |
| 7             | 6             | 0           | -4.465969               | -2.205960 | -1.497464 |
| 8             | 6             | 0           | -3.129031               | -2.525695 | -1.283916 |
| 9             | 1             | 0           | -2.795642               | -3.554273 | -1.337710 |
| 10            | 6             | 0           | -2.210629               | -1.524751 | -0.984662 |
| 11            | 1             | 0           | -1.172885               | -1.771565 | -0.810040 |
| 12            | 6             | 0           | -1.206613               | 2.807155  | 0.374168  |
| 13            | 6             | 0           | -1.566479               | 4.157397  | 0.322980  |
| 14            | 6             | 0           | -0.629594               | 5.123789  | 0.675000  |
| 15            | 1             | 0           | -0.895368               | 6.172825  | 0.615670  |
| 16            | 6             | 0           | 0.646483                | 4.751099  | 1.109228  |
| 17            | 1             | 0           | 1.361679                | 5.513631  | 1.395285  |
| 18            | 6             | 0           | 0.994516                | 3.403689  | 1.209099  |
| 19            | 1             | 0           | 1.957290                | 3.082522  | 1.592217  |
| 20            | 6             | 0           | 0.070612                | 2.425213  | 0.845983  |
| 21            | 1             | 0           | -5.179200               | -2.986196 | -1.736065 |
| 22            | 1             | 0           | -2.557036               | 4.428503  | -0.021066 |
| 23            | 46            | 0           | 0.380765                | 0.653094  | -0.800451 |
| 24            | 16            | 0           | 0.311585                | -0.367239 | -2.856474 |
| 25            | 6             | 0           | 2.079873                | -0.122408 | -3.342202 |
| 26            | 1             | 0           | 2.209328                | 0.863373  | -3.794475 |

|    |    |   |           |           |           |
|----|----|---|-----------|-----------|-----------|
| 27 | 1  | 0 | 2.334831  | -0.887421 | -4.077111 |
| 28 | 6  | 0 | 2.958538  | -0.254029 | -2.106803 |
| 29 | 1  | 0 | 3.993869  | 0.020311  | -2.344052 |
| 30 | 7  | 0 | 2.435261  | 0.663837  | -1.056130 |
| 31 | 6  | 0 | 3.030377  | -1.711414 | -1.647696 |
| 32 | 1  | 0 | 2.835464  | 0.501150  | -0.094848 |
| 33 | 1  | 0 | 2.688463  | 1.620208  | -1.300601 |
| 34 | 8  | 0 | 2.622696  | -1.863349 | -0.388282 |
| 35 | 8  | 0 | 3.442895  | -2.587296 | -2.363320 |
| 36 | 1  | 0 | 2.769394  | -2.768464 | -0.062800 |
| 37 | 1  | 0 | 0.238048  | 1.385371  | 1.195029  |
| 38 | 7  | 0 | -0.059966 | -0.159106 | 2.698755  |
| 39 | 6  | 0 | -0.496680 | -1.548267 | 2.767222  |
| 40 | 1  | 0 | -0.535683 | 0.409235  | 3.391137  |
| 41 | 6  | 0 | 0.376841  | -2.439731 | 1.873374  |
| 42 | 1  | 0 | -0.460642 | -1.968841 | 3.785898  |
| 43 | 6  | 0 | -1.961602 | -1.704893 | 2.356252  |
| 44 | 16 | 0 | 2.034337  | -2.826491 | 2.568050  |
| 45 | 1  | 0 | -0.115569 | -3.401373 | 1.736192  |
| 46 | 1  | 0 | 0.505413  | -1.963539 | 0.899836  |
| 47 | 8  | 0 | -2.651029 | -0.540737 | 2.380973  |
| 48 | 8  | 0 | -2.480059 | -2.757122 | 2.074056  |
| 49 | 1  | 0 | 2.590707  | -1.596447 | 2.372439  |
| 50 | 1  | 0 | 0.944483  | -0.072881 | 2.855595  |
| 51 | 1  | 0 | -4.302956 | 1.160487  | -1.013430 |
| 52 | 1  | 0 | -3.563544 | -0.745757 | 2.125157  |
| 53 | 17 | 0 | 3.114301  | 0.704538  | 1.920621  |

HF=-2604.7524933\ZeroPoint=0.3780734\Thermal=0.411019

G = 0.7 kcal mol<sup>-1</sup>

| Center Number | Atomic Number | Atomic Type | Coordinates (Angstroms) |           |           |
|---------------|---------------|-------------|-------------------------|-----------|-----------|
|               |               |             | X                       | Y         | Z         |
| 1             | 46            | 0           | 0.325758                | 0.276084  | -0.837691 |
| 2             | 7             | 0           | 2.284223                | 0.281440  | -0.166661 |
| 3             | 7             | 0           | 2.822030                | 1.401229  | 0.083047  |
| 4             | 6             | 0           | 1.957150                | 2.480285  | -0.044539 |
| 5             | 6             | 0           | 0.601738                | 2.239801  | -0.398656 |
| 6             | 6             | 0           | -0.230911               | 3.356275  | -0.493327 |
| 7             | 1             | 0           | -1.279619               | 3.241411  | -0.750291 |
| 8             | 6             | 0           | 0.256867                | 4.644645  | -0.242852 |
| 9             | 6             | 0           | 1.595026                | 4.852515  | 0.103427  |
| 10            | 1             | 0           | 1.958570                | 5.855352  | 0.293263  |
| 11            | 6             | 0           | 2.455009                | 3.766007  | 0.205583  |
| 12            | 1             | 0           | 3.498591                | 3.890420  | 0.470417  |
| 13            | 6             | 0           | 3.143054                | -0.852119 | -0.035022 |
| 14            | 6             | 0           | 4.480375                | -0.779960 | -0.439840 |
| 15            | 6             | 0           | 5.297626                | -1.894135 | -0.295380 |
| 16            | 1             | 0           | 6.329622                | -1.847219 | -0.623561 |
| 17            | 6             | 0           | 4.792540                | -3.070933 | 0.261768  |
| 18            | 1             | 0           | 5.433730                | -3.938141 | 0.370036  |
| 19            | 6             | 0           | 3.461171                | -3.131873 | 0.669536  |
| 20            | 1             | 0           | 3.062327                | -4.041710 | 1.101988  |
| 21            | 6             | 0           | 2.628916                | -2.027720 | 0.515100  |
| 22            | 1             | 0           | 1.593722                | -2.070648 | 0.824416  |
| 23            | 16            | 0           | 0.095603                | -1.982618 | -1.544298 |

|    |    |   |           |           |           |    |    |   |           |           |           |
|----|----|---|-----------|-----------|-----------|----|----|---|-----------|-----------|-----------|
| 24 | 6  | 0 | -1.558940 | -1.802338 | -2.339675 | 23 | 16 | 0 | 0.301789  | -1.865217 | -1.780271 |
| 25 | 1  | 0 | -2.066554 | -2.767293 | -2.331720 | 24 | 6  | 0 | -1.407350 | -1.863697 | -2.480344 |
| 26 | 1  | 0 | -1.434191 | -1.490294 | -3.381440 | 25 | 1  | 0 | -1.734303 | -2.898538 | -2.588116 |
| 27 | 6  | 0 | -2.407780 | -0.772253 | -1.589533 | 26 | 1  | 0 | -1.399852 | -1.396706 | -3.469548 |
| 28 | 1  | 0 | -2.624154 | -1.142054 | -0.585950 | 27 | 6  | 0 | -2.350889 | -1.099934 | -1.549330 |
| 29 | 7  | 0 | -1.659567 | 0.502718  | -1.448881 | 28 | 1  | 0 | -2.456961 | -1.637373 | -0.605257 |
| 30 | 1  | 0 | -1.704749 | 1.017698  | -2.327953 | 29 | 7  | 0 | -1.775735 | 0.233055  | -1.252642 |
| 31 | 6  | 0 | -3.719298 | -0.516592 | -2.315796 | 30 | 1  | 0 | -1.915400 | 0.846338  | -2.055704 |
| 32 | 8  | 0 | -3.967386 | 0.473761  | -2.960425 | 31 | 6  | 0 | -3.719526 | -0.937682 | -2.194494 |
| 33 | 8  | 0 | -4.566765 | -1.555054 | -2.186981 | 32 | 8  | 0 | -4.106468 | 0.068872  | -2.734840 |
| 34 | 1  | 0 | -0.415241 | 5.493338  | -0.315742 | 33 | 8  | 0 | -4.432535 | -2.078094 | -2.131974 |
| 35 | 1  | 0 | -5.365900 | -1.354214 | -2.697922 | 34 | 1  | 0 | -0.767902 | 5.413476  | -0.751556 |
| 36 | 1  | 0 | -2.120643 | 1.067887  | -0.732837 | 35 | 1  | 0 | -5.276242 | -1.930076 | -2.586435 |
| 37 | 1  | 0 | 4.854912  | 0.138605  | -0.872140 | 36 | 1  | 0 | -2.254697 | 0.662266  | -0.435580 |
| 38 | 1  | 0 | -0.323922 | 1.440602  | 1.428861  | 37 | 1  | 0 | 4.814642  | 0.362044  | -0.770739 |
| 39 | 1  | 0 | -3.482875 | -0.383221 | 3.079712  | 38 | 1  | 0 | -0.077335 | 1.528135  | 0.895418  |
| 40 | 6  | 0 | -2.435235 | -0.158640 | 3.284278  | 39 | 1  | 0 | -3.359918 | -0.330139 | 3.077040  |
| 41 | 6  | 0 | -1.642849 | -1.470491 | 3.385059  | 40 | 6  | 0 | -2.329140 | -0.044859 | 3.295026  |
| 42 | 7  | 0 | -2.348758 | 0.546780  | 4.566345  | 41 | 6  | 0 | -1.472818 | -1.301112 | 3.488535  |
| 43 | 6  | 0 | -1.939865 | 0.681901  | 2.111069  | 42 | 7  | 0 | -2.312427 | 0.714729  | 4.553844  |
| 44 | 1  | 0 | -0.593195 | -1.261361 | 3.596155  | 43 | 6  | 0 | -1.815271 | 0.779235  | 2.101338  |
| 45 | 1  | 0 | -2.047872 | -2.044759 | 4.218784  | 44 | 1  | 0 | -0.463033 | -1.016906 | 3.786306  |
| 46 | 16 | 0 | -1.759164 | -2.567520 | 1.912694  | 45 | 1  | 0 | -1.907296 | -1.916069 | 4.277558  |
| 47 | 1  | 0 | -1.404055 | 0.880964  | 4.731174  | 46 | 16 | 0 | -1.353531 | -2.392576 | 2.007047  |
| 48 | 1  | 0 | -2.970718 | 1.348157  | 4.588155  | 47 | 1  | 0 | -1.398076 | 1.142000  | 4.677930  |
| 49 | 8  | 0 | -0.645592 | 0.997300  | 2.243015  | 48 | 1  | 0 | -2.992793 | 1.467502  | 4.519302  |
| 50 | 8  | 0 | -2.629641 | 1.034755  | 1.175571  | 49 | 8  | 0 | -0.563743 | 1.046228  | 2.134674  |
| 51 | 1  | 0 | -0.883667 | -1.928699 | 1.102443  | 50 | 8  | 0 | -2.606205 | 1.119661  | 1.197375  |
|    |    |   |           |           |           | 51 | 1  | 0 | -0.608649 | -1.558353 | 1.251514  |

HF=-2143.9082694\ZeroPoint=0.3689063\Thermal=0.4000296

HF=-2143.8808618\ZeroPoint=0.3653626\Thermal=0.3955837

G = 17.5 kcal mol<sup>-1</sup>

G = 14.9 kcal mol<sup>-1</sup>

| Center Number | Atomic Number | Atomic Type | Coordinates (Angstroms) |           |           |
|---------------|---------------|-------------|-------------------------|-----------|-----------|
|               |               |             | X                       | Y         | Z         |
| 1             | 46            | 0           | 0.224945                | 0.191040  | -0.714280 |
| 2             | 7             | 0           | 2.209019                | 0.351238  | -0.149863 |
| 3             | 7             | 0           | 2.683820                | 1.517663  | -0.037440 |
| 4             | 6             | 0           | 1.745590                | 2.540157  | -0.177102 |
| 5             | 6             | 0           | 0.354877                | 2.272265  | -0.052564 |
| 6             | 6             | 0           | -0.534656               | 3.329631  | -0.273881 |
| 7             | 1             | 0           | -1.595374               | 3.150511  | -0.129428 |
| 8             | 6             | 0           | -0.065148               | 4.603067  | -0.592805 |
| 9             | 6             | 0           | 1.309245                | 4.851563  | -0.676307 |
| 10            | 1             | 0           | 1.665779                | 5.848231  | -0.908748 |
| 11            | 6             | 0           | 2.221647                | 3.825343  | -0.456502 |
| 12            | 1             | 0           | 3.289684                | 3.992931  | -0.526990 |
| 13            | 6             | 0           | 3.133883                | -0.721244 | 0.018727  |
| 14            | 6             | 0           | 4.478843                | -0.572964 | -0.342847 |
| 15            | 6             | 0           | 5.352256                | -1.635985 | -0.159826 |
| 16            | 1             | 0           | 6.390400                | -1.532524 | -0.453360 |
| 17            | 6             | 0           | 4.896952                | -2.835980 | 0.393346  |
| 18            | 1             | 0           | 5.584441                | -3.662057 | 0.534022  |
| 19            | 6             | 0           | 3.558819                | -2.972973 | 0.756002  |
| 20            | 1             | 0           | 3.199802                | -3.899409 | 1.187660  |
| 21            | 6             | 0           | 2.668179                | -1.922034 | 0.560160  |
| 22            | 1             | 0           | 1.629386                | -2.025339 | 0.841184  |

| Center Number | Atomic Number | Atomic Type | Coordinates (Angstroms) |           |           |
|---------------|---------------|-------------|-------------------------|-----------|-----------|
|               |               |             | X                       | Y         | Z         |
| 1             | 46            | 0           | 0.340571                | 0.384158  | -0.549785 |
| 2             | 7             | 0           | 2.315396                | 0.242208  | 0.080349  |
| 3             | 7             | 0           | 2.886125                | 1.309400  | 0.435095  |
| 4             | 6             | 0           | 2.039974                | 2.427064  | 0.513604  |
| 5             | 6             | 0           | 0.658399                | 2.292665  | 0.786106  |
| 6             | 6             | 0           | -0.154788               | 3.426175  | 0.788875  |
| 7             | 1             | 0           | -1.207234               | 3.297304  | 1.020336  |
| 8             | 6             | 0           | 0.399500                | 4.680168  | 0.536655  |
| 9             | 6             | 0           | 1.773552                | 4.808559  | 0.307393  |
| 10            | 1             | 0           | 2.200579                | 5.788415  | 0.127950  |
| 11            | 6             | 0           | 2.601941                | 3.689705  | 0.308724  |
| 12            | 1             | 0           | 3.665418                | 3.774265  | 0.121511  |
| 13            | 6             | 0           | 3.129647                | -0.927341 | 0.035231  |
| 14            | 6             | 0           | 4.503017                | -0.843502 | -0.226415 |
| 15            | 6             | 0           | 5.257856                | -2.007455 | -0.257293 |
| 16            | 1             | 0           | 6.317863                | -1.952785 | -0.475935 |
| 17            | 6             | 0           | 4.655798                | -3.245495 | -0.014015 |
| 18            | 1             | 0           | 5.252200                | -4.150204 | -0.038533 |
| 19            | 6             | 0           | 3.290198                | -3.318667 | 0.252140  |
| 20            | 1             | 0           | 2.818924                | -4.274647 | 0.445123  |
| 21            | 6             | 0           | 2.517554                | -2.161876 | 0.266137  |

|    |    |   |           |           |           |
|----|----|---|-----------|-----------|-----------|
| 22 | 1  | 0 | 1.458039  | -2.210902 | 0.476313  |
| 23 | 16 | 0 | 0.351130  | -1.268963 | -2.141432 |
| 24 | 6  | 0 | -1.308791 | -0.949725 | -2.889439 |
| 25 | 1  | 0 | -1.682324 | -1.891918 | -3.292660 |
| 26 | 1  | 0 | -1.209447 | -0.231465 | -3.707876 |
| 27 | 6  | 0 | -2.253030 | -0.403371 | -1.818631 |
| 28 | 1  | 0 | -2.460602 | -1.174678 | -1.074331 |
| 29 | 7  | 0 | -1.602507 | 0.734591  | -1.129159 |
| 30 | 1  | 0 | -1.651133 | 1.561333  | -1.725241 |
| 31 | 6  | 0 | -3.558886 | 0.058373  | -2.448703 |
| 32 | 8  | 0 | -3.821330 | 1.205202  | -2.714058 |
| 33 | 8  | 0 | -4.368741 | -0.981092 | -2.723661 |
| 34 | 1  | 0 | -0.229863 | 5.562566  | 0.541951  |
| 35 | 1  | 0 | -5.167457 | -0.634675 | -3.150706 |
| 36 | 1  | 0 | -2.098109 | 0.951865  | -0.221242 |
| 37 | 1  | 0 | 4.952282  | 0.122537  | -0.413409 |
| 38 | 1  | 0 | 0.234308  | 1.382473  | 1.291788  |
| 39 | 1  | 0 | -3.815156 | -0.947871 | 2.288906  |
| 40 | 6  | 0 | -2.851970 | -0.885537 | 2.799657  |
| 41 | 6  | 0 | -2.167168 | -2.253025 | 2.780946  |
| 42 | 7  | 0 | -3.105793 | -0.526106 | 4.206957  |
| 43 | 6  | 0 | -1.997238 | 0.181634  | 2.081582  |
| 44 | 1  | 0 | -1.242285 | -2.212427 | 3.356841  |
| 45 | 1  | 0 | -2.825649 | -3.000661 | 3.225260  |
| 46 | 16 | 0 | -1.758200 | -2.876452 | 1.092911  |
| 47 | 1  | 0 | -2.222625 | -0.293263 | 4.655073  |
| 48 | 1  | 0 | -3.685794 | 0.306628  | 4.248637  |
| 49 | 8  | 0 | -0.759703 | 0.162057  | 2.307895  |
| 50 | 8  | 0 | -2.600731 | 1.001566  | 1.326226  |
| 51 | 1  | 0 | -0.816948 | -1.949146 | 0.827421  |

HF=-2143.8840857\ZeroPoint=0.3675981\Thermal=0.3986411

G = 5.7 kcal mol<sup>-1</sup>

| Center Number | Atomic Number | Atomic Type | Coordinates (Angstroms) |           |           |
|---------------|---------------|-------------|-------------------------|-----------|-----------|
|               |               |             | X                       | Y         | Z         |
| 1             | 46            | 0           | 0.881283                | -0.202947 | -0.888704 |
| 2             | 7             | 0           | 2.091125                | 1.028399  | 0.241837  |
| 3             | 7             | 0           | 1.978318                | 2.281526  | 0.086208  |
| 4             | 6             | 0           | 0.967780                | 2.647467  | -0.790641 |
| 5             | 6             | 0           | 0.142316                | 1.636782  | -1.357506 |
| 6             | 6             | 0           | -0.850427               | 2.066156  | -2.242638 |
| 7             | 1             | 0           | -1.529820               | 1.349736  | -2.690899 |
| 8             | 6             | 0           | -1.026340               | 3.424147  | -2.531385 |
| 9             | 6             | 0           | -0.207407               | 4.396820  | -1.949801 |
| 10            | 1             | 0           | -0.356015               | 5.444728  | -2.182029 |
| 11            | 6             | 0           | 0.797228                | 4.010208  | -1.072392 |
| 12            | 1             | 0           | 1.456722                | 4.734719  | -0.608773 |
| 13            | 6             | 0           | 3.110846                | 0.613499  | 1.151243  |
| 14            | 6             | 0           | 4.318795                | 1.316015  | 1.233343  |
| 15            | 6             | 0           | 5.290806                | 0.898949  | 2.133448  |
| 16            | 1             | 0           | 6.233922                | 1.430611  | 2.187397  |
| 17            | 6             | 0           | 5.060259                | -0.204137 | 2.958887  |
| 18            | 1             | 0           | 5.823301                | -0.527216 | 3.657758  |
| 19            | 6             | 0           | 3.852844                | -0.894455 | 2.874769  |
| 20            | 1             | 0           | 3.669469                | -1.753200 | 3.509605  |

|    |    |   |           |           |           |
|----|----|---|-----------|-----------|-----------|
| 21 | 6  | 0 | 2.876614  | -0.495998 | 1.966305  |
| 22 | 1  | 0 | 1.941281  | -1.033133 | 1.886293  |
| 23 | 16 | 0 | 2.039556  | -2.271105 | -0.630093 |
| 24 | 6  | 0 | 1.018907  | -3.262558 | -1.806297 |
| 25 | 1  | 0 | 1.424539  | -3.178166 | -2.819595 |
| 26 | 1  | 0 | 1.051693  | -4.313523 | -1.515617 |
| 27 | 6  | 0 | -0.432557 | -2.789077 | -1.810835 |
| 28 | 1  | 0 | -0.991984 | -3.307417 | -2.599597 |
| 29 | 7  | 0 | -0.459110 | -1.314980 | -2.071445 |
| 30 | 1  | 0 | -1.401841 | -0.939221 | -1.948285 |
| 31 | 6  | 0 | -1.144887 | -3.166263 | -0.508719 |
| 32 | 8  | 0 | -1.416649 | -2.110357 | 0.252836  |
| 33 | 8  | 0 | -1.436006 | -4.308127 | -0.251435 |
| 34 | 1  | 0 | -1.815934 | 3.726438  | -3.211736 |
| 35 | 1  | 0 | -0.193482 | -1.152013 | -3.040916 |
| 36 | 1  | 0 | 4.482531  | 2.166518  | 0.584910  |
| 37 | 1  | 0 | -1.335934 | 0.939033  | 0.081285  |
| 38 | 16 | 0 | -4.401255 | 1.601534  | 2.860748  |
| 39 | 6  | 0 | -5.038943 | 0.524457  | 1.513662  |
| 40 | 1  | 0 | -5.901571 | 0.024797  | 1.960653  |
| 41 | 1  | 0 | -5.408045 | 1.137421  | 0.688663  |
| 42 | 6  | 0 | -4.070333 | -0.557833 | 0.974784  |
| 43 | 1  | 0 | -4.659359 | -1.221971 | 0.338281  |
| 44 | 7  | 0 | -3.403703 | -1.385171 | 1.991649  |
| 45 | 6  | 0 | -3.026865 | 0.048842  | 0.036074  |
| 46 | 8  | 0 | -2.070032 | 0.700677  | 0.694316  |
| 47 | 8  | 0 | -3.085252 | -0.054516 | -1.171057 |
| 48 | 1  | 0 | -4.093633 | -1.931792 | 2.499023  |
| 49 | 1  | 0 | -3.395374 | 2.160945  | 2.159606  |
| 50 | 1  | 0 | -2.943784 | -0.782530 | 2.671644  |
| 51 | 1  | 0 | -2.023224 | -2.294046 | 1.013364  |

HF=-2143.9025326\ZeroPoint=0.3692364\Thermal=0.3995489

G = 18.3 kcal mol<sup>-1</sup>

| Center Number | Atomic Number | Atomic Type | Coordinates (Angstroms) |           |           |
|---------------|---------------|-------------|-------------------------|-----------|-----------|
|               |               |             | X                       | Y         | Z         |
| 1             | 46            | 0           | 0.735128                | -0.086902 | -0.961054 |
| 2             | 7             | 0           | 1.976722                | 0.864948  | 0.377416  |
| 3             | 7             | 0           | 1.973748                | 2.131009  | 0.389942  |
| 4             | 6             | 0           | 1.030117                | 2.704891  | -0.456152 |
| 5             | 6             | 0           | -0.052877               | 1.929599  | -0.961154 |
| 6             | 6             | 0           | -0.924757               | 2.558829  | -1.859835 |
| 7             | 1             | 0           | -1.789036               | 2.007809  | -2.214837 |
| 8             | 6             | 0           | -0.743595               | 3.891629  | -2.226306 |
| 9             | 6             | 0           | 0.308136                | 4.641157  | -1.687609 |
| 10            | 1             | 0           | 0.431573                | 5.681232  | -1.966052 |
| 11            | 6             | 0           | 1.192226                | 4.054575  | -0.790612 |
| 12            | 1             | 0           | 2.021345                | 4.609295  | -0.367768 |
| 13            | 6             | 0           | 2.882539                | 0.227820  | 1.274238  |
| 14            | 6             | 0           | 4.088968                | 0.841255  | 1.636138  |
| 15            | 6             | 0           | 4.941317                | 0.194678  | 2.520017  |
| 16            | 1             | 0           | 5.883651                | 0.656824  | 2.790441  |
| 17            | 6             | 0           | 4.591704                | -1.048682 | 3.054829  |
| 18            | 1             | 0           | 5.261877                | -1.548338 | 3.744930  |
| 19            | 6             | 0           | 3.387920                | -1.649161 | 2.693625  |

|    |    |   |           |           |           |
|----|----|---|-----------|-----------|-----------|
| 20 | 1  | 0 | 3.114235  | -2.613792 | 3.104050  |
| 21 | 6  | 0 | 2.531458  | -1.021967 | 1.793106  |
| 22 | 1  | 0 | 1.599041  | -1.483597 | 1.497823  |
| 23 | 16 | 0 | 1.977295  | -2.027652 | -1.318034 |
| 24 | 6  | 0 | 0.737078  | -2.998894 | -2.296703 |
| 25 | 1  | 0 | 1.020935  | -2.972791 | -3.352734 |
| 26 | 1  | 0 | 0.775327  | -4.039481 | -1.968612 |
| 27 | 6  | 0 | -0.685157 | -2.451113 | -2.160448 |
| 28 | 1  | 0 | -1.311216 | -2.849775 | -2.964403 |
| 29 | 7  | 0 | -0.626075 | -0.959602 | -2.277560 |
| 30 | 1  | 0 | -1.547674 | -0.538664 | -2.081264 |
| 31 | 6  | 0 | -1.415768 | -2.859925 | -0.869456 |
| 32 | 8  | 0 | -0.965506 | -2.243467 | 0.212446  |
| 33 | 8  | 0 | -2.325720 | -3.657821 | -0.890489 |
| 34 | 1  | 0 | -1.438799 | 4.359976  | -2.914520 |
| 35 | 1  | 0 | -0.352838 | -0.709665 | -3.225822 |
| 36 | 1  | 0 | 4.343623  | 1.803755  | 1.213232  |
| 37 | 1  | 0 | -0.783686 | 1.173400  | -0.123323 |
| 38 | 16 | 0 | -3.973366 | 1.322745  | 3.133257  |
| 39 | 6  | 0 | -4.635980 | 0.255259  | 1.785336  |
| 40 | 1  | 0 | -5.400180 | -0.353930 | 2.274618  |
| 41 | 1  | 0 | -5.135352 | 0.872543  | 1.035855  |
| 42 | 6  | 0 | -3.614720 | -0.669182 | 1.089674  |
| 43 | 1  | 0 | -4.176084 | -1.342997 | 0.438483  |
| 44 | 7  | 0 | -2.799325 | -1.500911 | 1.994915  |
| 45 | 6  | 0 | -2.683169 | 0.133258  | 0.161596  |
| 46 | 8  | 0 | -1.724826 | 0.750518  | 0.748644  |
| 47 | 8  | 0 | -2.902811 | 0.121382  | -1.059899 |
| 48 | 1  | 0 | -3.398415 | -2.109950 | 2.545838  |
| 49 | 1  | 0 | -2.980287 | 1.877941  | 2.408120  |
| 50 | 1  | 0 | -2.305474 | -0.892849 | 2.646157  |
| 51 | 1  | 0 | -1.648537 | -2.228112 | 0.964392  |

HF=-2143.8804983\ZeroPoint=0.3653791\Thermal=0.3948417

G = 13.7 kcal mol<sup>-1</sup>

| Center Number | Atomic Number | Atomic Type | Coordinates (Angstroms) |           |           |
|---------------|---------------|-------------|-------------------------|-----------|-----------|
|               |               |             | X                       | Y         | Z         |
| 1             | 46            | 0           | 0.764751                | 0.131514  | -0.833800 |
| 2             | 7             | 0           | 2.171810                | 0.464808  | 0.648588  |
| 3             | 7             | 0           | 2.470023                | 1.659358  | 0.927533  |
| 4             | 6             | 0           | 1.681542                | 2.618354  | 0.278500  |
| 5             | 6             | 0           | 0.348844                | 2.338558  | -0.106704 |
| 6             | 6             | 0           | -0.384831               | 3.302528  | -0.798809 |
| 7             | 1             | 0           | -1.413154               | 3.067864  | -1.053291 |
| 8             | 6             | 0           | 0.197834                | 4.532126  | -1.100490 |
| 9             | 6             | 0           | 1.503824                | 4.815120  | -0.685098 |
| 10            | 1             | 0           | 1.943621                | 5.780179  | -0.908685 |
| 11            | 6             | 0           | 2.245029                | 3.870560  | 0.018173  |
| 12            | 1             | 0           | 3.259699                | 4.072745  | 0.338650  |
| 13            | 6             | 0           | 2.889545                | -0.553064 | 1.340492  |
| 14            | 6             | 0           | 4.172278                | -0.317857 | 1.853176  |
| 15            | 6             | 0           | 4.828315                | -1.336934 | 2.527934  |
| 16            | 1             | 0           | 5.826937                | -1.168234 | 2.913569  |
| 17            | 6             | 0           | 4.208647                | -2.577787 | 2.706451  |
| 18            | 1             | 0           | 4.726961                | -3.368780 | 3.236193  |

|    |    |   |           |           |           |
|----|----|---|-----------|-----------|-----------|
| 19 | 6  | 0 | 2.931420  | -2.801066 | 2.197578  |
| 20 | 1  | 0 | 2.448995  | -3.761392 | 2.333641  |
| 21 | 6  | 0 | 2.267989  | -1.795359 | 1.500936  |
| 22 | 1  | 0 | 1.278251  | -1.959956 | 1.095386  |
| 23 | 16 | 0 | 1.737049  | -1.714091 | -1.808812 |
| 24 | 6  | 0 | 0.428762  | -2.133043 | -3.057372 |
| 25 | 1  | 0 | 0.751314  | -1.772195 | -4.037696 |
| 26 | 1  | 0 | 0.344426  | -3.220311 | -3.108127 |
| 27 | 6  | 0 | -0.917419 | -1.499939 | -2.710959 |
| 28 | 1  | 0 | -1.567275 | -1.511694 | -3.590928 |
| 29 | 7  | 0 | -0.673274 | -0.081280 | -2.302796 |
| 30 | 1  | 0 | -1.536193 | 0.362413  | -1.909800 |
| 31 | 6  | 0 | -1.722479 | -2.239233 | -1.626377 |
| 32 | 8  | 0 | -1.254391 | -2.070309 | -0.405709 |
| 33 | 8  | 0 | -2.708207 | -2.880511 | -1.921637 |
| 34 | 1  | 0 | -0.371103 | 5.284390  | -1.634681 |
| 35 | 1  | 0 | -0.377373 | 0.455409  | -3.116032 |
| 36 | 1  | 0 | 4.636090  | 0.648240  | 1.706893  |
| 37 | 1  | 0 | -0.248323 | 1.528358  | 0.382771  |
| 38 | 16 | 0 | -4.570503 | 0.613219  | 3.105213  |
| 39 | 6  | 0 | -4.934693 | 0.082262  | 1.375488  |
| 40 | 1  | 0 | -5.768565 | -0.617913 | 1.473769  |
| 41 | 1  | 0 | -5.282568 | 0.937394  | 0.793088  |
| 42 | 6  | 0 | -3.769524 | -0.591712 | 0.627378  |
| 43 | 1  | 0 | -4.163749 | -0.962222 | -0.321724 |
| 44 | 7  | 0 | -3.154018 | -1.735216 | 1.332630  |
| 45 | 6  | 0 | -2.664089 | 0.441950  | 0.294817  |
| 46 | 8  | 0 | -1.810095 | 0.657814  | 1.184631  |
| 47 | 8  | 0 | -2.716719 | 0.974019  | -0.850904 |
| 48 | 1  | 0 | -3.858768 | -2.421337 | 1.589824  |
| 49 | 1  | 0 | -3.398491 | 1.222189  | 2.822193  |
| 50 | 1  | 0 | -2.726391 | -1.390470 | 2.190571  |
| 51 | 1  | 0 | -2.000046 | -2.174933 | 0.313402  |

HF=-2143.888605\ZeroPoint=0.3677448\Thermal=0.3978432

G = -7.8 kcal mol<sup>-1</sup>

| Center Number | Atomic Number | Atomic Type | Coordinates (Angstroms) |           |           |
|---------------|---------------|-------------|-------------------------|-----------|-----------|
|               |               |             | X                       | Y         | Z         |
| 1             | 46            | 0           | -0.489601               | -0.138135 | 1.310823  |
| 2             | 7             | 0           | -2.060045               | -0.755032 | 0.084552  |
| 3             | 7             | 0           | -2.033801               | -1.936408 | -0.369123 |
| 4             | 6             | 0           | -0.988680               | -2.685753 | 0.161521  |
| 5             | 6             | 0           | -0.069698               | -2.068985 | 1.055664  |
| 6             | 6             | 0           | 0.975183                | -2.858543 | 1.536368  |
| 7             | 1             | 0           | 1.705581                | -2.433689 | 2.215484  |
| 8             | 6             | 0           | 1.105082                | -4.193228 | 1.142598  |
| 9             | 6             | 0           | 0.196253                | -4.779978 | 0.253705  |
| 10            | 1             | 0           | 0.314192                | -5.815302 | -0.043391 |
| 11            | 6             | 0           | -0.861042               | -4.025889 | -0.239986 |
| 12            | 1             | 0           | -1.589526               | -4.444182 | -0.925426 |
| 13            | 6             | 0           | -3.031744               | 0.112261  | -0.488941 |
| 14            | 6             | 0           | -3.762116               | 0.949839  | 0.357396  |
| 15            | 6             | 0           | -4.695839               | 1.828732  | -0.184127 |
| 16            | 1             | 0           | -5.281181               | 2.464023  | 0.470762  |
| 17            | 6             | 0           | -4.880514               | 1.886906  | -1.566326 |

|    |    |   |           |           |           |
|----|----|---|-----------|-----------|-----------|
| 18 | 1  | 0 | -5.599697 | 2.579591  | -1.987956 |
| 19 | 6  | 0 | -4.135315 | 1.056437  | -2.404682 |
| 20 | 1  | 0 | -4.269913 | 1.110437  | -3.478998 |
| 21 | 6  | 0 | -3.209576 | 0.163677  | -1.873387 |
| 22 | 1  | 0 | -2.596452 | -0.467715 | -2.502476 |
| 23 | 16 | 0 | 1.460398  | 0.376796  | 2.436486  |
| 24 | 6  | 0 | 1.201929  | 2.196532  | 2.667424  |
| 25 | 1  | 0 | 0.722604  | 2.384371  | 3.632675  |
| 26 | 1  | 0 | 2.177385  | 2.682990  | 2.662910  |
| 27 | 6  | 0 | 0.342463  | 2.785336  | 1.550581  |
| 28 | 1  | 0 | 0.145191  | 3.845842  | 1.762071  |
| 29 | 7  | 0 | -0.931082 | 2.020988  | 1.465154  |
| 30 | 1  | 0 | -1.471667 | 2.314020  | 0.654693  |
| 31 | 6  | 0 | 1.089059  | 2.746453  | 0.212579  |
| 32 | 8  | 0 | 2.231498  | 3.144549  | 0.116912  |
| 33 | 8  | 0 | 0.359431  | 2.264645  | -0.777004 |
| 34 | 1  | 0 | 1.929833  | -4.783214 | 1.528483  |
| 35 | 1  | 0 | -1.491628 | 2.206174  | 2.293762  |
| 36 | 1  | 0 | -3.612815 | 0.878382  | 1.428758  |
| 37 | 1  | 0 | 0.741613  | -2.754457 | -1.696869 |
| 38 | 16 | 0 | 4.617692  | 1.088229  | -1.202404 |
| 39 | 6  | 0 | 3.145047  | -0.010595 | -1.097961 |
| 40 | 1  | 0 | 3.515038  | -1.013722 | -0.894534 |
| 41 | 1  | 0 | 2.539339  | 0.292951  | -0.243111 |
| 42 | 6  | 0 | 2.319330  | -0.042115 | -2.397098 |
| 43 | 1  | 0 | 2.953291  | -0.466781 | -3.188036 |
| 44 | 7  | 0 | 1.830760  | 1.297702  | -2.762112 |
| 45 | 6  | 0 | 1.127599  | -0.983657 | -2.264214 |
| 46 | 8  | 0 | 1.523879  | -2.203196 | -1.870792 |
| 47 | 8  | 0 | -0.015913 | -0.684785 | -2.508938 |
| 48 | 1  | 0 | 2.629071  | 1.888767  | -2.982401 |
| 49 | 1  | 0 | 3.998464  | 2.189281  | -0.725099 |
| 50 | 1  | 0 | 0.942610  | 1.990148  | -1.578668 |
| 51 | 1  | 0 | 1.234361  | 1.240857  | -3.583197 |

HF=-2143.9259807\ZeroPoint=0.3692752\Thermal=0.3993144

G = 18.9 kcal mol<sup>-1</sup>

| Center Number | Atomic Number | Atomic Type | Coordinates (Angstroms) |           |           |
|---------------|---------------|-------------|-------------------------|-----------|-----------|
|               |               |             | X                       | Y         | Z         |
| 1             | 46            | 0           | -0.655278               | -0.469634 | 0.935626  |
| 2             | 7             | 0           | -2.055951               | 0.726490  | -0.097430 |
| 3             | 7             | 0           | -2.941740               | 0.171807  | -0.801991 |
| 4             | 6             | 0           | -2.920678               | -1.224916 | -0.709906 |
| 5             | 6             | 0           | -1.751442               | -1.897661 | -0.260627 |
| 6             | 6             | 0           | -1.822742               | -3.284339 | -0.078688 |
| 7             | 1             | 0           | -0.935953               | -3.816965 | 0.243844  |
| 8             | 6             | 0           | -3.000700               | -3.978193 | -0.352356 |
| 9             | 6             | 0           | -4.122521               | -3.299958 | -0.835744 |
| 10            | 1             | 0           | -5.028706               | -3.849134 | -1.063938 |
| 11            | 6             | 0           | -4.086265               | -1.919799 | -1.026794 |
| 12            | 1             | 0           | -4.950342               | -1.374415 | -1.386529 |
| 13            | 6             | 0           | -1.997362               | 2.150290  | -0.192239 |
| 14            | 6             | 0           | -2.031268               | 2.900006  | 0.984053  |
| 15            | 6             | 0           | -1.960069               | 4.288264  | 0.912864  |
| 16            | 1             | 0           | -2.007294               | 4.877582  | 1.821170  |

|    |    |   |           |           |           |
|----|----|---|-----------|-----------|-----------|
| 17 | 6  | 0 | -1.832398 | 4.916428  | -0.326124 |
| 18 | 1  | 0 | -1.762903 | 5.996686  | -0.379926 |
| 19 | 6  | 0 | -1.791705 | 4.154644  | -1.494572 |
| 20 | 1  | 0 | -1.685050 | 4.643204  | -2.456316 |
| 21 | 6  | 0 | -1.878721 | 2.767109  | -1.437881 |
| 22 | 1  | 0 | -1.806612 | 2.148508  | -2.321296 |
| 23 | 16 | 0 | 0.896255  | -1.920028 | 1.805232  |
| 24 | 6  | 0 | 1.712417  | -0.803514 | 3.036463  |
| 25 | 1  | 0 | 1.218506  | -0.908116 | 4.006270  |
| 26 | 1  | 0 | 2.753252  | -1.114318 | 3.128116  |
| 27 | 6  | 0 | 1.662837  | 0.634959  | 2.559430  |
| 28 | 1  | 0 | 1.987553  | 1.308779  | 3.364077  |
| 29 | 7  | 0 | 0.257768  | 0.984086  | 2.171064  |
| 30 | 1  | 0 | 0.305972  | 1.836568  | 1.609564  |
| 31 | 6  | 0 | 2.596435  | 0.918112  | 1.351575  |
| 32 | 8  | 0 | 3.728522  | 0.431824  | 1.376651  |
| 33 | 8  | 0 | 2.078388  | 1.658831  | 0.449638  |
| 34 | 1  | 0 | -3.040506 | -5.052006 | -0.209616 |
| 35 | 1  | 0 | -0.309285 | 1.155663  | 2.997776  |
| 36 | 1  | 0 | -2.157300 | 2.396980  | 1.935511  |
| 37 | 1  | 0 | -0.696815 | -1.570651 | -0.828608 |
| 38 | 16 | 0 | 4.949750  | -0.773460 | -1.470136 |
| 39 | 6  | 0 | 3.146422  | -1.172598 | -1.473513 |
| 40 | 1  | 0 | 3.020734  | -2.183406 | -1.855086 |
| 41 | 1  | 0 | 2.796085  | -1.172421 | -0.442635 |
| 42 | 6  | 0 | 2.313637  | -0.231935 | -2.340743 |
| 43 | 1  | 0 | 2.553250  | -0.386955 | -3.397125 |
| 44 | 7  | 0 | 2.600522  | 1.206665  | -2.032651 |
| 45 | 6  | 0 | 0.780192  | -0.422899 | -2.162011 |
| 46 | 8  | 0 | 0.426598  | -1.585512 | -1.807706 |
| 47 | 8  | 0 | 0.067848  | 0.573653  | -2.353038 |
| 48 | 1  | 0 | 3.553525  | 1.450290  | -2.303612 |
| 49 | 1  | 0 | 4.896915  | -0.092185 | -0.297969 |
| 50 | 1  | 0 | 2.468946  | 1.416395  | -0.959339 |
| 51 | 1  | 0 | 1.901306  | 1.771208  | -2.521105 |

HF=-2143.881752\ZeroPoint=0.3657141\Thermal=0.3948113

G = 18.6 kcal mol<sup>-1</sup>

| Center Number | Atomic Number | Atomic Type | Coordinates (Angstroms) |           |           |
|---------------|---------------|-------------|-------------------------|-----------|-----------|
|               |               |             | X                       | Y         | Z         |
| 1             | 46            | 0           | -0.680630               | -0.515261 | 0.857325  |
| 2             | 7             | 0           | -1.998157               | 0.872667  | -0.067692 |
| 3             | 7             | 0           | -2.956952               | 0.445668  | -0.760691 |
| 4             | 6             | 0           | -3.080288               | -0.953116 | -0.738367 |
| 5             | 6             | 0           | -1.961324               | -1.783407 | -0.482158 |
| 6             | 6             | 0           | -2.157501               | -3.160919 | -0.352928 |
| 7             | 1             | 0           | -1.299330               | -3.798989 | -0.181774 |
| 8             | 6             | 0           | -3.434888               | -3.702435 | -0.484319 |
| 9             | 6             | 0           | -4.521280               | -2.874936 | -0.779041 |
| 10            | 1             | 0           | -5.508799               | -3.304856 | -0.900546 |
| 11            | 6             | 0           | -4.349398               | -1.498528 | -0.919248 |
| 12            | 1             | 0           | -5.184116               | -0.842478 | -1.133570 |
| 13            | 6             | 0           | -1.807505               | 2.289127  | -0.089819 |
| 14            | 6             | 0           | -1.739451               | 2.970403  | 1.125615  |
| 15            | 6             | 0           | -1.543812               | 4.348456  | 1.126916  |

|    |    |   |           |           |           |    |    |   |           |           |           |
|----|----|---|-----------|-----------|-----------|----|----|---|-----------|-----------|-----------|
| 16 | 1  | 0 | -1.510757 | 4.887284  | 2.066556  | 15 | 6  | 0 | 4.498128  | 0.114130  | 2.876887  |
| 17 | 6  | 0 | -1.394723 | 5.030958  | -0.080336 | 16 | 1  | 0 | 5.548756  | 0.341643  | 3.016223  |
| 18 | 1  | 0 | -1.227547 | 6.101810  | -0.078523 | 17 | 6  | 0 | 3.874711  | -0.838116 | 3.685458  |
| 19 | 6  | 0 | -1.457904 | 4.335953  | -1.288806 | 18 | 1  | 0 | 4.440955  | -1.347796 | 4.456580  |
| 20 | 1  | 0 | -1.333671 | 4.866065  | -2.226046 | 19 | 6  | 0 | 2.524237  | -1.134174 | 3.499222  |
| 21 | 6  | 0 | -1.669814 | 2.961064  | -1.304256 | 20 | 1  | 0 | 2.030524  | -1.861652 | 4.132989  |
| 22 | 1  | 0 | -1.673468 | 2.388628  | -2.220850 | 21 | 6  | 0 | 1.794566  | -0.496169 | 2.499362  |
| 23 | 16 | 0 | 0.745870  | -2.146544 | 1.597079  | 22 | 1  | 0 | 0.738940  | -0.707905 | 2.367751  |
| 24 | 6  | 0 | 1.595095  | -1.230640 | 2.962328  | 23 | 16 | 0 | -0.987493 | -0.714044 | -2.352441 |
| 25 | 1  | 0 | 1.057357  | -1.393015 | 3.899952  | 24 | 6  | 0 | -1.031311 | -2.486477 | -1.800000 |
| 26 | 1  | 0 | 2.604879  | -1.632293 | 3.050616  | 25 | 1  | 0 | -1.823840 | -2.627888 | -1.063983 |
| 27 | 6  | 0 | 1.673507  | 0.244003  | 2.627909  | 26 | 1  | 0 | -1.244918 | -3.104115 | -2.671379 |
| 28 | 1  | 0 | 1.992582  | 0.816730  | 3.509134  | 27 | 6  | 0 | 0.301734  | -2.900442 | -1.177112 |
| 29 | 7  | 0 | 0.321486  | 0.739176  | 2.201473  | 28 | 1  | 0 | 0.191225  | -3.920990 | -0.781557 |
| 30 | 1  | 0 | 0.488806  | 1.608768  | 1.686185  | 29 | 7  | 0 | 0.674435  | -1.962226 | -0.096287 |
| 31 | 6  | 0 | 2.689348  | 0.581228  | 1.499204  | 30 | 1  | 0 | 1.634905  | -2.132008 | 0.193837  |
| 32 | 8  | 0 | 3.771114  | -0.007721 | 1.511982  | 31 | 6  | 0 | 1.455982  | -2.968654 | -2.169966 |
| 33 | 8  | 0 | 2.278621  | 1.468757  | 0.680990  | 32 | 8  | 0 | 1.111146  | -3.621869 | -3.297045 |
| 34 | 1  | 0 | -3.582473 | -4.771212 | -0.383150 | 33 | 8  | 0 | 2.564374  | -2.545821 | -1.958295 |
| 35 | 1  | 0 | -0.268386 | 0.923294  | 3.009036  | 34 | 1  | 0 | -1.033913 | 4.471935  | -3.279328 |
| 36 | 1  | 0 | -1.887230 | 2.430062  | 2.052999  | 35 | 1  | 0 | 0.061844  | -2.097269 | 0.717572  |
| 37 | 1  | 0 | -0.941111 | -1.470010 | -0.908045 | 36 | 1  | 0 | 4.245212  | 1.509167  | 1.245283  |
| 38 | 16 | 0 | 4.928865  | -0.909334 | -1.481634 | 37 | 1  | 0 | 1.890683  | -3.644640 | -3.872033 |
| 39 | 6  | 0 | 3.105646  | -1.202921 | -1.555454 | 38 | 1  | 0 | -2.590482 | 0.057004  | -1.059270 |
| 40 | 1  | 0 | 2.930811  | -2.164278 | -2.032985 | 39 | 16 | 0 | -5.019006 | 0.408799  | 2.365223  |
| 41 | 1  | 0 | 2.733298  | -1.278845 | -0.535003 | 40 | 6  | 0 | -3.248676 | 0.887014  | 2.163647  |
| 42 | 6  | 0 | 2.347326  | -0.141557 | -2.344013 | 41 | 1  | 0 | -3.268404 | 1.967276  | 1.996787  |
| 43 | 1  | 0 | 2.619130  | -0.197121 | -3.402314 | 42 | 1  | 0 | -2.700468 | 0.699982  | 3.087322  |
| 44 | 7  | 0 | 2.680782  | 1.246833  | -1.883365 | 43 | 6  | 0 | -2.510026 | 0.173904  | 1.034823  |
| 45 | 6  | 0 | 0.796047  | -0.284290 | -2.241421 | 44 | 1  | 0 | -1.539846 | 0.646034  | 0.868545  |
| 46 | 8  | 0 | 0.368119  | -1.452409 | -2.114474 | 45 | 7  | 0 | -3.264331 | 0.216051  | -0.261812 |
| 47 | 8  | 0 | 0.153191  | 0.788901  | -2.277587 | 46 | 1  | 0 | -3.870400 | -0.625214 | -0.218580 |
| 48 | 1  | 0 | 3.616678  | 1.523545  | -2.176777 | 47 | 6  | 0 | -2.293426 | -1.347902 | 1.333515  |
| 49 | 1  | 0 | 4.896497  | -0.366499 | -0.238664 | 48 | 8  | 0 | -1.289727 | -1.623366 | 2.018892  |
| 50 | 1  | 0 | 2.612934  | 1.334506  | -0.805064 | 49 | 8  | 0 | -3.157271 | -2.099375 | 0.826686  |
| 51 | 1  | 0 | 1.944177  | 1.853679  | -2.261444 | 50 | 1  | 0 | -3.812880 | 1.063085  | -0.402155 |
|    |    |   |           |           |           | 51 | 1  | 0 | -4.810453 | -0.925702 | 2.384550  |

HF=-2143.8826956\ZeroPoint=0.3679127\Thermal=0.3977636

HF=-2143.9168844\ZeroPoint=0.3699717\Thermal=0.4001879

G = -2.7 kcal mol<sup>-1</sup>

G = 25.0 kcal mol<sup>-1</sup>

| Center Number | Atomic Number | Atomic Type | Coordinates (Angstroms) |          |           |
|---------------|---------------|-------------|-------------------------|----------|-----------|
|               |               |             | X                       | Y        | Z         |
| 1             | 46            | 0           | 0.429200                | 0.128699 | -0.714054 |
| 2             | 7             | 0           | 1.666967                | 1.093774 | 0.674548  |
| 3             | 7             | 0           | 1.840683                | 2.339410 | 0.541024  |
| 4             | 6             | 0           | 1.078100                | 2.888369 | -0.485362 |
| 5             | 6             | 0           | 0.244965                | 2.040653 | -1.266077 |
| 6             | 6             | 0           | -0.505087               | 2.645631 | -2.273878 |
| 7             | 1             | 0           | -1.139359               | 2.044591 | -2.916697 |
| 8             | 6             | 0           | -0.439565               | 4.027886 | -2.487225 |
| 9             | 6             | 0           | 0.384096                | 4.842622 | -1.705361 |
| 10            | 1             | 0           | 0.427081                | 5.909979 | -1.886624 |
| 11            | 6             | 0           | 1.152034                | 4.271548 | -0.698934 |
| 12            | 1             | 0           | 1.808121                | 4.868242 | -0.075861 |
| 13            | 6             | 0           | 2.428693                | 0.458028 | 1.699051  |
| 14            | 6             | 0           | 3.778357                | 0.771218 | 1.884916  |

| Center Number | Atomic Number | Atomic Type | Coordinates (Angstroms) |           |           |
|---------------|---------------|-------------|-------------------------|-----------|-----------|
|               |               |             | X                       | Y         | Z         |
| 1             | 46            | 0           | 0.357157                | 0.382893  | 0.574147  |
| 2             | 7             | 0           | 0.883483                | -1.656884 | 0.282875  |
| 3             | 7             | 0           | 0.657414                | -2.441587 | 1.250460  |
| 4             | 6             | 0           | -0.066171               | -1.865622 | 2.298440  |
| 5             | 6             | 0           | -0.688997               | -0.593521 | 2.157016  |
| 6             | 6             | 0           | -1.304517               | -0.038317 | 3.286987  |
| 7             | 1             | 0           | -1.786358               | 0.929053  | 3.196655  |
| 8             | 6             | 0           | -1.327591               | -0.724286 | 4.499557  |
| 9             | 6             | 0           | -0.744488               | -1.990643 | 4.604091  |
| 10            | 1             | 0           | -0.776192               | -2.524241 | 5.546892  |
| 11            | 6             | 0           | -0.113837               | -2.567340 | 3.505466  |
| 12            | 1             | 0           | 0.367825                | -3.535345 | 3.573450  |
| 13            | 6             | 0           | 1.687048                | -2.190050 | -0.765165 |

|    |    |   |           |           |           |    |    |   |           |           |           |
|----|----|---|-----------|-----------|-----------|----|----|---|-----------|-----------|-----------|
| 14 | 6  | 0 | 2.736303  | -3.074840 | -0.482516 | 13 | 6  | 0 | -0.369956 | 2.929890  | 0.226090  |
| 15 | 6  | 0 | 3.516304  | -3.556421 | -1.525372 | 14 | 6  | 0 | -1.037834 | 4.112339  | 0.578625  |
| 16 | 1  | 0 | 4.340986  | -4.226874 | -1.313027 | 15 | 6  | 0 | -0.738436 | 5.283430  | -0.101299 |
| 17 | 6  | 0 | 3.245712  | -3.173060 | -2.841757 | 16 | 1  | 0 | -1.258307 | 6.199740  | 0.153016  |
| 18 | 1  | 0 | 3.858174  | -3.552765 | -3.651601 | 17 | 6  | 0 | 0.224445  | 5.282877  | -1.116665 |
| 19 | 6  | 0 | 2.193010  | -2.299680 | -3.112245 | 18 | 1  | 0 | 0.452319  | 6.202745  | -1.643175 |
| 20 | 1  | 0 | 1.971400  | -2.008952 | -4.132476 | 19 | 6  | 0 | 0.884581  | 4.103489  | -1.454810 |
| 21 | 6  | 0 | 1.412687  | -1.791085 | -2.076836 | 20 | 1  | 0 | 1.636756  | 4.099388  | -2.234773 |
| 22 | 1  | 0 | 0.577978  | -1.127373 | -2.289328 | 21 | 6  | 0 | 0.585440  | 2.914265  | -0.793887 |
| 23 | 16 | 0 | -0.121740 | 2.515533  | 1.262958  | 22 | 1  | 0 | 1.120738  | 2.001073  | -1.044595 |
| 24 | 6  | 0 | 0.208203  | 3.352819  | -0.343833 | 23 | 16 | 0 | -1.375493 | -2.509894 | -0.288595 |
| 25 | 1  | 0 | -0.640225 | 3.174838  | -1.007558 | 24 | 6  | 0 | -0.657718 | -2.581663 | -1.980250 |
| 26 | 1  | 0 | 0.322280  | 4.420819  | -0.157769 | 25 | 1  | 0 | 0.427172  | -2.652456 | -1.890198 |
| 27 | 6  | 0 | 1.471929  | 2.769253  | -0.965859 | 26 | 1  | 0 | -1.060201 | -3.457940 | -2.489270 |
| 28 | 1  | 0 | 1.622562  | 3.208747  | -1.962461 | 27 | 6  | 0 | -1.011959 | -1.297360 | -2.716708 |
| 29 | 7  | 0 | 1.314732  | 1.301228  | -1.087919 | 28 | 1  | 0 | -0.508805 | -1.280853 | -3.694475 |
| 30 | 1  | 0 | 2.213366  | 0.865547  | -1.285932 | 29 | 7  | 0 | -0.546238 | -0.145134 | -1.911835 |
| 31 | 6  | 0 | 2.746240  | 3.054302  | -0.182371 | 30 | 1  | 0 | -1.012462 | 0.705523  | -2.224407 |
| 32 | 8  | 0 | 2.845880  | 4.353679  | 0.155610  | 31 | 6  | 0 | -2.497963 | -1.125616 | -3.003101 |
| 33 | 8  | 0 | 3.599223  | 2.235482  | 0.054738  | 32 | 8  | 0 | -3.035558 | -2.236054 | -3.541679 |
| 34 | 1  | 0 | -1.808323 | -0.278827 | 5.362992  | 33 | 8  | 0 | -3.112461 | -0.101871 | -2.832402 |
| 35 | 1  | 0 | 0.643708  | 1.079188  | -1.851305 | 34 | 1  | 0 | -2.194799 | -3.111880 | 3.833520  |
| 36 | 1  | 0 | 2.935219  | -3.355091 | 0.543480  | 35 | 1  | 0 | 0.500030  | -0.022803 | -1.998020 |
| 37 | 1  | 0 | 3.680346  | 4.469444  | 0.634160  | 36 | 1  | 0 | -1.783539 | 4.092811  | 1.362112  |
| 38 | 1  | 0 | -1.415043 | -0.392852 | 1.122400  | 37 | 1  | 0 | -3.971152 | -2.054776 | -3.716574 |
| 39 | 16 | 0 | -5.109097 | -0.082285 | -1.970605 | 38 | 1  | 0 | 0.627443  | -0.331415 | 2.184452  |
| 40 | 6  | 0 | -3.621018 | -1.168955 | -2.052379 | 39 | 16 | 0 | 5.468838  | -1.603779 | 0.129134  |
| 41 | 1  | 0 | -3.967703 | -2.141054 | -1.690158 | 40 | 6  | 0 | 4.706311  | 0.076553  | 0.138125  |
| 42 | 1  | 0 | -3.306536 | -1.292046 | -3.090408 | 41 | 1  | 0 | 5.259453  | 0.623342  | 0.907088  |
| 43 | 6  | 0 | -2.411790 | -0.697345 | -1.224869 | 42 | 1  | 0 | 4.885661  | 0.567986  | -0.820226 |
| 44 | 1  | 0 | -1.673658 | -1.503588 | -1.246725 | 43 | 6  | 0 | 3.193549  | 0.115805  | 0.452781  |
| 45 | 7  | 0 | -2.727289 | -0.390133 | 0.184758  | 44 | 1  | 0 | 2.924897  | 1.175136  | 0.521502  |
| 46 | 1  | 0 | -3.068930 | 0.573170  | 0.211203  | 45 | 7  | 0 | 2.786378  | -0.557029 | 1.690962  |
| 47 | 6  | 0 | -1.764177 | 0.566433  | -1.870154 | 46 | 1  | 0 | 2.776296  | -1.557192 | 1.498602  |
| 48 | 8  | 0 | -0.783354 | 0.354727  | -2.637529 | 47 | 6  | 0 | 2.406766  | -0.481521 | -0.739053 |
| 49 | 8  | 0 | -2.271065 | 1.659722  | -1.557169 | 48 | 8  | 0 | 2.079222  | 0.336556  | -1.656402 |
| 50 | 1  | 0 | -3.461831 | -0.993576 | 0.547472  | 49 | 8  | 0 | 2.152489  | -1.699419 | -0.709107 |
| 51 | 1  | 0 | -4.437815 | 1.079602  | -2.133989 | 50 | 1  | 0 | 3.478705  | -0.404845 | 2.419625  |
|    |    |   |           |           |           | 51 | 1  | 0 | 4.501583  | -2.197293 | -0.603346 |

HF=-2143.870873\ZeroPoint=0.3656013\Thermal=0.3952249

G = 21.7 kcal mol<sup>-1</sup>

| Center Number | Atomic Number | Atomic Type | Coordinates (Angstroms) |           |          |
|---------------|---------------|-------------|-------------------------|-----------|----------|
|               |               |             | X                       | Y         | Z        |
| 1             | 46            | 0           | -0.794455               | -0.338918 | 0.162524 |
| 2             | 7             | 0           | -0.646393               | 1.697624  | 0.877388 |
| 3             | 7             | 0           | -1.167663               | 1.754898  | 2.021616 |
| 4             | 6             | 0           | -1.408897               | 0.446100  | 2.528356 |
| 5             | 6             | 0           | -0.416910               | -0.566322 | 2.423127 |
| 6             | 6             | 0           | -0.725686               | -1.852298 | 2.910359 |
| 7             | 1             | 0           | 0.024308                | -2.628754 | 2.828431 |
| 8             | 6             | 0           | -1.961703               | -2.115725 | 3.477653 |
| 9             | 6             | 0           | -2.905949               | -1.087738 | 3.612560 |
| 10            | 1             | 0           | -3.864871               | -1.297063 | 4.072536 |
| 11            | 6             | 0           | -2.634771               | 0.193623  | 3.155382 |
| 12            | 1             | 0           | -3.361807               | 0.991572  | 3.239539 |

HF=-2143.8750606\ZeroPoint=0.3679486\Thermal=0.3986843

G = 11.0 kcal mol<sup>-1</sup>

| Center Number | Atomic Number | Atomic Type | Coordinates (Angstroms) |           |           |
|---------------|---------------|-------------|-------------------------|-----------|-----------|
|               |               |             | X                       | Y         | Z         |
| 1             | 7             | 0           | 2.735942                | 0.388686  | 1.401214  |
| 2             | 7             | 0           | 2.256614                | -0.189618 | 0.373784  |
| 3             | 6             | 0           | 3.208572                | -0.454144 | -0.658041 |
| 4             | 6             | 0           | 4.513229                | -0.844157 | -0.330944 |
| 5             | 6             | 0           | 5.429125                | -1.089133 | -1.346253 |
| 6             | 1             | 0           | 6.434813                | -1.405775 | -1.094800 |
| 7             | 6             | 0           | 5.055883                | -0.939099 | -2.683650 |
| 8             | 6             | 0           | 3.756278                | -0.549282 | -3.001867 |
| 9             | 1             | 0           | 3.457413                | -0.438114 | -4.037480 |
| 10            | 6             | 0           | 2.827002                | -0.311979 | -1.993449 |
| 11            | 1             | 0           | 1.810925                | -0.031732 | -2.235454 |

|    |    |   |           |           |           |    |    |   |           |           |           |
|----|----|---|-----------|-----------|-----------|----|----|---|-----------|-----------|-----------|
| 12 | 6  | 0 | 1.812352  | 0.597677  | 2.412481  | 11 | 1  | 0 | -1.225697 | -1.647263 | 1.393632  |
| 13 | 6  | 0 | 2.218151  | 1.319643  | 3.547450  | 12 | 6  | 0 | -1.781508 | 1.879573  | -1.628064 |
| 14 | 6  | 0 | 1.287668  | 1.584737  | 4.541588  | 13 | 6  | 0 | -2.318955 | 2.819307  | -2.514544 |
| 15 | 1  | 0 | 1.575773  | 2.139629  | 5.426410  | 14 | 6  | 0 | -1.469713 | 3.729518  | -3.132738 |
| 16 | 6  | 0 | -0.030445 | 1.136076  | 4.390577  | 15 | 1  | 0 | -1.871159 | 4.450561  | -3.835101 |
| 17 | 1  | 0 | -0.760257 | 1.354559  | 5.163361  | 16 | 6  | 0 | -0.098505 | 3.719857  | -2.849453 |
| 18 | 6  | 0 | -0.423231 | 0.411703  | 3.260243  | 17 | 1  | 0 | 0.554523  | 4.439766  | -3.330197 |
| 19 | 1  | 0 | -1.460655 | 0.101480  | 3.181704  | 18 | 6  | 0 | 0.424754  | 2.806796  | -1.936551 |
| 20 | 6  | 0 | 0.488660  | 0.109059  | 2.246383  | 19 | 1  | 0 | 1.481173  | 2.847351  | -1.687438 |
| 21 | 1  | 0 | 5.773000  | -1.135334 | -3.472364 | 20 | 6  | 0 | -0.395398 | 1.865905  | -1.296269 |
| 22 | 1  | 0 | 3.244882  | 1.658996  | 3.623640  | 21 | 1  | 0 | -5.010726 | -3.552058 | 2.077618  |
| 23 | 46 | 0 | 0.274221  | -0.830506 | 0.471722  | 22 | 1  | 0 | -3.381211 | 2.802729  | -2.727666 |
| 24 | 16 | 0 | -0.070058 | -1.800984 | -1.680117 | 23 | 46 | 0 | -0.022039 | -0.230632 | -0.897223 |
| 25 | 6  | 0 | -1.888132 | -2.086017 | -1.512284 | 24 | 16 | 0 | 0.134142  | -2.537713 | -1.042074 |
| 26 | 1  | 0 | -2.176767 | -2.901678 | -2.173671 | 25 | 6  | 0 | 1.910003  | -2.630788 | -0.561829 |
| 27 | 1  | 0 | -2.445303 | -1.192756 | -1.805103 | 26 | 1  | 0 | 2.281498  | -3.628685 | -0.792186 |
| 28 | 6  | 0 | -2.208263 | -2.459431 | -0.067752 | 27 | 1  | 0 | 2.000180  | -2.438364 | 0.510655  |
| 29 | 1  | 0 | -1.681448 | -3.389849 | 0.169367  | 28 | 6  | 0 | 2.660627  | -1.574937 | -1.363052 |
| 30 | 7  | 0 | -1.697242 | -1.405000 | 0.843372  | 29 | 1  | 0 | 2.517686  | -1.786637 | -2.428756 |
| 31 | 6  | 0 | -3.686729 | -2.703272 | 0.217505  | 30 | 7  | 0 | 2.062988  | -0.247984 | -1.070297 |
| 32 | 1  | 0 | -2.246081 | -0.537388 | 0.719579  | 31 | 6  | 0 | 4.168362  | -1.511786 | -1.139780 |
| 33 | 1  | 0 | -1.830257 | -1.693834 | 1.809064  | 32 | 1  | 0 | 2.335608  | 0.053380  | -0.104300 |
| 34 | 8  | 0 | -4.252533 | -3.499823 | -0.711339 | 33 | 1  | 0 | 2.429627  | 0.448422  | -1.713698 |
| 35 | 8  | 0 | -4.276357 | -2.273885 | 1.177130  | 34 | 8  | 0 | 4.716188  | -2.738033 | -1.021215 |
| 36 | 1  | 0 | -5.182053 | -3.624582 | -0.465671 | 35 | 8  | 0 | 4.808102  | -0.490751 | -1.124870 |
| 37 | 1  | 0 | 0.524314  | 2.112658  | 0.198909  | 36 | 1  | 0 | 5.672928  | -2.623821 | -0.912829 |
| 38 | 7  | 0 | -0.415477 | 2.457875  | 0.011744  | 37 | 1  | 0 | -0.120509 | 1.792432  | 0.003210  |
| 39 | 6  | 0 | -0.982913 | 2.047660  | -1.320403 | 38 | 7  | 0 | 0.105419  | 2.227313  | 1.378066  |
| 40 | 1  | 0 | -0.481417 | 3.473460  | 0.134100  | 39 | 6  | 0 | 0.007527  | 1.114418  | 2.344475  |
| 41 | 6  | 0 | -1.021137 | 3.174209  | -2.340509 | 40 | 1  | 0 | -0.502342 | 3.005998  | 1.624421  |
| 42 | 1  | 0 | -0.384967 | 1.212765  | -1.694829 | 41 | 6  | 0 | 0.087890  | 1.555539  | 3.814073  |
| 43 | 6  | 0 | -2.393777 | 1.441333  | -0.983373 | 42 | 1  | 0 | -0.956085 | 0.620684  | 2.198583  |
| 44 | 16 | 0 | -1.807403 | 4.717657  | -1.706997 | 43 | 6  | 0 | 1.128174  | 0.079557  | 2.026128  |
| 45 | 1  | 0 | -0.019584 | 3.470878  | -2.659258 | 44 | 16 | 0 | 1.556655  | 2.588004  | 4.239470  |
| 46 | 1  | 0 | -1.573493 | 2.813133  | -3.206391 | 45 | 1  | 0 | -0.772306 | 2.177284  | 4.077739  |
| 47 | 8  | 0 | -3.133958 | 1.204601  | -1.930762 | 46 | 1  | 0 | 0.066919  | 0.663106  | 4.440960  |
| 48 | 8  | 0 | -2.551409 | 1.229492  | 0.263210  | 47 | 8  | 0 | 0.886419  | -1.102384 | 2.300839  |
| 49 | 1  | 0 | -3.028893 | 4.178276  | -1.508031 | 48 | 8  | 0 | 2.179039  | 0.579494  | 1.516981  |
| 50 | 1  | 0 | -1.128921 | 1.974452  | 0.649118  | 49 | 1  | 0 | 2.473369  | 1.784269  | 3.657339  |
| 51 | 1  | 0 | 4.785623  | -0.962923 | 0.709472  | 50 | 1  | 0 | 1.072477  | 2.554959  | 1.384983  |
|    |    |   |           |           |           | 51 | 1  | 0 | -4.643320 | -0.578434 | -1.004981 |

HF=-2143.8962547\ZeroPoint=0.3732051\Thermal=0.4036364

HF=-2143.866579\ZeroPoint=0.3654842\Thermal=0.3953186

G = 27.0 kcal mol<sup>-1</sup>

G = 19.9 kcal mol<sup>-1</sup>

| Center Number | Atomic Number | Atomic Type | Coordinates (Angstroms) |           |           |
|---------------|---------------|-------------|-------------------------|-----------|-----------|
|               |               |             | X                       | Y         | Z         |
| 1             | 7             | 0           | -2.642224               | 0.948821  | -1.048706 |
| 2             | 7             | 0           | -2.050027               | -0.066146 | -0.569349 |
| 3             | 6             | 0           | -2.860449               | -1.011684 | 0.119802  |
| 4             | 6             | 0           | -4.216488               | -1.166945 | -0.204025 |
| 5             | 6             | 0           | -4.980729               | -2.086253 | 0.498618  |
| 6             | 1             | 0           | -6.024107               | -2.225368 | 0.240344  |
| 7             | 6             | 0           | -4.407270               | -2.836063 | 1.531270  |
| 8             | 6             | 0           | -3.062162               | -2.670370 | 1.850526  |
| 9             | 1             | 0           | -2.612230               | -3.247855 | 2.649059  |
| 10            | 6             | 0           | -2.272214               | -1.769759 | 1.139853  |

| Center Number | Atomic Number | Atomic Type | Coordinates (Angstroms) |           |           |
|---------------|---------------|-------------|-------------------------|-----------|-----------|
|               |               |             | X                       | Y         | Z         |
| 1             | 7             | 0           | 2.818675                | -0.655998 | 1.093174  |
| 2             | 7             | 0           | 2.190137                | -0.239954 | 0.082572  |
| 3             | 6             | 0           | 2.886244                | 0.628129  | -0.806520 |
| 4             | 6             | 0           | 4.284284                | 0.595600  | -0.902608 |
| 5             | 6             | 0           | 4.921215                | 1.470172  | -1.770152 |
| 6             | 1             | 0           | 6.000233                | 1.440468  | -1.866428 |
| 7             | 6             | 0           | 4.174189                | 2.383639  | -2.521841 |
| 8             | 6             | 0           | 2.786022                | 2.412870  | -2.411691 |
| 9             | 1             | 0           | 2.204356                | 3.120060  | -2.990534 |



|    |    |   |           |           |           |    |    |   |           |           |           |
|----|----|---|-----------|-----------|-----------|----|----|---|-----------|-----------|-----------|
| 10 | 6  | 0 | 2.126381  | 1.526048  | -1.564859 | 9  | 6  | 0 | 0.384096  | 4.842622  | -1.705361 |
| 11 | 1  | 0 | 1.045096  | 1.551694  | -1.479483 | 10 | 1  | 0 | 0.427081  | 5.909979  | -1.886624 |
| 12 | 6  | 0 | 2.012100  | -1.411614 | 1.969796  | 11 | 6  | 0 | 1.152034  | 4.271548  | -0.698934 |
| 13 | 6  | 0 | 2.561953  | -2.528619 | 2.600487  | 12 | 1  | 0 | 1.808121  | 4.868242  | -0.075861 |
| 14 | 6  | 0 | 1.751685  | -3.311095 | 3.417675  | 13 | 6  | 0 | 2.428693  | 0.458028  | 1.699051  |
| 15 | 1  | 0 | 2.164971  | -4.195201 | 3.889154  | 14 | 6  | 0 | 3.778357  | 0.771218  | 1.884916  |
| 16 | 6  | 0 | 0.412910  | -2.968922 | 3.636210  | 15 | 6  | 0 | 4.498128  | 0.114130  | 2.876887  |
| 17 | 1  | 0 | -0.202074 | -3.584141 | 4.282432  | 16 | 1  | 0 | 5.548756  | 0.341643  | 3.016223  |
| 18 | 6  | 0 | -0.117646 | -1.821974 | 3.051453  | 17 | 6  | 0 | 3.874711  | -0.838116 | 3.685458  |
| 19 | 1  | 0 | -1.137897 | -1.516341 | 3.253946  | 18 | 1  | 0 | 4.440955  | -1.347796 | 4.456580  |
| 20 | 6  | 0 | 0.672123  | -1.028843 | 2.214521  | 19 | 6  | 0 | 2.524237  | -1.134174 | 3.499222  |
| 21 | 1  | 0 | 4.678861  | 3.066045  | -3.196355 | 20 | 1  | 0 | 2.030524  | -1.861652 | 4.132989  |
| 22 | 1  | 0 | 3.596938  | -2.789209 | 2.416302  | 21 | 6  | 0 | 1.794566  | -0.496169 | 2.499362  |
| 23 | 46 | 0 | 0.255127  | -0.935176 | -0.191420 | 22 | 1  | 0 | 0.738940  | -0.707905 | 2.367751  |
| 24 | 16 | 0 | 0.294846  | -1.180453 | -2.474309 | 23 | 16 | 0 | -0.987493 | -0.714044 | -2.352441 |
| 25 | 6  | 0 | -1.515508 | -0.945452 | -2.714398 | 24 | 6  | 0 | -1.031311 | -2.486477 | -1.800000 |
| 26 | 1  | 0 | -1.763719 | -1.238328 | -3.734527 | 25 | 1  | 0 | -1.823840 | -2.627888 | -1.063983 |
| 27 | 1  | 0 | -1.758813 | 0.105874  | -2.547489 | 26 | 1  | 0 | -1.244918 | -3.104115 | -2.671379 |
| 28 | 6  | 0 | -2.227540 | -1.826798 | -1.697092 | 27 | 6  | 0 | 0.301734  | -2.900442 | -1.177112 |
| 29 | 1  | 0 | -1.946388 | -2.869202 | -1.886216 | 28 | 1  | 0 | 0.191225  | -3.920990 | -0.781557 |
| 30 | 7  | 0 | -1.754601 | -1.456922 | -0.340943 | 29 | 7  | 0 | 0.674435  | -1.962226 | -0.096287 |
| 31 | 6  | 0 | -3.751858 | -1.785444 | -1.735506 | 30 | 1  | 0 | 1.634905  | -2.132008 | 0.193837  |
| 32 | 1  | 0 | -2.163107 | -0.531122 | -0.020987 | 31 | 6  | 0 | 1.455982  | -2.968654 | -2.169966 |
| 33 | 1  | 0 | -2.050837 | -2.155101 | 0.336731  | 32 | 8  | 0 | 1.111146  | -3.621869 | -3.297045 |
| 34 | 8  | 0 | -4.224423 | -1.732850 | -2.998339 | 33 | 8  | 0 | 2.564374  | -2.545821 | -1.958295 |
| 35 | 8  | 0 | -4.456648 | -1.847085 | -0.761132 | 34 | 1  | 0 | -1.033913 | 4.471935  | -3.279328 |
| 36 | 1  | 0 | -5.192844 | -1.739264 | -2.950515 | 35 | 1  | 0 | 0.061844  | -2.097269 | 0.717572  |
| 37 | 1  | 0 | 0.335178  | -0.008150 | 1.964307  | 36 | 1  | 0 | 4.245212  | 1.509167  | 1.245283  |
| 38 | 7  | 0 | -0.266788 | 2.074456  | 2.305808  | 37 | 1  | 0 | 1.890683  | -3.644640 | -3.872033 |
| 39 | 6  | 0 | -0.634122 | 2.739223  | 1.051237  | 38 | 1  | 0 | -2.590482 | 0.057004  | -1.059270 |
| 40 | 1  | 0 | 0.198683  | 2.728967  | 2.929450  | 39 | 16 | 0 | -5.019006 | 0.408799  | 2.365223  |
| 41 | 6  | 0 | -1.440873 | 4.048855  | 1.198548  | 40 | 6  | 0 | -3.248676 | 0.887014  | 2.163647  |
| 42 | 1  | 0 | 0.285620  | 3.000021  | 0.518753  | 41 | 1  | 0 | -3.268404 | 1.967276  | 1.996787  |
| 43 | 6  | 0 | -1.409489 | 1.754522  | 0.144686  | 42 | 1  | 0 | -2.700468 | 0.699982  | 3.087322  |
| 44 | 16 | 0 | -2.981499 | 3.915015  | 2.206949  | 43 | 6  | 0 | -2.510026 | 0.173904  | 1.034823  |
| 45 | 1  | 0 | -0.840289 | 4.801111  | 1.717576  | 44 | 1  | 0 | -1.539846 | 0.646034  | 0.868545  |
| 46 | 1  | 0 | -1.684730 | 4.433638  | 0.206455  | 45 | 7  | 0 | -3.264331 | 0.216051  | -0.261812 |
| 47 | 8  | 0 | -1.216308 | 1.829004  | -1.083178 | 46 | 1  | 0 | -3.870400 | -0.625214 | -0.218580 |
| 48 | 8  | 0 | -2.183958 | 0.943667  | 0.746745  | 47 | 6  | 0 | -2.293426 | -1.347902 | 1.333515  |
| 49 | 1  | 0 | -3.450896 | 2.799550  | 1.606848  | 48 | 8  | 0 | -1.289727 | -1.623366 | 2.018892  |
| 50 | 1  | 0 | -1.125918 | 1.785465  | 2.768443  | 49 | 8  | 0 | -3.157271 | -2.099375 | 0.826686  |
| 51 | 1  | 0 | 4.844535  | -0.116461 | -0.311494 | 50 | 1  | 0 | -3.812880 | 1.063085  | -0.402155 |
|    |    |   |           |           |           | 51 | 1  | 0 | -4.810453 | -0.925702 | 2.384550  |

HF=-2143.8764616\ZeroPoint=0.3679541\Thermal=0.398797

HF=-2143.9168844\ZeroPoint=0.3699717\Thermal=0.4001879

G = -2.7 kcal mol<sup>-1</sup>

G = 25.0 kcal mol<sup>-1</sup>

| Center Number | Atomic Number | Atomic Type | Coordinates (Angstroms) |          |           |
|---------------|---------------|-------------|-------------------------|----------|-----------|
|               |               |             | X                       | Y        | Z         |
| 1             | 46            | 0           | 0.429200                | 0.128699 | -0.714054 |
| 2             | 7             | 0           | 1.666967                | 1.093774 | 0.674548  |
| 3             | 7             | 0           | 1.840683                | 2.339410 | 0.541024  |
| 4             | 6             | 0           | 1.078100                | 2.888369 | -0.485362 |
| 5             | 6             | 0           | 0.244965                | 2.040653 | -1.266077 |
| 6             | 6             | 0           | -0.505087               | 2.645631 | -2.273878 |
| 7             | 1             | 0           | -1.139359               | 2.044591 | -2.916697 |
| 8             | 6             | 0           | -0.439565               | 4.027886 | -2.487225 |

| Center Number | Atomic Number | Atomic Type | Coordinates (Angstroms) |           |          |
|---------------|---------------|-------------|-------------------------|-----------|----------|
|               |               |             | X                       | Y         | Z        |
| 1             | 46            | 0           | 0.357157                | 0.382893  | 0.574147 |
| 2             | 7             | 0           | 0.883483                | -1.656884 | 0.282875 |
| 3             | 7             | 0           | 0.657414                | -2.441587 | 1.250460 |
| 4             | 6             | 0           | -0.066171               | -1.865622 | 2.298440 |
| 5             | 6             | 0           | -0.688997               | -0.593521 | 2.157016 |
| 6             | 6             | 0           | -1.304517               | -0.038317 | 3.286987 |
| 7             | 1             | 0           | -1.786358               | 0.929053  | 3.196655 |

|    |    |   |           |           |           |    |    |   |           |           |           |
|----|----|---|-----------|-----------|-----------|----|----|---|-----------|-----------|-----------|
| 8  | 6  | 0 | -1.327591 | -0.724286 | 4.499557  | 7  | 1  | 0 | 0.024308  | -2.628754 | 2.828431  |
| 9  | 6  | 0 | -0.744488 | -1.990643 | 4.604091  | 8  | 6  | 0 | -1.961703 | -2.115725 | 3.477653  |
| 10 | 1  | 0 | -0.776192 | -2.524241 | 5.546892  | 9  | 6  | 0 | -2.905949 | -1.087738 | 3.612560  |
| 11 | 6  | 0 | -0.113837 | -2.567340 | 3.505466  | 10 | 1  | 0 | -3.864871 | -1.297063 | 4.072536  |
| 12 | 1  | 0 | 0.367825  | -3.535345 | 3.573450  | 11 | 6  | 0 | -2.634771 | 0.193623  | 3.155382  |
| 13 | 6  | 0 | 1.687048  | -2.190050 | -0.765165 | 12 | 1  | 0 | -3.361807 | 0.991572  | 3.239539  |
| 14 | 6  | 0 | 2.736303  | -3.074840 | -0.482516 | 13 | 6  | 0 | -0.369956 | 2.929890  | 0.226090  |
| 15 | 6  | 0 | 3.516304  | -3.556421 | -1.525372 | 14 | 6  | 0 | -1.037834 | 4.112339  | 0.578625  |
| 16 | 1  | 0 | 4.340986  | -4.226874 | -1.313027 | 15 | 6  | 0 | -0.738436 | 5.283430  | -0.101299 |
| 17 | 6  | 0 | 3.245712  | -3.173060 | -2.841757 | 16 | 1  | 0 | -1.258307 | 6.199740  | 0.153016  |
| 18 | 1  | 0 | 3.858174  | -3.552765 | -3.651601 | 17 | 6  | 0 | 0.224445  | 5.282877  | -1.116665 |
| 19 | 6  | 0 | 2.193010  | -2.299680 | -3.112245 | 18 | 1  | 0 | 0.452319  | 6.202745  | -1.643175 |
| 20 | 1  | 0 | 1.971400  | -2.008952 | -4.132476 | 19 | 6  | 0 | 0.884581  | 4.103489  | -1.454810 |
| 21 | 6  | 0 | 1.412687  | -1.791085 | -2.076836 | 20 | 1  | 0 | 1.636756  | 4.099388  | -2.234773 |
| 22 | 1  | 0 | 0.577978  | -1.127373 | -2.289328 | 21 | 6  | 0 | 0.585440  | 2.914265  | -0.793887 |
| 23 | 16 | 0 | -0.121740 | 2.515533  | 1.262958  | 22 | 1  | 0 | 1.120738  | 2.001073  | -1.044595 |
| 24 | 6  | 0 | 0.208203  | 3.352819  | -0.343833 | 23 | 16 | 0 | -1.375493 | -2.509894 | -0.288595 |
| 25 | 1  | 0 | -0.640225 | 3.174838  | -1.007558 | 24 | 6  | 0 | -0.657718 | -2.581663 | -1.980250 |
| 26 | 1  | 0 | 0.322280  | 4.420819  | -0.157769 | 25 | 1  | 0 | 0.427172  | -2.652456 | -1.890198 |
| 27 | 6  | 0 | 1.471929  | 2.769253  | -0.965859 | 26 | 1  | 0 | -1.060201 | -3.457940 | -2.489270 |
| 28 | 1  | 0 | 1.622562  | 3.208747  | -1.962461 | 27 | 6  | 0 | -1.011959 | -1.297360 | -2.716708 |
| 29 | 7  | 0 | 1.314732  | 1.301228  | -1.087919 | 28 | 1  | 0 | -0.508805 | -1.280853 | -3.694475 |
| 30 | 1  | 0 | 2.213366  | 0.865547  | -1.285932 | 29 | 7  | 0 | -0.546238 | -0.145134 | -1.911835 |
| 31 | 6  | 0 | 2.746240  | 3.054302  | -0.182371 | 30 | 1  | 0 | -1.012462 | 0.705523  | -2.224407 |
| 32 | 8  | 0 | 2.845880  | 4.353679  | 0.155610  | 31 | 6  | 0 | -2.497963 | -1.125616 | -3.003101 |
| 33 | 8  | 0 | 3.599223  | 2.235482  | 0.054738  | 32 | 8  | 0 | -3.035558 | -2.236054 | -3.541679 |
| 34 | 1  | 0 | -1.808323 | -0.278827 | 5.362992  | 33 | 8  | 0 | -3.112461 | -0.101871 | -2.832402 |
| 35 | 1  | 0 | 0.643708  | 1.079188  | -1.851305 | 34 | 1  | 0 | -2.194799 | -3.111880 | 3.833520  |
| 36 | 1  | 0 | 2.935219  | -3.355091 | 0.543480  | 35 | 1  | 0 | 0.500030  | -0.022803 | -1.998020 |
| 37 | 1  | 0 | 3.680346  | 4.469444  | 0.634160  | 36 | 1  | 0 | -1.783539 | 4.092811  | 1.362112  |
| 38 | 1  | 0 | -1.415043 | -0.392852 | 1.122400  | 37 | 1  | 0 | -3.971152 | -2.054776 | -3.716574 |
| 39 | 16 | 0 | -5.109097 | -0.082285 | -1.970605 | 38 | 1  | 0 | 0.627443  | -0.331415 | 2.184452  |
| 40 | 6  | 0 | -3.621018 | -1.168955 | -2.052379 | 39 | 16 | 0 | 5.468838  | -1.603779 | 0.129134  |
| 41 | 1  | 0 | -3.967703 | -2.141054 | -1.690158 | 40 | 6  | 0 | 4.706311  | 0.076553  | 0.138125  |
| 42 | 1  | 0 | -3.306536 | -1.292046 | -3.090408 | 41 | 1  | 0 | 5.259453  | 0.623342  | 0.907088  |
| 43 | 6  | 0 | -2.411790 | -0.697345 | -1.224869 | 42 | 1  | 0 | 4.885661  | 0.567986  | -0.820226 |
| 44 | 1  | 0 | -1.673658 | -1.503588 | -1.246725 | 43 | 6  | 0 | 3.193549  | 0.115805  | 0.452781  |
| 45 | 7  | 0 | -2.727289 | -0.390133 | 0.184758  | 44 | 1  | 0 | 2.924897  | 1.175136  | 0.521502  |
| 46 | 1  | 0 | -3.068930 | 0.573170  | 0.211203  | 45 | 7  | 0 | 2.786378  | -0.557029 | 1.690962  |
| 47 | 6  | 0 | -1.764177 | 0.566433  | -1.870154 | 46 | 1  | 0 | 2.776296  | -1.557192 | 1.498602  |
| 48 | 8  | 0 | -0.783354 | 0.354727  | -2.637529 | 47 | 6  | 0 | 2.406766  | -0.481521 | -0.739053 |
| 49 | 8  | 0 | -2.271065 | 1.659722  | -1.557169 | 48 | 8  | 0 | 2.079222  | 0.336556  | -1.656402 |
| 50 | 1  | 0 | -3.461831 | -0.993576 | 0.547472  | 49 | 8  | 0 | 2.152489  | -1.699419 | -0.709107 |
| 51 | 1  | 0 | -4.437815 | 1.079602  | -2.133989 | 50 | 1  | 0 | 3.478705  | -0.404845 | 2.419625  |
|    |    |   |           |           |           | 51 | 1  | 0 | 4.501583  | -2.197293 | -0.603346 |

HF=-2143.870873\ZeroPoint=0.3656013\Thermal=0.3952249

G = 21.7 kcal mol<sup>-1</sup>

| Center Number | Atomic Number | Atomic Type | Coordinates (Angstroms) |           |          |
|---------------|---------------|-------------|-------------------------|-----------|----------|
|               |               |             | X                       | Y         | Z        |
| 1             | 46            | 0           | -0.794455               | -0.338918 | 0.162524 |
| 2             | 7             | 0           | -0.646393               | 1.697624  | 0.877388 |
| 3             | 7             | 0           | -1.167663               | 1.754898  | 2.021616 |
| 4             | 6             | 0           | -1.408897               | 0.446100  | 2.528356 |
| 5             | 6             | 0           | -0.416910               | -0.566322 | 2.423127 |
| 6             | 6             | 0           | -0.725686               | -1.852298 | 2.910359 |

HF=-2143.8750606\ZeroPoint=0.3679486\Thermal=0.3986843

G = 11.0 kcal mol<sup>-1</sup>

| Center Number | Atomic Number | Atomic Type | Coordinates (Angstroms) |           |           |
|---------------|---------------|-------------|-------------------------|-----------|-----------|
|               |               |             | X                       | Y         | Z         |
| 1             | 7             | 0           | 2.735942                | 0.388686  | 1.401214  |
| 2             | 7             | 0           | 2.256614                | -0.189618 | 0.373784  |
| 3             | 6             | 0           | 3.208572                | -0.454144 | -0.658041 |
| 4             | 6             | 0           | 4.513229                | -0.844157 | -0.330944 |
| 5             | 6             | 0           | 5.429125                | -1.089133 | -1.346253 |

|    |    |   |           |           |           |
|----|----|---|-----------|-----------|-----------|
| 6  | 1  | 0 | 6.434813  | -1.405775 | -1.094800 |
| 7  | 6  | 0 | 5.055883  | -0.939099 | -2.683650 |
| 8  | 6  | 0 | 3.756278  | -0.549282 | -3.001867 |
| 9  | 1  | 0 | 3.457413  | -0.438114 | -4.037480 |
| 10 | 6  | 0 | 2.827002  | -0.311979 | -1.993449 |
| 11 | 1  | 0 | 1.810925  | -0.031732 | -2.235454 |
| 12 | 6  | 0 | 1.812352  | 0.597677  | 2.412481  |
| 13 | 6  | 0 | 2.218151  | 1.319643  | 3.547450  |
| 14 | 6  | 0 | 1.287668  | 1.584737  | 4.541588  |
| 15 | 1  | 0 | 1.575773  | 2.139629  | 5.426410  |
| 16 | 6  | 0 | -0.030445 | 1.136076  | 4.390577  |
| 17 | 1  | 0 | -0.760257 | 1.354559  | 5.163361  |
| 18 | 6  | 0 | -0.423231 | 0.411703  | 3.260243  |
| 19 | 1  | 0 | -1.460655 | 0.101480  | 3.181704  |
| 20 | 6  | 0 | 0.488660  | 0.109059  | 2.246383  |
| 21 | 1  | 0 | 5.773000  | -1.135334 | -3.472364 |
| 22 | 1  | 0 | 3.244882  | 1.658996  | 3.623640  |
| 23 | 46 | 0 | 0.274221  | -0.830506 | 0.471722  |
| 24 | 16 | 0 | -0.070058 | -1.800984 | -1.680117 |
| 25 | 6  | 0 | -1.888132 | -2.086017 | -1.512284 |
| 26 | 1  | 0 | -2.176767 | -2.901678 | -2.173671 |
| 27 | 1  | 0 | -2.445303 | -1.192756 | -1.805103 |
| 28 | 6  | 0 | -2.208263 | -2.459431 | -0.067752 |
| 29 | 1  | 0 | -1.681448 | -3.389849 | 0.169367  |
| 30 | 7  | 0 | -1.697242 | -1.405000 | 0.843372  |
| 31 | 6  | 0 | -3.686729 | -2.703272 | 0.217505  |
| 32 | 1  | 0 | -2.246081 | -0.537388 | 0.719579  |
| 33 | 1  | 0 | -1.830257 | -1.693834 | 1.809064  |
| 34 | 8  | 0 | -4.252533 | -3.499823 | -0.711339 |
| 35 | 8  | 0 | -4.276357 | -2.273885 | 1.177130  |
| 36 | 1  | 0 | -5.182053 | -3.624582 | -0.465671 |
| 37 | 1  | 0 | 0.524314  | 2.112658  | 0.198909  |
| 38 | 7  | 0 | -0.415477 | 2.457875  | 0.011744  |
| 39 | 6  | 0 | -0.982913 | 2.047660  | -1.320403 |
| 40 | 1  | 0 | -0.481417 | 3.473460  | 0.134100  |
| 41 | 6  | 0 | -1.021137 | 3.174209  | -2.340509 |
| 42 | 1  | 0 | -0.384967 | 1.212765  | -1.694829 |
| 43 | 6  | 0 | -2.393777 | 1.441333  | -0.983373 |
| 44 | 16 | 0 | -1.807403 | 4.717657  | -1.706997 |
| 45 | 1  | 0 | -0.019584 | 3.470878  | -2.659258 |
| 46 | 1  | 0 | -1.573493 | 2.813133  | -3.206391 |
| 47 | 8  | 0 | -3.133958 | 1.204601  | -1.930762 |
| 48 | 8  | 0 | -2.551409 | 1.229492  | 0.263210  |
| 49 | 1  | 0 | -3.028893 | 4.178276  | -1.508031 |
| 50 | 1  | 0 | -1.128921 | 1.974452  | 0.649118  |
| 51 | 1  | 0 | 4.785623  | -0.962923 | 0.709472  |

HF=-2143.8962547\ZeroPoint=0.3732051\Thermal=0.4036364

G = 27.0 kcal mol<sup>-1</sup>

| Center Number | Atomic Number | Atomic Type | Coordinates (Angstroms) |           |           |
|---------------|---------------|-------------|-------------------------|-----------|-----------|
|               |               |             | X                       | Y         | Z         |
| 1             | 7             | 0           | -2.642224               | 0.948821  | -1.048706 |
| 2             | 7             | 0           | -2.050027               | -0.066146 | -0.569349 |
| 3             | 6             | 0           | -2.860449               | -1.011684 | 0.119802  |
| 4             | 6             | 0           | -4.216488               | -1.166945 | -0.204025 |

|    |    |   |           |           |           |
|----|----|---|-----------|-----------|-----------|
| 5  | 6  | 0 | -4.980729 | -2.086253 | 0.498618  |
| 6  | 1  | 0 | -6.024107 | -2.225368 | 0.240344  |
| 7  | 6  | 0 | -4.407270 | -2.836063 | 1.531270  |
| 8  | 6  | 0 | -3.062162 | -2.670370 | 1.850526  |
| 9  | 1  | 0 | -2.612230 | -3.247855 | 2.649059  |
| 10 | 6  | 0 | -2.272214 | -1.769759 | 1.139853  |
| 11 | 1  | 0 | -1.225697 | -1.647263 | 1.393632  |
| 12 | 6  | 0 | -1.781508 | 1.879573  | -1.628064 |
| 13 | 6  | 0 | -2.318955 | 2.819307  | -2.514544 |
| 14 | 6  | 0 | -1.469713 | 3.729518  | -3.132738 |
| 15 | 1  | 0 | -1.871159 | 4.450561  | -3.835101 |
| 16 | 6  | 0 | -0.098505 | 3.719857  | -2.849453 |
| 17 | 1  | 0 | 0.554523  | 4.439766  | -3.330197 |
| 18 | 6  | 0 | 0.424754  | 2.806796  | -1.936551 |
| 19 | 1  | 0 | 1.481173  | 2.847351  | -1.687438 |
| 20 | 6  | 0 | -0.395398 | 1.865905  | -1.296269 |
| 21 | 1  | 0 | -5.010726 | -3.552058 | 2.077618  |
| 22 | 1  | 0 | -3.381211 | 2.802729  | -2.727666 |
| 23 | 46 | 0 | -0.022039 | -0.230632 | -0.897223 |
| 24 | 16 | 0 | 0.134142  | -2.537713 | -1.042074 |
| 25 | 6  | 0 | 1.910003  | -2.630788 | -0.561829 |
| 26 | 1  | 0 | 2.281498  | -3.628685 | -0.792186 |
| 27 | 1  | 0 | 2.000180  | -2.438364 | 0.510655  |
| 28 | 6  | 0 | 2.660627  | -1.574937 | -1.363052 |
| 29 | 1  | 0 | 2.517686  | -1.786637 | -2.428756 |
| 30 | 7  | 0 | 2.062988  | -0.247984 | -1.070297 |
| 31 | 6  | 0 | 4.168362  | -1.511786 | -1.139780 |
| 32 | 1  | 0 | 2.335608  | 0.053380  | -0.104300 |
| 33 | 1  | 0 | 2.429627  | 0.448422  | -1.713698 |
| 34 | 8  | 0 | 4.716188  | -2.738033 | -1.021215 |
| 35 | 8  | 0 | 4.808102  | -0.490751 | -1.124870 |
| 36 | 1  | 0 | 5.672928  | -2.623821 | -0.912829 |
| 37 | 1  | 0 | -0.120509 | 1.792432  | 0.003210  |
| 38 | 7  | 0 | 0.105419  | 2.227313  | 1.378066  |
| 39 | 6  | 0 | 0.007527  | 1.114418  | 2.344475  |
| 40 | 1  | 0 | -0.502342 | 3.005998  | 1.624421  |
| 41 | 6  | 0 | 0.087890  | 1.555539  | 3.814073  |
| 42 | 1  | 0 | -0.956085 | 0.620684  | 2.198583  |
| 43 | 6  | 0 | 1.128174  | 0.079557  | 2.026128  |
| 44 | 16 | 0 | 1.556655  | 2.588004  | 4.239470  |
| 45 | 1  | 0 | -0.772306 | 2.177284  | 4.077739  |
| 46 | 1  | 0 | 0.066919  | 0.663106  | 4.440960  |
| 47 | 8  | 0 | 0.886419  | -1.102384 | 2.300839  |
| 48 | 8  | 0 | 2.179039  | 0.579494  | 1.516981  |
| 49 | 1  | 0 | 2.473369  | 1.784269  | 3.657339  |
| 50 | 1  | 0 | 1.072477  | 2.554959  | 1.384983  |
| 51 | 1  | 0 | -4.643320 | -0.578434 | -1.004981 |

HF=-2143.866579\ZeroPoint=0.3654842\Thermal=0.3953186

G = 19.9 kcal mol<sup>-1</sup>

| Center Number | Atomic Number | Atomic Type | Coordinates (Angstroms) |           |           |
|---------------|---------------|-------------|-------------------------|-----------|-----------|
|               |               |             | X                       | Y         | Z         |
| 1             | 7             | 0           | 2.818675                | -0.655998 | 1.093174  |
| 2             | 7             | 0           | 2.190137                | -0.239954 | 0.082572  |
| 3             | 6             | 0           | 2.886244                | 0.628129  | -0.806520 |

|    |    |   |           |           |           |    |    |   |           |           |           |
|----|----|---|-----------|-----------|-----------|----|----|---|-----------|-----------|-----------|
| 4  | 6  | 0 | 4.284284  | 0.595600  | -0.902608 | 3  | 7  | 0 | -1.644120 | 2.282230  | 0.592887  |
| 5  | 6  | 0 | 4.921215  | 1.470172  | -1.770152 | 4  | 6  | 0 | -0.510987 | 2.712515  | -0.086170 |
| 6  | 1  | 0 | 6.000233  | 1.440468  | -1.866428 | 5  | 6  | 0 | 0.067023  | 1.878839  | -1.084752 |
| 7  | 6  | 0 | 4.174189  | 2.383639  | -2.521841 | 6  | 6  | 0 | 1.183535  | 2.374363  | -1.757528 |
| 8  | 6  | 0 | 2.786022  | 2.412870  | -2.411691 | 7  | 1  | 0 | 1.652320  | 1.782575  | -2.536208 |
| 9  | 1  | 0 | 2.204356  | 3.120060  | -2.990534 | 8  | 6  | 0 | 1.710679  | 3.631823  | -1.442783 |
| 10 | 6  | 0 | 2.126381  | 1.526048  | -1.564859 | 9  | 6  | 0 | 1.138199  | 4.427736  | -0.445700 |
| 11 | 1  | 0 | 1.045096  | 1.551694  | -1.479483 | 10 | 1  | 0 | 1.566035  | 5.393988  | -0.207712 |
| 12 | 6  | 0 | 2.012100  | -1.411614 | 1.969796  | 11 | 6  | 0 | 0.018524  | 3.971729  | 0.234960  |
| 13 | 6  | 0 | 2.561953  | -2.528619 | 2.600487  | 12 | 1  | 0 | -0.456385 | 4.562776  | 1.009305  |
| 14 | 6  | 0 | 1.751685  | -3.311095 | 3.417675  | 13 | 6  | 0 | -3.200556 | 0.632042  | 0.873706  |
| 15 | 1  | 0 | 2.164971  | -4.195201 | 3.889154  | 14 | 6  | 0 | -3.382211 | 0.822982  | 2.246810  |
| 16 | 6  | 0 | 0.412910  | -2.968922 | 3.636210  | 15 | 6  | 0 | -4.493127 | 0.268504  | 2.872434  |
| 17 | 1  | 0 | -0.202074 | -3.584141 | 4.282432  | 16 | 1  | 0 | -4.628468 | 0.402272  | 3.939400  |
| 18 | 6  | 0 | -0.117646 | -1.821974 | 3.051453  | 17 | 6  | 0 | -5.426454 | -0.463766 | 2.136892  |
| 19 | 1  | 0 | -1.137897 | -1.516341 | 3.253946  | 18 | 1  | 0 | -6.288994 | -0.895048 | 2.631224  |
| 20 | 6  | 0 | 0.672123  | -1.028843 | 2.214521  | 19 | 6  | 0 | -5.245746 | -0.642523 | 0.765303  |
| 21 | 1  | 0 | 4.678861  | 3.066045  | -3.196355 | 20 | 1  | 0 | -5.975571 | -1.198010 | 0.187867  |
| 22 | 1  | 0 | 3.596938  | -2.789209 | 2.416302  | 21 | 6  | 0 | -4.128821 | -0.104961 | 0.133372  |
| 23 | 46 | 0 | 0.255127  | -0.935176 | -0.191420 | 22 | 1  | 0 | -3.982521 | -0.217167 | -0.934305 |
| 24 | 16 | 0 | 0.294846  | -1.180453 | -2.474309 | 23 | 16 | 0 | 0.777013  | -0.900238 | -2.450536 |
| 25 | 6  | 0 | -1.515508 | -0.945452 | -2.714398 | 24 | 6  | 0 | 0.130966  | -2.639860 | -2.442582 |
| 26 | 1  | 0 | -1.763719 | -1.238328 | -3.734527 | 25 | 1  | 0 | -0.496502 | -2.787853 | -3.325635 |
| 27 | 1  | 0 | -1.758813 | 0.105874  | -2.547489 | 26 | 1  | 0 | 0.983865  | -3.315198 | -2.496816 |
| 28 | 6  | 0 | -2.227540 | -1.826798 | -1.697092 | 27 | 6  | 0 | -0.664595 | -2.934851 | -1.176217 |
| 29 | 1  | 0 | -1.946388 | -2.869202 | -1.886216 | 28 | 1  | 0 | -1.099831 | -3.941172 | -1.244884 |
| 30 | 7  | 0 | -1.754601 | -1.456922 | -0.340943 | 29 | 7  | 0 | -1.739968 | -1.912681 | -1.023157 |
| 31 | 6  | 0 | -3.751858 | -1.785444 | -1.735506 | 30 | 1  | 0 | -2.139226 | -1.997031 | -0.089760 |
| 32 | 1  | 0 | -2.163107 | -0.531122 | -0.020987 | 31 | 6  | 0 | 0.225268  | -2.906096 | 0.086481  |
| 33 | 1  | 0 | -2.050837 | -2.155101 | 0.336731  | 32 | 8  | 0 | 1.350140  | -3.452844 | -0.008503 |
| 34 | 8  | 0 | -4.224423 | -1.732850 | -2.998339 | 33 | 8  | 0 | -0.221271 | -2.294225 | 1.093606  |
| 35 | 8  | 0 | -4.456648 | -1.847085 | -0.761132 | 34 | 1  | 0 | 2.581527  | 3.992601  | -1.979956 |
| 36 | 1  | 0 | -5.192844 | -1.739264 | -2.950515 | 35 | 1  | 0 | -2.478087 | -2.078822 | -1.702953 |
| 37 | 1  | 0 | 0.335178  | -0.008150 | 1.964307  | 36 | 1  | 0 | -2.648422 | 1.390422  | 2.804096  |
| 38 | 7  | 0 | -0.266788 | 2.074456  | 2.305808  | 37 | 1  | 0 | 2.352335  | -3.135853 | 1.115532  |
| 39 | 6  | 0 | -0.634122 | 2.739223  | 1.051237  | 38 | 1  | 0 | 1.022809  | 0.109075  | 0.369544  |
| 40 | 1  | 0 | 0.198683  | 2.728967  | 2.929450  | 39 | 16 | 0 | 3.784643  | 1.787916  | 1.469822  |
| 41 | 6  | 0 | -1.440873 | 4.048855  | 1.198548  | 40 | 6  | 0 | 3.714290  | 0.453784  | 0.201072  |
| 42 | 1  | 0 | 0.285620  | 3.000021  | 0.518753  | 41 | 1  | 0 | 3.262163  | 0.917479  | -0.676278 |
| 43 | 6  | 0 | -1.409489 | 1.754522  | 0.144686  | 42 | 1  | 0 | 4.726326  | 0.142829  | -0.051559 |
| 44 | 16 | 0 | -2.981499 | 3.915015  | 2.206949  | 43 | 6  | 0 | 2.897298  | -0.777711 | 0.591934  |
| 45 | 1  | 0 | -0.840289 | 4.801111  | 1.717576  | 44 | 1  | 0 | 2.679116  | -1.357393 | -0.308473 |
| 46 | 1  | 0 | -1.684730 | 4.433638  | 0.206455  | 45 | 7  | 0 | 1.558498  | -0.355466 | 1.124692  |
| 47 | 8  | 0 | -1.216308 | 1.829004  | -1.083178 | 46 | 1  | 0 | 0.936990  | -1.172831 | 1.400004  |
| 48 | 8  | 0 | -2.183958 | 0.943667  | 0.746745  | 47 | 6  | 0 | 3.595861  | -1.687034 | 1.634673  |
| 49 | 1  | 0 | -3.450896 | 2.799550  | 1.606848  | 48 | 8  | 0 | 4.555878  | -1.289129 | 2.256939  |
| 50 | 1  | 0 | -1.125918 | 1.785465  | 2.768443  | 49 | 8  | 0 | 3.073568  | -2.881529 | 1.799221  |
| 51 | 1  | 0 | 4.844535  | -0.116461 | -0.311494 | 50 | 1  | 0 | 1.688509  | 0.319820  | 1.884820  |
|    |    |   |           |           |           | 51 | 1  | 0 | 4.520562  | 1.076963  | 2.349288  |

HF=-2143.8764616\ZeroPoint=0.3679541\Thermal=0.398797

G = -6.6 kcal mol<sup>-1</sup>

| Center Number | Atomic Number | Atomic Type | Coordinates (Angstroms) |          |           |
|---------------|---------------|-------------|-------------------------|----------|-----------|
|               |               |             | X                       | Y        | Z         |
| 1             | 46            | 0           | -0.856044               | 0.105736 | -1.170549 |
| 2             | 7             | 0           | -2.064180               | 1.153863 | 0.193953  |

HF=-2143.9248513\ZeroPoint=0.3699996\Thermal=0.3994154

G = 24.1 kcal mol<sup>-1</sup>

| Center Number | Atomic Number | Atomic Type | Coordinates (Angstroms) |          |           |
|---------------|---------------|-------------|-------------------------|----------|-----------|
|               |               |             | X                       | Y        | Z         |
| 1             | 46            | 0           | -0.694301               | 0.314211 | -1.201695 |

|    |    |   |           |           |           |    |    |   |           |           |           |
|----|----|---|-----------|-----------|-----------|----|----|---|-----------|-----------|-----------|
| 2  | 7  | 0 | -1.703335 | 1.345292  | 0.351760  | 1  | 46 | 0 | 0.667271  | 0.510375  | 1.165390  |
| 3  | 7  | 0 | -1.162085 | 2.364891  | 0.869086  | 2  | 7  | 0 | 1.677262  | 1.279170  | -0.545497 |
| 4  | 6  | 0 | 0.011435  | 2.757327  | 0.217654  | 3  | 7  | 0 | 1.202925  | 2.277848  | -1.152598 |
| 5  | 6  | 0 | 0.711172  | 1.834570  | -0.608882 | 4  | 6  | 0 | 0.097790  | 2.849719  | -0.500745 |
| 6  | 6  | 0 | 1.815331  | 2.305478  | -1.329081 | 5  | 6  | 0 | -0.739782 | 2.062020  | 0.326955  |
| 7  | 1  | 0 | 2.361347  | 1.620424  | -1.966989 | 6  | 6  | 0 | -1.763094 | 2.684874  | 1.045894  |
| 8  | 6  | 0 | 2.231648  | 3.629772  | -1.206260 | 7  | 1  | 0 | -2.410921 | 2.085191  | 1.674028  |
| 9  | 6  | 0 | 1.564274  | 4.500554  | -0.341096 | 8  | 6  | 0 | -1.961970 | 4.059134  | 0.930080  |
| 10 | 1  | 0 | 1.910889  | 5.521368  | -0.231285 | 9  | 6  | 0 | -1.160880 | 4.812759  | 0.068599  |
| 11 | 6  | 0 | 0.453028  | 4.068942  | 0.380907  | 10 | 1  | 0 | -1.337556 | 5.876882  | -0.035853 |
| 12 | 1  | 0 | -0.087878 | 4.736143  | 1.040886  | 11 | 6  | 0 | -0.133131 | 4.213685  | -0.659284 |
| 13 | 6  | 0 | -2.867373 | 0.860560  | 1.015392  | 12 | 1  | 0 | 0.504680  | 4.790393  | -1.317701 |
| 14 | 6  | 0 | -2.888745 | 0.714649  | 2.403225  | 13 | 6  | 0 | 2.747224  | 0.605035  | -1.204738 |
| 15 | 6  | 0 | -4.024753 | 0.193994  | 3.012385  | 14 | 6  | 0 | 2.632305  | 0.240430  | -2.546159 |
| 16 | 1  | 0 | -4.039244 | 0.054470  | 4.086732  | 15 | 6  | 0 | 3.667558  | -0.469325 | -3.144153 |
| 17 | 6  | 0 | -5.135893 | -0.159502 | 2.246396  | 16 | 1  | 0 | 3.575271  | -0.780802 | -4.177672 |
| 18 | 1  | 0 | -6.017216 | -0.566956 | 2.727438  | 17 | 6  | 0 | 4.812641  | -0.791740 | -2.416080 |
| 19 | 6  | 0 | -5.111793 | 0.004716  | 0.860921  | 18 | 1  | 0 | 5.614042  | -1.348263 | -2.887298 |
| 20 | 1  | 0 | -5.979850 | -0.254855 | 0.266439  | 19 | 6  | 0 | 4.925689  | -0.405850 | -1.079839 |
| 21 | 6  | 0 | -3.971294 | 0.501984  | 0.238902  | 20 | 1  | 0 | 5.821816  | -0.642608 | -0.518528 |
| 22 | 1  | 0 | -3.939028 | 0.653010  | -0.833892 | 21 | 6  | 0 | 3.885087  | 0.281149  | -0.463934 |
| 23 | 16 | 0 | 0.686461  | -0.772862 | -2.682175 | 22 | 1  | 0 | 3.960869  | 0.604570  | 0.567875  |
| 24 | 6  | 0 | -0.197575 | -2.403830 | -2.787251 | 23 | 16 | 0 | -0.718765 | -0.308953 | 2.795039  |
| 25 | 1  | 0 | -0.706435 | -2.461777 | -3.753076 | 24 | 6  | 0 | 0.133235  | -1.915704 | 3.171264  |
| 26 | 1  | 0 | 0.544595  | -3.197941 | -2.719665 | 25 | 1  | 0 | 0.620522  | -1.828645 | 4.145630  |
| 27 | 6  | 0 | -1.184104 | -2.553529 | -1.640762 | 26 | 1  | 0 | -0.622906 | -2.698978 | 3.208913  |
| 28 | 1  | 0 | -1.835852 | -3.419781 | -1.817002 | 27 | 6  | 0 | 1.134651  | -2.254122 | 2.082712  |
| 29 | 7  | 0 | -2.016378 | -1.312196 | -1.547536 | 28 | 1  | 0 | 1.806967  | -3.054216 | 2.420628  |
| 30 | 1  | 0 | -2.593367 | -1.387877 | -0.709660 | 29 | 7  | 0 | 1.949313  | -1.038432 | 1.757699  |
| 31 | 6  | 0 | -0.501640 | -2.767043 | -0.253819 | 30 | 1  | 0 | 2.496200  | -1.269345 | 0.925006  |
| 32 | 8  | 0 | 0.495911  | -3.527229 | -0.256397 | 31 | 6  | 0 | 0.495894  | -2.737323 | 0.740337  |
| 33 | 8  | 0 | -0.999380 | -2.145572 | 0.710349  | 32 | 8  | 0 | -0.529592 | -3.446543 | 0.852692  |
| 34 | 1  | 0 | 3.090542  | 3.979842  | -1.766581 | 33 | 8  | 0 | 1.073104  | -2.350930 | -0.298710 |
| 35 | 1  | 0 | -2.612561 | -1.205097 | -2.364824 | 34 | 1  | 0 | -2.755602 | 4.540407  | 1.488774  |
| 36 | 1  | 0 | -2.012300 | 0.980081  | 2.979798  | 35 | 1  | 0 | 2.563807  | -0.777875 | 2.525370  |
| 37 | 1  | 0 | 1.436775  | -3.436115 | 1.027819  | 36 | 1  | 0 | 1.728824  | 0.485306  | -3.089403 |
| 38 | 1  | 0 | 0.876863  | 0.737831  | -0.053691 | 37 | 1  | 0 | -1.460204 | -3.597789 | -0.472528 |
| 39 | 16 | 0 | 4.162066  | 0.977681  | 1.456075  | 38 | 1  | 0 | -0.877373 | 0.970965  | 0.015897  |
| 40 | 6  | 0 | 3.688974  | -0.369393 | 0.290311  | 39 | 16 | 0 | -4.047400 | 0.696715  | -1.832930 |
| 41 | 1  | 0 | 3.474404  | 0.135433  | -0.650839 | 40 | 6  | 0 | -3.597146 | -0.372894 | -0.399825 |
| 42 | 1  | 0 | 4.552107  | -1.015364 | 0.133359  | 41 | 1  | 0 | -3.347088 | 0.324960  | 0.399827  |
| 43 | 6  | 0 | 2.476990  | -1.219335 | 0.685797  | 42 | 1  | 0 | -4.480263 | -0.932031 | -0.091137 |
| 44 | 1  | 0 | 2.140744  | -1.741258 | -0.213123 | 43 | 6  | 0 | -2.418965 | -1.331299 | -0.602383 |
| 45 | 7  | 0 | 1.351172  | -0.375294 | 1.129265  | 44 | 1  | 0 | -2.118722 | -1.674182 | 0.391049  |
| 46 | 1  | 0 | 0.524532  | -0.950416 | 1.320470  | 45 | 7  | 0 | -1.257888 | -0.633633 | -1.180119 |
| 47 | 6  | 0 | 2.830777  | -2.265391 | 1.771098  | 46 | 1  | 0 | -0.449508 | -1.256634 | -1.218189 |
| 48 | 8  | 0 | 3.710223  | -2.059344 | 2.582713  | 47 | 6  | 0 | -2.813012 | -2.564871 | -1.446355 |
| 49 | 8  | 0 | 2.099804  | -3.364505 | 1.790491  | 48 | 8  | 0 | -3.687190 | -2.515010 | -2.288015 |
| 50 | 1  | 0 | 1.617241  | 0.146177  | 1.962399  | 49 | 8  | 0 | -2.110717 | -3.668411 | -1.237633 |
| 51 | 1  | 0 | 4.514249  | 0.149054  | 2.460577  | 50 | 1  | 0 | -1.483814 | -0.316274 | -2.119443 |
|    |    |   |           |           |           | 51 | 1  | 0 | -4.415561 | -0.324051 | -2.634060 |

HF=-2143.8732197\ZeroPoint=0.3662323\Thermal=0.39537

G = 22.8 kcal mol<sup>-1</sup>

| Center Number | Atomic Number | Atomic Type | Coordinates (Angstroms) |   |   |
|---------------|---------------|-------------|-------------------------|---|---|
|               |               |             | X                       | Y | Z |

HF=-2143.8741488\ZeroPoint=0.3678762\Thermal=0.3980567

G = 3.0 kcal mol<sup>-1</sup>

| Center Number | Atomic Number | Atomic Type | Coordinates (Angstroms) |   |   |
|---------------|---------------|-------------|-------------------------|---|---|
|               |               |             | X                       | Y | Z |

| 1  | 7  | 0 | -3.173726 | 0.793979  | -0.964090 |
|----|----|---|-----------|-----------|-----------|
| 2  | 7  | 0 | -2.178153 | 1.020152  | -0.214765 |
| 3  | 6  | 0 | -1.950618 | 2.398418  | 0.088960  |
| 4  | 6  | 0 | -3.024998 | 3.253931  | 0.350664  |
| 5  | 6  | 0 | -2.778812 | 4.592239  | 0.635457  |
| 6  | 1  | 0 | -3.609006 | 5.253961  | 0.853615  |
| 7  | 6  | 0 | -1.472123 | 5.082699  | 0.645653  |
| 8  | 6  | 0 | -0.406086 | 4.225700  | 0.375547  |
| 9  | 1  | 0 | 0.610463  | 4.600649  | 0.374957  |
| 10 | 6  | 0 | -0.642533 | 2.881905  | 0.109206  |
| 11 | 1  | 0 | 0.178644  | 2.212094  | -0.100201 |
| 12 | 6  | 0 | -3.387522 | -0.551118 | -1.224226 |
| 13 | 6  | 0 | -4.440904 | -0.905659 | -2.078631 |
| 14 | 6  | 0 | -4.652498 | -2.248433 | -2.363356 |
| 15 | 1  | 0 | -5.458573 | -2.547095 | -3.022529 |
| 16 | 6  | 0 | -3.815417 | -3.212615 | -1.795124 |
| 17 | 1  | 0 | -3.976947 | -4.261193 | -2.022697 |
| 18 | 6  | 0 | -2.767960 | -2.848221 | -0.939064 |
| 19 | 1  | 0 | -2.144566 | -3.636183 | -0.526822 |
| 20 | 6  | 0 | -2.525084 | -1.511601 | -0.633429 |
| 21 | 1  | 0 | -1.285946 | 6.126904  | 0.867962  |
| 22 | 1  | 0 | -5.068240 | -0.128943 | -2.500200 |
| 23 | 46 | 0 | -1.182517 | -0.620542 | 0.578868  |
| 24 | 16 | 0 | 0.374517  | 0.421331  | 2.101322  |
| 25 | 6  | 0 | 0.758088  | -1.130707 | 3.041788  |
| 26 | 1  | 0 | -0.022363 | -1.259657 | 3.795159  |
| 27 | 1  | 0 | 1.716308  | -1.013942 | 3.546303  |
| 28 | 6  | 0 | 0.826049  | -2.355734 | 2.137938  |
| 29 | 1  | 0 | 0.886151  | -3.260713 | 2.755424  |
| 30 | 7  | 0 | -0.390812 | -2.440677 | 1.267296  |
| 31 | 6  | 0 | 2.098486  | -2.349967 | 1.255694  |
| 32 | 1  | 0 | -0.116023 | -2.961261 | 0.432240  |
| 33 | 1  | 0 | -1.137754 | -2.945649 | 1.737552  |
| 34 | 8  | 0 | 1.909892  | -2.566644 | 0.000770  |
| 35 | 8  | 0 | 3.170940  | -2.103722 | 1.804291  |
| 36 | 1  | 0 | 3.175719  | -2.298417 | -0.964609 |
| 37 | 1  | 0 | 1.648482  | 0.352772  | 0.395388  |
| 38 | 7  | 0 | 2.117621  | 0.087623  | -0.526122 |
| 39 | 6  | 0 | 3.612567  | 0.077780  | -0.394577 |
| 40 | 1  | 0 | 1.838504  | 0.744550  | -1.262146 |
| 41 | 6  | 0 | 4.129564  | 1.510924  | -0.306894 |
| 42 | 1  | 0 | 3.826789  | -0.453774 | 0.538881  |
| 43 | 6  | 0 | 4.251176  | -0.742779 | -1.540773 |
| 44 | 16 | 0 | 3.551934  | 2.618410  | -1.663643 |
| 45 | 1  | 0 | 3.774139  | 1.971549  | 0.616812  |
| 46 | 1  | 0 | 5.217161  | 1.497713  | -0.293480 |
| 47 | 8  | 0 | 3.827215  | -1.986249 | -1.675771 |
| 48 | 8  | 0 | 5.099352  | -0.255989 | -2.251150 |
| 49 | 1  | 0 | 4.246039  | 1.994409  | -2.637702 |
| 50 | 1  | 0 | 1.754042  | -0.865058 | -0.703607 |
| 51 | 1  | 0 | -4.032417 | 2.859056  | 0.338565  |

HF=-2143.9093055\ZeroPoint=0.3700928\Thermal=0.399472

G = 23.3 kcal mol<sup>-1</sup>

Center Atomic Atomic Coordinates (Angstroms)

| Number | Number | Type | X         | Y         | Z         |
|--------|--------|------|-----------|-----------|-----------|
| 1      | 7      | 0    | 2.222928  | 1.253193  | 0.618010  |
| 2      | 7      | 0    | 1.818650  | 0.125511  | 0.198679  |
| 3      | 6      | 0    | 2.574061  | -0.453437 | -0.860393 |
| 4      | 6      | 0    | 3.942191  | -0.177167 | -0.999412 |
| 5      | 6      | 0    | 4.643067  | -0.734354 | -2.058034 |
| 6      | 1      | 0    | 5.703750  | -0.537464 | -2.160623 |
| 7      | 6      | 0    | 3.988623  | -1.550062 | -2.986969 |
| 8      | 6      | 0    | 2.629461  | -1.816506 | -2.845963 |
| 9      | 1      | 0    | 2.117252  | -2.448126 | -3.561458 |
| 10     | 6      | 0    | 1.916531  | -1.281226 | -1.776935 |
| 11     | 1      | 0    | 0.864301  | -1.495719 | -1.658399 |
| 12     | 6      | 0    | 1.423105  | 1.820325  | 1.603131  |
| 13     | 6      | 0    | 1.961214  | 2.864890  | 2.363958  |
| 14     | 6      | 0    | 1.206290  | 3.412598  | 3.393333  |
| 15     | 1      | 0    | 1.617469  | 4.212017  | 3.998119  |
| 16     | 6      | 0    | -0.085318 | 2.936919  | 3.648842  |
| 17     | 1      | 0    | -0.670841 | 3.374896  | 4.449390  |
| 18     | 6      | 0    | -0.630388 | 1.923926  | 2.863155  |
| 19     | 1      | 0    | -1.654001 | 1.607572  | 3.042010  |
| 20     | 6      | 0    | 0.098252  | 1.343285  | 1.815260  |
| 21     | 1      | 0    | 4.542517  | -1.979743 | -3.813567 |
| 22     | 1      | 0    | 2.966800  | 3.209245  | 2.154595  |
| 23     | 46     | 0    | 0.187326  | -0.714066 | 1.154706  |
| 24     | 16     | 0    | 0.647257  | -2.942724 | 0.761631  |
| 25     | 6      | 0    | -1.007365 | -3.679784 | 1.157666  |
| 26     | 1      | 0    | -0.910627 | -4.286344 | 2.061593  |
| 27     | 1      | 0    | -1.292502 | -4.317847 | 0.321181  |
| 28     | 6      | 0    | -2.070279 | -2.610738 | 1.333359  |
| 29     | 1      | 0    | -2.934617 | -3.019327 | 1.873819  |
| 30     | 7      | 0    | -1.506271 | -1.466589 | 2.122709  |
| 31     | 6      | 0    | -2.627051 | -2.008445 | 0.006246  |
| 32     | 1      | 0    | -2.232921 | -0.751946 | 2.157203  |
| 33     | 1      | 0    | -1.268811 | -1.749746 | 3.071112  |
| 34     | 8      | 0    | -3.197913 | -0.869494 | 0.181164  |
| 35     | 8      | 0    | -2.492711 | -2.629687 | -1.039532 |
| 36     | 1      | 0    | -3.635069 | -0.168991 | -1.194868 |
| 37     | 1      | 0    | -0.676293 | 1.191050  | 0.750917  |
| 38     | 7      | 0    | -1.728633 | 1.490427  | -0.244859 |
| 39     | 6      | 0    | -1.493722 | 0.970562  | -1.611233 |
| 40     | 1      | 0    | -1.895849 | 2.495478  | -0.280729 |
| 41     | 6      | 0    | -0.310630 | 1.681417  | -2.267315 |
| 42     | 1      | 0    | -1.246124 | -0.091533 | -1.506600 |
| 43     | 6      | 0    | -2.780068 | 1.042762  | -2.478445 |
| 44     | 16     | 0    | -0.406856 | 3.521946  | -2.272857 |
| 45     | 1      | 0    | 0.605147  | 1.449669  | -1.725604 |
| 46     | 1      | 0    | -0.200043 | 1.332314  | -3.291957 |
| 47     | 8      | 0    | -3.836481 | 0.410029  | -2.001699 |
| 48     | 8      | 0    | -2.804004 | 1.661493  | -3.519047 |
| 49     | 1      | 0    | -1.435187 | 3.588628  | -3.142966 |
| 50     | 1      | 0    | -2.526664 | 1.001787  | 0.163697  |
| 51     | 1      | 0    | 4.433216  | 0.457285  | -0.274102 |

HF=-2143.8727405\ZeroPoint=0.3658799\Thermal=0.3951661

G = 18.9 kcal mol<sup>-1</sup>

| Center Number | Atomic Number | Atomic Type | Coordinates (Angstroms) |           |           |
|---------------|---------------|-------------|-------------------------|-----------|-----------|
|               |               |             | X                       | Y         | Z         |
| 1             | 7             | 0           | 2.634044                | 0.876277  | 0.367667  |
| 2             | 7             | 0           | 1.665185                | 0.784707  | -0.436532 |
| 3             | 6             | 0           | 1.452333                | 1.908001  | -1.289787 |
| 4             | 6             | 0           | 2.498034                | 2.793079  | -1.591618 |
| 5             | 6             | 0           | 2.245612                | 3.888192  | -2.402961 |
| 6             | 1             | 0           | 3.052423                | 4.567420  | -2.651559 |
| 7             | 6             | 0           | 0.958948                | 4.115886  | -2.902785 |
| 8             | 6             | 0           | -0.075017               | 3.234918  | -2.597817 |
| 9             | 1             | 0           | -1.073172               | 3.405054  | -2.982071 |
| 10            | 6             | 0           | 0.167767                | 2.121250  | -1.800158 |
| 11            | 1             | 0           | -0.631228               | 1.432180  | -1.569279 |
| 12            | 6             | 0           | 2.792999                | -0.205511 | 1.242565  |
| 13            | 6             | 0           | 4.088424                | -0.496690 | 1.681309  |
| 14            | 6             | 0           | 4.299978                | -1.597448 | 2.504168  |
| 15            | 1             | 0           | 5.305555                | -1.838693 | 2.827763  |
| 16            | 6             | 0           | 3.225064                | -2.387313 | 2.923509  |
| 17            | 1             | 0           | 3.399566                | -3.232182 | 3.579227  |
| 18            | 6             | 0           | 1.927653                | -2.066124 | 2.529882  |
| 19            | 1             | 0           | 1.084246                | -2.636755 | 2.901772  |
| 20            | 6             | 0           | 1.695799                | -0.977384 | 1.688869  |
| 21            | 1             | 0           | 0.769072                | 4.976493  | -3.533555 |
| 22            | 1             | 0           | 4.910201                | 0.124536  | 1.347235  |
| 23            | 46            | 0           | 0.601759                | -1.009461 | -0.491266 |
| 24            | 16            | 0           | 0.229042                | -1.031238 | -2.742327 |
| 25            | 6             | 0           | -0.819267               | -2.548663 | -2.901000 |
| 26            | 1             | 0           | -0.200132               | -3.366286 | -3.277643 |
| 27            | 1             | 0           | -1.607106               | -2.317991 | -3.619192 |
| 28            | 6             | 0           | -1.457968               | -2.899431 | -1.574929 |
| 29            | 1             | 0           | -1.853291               | -3.923182 | -1.603733 |
| 30            | 7             | 0           | -0.431611               | -2.816762 | -0.480064 |
| 31            | 6             | 0           | -2.658630               | -1.982700 | -1.164666 |
| 32            | 1             | 0           | -0.970597               | -2.853721 | 0.389907  |
| 33            | 1             | 0           | 0.220595                | -3.597632 | -0.516407 |
| 34            | 8             | 0           | -2.805906               | -1.904074 | 0.104086  |
| 35            | 8             | 0           | -3.326324               | -1.474643 | -2.055288 |
| 36            | 1             | 0           | -3.793057               | -0.754830 | 0.705527  |
| 37            | 1             | 0           | 0.650677                | -0.600208 | 1.619182  |
| 38            | 7             | 0           | -1.428557               | -0.252721 | 2.050139  |
| 39            | 6             | 0           | -2.018546               | 0.844886  | 1.262995  |
| 40            | 1             | 0           | -1.520032               | -0.038635 | 3.040364  |
| 41            | 6             | 0           | -1.248902               | 2.147673  | 1.484371  |
| 42            | 1             | 0           | -1.906699               | 0.568776  | 0.208097  |
| 43            | 6             | 0           | -3.539525               | 1.017201  | 1.501351  |
| 44            | 16            | 0           | -1.074246               | 2.684448  | 3.239629  |
| 45            | 1             | 0           | -0.224740               | 2.023464  | 1.132056  |
| 46            | 1             | 0           | -1.709941               | 2.955694  | 0.918337  |
| 47            | 8             | 0           | -4.295504               | -0.022328 | 1.179629  |
| 48            | 8             | 0           | -4.010573               | 2.031668  | 1.970061  |
| 49            | 1             | 0           | -2.384580               | 2.948665  | 3.417153  |
| 50            | 1             | 0           | -1.937841               | -1.108252 | 1.848593  |
| 51            | 1             | 0           | 3.486934                | 2.605528  | -1.196531 |

HF=-2143.8806268\ZeroPoint=0.3686977\Thermal=0.3989058

G = -0.8 kcal mol<sup>-1</sup>

| Center Number | Atomic Number | Atomic Type | Coordinates (Angstroms) |           |           |
|---------------|---------------|-------------|-------------------------|-----------|-----------|
|               |               |             | X                       | Y         | Z         |
| 1             | 46            | 0           | 0.531445                | 0.151092  | 0.052878  |
| 2             | 7             | 0           | -0.728859               | -1.519551 | -0.146403 |
| 3             | 7             | 0           | -0.185174               | -2.624827 | -0.439403 |
| 4             | 6             | 0           | 1.201832                | -2.564281 | -0.438483 |
| 5             | 6             | 0           | 1.852176                | -1.328414 | -0.167605 |
| 6             | 6             | 0           | 3.243894                | -1.329762 | -0.141931 |
| 7             | 1             | 0           | 3.785298                | -0.414494 | 0.066273  |
| 8             | 6             | 0           | 3.958559                | -2.509626 | -0.378045 |
| 9             | 6             | 0           | 3.303570                | -3.714980 | -0.649941 |
| 10            | 1             | 0           | 3.875016                | -4.617329 | -0.831936 |
| 11            | 6             | 0           | 1.916949                | -3.746635 | -0.681381 |
| 12            | 1             | 0           | 1.371632                | -4.660721 | -0.885362 |
| 13            | 6             | 0           | -2.152503               | -1.495278 | -0.148732 |
| 14            | 6             | 0           | -2.803230               | -0.807942 | 0.879502  |
| 15            | 6             | 0           | -4.193734               | -0.749896 | 0.893619  |
| 16            | 1             | 0           | -4.700976               | -0.237456 | 1.702976  |
| 17            | 6             | 0           | -4.931352               | -1.357534 | -0.123037 |
| 18            | 1             | 0           | -6.013654               | -1.301247 | -0.116266 |
| 19            | 6             | 0           | -4.273776               | -2.040350 | -1.147263 |
| 20            | 1             | 0           | -4.844805               | -2.510922 | -1.939332 |
| 21            | 6             | 0           | -2.884828               | -2.117699 | -1.162977 |
| 22            | 1             | 0           | -2.358163               | -2.639680 | -1.951494 |
| 23            | 16            | 0           | 2.098576                | 1.840755  | 0.100550  |
| 24            | 6             | 0           | 0.980527                | 3.207163  | 0.634824  |
| 25            | 1             | 0           | 0.842208                | 3.171276  | 1.718753  |
| 26            | 1             | 0           | 1.450242                | 4.156348  | 0.376716  |
| 27            | 6             | 0           | -0.384683               | 3.097696  | -0.040735 |
| 28            | 1             | 0           | -1.037748               | 3.902172  | 0.329279  |
| 29            | 7             | 0           | -0.977934               | 1.769674  | 0.251161  |
| 30            | 1             | 0           | -1.760871               | 1.590226  | -0.374969 |
| 31            | 6             | 0           | -0.340414               | 3.268227  | -1.554549 |
| 32            | 8             | 0           | 0.385491                | 4.341362  | -1.913953 |
| 33            | 8             | 0           | -0.938740               | 2.569830  | -2.333730 |
| 34            | 1             | 0           | 5.043002                | -2.485796 | -0.349156 |
| 35            | 1             | 0           | -1.330155               | 1.760687  | 1.205502  |
| 36            | 1             | 0           | -2.218176               | -0.372316 | 1.680768  |
| 37            | 1             | 0           | 0.372721                | 4.395994  | -2.881298 |
| 38            | 17            | 0           | -0.017664               | 0.590484  | 3.393532  |
| 39            | 1             | 0           | 0.512841                | 0.291981  | 2.202704  |

HF=-1882.6588947\ZeroPoint=0.2784074\Thermal=0.301907

G = 23.6 kcal mol<sup>-1</sup>

| Center Number | Atomic Number | Atomic Type | Coordinates (Angstroms) |           |           |
|---------------|---------------|-------------|-------------------------|-----------|-----------|
|               |               |             | X                       | Y         | Z         |
| 1             | 46            | 0           | 0.488889                | 0.220963  | 0.213241  |
| 2             | 7             | 0           | -0.877604               | -1.290468 | -0.324874 |
| 3             | 7             | 0           | -0.420445               | -2.335523 | -0.859757 |
| 4             | 6             | 0           | 0.978794                | -2.404741 | -0.798672 |
| 5             | 6             | 0           | 1.698396                | -1.581349 | 0.115034  |
| 6             | 6             | 0           | 3.096438                | -1.657814 | 0.123995  |
| 7             | 1             | 0           | 3.648678                | -1.047039 | 0.828185  |

|    |    |   |           |           |           |    |    |   |           |           |           |
|----|----|---|-----------|-----------|-----------|----|----|---|-----------|-----------|-----------|
| 8  | 6  | 0 | 3.758593  | -2.527825 | -0.738393 | 19 | 6  | 0 | -4.519822 | -1.817143 | -1.219930 |
| 9  | 6  | 0 | 3.032353  | -3.350173 | -1.605909 | 20 | 1  | 0 | -5.121962 | -2.432732 | -1.877962 |
| 10 | 1  | 0 | 3.556773  | -4.035352 | -2.261893 | 21 | 6  | 0 | -3.175945 | -2.108944 | -1.046908 |
| 11 | 6  | 0 | 1.639879  | -3.301799 | -1.634406 | 22 | 1  | 0 | -2.710107 | -2.941131 | -1.557765 |
| 12 | 1  | 0 | 1.065227  | -3.930283 | -2.303760 | 23 | 16 | 0 | 2.436100  | 1.199346  | 0.657176  |
| 13 | 6  | 0 | -2.291843 | -1.140448 | -0.288558 | 24 | 6  | 0 | 1.627811  | 2.856551  | 0.542538  |
| 14 | 6  | 0 | -2.852321 | -0.672374 | 0.904289  | 25 | 1  | 0 | 1.144526  | 3.102092  | 1.488884  |
| 15 | 6  | 0 | -4.229439 | -0.485166 | 0.970841  | 26 | 1  | 0 | 2.395180  | 3.596169  | 0.314733  |
| 16 | 1  | 0 | -4.680096 | -0.155993 | 1.899969  | 27 | 6  | 0 | 0.565238  | 2.799911  | -0.542783 |
| 17 | 6  | 0 | -5.029280 | -0.737205 | -0.145678 | 28 | 1  | 0 | -0.018545 | 3.731867  | -0.536429 |
| 18 | 1  | 0 | -6.100198 | -0.578854 | -0.091239 | 29 | 7  | 0 | -0.351096 | 1.680105  | -0.224689 |
| 19 | 6  | 0 | -4.454756 | -1.201735 | -1.329983 | 30 | 1  | 0 | -0.943697 | 1.479758  | -1.030093 |
| 20 | 1  | 0 | -5.076966 | -1.397721 | -2.195451 | 31 | 6  | 0 | 1.106263  | 2.627678  | -1.953888 |
| 21 | 6  | 0 | -3.081956 | -1.415781 | -1.406373 | 32 | 8  | 0 | 2.106998  | 3.490175  | -2.213695 |
| 22 | 1  | 0 | -2.615089 | -1.776042 | -2.314274 | 33 | 8  | 0 | 0.660538  | 1.856932  | -2.767385 |
| 23 | 16 | 0 | 2.169847  | 1.766209  | 0.529949  | 34 | 1  | 0 | 4.648961  | -2.781772 | 0.600236  |
| 24 | 6  | 0 | 1.092838  | 3.118344  | 1.160688  | 35 | 1  | 0 | -0.971092 | 2.011475  | 0.590871  |
| 25 | 1  | 0 | 0.826494  | 2.930728  | 2.203928  | 36 | 1  | 0 | -2.394317 | 0.435566  | 1.120452  |
| 26 | 1  | 0 | 1.644099  | 4.057529  | 1.106584  | 37 | 1  | 0 | 2.387403  | 3.348954  | -3.130337 |
| 27 | 6  | 0 | -0.179110 | 3.200207  | 0.323701  | 38 | 17 | 0 | -1.949768 | 2.775714  | 2.008940  |
| 28 | 1  | 0 | -0.856084 | 3.960923  | 0.738428  | 39 | 1  | 0 | 0.704828  | -1.876027 | 2.030167  |
| 29 | 7  | 0 | -0.850604 | 1.872343  | 0.320800  |    |    |   |           |           |           |
| 30 | 1  | 0 | -1.519434 | 1.821371  | -0.447190 |    |    |   |           |           |           |
| 31 | 6  | 0 | 0.054621  | 3.599422  | -1.129642 |    |    |   |           |           |           |
| 32 | 8  | 0 | 0.867962  | 4.662971  | -1.227979 |    |    |   |           |           |           |
| 33 | 8  | 0 | -0.484306 | 3.070617  | -2.069179 |    |    |   |           |           |           |
| 34 | 1  | 0 | 4.841038  | -2.581355 | -0.727003 |    |    |   |           |           |           |
| 35 | 1  | 0 | -1.358010 | 1.731081  | 1.191922  |    |    |   |           |           |           |
| 36 | 1  | 0 | -2.205967 | -0.549797 | 1.768939  |    |    |   |           |           |           |
| 37 | 1  | 0 | 0.969968  | 4.874502  | -2.168252 |    |    |   |           |           |           |
| 38 | 17 | 0 | 0.120466  | -1.564526 | 2.859306  |    |    |   |           |           |           |
| 39 | 1  | 0 | 1.177271  | -1.392949 | 1.173125  |    |    |   |           |           |           |

HF=-1882.6373031\ZeroPoint=0.2806629\Thermal=0.3037865

G = 2.8 kcal mol<sup>-1</sup>

| Center Number | Atomic Number | Atomic Type | Coordinates (Angstroms) |           |           |
|---------------|---------------|-------------|-------------------------|-----------|-----------|
|               |               |             | X                       | Y         | Z         |
| 1             | 46            | 0           | -0.126564               | 0.268871  | -0.024902 |
| 2             | 7             | 0           | 1.934967                | 0.359694  | -0.099497 |
| 3             | 7             | 0           | 2.478701                | 1.501502  | -0.126484 |
| 4             | 6             | 0           | 1.576026                | 2.547317  | 0.008074  |
| 5             | 6             | 0           | 0.196086                | 2.246529  | 0.156073  |
| 6             | 6             | 0           | -0.667230               | 3.323879  | 0.335862  |
| 7             | 1             | 0           | -1.733363               | 3.169737  | 0.474897  |
| 8             | 6             | 0           | -0.183400               | 4.638544  | 0.362967  |
| 9             | 6             | 0           | 1.177985                | 4.909829  | 0.205205  |
| 10            | 1             | 0           | 1.536040                | 5.932025  | 0.226912  |
| 11            | 6             | 0           | 2.068972                | 3.858491  | 0.028985  |
| 12            | 1             | 0           | 3.132876                | 4.028234  | -0.088614 |
| 13            | 6             | 0           | 2.821569                | -0.753091 | -0.222343 |
| 14            | 6             | 0           | 2.590863                | -1.883022 | 0.563968  |
| 15            | 6             | 0           | 3.455236                | -2.968849 | 0.469111  |
| 16            | 1             | 0           | 3.282568                | -3.842581 | 1.086050  |
| 17            | 6             | 0           | 4.530957                | -2.934994 | -0.417184 |
| 18            | 1             | 0           | 5.193601                | -3.788858 | -0.498708 |
| 19            | 6             | 0           | 4.750710                | -1.803311 | -1.204764 |
| 20            | 1             | 0           | 5.581581                | -1.777978 | -1.900376 |
| 21            | 6             | 0           | 3.903120                | -0.706130 | -1.107209 |
| 22            | 1             | 0           | 4.057359                | 0.178790  | -1.710809 |
| 23            | 16            | 0           | -0.538593               | -2.098816 | -0.442244 |
| 24            | 6             | 0           | -2.375263               | -2.015752 | -0.631383 |
| 25            | 1             | 0           | -2.681259               | -2.665220 | -1.449740 |
| 26            | 1             | 0           | -2.849343               | -2.376667 | 0.286392  |
| 27            | 6             | 0           | -2.840861               | -0.583547 | -0.918444 |
| 28            | 1             | 0           | -2.504651               | -0.295360 | -1.917844 |
| 29            | 7             | 0           | -2.221127               | 0.348590  | 0.055061  |

HF=-1882.6219682\ZeroPoint=0.279069\Thermal=0.3014516

G = 13.5 kcal mol<sup>-1</sup>

| Center Number | Atomic Number | Atomic Type | Coordinates (Angstroms) |           |           |
|---------------|---------------|-------------|-------------------------|-----------|-----------|
|               |               |             | X                       | Y         | Z         |
| 1             | 46            | 0           | 0.558288                | -0.080069 | 0.376168  |
| 2             | 7             | 0           | -1.023807               | -1.517383 | 0.003999  |
| 3             | 7             | 0           | -0.576791               | -2.671989 | -0.231605 |
| 4             | 6             | 0           | 0.815428                | -2.744629 | 0.035707  |
| 5             | 6             | 0           | 1.359580                | -2.158653 | 1.208303  |
| 6             | 6             | 0           | 2.750230                | -2.183522 | 1.401886  |
| 7             | 1             | 0           | 3.165531                | -1.732336 | 2.294349  |
| 8             | 6             | 0           | 3.575437                | -2.778901 | 0.457590  |
| 9             | 6             | 0           | 3.018199                | -3.395234 | -0.668422 |
| 10            | 1             | 0           | 3.666556                | -3.872454 | -1.394126 |
| 11            | 6             | 0           | 1.643844                | -3.392867 | -0.880887 |
| 12            | 1             | 0           | 1.207094                | -3.846305 | -1.761766 |
| 13            | 6             | 0           | -2.406490               | -1.288042 | -0.206535 |
| 14            | 6             | 0           | -2.974819               | -0.194392 | 0.453858  |
| 15            | 6             | 0           | -4.327712               | 0.078903  | 0.277949  |
| 16            | 1             | 0           | -4.756943               | 0.928369  | 0.795220  |
| 17            | 6             | 0           | -5.098138               | -0.726061 | -0.558037 |
| 18            | 1             | 0           | -6.149238               | -0.504894 | -0.704902 |



```

30  1  0  -2.476244  0.065615  1.004472
31  6  0  -4.357792  -0.449532  -0.878121
32  8  0  -4.946621  -1.250077  -1.787178
33  8  0  -4.961855  0.283532  -0.135612
34  1  0  -0.878175  5.458382  0.513211
35  1  0  -2.600333  1.283303  -0.072883
36  1  0  1.757402  -1.897762  1.253919
37  1  0  -5.906292  -1.130427  -1.716668
38  17  0  -1.386167  -1.843790  2.781151
39  1  0  -0.869327  -2.078133  1.525584

```

HF=-1882.653039\ZeroPoint=0.2787244\Thermal=0.3020037

G = 17.7 kcal mol<sup>-1</sup>

```

-----
Center  Atomic  Atomic  Coordinates (Angstroms)
Number  Number  Type    X      Y      Z
-----
  1    46    0    -0.183335  -0.002669  -0.104621
  2     7    0    1.867002  0.212164  -0.074544
  3     7    0    2.334816  1.374219  -0.245796
  4     6    0    1.380290  2.380213  -0.338234
  5     6    0    0.027504  2.143017  0.032254
  6     6    0   -0.882152  3.186932  -0.173438
  7     1    0   -1.907314  3.066643  0.161253
  8     6    0   -0.474069  4.408707  -0.704818
  9     6    0    0.869237  4.630036  -1.026430
 10     1    0    1.182407  5.589715  -1.420023
 11     6    0    1.802854  3.620261  -0.833941
 12     1    0    2.847813  3.759413  -1.083789
 13     6    0    2.832074  -0.832853  0.042016
 14     6    0    2.558010  -1.905056  0.893910
 15     6    0    3.502518  -2.916576  1.040123
 16     1    0    3.298280  -3.742579  1.710708
 17     6    0    4.696851  -2.872335  0.324060
 18     1    0    5.422582  -3.670463  0.429931
 19     6    0    4.956794  -1.803010  -0.536997
 20     1    0    5.880265  -1.773058  -1.103471
 21     6    0    4.032833  -0.776342  -0.676161
 22     1    0    4.218403  0.059745  -1.337131
 23    16    0   -0.333500  -2.243392  -0.723585
 24     6    0   -2.113279  -2.476505  -0.305951
 25     1    0   -2.490610  -3.340409  -0.852831
 26     1    0   -2.228424  -2.664938  0.765553
 27     6    0   -2.897167  -1.224429  -0.697573
 28     1    0   -2.811266  -1.088414  -1.778643
 29     7    0   -2.281682  -0.048014  -0.037877
 30     1    0   -2.487153  -0.031957  0.967481
 31     6    0   -4.376023  -1.317527  -0.343283
 32     8    0   -4.973449  -2.326802  -1.009305
 33     8    0   -4.946454  -0.590182  0.428287
 34     1    0   -1.198189  5.204121  -0.841617
 35     1    0   -2.680240  0.813547  -0.403509
 36     1    0   1.626022  -1.930793  1.440601
 37     1    0   -5.905889  -2.350183  -0.744204
 38    17    0   -1.073181  1.391008  2.720912
 39     1    0   -0.332560  1.569604  1.206535

```

HF=-1882.6288302\ZeroPoint=0.2771222\Thermal=0.2999654

G = -13.1 kcal mol<sup>-1</sup>

```

-----
Center  Atomic  Atomic  Coordinates (Angstroms)
Number  Number  Type    X      Y      Z
-----
  1    46    0   -0.244975  -0.339307  0.413650
  2     7    0    1.723115  0.161024  0.014093
  3     7    0    2.196143  1.286723  -0.247101
  4     6    0    1.402247  2.434696  -0.052175
  5     6    0    0.595318  2.630358  1.077809
  6     6    0   -0.112812  3.820357  1.202182
  7     1    0   -0.723375  3.984770  2.082521
  8     6    0   -0.036038  4.798527  0.209818
  9     6    0    0.786731  4.605430  -0.901073
 10     1    0    0.858292  5.369570  -1.666059
 11     6    0    1.531037  3.438119  -1.019488
 12     1    0    2.190101  3.274766  -1.863432
 13     6    0    2.626009  -0.938285  -0.211632
 14     6    0    2.545283  -2.056481  0.620281
 15     6    0    3.414810  -3.122254  0.406507
 16     1    0    3.369741  -3.984209  1.061676
 17     6    0    4.333657  -3.084699  -0.641134
 18     1    0    4.997409  -3.924596  -0.811625
 19     6    0    4.393598  -1.967542  -1.476388
 20     1    0    5.096640  -1.941250  -2.300834
 21     6    0    3.547823  -0.886564  -1.261329
 22     1    0    3.575781  -0.016243  -1.902863
 23    16    0   -0.773742  -0.009085  -1.835652
 24     6    0   -2.423025  -0.826498  -1.782044
 25     1    0   -3.020773  -0.456694  -2.616132
 26     1    0   -2.317598  -1.910925  -1.886549
 27     6    0   -3.121354  -0.508427  -0.455203
 28     1    0   -3.281749  0.568749  -0.388974
 29     7    0   -2.231605  -0.917414  0.659167
 30     1    0   -2.253752  -1.933176  0.759037
 31     6    0   -4.456784  -1.232135  -0.356494
 32     8    0   -5.391820  -0.646404  -1.130066
 33     8    0   -4.652399  -2.224598  0.299621
 34     1    0   -0.600713  5.718333  0.311230
 35     1    0   -2.546014  -0.549449  1.556054
 36     1    0   1.835082  -2.070169  1.437053
 37     1    0   -6.205999  -1.169412  -1.066137
 38    17    0    0.029306  -0.615363  2.781222
 39     1    0    0.558636  1.882647  1.859409

```

HF=-1882.6805004\ZeroPoint=0.2817838\Thermal=0.3052053

G = -5.3 kcal mol<sup>-1</sup>

```

-----
Center  Atomic  Atomic  Coordinates (Angstroms)
Number  Number  Type    X      Y      Z
-----
  1    46    0   -0.429856  0.159011  -0.243985
  2     7    0    1.463374  1.033893  -0.175799
  3     7    0    1.541512  2.291229  -0.307149
  4     6    0    0.296925  2.901012  -0.391025

```

|    |    |   |           |           |           |    |    |   |           |           |           |
|----|----|---|-----------|-----------|-----------|----|----|---|-----------|-----------|-----------|
| 5  | 6  | 0 | -0.877289 | 2.100002  | -0.323526 | 10 | 1  | 0 | -5.375856 | 1.353411  | -2.321964 |
| 6  | 6  | 0 | -2.101737 | 2.761780  | -0.382142 | 11 | 6  | 0 | -3.397224 | 1.838474  | -1.645171 |
| 7  | 1  | 0 | -3.027663 | 2.199563  | -0.339304 | 12 | 1  | 0 | -3.351532 | 2.800466  | -2.141087 |
| 8  | 6  | 0 | -2.155902 | 4.155232  | -0.497018 | 13 | 6  | 0 | 1.057470  | 2.395559  | -0.366308 |
| 9  | 6  | 0 | -0.990022 | 4.925341  | -0.564598 | 14 | 6  | 0 | 1.881357  | 2.226923  | 0.750924  |
| 10 | 1  | 0 | -1.052679 | 6.003161  | -0.656533 | 15 | 6  | 0 | 3.059400  | 2.963998  | 0.835236  |
| 11 | 6  | 0 | 0.246294  | 4.297802  | -0.510968 | 16 | 1  | 0 | 3.692352  | 2.858412  | 1.708699  |
| 12 | 1  | 0 | 1.172663  | 4.858473  | -0.558625 | 17 | 6  | 0 | 3.420426  | 3.837622  | -0.191042 |
| 13 | 6  | 0 | 2.698104  | 0.332331  | -0.066226 | 18 | 1  | 0 | 4.345498  | 4.398770  | -0.125161 |
| 14 | 6  | 0 | 2.785104  | -0.708306 | 0.863448  | 19 | 6  | 0 | 2.590958  | 3.991648  | -1.303862 |
| 15 | 6  | 0 | 3.975752  | -1.419034 | 0.986508  | 20 | 1  | 0 | 2.874114  | 4.666326  | -2.103439 |
| 16 | 1  | 0 | 4.050576  | -2.214035 | 1.719566  | 21 | 6  | 0 | 1.401078  | 3.278742  | -1.394409 |
| 17 | 6  | 0 | 5.067364  | -1.106951 | 0.175627  | 22 | 1  | 0 | 0.745818  | 3.381232  | -2.249738 |
| 18 | 1  | 0 | 5.989106  | -1.670078 | 0.265404  | 23 | 16 | 0 | -0.610167 | -2.749986 | -0.149756 |
| 19 | 6  | 0 | 4.970606  | -0.068450 | -0.751924 | 24 | 6  | 0 | 0.977607  | -3.213979 | 0.658717  |
| 20 | 1  | 0 | 5.815921  | 0.173173  | -1.386037 | 25 | 1  | 0 | 0.909718  | -3.030582 | 1.733250  |
| 21 | 6  | 0 | 3.790815  | 0.658363  | -0.873907 | 26 | 1  | 0 | 1.156764  | -4.275739 | 0.488731  |
| 22 | 1  | 0 | 3.696902  | 1.464696  | -1.589797 | 27 | 6  | 0 | 2.117313  | -2.375384 | 0.088237  |
| 23 | 16 | 0 | -2.627167 | -0.607279 | -0.255202 | 28 | 1  | 0 | 3.046491  | -2.598217 | 0.633600  |
| 24 | 6  | 0 | -2.305494 | -2.430647 | -0.208670 | 29 | 7  | 0 | 1.770035  | -0.947039 | 0.235541  |
| 25 | 1  | 0 | -2.268121 | -2.768873 | 0.829408  | 30 | 1  | 0 | 2.429843  | -0.351616 | -0.259168 |
| 26 | 1  | 0 | -3.126879 | -2.937927 | -0.712854 | 31 | 6  | 0 | 2.421868  | -2.646021 | -1.379544 |
| 27 | 6  | 0 | -0.977824 | -2.786425 | -0.874932 | 32 | 8  | 0 | 2.510687  | -3.964959 | -1.635284 |
| 28 | 1  | 0 | -0.791339 | -3.861719 | -0.727542 | 33 | 8  | 0 | 2.629740  | -1.788443 | -2.199904 |
| 29 | 7  | 0 | 0.102574  | -1.978322 | -0.274582 | 34 | 1  | 0 | -5.435487 | -0.847884 | -1.192670 |
| 30 | 1  | 0 | 0.986402  | -2.145963 | -0.747985 | 35 | 1  | 0 | 1.711622  | -0.682701 | 1.228179  |
| 31 | 6  | 0 | -0.952502 | -2.577991 | -2.383925 | 36 | 1  | 0 | 1.563008  | 1.564521  | 1.549902  |
| 32 | 8  | 0 | -2.060879 | -3.063736 | -2.976374 | 37 | 1  | 0 | 2.718656  | -4.068943 | -2.575904 |
| 33 | 8  | 0 | -0.027122 | -2.099040 | -2.988383 | 38 | 1  | 0 | -1.800814 | 0.100147  | 0.883624  |
| 34 | 1  | 0 | -3.122839 | 4.646488  | -0.535169 | 39 | 6  | 0 | -0.739833 | 0.152596  | 4.639707  |
| 35 | 1  | 0 | 0.187972  | -2.211983 | 0.714739  | 40 | 1  | 0 | -1.023329 | -0.855027 | 4.959920  |
| 36 | 1  | 0 | 1.938492  | -0.927119 | 1.504113  | 41 | 6  | 0 | -0.569234 | 0.139933  | 3.121379  |
| 37 | 1  | 0 | -1.973445 | -2.912986 | -3.929499 | 42 | 8  | 0 | -1.634076 | 0.308709  | 2.449749  |
| 38 | 1  | 0 | -2.219156 | -0.449169 | 1.922399  | 43 | 8  | 0 | 0.587247  | -0.052526 | 2.662720  |
| 39 | 6  | 0 | -0.636194 | -0.725632 | 4.738113  | 44 | 1  | 0 | -1.539484 | 0.833773  | 4.932764  |
| 40 | 1  | 0 | -1.524902 | -0.833567 | 5.362494  | 45 | 1  | 0 | 0.196920  | 0.419235  | 5.130145  |
| 41 | 6  | 0 | -0.973900 | -1.010698 | 3.297934  |    |    |   |           |           |           |
| 42 | 8  | 0 | -2.052367 | -0.347611 | 2.899623  |    |    |   |           |           |           |
| 43 | 8  | 0 | -0.320449 | -1.757331 | 2.587645  |    |    |   |           |           |           |
| 44 | 1  | 0 | -0.302109 | 0.312025  | 4.822620  |    |    |   |           |           |           |
| 45 | 1  | 0 | 0.152884  | -1.394432 | 5.075175  |    |    |   |           |           |           |

HF=-1650.9473183\ZeroPoint=0.3280615\Thermal=0.3541038

G = 22.6 kcal mol<sup>-1</sup>

HF=-1651.0035693\ZeroPoint=0.3316914\Thermal=0.3584326

G = 28.8 kcal mol<sup>-1</sup>

| Center Number | Atomic Number | Atomic Type | Coordinates (Angstroms) |           |           |
|---------------|---------------|-------------|-------------------------|-----------|-----------|
|               |               |             | X                       | Y         | Z         |
| 1             | 46            | 0           | -0.261524               | -0.475806 | -0.165761 |
| 2             | 7             | 0           | -0.134882               | 1.620202  | -0.432073 |
| 3             | 7             | 0           | -1.162138               | 2.211231  | -0.866507 |
| 4             | 6             | 0           | -2.298740               | 1.392480  | -0.911150 |
| 5             | 6             | 0           | -2.321934               | 0.142686  | -0.232667 |
| 6             | 6             | 0           | -3.465160               | -0.654289 | -0.351427 |
| 7             | 1             | 0           | -3.497789               | -1.600971 | 0.174763  |
| 8             | 6             | 0           | -4.553661               | -0.223171 | -1.108425 |
| 9             | 6             | 0           | -4.520627               | 1.020385  | -1.745251 |

| Center Number | Atomic Number | Atomic Type | Coordinates (Angstroms) |           |           |
|---------------|---------------|-------------|-------------------------|-----------|-----------|
|               |               |             | X                       | Y         | Z         |
| 1             | 46            | 0           | -0.566090               | 0.151006  | 0.043009  |
| 2             | 7             | 0           | 1.172762                | 1.359036  | -0.194707 |
| 3             | 7             | 0           | 0.872935                | 2.575464  | -0.294697 |
| 4             | 6             | 0           | -0.507114               | 2.761640  | 0.017720  |
| 5             | 6             | 0           | -1.074242               | 2.131947  | 1.158418  |
| 6             | 6             | 0           | -2.450511               | 2.298152  | 1.398303  |
| 7             | 1             | 0           | -2.889821               | 1.813379  | 2.260940  |
| 8             | 6             | 0           | -3.226818               | 3.067257  | 0.543774  |
| 9             | 6             | 0           | -2.635898               | 3.720801  | -0.544950 |
| 10            | 1             | 0           | -3.245279               | 4.334397  | -1.198402 |
| 11            | 6             | 0           | -1.279085               | 3.582700  | -0.808080 |
| 12            | 1             | 0           | -0.815025               | 4.066402  | -1.658480 |
| 13            | 6             | 0           | 2.513591                | 0.979741  | -0.465858 |
| 14            | 6             | 0           | 2.989442                | -0.168568 | 0.174077  |

|    |    |   |           |           |           |    |    |   |           |           |           |
|----|----|---|-----------|-----------|-----------|----|----|---|-----------|-----------|-----------|
| 15 | 6  | 0 | 4.295413  | -0.583048 | -0.069786 | 20 | 1  | 0 | -6.375168 | -1.073807 | -0.619505 |
| 16 | 1  | 0 | 4.676438  | -1.462355 | 0.435646  | 21 | 6  | 0 | -4.371978 | -0.328851 | -0.461808 |
| 17 | 6  | 0 | 5.104447  | 0.128861  | -0.954617 | 22 | 1  | 0 | -4.487275 | 0.422990  | -1.231401 |
| 18 | 1  | 0 | 6.116824  | -0.205330 | -1.151107 | 23 | 16 | 0 | -0.226767 | -2.538011 | -0.247826 |
| 19 | 6  | 0 | 4.614015  | 1.271315  | -1.594579 | 24 | 6  | 0 | 1.499711  | -2.909439 | -0.775534 |
| 20 | 1  | 0 | 5.242672  | 1.816578  | -2.288844 | 25 | 1  | 0 | 1.797669  | -3.878711 | -0.374028 |
| 21 | 6  | 0 | 3.319167  | 1.708041  | -1.350250 | 26 | 1  | 0 | 1.553845  | -2.961219 | -1.867742 |
| 22 | 1  | 0 | 2.917875  | 2.585322  | -1.840501 | 27 | 6  | 0 | 2.456303  | -1.826861 | -0.267658 |
| 23 | 16 | 0 | -2.620019 | -0.876436 | 0.077305  | 28 | 1  | 0 | 2.470848  | -1.846153 | 0.823052  |
| 24 | 6  | 0 | -2.023294 | -2.619227 | 0.004674  | 29 | 7  | 0 | 1.980550  | -0.486678 | -0.689230 |
| 25 | 1  | 0 | -1.706886 | -2.943696 | 0.997078  | 30 | 1  | 0 | 2.221816  | -0.339468 | -1.669247 |
| 26 | 1  | 0 | -2.842411 | -3.250261 | -0.340429 | 31 | 6  | 0 | 3.864046  | -2.060866 | -0.795008 |
| 27 | 6  | 0 | -0.827406 | -2.698572 | -0.934689 | 32 | 8  | 0 | 4.480454  | -3.061931 | -0.135415 |
| 28 | 1  | 0 | -0.398817 | -3.711620 | -0.900071 | 33 | 8  | 0 | 4.362449  | -1.460612 | -1.715593 |
| 29 | 7  | 0 | 0.181084  | -1.724767 | -0.475203 | 34 | 1  | 0 | 1.706596  | 4.676963  | -1.557745 |
| 30 | 1  | 0 | 0.919032  | -1.620141 | -1.168675 | 35 | 1  | 0 | 2.471390  | 0.222476  | -0.135178 |
| 31 | 6  | 0 | -1.158580 | -2.434885 | -2.397840 | 36 | 1  | 0 | -1.993833 | -1.534604 | 1.655987  |
| 32 | 8  | 0 | -2.235488 | -3.137793 | -2.801852 | 37 | 1  | 0 | 5.350004  | -3.196302 | -0.542797 |
| 33 | 8  | 0 | -0.503886 | -1.738274 | -3.131860 | 38 | 1  | 0 | 0.604625  | 1.100953  | 1.489494  |
| 34 | 1  | 0 | -4.288710 | 3.177046  | 0.727313  | 39 | 6  | 0 | 2.767093  | 2.050942  | 3.684211  |
| 35 | 1  | 0 | 0.582974  | -2.030698 | 0.480485  | 40 | 1  | 0 | 2.363298  | 1.481961  | 4.524314  |
| 36 | 1  | 0 | 2.356518  | -0.687905 | 0.882750  | 41 | 6  | 0 | 2.248771  | 1.485532  | 2.390593  |
| 37 | 1  | 0 | -2.378043 | -2.941841 | -3.739911 | 42 | 8  | 0 | 0.916342  | 1.438094  | 2.362756  |
| 38 | 1  | 0 | -0.439589 | 1.679441  | 1.919120  | 43 | 8  | 0 | 2.959887  | 1.116680  | 1.473256  |
| 39 | 6  | 0 | 0.771085  | -1.981434 | 4.271163  | 44 | 1  | 0 | 3.854168  | 2.019990  | 3.691549  |
| 40 | 1  | 0 | -0.187680 | -2.474994 | 4.458880  | 45 | 1  | 0 | 2.420246  | 3.081583  | 3.791574  |
| 41 | 6  | 0 | 0.797977  | -1.506606 | 2.821227  |    |    |   |           |           |           |
| 42 | 8  | 0 | 0.639379  | -0.288881 | 2.576991  |    |    |   |           |           |           |
| 43 | 8  | 0 | 0.973255  | -2.412778 | 1.937707  |    |    |   |           |           |           |
| 44 | 1  | 0 | 0.876797  | -1.142269 | 4.958781  |    |    |   |           |           |           |
| 45 | 1  | 0 | 1.556891  | -2.719767 | 4.442255  |    |    |   |           |           |           |

HF=-1650.9913558\ZeroPoint=0.3317644\Thermal=0.3587381

G = 20.8 kcal mol<sup>-1</sup>

HF=-1650.9566718\ZeroPoint=0.3298889\Thermal=0.3568572

G = 1.7 kcal mol<sup>-1</sup>

| Center Number | Atomic Number | Atomic Type | Coordinates (Angstroms) |           |           |
|---------------|---------------|-------------|-------------------------|-----------|-----------|
|               |               |             | X                       | Y         | Z         |
| 1             | 46            | 0           | -0.063572               | -0.167058 | -0.401300 |
| 2             | 7             | 0           | -2.044816               | 0.388124  | -0.155058 |
| 3             | 7             | 0           | -2.355180               | 1.590569  | -0.408200 |
| 4             | 6             | 0           | -1.272303               | 2.395191  | -0.729351 |
| 5             | 6             | 0           | 0.030168                | 1.830167  | -0.728922 |
| 6             | 6             | 0           | 1.089345                | 2.682756  | -1.038173 |
| 7             | 1             | 0           | 2.111100                | 2.316887  | -1.040282 |
| 8             | 6             | 0           | 0.863655                | 4.033169  | -1.328313 |
| 9             | 6             | 0           | -0.429128               | 4.566980  | -1.322349 |
| 10            | 1             | 0           | -0.586761               | 5.614467  | -1.550054 |
| 11            | 6             | 0           | -1.507764               | 3.746532  | -1.020345 |
| 12            | 1             | 0           | -2.523549               | 4.124276  | -1.006430 |
| 13            | 6             | 0           | -3.137069               | -0.468217 | 0.181241  |
| 14            | 6             | 0           | -2.955187               | -1.437291 | 1.169470  |
| 15            | 6             | 0           | -4.018687               | -2.262858 | 1.521001  |
| 16            | 1             | 0           | -3.878842               | -3.011796 | 2.291477  |
| 17            | 6             | 0           | -5.250374               | -2.134984 | 0.881358  |
| 18            | 1             | 0           | -6.071953               | -2.789542 | 1.148843  |
| 19            | 6             | 0           | -5.422034               | -1.168578 | -0.111996 |

| Center Number | Atomic Number | Atomic Type | Coordinates (Angstroms) |           |           |
|---------------|---------------|-------------|-------------------------|-----------|-----------|
|               |               |             | X                       | Y         | Z         |
| 1             | 46            | 0           | -0.006393               | -0.139981 | -0.292178 |
| 2             | 7             | 0           | -2.010647               | 0.348713  | -0.109884 |
| 3             | 7             | 0           | -2.343029               | 1.538938  | -0.377543 |
| 4             | 6             | 0           | -1.274453               | 2.392380  | -0.647085 |
| 5             | 6             | 0           | 0.050659                | 2.049079  | -0.264823 |
| 6             | 6             | 0           | 1.084685                | 2.912039  | -0.644875 |
| 7             | 1             | 0           | 2.094425                | 2.684869  | -0.318880 |
| 8             | 6             | 0           | 0.813872                | 4.077857  | -1.359410 |
| 9             | 6             | 0           | -0.502033               | 4.416584  | -1.692639 |
| 10            | 1             | 0           | -0.704779               | 5.333006  | -2.234397 |
| 11            | 6             | 0           | -1.552691               | 3.582302  | -1.328241 |
| 12            | 1             | 0           | -2.578050               | 3.816953  | -1.587605 |
| 13            | 6             | 0           | -3.079097               | -0.544722 | 0.196555  |
| 14            | 6             | 0           | -2.830119               | -1.595811 | 1.082383  |
| 15            | 6             | 0           | -3.862743               | -2.467601 | 1.414104  |
| 16            | 1             | 0           | -3.674187               | -3.276784 | 2.109364  |
| 17            | 6             | 0           | -5.126580               | -2.305975 | 0.850444  |
| 18            | 1             | 0           | -5.924503               | -2.995593 | 1.100659  |
| 19            | 6             | 0           | -5.364102               | -1.259293 | -0.044528 |
| 20            | 1             | 0           | -6.343638               | -1.139653 | -0.492679 |
| 21            | 6             | 0           | -4.347967               | -0.371629 | -0.370272 |
| 22            | 1             | 0           | -4.514742               | 0.443040  | -1.062031 |
| 23            | 16            | 0           | -0.192823               | -2.395279 | -0.786611 |
| 24            | 6             | 0           | 1.583818                | -2.723461 | -1.171069 |

|                                                        |        |        |                         |           |           |    |    |   |           |           |           |
|--------------------------------------------------------|--------|--------|-------------------------|-----------|-----------|----|----|---|-----------|-----------|-----------|
| 25                                                     | 1      | 0      | 1.792795                | -3.773730 | -0.962881 | 10 | 1  | 0 | -1.732387 | 5.550466  | -1.072397 |
| 26                                                     | 1      | 0      | 1.773973                | -2.534557 | -2.231486 | 11 | 6  | 0 | -2.116715 | 3.469766  | -0.719621 |
| 27                                                     | 6      | 0      | 2.471458                | -1.815686 | -0.316834 | 12 | 1  | 0 | -2.782318 | 3.347020  | -1.565254 |
| 28                                                     | 1      | 0      | 2.368305                | -2.085574 | 0.734867  | 13 | 6  | 0 | -2.552608 | -1.103059 | -0.503228 |
| 29                                                     | 7      | 0      | 2.033711                | -0.411730 | -0.475588 | 14 | 6  | 0 | -2.136074 | -2.307073 | 0.068688  |
| 30                                                     | 1      | 0      | 2.359085                | -0.060737 | -1.376545 | 15 | 6  | 0 | -2.836998 | -3.475037 | -0.214706 |
| 31                                                     | 6      | 0      | 3.928146                | -1.955509 | -0.737695 | 16 | 1  | 0 | -2.524346 | -4.408328 | 0.238330  |
| 32                                                     | 8      | 0      | 4.498227                | -3.048698 | -0.193069 | 17 | 6  | 0 | -3.929192 | -3.445716 | -1.080392 |
| 33                                                     | 8      | 0      | 4.493098                | -1.213114 | -1.501049 | 18 | 1  | 0 | -4.463432 | -4.360217 | -1.311126 |
| 34                                                     | 1      | 0      | 1.625948                | 4.740582  | -1.637034 | 19 | 6  | 0 | -4.329491 | -2.239201 | -1.658900 |
| 35                                                     | 1      | 0      | 2.438398                | 0.200887  | 0.278529  | 20 | 1  | 0 | -5.169297 | -2.217288 | -2.343649 |
| 36                                                     | 1      | 0      | -1.844584               | -1.713546 | 1.512289  | 21 | 6  | 0 | -3.650645 | -1.062628 | -1.368376 |
| 37                                                     | 1      | 0      | 5.406954                | -3.109380 | -0.526146 | 22 | 1  | 0 | -3.944908 | -0.120967 | -1.811466 |
| 38                                                     | 1      | 0      | 0.298424                | 1.543505  | 0.862173  | 23 | 16 | 0 | 0.609836  | 0.237573  | -2.159130 |
| 39                                                     | 6      | 0      | 2.396317                | 1.609165  | 3.918599  | 24 | 6  | 0 | 2.451542  | 0.297892  | -2.093534 |
| 40                                                     | 1      | 0      | 1.664132                | 1.217577  | 4.625990  | 25 | 1  | 0 | 2.840979  | 0.028604  | -3.076289 |
| 41                                                     | 6      | 0      | 1.927537                | 1.386454  | 2.489302  | 26 | 1  | 0 | 2.788951  | 1.310211  | -1.851124 |
| 42                                                     | 8      | 0      | 0.676715                | 1.505847  | 2.282862  | 27 | 6  | 0 | 2.963568  | -0.677136 | -1.027181 |
| 43                                                     | 8      | 0      | 2.785382                | 1.128827  | 1.606462  | 28 | 1  | 0 | 2.703982  | -1.696573 | -1.315015 |
| 44                                                     | 1      | 0      | 3.373748                | 1.154490  | 4.078285  | 29 | 7  | 0 | 2.299800  | -0.369265 | 0.256894  |
| 45                                                     | 1      | 0      | 2.479659                | 2.686854  | 4.089438  | 30 | 1  | 0 | 2.713650  | 0.473981  | 0.654879  |
| -----                                                  |        |        |                         |           |           |    |    |   |           |           |           |
| HF=-1650.9597256\ZeroPoint=0.328074\Thermal=0.35412    |        |        |                         |           |           |    |    |   |           |           |           |
| G = -1.8 kcal mol <sup>-1</sup>                        |        |        |                         |           |           |    |    |   |           |           |           |
| -----                                                  |        |        |                         |           |           |    |    |   |           |           |           |
| Center                                                 | Atomic | Atomic | Coordinates (Angstroms) |           |           | 31 | 6  | 0 | 4.473545  | -0.552520 | -0.882824 |
| Number                                                 | Number | Type   | X                       | Y         | Z         | 32 | 8  | 0 | 5.121588  | -1.234018 | -1.849612 |
| -----                                                  |        |        |                         |           |           |    |    |   |           |           |           |
| 1                                                      | 46     | 0      | 0.247858                | -0.137808 | 0.100319  | 33 | 8  | 0 | 5.029855  | 0.108297  | -0.041648 |
| 2                                                      | 7      | 0      | -1.809434               | 0.086231  | -0.189407 | 34 | 1  | 0 | -0.247654 | 5.793024  | 0.901343  |
| 3                                                      | 7      | 0      | -2.455916               | 1.152688  | -0.266301 | 35 | 1  | 0 | 2.388262  | -1.111516 | 0.973209  |
| 4                                                      | 6      | 0      | -1.815629               | 2.359325  | 0.076828  | 36 | 1  | 0 | -1.289213 | -2.312938 | 0.742504  |
| 5                                                      | 6      | 0      | -0.992171               | 2.490296  | 1.205800  | 37 | 1  | 0 | 6.072422  | -1.080420 | -1.737083 |
| 6                                                      | 6      | 0      | -0.441553               | 3.733662  | 1.497114  | 38 | 1  | 0 | -0.828973 | 1.644289  | 1.861667  |
| 7                                                      | 1      | 0      | 0.181119                | 3.846616  | 2.377151  | 39 | 6  | 0 | 0.148896  | -1.530395 | 4.278555  |
| 8                                                      | 6      | 0      | -0.690388               | 4.830690  | 0.671203  | 40 | 1  | 0 | -0.892614 | -1.858886 | 4.265414  |
| 9                                                      | 6      | 0      | -1.528156               | 4.696586  | -0.437239 | 41 | 6  | 0 | 0.645825  | -1.329402 | 2.855530  |
| -----                                                  |        |        |                         |           |           |    |    |   |           |           |           |
| HF=-1650.9953787\ZeroPoint=0.3313774\Thermal=0.3584102 |        |        |                         |           |           |    |    |   |           |           |           |

## Structures from Table S4

**Table S4. PATH I:** B3LYP-D3/6-311+G\*\*/SDD(Pd)/gas phase free energies for the pre- and postreaction complexes and the transition states for **the first D-transfer to D1-1**. Free energies relative to **B1-1** (in kcal mol<sup>-1</sup>).

| D-source→            | Cys <sup>4D</sup> ·DCI | Cys <sup>4D</sup> ·DCI       | DCI  |
|----------------------|------------------------|------------------------------|------|
| Donor group→         | COOD                   | ND <sub>3</sub> <sup>+</sup> | DCI  |
| Prereaction complex  | <b>-17.6</b>           | -15.6                        | 15.3 |
| Transition state     | <b>9.0</b>             | 10.8                         | 24.0 |
| Postreaction complex | <b>-3.5</b>            | 3.3                          | -8.2 |

G = -17.6 kcal mol<sup>-1</sup>

| Center Number | Atomic Number | Atomic Type | Coordinates (Angstroms) |           |           |
|---------------|---------------|-------------|-------------------------|-----------|-----------|
|               |               |             | X                       | Y         | Z         |
| 1             | 46            | 0           | 2.587172                | -0.471695 | -0.513895 |
| 2             | 7             | 0           | 1.011647                | 0.614954  | -1.409004 |
| 3             | 7             | 0           | -0.058289               | -0.084293 | -1.577785 |
| 4             | 6             | 0           | 0.176794                | -1.460308 | -1.646986 |
| 5             | 6             | 0           | 1.426636                | -1.939052 | -1.183716 |
| 6             | 6             | 0           | 1.662486                | -3.308811 | -1.258530 |
| 7             | 1             | 0           | 2.598988                | -3.719723 | -0.899575 |
| 8             | 6             | 0           | 0.699922                | -4.166361 | -1.798708 |
| 9             | 6             | 0           | -0.515582               | -3.672640 | -2.278212 |
| 10            | 1             | 0           | -1.253088               | -4.346252 | -2.696005 |
| 11            | 6             | 0           | -0.782624               | -2.315642 | -2.203046 |
| 12            | 1             | 0           | -1.705469               | -1.911356 | -2.594157 |
| 13            | 6             | 0           | 0.791573                | 1.993244  | -1.311167 |
| 14            | 6             | 0           | 1.865309                | 2.874727  | -1.497672 |
| 15            | 6             | 0           | 1.643751                | 4.240719  | -1.399149 |
| 16            | 1             | 0           | 2.459107                | 4.936994  | -1.556307 |
| 17            | 6             | 0           | 0.357368                | 4.710933  | -1.116858 |
| 18            | 1             | 0           | 0.182475                | 5.778299  | -1.032912 |
| 19            | 6             | 0           | -0.714498               | 3.826108  | -0.972265 |
| 20            | 1             | 0           | -1.706282               | 4.224033  | -0.791999 |
| 21            | 6             | 0           | -0.528253               | 2.446752  | -1.084237 |
| 22            | 16            | 0           | 3.749268                | -1.856981 | 0.957098  |
| 23            | 6             | 0           | 4.621696                | -0.560561 | 1.945683  |
| 24            | 1             | 0           | 3.974900                | -0.231849 | 2.762188  |
| 25            | 1             | 0           | 5.524988                | -1.000702 | 2.366410  |
| 26            | 6             | 0           | 4.974839                | 0.656534  | 1.096293  |
| 27            | 1             | 0           | 5.414153                | 1.423270  | 1.752967  |
| 28            | 7             | 0           | 3.761389                | 1.168043  | 0.426890  |
| 29            | 1             | 0           | 4.011618                | 1.920739  | -0.206372 |
| 30            | 6             | 0           | 6.026145                | 0.395220  | 0.023682  |
| 31            | 8             | 0           | 7.060350                | -0.323254 | 0.497782  |
| 32            | 8             | 0           | 5.971925                | 0.834371  | -1.097083 |
| 33            | 1             | 0           | 0.901560                | -5.231025 | -1.845340 |
| 34            | 1             | 0           | 3.106451                | 1.527497  | 1.119423  |
| 35            | 1             | 0           | 2.836037                | 2.481092  | -1.774013 |
| 36            | 1             | 0           | 7.696307                | -0.438507 | -0.224402 |
| 37            | 1             | 0           | 1.919526                | -1.645391 | 2.047283  |

|    |    |   |           |           |           |
|----|----|---|-----------|-----------|-----------|
| 38 | 16 | 0 | -2.975044 | 1.582528  | 3.432449  |
| 39 | 6  | 0 | -1.172877 | 1.325354  | 3.190112  |
| 40 | 1  | 0 | -0.745139 | 2.159521  | 2.637706  |
| 41 | 1  | 0 | -0.725189 | 1.319093  | 4.186307  |
| 42 | 6  | 0 | -0.842730 | 0.029839  | 2.436393  |
| 43 | 1  | 0 | -1.193988 | 0.130407  | 1.399928  |
| 44 | 7  | 0 | -1.547148 | -1.157410 | 3.002951  |
| 45 | 1  | 0 | -2.433823 | -0.835230 | 3.411665  |
| 46 | 6  | 0 | 0.662632  | -0.199855 | 2.350149  |
| 47 | 8  | 0 | 0.984113  | -1.481187 | 2.387566  |
| 48 | 8  | 0 | 1.432987  | 0.729162  | 2.235291  |
| 49 | 1  | 0 | -0.992555 | -1.642703 | 3.706771  |
| 50 | 1  | 0 | -3.250679 | 1.836774  | 2.108281  |
| 51 | 46 | 0 | -1.851595 | 0.947003  | -1.070894 |
| 52 | 16 | 0 | -3.548247 | 2.243309  | -0.192586 |
| 53 | 6  | 0 | -4.949966 | 1.058449  | -0.382416 |
| 54 | 1  | 0 | -5.724850 | 1.320521  | 0.339755  |
| 55 | 1  | 0 | -5.368374 | 1.155732  | -1.387748 |
| 56 | 6  | 0 | -4.469678 | -0.375510 | -0.150956 |
| 57 | 1  | 0 | -4.144197 | -0.494862 | 0.882349  |
| 58 | 7  | 0 | -3.317423 | -0.680091 | -1.023835 |
| 59 | 6  | 0 | -5.605172 | -1.356325 | -0.412552 |
| 60 | 1  | 0 | -3.675271 | -0.895496 | -1.954554 |
| 61 | 1  | 0 | -2.894196 | -1.544988 | -0.655560 |
| 62 | 8  | 0 | -6.446793 | -1.431942 | 0.637234  |
| 63 | 8  | 0 | -5.767192 | -1.954741 | -1.446606 |
| 64 | 1  | 0 | -7.153401 | -2.054822 | 0.407796  |
| 65 | 1  | 0 | -1.822738 | -1.897083 | 2.212839  |
| 66 | 17 | 0 | -2.475883 | -2.994965 | 0.959010  |

HF=-3453.6776377\ZeroPoint=0.4598708\Thermal=0.5022469

G = 9.0 kcal mol<sup>-1</sup>

| Center Number | Atomic Number | Atomic Type | Coordinates (Angstroms) |           |           |
|---------------|---------------|-------------|-------------------------|-----------|-----------|
|               |               |             | X                       | Y         | Z         |
| 1             | 46            | 0           | 2.671516                | -0.615885 | -0.380015 |
| 2             | 7             | 0           | 1.023850                | 0.469003  | -1.170126 |
| 3             | 7             | 0           | -0.062755               | -0.199883 | -1.352139 |
| 4             | 6             | 0           | 0.114667                | -1.593208 | -1.325502 |
| 5             | 6             | 0           | 1.235916                | -2.123723 | -0.628779 |

|    |    |   |           |           |           |
|----|----|---|-----------|-----------|-----------|
| 6  | 6  | 0 | 1.410485  | -3.514838 | -0.643351 |
| 7  | 1  | 0 | 2.235427  | -3.943101 | -0.086421 |
| 8  | 6  | 0 | 0.512234  | -4.341812 | -1.315473 |
| 9  | 6  | 0 | -0.580499 | -3.791959 | -1.984225 |
| 10 | 1  | 0 | -1.287858 | -4.437648 | -2.490011 |
| 11 | 6  | 0 | -0.786686 | -2.414623 | -1.992338 |
| 12 | 1  | 0 | -1.620918 | -1.983727 | -2.528464 |
| 13 | 6  | 0 | 0.859628  | 1.851749  | -1.215228 |
| 14 | 6  | 0 | 1.974234  | 2.676085  | -1.442764 |
| 15 | 6  | 0 | 1.796906  | 4.048781  | -1.484070 |
| 16 | 1  | 0 | 2.641094  | 4.699926  | -1.676938 |
| 17 | 6  | 0 | 0.517237  | 4.585882  | -1.295384 |
| 18 | 1  | 0 | 0.380557  | 5.661938  | -1.315293 |
| 19 | 6  | 0 | -0.592145 | 3.757541  | -1.116339 |
| 20 | 1  | 0 | -1.574744 | 4.202643  | -1.015066 |
| 21 | 6  | 0 | -0.454126 | 2.367959  | -1.097436 |
| 22 | 16 | 0 | 4.311515  | -1.966599 | 0.486311  |
| 23 | 6  | 0 | 4.980047  | -0.780597 | 1.721048  |
| 24 | 1  | 0 | 4.315931  | -0.743159 | 2.588056  |
| 25 | 1  | 0 | 5.958248  | -1.137602 | 2.044336  |
| 26 | 6  | 0 | 5.087175  | 0.616336  | 1.117341  |
| 27 | 1  | 0 | 5.418669  | 1.322538  | 1.893452  |
| 28 | 7  | 0 | 3.772214  | 1.013756  | 0.579132  |
| 29 | 1  | 0 | 3.855255  | 1.880382  | 0.057639  |
| 30 | 6  | 0 | 6.106266  | 0.732984  | -0.009997 |
| 31 | 8  | 0 | 7.278948  | 0.157645  | 0.311287  |
| 32 | 8  | 0 | 5.911110  | 1.328892  | -1.039795 |
| 33 | 1  | 0 | 0.651578  | -5.416351 | -1.302153 |
| 34 | 1  | 0 | 3.082033  | 1.145623  | 1.327395  |
| 35 | 1  | 0 | 2.939827  | 2.230962  | -1.650270 |
| 36 | 1  | 0 | 7.883005  | 0.278250  | -0.436850 |
| 37 | 1  | 0 | 1.237360  | -1.666281 | 0.629469  |
| 38 | 16 | 0 | -3.053179 | 1.746437  | 3.541511  |
| 39 | 6  | 0 | -1.264086 | 1.384905  | 3.282707  |
| 40 | 1  | 0 | -0.769630 | 2.236197  | 2.820395  |
| 41 | 1  | 0 | -0.830629 | 1.247916  | 4.276306  |
| 42 | 6  | 0 | -1.031031 | 0.163683  | 2.402316  |
| 43 | 1  | 0 | -1.490362 | 0.347307  | 1.422690  |
| 44 | 7  | 0 | -1.693193 | -1.064483 | 2.944133  |
| 45 | 1  | 0 | -2.554573 | -0.795911 | 3.431737  |
| 46 | 6  | 0 | 0.453994  | -0.129880 | 2.102310  |
| 47 | 8  | 0 | 0.688271  | -1.366780 | 1.866338  |
| 48 | 8  | 0 | 1.236057  | 0.822565  | 2.053065  |
| 49 | 1  | 0 | -1.072883 | -1.576047 | 3.571213  |
| 50 | 1  | 0 | -3.320315 | 2.008610  | 2.229521  |
| 51 | 46 | 0 | -1.837236 | 0.926259  | -1.054413 |
| 52 | 16 | 0 | -3.507634 | 2.318008  | -0.292966 |
| 53 | 6  | 0 | -4.953047 | 1.198025  | -0.541732 |
| 54 | 1  | 0 | -5.751213 | 1.510363  | 0.133403  |
| 55 | 1  | 0 | -5.311455 | 1.297431  | -1.569850 |
| 56 | 6  | 0 | -4.557021 | -0.252910 | -0.262235 |
| 57 | 1  | 0 | -4.301733 | -0.372407 | 0.790772  |
| 58 | 7  | 0 | -3.368408 | -0.627263 | -1.056971 |
| 59 | 6  | 0 | -5.718930 | -1.183421 | -0.584793 |
| 60 | 1  | 0 | -3.678978 | -0.844131 | -2.004364 |
| 61 | 1  | 0 | -3.014982 | -1.506796 | -0.643745 |
| 62 | 8  | 0 | -6.628088 | -1.204805 | 0.408734  |
| 63 | 8  | 0 | -5.842784 | -1.787378 | -1.621258 |

|    |    |   |           |           |          |
|----|----|---|-----------|-----------|----------|
| 64 | 1  | 0 | -7.346865 | -1.798334 | 0.142314 |
| 65 | 1  | 0 | -1.985655 | -1.765149 | 2.159941 |
| 66 | 17 | 0 | -2.740688 | -2.953350 | 0.933832 |

HF=-3453.6328328\ZeroPoint=0.4562125\Thermal=0.4982375

G = -3.5 kcal mol<sup>-1</sup>

| Center Number | Atomic Number | Atomic Type | Coordinates (Angstroms) |           |           |
|---------------|---------------|-------------|-------------------------|-----------|-----------|
|               |               |             | X                       | Y         | Z         |
| 1             | 46            | 0           | -2.438325               | 0.780156  | -0.290224 |
| 2             | 7             | 0           | -0.664178               | -0.089606 | -1.286538 |
| 3             | 7             | 0           | 0.374765                | 0.669608  | -1.217965 |
| 4             | 6             | 0           | 0.105882                | 2.024756  | -0.922416 |
| 5             | 6             | 0           | -0.804975               | 2.370071  | 0.095291  |
| 6             | 6             | 0           | -1.137092               | 3.716957  | 0.295019  |
| 7             | 1             | 0           | -1.819554               | 3.972000  | 1.095956  |
| 8             | 6             | 0           | -0.553740               | 4.700436  | -0.494156 |
| 9             | 6             | 0           | 0.384604                | 4.344487  | -1.466811 |
| 10            | 1             | 0           | 0.853112                | 5.114386  | -2.069047 |
| 11            | 6             | 0           | 0.721377                | 3.009365  | -1.686843 |
| 12            | 1             | 0           | 1.420564                | 2.724869  | -2.463521 |
| 13            | 6             | 0           | -0.358484               | -1.395107 | -1.663194 |
| 14            | 6             | 0           | -1.381168               | -2.279548 | -2.037338 |
| 15            | 6             | 0           | -1.055701               | -3.568051 | -2.415390 |
| 16            | 1             | 0           | -1.834583               | -4.261484 | -2.707382 |
| 17            | 6             | 0           | 0.284856                | -3.973650 | -2.407095 |
| 18            | 1             | 0           | 0.537529                | -4.990110 | -2.689862 |
| 19            | 6             | 0           | 1.304239                | -3.087171 | -2.054883 |
| 20            | 1             | 0           | 2.333344                | -3.426258 | -2.075064 |
| 21            | 6             | 0           | 1.013219                | -1.771135 | -1.696494 |
| 22            | 16            | 0           | -4.012908               | 1.853164  | 0.977724  |
| 23            | 6             | 0           | -4.767083               | 0.330600  | 1.683425  |
| 24            | 1             | 0           | -4.066350               | -0.134248 | 2.378834  |
| 25            | 1             | 0           | -5.682394               | 0.611963  | 2.205113  |
| 26            | 6             | 0           | -5.046433               | -0.628968 | 0.537850  |
| 27            | 1             | 0           | -5.385320               | -1.595459 | 0.937351  |
| 28            | 7             | 0           | -3.798757               | -0.842058 | -0.239001 |
| 29            | 1             | 0           | -4.057740               | -1.123376 | -1.182724 |
| 30            | 6             | 0           | -6.134470               | -0.164300 | -0.422654 |
| 31            | 8             | 0           | -7.222752               | 0.283304  | 0.227178  |
| 32            | 8             | 0           | -6.058712               | -0.247455 | -1.623801 |
| 33            | 1             | 0           | -0.802205               | 5.742967  | -0.337879 |
| 34            | 1             | 0           | -3.203820               | -1.578655 | 0.218764  |
| 35            | 1             | 0           | -2.407264               | -1.947381 | -2.048581 |
| 36            | 1             | 0           | -7.880149               | 0.540147  | -0.436977 |
| 37            | 1             | 0           | -0.939077               | 1.672556  | 0.936621  |
| 38            | 16            | 0           | 2.463664                | -3.402297 | 2.197963  |
| 39            | 6             | 0           | 0.656554                | -3.250329 | 1.880987  |
| 40            | 1             | 0           | 0.402191                | -3.664643 | 0.907753  |
| 41            | 1             | 0           | 0.182159                | -3.873557 | 2.643154  |
| 42            | 6             | 0           | 0.114087                | -1.822172 | 1.938131  |
| 43            | 1             | 0           | 0.490989                | -1.260811 | 1.082626  |
| 44            | 7             | 0           | 0.541952                | -1.079739 | 3.164314  |
| 45            | 1             | 0           | 1.264523                | -1.585882 | 3.680763  |
| 46            | 6             | 0           | -1.444079               | -1.809155 | 1.900726  |
| 47            | 8             | 0           | -2.017394               | -1.193663 | 2.823022  |

|    |    |   |           |           |           |    |    |   |           |           |           |
|----|----|---|-----------|-----------|-----------|----|----|---|-----------|-----------|-----------|
| 48 | 8  | 0 | -1.949474 | -2.413007 | 0.923489  | 32 | 8  | 0 | -4.893542 | 2.381875  | 0.372344  |
| 49 | 1  | 0 | -0.325980 | -0.931562 | 3.708075  | 33 | 1  | 0 | -0.368645 | -2.794409 | 4.775893  |
| 50 | 1  | 0 | 2.895343  | -2.647054 | 1.154207  | 34 | 1  | 0 | -2.991753 | -0.008671 | -1.731853 |
| 51 | 46 | 0 | 2.211201  | -0.267128 | -1.163416 | 35 | 1  | 0 | -2.493389 | 3.052480  | -0.149300 |
| 52 | 16 | 0 | 4.082456  | -1.560683 | -0.882922 | 36 | 1  | 0 | -7.019932 | 1.733605  | 0.994775  |
| 53 | 6  | 0 | 5.274471  | -0.233987 | -0.401170 | 37 | 1  | 0 | -1.411844 | -1.847930 | 0.031095  |
| 54 | 1  | 0 | 6.059347  | -0.681368 | 0.209592  | 38 | 16 | 0 | 0.652929  | -3.817783 | -3.203759 |
| 55 | 1  | 0 | 5.732284  | 0.179059  | -1.304684 | 39 | 6  | 0 | 0.403622  | -4.328056 | -1.457630 |
| 56 | 6  | 0 | 4.562980  | 0.874179  | 0.381719  | 40 | 1  | 0 | -0.395823 | -5.069570 | -1.381984 |
| 57 | 1  | 0 | 4.184752  | 0.477541  | 1.325735  | 41 | 1  | 0 | 1.336056  | -4.814367 | -1.170229 |
| 58 | 7  | 0 | 3.397559  | 1.379612  | -0.373991 | 42 | 6  | 0 | 0.136924  | -3.194249 | -0.455965 |
| 59 | 6  | 0 | 5.534230  | 2.007926  | 0.679375  | 43 | 1  | 0 | 0.253878  | -3.583507 | 0.559502  |
| 60 | 1  | 0 | 3.711261  | 2.073663  | -1.051130 | 44 | 7  | 0 | -1.251323 | -2.675742 | -0.573862 |
| 61 | 1  | 0 | 2.777503  | 1.844746  | 0.302138  | 45 | 1  | 0 | -1.942117 | -3.361925 | -0.265223 |
| 62 | 8  | 0 | 6.400483  | 1.675122  | 1.656236  | 46 | 6  | 0 | 1.165445  | -2.074287 | -0.591395 |
| 63 | 8  | 0 | 5.561947  | 3.062415  | 0.092911  | 47 | 8  | 0 | 0.658432  | -0.971305 | -1.119534 |
| 64 | 1  | 0 | 7.006036  | 2.421068  | 1.785670  | 48 | 8  | 0 | 2.307701  | -2.231393 | -0.226114 |
| 65 | 1  | 0 | 0.938880  | -0.125708 | 2.897646  | 49 | 1  | 0 | -1.571434 | -2.355118 | -1.562068 |
| 66 | 17 | 0 | 1.601123  | 1.567102  | 2.212681  | 50 | 1  | 0 | -0.554089 | -3.223502 | -3.394217 |

HF=-3453.654051\ZeroPoint=0.4602939\Thermal=0.5029912

G = -15.6 kcal mol<sup>-1</sup>

| Center Number | Atomic Number | Atomic Type | Coordinates (Angstroms) |           |           |
|---------------|---------------|-------------|-------------------------|-----------|-----------|
|               |               |             | X                       | Y         | Z         |
| 1             | 46            | 0           | -2.248155               | 0.117242  | 0.829400  |
| 2             | 7             | 0           | -0.592376               | 1.395869  | 0.655861  |
| 3             | 7             | 0           | 0.486777                | 0.978446  | 1.222725  |
| 4             | 6             | 0           | 0.268896                | -0.041669 | 2.158925  |
| 5             | 6             | 0           | -1.024315               | -0.620136 | 2.233859  |
| 6             | 6             | 0           | -1.219694               | -1.623527 | 3.184736  |
| 7             | 1             | 0           | -2.191080               | -2.096791 | 3.275202  |
| 8             | 6             | 0           | -0.186348               | -2.019031 | 4.039435  |
| 9             | 6             | 0           | 1.069898                | -1.410332 | 3.971042  |
| 10            | 1             | 0           | 1.857986                | -1.701638 | 4.654997  |
| 11            | 6             | 0           | 1.299217                | -0.413986 | 3.032377  |
| 12            | 1             | 0           | 2.246600                | 0.106225  | 2.999550  |
| 13            | 6             | 0           | -0.413855               | 2.464470  | -0.222366 |
| 14            | 6             | 0           | -1.518587               | 3.255895  | -0.578200 |
| 15            | 6             | 0           | -1.319214               | 4.339166  | -1.420078 |
| 16            | 1             | 0           | -2.155110               | 4.971766  | -1.693850 |
| 17            | 6             | 0           | -0.034748               | 4.619272  | -1.898879 |
| 18            | 1             | 0           | 0.117151                | 5.462148  | -2.564591 |
| 19            | 6             | 0           | 1.062216                | 3.842653  | -1.517198 |
| 20            | 1             | 0           | 2.048063                | 4.098363  | -1.886272 |
| 21            | 6             | 0           | 0.901085                | 2.757691  | -0.655966 |
| 22            | 16            | 0           | -3.921053               | -1.440303 | 1.176443  |
| 23            | 6             | 0           | -4.950708               | -1.144502 | -0.335072 |
| 24            | 1             | 0           | -4.632119               | -1.815888 | -1.133484 |
| 25            | 1             | 0           | -5.988815               | -1.354182 | -0.079429 |
| 26            | 6             | 0           | -4.806920               | 0.290892  | -0.838584 |
| 27            | 1             | 0           | -5.330115               | 0.368836  | -1.802941 |
| 28            | 7             | 0           | -3.372943               | 0.607792  | -0.996953 |
| 29            | 1             | 0           | -3.257424               | 1.564792  | -1.318431 |
| 30            | 6             | 0           | -5.429732               | 1.344514  | 0.065784  |
| 31            | 8             | 0           | -6.679949               | 1.016552  | 0.438577  |

|    |    |   |           |           |           |    |    |   |          |           |           |
|----|----|---|-----------|-----------|-----------|----|----|---|----------|-----------|-----------|
| 51 | 46 | 0 | 2.250843  | 1.520153  | 0.144155  | 52 | 16 | 0 | 3.823234 | 1.990555  | -1.459420 |
| 53 | 6  | 0 | 5.259887  | 1.097028  | -0.729934 | 54 | 1  | 0 | 5.970275 | 0.884959  | -1.529714 |
| 55 | 1  | 0 | 5.755059  | 1.727410  | 0.014867  | 56 | 6  | 0 | 4.795008 | -0.209600 | -0.082680 |
| 57 | 1  | 0 | 4.364238  | -0.858749 | -0.845754 | 58 | 7  | 0 | 3.738874 | 0.070816  | 0.915742  |
| 59 | 6  | 0 | 5.965624  | -0.928606 | 0.573587  | 60 | 1  | 0 | 4.187320 | 0.388995  | 1.774655  |
| 61 | 1  | 0 | 3.271382  | -0.806781 | 1.134638  | 62 | 8  | 0 | 6.792646 | -1.466118 | -0.343525 |
| 63 | 8  | 0 | 6.156734  | -0.989560 | 1.763995  | 64 | 1  | 0 | 7.533631 | -1.879963 | 0.125303  |
| 65 | 17 | 0 | -2.547720 | -1.774304 | -3.070682 | 66 | 1  | 0 | 1.326470 | -0.245390 | -1.130615 |

HF=-3453.6764417\ZeroPoint=0.4611937\Thermal=0.5036638

G = 10.8 kcal mol<sup>-1</sup>

| Center Number | Atomic Number | Atomic Type | Coordinates (Angstroms) |           |           |
|---------------|---------------|-------------|-------------------------|-----------|-----------|
|               |               |             | X                       | Y         | Z         |
| 1             | 46            | 0           | 2.340754                | -0.334370 | -0.536081 |
| 2             | 7             | 0           | 0.513818                | 0.833379  | -0.692471 |
| 3             | 7             | 0           | -0.493706               | 0.163274  | -1.147075 |
| 4             | 6             | 0           | -0.234358               | -1.178674 | -1.462406 |
| 5             | 6             | 0           | 0.857749                | -1.836834 | -0.847472 |
| 6             | 6             | 0           | 1.076136                | -3.184912 | -1.174647 |
| 7             | 1             | 0           | 1.900536                | -3.709649 | -0.704609 |
| 8             | 6             | 0           | 0.251113                | -3.850446 | -2.074587 |
| 9             | 6             | 0           | -0.805568               | -3.169401 | -2.687201 |
| 10            | 1             | 0           | -1.433477               | -3.679004 | -3.408733 |
| 11            | 6             | 0           | -1.052831               | -1.835442 | -2.385139 |
| 12            | 1             | 0           | -1.839215               | -1.288052 | -2.888304 |
| 13            | 6             | 0           | 0.193993                | 2.140223  | -0.343347 |
| 14            | 6             | 0           | 1.166827                | 2.992216  | 0.207296  |
| 15            | 6             | 0           | 0.842589                | 4.310702  | 0.470984  |

|                                                        |        |        |                         |           |           |    |    |   |           |           |           |
|--------------------------------------------------------|--------|--------|-------------------------|-----------|-----------|----|----|---|-----------|-----------|-----------|
| 16                                                     | 1      | 0      | 1.582025                | 4.968829  | 0.910161  |    |    |   |           |           |           |
| 17                                                     | 6      | 0      | -0.447108               | 4.778298  | 0.196985  | 1  | 46 | 0 | 2.317191  | -0.712086 | 0.067135  |
| 18                                                     | 1      | 0      | -0.695101               | 5.816074  | 0.392660  | 2  | 7  | 0 | 0.554524  | 0.190576  | -0.846210 |
| 19                                                     | 6      | 0      | -1.435964               | 3.915744  | -0.281447 | 3  | 7  | 0 | -0.402758 | -0.667079 | -0.836302 |
| 20                                                     | 1      | 0      | -2.441029               | 4.291528  | -0.431456 | 4  | 6  | 0 | -0.072871 | -1.881907 | -0.176225 |
| 21                                                     | 6      | 0      | -1.148605               | 2.578221  | -0.539585 | 5  | 6  | 0 | 0.499147  | -1.836659 | 1.115701  |
| 22                                                     | 16     | 0      | 4.048003                | -1.868206 | -0.371787 | 6  | 6  | 0 | 0.849580  | -3.053704 | 1.729510  |
| 23                                                     | 6      | 0      | 5.290295                | -0.764545 | 0.418582  | 7  | 1  | 0 | 1.298775  | -3.027947 | 2.714511  |
| 24                                                     | 1      | 0      | 5.043431                | -0.627480 | 1.472834  | 8  | 6  | 0 | 0.612525  | -4.261483 | 1.090628  |
| 25                                                     | 1      | 0      | 6.272020                | -1.228344 | 0.322425  | 9  | 6  | 0 | 0.000652  | -4.279609 | -0.170056 |
| 26                                                     | 6      | 0      | 5.253757                | 0.590667  | -0.273142 | 10 | 1  | 0 | -0.188973 | -5.226522 | -0.662277 |
| 27                                                     | 1      | 0      | 5.931400                | 1.284776  | 0.245023  | 11 | 6  | 0 | -0.348016 | -3.096181 | -0.809116 |
| 28                                                     | 7      | 0      | 3.868183                | 1.109630  | -0.207072 | 12 | 1  | 0 | -0.791527 | -3.094115 | -1.797438 |
| 29                                                     | 1      | 0      | 3.772809                | 1.930761  | -0.800247 | 13 | 6  | 0 | 0.200705  | 1.412013  | -1.396811 |
| 30                                                     | 6      | 0      | 5.700856                | 0.573395  | -1.728479 | 14 | 6  | 0 | 1.156362  | 2.430760  | -1.541652 |
| 31                                                     | 8      | 0      | 6.850892                | -0.107977 | -1.889443 | 15 | 6  | 0 | 0.774300  | 3.623676  | -2.129584 |
| 32                                                     | 8      | 0      | 5.135374                | 1.154412  | -2.619936 | 16 | 1  | 0 | 1.493149  | 4.426727  | -2.234217 |
| 33                                                     | 1      | 0      | 0.432899                | -4.892334 | -2.311040 | 17 | 6  | 0 | -0.549589 | 3.800353  | -2.547229 |
| 34                                                     | 1      | 0      | 3.647512                | 1.327515  | 0.786422  | 18 | 1  | 0 | -0.844069 | 4.740558  | -3.001319 |
| 35                                                     | 1      | 0      | 2.127092                | 2.605241  | 0.499643  | 19 | 6  | 0 | -1.510983 | 2.803927  | -2.355864 |
| 36                                                     | 1      | 0      | 7.090834                | -0.063391 | -2.827212 | 20 | 1  | 0 | -2.536763 | 2.987231  | -2.652236 |
| 37                                                     | 1      | 0      | 1.049859                | -1.599266 | 0.418321  | 21 | 6  | 0 | -1.163568 | 1.590716  | -1.771600 |
| 38                                                     | 16     | 0      | -0.105328               | -0.404320 | 4.949223  | 22 | 16 | 0 | 3.967068  | -1.922525 | 1.100909  |
| 39                                                     | 6      | 0      | -0.276908               | -2.016180 | 4.087752  | 23 | 6  | 0 | 5.292320  | -0.646677 | 0.993511  |
| 40                                                     | 1      | 0      | 0.518480                | -2.693668 | 4.409531  | 24 | 1  | 0 | 5.114498  | 0.136171  | 1.732413  |
| 41                                                     | 1      | 0      | -1.223942               | -2.429497 | 4.442148  | 25 | 1  | 0 | 6.249953  | -1.129772 | 1.188409  |
| 42                                                     | 6      | 0      | -0.280873               | -2.005342 | 2.541822  | 26 | 6  | 0 | 5.252859  | -0.027885 | -0.394310 |
| 43                                                     | 1      | 0      | -0.492556               | -3.028029 | 2.216689  | 27 | 1  | 0 | 5.961601  | 0.811192  | -0.449656 |
| 44                                                     | 7      | 0      | 0.997284                | -1.602133 | 1.945264  | 28 | 7  | 0 | 3.883739  | 0.486063  | -0.630158 |
| 45                                                     | 1      | 0      | 1.747296                | -2.235412 | 2.216402  | 29 | 1  | 0 | 3.753043  | 0.690279  | -1.619581 |
| 46                                                     | 6      | 0      | -1.413198               | -1.163861 | 1.959899  | 30 | 6  | 0 | 5.625933  | -0.978530 | -1.523640 |
| 47                                                     | 8      | 0      | -1.087884               | 0.119307  | 1.859642  | 31 | 8  | 0 | 6.753701  | -1.660253 | -1.249934 |
| 48                                                     | 8      | 0      | -2.481046               | -1.631251 | 1.619315  | 32 | 8  | 0 | 5.025786  | -1.065735 | -2.565250 |
| 49                                                     | 1      | 0      | 1.316947                | -0.660408 | 2.229055  | 33 | 1  | 0 | 0.887665  | -5.193695 | 1.568899  |
| 50                                                     | 1      | 0      | 1.035116                | 0.015604  | 4.344112  | 34 | 1  | 0 | 3.736423  | 1.346678  | -0.036511 |
| 51                                                     | 46     | 0      | -2.371582               | 1.057151  | -0.933431 | 35 | 1  | 0 | 2.148410  | 2.318529  | -1.131416 |
| 52                                                     | 16     | 0      | -4.271444               | 2.202478  | -0.337757 | 36 | 1  | 0 | 6.949207  | -2.225657 | -2.012237 |
| 53                                                     | 6      | 0      | -5.514951               | 0.871034  | -0.621147 | 37 | 1  | 0 | 0.454818  | -0.911653 | 1.706113  |
| 54                                                     | 1      | 0      | -6.391223               | 1.085941  | -0.008734 | 38 | 16 | 0 | -0.275046 | 3.898885  | 1.256207  |
| 55                                                     | 1      | 0      | -5.821352               | 0.863580  | -1.671705 | 39 | 6  | 0 | -0.700557 | 3.230280  | 2.917616  |
| 56                                                     | 6      | 0      | -4.930864               | -0.492622 | -0.239569 | 40 | 1  | 0 | 0.050630  | 3.569513  | 3.632483  |
| 57                                                     | 1      | 0      | -4.686150               | -0.500867 | 0.823362  | 41 | 1  | 0 | -1.656603 | 3.679462  | 3.185476  |
| 58                                                     | 7      | 0      | -3.676796               | -0.727654 | -0.989690 | 42 | 6  | 0 | -0.791432 | 1.694471  | 2.981890  |
| 59                                                     | 6      | 0      | -5.934600               | -1.600707 | -0.527300 | 43 | 1  | 0 | -1.090531 | 1.429803  | 4.006297  |
| 60                                                     | 1      | 0      | -3.918763               | -1.049425 | -1.926203 | 44 | 7  | 0 | 0.462528  | 0.994653  | 2.699926  |
| 61                                                     | 1      | 0      | -3.172044               | -1.490431 | -0.540898 | 45 | 1  | 0 | 1.074494  | 1.039549  | 3.508173  |
| 62                                                     | 8      | 0      | -6.946841               | -1.594400 | 0.360442  | 46 | 6  | 0 | -1.921261 | 1.105698  | 2.118349  |
| 63                                                     | 8      | 0      | -5.860233               | -2.373067 | -1.452358 | 47 | 8  | 0 | -2.831280 | 2.011516  | 1.753606  |
| 64                                                     | 1      | 0      | -7.569969               | -2.294557 | 0.112097  | 48 | 8  | 0 | -2.001098 | -0.073441 | 1.837363  |
| 65                                                     | 17     | 0      | 2.847944                | 0.920801  | 2.732226  | 49 | 1  | 0 | 0.982821  | 1.475343  | 1.965037  |
| 66                                                     | 1      | 0      | -1.808637               | 0.618283  | 1.421977  | 50 | 1  | 0 | 1.064914  | 3.690181  | 1.331607  |
| -----                                                  |        |        |                         |           |           | 51 | 46 | 0 | -2.287377 | 0.044523  | -1.212595 |
| HF=-3453.6302252\ZeroPoint=0.4569333\Thermal=0.4992883 |        |        |                         |           |           | 52 | 16 | 0 | -4.298251 | 1.188291  | -1.148194 |
| G = 3.3 kcal mol <sup>-1</sup>                         |        |        |                         |           |           | 53 | 6  | 0 | -5.389169 | -0.252808 | -0.770374 |
| -----                                                  |        |        |                         |           |           | 54 | 1  | 0 | -6.317532 | 0.121470  | -0.337445 |
| Center                                                 | Atomic | Atomic | Coordinates (Angstroms) |           |           | 55 | 1  | 0 | -5.630146 | -0.782434 | -1.696484 |
| Number                                                 | Number | Type   | X                       | Y         | Z         | 56 | 6  | 0 | -4.701562 | -1.209551 | 0.212856  |
|                                                        |        |        |                         |           |           | 57 | 1  | 0 | -4.514064 | -0.685110 | 1.151054  |



|    |    |   |           |           |           |
|----|----|---|-----------|-----------|-----------|
| 58 | 7  | 0 | -3.392395 | -1.640341 | -0.324249 |
| 59 | 6  | 0 | -5.590317 | -2.415063 | 0.486906  |
| 60 | 1  | 0 | -3.532801 | -2.438477 | -0.943039 |
| 61 | 1  | 0 | -2.810092 | -1.960631 | 0.446570  |
| 62 | 8  | 0 | -6.643999 | -2.087010 | 1.259365  |
| 63 | 8  | 0 | -5.402864 | -3.522887 | 0.046080  |
| 64 | 1  | 0 | -7.195265 | -2.877124 | 1.369725  |
| 65 | 17 | 0 | 3.267013  | 2.625403  | 1.406958  |
| 66 | 1  | 0 | -3.414793 | 1.656445  | 1.043291  |

HF=-3453.64377\ZeroPoint=0.4597871\Thermal=0.502759

G = 15.3 kcal mol<sup>-1</sup>

| Center Number | Atomic Number | Atomic Type | Coordinates (Angstroms) |           |           |
|---------------|---------------|-------------|-------------------------|-----------|-----------|
|               |               |             | X                       | Y         | Z         |
| 1             | 46            | 0           | 2.354196                | 0.056973  | 0.096837  |
| 2             | 46            | 0           | -2.513985               | 0.031787  | -0.248342 |
| 3             | 7             | 0           | 0.330662                | -0.457101 | -0.016215 |
| 4             | 7             | 0           | -0.491001               | 0.530587  | -0.193523 |
| 5             | 6             | 0           | 0.107143                | 1.796182  | -0.208653 |
| 6             | 6             | 0           | 1.481169                | 1.868939  | 0.124642  |
| 7             | 6             | 0           | 2.051532                | 3.133970  | 0.229221  |
| 8             | 1             | 0           | 3.088661                | 3.256701  | 0.526082  |
| 9             | 6             | 0           | 1.307996                | 4.287241  | -0.041441 |
| 10            | 6             | 0           | -0.020996               | 4.187210  | -0.452622 |
| 11            | 1             | 0           | -0.588202               | 5.076799  | -0.698140 |
| 12            | 6             | 0           | -0.628442               | 2.942508  | -0.541068 |
| 13            | 1             | 0           | -1.656907               | 2.857777  | -0.862615 |
| 14            | 6             | 0           | -0.272026               | -1.720961 | -0.006297 |
| 15            | 6             | 0           | -1.654143               | -1.778856 | -0.317525 |
| 16            | 6             | 0           | -2.229643               | -3.042732 | -0.436665 |
| 17            | 1             | 0           | -3.269502               | -3.156472 | -0.730309 |
| 18            | 6             | 0           | -1.487632               | -4.203949 | -0.200004 |
| 19            | 1             | 0           | -1.958994               | -5.175003 | -0.309897 |
| 20            | 6             | 0           | -0.151582               | -4.117109 | 0.192622  |
| 21            | 1             | 0           | 0.415633                | -5.013254 | 0.413155  |
| 22            | 6             | 0           | 0.462863                | -2.877012 | 0.293030  |
| 23            | 1             | 0           | 1.497125                | -2.803934 | 0.598411  |
| 24            | 16            | 0           | -3.661423               | 2.089874  | 0.270080  |
| 25            | 6             | 0           | -5.360642               | 1.510028  | -0.117677 |
| 26            | 1             | 0           | -5.564101               | 1.596280  | -1.190441 |
| 27            | 1             | 0           | -6.083482               | 2.127524  | 0.416318  |
| 28            | 6             | 0           | -5.519744               | 0.049955  | 0.314485  |
| 29            | 1             | 0           | -5.389559               | -0.010680 | 1.396448  |
| 30            | 6             | 0           | -6.888460               | -0.494714 | -0.066087 |
| 31            | 8             | 0           | -7.857958               | 0.019435  | 0.713250  |
| 32            | 8             | 0           | -7.093265               | -1.266203 | -0.971959 |
| 33            | 7             | 0           | -4.458254               | -0.769128 | -0.324744 |
| 34            | 1             | 0           | -4.444394               | -1.695733 | 0.093856  |
| 35            | 1             | 0           | -4.704908               | -0.914260 | -1.304989 |
| 36            | 16            | 0           | 3.556940                | -1.986792 | -0.311991 |
| 37            | 6             | 0           | 5.150466                | -1.412958 | 0.401858  |
| 38            | 1             | 0           | 5.110279                | -1.441034 | 1.493732  |
| 39            | 1             | 0           | 5.952445                | -2.071190 | 0.067889  |
| 40            | 6             | 0           | 5.432064                | 0.013764  | -0.047608 |
| 41            | 1             | 0           | 6.343630                | 0.393662  | 0.436234  |

|    |    |   |           |           |           |
|----|----|---|-----------|-----------|-----------|
| 42 | 7  | 0 | 4.283543  | 0.894555  | 0.307578  |
| 43 | 1  | 0 | 4.310638  | 1.720445  | -0.289667 |
| 44 | 6  | 0 | 5.666160  | 0.158892  | -1.548104 |
| 45 | 8  | 0 | 5.201394  | 1.047099  | -2.218730 |
| 46 | 8  | 0 | 6.517646  | -0.767455 | -2.014083 |
| 47 | 1  | 0 | 1.774773  | 5.261917  | 0.053518  |
| 48 | 1  | 0 | 6.626290  | -0.618924 | -2.965548 |
| 49 | 1  | 0 | 4.364399  | 1.192197  | 1.278131  |
| 50 | 1  | 0 | -8.709506 | -0.324512 | 0.401836  |
| 51 | 1  | 0 | 2.564820  | -0.161214 | 2.242656  |
| 52 | 17 | 0 | 3.109953  | -0.075715 | 3.450648  |

HF=-2731.5126104\ZeroPoint=0.3603878\Thermal=0.3940292

G = 24.0 kcal mol<sup>-1</sup>

| Center Number | Atomic Number | Atomic Type | Coordinates (Angstroms) |           |           |
|---------------|---------------|-------------|-------------------------|-----------|-----------|
|               |               |             | X                       | Y         | Z         |
| 1             | 46            | 0           | -2.358572               | 0.136175  | 0.144232  |
| 2             | 46            | 0           | 2.465379                | 0.060054  | -0.293712 |
| 3             | 7             | 0           | -0.358886               | 0.644215  | -0.111852 |
| 4             | 7             | 0           | 0.440540                | -0.351172 | -0.325758 |
| 5             | 6             | 0           | -0.179378               | -1.610250 | -0.365532 |
| 6             | 6             | 0           | -1.422065               | -1.772664 | 0.300262  |
| 7             | 6             | 0           | -2.033805               | -3.030557 | 0.217372  |
| 8             | 1             | 0           | -2.948157               | -3.210890 | 0.772990  |
| 9             | 6             | 0           | -1.454780               | -4.075086 | -0.495729 |
| 10            | 6             | 0           | -0.243181               | -3.878043 | -1.163163 |
| 11            | 1             | 0           | 0.203577                | -4.684301 | -1.732512 |
| 12            | 6             | 0           | 0.400322                | -2.649436 | -1.102371 |
| 13            | 1             | 0           | 1.329626                | -2.485919 | -1.629430 |
| 14            | 6             | 0           | 0.274544                | 1.885284  | -0.005807 |
| 15            | 6             | 0           | 1.682742                | 1.905267  | -0.179288 |
| 16            | 6             | 0           | 2.308878                | 3.150381  | -0.146512 |
| 17            | 1             | 0           | 3.378895                | 3.239574  | -0.311576 |
| 18            | 6             | 0           | 1.582189                | 4.322012  | 0.083099  |
| 19            | 1             | 0           | 2.095254                | 5.277983  | 0.096591  |
| 20            | 6             | 0           | 0.203949                | 4.269543  | 0.302756  |
| 21            | 1             | 0           | -0.353605               | 5.176785  | 0.501350  |
| 22            | 6             | 0           | -0.458834               | 3.052291  | 0.259838  |
| 23            | 1             | 0           | -1.526465               | 3.000055  | 0.419534  |
| 24            | 16            | 0           | 3.450727                | -2.125268 | -0.178188 |
| 25            | 6             | 0           | 5.200849                | -1.596176 | -0.372472 |
| 26            | 1             | 0           | 5.456363                | -1.489274 | -1.432216 |
| 27            | 1             | 0           | 5.856166                | -2.352540 | 0.060232  |
| 28            | 6             | 0           | 5.424752                | -0.260590 | 0.342256  |
| 29            | 1             | 0           | 5.241566                | -0.399660 | 1.409294  |
| 30            | 6             | 0           | 6.841899                | 0.251945  | 0.130636  |
| 31            | 8             | 0           | 7.737969                | -0.476289 | 0.821119  |
| 32            | 8             | 0           | 7.136762                | 1.175813  | -0.588617 |
| 33            | 7             | 0           | 4.449253                | 0.738892  | -0.166412 |
| 34            | 1             | 0           | 4.474893                | 1.570605  | 0.418565  |
| 35            | 1             | 0           | 4.749718                | 1.045538  | -1.092850 |
| 36            | 16            | 0           | -3.552189               | 1.999957  | -0.635935 |
| 37            | 6             | 0           | -5.035337               | 1.723064  | 0.420190  |
| 38            | 1             | 0           | -4.824842               | 2.010537  | 1.452618  |
| 39            | 1             | 0           | -5.851610               | 2.341479  | 0.046410  |

|                                                        |        |        |                         |           |           |    |    |   |           |           |           |
|--------------------------------------------------------|--------|--------|-------------------------|-----------|-----------|----|----|---|-----------|-----------|-----------|
| 40                                                     | 6      | 0      | -5.420171               | 0.250092  | 0.379319  | 18 | 6  | 0 | 1.811077  | 4.334163  | -0.441045 |
| 41                                                     | 1      | 0      | -6.238561               | 0.050391  | 1.085320  | 19 | 1  | 0 | 2.396331  | 5.233709  | -0.601793 |
| 42                                                     | 7      | 0      | -4.241538               | -0.582274 | 0.733343  | 20 | 6  | 0 | 0.426232  | 4.432497  | -0.270892 |
| 43                                                     | 1      | 0      | -4.365303               | -1.513765 | 0.338129  | 21 | 1  | 0 | -0.058486 | 5.400902  | -0.288546 |
| 44                                                     | 6      | 0      | -5.921427               | -0.220697 | -0.983074 | 22 | 6  | 0 | -0.326285 | 3.285210  | -0.076427 |
| 45                                                     | 8      | 0      | -5.601373               | -1.263958 | -1.495105 | 23 | 1  | 0 | -1.397186 | 3.332766  | 0.072758  |
| 46                                                     | 8      | 0      | -6.821286               | 0.627833  | -1.505992 | 24 | 16 | 0 | 2.996905  | -2.290359 | 0.084756  |
| 47                                                     | 1      | 0      | -1.941954               | -5.043005 | -0.529253 | 25 | 6  | 0 | 4.776652  | -2.022061 | -0.305074 |
| 48                                                     | 1      | 0      | -7.107179               | 0.269070  | -2.359722 | 26 | 1  | 0 | 4.936144  | -2.026165 | -1.388903 |
| 49                                                     | 1      | 0      | -4.122809               | -0.678644 | 1.746462  | 27 | 1  | 0 | 5.367398  | -2.830396 | 0.126773  |
| 50                                                     | 1      | 0      | 8.623589                | -0.136108 | 0.620062  | 28 | 6  | 0 | 5.252654  | -0.684882 | 0.272440  |
| 51                                                     | 1      | 0      | -1.671108               | -1.318376 | 1.610239  | 29 | 1  | 0 | 5.164585  | -0.722850 | 1.359860  |
| 52                                                     | 17     | 0      | -2.111578               | -1.273187 | 3.172038  | 30 | 6  | 0 | 6.697025  | -0.396475 | -0.110297 |
| -----                                                  |        |        |                         |           |           |    |    |   |           |           |           |
| HF=-2731.5004488\ZeroPoint=0.3588819\Thermal=0.3915532 |        |        |                         |           |           |    |    |   |           |           |           |
| G = -8.2 kcal mol <sup>-1</sup>                        |        |        |                         |           |           |    |    |   |           |           |           |
| -----                                                  |        |        |                         |           |           |    |    |   |           |           |           |
| Center                                                 | Atomic | Atomic | Coordinates (Angstroms) |           |           |    |    |   |           |           |           |
| Number                                                 | Number | Type   | X                       | Y         | Z         |    |    |   |           |           |           |
| -----                                                  |        |        |                         |           |           |    |    |   |           |           |           |
| 1                                                      | 46     | 0      | -2.470727               | 0.856310  | 0.227249  | 31 | 8  | 0 | 7.552275  | -1.202559 | 0.545541  |
| 2                                                      | 46     | 0      | 2.321657                | -0.006040 | -0.076401 | 32 | 8  | 0 | 7.040129  | 0.429989  | -0.920803 |
| 3                                                      | 7      | 0      | -0.404280               | 0.865539  | 0.114495  | 33 | 7  | 0 | 4.374054  | 0.408137  | -0.222579 |
| 4                                                      | 7      | 0      | 0.298232                | -0.202547 | 0.119476  | 34 | 1  | 0 | 4.581607  | 1.271035  | 0.274683  |
| 5                                                      | 6      | 0      | -0.378510               | -1.432269 | 0.373654  | 35 | 1  | 0 | 4.601959  | 0.593798  | -1.200244 |
| 6                                                      | 6      | 0      | -1.160182               | -1.576361 | 1.525434  | 36 | 16 | 0 | -2.669035 | -0.013346 | -1.931649 |
| 7                                                      | 6      | 0      | -1.833029               | -2.773736 | 1.735129  | 37 | 6  | 0 | -4.469429 | 0.339774  | -2.108248 |
| 8                                                      | 1      | 0      | -2.447285               | -2.890329 | 2.619300  | 38 | 1  | 0 | -4.635101 | 1.387716  | -2.373802 |
| 9                                                      | 6      | 0      | -1.726952               | -3.810731 | 0.808453  | 39 | 1  | 0 | -4.867806 | -0.284670 | -2.908492 |
| 10                                                     | 6      | 0      | -0.928710               | -3.660151 | -0.324939 | 40 | 6  | 0 | -5.187791 | 0.038513  | -0.798679 |
| 11                                                     | 1      | 0      | -0.839460               | -4.467241 | -1.042299 | 41 | 1  | 0 | -6.253228 | 0.300993  | -0.876452 |
| 12                                                     | 6      | 0      | -0.237842               | -2.473472 | -0.543094 | 42 | 7  | 0 | -4.551934 | 0.820539  | 0.296257  |
| 13                                                     | 1      | 0      | 0.385159                | -2.337842 | -1.415941 | 43 | 1  | 0 | -4.784223 | 0.429766  | 1.210295  |
| 14                                                     | 6      | 0      | 0.328895                | 2.045785  | -0.049437 | 44 | 6  | 0 | -5.149725 | -1.433781 | -0.396162 |
| 15                                                     | 6      | 0      | 1.731023                | 1.916073  | -0.195502 | 45 | 8  | 0 | -4.944127 | -1.822693 | 0.724919  |
| 16                                                     | 6      | 0      | 2.451473                | 3.092614  | -0.402703 | 46 | 8  | 0 | -5.454966 | -2.238902 | -1.427885 |
| 17                                                     | 1      | 0      | 3.528137                | 3.067036  | -0.545973 | 47 | 1  | 0 | -2.259469 | -4.740130 | 0.976229  |
|                                                        |        |        |                         |           |           | 48 | 1  | 0 | -5.410353 | -3.153232 | -1.110316 |
|                                                        |        |        |                         |           |           | 49 | 1  | 0 | -4.867278 | 1.787560  | 0.287028  |
|                                                        |        |        |                         |           |           | 50 | 1  | 0 | 8.449996  | -1.005703 | 0.236108  |
|                                                        |        |        |                         |           |           | 51 | 1  | 0 | -1.224385 | -0.770057 | 2.244774  |
|                                                        |        |        |                         |           |           | 52 | 17 | 0 | -2.516130 | 1.781034  | 2.427815  |
| -----                                                  |        |        |                         |           |           |    |    |   |           |           |           |
| HF=-2731.5550071\ZeroPoint=0.3636041\Thermal=0.3967983 |        |        |                         |           |           |    |    |   |           |           |           |

## Structures from Table S5

**Table S5. PATH I:** B3LYP-D3/6-311+G\*\*/SDD(Pd)/gas phase free energies for the pre- and postreaction complexes and the transition states for **the first D-transfer to the bridged complexes**. Free energies relative to **B1-1** (in kcal mol<sup>-1</sup>).

| D-source→               | Cys <sup>4D</sup> ·DCI | Cys <sup>4D</sup> ·DCI       | DCI   | Cys <sup>3D</sup> (bridge) <sup>a</sup> | Cys <sup>4D</sup> (coord)  | Cys <sup>4D</sup> (coord)    |
|-------------------------|------------------------|------------------------------|-------|-----------------------------------------|----------------------------|------------------------------|
| Donor group→            | COOD                   | ND <sub>3</sub> <sup>+</sup> | DCI   | COOD                                    | COOD                       | ND <sub>3</sub> <sup>+</sup> |
| <b>B1-1<sup>b</sup></b> |                        |                              |       | <b>B1-3<sup>b</sup></b>                 | <b>B1-CI-1<sup>b</sup></b> |                              |
| Prereaction complex     | <b>-21.4</b>           | -17.2                        | -6.1  | 24.9                                    | 15.9                       | 4.9                          |
| Transition state        | <b>-0.6</b>            | 2.7                          | 20.6  | 37.0                                    | 30.6                       | 15.3                         |
| Postreaction complex    | <b>-7.6</b>            | -16.0                        | -17.0 | 11.6                                    | 25.1                       | 10.9                         |
| <b>B1-2<sup>b</sup></b> |                        |                              |       | <b>B1-4<sup>b</sup></b>                 | <b>B1-CI-2<sup>b</sup></b> |                              |
| Prereaction complex     | <b>-15.8</b>           | -8.7                         | -0.6  | 33.5                                    | 6.8                        | 13.8                         |
| Transition state        | <b>-1.9</b>            | 2.3                          | 12.2  | 40.1                                    | 31.9                       | 25.5                         |
| Postreaction complex    | <b>-35.7</b>           | -28.8                        | -25.8 | 14.6                                    | 28.0                       | 21.8                         |

<sup>a</sup>Intramolecular D-transfer from the bridging COOD group. <sup>b</sup>Mother complex.

G = -21.4 kcal mol<sup>-1</sup>

| Center Number | Atomic Number | Atomic Type | Coordinates (Angstroms) |           |           |    |    |   |           |           |           |
|---------------|---------------|-------------|-------------------------|-----------|-----------|----|----|---|-----------|-----------|-----------|
|               |               |             | X                       | Y         | Z         |    |    |   |           |           |           |
| 1             | 46            | 0           | 1.604145                | 0.451709  | 1.623038  | 30 | 6  | 0 | -5.377831 | -0.687673 | -0.001512 |
| 2             | 46            | 0           | -1.398846               | 1.255985  | 0.114329  | 31 | 8  | 0 | -6.238589 | -0.843862 | -1.026189 |
| 3             | 7             | 0           | 2.019935                | 1.549545  | -0.053962 | 32 | 8  | 0 | -5.561430 | -1.138668 | 1.100197  |
| 4             | 7             | 0           | 3.066601                | 1.265039  | -0.706132 | 33 | 7  | 0 | -3.051094 | -0.094543 | 0.546202  |
| 5             | 6             | 0           | 3.749988                | 0.164136  | -0.206964 | 34 | 1  | 0 | -3.389339 | -0.080293 | 1.505263  |
| 6             | 6             | 0           | 3.262529                | -0.470659 | 0.964586  | 35 | 1  | 0 | -2.773907 | -1.067391 | 0.376952  |
| 7             | 6             | 0           | 3.943094                | -1.600450 | 1.406212  | 36 | 16 | 0 | -0.464860 | 1.519443  | 2.290417  |
| 8             | 1             | 0           | 3.616860                | -2.144207 | 2.287634  | 37 | 6  | 0 | -1.009827 | 0.219094  | 3.499193  |
| 9             | 6             | 0           | 5.056078                | -2.085865 | 0.706658  | 38 | 1  | 0 | -0.900317 | 0.678381  | 4.484571  |
| 10            | 6             | 0           | 5.513336                | -1.448809 | -0.449298 | 39 | 1  | 0 | -2.063173 | -0.019722 | 3.366075  |
| 11            | 1             | 0           | 6.366886                | -1.843811 | -0.986722 | 40 | 6  | 0 | -0.186445 | -1.075018 | 3.456387  |
| 12            | 6             | 0           | 4.859378                | -0.314016 | -0.913845 | 41 | 1  | 0 | -0.367370 | -1.626830 | 4.389609  |
| 13            | 1             | 0           | 5.166821                | 0.191450  | -1.820649 | 42 | 7  | 0 | 1.263564  | -0.774225 | 3.313126  |
| 14            | 6             | 0           | 1.299901                | 2.708367  | -0.475885 | 43 | 1  | 0 | 1.769353  | -1.646215 | 3.175948  |
| 15            | 6             | 0           | -0.107154               | 2.726697  | -0.448136 | 44 | 6  | 0 | -0.559272 | -2.044042 | 2.330670  |
| 16            | 6             | 0           | -0.718957               | 3.914888  | -0.886448 | 45 | 8  | 0 | 0.277912  | -2.557489 | 1.621194  |
| 17            | 1             | 0           | -1.799927               | 3.973138  | -0.914421 | 46 | 8  | 0 | -1.858553 | -2.267640 | 2.281119  |
| 18            | 6             | 0           | 0.017950                | 5.021650  | -1.297125 | 47 | 1  | 0 | 5.561919  | -2.976981 | 1.063187  |
| 19            | 1             | 0           | -0.498198               | 5.923491  | -1.608589 | 48 | 1  | 0 | -2.081879 | -2.810234 | 1.462652  |
| 20            | 6             | 0           | 1.413680                | 4.972452  | -1.311429 | 49 | 1  | 0 | 1.619647  | -0.324517 | 4.153285  |
| 21            | 1             | 0           | 1.994067                | 5.830444  | -1.629935 | 50 | 1  | 0 | -0.018240 | 0.782373  | -2.773361 |
| 22            | 6             | 0           | 2.053171                | 3.813300  | -0.910670 | 51 | 8  | 0 | 0.844619  | 0.612259  | -3.203935 |
| 23            | 1             | 0           | 3.133191                | 3.742504  | -0.912490 | 52 | 6  | 0 | 1.480245  | -0.478203 | -2.761894 |
| 24            | 16            | 0           | -2.239391               | 1.152713  | -2.107443 | 53 | 6  | 0 | 0.738517  | -1.352631 | -1.726586 |
| 25            | 6             | 0           | -3.707647               | 0.052279  | -1.815921 | 54 | 8  | 0 | 2.582193  | -0.756282 | -3.153873 |
| 26            | 1             | 0           | -3.473200               | -0.994876 | -2.017705 | 55 | 6  | 0 | 1.487477  | -2.637517 | -1.385861 |
| 27            | 1             | 0           | -4.494894               | 0.363426  | -2.499646 | 56 | 1  | 0 | 0.614711  | -0.758520 | -0.813312 |
| 28            | 6             | 0           | -4.178811               | 0.188489  | -0.369731 | 57 | 7  | 0 | -0.643078 | -1.663457 | -2.210278 |
| 29            | 1             | 0           | -4.501564               | 1.222163  | -0.202703 | 58 | 16 | 0 | 1.551578  | -3.862284 | -2.759221 |
|               |               |             |                         |           |           | 59 | 1  | 0 | 0.981798  | -3.132633 | -0.557605 |
|               |               |             |                         |           |           | 60 | 1  | 0 | 2.497150  | -2.386433 | -1.070269 |
|               |               |             |                         |           |           | 61 | 1  | 0 | -0.595635 | -2.229126 | -3.062761 |
|               |               |             |                         |           |           | 62 | 1  | 0 | -1.201437 | -2.232713 | -1.502782 |
|               |               |             |                         |           |           | 63 | 1  | 0 | 2.421978  | -3.166404 | -3.518043 |

|    |    |   |           |           |           |
|----|----|---|-----------|-----------|-----------|
| 64 | 17 | 0 | -2.562400 | -3.205279 | -0.445620 |
| 65 | 1  | 0 | -6.976912 | -1.387721 | -0.710609 |
| 66 | 1  | 0 | -1.185705 | -0.782743 | -2.372164 |

-----

HF=-3453.6882292\ZeroPoint=0.4614252\Thermal=0.5033511

G = -0.6 kcal mol<sup>-1</sup>

| Center Number | Atomic Number | Atomic Type | Coordinates (Angstroms) |           |           |
|---------------|---------------|-------------|-------------------------|-----------|-----------|
|               |               |             | X                       | Y         | Z         |
| 1             | 46            | 0           | 1.764491                | 0.285419  | 1.440156  |
| 2             | 46            | 0           | -1.413931               | 1.095076  | -0.071519 |
| 3             | 7             | 0           | 2.260852                | 1.607244  | -0.015530 |
| 4             | 7             | 0           | 3.410452                | 1.538514  | -0.533028 |
| 5             | 6             | 0           | 4.132216                | 0.433973  | -0.105927 |
| 6             | 6             | 0           | 3.550481                | -0.431096 | 0.859636  |
| 7             | 6             | 0           | 4.274492                | -1.557186 | 1.226797  |
| 8             | 1             | 0           | 3.882623                | -2.264290 | 1.952112  |
| 9             | 6             | 0           | 5.526409                | -1.819830 | 0.650086  |
| 10            | 6             | 0           | 6.079777                | -0.956911 | -0.296860 |
| 11            | 1             | 0           | 7.043637                | -1.179871 | -0.737962 |
| 12            | 6             | 0           | 5.380224                | 0.180899  | -0.682253 |
| 13            | 1             | 0           | 5.766500                | 0.862283  | -1.430284 |
| 14            | 6             | 0           | 1.446861                | 2.716535  | -0.409567 |
| 15            | 6             | 0           | 0.129150                | 2.478713  | -0.874480 |
| 16            | 6             | 0           | -0.556211               | 3.609196  | -1.368225 |
| 17            | 1             | 0           | -1.535225               | 3.476910  | -1.809164 |
| 18            | 6             | 0           | -0.011908               | 4.890233  | -1.313741 |
| 19            | 1             | 0           | -0.586719               | 5.734869  | -1.676288 |
| 20            | 6             | 0           | 1.272356                | 5.081165  | -0.811209 |
| 21            | 1             | 0           | 1.705406                | 6.074227  | -0.771355 |
| 22            | 6             | 0           | 2.016568                | 3.985856  | -0.382993 |
| 23            | 1             | 0           | 3.034250                | 4.102831  | -0.032498 |
| 24            | 16            | 0           | -2.614800               | 1.040287  | -2.120982 |
| 25            | 6             | 0           | -4.195156               | 0.281991  | -1.534304 |
| 26            | 1             | 0           | -4.200199               | -0.787785 | -1.748051 |
| 27            | 1             | 0           | -5.021736               | 0.754526  | -2.062246 |
| 28            | 6             | 0           | -4.330808               | 0.503408  | -0.031933 |
| 29            | 1             | 0           | -4.439698               | 1.575268  | 0.164107  |
| 30            | 6             | 0           | -5.531382               | -0.176159 | 0.623468  |
| 31            | 8             | 0           | -6.633680               | -0.112945 | -0.145603 |
| 32            | 8             | 0           | -5.507233               | -0.664342 | 1.725108  |
| 33            | 7             | 0           | -3.084296               | 0.033878  | 0.621758  |
| 34            | 1             | 0           | -3.205795               | 0.028615  | 1.631356  |
| 35            | 1             | 0           | -2.957919               | -0.952792 | 0.349818  |
| 36            | 16            | 0           | -0.329972               | 1.300876  | 2.066457  |
| 37            | 6             | 0           | -0.810550               | 0.042412  | 3.341243  |
| 38            | 1             | 0           | -0.560103               | 0.506811  | 4.298000  |
| 39            | 1             | 0           | -1.884734               | -0.135578 | 3.340302  |
| 40            | 6             | 0           | -0.077524               | -1.298129 | 3.225616  |
| 41            | 1             | 0           | -0.233076               | -1.852862 | 4.161562  |
| 42            | 7             | 0           | 1.379118                | -1.104639 | 2.986082  |
| 43            | 1             | 0           | 1.775240                | -1.996575 | 2.693406  |
| 44            | 6             | 0           | -0.597350               | -2.215617 | 2.115160  |
| 45            | 8             | 0           | 0.155116                | -2.805986 | 1.370882  |
| 46            | 8             | 0           | -1.911465               | -2.295484 | 2.116724  |
| 47            | 1             | 0           | 6.068591                | -2.713595 | 0.940904  |

|    |    |   |           |           |           |
|----|----|---|-----------|-----------|-----------|
| 48 | 1  | 0 | -2.242437 | -2.782895 | 1.293994  |
| 49 | 1  | 0 | 1.848807  | -0.806792 | 3.837525  |
| 50 | 1  | 0 | 0.194895  | 1.363551  | -1.614182 |
| 51 | 8  | 0 | 0.681627  | 0.564510  | -2.556123 |
| 52 | 6  | 0 | 1.328752  | -0.511664 | -2.251516 |
| 53 | 6  | 0 | 0.450690  | -1.628998 | -1.630527 |
| 54 | 8  | 0 | 2.525595  | -0.716646 | -2.393215 |
| 55 | 6  | 0 | 1.116545  | -2.994966 | -1.548759 |
| 56 | 1  | 0 | 0.202924  | -1.302058 | -0.615953 |
| 57 | 7  | 0 | -0.851186 | -1.716285 | -2.364730 |
| 58 | 16 | 0 | 1.444432  | -3.755539 | -3.195312 |
| 59 | 1  | 0 | 0.478545  | -3.692289 | -1.006027 |
| 60 | 1  | 0 | 2.053927  | -2.888225 | -1.007797 |
| 61 | 1  | 0 | -0.697724 | -2.175015 | -3.267905 |
| 62 | 1  | 0 | -1.553655 | -2.266585 | -1.811390 |
| 63 | 1  | 0 | 2.357845  | -2.835487 | -3.569902 |
| 64 | 17 | 0 | -2.978874 | -3.020978 | -0.522859 |
| 65 | 1  | 0 | -7.358375 | -0.539562 | 0.337500  |
| 66 | 1  | 0 | -1.261284 | -0.770570 | -2.513212 |

-----

HF=-3453.6525867\ZeroPoint=0.457378\Thermal=0.4987135

G = -7.6 kcal mol<sup>-1</sup>

| Center Number | Atomic Number | Atomic Type | Coordinates (Angstroms) |           |           |
|---------------|---------------|-------------|-------------------------|-----------|-----------|
|               |               |             | X                       | Y         | Z         |
| 1             | 46            | 0           | -1.849762               | -0.699349 | 1.239202  |
| 2             | 46            | 0           | 1.474842                | -1.078826 | -0.391501 |
| 3             | 7             | 0           | -2.286018               | -1.707882 | -0.449974 |
| 4             | 7             | 0           | -3.388175               | -1.544181 | -1.029314 |
| 5             | 6             | 0           | -4.175598               | -0.594002 | -0.389033 |
| 6             | 6             | 0           | -3.673564               | 0.021015  | 0.791675  |
| 7             | 6             | 0           | -4.467000               | 0.981904  | 1.399153  |
| 8             | 1             | 0           | -4.138131               | 1.491909  | 2.299860  |
| 9             | 6             | 0           | -5.709252               | 1.331482  | 0.847076  |
| 10            | 6             | 0           | -6.180428               | 0.721164  | -0.315231 |
| 11            | 1             | 0           | -7.136295               | 1.012512  | -0.733154 |
| 12            | 6             | 0           | -5.409910               | -0.251759 | -0.942720 |
| 13            | 1             | 0           | -5.731386               | -0.730979 | -1.859172 |
| 14            | 6             | 0           | -1.345484               | -2.667388 | -0.954867 |
| 15            | 6             | 0           | -0.284017               | -2.219766 | -1.769356 |
| 16            | 6             | 0           | 0.704147                | -3.154102 | -2.128491 |
| 17            | 1             | 0           | 1.484121                | -2.860030 | -2.817543 |
| 18            | 6             | 0           | 0.654185                | -4.470476 | -1.653466 |
| 19            | 1             | 0           | 1.431692                | -5.172917 | -1.928283 |
| 20            | 6             | 0           | -0.404961               | -4.874529 | -0.854143 |
| 21            | 1             | 0           | -0.456965               | -5.895697 | -0.494023 |
| 22            | 6             | 0           | -1.413628               | -3.969832 | -0.497466 |
| 23            | 1             | 0           | -2.229886               | -4.270450 | 0.147625  |
| 24            | 16            | 0           | 2.676384                | -0.462178 | -2.324332 |
| 25            | 6             | 0           | 4.234568                | 0.163658  | -1.549151 |
| 26            | 1             | 0           | 4.226117                | 1.253731  | -1.528703 |
| 27            | 1             | 0           | 5.082165                | -0.177396 | -2.141302 |
| 28            | 6             | 0           | 4.331922                | -0.375235 | -0.127913 |
| 29            | 1             | 0           | 4.489745                | -1.457890 | -0.161409 |
| 30            | 6             | 0           | 5.460921                | 0.195903  | 0.728980  |
| 31            | 8             | 0           | 6.573636                | 0.433471  | 0.014483  |

|    |    |   |           |           |           |    |    |   |           |           |           |
|----|----|---|-----------|-----------|-----------|----|----|---|-----------|-----------|-----------|
| 32 | 8  | 0 | 5.374252  | 0.357541  | 1.920179  | 16 | 6  | 0 | 4.010696  | -1.881715 | -0.787789 |
| 33 | 7  | 0 | 3.036748  | -0.114569 | 0.554956  | 17 | 1  | 0 | 4.759116  | -1.366890 | -0.193149 |
| 34 | 1  | 0 | 3.117382  | -0.325983 | 1.547001  | 18 | 6  | 0 | 4.436943  | -2.808340 | -1.737147 |
| 35 | 1  | 0 | 2.870835  | 0.905277  | 0.494890  | 19 | 1  | 0 | 5.496570  | -3.006662 | -1.859792 |
| 36 | 16 | 0 | 0.308852  | -1.737617 | 1.627872  | 20 | 6  | 0 | 3.503442  | -3.488457 | -2.524225 |
| 37 | 6  | 0 | 0.711054  | -0.812630 | 3.181544  | 21 | 1  | 0 | 3.828458  | -4.214519 | -3.260214 |
| 38 | 1  | 0 | 0.433881  | -1.497390 | 3.986307  | 22 | 6  | 0 | 2.152834  | -3.237404 | -2.347559 |
| 39 | 1  | 0 | 1.780332  | -0.626666 | 3.270372  | 23 | 1  | 0 | 1.407339  | -3.756500 | -2.936802 |
| 40 | 6  | 0 | -0.045846 | 0.508316  | 3.362792  | 24 | 16 | 0 | 1.753906  | 1.945541  | 1.939748  |
| 41 | 1  | 0 | 0.064705  | 0.815428  | 4.412348  | 25 | 6  | 0 | 2.960061  | 2.975828  | 1.007774  |
| 42 | 7  | 0 | -1.492066 | 0.381389  | 3.026262  | 26 | 1  | 0 | 3.970836  | 2.740905  | 1.352421  |
| 43 | 1  | 0 | -1.860406 | 1.321894  | 2.881917  | 27 | 1  | 0 | 2.763452  | 4.029122  | 1.211174  |
| 44 | 6  | 0 | 0.504586  | 1.679944  | 2.543398  | 28 | 6  | 0 | 2.847588  | 2.715166  | -0.499964 |
| 45 | 8  | 0 | -0.228871 | 2.466440  | 1.986299  | 29 | 1  | 0 | 1.867729  | 3.046767  | -0.841852 |
| 46 | 8  | 0 | 1.820568  | 1.727570  | 2.572323  | 30 | 6  | 0 | 3.919244  | 3.488714  | -1.251877 |
| 47 | 1  | 0 | -6.308681 | 2.096021  | 1.330378  | 31 | 8  | 0 | 3.658462  | 4.810762  | -1.262796 |
| 48 | 1  | 0 | 2.176581  | 2.410094  | 1.916080  | 32 | 8  | 0 | 4.904338  | 2.999504  | -1.749806 |
| 49 | 1  | 0 | -2.004755 | -0.052144 | 3.789716  | 33 | 7  | 0 | 2.960722  | 1.267288  | -0.803476 |
| 50 | 1  | 0 | -0.365010 | -1.243029 | -2.261962 | 34 | 1  | 0 | 2.413448  | 1.065690  | -1.637911 |
| 51 | 8  | 0 | -0.670579 | 0.524174  | -2.908539 | 35 | 1  | 0 | 3.930900  | 1.036639  | -1.016921 |
| 52 | 6  | 0 | -1.351266 | 1.223619  | -2.113990 | 36 | 16 | 0 | 1.240777  | -1.639486 | 2.117349  |
| 53 | 6  | 0 | -0.490049 | 2.161658  | -1.204710 | 37 | 6  | 0 | 0.227136  | -0.826846 | 3.460770  |
| 54 | 8  | 0 | -2.572654 | 1.245131  | -1.909761 | 38 | 1  | 0 | 0.560157  | -1.289976 | 4.390626  |
| 55 | 6  | 0 | -1.176939 | 3.446860  | -0.776589 | 39 | 1  | 0 | 0.465724  | 0.232613  | 3.514569  |
| 56 | 1  | 0 | -0.236032 | 1.586550  | -0.310648 | 40 | 6  | 0 | -1.295745 | -1.020201 | 3.310837  |
| 57 | 7  | 0 | 0.801909  | 2.433207  | -1.912074 | 41 | 1  | 0 | -1.722300 | -1.140388 | 4.316615  |
| 58 | 16 | 0 | -1.594840 | 4.543950  | -2.198928 | 42 | 7  | 0 | -1.619952 | -2.223064 | 2.490190  |
| 59 | 1  | 0 | -0.543113 | 4.029320  | -0.107360 | 43 | 1  | 0 | -2.627613 | -2.252672 | 2.352051  |
| 60 | 1  | 0 | -2.091269 | 3.179622  | -0.252679 | 44 | 6  | 0 | -2.107164 | 0.131732  | 2.694528  |
| 61 | 1  | 0 | 0.645790  | 3.168686  | -2.608569 | 45 | 8  | 0 | -3.072843 | -0.127234 | 1.994051  |
| 62 | 1  | 0 | 1.559573  | 2.720113  | -1.255274 | 46 | 8  | 0 | -1.709478 | 1.323354  | 3.044243  |
| 63 | 1  | 0 | -2.462288 | 3.674470  | -2.760513 | 47 | 1  | 0 | -5.530168 | -2.131400 | -1.272071 |
| 64 | 17 | 0 | 2.998289  | 3.067811  | 0.239324  | 48 | 1  | 0 | -2.267045 | 2.032910  | 2.583400  |
| 65 | 1  | 0 | 7.249983  | 0.775617  | 0.619746  | 49 | 1  | 0 | -1.330857 | -3.071968 | 2.970047  |
| 66 | 1  | 0 | 1.062147  | 1.560954  | -2.406012 | 50 | 1  | 0 | 0.132315  | 1.658249  | 0.702066  |
|    |    |   |           |           |           | 51 | 8  | 0 | -0.770656 | 1.450505  | 0.278274  |
|    |    |   |           |           |           | 52 | 6  | 0 | -0.801000 | 1.531795  | -1.030686 |
|    |    |   |           |           |           | 53 | 6  | 0 | -2.232519 | 1.526291  | -1.567025 |
|    |    |   |           |           |           | 54 | 8  | 0 | 0.142375  | 1.665784  | -1.782744 |
|    |    |   |           |           |           | 55 | 6  | 0 | -2.564849 | 2.963950  | -2.019117 |
|    |    |   |           |           |           | 56 | 1  | 0 | -2.292302 | 0.829174  | -2.403103 |
|    |    |   |           |           |           | 57 | 7  | 0 | -3.192773 | 1.089077  | -0.517664 |
|    |    |   |           |           |           | 58 | 16 | 0 | -4.342005 | 3.229529  | -2.412428 |
|    |    |   |           |           |           | 59 | 1  | 0 | -1.986129 | 3.186909  | -2.913665 |
|    |    |   |           |           |           | 60 | 1  | 0 | -2.294328 | 3.670260  | -1.234133 |
|    |    |   |           |           |           | 61 | 1  | 0 | -3.284483 | 1.846765  | 0.250218  |
|    |    |   |           |           |           | 62 | 1  | 0 | -4.116450 | 0.951619  | -0.929637 |
|    |    |   |           |           |           | 63 | 1  | 0 | -4.689176 | 3.589037  | -1.154959 |
|    |    |   |           |           |           | 64 | 17 | 0 | -3.379417 | 3.314553  | 1.460673  |
|    |    |   |           |           |           | 65 | 1  | 0 | 4.391749  | 5.257120  | -1.713524 |
|    |    |   |           |           |           | 66 | 1  | 0 | -2.911631 | 0.225922  | -0.046167 |

HF=-3453.6636542\ZeroPoint=0.4608244\Thermal=0.5032794

G = -15.8 kcal mol<sup>-1</sup>

| Center<br>Number | Atomic<br>Number | Atomic<br>Type | Coordinates (Angstroms) |           |           |
|------------------|------------------|----------------|-------------------------|-----------|-----------|
|                  |                  |                | X                       | Y         | Z         |
| 1                | 46               | 0              | -0.609803               | -2.122302 | 0.637053  |
| 2                | 46               | 0              | 2.175845                | -0.060604 | 0.677702  |
| 3                | 7                | 0              | 0.332807                | -2.122290 | -1.191847 |
| 4                | 7                | 0              | -0.380163               | -2.139682 | -2.235035 |
| 5                | 6                | 0              | -1.747928               | -2.125419 | -1.968476 |
| 6                | 6                | 0              | -2.184698               | -2.215357 | -0.620194 |
| 7                | 6                | 0              | -3.562310               | -2.224207 | -0.402429 |
| 8                | 1                | 0              | -3.961905               | -2.268675 | 0.604527  |
| 9                | 6                | 0              | -4.463529               | -2.126888 | -1.471650 |
| 10               | 6                | 0              | -4.007410               | -2.021740 | -2.788259 |
| 11               | 1                | 0              | -4.714280               | -1.943550 | -3.605583 |
| 12               | 6                | 0              | -2.639540               | -2.031134 | -3.043684 |
| 13               | 1                | 0              | -2.250101               | -1.965947 | -4.053133 |
| 14               | 6                | 0              | 1.738039                | -2.312817 | -1.372636 |
| 15               | 6                | 0              | 2.650408                | -1.608673 | -0.568682 |

HF=-3453.679164\ZeroPoint=0.4610797\Thermal=0.5028416

G = -1.9 kcal mol<sup>-1</sup>

| Center<br>Number | Atomic<br>Number | Atomic<br>Type | Coordinates (Angstroms) |   |   |
|------------------|------------------|----------------|-------------------------|---|---|
|                  |                  |                | X                       | Y | Z |

|    |    |   |           |           |           |
|----|----|---|-----------|-----------|-----------|
| 1  | 46 | 0 | -2.454638 | -0.310899 | 0.831046  |
| 2  | 46 | 0 | 0.969223  | -1.649662 | 0.404715  |
| 3  | 7  | 0 | -2.527328 | -1.020078 | -1.079964 |
| 4  | 7  | 0 | -3.358525 | -0.505290 | -1.879008 |
| 5  | 6  | 0 | -4.074601 | 0.553325  | -1.328790 |
| 6  | 6  | 0 | -3.811244 | 0.931382  | 0.013329  |
| 7  | 6  | 0 | -4.517919 | 2.020570  | 0.513600  |
| 8  | 1  | 0 | -4.364376 | 2.366611  | 1.531877  |
| 9  | 6  | 0 | -5.447775 | 2.703492  | -0.283171 |
| 10 | 6  | 0 | -5.692762 | 2.309938  | -1.600207 |
| 11 | 1  | 0 | -6.415277 | 2.846195  | -2.203596 |
| 12 | 6  | 0 | -5.001615 | 1.226539  | -2.132396 |
| 13 | 1  | 0 | -5.162411 | 0.895043  | -3.151613 |
| 14 | 6  | 0 | -1.744902 | -2.098647 | -1.616294 |
| 15 | 6  | 0 | -0.342327 | -2.079913 | -1.454803 |
| 16 | 6  | 0 | 0.346882  | -3.070582 | -2.180957 |
| 17 | 1  | 0 | 1.429327  | -3.084384 | -2.181820 |
| 18 | 6  | 0 | -0.301541 | -4.060747 | -2.915852 |
| 19 | 1  | 0 | 0.279282  | -4.819800 | -3.428149 |
| 20 | 6  | 0 | -1.693193 | -4.074587 | -2.990340 |
| 21 | 1  | 0 | -2.208672 | -4.846668 | -3.549785 |
| 22 | 6  | 0 | -2.417688 | -3.070387 | -2.362560 |
| 23 | 1  | 0 | -3.496498 | -3.025797 | -2.444130 |
| 24 | 16 | 0 | 2.438368  | -1.620042 | 2.210067  |
| 25 | 6  | 0 | 4.036662  | -1.392273 | 1.319090  |
| 26 | 1  | 0 | 4.515629  | -2.363583 | 1.159022  |
| 27 | 1  | 0 | 4.688014  | -0.778531 | 1.941735  |
| 28 | 6  | 0 | 3.800354  | -0.700068 | -0.023967 |
| 29 | 1  | 0 | 3.463758  | 0.323109  | 0.156536  |
| 30 | 6  | 0 | 5.081684  | -0.678838 | -0.843839 |
| 31 | 8  | 0 | 5.948146  | 0.244851  | -0.388104 |
| 32 | 8  | 0 | 5.316925  | -1.419879 | -1.767766 |
| 33 | 7  | 0 | 2.743715  | -1.432636 | -0.761537 |
| 34 | 1  | 0 | 2.534498  | -0.940483 | -1.637669 |
| 35 | 1  | 0 | 3.108098  | -2.350025 | -1.014845 |
| 36 | 16 | 0 | -0.917028 | -1.906893 | 1.775450  |
| 37 | 6  | 0 | -0.678398 | -1.061957 | 3.411744  |
| 38 | 1  | 0 | -1.270213 | -1.633692 | 4.130587  |
| 39 | 1  | 0 | 0.368419  | -1.117326 | 3.706870  |
| 40 | 6  | 0 | -1.139853 | 0.398186  | 3.422871  |
| 41 | 1  | 0 | -1.196828 | 0.732734  | 4.467757  |
| 42 | 7  | 0 | -2.472758 | 0.527630  | 2.770214  |
| 43 | 1  | 0 | -2.701916 | 1.514008  | 2.673433  |
| 44 | 6  | 0 | -0.188874 | 1.374046  | 2.720112  |
| 45 | 8  | 0 | -0.590305 | 2.137558  | 1.857495  |
| 46 | 8  | 0 | 1.025493  | 1.304174  | 3.190673  |
| 47 | 1  | 0 | -5.984952 | 3.550445  | 0.131060  |
| 48 | 1  | 0 | 1.669712  | 1.823670  | 2.612491  |
| 49 | 1  | 0 | -3.191143 | 0.084957  | 3.338452  |
| 50 | 1  | 0 | 0.010689  | -0.663690 | -1.410161 |
| 51 | 8  | 0 | -0.036161 | 0.542386  | -1.540950 |
| 52 | 6  | 0 | 0.991826  | 1.106311  | -2.081962 |
| 53 | 6  | 0 | 0.949874  | 2.644733  | -1.944947 |
| 54 | 8  | 0 | 1.933428  | 0.560516  | -2.641479 |
| 55 | 6  | 0 | 2.315750  | 3.286644  | -2.189126 |
| 56 | 1  | 0 | 0.213663  | 3.020997  | -2.660394 |
| 57 | 7  | 0 | 0.436167  | 2.962361  | -0.575711 |

|    |    |   |           |          |           |
|----|----|---|-----------|----------|-----------|
| 58 | 16 | 0 | 2.374824  | 5.081317 | -1.774935 |
| 59 | 1  | 0 | 2.565063  | 3.181941 | -3.243288 |
| 60 | 1  | 0 | 3.081970  | 2.778304 | -1.607837 |
| 61 | 1  | 0 | 1.211095  | 2.816486 | 0.148166  |
| 62 | 1  | 0 | 0.153242  | 3.939948 | -0.503640 |
| 63 | 1  | 0 | 2.745183  | 4.893282 | -0.487116 |
| 64 | 17 | 0 | 2.834121  | 2.667779 | 1.225885  |
| 65 | 1  | 0 | 6.754423  | 0.186613 | -0.923182 |
| 66 | 1  | 0 | -0.340528 | 2.349316 | -0.311219 |

HF=-3453.6538078\ZeroPoint=0.4578468\Thermal=0.4993109

G = -35.7 kcal mol<sup>-1</sup>

| Center Number | Atomic Number | Atomic Type | Coordinates (Angstroms) |           |           |
|---------------|---------------|-------------|-------------------------|-----------|-----------|
|               |               |             | X                       | Y         | Z         |
| 1             | 46            | 0           | -2.005699               | -0.907451 | 0.970448  |
| 2             | 46            | 0           | 1.636553                | -0.841728 | 0.304126  |
| 3             | 7             | 0           | -2.436416               | -1.433804 | -0.985893 |
| 4             | 7             | 0           | -3.380514               | -0.838360 | -1.574367 |
| 5             | 6             | 0           | -3.920466               | 0.204043  | -0.825167 |
| 6             | 6             | 0           | -3.469970               | 0.391478  | 0.507441  |
| 7             | 6             | 0           | -3.977354               | 1.492586  | 1.194654  |
| 8             | 1             | 0           | -3.649809               | 1.721039  | 2.203912  |
| 9             | 6             | 0           | -4.905680               | 2.353309  | 0.591974  |
| 10            | 6             | 0           | -5.348912               | 2.134522  | -0.714058 |
| 11            | 1             | 0           | -6.067464               | 2.807347  | -1.166184 |
| 12            | 6             | 0           | -4.855088               | 1.050635  | -1.432106 |
| 13            | 1             | 0           | -5.164934               | 0.855393  | -2.452102 |
| 14            | 6             | 0           | -1.891256               | -2.563214 | -1.675420 |
| 15            | 6             | 0           | -0.513293               | -2.639940 | -1.867010 |
| 16            | 6             | 0           | 0.018638                | -3.748797 | -2.515514 |
| 17            | 1             | 0           | 1.089468                | -3.808429 | -2.668407 |
| 18            | 6             | 0           | -0.818105               | -4.772747 | -2.958950 |
| 19            | 1             | 0           | -0.396975               | -5.641516 | -3.451763 |
| 20            | 6             | 0           | -2.197987               | -4.681364 | -2.768603 |
| 21            | 1             | 0           | -2.849387               | -5.476744 | -3.111895 |
| 22            | 6             | 0           | -2.743540               | -3.571868 | -2.131515 |
| 23            | 1             | 0           | -3.810313               | -3.484373 | -1.967512 |
| 24            | 16            | 0           | 3.372557                | -2.261944 | 0.825944  |
| 25            | 6             | 0           | 4.652235                | -1.443539 | -0.228103 |
| 26            | 1             | 0           | 4.577949                | -1.811326 | -1.255819 |
| 27            | 1             | 0           | 5.636284                | -1.706286 | 0.163088  |
| 28            | 6             | 0           | 4.460050                | 0.076168  | -0.215192 |
| 29            | 1             | 0           | 4.613773                | 0.448080  | 0.799058  |
| 30            | 6             | 0           | 5.454365                | 0.749139  | -1.150378 |
| 31            | 8             | 0           | 6.687323                | 0.803555  | -0.602205 |
| 32            | 8             | 0           | 5.198970                | 1.150675  | -2.257700 |
| 33            | 7             | 0           | 3.073983                | 0.398848  | -0.613578 |
| 34            | 1             | 0           | 2.840825                | 1.361043  | -0.336399 |
| 35            | 1             | 0           | 2.956828                | 0.341809  | -1.626279 |
| 36            | 16            | 0           | 0.041190                | -2.176973 | 1.454872  |
| 37            | 6             | 0           | 0.286512                | -1.558608 | 3.188330  |
| 38            | 1             | 0           | -0.048601               | -2.353698 | 3.860019  |
| 39            | 1             | 0           | 1.351235                | -1.399125 | 3.349586  |
| 40            | 6             | 0           | -0.495750               | -0.285167 | 3.500823  |
| 41            | 1             | 0           | -0.484422               | -0.127624 | 4.589677  |

|    |    |   |           |           |           |    |    |   |           |           |           |
|----|----|---|-----------|-----------|-----------|----|----|---|-----------|-----------|-----------|
| 42 | 7  | 0 | -1.902752 | -0.431758 | 3.030368  | 26 | 1  | 0 | 4.551065  | -0.032991 | 2.695377  |
| 43 | 1  | 0 | -2.399368 | 0.437706  | 3.207971  | 27 | 1  | 0 | 5.148980  | 0.843973  | 1.276095  |
| 44 | 6  | 0 | 0.017619  | 1.031705  | 2.900294  | 28 | 6  | 0 | 3.902098  | -0.846432 | 0.814086  |
| 45 | 8  | 0 | -0.777994 | 1.907209  | 2.599126  | 29 | 1  | 0 | 4.762492  | -1.520513 | 0.698900  |
| 46 | 8  | 0 | 1.317602  | 1.108970  | 2.815634  | 30 | 6  | 0 | 2.775496  | -1.675399 | 1.425784  |
| 47 | 1  | 0 | -5.284889 | 3.202502  | 1.151057  | 31 | 8  | 0 | 1.755548  | -1.943584 | 0.804056  |
| 48 | 1  | 0 | 1.602708  | 1.912570  | 2.272138  | 32 | 8  | 0 | 3.027294  | -2.069246 | 2.641697  |
| 49 | 1  | 0 | -2.369573 | -1.174715 | 3.545746  | 33 | 7  | 0 | 3.462446  | -0.333647 | -0.515097 |
| 50 | 1  | 0 | 0.124326  | -1.825655 | -1.547504 | 34 | 1  | 0 | 4.273354  | 0.073265  | -0.977480 |
| 51 | 8  | 0 | 0.159403  | 0.660761  | -0.142455 | 35 | 1  | 0 | 3.172615  | -1.123546 | -1.091431 |
| 52 | 6  | 0 | 0.091758  | 1.155829  | -1.319291 | 36 | 16 | 0 | 0.674170  | 1.166460  | -2.385692 |
| 53 | 6  | 0 | -0.691384 | 2.492097  | -1.361720 | 37 | 6  | 0 | 1.377760  | -0.306223 | -3.260284 |
| 54 | 8  | 0 | 0.564857  | 0.719039  | -2.363124 | 38 | 1  | 0 | 1.282812  | -0.132504 | -4.333225 |
| 55 | 6  | 0 | 0.007189  | 3.497116  | -2.276262 | 39 | 1  | 0 | 2.438467  | -0.358372 | -3.023409 |
| 56 | 1  | 0 | -1.708823 | 2.292000  | -1.707818 | 40 | 6  | 0 | 0.667617  | -1.612898 | -2.890100 |
| 57 | 7  | 0 | -0.787427 | 3.032509  | 0.028165  | 41 | 1  | 0 | -0.231599 | -1.728085 | -3.494085 |
| 58 | 16 | 0 | -0.812945 | 5.154295  | -2.316301 | 42 | 7  | 0 | 0.256353  | -1.663100 | -1.464706 |
| 59 | 1  | 0 | 0.005034  | 3.097521  | -3.287516 | 43 | 1  | 0 | 1.039058  | -1.883478 | -0.834158 |
| 60 | 1  | 0 | 1.044056  | 3.630385  | -1.967752 | 44 | 6  | 0 | 1.635101  | -2.767574 | -3.151662 |
| 61 | 1  | 0 | 0.190708  | 3.222137  | 0.392259  | 45 | 8  | 0 | 2.651793  | -2.918928 | -2.516407 |
| 62 | 1  | 0 | -1.336370 | 3.893471  | 0.047547  | 46 | 8  | 0 | 1.248418  | -3.564359 | -4.156829 |
| 63 | 1  | 0 | 0.019782  | 5.761497  | -1.446544 | 47 | 1  | 0 | -6.358524 | -1.171056 | -1.671292 |
| 64 | 17 | 0 | 2.156144  | 3.247863  | 0.862806  | 48 | 1  | 0 | 1.908790  | -4.268452 | -4.262763 |
| 65 | 1  | 0 | 7.282175  | 1.208318  | -1.251904 | 49 | 1  | 0 | -0.450505 | -2.394684 | -1.344314 |
| 66 | 1  | 0 | -1.177684 | 2.345177  | 0.680561  | 50 | 1  | 0 | -0.237791 | -3.803754 | 1.972612  |

HF=-3453.7058453\ZeroPoint=0.4610044\Thermal=0.5036036

G = -17.2 kcal mol<sup>-1</sup>

| Center Number | Atomic Number | Atomic Type | Coordinates (Angstroms) |           |           |
|---------------|---------------|-------------|-------------------------|-----------|-----------|
|               |               |             | X                       | Y         | Z         |
| 1             | 46            | 0           | -0.528608               | 0.107917  | -0.682407 |
| 2             | 46            | 0           | 2.004905                | 1.351591  | -0.276692 |
| 3             | 7             | 0           | -1.357700               | 1.954844  | -0.142289 |
| 4             | 7             | 0           | -2.591604               | 2.184394  | -0.144253 |
| 5             | 6             | 0           | -3.530700               | 1.251475  | -0.600489 |
| 6             | 6             | 0           | -3.340281               | 0.387891  | -1.692569 |
| 7             | 6             | 0           | -4.361481               | -0.475753 | -2.070659 |
| 8             | 1             | 0           | -4.209800               | -1.146987 | -2.907361 |
| 9             | 6             | 0           | -5.573335               | -0.483711 | -1.379285 |
| 10            | 6             | 0           | -5.781535               | 0.410207  | -0.327233 |
| 11            | 1             | 0           | -6.726412               | 0.419334  | 0.202470  |
| 12            | 6             | 0           | -4.777028               | 1.294571  | 0.043595  |
| 13            | 1             | 0           | -4.920789               | 1.999249  | 0.852421  |
| 14            | 6             | 0           | -0.524037               | 3.076637  | 0.205476  |
| 15            | 6             | 0           | 0.884680                | 2.974909  | 0.153769  |
| 16            | 6             | 0           | 1.607403                | 4.156436  | 0.420092  |
| 17            | 1             | 0           | 2.688088                | 4.121254  | 0.400865  |
| 18            | 6             | 0           | 0.984482                | 5.353649  | 0.737704  |
| 19            | 1             | 0           | 1.584244                | 6.234607  | 0.940108  |
| 20            | 6             | 0           | -0.412161               | 5.420209  | 0.814688  |
| 21            | 1             | 0           | -0.907524               | 6.347236  | 1.078614  |
| 22            | 6             | 0           | -1.158431               | 4.293662  | 0.545534  |
| 23            | 1             | 0           | -2.237423               | 4.329243  | 0.583911  |
| 24            | 16            | 0           | 2.866354                | 1.498984  | 1.891633  |
| 25            | 6             | 0           | 4.281580                | 0.332025  | 1.704006  |

|    |    |   |           |           |           |
|----|----|---|-----------|-----------|-----------|
| 51 | 1  | 0 | -2.419477 | 0.426544  | -2.259031 |
| 52 | 7  | 0 | -0.934677 | -0.755378 | 1.285087  |
| 53 | 6  | 0 | -1.799571 | -1.915651 | 1.648787  |
| 54 | 1  | 0 | 0.023264  | -0.985700 | 1.562673  |
| 55 | 1  | 0 | -1.223449 | 0.022357  | 1.880815  |
| 56 | 6  | 0 | -3.278915 | -1.554503 | 1.605966  |
| 57 | 1  | 0 | -1.521209 | -2.224759 | 2.659359  |
| 58 | 6  | 0 | -1.500539 | -3.067702 | 0.676173  |
| 59 | 16 | 0 | -3.707429 | -0.204110 | 2.781920  |
| 60 | 1  | 0 | -3.878858 | -2.435185 | 1.834297  |
| 61 | 1  | 0 | -3.561987 | -1.203778 | 0.615835  |
| 62 | 8  | 0 | -1.996877 | -3.079004 | -0.439549 |
| 63 | 8  | 0 | -0.662105 | -3.993835 | 1.068464  |
| 64 | 1  | 0 | -3.320368 | -0.853928 | 3.900673  |
| 65 | 1  | 0 | 2.215145  | -2.552210 | 3.028892  |
| 66 | 17 | 0 | 0.551333  | -3.302876 | 3.684967  |

HF=-3453.6788411\ZeroPoint=0.4615827\Thermal=0.5034194

G = 2.7 kcal mol<sup>-1</sup>

| Center Number | Atomic Number | Atomic Type | Coordinates (Angstroms) |           |           |
|---------------|---------------|-------------|-------------------------|-----------|-----------|
|               |               |             | X                       | Y         | Z         |
| 1             | 46            | 0           | 0.875911                | -0.832465 | 1.099563  |
| 2             | 46            | 0           | 1.743914                | 1.514640  | -0.455621 |
| 3             | 7             | 0           | 2.065144                | -1.811657 | -0.249596 |
| 4             | 7             | 0           | 1.840599                | -3.035836 | -0.479255 |
| 5             | 6             | 0           | 0.778935                | -3.563513 | 0.241640  |
| 6             | 6             | 0           | -0.184811               | -2.703576 | 0.850478  |
| 7             | 6             | 0           | -1.152466               | -3.308981 | 1.666491  |
| 8             | 1             | 0           | -1.909551               | -2.689369 | 2.125132  |
| 9             | 6             | 0           | -1.197216               | -4.693749 | 1.823804  |

|    |    |   |           |           |           |
|----|----|---|-----------|-----------|-----------|
| 10 | 6  | 0 | -0.283424 | -5.516950 | 1.159829  |
| 11 | 1  | 0 | -0.340181 | -6.593395 | 1.271364  |
| 12 | 6  | 0 | 0.705658  | -4.954828 | 0.361583  |
| 13 | 1  | 0 | 1.443857  | -5.566732 | -0.142299 |
| 14 | 6  | 0 | 3.127181  | -1.194079 | -0.964980 |
| 15 | 6  | 0 | 3.096987  | 0.200264  | -1.177659 |
| 16 | 6  | 0 | 4.143273  | 0.735880  | -1.949182 |
| 17 | 1  | 0 | 4.137880  | 1.792969  | -2.181467 |
| 18 | 6  | 0 | 5.180656  | -0.054081 | -2.429577 |
| 19 | 1  | 0 | 5.979637  | 0.401988  | -3.004330 |
| 20 | 6  | 0 | 5.199168  | -1.431906 | -2.178779 |
| 21 | 1  | 0 | 6.012037  | -2.047101 | -2.546203 |
| 22 | 6  | 0 | 4.169419  | -2.004502 | -1.459660 |
| 23 | 1  | 0 | 4.151164  | -3.067495 | -1.260509 |
| 24 | 16 | 0 | 0.899678  | 1.803059  | -2.611434 |
| 25 | 6  | 0 | 0.176687  | 3.479973  | -2.341048 |
| 26 | 1  | 0 | -0.547222 | 3.672470  | -3.133359 |
| 27 | 1  | 0 | 0.960696  | 4.240455  | -2.399789 |
| 28 | 6  | 0 | -0.518076 | 3.579254  | -0.982995 |
| 29 | 1  | 0 | -0.901455 | 4.598442  | -0.843043 |
| 30 | 6  | 0 | -1.727328 | 2.652354  | -0.904093 |
| 31 | 8  | 0 | -1.820151 | 1.756770  | -0.073171 |
| 32 | 8  | 0 | -2.613275 | 2.961018  | -1.808291 |
| 33 | 7  | 0 | 0.441905  | 3.234100  | 0.098497  |
| 34 | 1  | 0 | 1.100847  | 4.004442  | 0.194678  |
| 35 | 1  | 0 | -0.066524 | 3.183154  | 0.981873  |
| 36 | 16 | 0 | 2.455239  | 0.795915  | 1.753783  |
| 37 | 6  | 0 | 1.452428  | 1.752141  | 2.985280  |
| 38 | 1  | 0 | 2.047343  | 1.823517  | 3.896678  |
| 39 | 1  | 0 | 1.317283  | 2.759448  | 2.599307  |
| 40 | 6  | 0 | 0.096444  | 1.108637  | 3.312854  |
| 41 | 1  | 0 | 0.202354  | 0.402913  | 4.135245  |
| 42 | 7  | 0 | -0.466957 | 0.358568  | 2.159596  |
| 43 | 1  | 0 | -0.793282 | 1.002473  | 1.424029  |
| 44 | 6  | 0 | -0.915217 | 2.198921  | 3.679337  |
| 45 | 8  | 0 | -1.100906 | 3.178296  | 2.996820  |
| 46 | 8  | 0 | -1.593473 | 1.922997  | 4.800560  |
| 47 | 1  | 0 | -1.964454 | -5.135566 | 2.449693  |
| 48 | 1  | 0 | -2.261748 | 2.614789  | 4.935459  |
| 49 | 1  | 0 | -1.311937 | -0.160132 | 2.413528  |
| 50 | 1  | 0 | -4.810702 | 0.567493  | -0.364341 |
| 51 | 1  | 0 | -0.710714 | -1.774421 | 0.087637  |
| 52 | 7  | 0 | -1.482685 | -1.053367 | -1.006131 |
| 53 | 6  | 0 | -2.950742 | -0.944428 | -0.922111 |
| 54 | 1  | 0 | -1.068519 | -0.121744 | -1.068920 |
| 55 | 1  | 0 | -1.252237 | -1.527720 | -1.880545 |
| 56 | 6  | 0 | -3.617963 | -2.296106 | -1.220815 |
| 57 | 1  | 0 | -3.317170 | -0.218415 | -1.650044 |
| 58 | 6  | 0 | -3.413725 | -0.497322 | 0.472554  |
| 59 | 16 | 0 | -3.258683 | -2.918683 | -2.915390 |
| 60 | 1  | 0 | -4.696432 | -2.209089 | -1.093914 |
| 61 | 1  | 0 | -3.248095 | -3.065624 | -0.539989 |
| 62 | 8  | 0 | -2.827312 | -0.841006 | 1.487243  |
| 63 | 8  | 0 | -4.530456 | 0.183663  | 0.531188  |
| 64 | 1  | 0 | -3.871837 | -1.905900 | -3.564445 |
| 65 | 1  | 0 | -3.455948 | 2.381901  | -1.819568 |
| 66 | 17 | 0 | -5.104320 | 1.410268  | -2.091109 |

HF=-3453.6467932\ZeroPoint=0.457563\Thermal=0.498894

G = -16.0 kcal mol<sup>-1</sup>

| Center Number | Atomic Number | Atomic Type | Coordinates (Angstroms) |           |           |
|---------------|---------------|-------------|-------------------------|-----------|-----------|
|               |               |             | X                       | Y         | Z         |
| 1             | 46            | 0           | -0.528608               | 0.107917  | -0.682407 |
| 2             | 46            | 0           | 2.004905                | 1.351591  | -0.276692 |
| 3             | 7             | 0           | -1.357700               | 1.954844  | -0.142289 |
| 4             | 7             | 0           | -2.591604               | 2.184394  | -0.144253 |
| 5             | 6             | 0           | -3.530700               | 1.251475  | -0.600489 |
| 6             | 6             | 0           | -3.340281               | 0.387891  | -1.692569 |
| 7             | 6             | 0           | -4.361481               | -0.475753 | -2.070659 |
| 8             | 1             | 0           | -4.209800               | -1.146987 | -2.907361 |
| 9             | 6             | 0           | -5.573335               | -0.483711 | -1.379285 |
| 10            | 6             | 0           | -5.781535               | 0.410207  | -0.327233 |
| 11            | 1             | 0           | -6.726412               | 0.419334  | 0.202470  |
| 12            | 6             | 0           | -4.777028               | 1.294571  | 0.043595  |
| 13            | 1             | 0           | -4.920789               | 1.999249  | 0.852421  |
| 14            | 6             | 0           | -0.524037               | 3.076637  | 0.205476  |
| 15            | 6             | 0           | 0.884680                | 2.974909  | 0.153769  |
| 16            | 6             | 0           | 1.607403                | 4.156436  | 0.420092  |
| 17            | 1             | 0           | 2.688088                | 4.121254  | 0.400865  |
| 18            | 6             | 0           | 0.984482                | 5.353649  | 0.737704  |
| 19            | 1             | 0           | 1.584244                | 6.234607  | 0.940108  |
| 20            | 6             | 0           | -0.412161               | 5.420209  | 0.814688  |
| 21            | 1             | 0           | -0.907524               | 6.347236  | 1.078614  |
| 22            | 6             | 0           | -1.158431               | 4.293662  | 0.545534  |
| 23            | 1             | 0           | -2.237423               | 4.329243  | 0.583911  |
| 24            | 16            | 0           | 2.866354                | 1.498984  | 1.891633  |
| 25            | 6             | 0           | 4.281580                | 0.332025  | 1.704006  |
| 26            | 1             | 0           | 4.551065                | -0.032991 | 2.695377  |
| 27            | 1             | 0           | 5.148980                | 0.843973  | 1.276095  |
| 28            | 6             | 0           | 3.902098                | -0.846432 | 0.814086  |
| 29            | 1             | 0           | 4.762492                | -1.520513 | 0.698900  |
| 30            | 6             | 0           | 2.775496                | -1.675399 | 1.425784  |
| 31            | 8             | 0           | 1.755548                | -1.943584 | 0.804056  |
| 32            | 8             | 0           | 3.027294                | -2.069246 | 2.641697  |
| 33            | 7             | 0           | 3.462446                | -0.333647 | -0.515097 |
| 34            | 1             | 0           | 4.273354                | 0.073265  | -0.977480 |
| 35            | 1             | 0           | 3.172615                | -1.123546 | -1.091431 |
| 36            | 16            | 0           | 0.674170                | 1.166460  | -2.385692 |
| 37            | 6             | 0           | 1.377760                | -0.306223 | -3.260284 |
| 38            | 1             | 0           | 1.282812                | -0.132504 | -4.333225 |
| 39            | 1             | 0           | 2.438467                | -0.358372 | -3.023409 |
| 40            | 6             | 0           | 0.667617                | -1.612898 | -2.890100 |
| 41            | 1             | 0           | -0.231599               | -1.728085 | -3.494085 |
| 42            | 7             | 0           | 0.256353                | -1.663100 | -1.464706 |
| 43            | 1             | 0           | 1.039058                | -1.883478 | -0.834158 |
| 44            | 6             | 0           | 1.635101                | -2.767574 | -3.151662 |
| 45            | 8             | 0           | 2.651793                | -2.918928 | -2.516407 |
| 46            | 8             | 0           | 1.248418                | -3.564359 | -4.156829 |
| 47            | 1             | 0           | -6.358524               | -1.171056 | -1.671292 |
| 48            | 1             | 0           | 1.908790                | -4.268452 | -4.262763 |
| 49            | 1             | 0           | -0.450505               | -2.394684 | -1.344314 |
| 50            | 1             | 0           | -0.237791               | -3.803754 | 1.972612  |
| 51            | 1             | 0           | -2.419477               | 0.426544  | -2.259031 |



|    |    |   |           |           |           |
|----|----|---|-----------|-----------|-----------|
| 52 | 7  | 0 | -0.934677 | -0.755378 | 1.285087  |
| 53 | 6  | 0 | -1.799571 | -1.915651 | 1.648787  |
| 54 | 1  | 0 | 0.023264  | -0.985700 | 1.562673  |
| 55 | 1  | 0 | -1.223449 | 0.022357  | 1.880815  |
| 56 | 6  | 0 | -3.278915 | -1.554503 | 1.605966  |
| 57 | 1  | 0 | -1.521209 | -2.224759 | 2.659359  |
| 58 | 6  | 0 | -1.500539 | -3.067702 | 0.676173  |
| 59 | 16 | 0 | -3.707429 | -0.204110 | 2.781920  |
| 60 | 1  | 0 | -3.878858 | -2.435185 | 1.834297  |
| 61 | 1  | 0 | -3.561987 | -1.203778 | 0.615835  |
| 62 | 8  | 0 | -1.996877 | -3.079004 | -0.439549 |
| 63 | 8  | 0 | -0.662105 | -3.993835 | 1.068464  |
| 64 | 1  | 0 | -3.320368 | -0.853928 | 3.900673  |
| 65 | 1  | 0 | 2.215145  | -2.552210 | 3.028892  |
| 66 | 17 | 0 | 0.551333  | -3.302876 | 3.684967  |

HF=-3453.6788411\ZeroPoint=0.4615827\Thermal=0.5034194

G = -8.7 kcal mol<sup>-1</sup>

| Center Number | Atomic Number | Atomic Type | Coordinates (Angstroms) |           |           |
|---------------|---------------|-------------|-------------------------|-----------|-----------|
|               |               |             | X                       | Y         | Z         |
| 1             | 46            | 0           | 1.633865                | -1.349629 | -0.938094 |
| 2             | 46            | 0           | -1.820382               | -0.840022 | -0.246737 |
| 3             | 7             | 0           | 1.506362                | -1.640284 | 1.099245  |
| 4             | 7             | 0           | 2.568383                | -1.471274 | 1.769348  |
| 5             | 6             | 0           | 3.651563                | -1.026972 | 1.022270  |
| 6             | 6             | 0           | 3.477439                | -0.771789 | -0.361436 |
| 7             | 6             | 0           | 4.573210                | -0.269859 | -1.058826 |
| 8             | 1             | 0           | 4.505460                | -0.050290 | -2.120878 |
| 9             | 6             | 0           | 5.792126                | -0.029575 | -0.410726 |
| 10            | 6             | 0           | 5.942988                | -0.298175 | 0.951391  |
| 11            | 1             | 0           | 6.893385                | -0.116045 | 1.439182  |
| 12            | 6             | 0           | 4.867847                | -0.798743 | 1.677783  |
| 13            | 1             | 0           | 4.946911                | -1.015281 | 2.736872  |
| 14            | 6             | 0           | 0.360012                | -2.073706 | 1.838754  |
| 15            | 6             | 0           | -0.944323               | -1.695551 | 1.448734  |
| 16            | 6             | 0           | -1.967610               | -2.122450 | 2.326721  |
| 17            | 1             | 0           | -2.999483               | -1.872984 | 2.104116  |
| 18            | 6             | 0           | -1.734012               | -2.892816 | 3.459167  |
| 19            | 1             | 0           | -2.568738               | -3.208471 | 4.076086  |
| 20            | 6             | 0           | -0.430222               | -3.274623 | 3.788349  |
| 21            | 1             | 0           | -0.234873               | -3.891420 | 4.657783  |
| 22            | 6             | 0           | 0.611844                | -2.856842 | 2.985453  |
| 23            | 1             | 0           | 1.632293                | -3.126675 | 3.222097  |
| 24            | 16            | 0           | -3.429025               | -0.296841 | -1.937073 |
| 25            | 6             | 0           | -4.765080               | -0.149015 | -0.689827 |
| 26            | 1             | 0           | -4.972044               | -1.117472 | -0.224116 |
| 27            | 1             | 0           | -5.677774               | 0.195081  | -1.179521 |
| 28            | 6             | 0           | -4.340321               | 0.867742  | 0.381534  |
| 29            | 1             | 0           | -4.319720               | 1.858570  | -0.076903 |
| 30            | 6             | 0           | -5.321792               | 0.876381  | 1.537018  |
| 31            | 8             | 0           | -6.528717               | 1.342724  | 1.160529  |
| 32            | 8             | 0           | -5.084910               | 0.483000  | 2.655647  |
| 33            | 7             | 0           | -2.970718               | 0.570685  | 0.895146  |
| 34            | 1             | 0           | -2.436280               | 1.436679  | 0.803908  |
| 35            | 1             | 0           | -3.026504               | 0.324823  | 1.883217  |

|    |    |   |           |           |           |
|----|----|---|-----------|-----------|-----------|
| 36 | 16 | 0 | -0.510225 | -2.205313 | -1.592973 |
| 37 | 6  | 0 | -0.518645 | -1.519497 | -3.318795 |
| 38 | 1  | 0 | -0.286905 | -2.357703 | -3.981320 |
| 39 | 1  | 0 | -1.518311 | -1.161369 | -3.557411 |
| 40 | 6  | 0 | 0.515955  | -0.412574 | -3.532410 |
| 41 | 1  | 0 | 0.600444  | -0.211970 | -4.609657 |
| 42 | 7  | 0 | 1.835164  | -0.848647 | -2.986861 |
| 43 | 1  | 0 | 2.496085  | -0.077925 | -3.050261 |
| 44 | 6  | 0 | 0.180312  | 0.931992  | -2.870820 |
| 45 | 8  | 0 | -1.039723 | 1.328523  | -3.118657 |
| 46 | 8  | 0 | 1.011035  | 1.536928  | -2.216032 |
| 47 | 1  | 0 | 6.628067  | 0.370525  | -0.974625 |
| 48 | 1  | 0 | 2.199323  | -1.630451 | -3.526680 |
| 49 | 1  | 0 | -7.119141 | 1.288713  | 1.927366  |
| 50 | 1  | 0 | 0.605507  | 0.672244  | 0.216934  |
| 51 | 7  | 0 | 0.603506  | 1.624501  | 0.607961  |
| 52 | 6  | 0 | 1.933897  | 2.281636  | 0.447492  |
| 53 | 1  | 0 | -0.172882 | 2.158413  | 0.110016  |
| 54 | 1  | 0 | 0.374977  | 1.545076  | 1.603336  |
| 55 | 6  | 0 | 1.800751  | 3.758133  | 0.053965  |
| 56 | 1  | 0 | 2.458350  | 1.755691  | -0.349657 |
| 57 | 6  | 0 | 2.709417  | 2.074170  | 1.737794  |
| 58 | 16 | 0 | 0.967094  | 4.811990  | 1.309502  |
| 59 | 1  | 0 | 1.256368  | 3.819993  | -0.887233 |
| 60 | 1  | 0 | 2.802280  | 4.161222  | -0.089822 |
| 61 | 8  | 0 | 2.262535  | 1.545451  | 2.723304  |
| 62 | 8  | 0 | 3.956774  | 2.552670  | 1.627943  |
| 63 | 1  | 0 | -0.285497 | 4.580999  | 0.848134  |
| 64 | 17 | 0 | -1.679116 | 3.145864  | -0.693195 |
| 65 | 1  | 0 | -1.315042 | 2.044886  | -2.477883 |
| 66 | 1  | 0 | 4.426009  | 2.365589  | 2.454940  |

HF=-3453.665964\ZeroPoint=0.4610344\Thermal=0.5033347

G = 2.3 kcal mol<sup>-1</sup>

| Center Number | Atomic Number | Atomic Type | Coordinates (Angstroms) |           |           |
|---------------|---------------|-------------|-------------------------|-----------|-----------|
|               |               |             | X                       | Y         | Z         |
| 1             | 46            | 0           | 1.875223                | -1.451281 | -0.302459 |
| 2             | 46            | 0           | -1.739948               | -0.922280 | 0.491435  |
| 3             | 7             | 0           | 2.031874                | -0.575982 | 1.529955  |
| 4             | 7             | 0           | 3.165370                | -0.132464 | 1.879875  |
| 5             | 6             | 0           | 4.129222                | -0.226170 | 0.884705  |
| 6             | 6             | 0           | 3.749371                | -0.723239 | -0.389734 |
| 7             | 6             | 0           | 4.713545                | -0.710754 | -1.390980 |
| 8             | 1             | 0           | 4.484276                | -1.069764 | -2.390015 |
| 9             | 6             | 0           | 6.004582                | -0.227479 | -1.136830 |
| 10            | 6             | 0           | 6.361113                | 0.244507  | 0.128479  |
| 11            | 1             | 0           | 7.365013                | 0.609176  | 0.309764  |
| 12            | 6             | 0           | 5.418647                | 0.250058  | 1.150030  |
| 13            | 1             | 0           | 5.656815                | 0.616515  | 2.142057  |
| 14            | 6             | 0           | 0.974764                | -0.398459 | 2.481379  |
| 15            | 6             | 0           | -0.287055               | 0.069013  | 2.042080  |
| 16            | 6             | 0           | -1.165645               | 0.433716  | 3.083312  |
| 17            | 1             | 0           | -2.112768               | 0.901336  | 2.846733  |
| 18            | 6             | 0           | -0.881834               | 0.232239  | 4.431002  |
| 19            | 1             | 0           | -1.614271               | 0.501425  | 5.183806  |

|    |    |   |           |           |           |    |    |   |           |           |           |
|----|----|---|-----------|-----------|-----------|----|----|---|-----------|-----------|-----------|
| 20 | 6  | 0 | 0.343174  | -0.316055 | 4.806296  | 4  | 7  | 0 | -4.109714 | 1.098668  | 0.762050  |
| 21 | 1  | 0 | 0.572170  | -0.494736 | 5.850390  | 5  | 6  | 0 | -4.622298 | -0.109013 | 0.312199  |
| 22 | 6  | 0 | 1.286440  | -0.601201 | 3.829669  | 6  | 6  | 0 | -3.879055 | -0.863987 | -0.630883 |
| 23 | 1  | 0 | 2.267442  | -0.972782 | 4.096394  | 7  | 6  | 0 | -4.427818 | -2.069851 | -1.052691 |
| 24 | 16 | 0 | -3.441168 | -2.256659 | -0.365576 | 8  | 1  | 0 | -3.912248 | -2.700098 | -1.771206 |
| 25 | 6  | 0 | -4.848813 | -1.213256 | 0.182276  | 9  | 6  | 0 | -5.661936 | -2.511092 | -0.554367 |
| 26 | 1  | 0 | -5.033649 | -1.354975 | 1.251041  | 10 | 6  | 0 | -6.377164 | -1.751123 | 0.372899  |
| 27 | 1  | 0 | -5.736886 | -1.527725 | -0.368793 | 11 | 1  | 0 | -7.329570 | -2.105044 | 0.748396  |
| 28 | 6  | 0 | -4.527291 | 0.249812  | -0.109189 | 12 | 6  | 0 | -5.858561 | -0.538112 | 0.810478  |
| 29 | 1  | 0 | -4.412429 | 0.394547  | -1.184427 | 13 | 1  | 0 | -6.386561 | 0.080029  | 1.527087  |
| 30 | 6  | 0 | -5.633749 | 1.161382  | 0.398373  | 14 | 6  | 0 | -2.441793 | 2.649857  | 0.676221  |
| 31 | 8  | 0 | -6.736872 | 1.075631  | -0.367458 | 15 | 6  | 0 | -1.091676 | 2.776645  | 1.002160  |
| 32 | 8  | 0 | -5.558983 | 1.849753  | 1.388131  | 16 | 6  | 0 | -0.584585 | 4.023560  | 1.348974  |
| 33 | 7  | 0 | -3.238939 | 0.625770  | 0.529982  | 17 | 1  | 0 | 0.464169  | 4.114819  | 1.603446  |
| 34 | 1  | 0 | -2.859856 | 1.391298  | -0.041896 | 18 | 6  | 0 | -1.416999 | 5.141460  | 1.358191  |
| 35 | 1  | 0 | -3.444531 | 0.998774  | 1.455694  | 19 | 1  | 0 | -1.014930 | 6.114970  | 1.613745  |
| 36 | 16 | 0 | -0.202300 | -2.618760 | 0.026511  | 20 | 6  | 0 | -2.767921 | 5.008811  | 1.029826  |
| 37 | 6  | 0 | -0.468129 | -3.076740 | -1.756743 | 21 | 1  | 0 | -3.415327 | 5.878051  | 1.027395  |
| 38 | 1  | 0 | -0.139850 | -4.114231 | -1.858405 | 22 | 6  | 0 | -3.287743 | 3.765092  | 0.692652  |
| 39 | 1  | 0 | -1.529530 | -3.023216 | -1.991636 | 23 | 1  | 0 | -4.329690 | 3.646324  | 0.425217  |
| 40 | 6  | 0 | 0.323591  | -2.192348 | -2.717180 | 24 | 16 | 0 | 2.941728  | 2.132660  | -1.445475 |
| 41 | 1  | 0 | 0.239891  | -2.608080 | -3.730953 | 25 | 6  | 0 | 4.568535  | 1.973883  | -0.586420 |
| 42 | 7  | 0 | 1.754907  | -2.144673 | -2.298147 | 26 | 1  | 0 | 4.598952  | 2.643027  | 0.278668  |
| 43 | 1  | 0 | 2.244507  | -1.457663 | -2.868216 | 27 | 1  | 0 | 5.352148  | 2.274992  | -1.283490 |
| 44 | 6  | 0 | -0.163488 | -0.735667 | -2.802813 | 28 | 6  | 0 | 4.788735  | 0.532765  | -0.127833 |
| 45 | 8  | 0 | -1.462216 | -0.643064 | -2.932065 | 29 | 1  | 0 | 4.842118  | -0.127355 | -0.994556 |
| 46 | 8  | 0 | 0.626788  | 0.187820  | -2.770087 | 30 | 6  | 0 | 6.080077  | 0.424070  | 0.672069  |
| 47 | 1  | 0 | 6.737789  | -0.219655 | -1.936489 | 31 | 8  | 0 | 7.159708  | 0.387312  | -0.133164 |
| 48 | 1  | 0 | 2.197549  | -3.051322 | -2.427069 | 32 | 8  | 0 | 6.140554  | 0.418868  | 1.876434  |
| 49 | 1  | 0 | -7.412688 | 1.656366  | 0.014634  | 33 | 7  | 0 | 3.641513  | 0.094345  | 0.701216  |
| 50 | 1  | 0 | -0.224593 | 0.917744  | 0.919541  | 34 | 1  | 0 | 3.676972  | -0.936559 | 0.779044  |
| 51 | 7  | 0 | -0.068038 | 1.986616  | 0.101209  | 35 | 1  | 0 | 3.739009  | 0.486289  | 1.638436  |
| 52 | 6  | 0 | 1.274859  | 2.216938  | -0.450632 | 36 | 16 | 0 | -0.060021 | 1.139470  | -1.617097 |
| 53 | 1  | 0 | -0.745159 | 1.900019  | -0.675097 | 37 | 6  | 0 | 0.296018  | 0.146207  | -3.138354 |
| 54 | 1  | 0 | -0.343561 | 2.804826  | 0.644742  | 38 | 1  | 0 | -0.225280 | 0.642328  | -3.960667 |
| 55 | 6  | 0 | 1.260710  | 3.109406  | -1.708073 | 39 | 1  | 0 | 1.367154  | 0.180335  | -3.330632 |
| 56 | 1  | 0 | 1.690662  | 1.249806  | -0.753633 | 40 | 6  | 0 | -0.184477 | -1.295502 | -3.022455 |
| 57 | 6  | 0 | 2.160183  | 2.766549  | 0.651999  | 41 | 1  | 0 | -0.093925 | -1.782385 | -4.002583 |
| 58 | 16 | 0 | 0.452637  | 4.745107  | -1.469816 | 42 | 7  | 0 | -1.608313 | -1.339387 | -2.572179 |
| 59 | 1  | 0 | 0.741305  | 2.576827  | -2.501623 | 43 | 1  | 0 | -1.773340 | -2.264222 | -2.173662 |
| 60 | 1  | 0 | 2.285616  | 3.297808  | -2.025257 | 44 | 6  | 0 | 0.618382  | -2.159544 | -2.040737 |
| 61 | 8  | 0 | 1.796263  | 3.022442  | 1.771145  | 45 | 8  | 0 | 1.910539  | -2.070359 | -2.225591 |
| 62 | 8  | 0 | 3.429079  | 2.928431  | 0.222842  | 46 | 8  | 0 | 0.050268  | -2.850697 | -1.215995 |
| 63 | 1  | 0 | -0.800325 | 4.305086  | -1.727035 | 47 | 1  | 0 | -6.065308 | -3.458809 | -0.895101 |
| 64 | 17 | 0 | -2.343661 | 2.112740  | -2.146502 | 48 | 1  | 0 | -2.238630 | -1.206902 | -3.358843 |
| 65 | 1  | 0 | -1.766431 | 0.313140  | -2.808656 | 49 | 1  | 0 | 7.949619  | 0.350108  | 0.427941  |
| 66 | 1  | 0 | 3.952540  | 3.255165  | 0.969440  | 50 | 1  | 0 | -0.446358 | 1.911089  | 1.018756  |
|    |    |   |           |           |           | 51 | 7  | 0 | 0.991723  | -1.060374 | 1.084302  |
|    |    |   |           |           |           | 52 | 6  | 0 | -0.383014 | -1.414925 | 1.458554  |
|    |    |   |           |           |           | 53 | 1  | 0 | 1.454343  | -1.882042 | 0.676860  |
|    |    |   |           |           |           | 54 | 1  | 0 | 1.489807  | -0.893073 | 1.958163  |
|    |    |   |           |           |           | 55 | 6  | 0 | -0.514243 | -2.887943 | 1.904059  |
|    |    |   |           |           |           | 56 | 1  | 0 | -1.034512 | -1.284869 | 0.587445  |
|    |    |   |           |           |           | 57 | 6  | 0 | -0.864546 | -0.449759 | 2.522627  |
|    |    |   |           |           |           | 58 | 16 | 0 | 0.655641  | -3.393247 | 3.232913  |
|    |    |   |           |           |           | 59 | 1  | 0 | -0.352762 | -3.523552 | 1.036231  |
|    |    |   |           |           |           | 60 | 1  | 0 | -1.519738 | -3.065060 | 2.285256  |
|    |    |   |           |           |           | 61 | 8  | 0 | -0.181677 | 0.375257  | 3.075270  |

HF=-3453.6450197\ZeroPoint=0.4571834\Thermal=0.4992004

G = -28.8 kcal mol<sup>-1</sup>

| Center Number | Atomic Number | Atomic Type | Coordinates (Angstroms) |          |           |
|---------------|---------------|-------------|-------------------------|----------|-----------|
|               |               |             | X                       | Y        | Z         |
| 1             | 46            | 0           | -2.139115               | 0.050758 | -1.073532 |
| 2             | 46            | 0           | 1.774161                | 0.556516 | -0.215451 |
| 3             | 7             | 0           | -2.959542               | 1.368162 | 0.311057  |

|    |    |   |           |           |           |
|----|----|---|-----------|-----------|-----------|
| 62 | 8  | 0 | -2.179617 | -0.617809 | 2.778898  |
| 63 | 1  | 0 | 1.730046  | -3.557641 | 2.425611  |
| 64 | 17 | 0 | 3.344552  | -3.037950 | 0.176264  |
| 65 | 1  | 0 | 2.422681  | -2.528957 | -1.471501 |
| 66 | 1  | 0 | -2.431287 | 0.023172  | 3.460874  |

|    |   |   |           |           |           |
|----|---|---|-----------|-----------|-----------|
| 46 | 8 | 0 | 0.138459  | 3.288937  | 0.537597  |
| 47 | 1 | 0 | -5.525510 | -3.009510 | -0.374978 |
| 48 | 1 | 0 | 1.540227  | -4.692148 | -1.347386 |
| 49 | 1 | 0 | 0.181105  | 4.441367  | -2.566713 |
| 50 | 1 | 0 | 0.779764  | 2.729023  | 1.030525  |

HF=-3453.7006807\ZeroPoint=0.4649438\Thermal=0.5070997

HF=-2270.6473927\ZeroPoint=0.3521741\Thermal=0.3831045

G = 24.9 kcal mol<sup>-1</sup>

G = 37.0 kcal mol<sup>-1</sup>

| Center Number | Atomic Number | Atomic Type | Coordinates (Angstroms) |           |           |
|---------------|---------------|-------------|-------------------------|-----------|-----------|
|               |               |             | X                       | Y         | Z         |
| 1             | 46            | 0           | -1.463896               | 0.230697  | -0.277694 |
| 2             | 46            | 0           | 1.841875                | 0.235168  | -0.198102 |
| 3             | 7             | 0           | -0.690423               | -0.349759 | 1.616976  |
| 4             | 7             | 0           | -1.380559               | -1.190121 | 2.265283  |
| 5             | 6             | 0           | -2.463815               | -1.676504 | 1.545819  |
| 6             | 6             | 0           | -2.789366               | -1.115553 | 0.282090  |
| 7             | 6             | 0           | -3.900358               | -1.605622 | -0.393588 |
| 8             | 1             | 0           | -4.181020               | -1.196127 | -1.356676 |
| 9             | 6             | 0           | -4.664164               | -2.634559 | 0.167794  |
| 10            | 6             | 0           | -4.339350               | -3.181894 | 1.412696  |
| 11            | 1             | 0           | -4.945619               | -3.975376 | 1.833372  |
| 12            | 6             | 0           | -3.240387               | -2.699147 | 2.109477  |
| 13            | 1             | 0           | -2.964045               | -3.091316 | 3.081273  |
| 14            | 6             | 0           | 0.314201                | 0.347321  | 2.358511  |
| 15            | 6             | 0           | 1.505961                | 0.745789  | 1.715004  |
| 16            | 6             | 0           | 2.435367                | 1.469894  | 2.478496  |
| 17            | 1             | 0           | 3.381198                | 1.750195  | 2.029761  |
| 18            | 6             | 0           | 2.181555                | 1.814396  | 3.808187  |
| 19            | 1             | 0           | 2.915082                | 2.386696  | 4.365763  |
| 20            | 6             | 0           | 0.993203                | 1.414589  | 4.418505  |
| 21            | 1             | 0           | 0.789801                | 1.678993  | 5.449798  |
| 22            | 6             | 0           | 0.062008                | 0.678393  | 3.697326  |
| 23            | 1             | 0           | -0.870863               | 0.364245  | 4.148067  |
| 24            | 16            | 0           | 3.370364                | -1.315892 | 0.511141  |
| 25            | 6             | 0           | 3.956648                | -1.821005 | -1.168808 |
| 26            | 1             | 0           | 4.406539                | -2.810723 | -1.081663 |
| 27            | 1             | 0           | 4.721453                | -1.127213 | -1.529767 |
| 28            | 6             | 0           | 2.811171                | -1.859570 | -2.178684 |
| 29            | 1             | 0           | 3.204937                | -2.147880 | -3.164700 |
| 30            | 6             | 0           | 1.734889                | -2.889036 | -1.845905 |
| 31            | 8             | 0           | 0.551799                | -2.673729 | -1.902535 |
| 32            | 8             | 0           | 2.269529                | -4.088073 | -1.553074 |
| 33            | 7             | 0           | 2.155750                | -0.528102 | -2.244684 |
| 34            | 1             | 0           | 2.714669                | 0.106614  | -2.808094 |
| 35            | 1             | 0           | 1.236133                | -0.615453 | -2.676871 |
| 36            | 16            | 0           | -2.733425               | 1.078085  | -2.030470 |
| 37            | 6             | 0           | -1.746613               | 2.542204  | -2.568415 |
| 38            | 1             | 0           | -0.902609               | 2.220954  | -3.185153 |
| 39            | 1             | 0           | -2.407271               | 3.149012  | -3.188574 |
| 40            | 6             | 0           | -1.231803               | 3.435672  | -1.436158 |
| 41            | 1             | 0           | -2.062088               | 3.728356  | -0.790007 |
| 42            | 7             | 0           | -0.617880               | 4.654337  | -1.977673 |
| 43            | 1             | 0           | -0.320225               | 5.288196  | -1.243873 |
| 44            | 6             | 0           | -0.221558               | 2.684982  | -0.573614 |
| 45            | 8             | 0           | 0.299782                | 1.621692  | -0.959481 |

| Center Number | Atomic Number | Atomic Type | Coordinates (Angstroms) |           |           |
|---------------|---------------|-------------|-------------------------|-----------|-----------|
|               |               |             | X                       | Y         | Z         |
| 1             | 46            | 0           | -1.597582               | 0.305617  | -0.150138 |
| 2             | 46            | 0           | 1.758293                | 0.506534  | -0.100223 |
| 3             | 7             | 0           | -0.689360               | -1.081291 | 1.253559  |
| 4             | 7             | 0           | -1.337514               | -2.164848 | 1.402490  |
| 5             | 6             | 0           | -2.475985               | -2.260168 | 0.628792  |
| 6             | 6             | 0           | -2.907867               | -1.161551 | -0.165216 |
| 7             | 6             | 0           | -4.093392               | -1.298628 | -0.881000 |
| 8             | 1             | 0           | -4.460827               | -0.480826 | -1.489658 |
| 9             | 6             | 0           | -4.821001               | -2.490413 | -0.819999 |
| 10            | 6             | 0           | -4.386552               | -3.569161 | -0.040226 |
| 11            | 1             | 0           | -4.966040               | -4.484010 | -0.004825 |
| 12            | 6             | 0           | -3.215559               | -3.454860 | 0.690802  |
| 13            | 1             | 0           | -2.851409               | -4.262547 | 1.314981  |
| 14            | 6             | 0           | 0.383527                | -0.887689 | 2.179988  |
| 15            | 6             | 0           | 1.331635                | 0.147256  | 1.949757  |
| 16            | 6             | 0           | 2.366314                | 0.303689  | 2.899637  |
| 17            | 1             | 0           | 3.096766                | 1.087550  | 2.737839  |
| 18            | 6             | 0           | 2.459947                | -0.497807 | 4.027503  |
| 19            | 1             | 0           | 3.261300                | -0.349745 | 4.742114  |
| 20            | 6             | 0           | 1.505555                | -1.497438 | 4.232265  |
| 21            | 1             | 0           | 1.563535                | -2.129735 | 5.111509  |
| 22            | 6             | 0           | 0.471372                | -1.689209 | 3.325558  |
| 23            | 1             | 0           | -0.270807               | -2.457792 | 3.489693  |
| 24            | 16            | 0           | 3.492776                | -0.998627 | 0.024379  |
| 25            | 6             | 0           | 4.155192                | -0.700332 | -1.674303 |
| 26            | 1             | 0           | 4.753721                | -1.565272 | -1.962334 |
| 27            | 1             | 0           | 4.800736                | 0.182497  | -1.683474 |
| 28            | 6             | 0           | 3.018410                | -0.494248 | -2.669800 |
| 29            | 1             | 0           | 3.428626                | -0.268710 | -3.664974 |
| 30            | 6             | 0           | 2.129053                | -1.721010 | -2.853224 |
| 31            | 8             | 0           | 0.926338                | -1.684279 | -2.881687 |
| 32            | 8             | 0           | 2.856489                | -2.833460 | -3.053713 |
| 33            | 7             | 0           | 2.153045                | 0.622028  | -2.203936 |
| 34            | 1             | 0           | 2.580228                | 1.516661  | -2.428733 |
| 35            | 1             | 0           | 1.241956                | 0.577460  | -2.661958 |
| 36            | 16            | 0           | -2.968059               | 1.815579  | -1.254226 |
| 37            | 6             | 0           | -2.003418               | 3.387063  | -1.127839 |
| 38            | 1             | 0           | -1.229938               | 3.408794  | -1.899718 |
| 39            | 1             | 0           | -2.710251               | 4.193027  | -1.330643 |
| 40            | 6             | 0           | -1.364991               | 3.657535  | 0.237942  |
| 41            | 1             | 0           | -2.129657               | 3.618327  | 1.016423  |
| 42            | 7             | 0           | -0.758717               | 4.995058  | 0.261840  |
| 43            | 1             | 0           | -0.365273               | 5.200970  | 1.174547  |
| 44            | 6             | 0           | -0.318169               | 2.592342  | 0.589402  |
| 45            | 8             | 0           | 0.106433                | 1.840297  | -0.361033 |

|    |   |   |           |           |           |
|----|---|---|-----------|-----------|-----------|
| 46 | 8 | 0 | 0.137419  | 2.511247  | 1.763414  |
| 47 | 1 | 0 | -5.741768 | -2.576981 | -1.387467 |
| 48 | 1 | 0 | 2.240136  | -3.573135 | -3.164657 |
| 49 | 1 | 0 | -0.015693 | 5.072496  | -0.426395 |
| 50 | 1 | 0 | 0.796482  | 1.401495  | 1.798162  |

|    |   |   |           |           |           |
|----|---|---|-----------|-----------|-----------|
| 46 | 8 | 0 | -1.348526 | 3.185894  | -0.774219 |
| 47 | 1 | 0 | 6.342426  | -1.160166 | 2.011523  |
| 48 | 1 | 0 | -3.656437 | -1.138269 | 4.381559  |
| 49 | 1 | 0 | -0.032330 | 5.283801  | -1.161890 |
| 50 | 1 | 0 | -0.104312 | -0.199842 | -2.492680 |

HF=-2270.6257683\ZeroPoint=0.3482036\Thermal=0.3785085

HF=-2270.670053\ZeroPoint=0.3527484\Thermal=0.3834317

G = 11.6 kcal mol<sup>-1</sup>

G = 33.5 kcal mol<sup>-1</sup>

| Center Number | Atomic Number | Atomic Type | Coordinates (Angstroms) |           |           |
|---------------|---------------|-------------|-------------------------|-----------|-----------|
|               |               |             | X                       | Y         | Z         |
| 1             | 46            | 0           | 1.827640                | 0.339020  | -0.140572 |
| 2             | 46            | 0           | -1.685331               | 0.070874  | -0.441097 |
| 3             | 7             | 0           | 1.139149                | -1.616273 | -0.658233 |
| 4             | 7             | 0           | 1.873524                | -2.587136 | -0.273902 |
| 5             | 6             | 0           | 3.035411                | -2.184933 | 0.340093  |
| 6             | 6             | 0           | 3.309826                | -0.795546 | 0.518612  |
| 7             | 6             | 0           | 4.519811                | -0.459752 | 1.125169  |
| 8             | 1             | 0           | 4.778100                | 0.581408  | 1.280098  |
| 9             | 6             | 0           | 5.409438                | -1.451907 | 1.540340  |
| 10            | 6             | 0           | 5.123437                | -2.813717 | 1.363908  |
| 11            | 1             | 0           | 5.829026                | -3.566369 | 1.694923  |
| 12            | 6             | 0           | 3.935575                | -3.183990 | 0.761896  |
| 13            | 1             | 0           | 3.675769                | -4.223665 | 0.600292  |
| 14            | 6             | 0           | -0.066553               | -1.999784 | -1.297426 |
| 15            | 6             | 0           | -0.664494               | -1.078474 | -2.197441 |
| 16            | 6             | 0           | -1.806136               | -1.468957 | -2.931669 |
| 17            | 1             | 0           | -2.233897               | -0.773481 | -3.642905 |
| 18            | 6             | 0           | -2.359366               | -2.727018 | -2.752578 |
| 19            | 1             | 0           | -3.248699               | -3.015245 | -3.298299 |
| 20            | 6             | 0           | -1.775389               | -3.613535 | -1.839823 |
| 21            | 1             | 0           | -2.218548               | -4.590910 | -1.687020 |
| 22            | 6             | 0           | -0.647510               | -3.262446 | -1.111368 |
| 23            | 1             | 0           | -0.199867               | -3.946476 | -0.404366 |
| 24            | 16            | 0           | -3.500845               | -1.255085 | 0.056150  |
| 25            | 6             | 0           | -4.475014               | 0.056324  | 0.911733  |
| 26            | 1             | 0           | -5.283292               | -0.421169 | 1.466504  |
| 27            | 1             | 0           | -4.911746               | 0.739462  | 0.179779  |
| 28            | 6             | 0           | -3.561965               | 0.837888  | 1.846803  |
| 29            | 1             | 0           | -4.099644               | 1.690841  | 2.284317  |
| 30            | 6             | 0           | -3.046929               | 0.017786  | 3.026686  |
| 31            | 8             | 0           | -1.904038               | 0.021506  | 3.404613  |
| 32            | 8             | 0           | -4.040565               | -0.652094 | 3.636219  |
| 33            | 7             | 0           | -2.383446               | 1.323826  | 1.084820  |
| 34            | 1             | 0           | -2.540015               | 2.201568  | 0.582852  |
| 35            | 1             | 0           | -1.593624               | 1.461024  | 1.717252  |
| 36            | 16            | 0           | 2.861973                | 2.261100  | 0.599292  |
| 37            | 6             | 0           | 1.815104                | 3.690043  | 0.094058  |
| 38            | 1             | 0           | 1.147179                | 3.969117  | 0.915676  |
| 39            | 1             | 0           | 2.507604                | 4.517552  | -0.066703 |
| 40            | 6             | 0           | 1.002625                | 3.529674  | -1.205756 |
| 41            | 1             | 0           | 1.622062                | 2.997541  | -1.932199 |
| 42            | 7             | 0           | 0.674722                | 4.845673  | -1.746611 |
| 43            | 1             | 0           | 0.251570                | 4.749137  | -2.664676 |
| 44            | 6             | 0           | -0.239803               | 2.674458  | -0.905461 |
| 45            | 8             | 0           | -0.023324               | 1.386383  | -0.774552 |

| Center Number | Atomic Number | Atomic Type | Coordinates (Angstroms) |           |           |
|---------------|---------------|-------------|-------------------------|-----------|-----------|
|               |               |             | X                       | Y         | Z         |
| 1             | 46            | 0           | -1.903617               | 0.242614  | -0.262887 |
| 2             | 46            | 0           | 1.558425                | 0.393594  | 0.094423  |
| 3             | 7             | 0           | -1.121630               | -1.541593 | 0.586044  |
| 4             | 7             | 0           | -1.781670               | -2.599257 | 0.347564  |
| 5             | 6             | 0           | -2.840522               | -2.403581 | -0.524036 |
| 6             | 6             | 0           | -3.191536               | -1.088847 | -0.933639 |
| 7             | 6             | 0           | -4.292124               | -0.930547 | -1.769272 |
| 8             | 1             | 0           | -4.589234               | 0.057031  | -2.100630 |
| 9             | 6             | 0           | -5.017974               | -2.048525 | -2.192697 |
| 10            | 6             | 0           | -4.665870               | -3.340053 | -1.786374 |
| 11            | 1             | 0           | -5.243019               | -4.192972 | -2.123181 |
| 12            | 6             | 0           | -3.579068               | -3.521070 | -0.944077 |
| 13            | 1             | 0           | -3.284839               | -4.504498 | -0.596312 |
| 14            | 6             | 0           | -0.181264               | -1.629121 | 1.661993  |
| 15            | 6             | 0           | 0.964854                | -0.806395 | 1.666385  |
| 16            | 6             | 0           | 1.812064                | -0.916751 | 2.784445  |
| 17            | 1             | 0           | 2.711684                | -0.308210 | 2.833671  |
| 18            | 6             | 0           | 1.539537                | -1.776760 | 3.850059  |
| 19            | 1             | 0           | 2.211403                | -1.817657 | 4.700680  |
| 20            | 6             | 0           | 0.395938                | -2.573244 | 3.816989  |
| 21            | 1             | 0           | 0.166196                | -3.239427 | 4.640580  |
| 22            | 6             | 0           | -0.461785               | -2.499652 | 2.727899  |
| 23            | 1             | 0           | -1.361915               | -3.099559 | 2.690658  |
| 24            | 16            | 0           | 2.402957                | 1.705295  | -1.707038 |
| 25            | 6             | 0           | 4.047839                | 0.883564  | -1.781141 |
| 26            | 1             | 0           | 4.740424                | 1.328973  | -1.058557 |
| 27            | 1             | 0           | 4.470593                | 1.010505  | -2.778404 |
| 28            | 6             | 0           | 3.901982                | -0.613551 | -1.483604 |
| 29            | 1             | 0           | 3.268708                | -1.064339 | -2.249318 |
| 30            | 6             | 0           | 5.256577                | -1.306243 | -1.460424 |
| 31            | 8             | 0           | 5.829538                | -1.654596 | -0.456228 |
| 32            | 8             | 0           | 5.759726                | -1.449466 | -2.699527 |
| 33            | 7             | 0           | 3.232018                | -0.792648 | -0.164650 |
| 34            | 1             | 0           | 2.975688                | -1.767800 | -0.023603 |
| 35            | 1             | 0           | 3.904648                | -0.583344 | 0.574245  |
| 36            | 16            | 0           | -3.201296               | 2.085982  | -0.801988 |
| 37            | 6             | 0           | -2.072158               | 3.485475  | -0.401584 |
| 38            | 1             | 0           | -1.253062               | 3.522502  | -1.123652 |
| 39            | 1             | 0           | -2.658732               | 4.399270  | -0.504009 |
| 40            | 6             | 0           | -1.499762               | 3.462939  | 1.017961  |
| 41            | 1             | 0           | -2.306850               | 3.414749  | 1.751353  |
| 42            | 7             | 0           | -0.706756               | 4.672292  | 1.268156  |
| 43            | 1             | 0           | -0.353631               | 4.714300  | 2.217860  |
| 44            | 6             | 0           | -0.602283               | 2.251064  | 1.222360  |
| 45            | 8             | 0           | -0.130586               | 1.636202  | 0.241980  |

|    |   |   |           |           |           |
|----|---|---|-----------|-----------|-----------|
| 46 | 8 | 0 | -0.253220 | 1.978497  | 2.456684  |
| 47 | 1 | 0 | -5.870985 | -1.906896 | -2.847966 |
| 48 | 1 | 0 | 6.639122  | -1.851518 | -2.624744 |
| 49 | 1 | 0 | 0.073024  | 4.749785  | 0.621963  |
| 50 | 1 | 0 | 0.328978  | 1.184213  | 2.462606  |

|    |   |   |           |           |           |
|----|---|---|-----------|-----------|-----------|
| 46 | 8 | 0 | -0.397407 | 1.769705  | 2.326525  |
| 47 | 1 | 0 | -5.890279 | -2.355369 | -2.406560 |
| 48 | 1 | 0 | 6.509706  | -1.753599 | -2.570687 |
| 49 | 1 | 0 | -0.491482 | 4.829283  | 0.812997  |
| 50 | 1 | 0 | 0.275169  | 0.789342  | 2.073258  |

HF=-2270.6342739\ZeroPoint=0.352536\Thermal=0.3835132

HF=-2270.6214646\ZeroPoint=0.3489617\Thermal=0.3792856

G = 40.1 kcal mol<sup>-1</sup>

G = 14.6 kcal mol<sup>-1</sup>

| Center Number | Atomic Number | Atomic Type | Coordinates (Angstroms) |           |           |
|---------------|---------------|-------------|-------------------------|-----------|-----------|
|               |               |             | X                       | Y         | Z         |
| 1             | 46            | 0           | -1.898210               | 0.164607  | -0.228408 |
| 2             | 46            | 0           | 1.462156                | 0.685642  | 0.058776  |
| 3             | 7             | 0           | -0.907369               | -1.559081 | 0.637914  |
| 4             | 7             | 0           | -1.503613               | -2.661500 | 0.420276  |
| 5             | 6             | 0           | -2.639869               | -2.555316 | -0.352369 |
| 6             | 6             | 0           | -3.128750               | -1.280312 | -0.749565 |
| 7             | 6             | 0           | -4.307401               | -1.234214 | -1.488665 |
| 8             | 1             | 0           | -4.716047               | -0.282361 | -1.806193 |
| 9             | 6             | 0           | -4.974073               | -2.414407 | -1.828422 |
| 10            | 6             | 0           | -4.484990               | -3.666364 | -1.435294 |
| 11            | 1             | 0           | -5.018401               | -4.569451 | -1.706981 |
| 12            | 6             | 0           | -3.319672               | -3.739847 | -0.691090 |
| 13            | 1             | 0           | -2.914930               | -4.688165 | -0.357258 |
| 14            | 6             | 0           | 0.171701                | -1.634982 | 1.580456  |
| 15            | 6             | 0           | 0.936236                | -0.474511 | 1.849275  |
| 16            | 6             | 0           | 1.951565                | -0.582113 | 2.823218  |
| 17            | 1             | 0           | 2.526755                | 0.305550  | 3.070810  |
| 18            | 6             | 0           | 2.228063                | -1.773145 | 3.483007  |
| 19            | 1             | 0           | 3.013185                | -1.821253 | 4.229348  |
| 20            | 6             | 0           | 1.471051                | -2.908998 | 3.178393  |
| 21            | 1             | 0           | 1.673195                | -3.847879 | 3.681913  |
| 22            | 6             | 0           | 0.445186                | -2.842565 | 2.246198  |
| 23            | 1             | 0           | -0.154383               | -3.714224 | 2.024230  |
| 24            | 16            | 0           | 2.149698                | 1.712058  | -1.921881 |
| 25            | 6             | 0           | 3.829548                | 0.962896  | -1.997167 |
| 26            | 1             | 0           | 4.543018                | 1.548692  | -1.408113 |
| 27            | 1             | 0           | 4.166247                | 0.955770  | -3.034409 |
| 28            | 6             | 0           | 3.780419                | -0.470103 | -1.460834 |
| 29            | 1             | 0           | 3.128178                | -1.066361 | -2.101146 |
| 30            | 6             | 0           | 5.167278                | -1.095965 | -1.416270 |
| 31            | 8             | 0           | 5.804798                | -1.272153 | -0.406870 |
| 32            | 8             | 0           | 5.610846                | -1.397887 | -2.649410 |
| 33            | 7             | 0           | 3.194908                | -0.449818 | -0.092576 |
| 34            | 1             | 0           | 3.005119                | -1.396835 | 0.231488  |
| 35            | 1             | 0           | 3.890811                | -0.081333 | 0.557135  |
| 36            | 16            | 0           | -3.390110               | 1.848838  | -0.776641 |
| 37            | 6             | 0           | -2.475774               | 3.369684  | -0.273544 |
| 38            | 1             | 0           | -1.701429               | 3.594704  | -1.009987 |
| 39            | 1             | 0           | -3.203926               | 4.182093  | -0.279468 |
| 40            | 6             | 0           | -1.851194               | 3.305252  | 1.122282  |
| 41            | 1             | 0           | -2.616247               | 3.079680  | 1.867203  |
| 42            | 7             | 0           | -1.234409               | 4.592329  | 1.463926  |
| 43            | 1             | 0           | -0.849695               | 4.585393  | 2.402783  |
| 44            | 6             | 0           | -0.796528               | 2.200068  | 1.203522  |
| 45            | 8             | 0           | -0.284845               | 1.797416  | 0.097698  |

| Center Number | Atomic Number | Atomic Type | Coordinates (Angstroms) |           |           |
|---------------|---------------|-------------|-------------------------|-----------|-----------|
|               |               |             | X                       | Y         | Z         |
| 1             | 46            | 0           | -2.012988               | 0.176180  | -0.097581 |
| 2             | 46            | 0           | 1.468775                | 0.415004  | 0.220448  |
| 3             | 7             | 0           | -1.144150               | -1.615805 | 0.652404  |
| 4             | 7             | 0           | -1.784935               | -2.697383 | 0.422990  |
| 5             | 6             | 0           | -2.985390               | -2.487553 | -0.217025 |
| 6             | 6             | 0           | -3.393328               | -1.161386 | -0.559682 |
| 7             | 6             | 0           | -4.634834               | -1.016647 | -1.178768 |
| 8             | 1             | 0           | -4.989834               | -0.030567 | -1.455300 |
| 9             | 6             | 0           | -5.430071               | -2.130994 | -1.450197 |
| 10            | 6             | 0           | -5.014206               | -3.427970 | -1.112728 |
| 11            | 1             | 0           | -5.648986               | -4.277878 | -1.333292 |
| 12            | 6             | 0           | -3.791939               | -3.609846 | -0.493100 |
| 13            | 1             | 0           | -3.436686               | -4.593354 | -0.207984 |
| 14            | 6             | 0           | 0.088946                | -1.777344 | 1.331786  |
| 15            | 6             | 0           | 0.534011                | -0.727191 | 2.165517  |
| 16            | 6             | 0           | 1.731251                | -0.870514 | 2.889536  |
| 17            | 1             | 0           | 2.045261                | -0.062288 | 3.538638  |
| 18            | 6             | 0           | 2.479278                | -2.037883 | 2.787631  |
| 19            | 1             | 0           | 3.399424                | -2.149679 | 3.348543  |
| 20            | 6             | 0           | 2.027366                | -3.077489 | 1.961313  |
| 21            | 1             | 0           | 2.603117                | -3.993960 | 1.890087  |
| 22            | 6             | 0           | 0.851093                | -2.955055 | 1.232458  |
| 23            | 1             | 0           | 0.494248                | -3.755515 | 0.598368  |
| 24            | 16            | 0           | 2.114912                | 1.666510  | -1.594674 |
| 25            | 6             | 0           | 3.833833                | 1.020920  | -1.733610 |
| 26            | 1             | 0           | 4.502335                | 1.550042  | -1.047386 |
| 27            | 1             | 0           | 4.182945                | 1.186652  | -2.753556 |
| 28            | 6             | 0           | 3.835652                | -0.473628 | -1.409780 |
| 29            | 1             | 0           | 3.220795                | -0.996210 | -2.144731 |
| 30            | 6             | 0           | 5.243574                | -1.053813 | -1.421893 |
| 31            | 8             | 0           | 5.851142                | -1.390746 | -0.435452 |
| 32            | 8             | 0           | 5.736403                | -1.118214 | -2.670708 |
| 33            | 7             | 0           | 3.223398                | -0.668981 | -0.067266 |
| 34            | 1             | 0           | 3.050936                | -1.658791 | 0.106642  |
| 35            | 1             | 0           | 3.899907                | -0.387869 | 0.643864  |
| 36            | 16            | 0           | -3.205226               | 1.958142  | -0.908846 |
| 37            | 6             | 0           | -2.103497               | 3.393867  | -0.568764 |
| 38            | 1             | 0           | -1.285954               | 3.407306  | -1.294299 |
| 39            | 1             | 0           | -2.727555               | 4.273354  | -0.737015 |
| 40            | 6             | 0           | -1.545140               | 3.491204  | 0.861075  |
| 41            | 1             | 0           | -2.313119               | 3.127499  | 1.553014  |
| 42            | 7             | 0           | -1.265872               | 4.888200  | 1.197839  |
| 43            | 1             | 0           | -0.794051               | 4.927596  | 2.097015  |
| 44            | 6             | 0           | -0.307583               | 2.589427  | 1.081136  |
| 45            | 8             | 0           | -0.280327               | 1.486939  | 0.341778  |

|                                                        |   |   |           |           |           |    |    |   |           |           |           |
|--------------------------------------------------------|---|---|-----------|-----------|-----------|----|----|---|-----------|-----------|-----------|
| 46                                                     | 8 | 0 | 0.572749  | 2.876406  | 1.869508  | 46 | 1  | 0 | -1.106668 | -3.502356 | -0.358864 |
| 47                                                     | 1 | 0 | -6.391075 | -1.989174 | -1.933887 | 47 | 1  | 0 | 0.498847  | -4.110280 | -0.679664 |
| 48                                                     | 1 | 0 | 6.643279  | -1.459251 | -2.624499 | 48 | 8  | 0 | -1.757486 | -2.557874 | 2.058939  |
| 49                                                     | 1 | 0 | -0.608928 | 5.275997  | 0.524934  | 49 | 8  | 0 | -0.156983 | -3.780583 | 2.998009  |
| 50                                                     | 1 | 0 | -0.120116 | 0.111238  | 2.363051  | 50 | 1  | 0 | 2.010960  | -2.977602 | 2.250846  |
| -----                                                  |   |   |           |           |           | 51 | 17 | 0 | 0.289477  | 1.499272  | -2.453768 |
| HF=-2270.6638096\ZeroPoint=0.3524457\Thermal=0.3834775 |   |   |           |           |           | 52 | 1  | 0 | 2.505217  | -2.941155 | 0.643671  |

G = 15.9 kcal mol<sup>-1</sup>

| -----  |        |        |                         |           |           |
|--------|--------|--------|-------------------------|-----------|-----------|
| Center | Atomic | Atomic | Coordinates (Angstroms) |           |           |
| Number | Number | Type   | X                       | Y         | Z         |
| -----  |        |        |                         |           |           |
| 1      | 46     | 0      | -1.067929               | -0.139817 | -1.016747 |
| 2      | 46     | 0      | 1.234642                | 1.503499  | -0.229723 |
| 3      | 7      | 0      | -2.024543               | 1.314182  | 0.151164  |
| 4      | 7      | 0      | -3.145170               | 1.002890  | 0.653989  |
| 5      | 6      | 0      | -3.583694               | -0.258097 | 0.271408  |
| 6      | 6      | 0      | -2.736705               | -1.091591 | -0.514890 |
| 7      | 6      | 0      | -3.273570               | -2.295408 | -0.978661 |
| 8      | 1      | 0      | -2.692947               | -2.919989 | -1.647641 |
| 9      | 6      | 0      | -4.562801               | -2.695004 | -0.611057 |
| 10     | 6      | 0      | -5.353269               | -1.893190 | 0.215189  |
| 11     | 1      | 0      | -6.346642               | -2.217893 | 0.500955  |
| 12     | 6      | 0      | -4.868566               | -0.666254 | 0.651751  |
| 13     | 1      | 0      | -5.468510               | -0.004887 | 1.265507  |
| 14     | 6      | 0      | -1.505913               | 2.597006  | 0.481448  |
| 15     | 6      | 0      | -0.115148               | 2.822332  | 0.432529  |
| 16     | 6      | 0      | 0.340348                | 4.090273  | 0.824696  |
| 17     | 1      | 0      | 1.405235                | 4.291302  | 0.832516  |
| 18     | 6      | 0      | -0.540230               | 5.100684  | 1.197898  |
| 19     | 1      | 0      | -0.153031               | 6.075689  | 1.474785  |
| 20     | 6      | 0      | -1.918930               | 4.865449  | 1.210115  |
| 21     | 1      | 0      | -2.609217               | 5.654025  | 1.486703  |
| 22     | 6      | 0      | -2.399450               | 3.616076  | 0.863163  |
| 23     | 1      | 0      | -3.460761               | 3.406031  | 0.869841  |
| 24     | 16     | 0      | 2.335882                | 1.436536  | 1.814673  |
| 25     | 6      | 0      | 3.359236                | -0.048006 | 1.459184  |
| 26     | 1      | 0      | 2.781279                | -0.950127 | 1.669434  |
| 27     | 1      | 0      | 4.218724                | -0.048876 | 2.135791  |
| 28     | 6      | 0      | 3.854673                | -0.102150 | 0.003882  |
| 29     | 1      | 0      | 4.556523                | 0.714569  | -0.160682 |
| 30     | 6      | 0      | 4.546216                | -1.428477 | -0.252489 |
| 31     | 8      | 0      | 5.807332                | -1.314870 | -0.667907 |
| 32     | 8      | 0      | 4.013643                | -2.519399 | -0.096897 |
| 33     | 7      | 0      | 2.729700                | 0.064429  | -0.940634 |
| 34     | 1      | 0      | 3.048164                | 0.360560  | -1.860099 |
| 35     | 1      | 0      | 2.177417                | -0.790248 | -1.088081 |
| 36     | 1      | 0      | -4.951811               | -3.639131 | -0.977212 |
| 37     | 1      | 0      | 6.171623                | -2.203646 | -0.812673 |
| 38     | 1      | 0      | -1.928545               | -2.002329 | 1.267776  |
| 39     | 7      | 0      | 1.750155                | -3.250593 | 1.300194  |
| 40     | 6      | 0      | 0.400203                | -2.679988 | 0.951250  |
| 41     | 1      | 0      | 1.700907                | -4.271535 | 1.310449  |
| 42     | 6      | 0      | -0.061626               | -3.203392 | -0.427646 |
| 43     | 1      | 0      | 0.504633                | -1.590843 | 0.925515  |
| 44     | 6      | 0      | -0.535285               | -3.060127 | 2.103832  |
| 45     | 16     | 0      | 0.154913                | -2.005513 | -1.800734 |

HF=-2731.5214215\ZeroPoint=0.363346\Thermal=0.3962762

| -----  |        |        |                         |           |           |
|--------|--------|--------|-------------------------|-----------|-----------|
| Center | Atomic | Atomic | Coordinates (Angstroms) |           |           |
| Number | Number | Type   | X                       | Y         | Z         |
| -----  |        |        |                         |           |           |
| 1      | 46     | 0      | 1.105374                | -0.376047 | 0.864967  |
| 2      | 46     | 0      | -1.086031               | 1.495815  | 0.358088  |
| 3      | 7      | 0      | 2.143768                | 1.104312  | -0.202600 |
| 4      | 7      | 0      | 3.278171                | 0.784013  | -0.668779 |
| 5      | 6      | 0      | 3.659424                | -0.517064 | -0.374247 |
| 6      | 6      | 0      | 2.701597                | -1.465940 | 0.094979  |
| 7      | 6      | 0      | 3.181375                | -2.712207 | 0.524582  |
| 8      | 1      | 0      | 2.488381                | -3.437298 | 0.932170  |
| 9      | 6      | 0      | 4.530895                | -3.035160 | 0.418020  |
| 10     | 6      | 0      | 5.438488                | -2.116801 | -0.119775 |
| 11     | 1      | 0      | 6.484942                | -2.382575 | -0.214167 |
| 12     | 6      | 0      | 5.007325                | -0.856981 | -0.518099 |
| 13     | 1      | 0      | 5.697982                | -0.117591 | -0.904699 |
| 14     | 6      | 0      | 1.700511                | 2.432358  | -0.430277 |
| 15     | 6      | 0      | 0.329811                | 2.747986  | -0.297390 |
| 16     | 6      | 0      | -0.047452               | 4.070811  | -0.580397 |
| 17     | 1      | 0      | -1.093543               | 4.346522  | -0.520059 |
| 18     | 6      | 0      | 0.884354                | 5.039988  | -0.933117 |
| 19     | 1      | 0      | 0.555448                | 6.055439  | -1.127549 |
| 20     | 6      | 0      | 2.241599                | 4.712047  | -1.034200 |
| 21     | 1      | 0      | 2.971907                | 5.467654  | -1.299301 |
| 22     | 6      | 0      | 2.646603                | 3.414774  | -0.791540 |
| 23     | 1      | 0      | 3.688173                | 3.134211  | -0.868383 |
| 24     | 16     | 0      | -2.328582               | 1.771113  | -1.575997 |
| 25     | 6      | 0      | -3.436878               | 0.328072  | -1.328386 |
| 26     | 1      | 0      | -2.945632               | -0.585831 | -1.668660 |
| 27     | 1      | 0      | -4.323326               | 0.468878  | -1.953556 |
| 28     | 6      | 0      | -3.867813               | 0.174735  | 0.136236  |
| 29     | 1      | 0      | -4.469324               | 1.038345  | 0.417963  |
| 30     | 6      | 0      | -4.691685               | -1.089564 | 0.313059  |
| 31     | 8      | 0      | -5.853815               | -0.885155 | 0.940480  |
| 32     | 8      | 0      | -4.348834               | -2.197719 | -0.066292 |
| 33     | 7      | 0      | -2.688606               | 0.144261  | 1.038920  |
| 34     | 1      | 0      | -2.945718               | 0.398573  | 1.989515  |
| 35     | 1      | 0      | -2.235302               | -0.772940 | 1.107516  |
| 36     | 1      | 0      | 4.878382                | -4.009017 | 0.743814  |
| 37     | 1      | 0      | -6.317617               | -1.734594 | 1.020978  |
| 38     | 1      | 0      | 1.690107                | -1.589207 | -0.748852 |
| 39     | 7      | 0      | -2.158208               | -3.214402 | -1.526556 |
| 40     | 6      | 0      | -0.928260               | -2.525406 | -0.989160 |
| 41     | 1      | 0      | -2.124108               | -4.219446 | -1.359812 |
| 42     | 6      | 0      | -0.335450               | -3.234593 | 0.239239  |
| 43     | 1      | 0      | -1.232445               | -1.510845 | -0.734345 |

|                                                        |    |   |           |           |           |       |    |   |           |           |           |
|--------------------------------------------------------|----|---|-----------|-----------|-----------|-------|----|---|-----------|-----------|-----------|
| 44                                                     | 6  | 0 | 0.018217  | -2.383874 | -2.221893 | 42    | 6  | 0 | 0.461231  | -3.235915 | -0.275388 |
| 45                                                     | 16 | 0 | -0.155765 | -2.156249 | 1.719175  | 43    | 1  | 0 | 1.384753  | -1.574139 | 0.773635  |
| 46                                                     | 1  | 0 | 0.621614  | -3.683652 | -0.030553 | 44    | 6  | 0 | 0.459555  | -2.759908 | 2.296961  |
| 47                                                     | 1  | 0 | -0.990696 | -4.049503 | 0.562539  | 45    | 16 | 0 | 0.194468  | -2.083713 | -1.683621 |
| 48                                                     | 8  | 0 | 1.189576  | -1.971264 | -1.996688 | 46    | 1  | 0 | -0.495080 | -3.617000 | 0.078981  |
| 49                                                     | 8  | 0 | -0.490798 | -2.669471 | -3.315668 | 47    | 1  | 0 | 1.006863  | -4.082562 | -0.704803 |
| 50                                                     | 1  | 0 | -2.044155 | -3.063268 | -2.562375 | 48    | 8  | 0 | -0.738877 | -2.470472 | 2.290069  |
| 51                                                     | 17 | 0 | 0.078941  | 1.170292  | 2.479724  | 49    | 8  | 0 | 1.227859  | -3.118764 | 3.233664  |
| 52                                                     | 1  | 0 | -3.028197 | -2.833503 | -1.116209 | 50    | 1  | 0 | 2.442961  | -3.293797 | 2.288243  |
| -----                                                  |    |   |           |           |           | 51    | 17 | 0 | -0.318273 | 1.151084  | -2.432830 |
| HF=-2731.4958011\ZeroPoint=0.3587658\Thermal=0.3910296 |    |   |           |           |           | 52    | 1  | 0 | 3.345443  | -2.729769 | 0.811212  |
| -----                                                  |    |   |           |           |           | ----- |    |   |           |           |           |

G = 25.1 kcal mol<sup>-1</sup>

| Center Number | Atomic Number | Atomic Type | Coordinates (Angstroms) |           |           |
|---------------|---------------|-------------|-------------------------|-----------|-----------|
|               |               |             | X                       | Y         | Z         |
| 1             | 46            | 0           | -1.103718               | -0.411566 | -0.708962 |
| 2             | 46            | 0           | 0.950248                | 1.528217  | -0.362222 |
| 3             | 7             | 0           | -2.248544               | 1.043836  | 0.292787  |
| 4             | 7             | 0           | -3.421969               | 0.719951  | 0.635963  |
| 5             | 6             | 0           | -3.769068               | -0.595829 | 0.329332  |
| 6             | 6             | 0           | -2.799139               | -1.625459 | 0.209766  |
| 7             | 6             | 0           | -3.210071               | -2.893351 | -0.214952 |
| 8             | 1             | 0           | -2.480794               | -3.687259 | -0.300268 |
| 9             | 6             | 0           | -4.549134               | -3.146870 | -0.488597 |
| 10            | 6             | 0           | -5.502771               | -2.138840 | -0.314817 |
| 11            | 1             | 0           | -6.548338               | -2.345276 | -0.511901 |
| 12            | 6             | 0           | -5.120567               | -0.869511 | 0.104025  |
| 13            | 1             | 0           | -5.843144               | -0.071824 | 0.223029  |
| 14            | 6             | 0           | -1.835960               | 2.374488  | 0.548651  |
| 15            | 6             | 0           | -0.478011               | 2.724018  | 0.376249  |
| 16            | 6             | 0           | -0.123795               | 4.052155  | 0.667763  |
| 17            | 1             | 0           | 0.911449                | 4.356652  | 0.572916  |
| 18            | 6             | 0           | -1.064450               | 4.988424  | 1.078272  |
| 19            | 1             | 0           | -0.752982               | 6.007073  | 1.284046  |
| 20            | 6             | 0           | -2.408704               | 4.623821  | 1.228349  |
| 21            | 1             | 0           | -3.144279               | 5.353811  | 1.545189  |
| 22            | 6             | 0           | -2.792288               | 3.324514  | 0.969148  |
| 23            | 1             | 0           | -3.822800               | 3.017061  | 1.080831  |
| 24            | 16            | 0           | 2.242101                | 1.848818  | 1.528228  |
| 25            | 6             | 0           | 3.473557                | 0.529440  | 1.184793  |
| 26            | 1             | 0           | 3.093029                | -0.439732 | 1.515409  |
| 27            | 1             | 0           | 4.370616                | 0.745646  | 1.771343  |
| 28            | 6             | 0           | 3.833110                | 0.465632  | -0.305544 |
| 29            | 1             | 0           | 4.299650                | 1.405714  | -0.597902 |
| 30            | 6             | 0           | 4.804448                | -0.677685 | -0.549202 |
| 31            | 8             | 0           | 5.969302                | -0.279440 | -1.075142 |
| 32            | 8             | 0           | 4.573668                | -1.843508 | -0.286768 |
| 33            | 7             | 0           | 2.607092                | 0.299231  | -1.123296 |
| 34            | 1             | 0           | 2.775936                | 0.540625  | -2.096971 |
| 35            | 1             | 0           | 2.245169                | -0.659345 | -1.131684 |
| 36            | 1             | 0           | -4.857397               | -4.133628 | -0.812858 |
| 37            | 1             | 0           | 6.541999                | -1.056432 | -1.181000 |
| 38            | 1             | 0           | -1.850916               | -1.575734 | 0.809812  |
| 39            | 7             | 0           | 2.555190                | -3.264378 | 1.192257  |
| 40            | 6             | 0           | 1.214547                | -2.640686 | 0.918230  |
| 41            | 1             | 0           | 2.610078                | -4.219782 | 0.844802  |

HF=-2731.5027378\ZeroPoint=0.3604875\Thermal=0.3938215

G = 6.8 kcal mol<sup>-1</sup>

| Center Number | Atomic Number | Atomic Type | Coordinates (Angstroms) |           |           |
|---------------|---------------|-------------|-------------------------|-----------|-----------|
|               |               |             | X                       | Y         | Z         |
| 1             | 46            | 0           | -1.771005               | 0.470925  | -0.776148 |
| 2             | 46            | 0           | 1.727967                | 0.458151  | -0.866548 |
| 3             | 7             | 0           | -0.937947               | 2.005557  | 0.434919  |
| 4             | 7             | 0           | -1.539294               | 2.249221  | 1.519195  |
| 5             | 6             | 0           | -2.670326               | 1.465876  | 1.722564  |
| 6             | 6             | 0           | -3.073484               | 0.532608  | 0.730010  |
| 7             | 6             | 0           | -4.276194               | -0.140400 | 0.946385  |
| 8             | 1             | 0           | -4.659846               | -0.812989 | 0.188972  |
| 9             | 6             | 0           | -5.013926               | 0.064713  | 2.118926  |
| 10            | 6             | 0           | -4.580688               | 0.959685  | 3.099568  |
| 11            | 1             | 0           | -5.163848               | 1.109907  | 4.000332  |
| 12            | 6             | 0           | -3.407121               | 1.674412  | 2.896262  |
| 13            | 1             | 0           | -3.052995               | 2.403676  | 3.615654  |
| 14            | 6             | 0           | 0.140864                | 2.889888  | 0.123829  |
| 15            | 6             | 0           | 1.316113                | 2.393870  | -0.458092 |
| 16            | 6             | 0           | 2.334574                | 3.320019  | -0.727338 |
| 17            | 1             | 0           | 3.262831                | 2.980936  | -1.177279 |
| 18            | 6             | 0           | 2.181058                | 4.680044  | -0.461031 |
| 19            | 1             | 0           | 2.980011                | 5.371467  | -0.707013 |
| 20            | 6             | 0           | 0.995955                | 5.151223  | 0.106768  |
| 21            | 1             | 0           | 0.863839                | 6.208136  | 0.307114  |
| 22            | 6             | 0           | -0.020253               | 4.256999  | 0.405834  |
| 23            | 1             | 0           | -0.950324               | 4.597349  | 0.843421  |
| 24            | 16            | 0           | 2.591958                | -1.781523 | -1.326335 |
| 25            | 6             | 0           | 3.538559                | -2.005497 | 0.241181  |
| 26            | 1             | 0           | 4.601048                | -1.869283 | 0.017300  |
| 27            | 1             | 0           | 3.406494                | -3.016026 | 0.627011  |
| 28            | 6             | 0           | 3.116766                | -0.995927 | 1.323056  |
| 29            | 1             | 0           | 2.114981                | -1.248445 | 1.676113  |
| 30            | 6             | 0           | 4.079415                | -1.048561 | 2.502616  |
| 31            | 8             | 0           | 3.930517                | -2.188475 | 3.204621  |
| 32            | 8             | 0           | 4.887827                | -0.194021 | 2.765813  |
| 33            | 7             | 0           | 3.065580                | 0.373780  | 0.759821  |
| 34            | 1             | 0           | 2.792167                | 1.046061  | 1.473317  |
| 35            | 1             | 0           | 4.000254                | 0.654004  | 0.463776  |
| 36            | 1             | 0           | -5.943921               | -0.476512 | 2.259992  |
| 37            | 1             | 0           | 4.586332                | -2.193297 | 3.919065  |
| 38            | 1             | 0           | -1.487950               | -3.033250 | 2.009173  |
| 39            | 7             | 0           | -0.253758               | -2.907099 | -1.597605 |

|                                                        |    |   |           |           |           |       |    |   |           |           |           |
|--------------------------------------------------------|----|---|-----------|-----------|-----------|-------|----|---|-----------|-----------|-----------|
| 40                                                     | 6  | 0 | -1.016277 | -2.792424 | -0.331792 | 38    | 1  | 0 | -1.963079 | -0.962632 | 1.007273  |
| 41                                                     | 1  | 0 | -0.283959 | -3.865185 | -1.952133 | 39    | 7  | 0 | 1.108845  | -3.596068 | -0.226671 |
| 42                                                     | 6  | 0 | -2.526756 | -2.655821 | -0.623621 | 40    | 6  | 0 | -0.074588 | -2.702165 | -0.000466 |
| 43                                                     | 1  | 0 | -0.669897 | -1.870856 | 0.148289  | 41    | 1  | 0 | 1.482200  | -3.779385 | 0.725018  |
| 44                                                     | 6  | 0 | -0.709328 | -4.002534 | 0.538505  | 42    | 6  | 0 | -1.418278 | -3.241275 | -0.517364 |
| 45                                                     | 16 | 0 | -2.856389 | -1.336700 | -1.852674 | 43    | 1  | 0 | 0.172352  | -1.791713 | -0.545458 |
| 46                                                     | 1  | 0 | -3.045183 | -2.449898 | 0.315248  | 44    | 6  | 0 | -0.048943 | -2.292703 | 1.492910  |
| 47                                                     | 1  | 0 | -2.913200 | -3.598010 | -1.024285 | 45    | 16 | 0 | -2.134030 | -2.175028 | -1.844399 |
| 48                                                     | 8  | 0 | -1.083202 | -3.892876 | 1.828655  | 46    | 1  | 0 | -2.114084 | -3.340448 | 0.317962  |
| 49                                                     | 8  | 0 | -0.204520 | -5.007455 | 0.116292  | 47    | 1  | 0 | -1.304048 | -4.236370 | -0.957722 |
| 50                                                     | 1  | 0 | 0.773420  | -2.626026 | -1.443129 | 48    | 8  | 0 | -0.988661 | -1.537458 | 1.884017  |
| 51                                                     | 17 | 0 | 0.038348  | 0.459713  | -2.524706 | 49    | 8  | 0 | 0.916842  | -2.694006 | 2.162742  |
| 52                                                     | 1  | 0 | -0.692281 | -2.249447 | -2.271951 | 50    | 1  | 0 | 1.825518  | -3.002213 | -0.771336 |
| -----                                                  |    |   |           |           |           | 51    | 17 | 0 | -0.195117 | 0.549074  | -2.588965 |
| HF=-2731.5330215\ZeroPoint=0.3624388\Thermal=0.3956756 |    |   |           |           |           | 52    | 1  | 0 | 0.891368  | -4.454436 | -0.727425 |
| -----                                                  |    |   |           |           |           | ----- |    |   |           |           |           |

G = 31.9 kcal mol<sup>-1</sup>

| Center Number | Atomic Number | Atomic Type | Coordinates (Angstroms) |           |           |
|---------------|---------------|-------------|-------------------------|-----------|-----------|
|               |               |             | X                       | Y         | Z         |
| 1             | 46            | 0           | -1.741552               | -0.087769 | -0.835303 |
| 2             | 46            | 0           | 1.469719                | 0.607945  | -0.881569 |
| 3             | 7             | 0           | -1.474821               | 1.665923  | 0.368833  |
| 4             | 7             | 0           | -2.319006               | 1.845625  | 1.291861  |
| 5             | 6             | 0           | -3.278444               | 0.841775  | 1.400037  |
| 6             | 6             | 0           | -3.114093               | -0.403354 | 0.728901  |
| 7             | 6             | 0           | -4.177099               | -1.315392 | 0.790008  |
| 8             | 1             | 0           | -4.096861               | -2.253438 | 0.255742  |
| 9             | 6             | 0           | -5.322204               | -1.032859 | 1.530947  |
| 10            | 6             | 0           | -5.435985               | 0.174589  | 2.225447  |
| 11            | 1             | 0           | -6.326655               | 0.383133  | 2.806806  |
| 12            | 6             | 0           | -4.414168               | 1.116494  | 2.164622  |
| 13            | 1             | 0           | -4.490666               | 2.070005  | 2.672812  |
| 14            | 6             | 0           | -0.527172               | 2.711862  | 0.187554  |
| 15            | 6             | 0           | 0.748698                | 2.412169  | -0.319573 |
| 16            | 6             | 0           | 1.648967                | 3.481905  | -0.444596 |
| 17            | 1             | 0           | 2.646536                | 3.301077  | -0.833518 |
| 18            | 6             | 0           | 1.290956                | 4.788104  | -0.120843 |
| 19            | 1             | 0           | 2.005733                | 5.592684  | -0.257081 |
| 20            | 6             | 0           | 0.007732                | 5.064063  | 0.360200  |
| 21            | 1             | 0           | -0.282514               | 6.080189  | 0.600178  |
| 22            | 6             | 0           | -0.896102               | 4.029331  | 0.521404  |
| 23            | 1             | 0           | -1.894726               | 4.216602  | 0.893558  |
| 24            | 16            | 0           | 2.762443                | -1.359681 | -1.581472 |
| 25            | 6             | 0           | 4.049726                | -1.174613 | -0.271155 |
| 26            | 1             | 0           | 4.814716                | -0.477236 | -0.625863 |
| 27            | 1             | 0           | 4.534810                | -2.134139 | -0.088076 |
| 28            | 6             | 0           | 3.452543                | -0.652474 | 1.043394  |
| 29            | 1             | 0           | 2.736387                | -1.375329 | 1.440583  |
| 30            | 6             | 0           | 4.548283                | -0.437147 | 2.078337  |
| 31            | 8             | 0           | 5.047092                | -1.608186 | 2.516663  |
| 32            | 8             | 0           | 4.947907                | 0.641677  | 2.442594  |
| 33            | 7             | 0           | 2.730445                | 0.622876  | 0.804469  |
| 34            | 1             | 0           | 2.156777                | 0.850944  | 1.613944  |
| 35            | 1             | 0           | 3.405607                | 1.384502  | 0.730135  |
| 36            | 1             | 0           | -6.127082               | -1.757772 | 1.574514  |
| 37            | 1             | 0           | 5.751786                | -1.415592 | 3.154269  |

HF=-2731.4927577\ZeroPoint=0.3583819\Thermal=0.3906686

G = 28.0 kcal mol<sup>-1</sup>

| Center Number | Atomic Number | Atomic Type | Coordinates (Angstroms) |           |           |
|---------------|---------------|-------------|-------------------------|-----------|-----------|
|               |               |             | X                       | Y         | Z         |
| 1             | 46            | 0           | -1.798574               | -0.225975 | -0.662666 |
| 2             | 46            | 0           | 1.343204                | 0.595865  | -0.875101 |
| 3             | 7             | 0           | -1.677903               | 1.685315  | 0.332624  |
| 4             | 7             | 0           | -2.656678               | 1.941793  | 1.082352  |
| 5             | 6             | 0           | -3.536964               | 0.851778  | 1.240072  |
| 6             | 6             | 0           | -3.049489               | -0.469826 | 1.389724  |
| 7             | 6             | 0           | -3.978887               | -1.513978 | 1.516337  |
| 8             | 1             | 0           | -3.620872               | -2.527897 | 1.638702  |
| 9             | 6             | 0           | -5.341360               | -1.256550 | 1.501951  |
| 10            | 6             | 0           | -5.802787               | 0.060697  | 1.386940  |
| 11            | 1             | 0           | -6.868251               | 0.260057  | 1.386685  |
| 12            | 6             | 0           | -4.908538               | 1.117001  | 1.271112  |
| 13            | 1             | 0           | -5.250854               | 2.139847  | 1.175158  |
| 14            | 6             | 0           | -0.723704               | 2.718202  | 0.149353  |
| 15            | 6             | 0           | 0.569648                | 2.378125  | -0.285894 |
| 16            | 6             | 0           | 1.495390                | 3.433280  | -0.377457 |
| 17            | 1             | 0           | 2.511970                | 3.226255  | -0.697569 |
| 18            | 6             | 0           | 1.145195                | 4.750697  | -0.102388 |
| 19            | 1             | 0           | 1.883903                | 5.537970  | -0.209226 |
| 20            | 6             | 0           | -0.159671               | 5.063883  | 0.296862  |
| 21            | 1             | 0           | -0.441333               | 6.090620  | 0.498468  |
| 22            | 6             | 0           | -1.088761               | 4.051253  | 0.430920  |
| 23            | 1             | 0           | -2.101380               | 4.264487  | 0.746585  |
| 24            | 16            | 0           | 2.817694                | -1.160718 | -1.698860 |
| 25            | 6             | 0           | 4.146608                | -0.753109 | -0.483196 |
| 26            | 1             | 0           | 4.673274                | 0.137455  | -0.837331 |
| 27            | 1             | 0           | 4.864261                | -1.573058 | -0.435801 |
| 28            | 6             | 0           | 3.577097                | -0.498190 | 0.919600  |
| 29            | 1             | 0           | 3.173486                | -1.428399 | 1.322906  |
| 30            | 6             | 0           | 4.675318                | -0.009649 | 1.851202  |
| 31            | 8             | 0           | 5.565716                | -0.982854 | 2.117884  |
| 32            | 8             | 0           | 4.770096                | 1.116927  | 2.276149  |
| 33            | 7             | 0           | 2.477341                | 0.509795  | 0.888599  |
| 34            | 1             | 0           | 1.774957                | 0.257985  | 1.588866  |
| 35            | 1             | 0           | 2.850045                | 1.422955  | 1.150880  |



|    |    |   |           |           |           |
|----|----|---|-----------|-----------|-----------|
| 36 | 1  | 0 | -6.049272 | -2.071029 | 1.596489  |
| 37 | 1  | 0 | 6.251889  | -0.611192 | 2.693194  |
| 38 | 1  | 0 | -1.994169 | -0.650714 | 1.631372  |
| 39 | 7  | 0 | 1.302230  | -3.627091 | -0.490419 |
| 40 | 6  | 0 | 0.244591  | -2.705559 | 0.039285  |
| 41 | 1  | 0 | 1.753037  | -4.000303 | 0.371938  |
| 42 | 6  | 0 | -1.189116 | -3.233962 | -0.085247 |
| 43 | 1  | 0 | 0.346231  | -1.794653 | -0.541105 |
| 44 | 6  | 0 | 0.681624  | -2.319066 | 1.485189  |
| 45 | 16 | 0 | -2.124727 | -2.396162 | -1.437938 |
| 46 | 1  | 0 | -1.697985 | -3.097099 | 0.868441  |
| 47 | 1  | 0 | -1.208756 | -4.306249 | -0.305522 |
| 48 | 8  | 0 | 0.085556  | -1.330783 | 1.959301  |
| 49 | 8  | 0 | 1.621590  | -3.001755 | 1.957861  |
| 50 | 1  | 0 | 2.004576  | -2.996678 | -0.984623 |
| 51 | 17 | 0 | -0.409067 | 0.352459  | -2.509209 |
| 52 | 1  | 0 | 0.963203  | -4.348165 | -1.123722 |

HF=-2731.4999561\ZeroPoint=0.362073\Thermal=0.3952248

G = 4.9 kcal mol<sup>-1</sup>

| Center Number | Atomic Number | Atomic Type | Coordinates (Angstroms) |           |           |
|---------------|---------------|-------------|-------------------------|-----------|-----------|
|               |               |             | X                       | Y         | Z         |
| 1             | 46            | 0           | -1.287371               | -0.381158 | -0.762308 |
| 2             | 46            | 0           | 1.253662                | 1.024142  | -0.333532 |
| 3             | 7             | 0           | -2.067075               | 1.406830  | -0.005923 |
| 4             | 7             | 0           | -3.274605               | 1.383938  | 0.384834  |
| 5             | 6             | 0           | -3.890322               | 0.153428  | 0.187833  |
| 6             | 6             | 0           | -3.139609               | -0.942449 | -0.321787 |
| 7             | 6             | 0           | -3.804706               | -2.152019 | -0.533863 |
| 8             | 1             | 0           | -3.270652               | -2.987671 | -0.969921 |
| 9             | 6             | 0           | -5.161839               | -2.280991 | -0.215637 |
| 10            | 6             | 0           | -5.881211               | -1.203864 | 0.310435  |
| 11            | 1             | 0           | -6.932150               | -1.315954 | 0.549365  |
| 12            | 6             | 0           | -5.248369               | 0.017764  | 0.508229  |
| 13            | 1             | 0           | -5.784281               | 0.877146  | 0.894000  |
| 14            | 6             | 0           | -1.339512               | 2.612150  | 0.175277  |
| 15            | 6             | 0           | 0.074122                | 2.588065  | 0.142332  |
| 16            | 6             | 0           | 0.726283                | 3.809865  | 0.386534  |
| 17            | 1             | 0           | 1.808794                | 3.835416  | 0.402099  |
| 18            | 6             | 0           | 0.027037                | 4.991569  | 0.603534  |
| 19            | 1             | 0           | 0.571885                | 5.915389  | 0.767746  |
| 20            | 6             | 0           | -1.372327               | 4.993883  | 0.603153  |
| 21            | 1             | 0           | -1.922000               | 5.915215  | 0.757750  |
| 22            | 6             | 0           | -2.051427               | 3.808797  | 0.398978  |
| 23            | 1             | 0           | -3.132719               | 3.781169  | 0.397357  |
| 24            | 16            | 0           | 2.495022                | 1.163288  | 1.665797  |
| 25            | 6             | 0           | 3.882049                | 0.006824  | 1.227632  |
| 26            | 1             | 0           | 3.711534                | -0.951462 | 1.719108  |
| 27            | 1             | 0           | 4.811288                | 0.436191  | 1.598977  |
| 28            | 6             | 0           | 3.986735                | -0.209321 | -0.289782 |
| 29            | 1             | 0           | 4.321501                | 0.723689  | -0.752381 |
| 30            | 6             | 0           | 5.021706                | -1.280651 | -0.616111 |
| 31            | 8             | 0           | 6.255653                | -0.912947 | -0.198728 |
| 32            | 8             | 0           | 4.792804                | -2.321244 | -1.175359 |
| 33            | 7             | 0           | 2.667507                | -0.544800 | -0.847828 |

|    |    |   |           |           |           |
|----|----|---|-----------|-----------|-----------|
| 34 | 1  | 0 | 2.703452  | -0.644401 | -1.859907 |
| 35 | 1  | 0 | 2.337607  | -1.442880 | -0.491881 |
| 36 | 1  | 0 | -5.662132 | -3.227655 | -0.391167 |
| 37 | 1  | 0 | 6.868884  | -1.627850 | -0.427527 |
| 38 | 1  | 0 | -1.692428 | -1.345415 | 1.174059  |
| 39 | 7  | 0 | -1.618349 | -2.027748 | 1.988546  |
| 40 | 6  | 0 | -0.439614 | -2.920253 | 1.711092  |
| 41 | 6  | 0 | -0.568532 | -3.552110 | 0.317189  |
| 42 | 1  | 0 | -0.442892 | -3.707450 | 2.471762  |
| 43 | 6  | 0 | 0.842819  | -2.096806 | 1.897162  |
| 44 | 16 | 0 | -0.315112 | -2.464968 | -1.150387 |
| 45 | 1  | 0 | -1.531689 | -4.071866 | 0.265726  |
| 46 | 1  | 0 | 0.213353  | -4.309222 | 0.244682  |
| 47 | 8  | 0 | 0.605268  | -0.963195 | 2.532868  |
| 48 | 8  | 0 | 1.908424  | -2.506390 | 1.507112  |
| 49 | 1  | 0 | -1.475923 | -1.479280 | 2.837884  |
| 50 | 17 | 0 | 0.229462  | 0.805898  | -2.490493 |
| 51 | 1  | 0 | -2.500746 | -2.539677 | 2.018219  |
| 52 | 1  | 0 | 1.341313  | -0.244697 | 2.376777  |

HF=-2731.539569\ZeroPoint=0.3623087\Thermal=0.3948098

G = 15.3 kcal mol<sup>-1</sup>

| Center Number | Atomic Number | Atomic Type | Coordinates (Angstroms) |           |           |
|---------------|---------------|-------------|-------------------------|-----------|-----------|
|               |               |             | X                       | Y         | Z         |
| 1             | 46            | 0           | 1.260824                | -0.429284 | 0.686050  |
| 2             | 46            | 0           | -1.291285               | 1.009469  | 0.374243  |
| 3             | 7             | 0           | 2.010735                | 1.388662  | -0.057106 |
| 4             | 7             | 0           | 3.218771                | 1.388098  | -0.451707 |
| 5             | 6             | 0           | 3.870271                | 0.177915  | -0.264432 |
| 6             | 6             | 0           | 3.139108                | -1.004816 | 0.051538  |
| 7             | 6             | 0           | 3.867420                | -2.158472 | 0.380658  |
| 8             | 1             | 0           | 3.332040                | -3.055588 | 0.666191  |
| 9             | 6             | 0           | 5.258587                | -2.161132 | 0.330368  |
| 10            | 6             | 0           | 5.957726                | -1.009771 | -0.051261 |
| 11            | 1             | 0           | 7.040320                | -1.024140 | -0.097651 |
| 12            | 6             | 0           | 5.268265                | 0.158445  | -0.349424 |
| 13            | 1             | 0           | 5.788977                | 1.072472  | -0.608406 |
| 14            | 6             | 0           | 1.285997                | 2.600021  | -0.179749 |
| 15            | 6             | 0           | -0.126342               | 2.586961  | -0.084337 |
| 16            | 6             | 0           | -0.774710               | 3.824213  | -0.252845 |
| 17            | 1             | 0           | -1.856323               | 3.859623  | -0.218280 |
| 18            | 6             | 0           | -0.073633               | 5.005558  | -0.460838 |
| 19            | 1             | 0           | -0.615324               | 5.939647  | -0.567099 |
| 20            | 6             | 0           | 1.325069                | 4.995424  | -0.528212 |
| 21            | 1             | 0           | 1.876124                | 5.916467  | -0.679039 |
| 22            | 6             | 0           | 1.999983                | 3.799498  | -0.395557 |
| 23            | 1             | 0           | 3.079583                | 3.763545  | -0.444904 |
| 24            | 16            | 0           | -2.585472               | 1.275456  | -1.562943 |
| 25            | 6             | 0           | -3.920450               | 0.040997  | -1.190373 |
| 26            | 1             | 0           | -3.709354               | -0.883206 | -1.728366 |
| 27            | 1             | 0           | -4.866755               | 0.451619  | -1.539533 |
| 28            | 6             | 0           | -4.011771               | -0.254418 | 0.313261  |
| 29            | 1             | 0           | -4.363216               | 0.646782  | 0.824412  |
| 30            | 6             | 0           | -5.018214               | -1.363737 | 0.598840  |
| 31            | 8             | 0           | -6.259655               | -1.019147 | 0.184807  |

|                                                        |    |   |           |           |           |       |    |   |           |           |           |
|--------------------------------------------------------|----|---|-----------|-----------|-----------|-------|----|---|-----------|-----------|-----------|
| 32                                                     | 8  | 0 | -4.763819 | -2.412652 | 1.131471  | 30    | 6  | 0 | 5.007290  | -1.205055 | -0.823719 |
| 33                                                     | 7  | 0 | -2.679385 | -0.589960 | 0.843808  | 31    | 8  | 0 | 6.249852  | -0.847083 | -0.425621 |
| 34                                                     | 1  | 0 | -2.710225 | -0.757945 | 1.846688  | 32    | 8  | 0 | 4.766118  | -2.232165 | -1.402852 |
| 35                                                     | 1  | 0 | -2.336057 | -1.456746 | 0.426718  | 33    | 7  | 0 | 2.632481  | -0.516920 | -0.921363 |
| 36                                                     | 1  | 0 | 5.803291  | -3.063262 | 0.585488  | 34    | 1  | 0 | 2.617296  | -0.700873 | -1.921833 |
| 37                                                     | 1  | 0 | -6.853370 | -1.757356 | 0.389772  | 35    | 1  | 0 | 2.337579  | -1.386975 | -0.473933 |
| 38                                                     | 1  | 0 | 2.158299  | -1.340775 | -0.839377 | 36    | 1  | 0 | -5.787272 | -3.112435 | -0.787257 |
| 39                                                     | 7  | 0 | 1.714897  | -2.062688 | -2.061729 | 37    | 1  | 0 | 6.857055  | -1.557014 | -0.684049 |
| 40                                                     | 6  | 0 | 0.483170  | -2.828090 | -1.782705 | 38    | 1  | 0 | -2.353970 | -1.208893 | 0.867742  |
| 41                                                     | 6  | 0 | 0.560492  | -3.529359 | -0.409015 | 39    | 7  | 0 | -1.475361 | -2.480726 | 2.325492  |
| 42                                                     | 1  | 0 | 0.353519  | -3.613902 | -2.538341 | 40    | 6  | 0 | -0.216208 | -3.047019 | 1.832255  |
| 43                                                     | 6  | 0 | -0.756086 | -1.942052 | -1.904255 | 41    | 6  | 0 | -0.387403 | -3.606469 | 0.399129  |
| 44                                                     | 16 | 0 | 0.342788  | -2.517272 | 1.119038  | 42    | 1  | 0 | 0.127344  | -3.890578 | 2.450243  |
| 45                                                     | 1  | 0 | 1.500161  | -4.089386 | -0.372331 | 43    | 6  | 0 | 0.931055  | -2.044977 | 1.885949  |
| 46                                                     | 1  | 0 | -0.254391 | -4.253073 | -0.364355 | 44    | 16 | 0 | -0.259529 | -2.470052 | -1.050844 |
| 47                                                     | 8  | 0 | -0.495201 | -0.769117 | -2.460680 | 45    | 1  | 0 | -1.331700 | -4.157642 | 0.369178  |
| 48                                                     | 8  | 0 | -1.843082 | -2.329642 | -1.539573 | 46    | 1  | 0 | 0.416883  | -4.320661 | 0.209909  |
| 49                                                     | 1  | 0 | 1.557390  | -1.359691 | -2.779139 | 47    | 8  | 0 | 0.590270  | -0.879917 | 2.420655  |
| 50                                                     | 17 | 0 | -0.107731 | 0.630600  | 2.450984  | 48    | 8  | 0 | 2.035944  | -2.326482 | 1.471742  |
| 51                                                     | 1  | 0 | 2.479093  | -2.670601 | -2.341223 | 49    | 1  | 0 | -1.318916 | -1.885293 | 3.131386  |
| 52                                                     | 1  | 0 | -1.258506 | -0.111560 | -2.329988 | 50    | 17 | 0 | -0.063840 | 0.635856  | -2.406784 |
| -----                                                  |    |   |           |           |           | 51    | 1  | 0 | -2.114307 | -3.220422 | 2.596892  |
| HF=-2731.5201777\ZeroPoint=0.3584339\Thermal=0.3905803 |    |   |           |           |           | 52    | 1  | 0 | 1.310528  | -0.192658 | 2.283285  |
| -----                                                  |    |   |           |           |           | ----- |    |   |           |           |           |

G = 10.9 kcal mol<sup>-1</sup>

| Center Number | Atomic Number | Atomic Type | Coordinates (Angstroms) |           |           |
|---------------|---------------|-------------|-------------------------|-----------|-----------|
|               |               |             | X                       | Y         | Z         |
| 1             | 46            | 0           | -1.218735               | -0.438682 | -0.503482 |
| 2             | 46            | 0           | 1.224147                | 1.037657  | -0.380652 |
| 3             | 7             | 0           | -2.062727               | 1.379206  | 0.129654  |
| 4             | 7             | 0           | -3.310375               | 1.392397  | 0.356570  |
| 5             | 6             | 0           | -3.948043               | 0.171045  | 0.151539  |
| 6             | 6             | 0           | -3.252846               | -1.065836 | 0.186978  |
| 7             | 6             | 0           | -3.926396               | -2.240165 | -0.163940 |
| 8             | 1             | 0           | -3.389496               | -3.179401 | -0.143905 |
| 9             | 6             | 0           | -5.271531               | -2.199719 | -0.513065 |
| 10            | 6             | 0           | -5.965686               | -0.984729 | -0.489435 |
| 11            | 1             | 0           | -7.018109               | -0.959924 | -0.747030 |
| 12            | 6             | 0           | -5.314021               | 0.195078  | -0.150223 |
| 13            | 1             | 0           | -5.830140               | 1.147160  | -0.155854 |
| 14            | 6             | 0           | -1.352335               | 2.593420  | 0.284369  |
| 15            | 6             | 0           | 0.057697                | 2.593393  | 0.156564  |
| 16            | 6             | 0           | 0.699549                | 3.833046  | 0.336080  |
| 17            | 1             | 0           | 1.778968                | 3.881001  | 0.270369  |
| 18            | 6             | 0           | -0.005677               | 5.000200  | 0.599374  |
| 19            | 1             | 0           | 0.530971                | 5.935465  | 0.719787  |
| 20            | 6             | 0           | -1.402030               | 4.974843  | 0.711683  |
| 21            | 1             | 0           | -1.954690               | 5.884484  | 0.915933  |
| 22            | 6             | 0           | -2.070891               | 3.779106  | 0.558219  |
| 23            | 1             | 0           | -3.147744               | 3.731381  | 0.641553  |
| 24            | 16            | 0           | 2.594991                | 1.319483  | 1.494620  |
| 25            | 6             | 0           | 3.958317                | 0.144533  | 1.044103  |
| 26            | 1             | 0           | 3.812973                | -0.790366 | 1.584809  |
| 27            | 1             | 0           | 4.903075                | 0.593652  | 1.346786  |
| 28            | 6             | 0           | 3.980227                | -0.136724 | -0.463700 |
| 29            | 1             | 0           | 4.270611                | 0.780340  | -0.985719 |

HF=-2731.5276635\ZeroPoint=0.3610536\Thermal=0.3941322

G = 13.8 kcal mol<sup>-1</sup>

| Center Number | Atomic Number | Atomic Type | Coordinates (Angstroms) |           |           |
|---------------|---------------|-------------|-------------------------|-----------|-----------|
|               |               |             | X                       | Y         | Z         |
| 1             | 46            | 0           | -1.678828               | -0.079855 | -0.777829 |
| 2             | 46            | 0           | 1.473591                | 0.452469  | -0.786515 |
| 3             | 7             | 0           | -1.524678               | 1.776178  | 0.226049  |
| 4             | 7             | 0           | -2.467440               | 2.062286  | 1.024708  |
| 5             | 6             | 0           | -3.489024               | 1.118340  | 1.040855  |
| 6             | 6             | 0           | -3.365101               | -0.076177 | 0.279214  |
| 7             | 6             | 0           | -4.449924               | -0.958559 | 0.280287  |
| 8             | 1             | 0           | -4.411685               | -1.850467 | -0.333237 |
| 9             | 6             | 0           | -5.590154               | -0.688341 | 1.044596  |
| 10            | 6             | 0           | -5.679315               | 0.473980  | 1.816925  |
| 11            | 1             | 0           | -6.569179               | 0.672726  | 2.402451  |
| 12            | 6             | 0           | -4.629730               | 1.384456  | 1.811480  |
| 13            | 1             | 0           | -4.677895               | 2.308642  | 2.375630  |
| 14            | 6             | 0           | -0.462008               | 2.721739  | 0.141334  |
| 15            | 6             | 0           | 0.829301                | 2.300746  | -0.236325 |
| 16            | 6             | 0           | 1.824736                | 3.293482  | -0.266598 |
| 17            | 1             | 0           | 2.835153                | 3.027995  | -0.563109 |
| 18            | 6             | 0           | 1.558328                | 4.627674  | 0.027144  |
| 19            | 1             | 0           | 2.353502                | 5.363156  | -0.034987 |
| 20            | 6             | 0           | 0.264050                | 5.020014  | 0.378908  |
| 21            | 1             | 0           | 0.041667                | 6.059295  | 0.591450  |
| 22            | 6             | 0           | -0.739443               | 4.070065  | 0.440882  |
| 23            | 1             | 0           | -1.750272               | 4.349508  | 0.706873  |
| 24            | 16            | 0           | 2.635738                | -1.585610 | -1.471058 |
| 25            | 6             | 0           | 4.114189                | -1.216191 | -0.437387 |
| 26            | 1             | 0           | 4.699208                | -0.437165 | -0.933795 |
| 27            | 1             | 0           | 4.737077                | -2.107542 | -0.351445 |

|                                                        |    |   |           |           |           |       |    |   |           |           |           |
|--------------------------------------------------------|----|---|-----------|-----------|-----------|-------|----|---|-----------|-----------|-----------|
| 28                                                     | 6  | 0 | 3.700542  | -0.747387 | 0.965806  | 26    | 1  | 0 | 4.732669  | -0.402766 | -0.998192 |
| 29                                                     | 1  | 0 | 3.192898  | -1.568113 | 1.470224  | 27    | 1  | 0 | 4.788900  | -2.068824 | -0.404020 |
| 30                                                     | 6  | 0 | 4.923740  | -0.348171 | 1.774532  | 28    | 6  | 0 | 3.756185  | -0.703801 | 0.911238  |
| 31                                                     | 8  | 0 | 5.664628  | -1.422209 | 2.113976  | 29    | 1  | 0 | 3.249745  | -1.518132 | 1.428189  |
| 32                                                     | 8  | 0 | 5.227992  | 0.785607  | 2.057298  | 30    | 6  | 0 | 4.982335  | -0.291956 | 1.708831  |
| 33                                                     | 7  | 0 | 2.749357  | 0.392912  | 0.897972  | 31    | 8  | 0 | 5.720584  | -1.360460 | 2.069286  |
| 34                                                     | 1  | 0 | 2.114352  | 0.338494  | 1.690140  | 32    | 8  | 0 | 5.291612  | 0.847108  | 1.964989  |
| 35                                                     | 1  | 0 | 3.262322  | 1.269876  | 0.990639  | 33    | 7  | 0 | 2.804675  | 0.435489  | 0.832763  |
| 36                                                     | 1  | 0 | -6.419641 | -1.387740 | 1.028723  | 34    | 1  | 0 | 2.175591  | 0.393755  | 1.630996  |
| 37                                                     | 1  | 0 | 6.452263  | -1.105574 | 2.582506  | 35    | 1  | 0 | 3.319386  | 1.313448  | 0.901551  |
| 38                                                     | 1  | 0 | -1.896992 | -1.158356 | 1.218222  | 36    | 1  | 0 | -6.584344 | -1.211430 | 0.717407  |
| 39                                                     | 7  | 0 | -1.700131 | -1.907947 | 1.939214  | 37    | 1  | 0 | 6.510276  | -1.036442 | 2.529193  |
| 40                                                     | 6  | 0 | -1.083949 | -3.073899 | 1.218651  | 38    | 1  | 0 | -2.334903 | -0.911069 | 1.014089  |
| 41                                                     | 6  | 0 | -1.876779 | -3.413860 | -0.049164 | 39    | 7  | 0 | -1.787674 | -1.861317 | 2.035152  |
| 42                                                     | 1  | 0 | -1.109202 | -3.926299 | 1.906190  | 40    | 6  | 0 | -1.091087 | -2.971749 | 1.360010  |
| 43                                                     | 6  | 0 | 0.391109  | -2.673397 | 1.023481  | 41    | 6  | 0 | -1.837235 | -3.421309 | 0.086444  |
| 44                                                     | 16 | 0 | -1.716888 | -2.291299 | -1.499658 | 42    | 1  | 0 | -1.036570 | -3.842451 | 2.027563  |
| 45                                                     | 1  | 0 | -2.924237 | -3.565180 | 0.236548  | 43    | 6  | 0 | 0.356121  | -2.531868 | 1.118512  |
| 46                                                     | 1  | 0 | -1.498029 | -4.372864 | -0.405758 | 44    | 16 | 0 | -1.711506 | -2.371261 | -1.423126 |
| 47                                                     | 8  | 0 | 1.015876  | -3.372147 | 0.140720  | 45    | 1  | 0 | -2.882105 | -3.602077 | 0.358859  |
| 48                                                     | 8  | 0 | 0.844071  | -1.765095 | 1.715795  | 46    | 1  | 0 | -1.410220 | -4.375411 | -0.225305 |
| 49                                                     | 1  | 0 | -1.001102 | -1.524040 | 2.585639  | 47    | 8  | 0 | 0.996636  | -3.311618 | 0.288875  |
| 50                                                     | 17 | 0 | -0.042747 | 0.496501  | -2.590959 | 48    | 8  | 0 | 0.814416  | -1.555601 | 1.692536  |
| 51                                                     | 1  | 0 | -2.579517 | -2.132264 | 2.402128  | 49    | 1  | 0 | -1.120566 | -1.330215 | 2.593726  |
| 52                                                     | 1  | 0 | 1.751640  | -2.764670 | -0.393071 | 50    | 17 | 0 | -0.139350 | 0.384577  | -2.535479 |
| -----                                                  |    |   |           |           |           | 51    | 1  | 0 | -2.554131 | -2.183174 | 2.617473  |
| HF=-2731.5238283\ZeroPoint=0.3609969\Thermal=0.3935033 |    |   |           |           |           | 52    | 1  | 0 | 1.714486  | -2.779719 | -0.238476 |
| -----                                                  |    |   |           |           |           | ----- |    |   |           |           |           |

G = 25.5 kcal mol<sup>-1</sup>

| Center Number | Atomic Number | Atomic Type | Coordinates (Angstroms) |           |           |
|---------------|---------------|-------------|-------------------------|-----------|-----------|
|               |               |             | X                       | Y         | Z         |
| 1             | 46            | 0           | -1.621707               | -0.172429 | -0.694748 |
| 2             | 46            | 0           | 1.493596                | 0.438846  | -0.815640 |
| 3             | 7             | 0           | -1.498816               | 1.724745  | 0.262655  |
| 4             | 7             | 0           | -2.477389               | 2.041459  | 1.006884  |
| 5             | 6             | 0           | -3.514764               | 1.118760  | 1.011248  |
| 6             | 6             | 0           | -3.340468               | -0.187612 | 0.470612  |
| 7             | 6             | 0           | -4.479602               | -1.000020 | 0.353982  |
| 8             | 1             | 0           | -4.382078               | -1.979630 | -0.096252 |
| 9             | 6             | 0           | -5.718860               | -0.565762 | 0.815796  |
| 10            | 6             | 0           | -5.854064               | 0.694373  | 1.409762  |
| 11            | 1             | 0           | -6.820413               | 1.020602  | 1.776044  |
| 12            | 6             | 0           | -4.755163               | 1.537750  | 1.508908  |
| 13            | 1             | 0           | -4.841714               | 2.534226  | 1.925126  |
| 14            | 6             | 0           | -0.454816               | 2.683942  | 0.157649  |
| 15            | 6             | 0           | 0.830933                | 2.281380  | -0.260847 |
| 16            | 6             | 0           | 1.808590                | 3.291610  | -0.324009 |
| 17            | 1             | 0           | 2.813076                | 3.041316  | -0.652029 |
| 18            | 6             | 0           | 1.531446                | 4.620580  | -0.022621 |
| 19            | 1             | 0           | 2.312401                | 5.368607  | -0.110500 |
| 20            | 6             | 0           | 0.242341                | 4.994090  | 0.372384  |
| 21            | 1             | 0           | 0.012411                | 6.029907  | 0.593300  |
| 22            | 6             | 0           | -0.743442               | 4.031059  | 0.465637  |
| 23            | 1             | 0           | -1.748697               | 4.296879  | 0.763160  |
| 24            | 16            | 0           | 2.662608                | -1.582982 | -1.487887 |
| 25            | 6             | 0           | 4.158158                | -1.182899 | -0.490593 |

HF=-2731.5031462\ZeroPoint=0.3577569\Thermal=0.3898125

G = 21.8 kcal mol<sup>-1</sup>

| Center Number | Atomic Number | Atomic Type | Coordinates (Angstroms) |           |           |
|---------------|---------------|-------------|-------------------------|-----------|-----------|
|               |               |             | X                       | Y         | Z         |
| 1             | 46            | 0           | 1.563289                | -0.211875 | 0.567241  |
| 2             | 46            | 0           | -1.425663               | 0.484115  | 0.798811  |
| 3             | 7             | 0           | 1.587229                | 1.734072  | -0.301223 |
| 4             | 7             | 0           | 2.652778                | 2.078707  | -0.895297 |
| 5             | 6             | 0           | 3.667566                | 1.125456  | -0.876631 |
| 6             | 6             | 0           | 3.414525                | -0.254172 | -0.664891 |
| 7             | 6             | 0           | 4.494672                | -1.132021 | -0.526990 |
| 8             | 1             | 0           | 4.300513                | -2.182106 | -0.356565 |
| 9             | 6             | 0           | 5.799258                | -0.661597 | -0.624568 |
| 10            | 6             | 0           | 6.040273                | 0.691579  | -0.887136 |
| 11            | 1             | 0           | 7.058691                | 1.051169  | -0.976898 |
| 12            | 6             | 0           | 4.982386                | 1.582093  | -1.022460 |
| 13            | 1             | 0           | 5.150763                | 2.637408  | -1.198050 |
| 14            | 6             | 0           | 0.545445                | 2.697094  | -0.250571 |
| 15            | 6             | 0           | -0.746573               | 2.300477  | 0.158363  |
| 16            | 6             | 0           | -1.727535               | 3.310899  | 0.174142  |
| 17            | 1             | 0           | -2.735983               | 3.070221  | 0.496823  |
| 18            | 6             | 0           | -1.451143               | 4.628558  | -0.170138 |
| 19            | 1             | 0           | -2.236712               | 5.375395  | -0.122371 |
| 20            | 6             | 0           | -0.157527               | 4.994001  | -0.561776 |
| 21            | 1             | 0           | 0.069122                | 6.021205  | -0.822484 |
| 22            | 6             | 0           | 0.833541                | 4.034684  | -0.603023 |
| 23            | 1             | 0           | 1.840766                | 4.294093  | -0.898579 |

|    |    |   |           |           |           |    |    |   |           |           |           |
|----|----|---|-----------|-----------|-----------|----|----|---|-----------|-----------|-----------|
| 24 | 16 | 0 | -2.638294 | -1.454408 | 1.594859  | 22 | 6  | 0 | -2.102541 | 3.730947  | -0.159555 |
| 25 | 6  | 0 | -4.163923 | -1.003357 | 0.667608  | 23 | 1  | 0 | -3.163004 | 3.738472  | 0.057555  |
| 26 | 1  | 0 | -4.656592 | -0.161387 | 1.162252  | 24 | 16 | 0 | 2.001942  | 1.455232  | 1.836551  |
| 27 | 1  | 0 | -4.853670 | -1.848709 | 0.665638  | 25 | 6  | 0 | 3.716303  | 0.755373  | 1.730070  |
| 28 | 6  | 0 | -3.813227 | -0.626030 | -0.778129 | 26 | 1  | 0 | 3.772548  | -0.017513 | 2.496570  |
| 29 | 1  | 0 | -3.408058 | -1.504099 | -1.280417 | 27 | 1  | 0 | 4.422857  | 1.548757  | 1.960992  |
| 30 | 6  | 0 | -5.047984 | -0.149727 | -1.524096 | 28 | 6  | 0 | 3.992209  | 0.168335  | 0.339009  |
| 31 | 8  | 0 | -5.900260 | -1.163873 | -1.769663 | 29 | 1  | 0 | 4.148365  | 0.996049  | -0.362741 |
| 32 | 8  | 0 | -5.271534 | 0.996633  | -1.832819 | 30 | 6  | 0 | 5.284793  | -0.647020 | 0.291631  |
| 33 | 7  | 0 | -2.769138 | 0.433394  | -0.818102 | 31 | 8  | 0 | 6.278894  | -0.042734 | 0.979781  |
| 34 | 1  | 0 | -2.152958 | 0.250191  | -1.607090 | 32 | 8  | 0 | 5.423133  | -1.669946 | -0.323504 |
| 35 | 1  | 0 | -3.210836 | 1.339297  | -0.974656 | 33 | 7  | 0 | 2.839061  | -0.617974 | -0.128283 |
| 36 | 1  | 0 | 6.630463  | -1.347748 | -0.512668 | 34 | 1  | 0 | 3.097002  | -1.175590 | -0.938932 |
| 37 | 1  | 0 | -6.686097 | -0.795759 | -2.202138 | 35 | 1  | 0 | 2.583851  | -1.301222 | 0.596902  |
| 38 | 1  | 0 | 2.449265  | -0.732384 | -1.047944 | 36 | 16 | 0 | -0.020501 | 0.129935  | -2.265587 |
| 39 | 7  | 0 | 1.586480  | -2.229037 | -2.255397 | 37 | 6  | 0 | 0.373013  | -1.595813 | -2.827878 |
| 40 | 6  | 0 | 0.872802  | -3.186694 | -1.408721 | 38 | 1  | 0 | -0.042484 | -1.660171 | -3.836721 |
| 41 | 6  | 0 | 1.668708  | -3.513475 | -0.122272 | 39 | 1  | 0 | 1.449521  | -1.742621 | -2.898453 |
| 42 | 1  | 0 | 0.712590  | -4.148547 | -1.921152 | 40 | 6  | 0 | -0.224844 | -2.704614 | -1.952840 |
| 43 | 6  | 0 | -0.525149 | -2.650047 | -1.115624 | 41 | 1  | 0 | -0.165631 | -3.649890 | -2.507158 |
| 44 | 16 | 0 | 1.551625  | -2.388758 | 1.335201  | 42 | 7  | 0 | -1.647087 | -2.404960 | -1.616376 |
| 45 | 1  | 0 | 2.711341  | -3.674250 | -0.411269 | 43 | 1  | 0 | -1.973387 | -3.068916 | -0.918478 |
| 46 | 1  | 0 | 1.291814  | -4.454137 | 0.285391  | 44 | 6  | 0 | 0.621514  | -2.912007 | -0.690938 |
| 47 | 8  | 0 | -1.169992 | -3.374129 | -0.227303 | 45 | 8  | 0 | -0.075731 | -2.850655 | 0.424822  |
| 48 | 8  | 0 | -0.966219 | -1.660819 | -1.677157 | 46 | 8  | 0 | 1.810948  | -3.110370 | -0.792851 |
| 49 | 1  | 0 | 0.926024  | -1.726394 | -2.840805 | 47 | 1  | 0 | -5.723726 | -3.043127 | 1.711681  |
| 50 | 17 | 0 | 0.256300  | 0.433016  | 2.479658  | 48 | 1  | 0 | -2.231923 | -2.506259 | -2.443269 |
| 51 | 1  | 0 | 2.263363  | -2.694515 | -2.848770 | 49 | 1  | 0 | 1.491974  | 0.273556  | 2.376101  |
| 52 | 1  | 0 | -1.819075 | -2.791323 | 0.305369  | 50 | 1  | 0 | 7.077340  | -0.584907 | 0.885858  |
|    |    |   |           |           |           | 51 | 1  | 0 | 0.514681  | -2.685059 | 1.236778  |
|    |    |   |           |           |           | 52 | 17 | 0 | 1.576623  | -1.846776 | 2.653323  |

HF=-2731.5097221\ZeroPoint=0.3603521\Thermal=0.3932931

G = -6.1 kcal mol<sup>-1</sup>

| Center Number | Atomic Number | Atomic Type | Coordinates (Angstroms) |           |           |
|---------------|---------------|-------------|-------------------------|-----------|-----------|
|               |               |             | X                       | Y         | Z         |
| 1             | 46            | 0           | -1.878110               | -0.470880 | -0.796493 |
| 2             | 46            | 0           | 1.164794                | 0.803125  | -0.331867 |
| 3             | 7             | 0           | -2.148276               | 1.319464  | 0.152840  |
| 4             | 7             | 0           | -3.077315               | 1.414987  | 1.004385  |
| 5             | 6             | 0           | -3.781351               | 0.231367  | 1.183190  |
| 6             | 6             | 0           | -3.407512               | -0.908641 | 0.424158  |
| 7             | 6             | 0           | -4.131112               | -2.077347 | 0.632350  |
| 8             | 1             | 0           | -3.898682               | -2.986089 | 0.084680  |
| 9             | 6             | 0           | -5.178976               | -2.116847 | 1.562125  |
| 10            | 6             | 0           | -5.527763               | -0.984990 | 2.301393  |
| 11            | 1             | 0           | -6.337992               | -1.031871 | 3.018948  |
| 12            | 6             | 0           | -4.826852               | 0.200641  | 2.113506  |
| 13            | 1             | 0           | -5.069156               | 1.098324  | 2.670059  |
| 14            | 6             | 0           | -1.413054               | 2.506853  | -0.138692 |
| 15            | 6             | 0           | -0.039092               | 2.429147  | -0.415523 |
| 16            | 6             | 0           | 0.617300                | 3.633012  | -0.712289 |
| 17            | 1             | 0           | 1.681772                | 3.625474  | -0.919723 |
| 18            | 6             | 0           | -0.060859               | 4.848452  | -0.753672 |
| 19            | 1             | 0           | 0.476988                | 5.755832  | -1.006603 |
| 20            | 6             | 0           | -1.428460               | 4.898845  | -0.473943 |
| 21            | 1             | 0           | -1.963010               | 5.840936  | -0.507950 |

HF=-2731.5534321\ZeroPoint=0.3610786\Thermal=0.3934441

G = 20.6 kcal mol<sup>-1</sup>

| Center Number | Atomic Number | Atomic Type | Coordinates (Angstroms) |           |           |
|---------------|---------------|-------------|-------------------------|-----------|-----------|
|               |               |             | X                       | Y         | Z         |
| 1             | 46            | 0           | -1.852048               | -0.786322 | -0.706520 |
| 2             | 46            | 0           | 1.532770                | 0.676702  | -0.220678 |
| 3             | 7             | 0           | -2.241696               | 1.176524  | -0.356740 |
| 4             | 7             | 0           | -3.366160               | 1.484489  | 0.130077  |
| 5             | 6             | 0           | -4.186638               | 0.390718  | 0.366314  |
| 6             | 6             | 0           | -3.682851               | -0.907985 | 0.100126  |
| 7             | 6             | 0           | -4.517349               | -1.985419 | 0.373484  |
| 8             | 1             | 0           | -4.194843               | -3.005663 | 0.184493  |
| 9             | 6             | 0           | -5.800116               | -1.780958 | 0.901393  |
| 10            | 6             | 0           | -6.274056               | -0.494108 | 1.162984  |
| 11            | 1             | 0           | -7.265804               | -0.352843 | 1.575318  |
| 12            | 6             | 0           | -5.463910               | 0.604185  | 0.896059  |
| 13            | 1             | 0           | -5.795601               | 1.616848  | 1.092506  |
| 14            | 6             | 0           | -1.346608               | 2.280189  | -0.555283 |
| 15            | 6             | 0           | -0.008157               | 2.230661  | -0.085436 |
| 16            | 6             | 0           | 0.676778                | 3.466417  | -0.129187 |
| 17            | 1             | 0           | 1.674908                | 3.535080  | 0.280145  |
| 18            | 6             | 0           | 0.135573                | 4.614305  | -0.701575 |
| 19            | 1             | 0           | 0.726791                | 5.522637  | -0.735698 |

|    |    |   |           |           |           |    |    |   |           |           |           |
|----|----|---|-----------|-----------|-----------|----|----|---|-----------|-----------|-----------|
| 20 | 6  | 0 | -1.153119 | 4.592754  | -1.226500 | 18 | 6  | 0 | 2.236008  | 3.403815  | -0.633804 |
| 21 | 1  | 0 | -1.581283 | 5.475526  | -1.687323 | 19 | 1  | 0 | 3.241494  | 3.806792  | -0.688078 |
| 22 | 6  | 0 | -1.903656 | 3.430603  | -1.121756 | 20 | 6  | 0 | 1.633875  | 2.875190  | -1.776859 |
| 23 | 1  | 0 | -2.929864 | 3.400222  | -1.464277 | 21 | 1  | 0 | 2.162532  | 2.876316  | -2.723606 |
| 24 | 16 | 0 | 2.922776  | 1.701867  | 1.391227  | 22 | 6  | 0 | 0.349907  | 2.343165  | -1.706864 |
| 25 | 6  | 0 | 4.223131  | 0.408677  | 1.437462  | 23 | 1  | 0 | -0.124663 | 1.908244  | -2.576971 |
| 26 | 1  | 0 | 3.900901  | -0.439609 | 2.049297  | 24 | 16 | 0 | 2.861811  | 0.105954  | 2.321935  |
| 27 | 1  | 0 | 5.125041  | 0.835159  | 1.876868  | 25 | 6  | 0 | 4.454938  | -0.130987 | 1.426433  |
| 28 | 6  | 0 | 4.497424  | -0.061157 | 0.010983  | 26 | 1  | 0 | 4.781430  | -1.175142 | 1.482114  |
| 29 | 1  | 0 | 4.829990  | 0.797717  | -0.577644 | 27 | 1  | 0 | 5.217157  | 0.491257  | 1.898097  |
| 30 | 6  | 0 | 5.566627  | -1.142642 | -0.077859 | 28 | 6  | 0 | 4.289074  | 0.270438  | -0.041862 |
| 31 | 8  | 0 | 6.750257  | -0.705778 | 0.397469  | 29 | 1  | 0 | 4.011155  | 1.324141  | -0.090979 |
| 32 | 8  | 0 | 5.393327  | -2.251684 | -0.520293 | 30 | 6  | 0 | 5.570131  | 0.046107  | -0.828788 |
| 33 | 7  | 0 | 3.226360  | -0.561443 | -0.560665 | 31 | 8  | 0 | 6.501040  | 0.976632  | -0.532627 |
| 34 | 1  | 0 | 3.341446  | -0.754312 | -1.552099 | 32 | 8  | 0 | 5.756450  | -0.860705 | -1.603277 |
| 35 | 1  | 0 | 2.986723  | -1.446927 | -0.106169 | 33 | 7  | 0 | 3.179792  | -0.521235 | -0.625800 |
| 36 | 16 | 0 | 0.264188  | -0.562830 | -1.869363 | 34 | 1  | 0 | 2.928473  | -0.170063 | -1.548057 |
| 37 | 6  | 0 | 0.727199  | -2.360437 | -1.727646 | 35 | 1  | 0 | 3.492598  | -1.482127 | -0.765616 |
| 38 | 1  | 0 | 0.421006  | -2.831845 | -2.665059 | 36 | 16 | 0 | 0.172962  | -0.914293 | -1.505064 |
| 39 | 1  | 0 | 1.804188  | -2.489721 | -1.639538 | 37 | 6  | 0 | -0.239131 | -2.698533 | -1.767490 |
| 40 | 6  | 0 | 0.033166  | -3.071087 | -0.560326 | 38 | 1  | 0 | -0.481328 | -2.818079 | -2.826404 |
| 41 | 1  | 0 | 0.281521  | -4.140343 | -0.589943 | 39 | 1  | 0 | 0.629892  | -3.312331 | -1.535680 |
| 42 | 7  | 0 | -1.438977 | -2.871718 | -0.687631 | 40 | 6  | 0 | -1.416530 | -3.159833 | -0.914053 |
| 43 | 1  | 0 | -1.918350 | -3.251125 | 0.124988  | 41 | 1  | 0 | -1.724138 | -4.165026 | -1.235075 |
| 44 | 6  | 0 | 0.545435  | -2.529926 | 0.786814  | 42 | 7  | 0 | -2.571686 | -2.219694 | -1.061690 |
| 45 | 8  | 0 | -0.435164 | -2.210184 | 1.615800  | 43 | 1  | 0 | -3.260240 | -2.415649 | -0.338627 |
| 46 | 8  | 0 | 1.728655  | -2.427286 | 1.013079  | 44 | 6  | 0 | -0.995197 | -3.300258 | 0.552316  |
| 47 | 1  | 0 | -6.432173 | -2.637209 | 1.112957  | 45 | 8  | 0 | -1.985215 | -2.959912 | 1.393873  |
| 48 | 1  | 0 | -1.787410 | -3.351804 | -1.514570 | 46 | 8  | 0 | 0.084444  | -3.708126 | 0.878991  |
| 49 | 1  | 0 | -0.031132 | 1.371107  | 1.112608  | 47 | 1  | 0 | -7.118273 | -0.021546 | 0.515741  |
| 50 | 1  | 0 | 7.388459  | -1.431702 | 0.322480  | 48 | 1  | 0 | -3.016621 | -2.361131 | -1.965932 |
| 51 | 1  | 0 | -0.227701 | -1.415383 | 2.178337  | 49 | 1  | 0 | -0.269970 | 2.841890  | 1.598903  |
| 52 | 17 | 0 | -0.575762 | 0.698111  | 2.476447  | 50 | 1  | 0 | 7.308051  | 0.759039  | -1.024075 |
|    |    |   |           |           |           | 51 | 1  | 0 | -1.590809 | -2.723369 | 2.251669  |
|    |    |   |           |           |           | 52 | 17 | 0 | -0.390650 | -0.344316 | 2.072151  |

HF=-2731.5090651\ZeroPoint=0.3582348\Thermal=0.3903952

HF=-2731.5691184\ZeroPoint=0.3627532\Thermal=0.396187

G = -17.0 kcal mol<sup>-1</sup>

G = -0.6 kcal mol<sup>-1</sup>

| Center Number | Atomic Number | Atomic Type | Coordinates (Angstroms) |           |           |
|---------------|---------------|-------------|-------------------------|-----------|-----------|
|               |               |             | X                       | Y         | Z         |
| 1             | 46            | 0           | -2.041388               | -0.175404 | -0.871065 |
| 2             | 46            | 0           | 1.444258                | -0.518101 | 0.581209  |
| 3             | 7             | 0           | -1.636449               | 1.790042  | -0.422443 |
| 4             | 7             | 0           | -2.522879               | 2.459358  | 0.175289  |
| 5             | 6             | 0           | -3.737714               | 1.789888  | 0.273848  |
| 6             | 6             | 0           | -3.829864               | 0.461448  | -0.220562 |
| 7             | 6             | 0           | -5.065211               | -0.169611 | -0.115780 |
| 8             | 1             | 0           | -5.205559               | -1.183561 | -0.480292 |
| 9             | 6             | 0           | -6.163342               | 0.489972  | 0.452598  |
| 10            | 6             | 0           | -6.047092               | 1.793394  | 0.940222  |
| 11            | 1             | 0           | -6.903065               | 2.287072  | 1.384255  |
| 12            | 6             | 0           | -4.825792               | 2.451874  | 0.853727  |
| 13            | 1             | 0           | -4.696143               | 3.460933  | 1.226984  |
| 14            | 6             | 0           | -0.334541               | 2.374325  | -0.491394 |
| 15            | 6             | 0           | 0.259135                | 2.897525  | 0.657744  |
| 16            | 6             | 0           | 1.551622                | 3.403520  | 0.581569  |
| 17            | 1             | 0           | 2.033844                | 3.769306  | 1.479337  |

| Center Number | Atomic Number | Atomic Type | Coordinates (Angstroms) |           |           |
|---------------|---------------|-------------|-------------------------|-----------|-----------|
|               |               |             | X                       | Y         | Z         |
| 1             | 46            | 0           | 1.440038                | -0.128085 | -0.208126 |
| 2             | 46            | 0           | -1.325018               | 0.399242  | -0.831501 |
| 3             | 7             | 0           | 0.920910                | -2.055187 | -0.622471 |
| 4             | 7             | 0           | 1.569593                | -2.983346 | -0.056028 |
| 5             | 6             | 0           | 2.526829                | -2.515964 | 0.833228  |
| 6             | 6             | 0           | 2.619910                | -1.116549 | 1.073765  |
| 7             | 6             | 0           | 3.536945                | -0.683684 | 2.025092  |
| 8             | 1             | 0           | 3.639968                | 0.371074  | 2.259894  |
| 9             | 6             | 0           | 4.338400                | -1.603560 | 2.712873  |
| 10            | 6             | 0           | 4.239735                | -2.973809 | 2.459111  |
| 11            | 1             | 0           | 4.865858                | -3.672875 | 3.000432  |
| 12            | 6             | 0           | 3.327710                | -3.437652 | 1.518630  |
| 13            | 1             | 0           | 3.218467                | -4.494852 | 1.307519  |
| 14            | 6             | 0           | -0.166712               | -2.410341 | -1.475465 |
| 15            | 6             | 0           | -1.204464               | -1.474868 | -1.674437 |

|    |    |   |           |           |           |    |    |   |           |           |           |
|----|----|---|-----------|-----------|-----------|----|----|---|-----------|-----------|-----------|
| 16 | 6  | 0 | -2.275028 | -1.898532 | -2.478791 | 14 | 6  | 0 | -0.420059 | -2.287504 | 1.384648  |
| 17 | 1  | 0 | -3.100051 | -1.218451 | -2.667566 | 15 | 6  | 0 | 0.894829  | -1.810800 | 1.185705  |
| 18 | 6  | 0 | -2.304377 | -3.158473 | -3.071393 | 16 | 6  | 0 | 1.879678  | -2.391534 | 2.008740  |
| 19 | 1  | 0 | -3.141118 | -3.439237 | -3.702534 | 17 | 1  | 0 | 2.919891  | -2.117042 | 1.872281  |
| 20 | 6  | 0 | -1.250964 | -4.055540 | -2.867268 | 18 | 6  | 0 | 1.572788  | -3.313058 | 3.006031  |
| 21 | 1  | 0 | -1.263316 | -5.032842 | -3.335712 | 19 | 1  | 0 | 2.359806  | -3.710035 | 3.637571  |
| 22 | 6  | 0 | -0.185484 | -3.686670 | -2.064420 | 20 | 6  | 0 | 0.253583  | -3.728218 | 3.187688  |
| 23 | 1  | 0 | 0.637898  | -4.365240 | -1.883202 | 21 | 1  | 0 | 0.005735  | -4.446190 | 3.960970  |
| 24 | 16 | 0 | -1.545561 | 2.514963  | 0.281576  | 22 | 6  | 0 | -0.745261 | -3.232470 | 2.357541  |
| 25 | 6  | 0 | -3.128444 | 2.139810  | 1.138652  | 23 | 1  | 0 | -1.770384 | -3.567941 | 2.453130  |
| 26 | 1  | 0 | -3.963142 | 2.344166  | 0.460996  | 24 | 16 | 0 | 2.466231  | 2.336926  | 0.032361  |
| 27 | 1  | 0 | -3.231050 | 2.786257  | 2.010856  | 25 | 6  | 0 | 4.075910  | 1.790393  | -0.674431 |
| 28 | 6  | 0 | -3.174439 | 0.673449  | 1.586957  | 26 | 1  | 0 | 4.826877  | 1.714674  | 0.118183  |
| 29 | 1  | 0 | -2.386190 | 0.507439  | 2.320328  | 27 | 1  | 0 | 4.410055  | 2.538485  | -1.394616 |
| 30 | 6  | 0 | -4.519753 | 0.353958  | 2.221595  | 28 | 6  | 0 | 3.915972  | 0.430109  | -1.357477 |
| 31 | 8  | 0 | -4.633908 | 0.906496  | 3.446042  | 29 | 1  | 0 | 3.224060  | 0.520234  | -2.196002 |
| 32 | 8  | 0 | -5.398297 | -0.283491 | 1.693373  | 30 | 6  | 0 | 5.263553  | -0.069913 | -1.859303 |
| 33 | 7  | 0 | -2.924719 | -0.233110 | 0.439307  | 31 | 8  | 0 | 5.625187  | 0.544378  | -3.003348 |
| 34 | 1  | 0 | -2.692268 | -1.162487 | 0.783860  | 32 | 8  | 0 | 5.949530  | -0.882128 | -1.289467 |
| 35 | 1  | 0 | -3.784232 | -0.337611 | -0.099551 | 33 | 7  | 0 | 3.339093  | -0.532204 | -0.393017 |
| 36 | 16 | 0 | 0.490156  | 0.956241  | -2.224100 | 34 | 1  | 0 | 3.047224  | -1.379878 | -0.891193 |
| 37 | 6  | 0 | 1.024851  | 2.684567  | -1.833510 | 35 | 1  | 0 | 4.061575  | -0.800717 | 0.274534  |
| 38 | 1  | 0 | 1.371537  | 3.134704  | -2.762587 | 36 | 16 | 0 | -0.300327 | 1.099671  | 1.651578  |
| 39 | 1  | 0 | 0.168911  | 3.257189  | -1.474985 | 37 | 6  | 0 | -0.583934 | 2.852703  | 1.126127  |
| 40 | 6  | 0 | 2.169176  | 2.703459  | -0.809875 | 38 | 1  | 0 | -0.322845 | 3.515600  | 1.949165  |
| 41 | 1  | 0 | 3.065115  | 2.287630  | -1.281222 | 39 | 1  | 0 | 0.053158  | 3.090915  | 0.271882  |
| 42 | 7  | 0 | 1.847181  | 1.853452  | 0.362528  | 40 | 6  | 0 | -2.056027 | 3.041856  | 0.744130  |
| 43 | 1  | 0 | 0.963016  | 2.173639  | 0.780340  | 41 | 1  | 0 | -2.687559 | 2.821340  | 1.608448  |
| 44 | 6  | 0 | 2.526346  | 4.113751  | -0.349754 | 42 | 7  | 0 | -2.422383 | 2.098880  | -0.343250 |
| 45 | 8  | 0 | 2.642675  | 4.446480  | 0.802249  | 43 | 1  | 0 | -1.949287 | 2.384460  | -1.201754 |
| 46 | 8  | 0 | 2.730328  | 4.938998  | -1.394734 | 44 | 6  | 0 | -2.322036 | 4.477398  | 0.304329  |
| 47 | 1  | 0 | 5.041511  | -1.245433 | 3.457442  | 45 | 8  | 0 | -2.611366 | 4.802060  | -0.819762 |
| 48 | 1  | 0 | 2.964779  | 5.812606  | -1.045243 | 46 | 8  | 0 | -2.182578 | 5.338419  | 1.328115  |
| 49 | 1  | 0 | 2.562071  | 1.972207  | 1.076119  | 47 | 1  | 0 | -5.762541 | -0.840248 | -3.327552 |
| 50 | 1  | 0 | 0.192691  | -0.888088 | 1.649925  | 48 | 1  | 0 | -2.331548 | 6.236354  | 0.993218  |
| 51 | 1  | 0 | -5.520538 | 0.705307  | 3.782928  | 49 | 1  | 0 | -3.417387 | 2.168840  | -0.542821 |
| 52 | 17 | 0 | -0.543112 | -1.504013 | 2.550380  | 50 | 1  | 0 | 1.061432  | -1.852958 | -0.232869 |
|    |    |   |           |           |           | 51 | 1  | 0 | 6.502478  | 0.216364  | -3.254314 |
|    |    |   |           |           |           | 52 | 17 | 0 | 1.143034  | -2.388594 | -1.724543 |

HF=-2731.5414917\ZeroPoint=0.360366\Thermal=0.3939839

G = 12.2 kcal mol<sup>-1</sup>

| Center Number | Atomic Number | Atomic Type | Coordinates (Angstroms) |           |           |
|---------------|---------------|-------------|-------------------------|-----------|-----------|
|               |               |             | X                       | Y         | Z         |
| 1             | 46            | 0           | -1.864448               | 0.113146  | 0.094266  |
| 2             | 46            | 0           | 1.593156                | 0.230087  | 0.569267  |
| 3             | 7             | 0           | -1.451861               | -1.837370 | 0.498397  |
| 4             | 7             | 0           | -2.199198               | -2.727523 | 0.007865  |
| 5             | 6             | 0           | -3.164749               | -2.217496 | -0.853125 |
| 6             | 6             | 0           | -3.219581               | -0.813975 | -1.066299 |
| 7             | 6             | 0           | -4.170718               | -0.343647 | -1.964350 |
| 8             | 1             | 0           | -4.252728               | 0.716900  | -2.185407 |
| 9             | 6             | 0           | -5.034335               | -1.230321 | -2.624008 |
| 10            | 6             | 0           | -4.967258               | -2.605534 | -2.394359 |
| 11            | 1             | 0           | -5.640095               | -3.277537 | -2.913243 |
| 12            | 6             | 0           | -4.024782               | -3.108535 | -1.503706 |
| 13            | 1             | 0           | -3.935730               | -4.170822 | -1.309464 |

HF=-2731.5183004\ZeroPoint=0.3584111\Thermal=0.3914521

G = -25.8 kcal mol<sup>-1</sup>

| Center Number | Atomic Number | Atomic Type | Coordinates (Angstroms) |           |           |
|---------------|---------------|-------------|-------------------------|-----------|-----------|
|               |               |             | X                       | Y         | Z         |
| 1             | 46            | 0           | -1.758356               | 0.007401  | -0.009496 |
| 2             | 46            | 0           | 1.840712                | -0.695865 | -0.119285 |
| 3             | 7             | 0           | -1.908166               | 2.087870  | 0.090974  |
| 4             | 7             | 0           | -2.833209               | 2.571087  | 0.806443  |
| 5             | 6             | 0           | -3.540498               | 1.616263  | 1.522271  |
| 6             | 6             | 0           | -3.223595               | 0.247025  | 1.336996  |
| 7             | 6             | 0           | -3.925493               | -0.678156 | 2.103392  |
| 8             | 1             | 0           | -3.710596               | -1.739971 | 2.036971  |
| 9             | 6             | 0           | -4.913922               | -0.258929 | 3.004092  |
| 10            | 6             | 0           | -5.223410               | 1.094304  | 3.157678  |
| 11            | 1             | 0           | -5.991990               | 1.401566  | 3.856609  |

|    |    |   |           |           |           |    |    |   |           |           |           |
|----|----|---|-----------|-----------|-----------|----|----|---|-----------|-----------|-----------|
| 12 | 6  | 0 | -4.531821 | 2.043438  | 2.414837  | 34 | 1  | 0 | 3.582121  | -1.765891 | 1.522242  |
| 13 | 1  | 0 | -4.735957 | 3.103169  | 2.513816  | 35 | 1  | 0 | 3.168247  | -0.309572 | 2.110704  |
| 14 | 6  | 0 | -1.209092 | 3.030579  | -0.720521 | 36 | 16 | 0 | 0.047652  | -0.438452 | -1.647691 |
| 15 | 6  | 0 | 0.159375  | 2.859670  | -0.920705 | 37 | 6  | 0 | -0.396528 | -2.199379 | -2.038194 |
| 16 | 6  | 0 | 0.856423  | 3.766938  | -1.711017 | 38 | 1  | 0 | -0.343107 | -2.332305 | -3.117069 |
| 17 | 1  | 0 | 1.917971  | 3.614905  | -1.861844 | 39 | 1  | 0 | 0.331881  | -2.853981 | -1.563392 |
| 18 | 6  | 0 | 0.187090  | 4.834227  | -2.307807 | 40 | 6  | 0 | -1.807852 | -2.529509 | -1.541706 |
| 19 | 1  | 0 | 0.729074  | 5.532385  | -2.935603 | 41 | 1  | 0 | -2.536046 | -2.003321 | -2.167375 |
| 20 | 6  | 0 | -1.186109 | 4.997328  | -2.108125 | 42 | 7  | 0 | -1.980588 | -2.065447 | -0.148337 |
| 21 | 1  | 0 | -1.710828 | 5.819623  | -2.581069 | 43 | 1  | 0 | -1.221205 | -2.448535 | 0.437617  |
| 22 | 6  | 0 | -1.889971 | 4.101247  | -1.313071 | 44 | 6  | 0 | -2.140055 | -4.014823 | -1.646928 |
| 23 | 1  | 0 | -2.955175 | 4.207692  | -1.154800 | 45 | 8  | 0 | -2.616651 | -4.673579 | -0.758426 |
| 24 | 16 | 0 | 3.143202  | 0.837402  | -1.288677 | 46 | 8  | 0 | -1.869460 | -4.496812 | -2.876638 |
| 25 | 6  | 0 | 4.379552  | 1.129625  | 0.046313  | 47 | 1  | 0 | -5.443818 | -0.999874 | 3.593457  |
| 26 | 1  | 0 | 3.992504  | 1.844687  | 0.779301  | 48 | 1  | 0 | -2.116981 | -5.434229 | -2.890773 |
| 27 | 1  | 0 | 5.278722  | 1.552490  | -0.404554 | 49 | 1  | 0 | -2.861322 | -2.413049 | 0.221204  |
| 28 | 6  | 0 | 4.714658  | -0.189853 | 0.752656  | 50 | 1  | 0 | 0.684073  | 2.040100  | -0.450552 |
| 29 | 1  | 0 | 5.156287  | -0.874332 | 0.026764  | 51 | 1  | 0 | 7.517583  | 0.438681  | 2.193488  |
| 30 | 6  | 0 | 5.694908  | 0.045963  | 1.892872  | 52 | 17 | 0 | 0.846373  | -2.495017 | 1.192883  |
| 31 | 8  | 0 | 6.946329  | 0.249572  | 1.433072  |    |    |   |           |           |           |
| 32 | 8  | 0 | 5.396089  | 0.085787  | 3.060455  |    |    |   |           |           |           |
| 33 | 7  | 0 | 3.459929  | -0.789843 | 1.258882  |    |    |   |           |           |           |

-----  
HF=-2731.5832121\ZeroPoint=0.3637664\Thermal=0.3970488

## Structures from Table S7

**Table S7. PATH II:** B3LYP-D3/6-311+G\*\*/SDD(Pd)/gas phase free energies for the pre- and postreaction complexes and the transition states for **the first D-transfer**. Free energies relative to **B1-1** (in kcal mol<sup>-1</sup>).

| Mother complex→           | B1-1                   |                              |      | B1-2                   |                              |       |
|---------------------------|------------------------|------------------------------|------|------------------------|------------------------------|-------|
| D-source→                 | Cys <sup>4D</sup> ·DCI | Cys <sup>4D</sup> ·DCI       | DCI  | Cys <sup>4D</sup> ·DCI | Cys <sup>4D</sup> ·DCI       | DCI   |
| Donor group→              | COOD                   | ND <sub>3</sub> <sup>+</sup> | DCI  | COOD                   | ND <sub>3</sub> <sup>+</sup> | DCI   |
| <b>Inside D-transfer</b>  |                        |                              |      |                        |                              |       |
| Prereaction complex       | -9.5                   | <b>-21.3</b>                 | -0.0 | <b>-11.7</b>           | -15.4                        | -0.6  |
| Transition state          | 7.0                    | <b>1.4</b>                   | 12.4 | <b>6.2</b>             | 11.3                         | 11.3  |
| Postreaction complex      | 2.2                    | <b>-1.6</b>                  | 1.4  | <b>-6.3</b>            | -12.4                        | -11.4 |
| <b>Outside D-transfer</b> |                        |                              |      |                        |                              |       |
| Prereaction complex       | -13.8                  | -6.9                         | -0.8 | -10.4                  | -3.7                         | 3.3   |
| Transition state          | 6.4                    | 6.8                          | 13.6 | 10.6                   | 13.0                         | 18.0  |
| Postreaction complex      | -3.0                   | -3.3                         | 8.0  | 4.9                    | 2.1                          | 13.9  |

G = -9.5 kcal mol<sup>-1</sup>

| Center Number | Atomic Number | Atomic Type | Coordinates (Angstroms) |           |           |    |    |   |           |           |           |
|---------------|---------------|-------------|-------------------------|-----------|-----------|----|----|---|-----------|-----------|-----------|
|               |               |             | X                       | Y         | Z         |    |    |   |           |           |           |
| 1             | 46            | 0           | 2.278474                | -0.196310 | 0.375944  | 33 | 7  | 0 | -2.012742 | 1.032127  | 1.584749  |
| 2             | 46            | 0           | -0.405503               | 1.826582  | 0.336744  | 34 | 1  | 0 | -1.825215 | 1.247519  | 2.560585  |
| 3             | 7             | 0           | 2.372852                | 0.887183  | -1.368432 | 35 | 1  | 0 | -2.041019 | 0.013180  | 1.540242  |
| 4             | 7             | 0           | 2.867866                | 0.322705  | -2.386430 | 36 | 16 | 0 | 1.415505  | 1.506044  | 1.864096  |
| 5             | 6             | 0           | 3.222633                | -1.006278 | -2.175366 | 37 | 6  | 0 | 0.885252  | 0.302449  | 3.170410  |
| 6             | 6             | 0           | 3.004642                | -1.583806 | -0.896164 | 38 | 1  | 0 | 0.746235  | 0.831568  | 4.112115  |
| 7             | 6             | 0           | 3.334007                | -2.927917 | -0.735617 | 39 | 1  | 0 | -0.048507 | -0.183925 | 2.884827  |
| 8             | 1             | 0           | 3.172269                | -3.431012 | 0.213447  | 40 | 6  | 0 | 1.964112  | -0.772597 | 3.328202  |
| 9             | 6             | 0           | 3.863877                | -3.670038 | -1.800470 | 41 | 1  | 0 | 2.909649  | -0.289280 | 3.590053  |
| 10            | 6             | 0           | 4.077976                | -3.078608 | -3.045904 | 42 | 7  | 0 | 2.142023  | -1.477478 | 2.037517  |
| 11            | 1             | 0           | 4.487264                | -3.662652 | -3.861386 | 43 | 1  | 0 | 1.296071  | -2.017520 | 1.833098  |
| 12            | 6             | 0           | 3.755559                | -1.738962 | -3.240870 | 44 | 6  | 0 | 1.630982  | -1.774878 | 4.429740  |
| 13            | 1             | 0           | 3.904910                | -1.253201 | -4.197877 | 45 | 8  | 0 | 1.517821  | -2.961675 | 4.260087  |
| 14            | 6             | 0           | 2.045266                | 2.269085  | -1.500449 | 46 | 8  | 0 | 1.488414  | -1.165411 | 5.622493  |
| 15            | 6             | 0           | 0.913285                | 2.797985  | -0.851050 | 47 | 1  | 0 | 4.104874  | -4.717409 | -1.654166 |
| 16            | 6             | 0           | 0.658760                | 4.164746  | -1.060944 | 48 | 1  | 0 | 1.283497  | -1.842789 | 6.285782  |
| 17            | 1             | 0           | -0.222560               | 4.610530  | -0.617262 | 49 | 1  | 0 | 2.909478  | -2.140776 | 2.103813  |
| 18            | 6             | 0           | 1.498159                | 4.963592  | -1.830565 | 50 | 1  | 0 | -6.305165 | 0.713408  | 2.124281  |
| 19            | 1             | 0           | 1.274273                | 6.018485  | -1.948258 | 51 | 1  | 0 | 0.861241  | -1.775548 | -1.028517 |
| 20            | 6             | 0           | 2.623485                | 4.413473  | -2.451308 | 52 | 7  | 0 | -2.531812 | -0.990951 | -2.000299 |
| 21            | 1             | 0           | 3.284005                | 5.032868  | -3.046726 | 53 | 6  | 0 | -2.357614 | -1.715712 | -0.719934 |
| 22            | 6             | 0           | 2.889591                | 3.065592  | -2.296963 | 54 | 1  | 0 | -3.616443 | -0.978817 | -2.205655 |
| 23            | 1             | 0           | 3.750992                | 2.609708  | -2.767713 | 55 | 1  | 0 | -2.050914 | -1.480833 | -2.755888 |
| 24            | 16            | 0           | -2.087539               | 2.122014  | -1.271375 | 56 | 6  | 0 | -3.019662 | -3.119341 | -0.746498 |
| 25            | 6             | 0           | -3.592085               | 1.673096  | -0.287275 | 57 | 1  | 0 | -2.888052 | -1.153690 | 0.047189  |
| 26            | 1             | 0           | -4.018773               | 0.738140  | -0.660277 | 58 | 6  | 0 | -0.904158 | -1.793333 | -0.301791 |
| 27            | 1             | 0           | -4.352386               | 2.433385  | -0.464817 | 59 | 16 | 0 | -2.826399 | -4.047039 | -2.318590 |
| 28            | 6             | 0           | -3.343742               | 1.591191  | 1.233664  | 60 | 1  | 0 | -4.085999 | -2.989622 | -0.574640 |
| 29            | 1             | 0           | -3.394976               | 2.596912  | 1.652275  | 61 | 1  | 0 | -2.598754 | -3.722008 | 0.058191  |
| 30            | 6             | 0           | -4.442568               | 0.715507  | 1.823024  | 62 | 8  | 0 | -0.072771 | -1.810081 | -1.334076 |
| 31            | 8             | 0           | -5.619459               | 1.354980  | 1.880005  | 63 | 8  | 0 | -0.573980 | -1.870612 | 0.866450  |
| 32            | 8             | 0           | -4.279680               | -0.439009 | 2.141168  | 64 | 1  | 0 | -3.926582 | -3.500759 | -2.889546 |
|               |               |             |                         |           |           | 65 | 1  | 0 | -2.185883 | -0.003211 | -1.931022 |
|               |               |             |                         |           |           | 66 | 17 | 0 | -5.435404 | -1.171976 | -2.140815 |

HF=-3453.6662317\ZeroPoint=0.461132\Thermal=0.5037065



G = 7.0 kcal mol<sup>-1</sup>

| Center<br>Number | Atomic<br>Number | Atomic<br>Type | Coordinates (Angstroms) |           |           |
|------------------|------------------|----------------|-------------------------|-----------|-----------|
|                  |                  |                | X                       | Y         | Z         |
| 1                | 46               | 0              | -2.077512               | 0.195169  | 0.375129  |
| 2                | 46               | 0              | 0.431177                | -1.825885 | 0.399000  |
| 3                | 7                | 0              | -2.312527               | -0.962511 | -1.317923 |
| 4                | 7                | 0              | -2.938733               | -0.435572 | -2.282783 |
| 5                | 6                | 0              | -3.296706               | 0.898428  | -2.090705 |
| 6                | 6                | 0              | -2.704545               | 1.670854  | -1.054575 |
| 7                | 6                | 0              | -3.164409               | 2.980967  | -0.872497 |
| 8                | 1                | 0              | -2.699906               | 3.609708  | -0.119091 |
| 9                | 6                | 0              | -4.153226               | 3.515882  | -1.696079 |
| 10               | 6                | 0              | -4.696650               | 2.747207  | -2.729691 |
| 11               | 1                | 0              | -5.454688               | 3.172613  | -3.376881 |
| 12               | 6                | 0              | -4.266941               | 1.440039  | -2.937825 |
| 13               | 1                | 0              | -4.685352               | 0.826579  | -3.726425 |
| 14               | 6                | 0              | -1.986514               | -2.339629 | -1.440212 |
| 15               | 6                | 0              | -0.854118               | -2.851993 | -0.774260 |
| 16               | 6                | 0              | -0.584350               | -4.218671 | -0.966791 |
| 17               | 1                | 0              | 0.298127                | -4.649680 | -0.511393 |
| 18               | 6                | 0              | -1.410481               | -5.031634 | -1.733647 |
| 19               | 1                | 0              | -1.176861               | -6.085669 | -1.839216 |
| 20               | 6                | 0              | -2.538927               | -4.498967 | -2.369152 |
| 21               | 1                | 0              | -3.188004               | -5.133068 | -2.961463 |
| 22               | 6                | 0              | -2.820965               | -3.154709 | -2.233573 |
| 23               | 1                | 0              | -3.683156               | -2.714262 | -2.716126 |
| 24               | 16               | 0              | 2.090010                | -2.137477 | -1.219639 |
| 25               | 6                | 0              | 3.585984                | -1.553694 | -0.297265 |
| 26               | 1                | 0              | 3.929228                | -0.595024 | -0.694148 |
| 27               | 1                | 0              | 4.394742                | -2.258313 | -0.488739 |
| 28               | 6                | 0              | 3.357289                | -1.478542 | 1.221074  |
| 29               | 1                | 0              | 3.398325                | -2.490825 | 1.627826  |
| 30               | 6                | 0              | 4.465835                | -0.635266 | 1.840581  |
| 31               | 8                | 0              | 5.650253                | -1.267608 | 1.795968  |
| 32               | 8                | 0              | 4.306125                | 0.477051  | 2.280247  |
| 33               | 7                | 0              | 2.028137                | -0.917249 | 1.573694  |
| 34               | 1                | 0              | 1.887568                | -1.050275 | 2.571843  |
| 35               | 1                | 0              | 2.011697                | 0.096556  | 1.439289  |
| 36               | 16               | 0              | -1.432637               | -1.488571 | 1.891341  |
| 37               | 6                | 0              | -0.902319               | -0.340921 | 3.250729  |
| 38               | 1                | 0              | -0.913851               | -0.889809 | 4.190575  |
| 39               | 1                | 0              | 0.103812                | 0.031607  | 3.060511  |
| 40               | 6                | 0              | -1.864707               | 0.842340  | 3.302405  |
| 41               | 1                | 0              | -2.873696               | 0.467952  | 3.505053  |
| 42               | 7                | 0              | -1.868149               | 1.507486  | 1.982442  |
| 43               | 1                | 0              | -0.927676               | 1.887545  | 1.754252  |
| 44               | 6                | 0              | -1.544239               | 1.856171  | 4.399343  |
| 45               | 8                | 0              | -1.519053               | 3.047121  | 4.230998  |
| 46               | 8                | 0              | -1.332610               | 1.254561  | 5.586105  |
| 47               | 1                | 0              | -4.484133               | 4.538004  | -1.552329 |
| 48               | 1                | 0              | -1.164109               | 1.943457  | 6.248019  |
| 49               | 1                | 0              | -2.526424               | 2.282384  | 1.979213  |
| 50               | 1                | 0              | 6.337372                | -0.649533 | 2.090252  |
| 51               | 1                | 0              | -1.407769               | 1.641557  | -0.957176 |
| 52               | 7                | 0              | 2.353206                | 1.030197  | -2.117398 |
| 53               | 6                | 0              | 2.266379                | 1.775419  | -0.835714 |

|    |    |   |           |          |           |
|----|----|---|-----------|----------|-----------|
| 54 | 1  | 0 | 3.405495  | 1.019159 | -2.413667 |
| 55 | 1  | 0 | 1.782150  | 1.500033 | -2.821788 |
| 56 | 6  | 0 | 2.925526  | 3.171268 | -0.933011 |
| 57 | 1  | 0 | 2.847251  | 1.219431 | -0.102200 |
| 58 | 6  | 0 | 0.820423  | 1.851635 | -0.346963 |
| 59 | 16 | 0 | 2.638073  | 4.071787 | -2.510001 |
| 60 | 1  | 0 | 4.001795  | 3.055584 | -0.825198 |
| 61 | 1  | 0 | 2.548614  | 3.790353 | -0.119084 |
| 62 | 8  | 0 | -0.062954 | 1.869323 | -1.262448 |
| 63 | 8  | 0 | 0.643145  | 1.903326 | 0.886657  |
| 64 | 1  | 0 | 3.709358  | 3.526094 | -3.132920 |
| 65 | 1  | 0 | 2.029329  | 0.049392 | -2.000802 |
| 66 | 17 | 0 | 5.258718  | 1.178577 | -2.442638 |

HF=-3453.6375697\ZeroPoint=0.4575432\Thermal=0.4994312

G = 2.2 kcal mol<sup>-1</sup>

| Center<br>Number | Atomic<br>Number | Atomic<br>Type | Coordinates (Angstroms) |           |           |
|------------------|------------------|----------------|-------------------------|-----------|-----------|
|                  |                  |                | X                       | Y         | Z         |
| 1                | 46               | 0              | 2.053594                | -0.358354 | 0.167743  |
| 2                | 46               | 0              | -0.323287               | 1.740584  | 0.687597  |
| 3                | 7                | 0              | 2.564732                | 1.235067  | -1.058232 |
| 4                | 7                | 0              | 3.411726                | 0.930836  | -1.943315 |
| 5                | 6                | 0              | 3.645623                | -0.464456 | -2.001223 |
| 6                | 6                | 0              | 2.566744                | -1.375920 | -1.926169 |
| 7                | 6                | 0              | 2.827434                | -2.754000 | -1.921699 |
| 8                | 1                | 0              | 1.981462                | -3.428524 | -1.865719 |
| 9                | 6                | 0              | 4.135393                | -3.213043 | -2.011650 |
| 10               | 6                | 0              | 5.191009                | -2.299018 | -2.135868 |
| 11               | 1                | 0              | 6.207980                | -2.663591 | -2.225090 |
| 12               | 6                | 0              | 4.956106                | -0.928484 | -2.141392 |
| 13               | 1                | 0              | 5.767815                | -0.216015 | -2.219868 |
| 14               | 6                | 0              | 2.230257                | 2.602129  | -0.892064 |
| 15               | 6                | 0              | 1.044602                | 2.948337  | -0.207590 |
| 16               | 6                | 0              | 0.773178                | 4.327534  | -0.110017 |
| 17               | 1                | 0              | -0.142737               | 4.649126  | 0.368274  |
| 18               | 6                | 0              | 1.634557                | 5.290026  | -0.618938 |
| 19               | 1                | 0              | 1.390623                | 6.340859  | -0.504949 |
| 20               | 6                | 0              | 2.812245                | 4.913807  | -1.279407 |
| 21               | 1                | 0              | 3.487503                | 5.664501  | -1.672464 |
| 22               | 6                | 0              | 3.105253                | 3.575147  | -1.424868 |
| 23               | 1                | 0              | 4.004229                | 3.254122  | -1.933364 |
| 24               | 16               | 0              | -1.901324               | 2.417162  | -0.891480 |
| 25               | 6                | 0              | -3.462531               | 1.825555  | -0.089784 |
| 26               | 1                | 0              | -3.874272               | 0.978314  | -0.642891 |
| 27               | 1                | 0              | -4.202779               | 2.620705  | -0.172681 |
| 28               | 6                | 0              | -3.271511               | 1.492414  | 1.398304  |
| 29               | 1                | 0              | -3.234605               | 2.430379  | 1.956421  |
| 30               | 6                | 0              | -4.464322               | 0.672868  | 1.878052  |
| 31               | 8                | 0              | -5.585586               | 1.414951  | 1.911699  |
| 32               | 8                | 0              | -4.418277               | -0.498769 | 2.158613  |
| 33               | 7                | 0              | -2.001710               | 0.771443  | 1.668052  |
| 34               | 1                | 0              | -1.867605               | 0.739087  | 2.675617  |
| 35               | 1                | 0              | -2.043385               | -0.213714 | 1.381351  |
| 36               | 16               | 0              | 1.464905                | 0.885292  | 2.033729  |
| 37               | 6                | 0              | 0.853455                | -0.512507 | 3.090982  |

|    |    |   |           |           |           |
|----|----|---|-----------|-----------|-----------|
| 38 | 1  | 0 | 0.947329  | -0.209941 | 4.132297  |
| 39 | 1  | 0 | -0.185432 | -0.733894 | 2.856269  |
| 40 | 6  | 0 | 1.707026  | -1.740354 | 2.788649  |
| 41 | 1  | 0 | 2.749448  | -1.527492 | 3.051005  |
| 42 | 7  | 0 | 1.616562  | -2.008210 | 1.336857  |
| 43 | 1  | 0 | 0.597456  | -2.168027 | 1.094780  |
| 44 | 6  | 0 | 1.320856  | -2.995462 | 3.570974  |
| 45 | 8  | 0 | 1.364605  | -4.106348 | 3.112334  |
| 46 | 8  | 0 | 0.980889  | -2.714238 | 4.843730  |
| 47 | 1  | 0 | 4.340948  | -4.276874 | -2.013445 |
| 48 | 1  | 0 | 0.778641  | -3.550329 | 5.292451  |
| 49 | 1  | 0 | 2.136876  | -2.847664 | 1.091038  |
| 50 | 1  | 0 | -6.331874 | 0.828931  | 2.112181  |
| 51 | 1  | 0 | 1.536658  | -1.048690 | -2.050516 |
| 52 | 7  | 0 | -2.422681 | -0.668481 | -2.168664 |
| 53 | 6  | 0 | -2.529692 | -1.547559 | -0.972495 |
| 54 | 1  | 0 | -3.435569 | -0.482600 | -2.532972 |
| 55 | 1  | 0 | -1.858508 | -1.145010 | -2.875076 |
| 56 | 6  | 0 | -3.354124 | -2.819318 | -1.275423 |
| 57 | 1  | 0 | -3.090348 | -0.997922 | -0.219946 |
| 58 | 6  | 0 | -1.130814 | -1.871562 | -0.436349 |
| 59 | 16 | 0 | -3.081707 | -3.567631 | -2.934729 |
| 60 | 1  | 0 | -4.412583 | -2.576922 | -1.210081 |
| 61 | 1  | 0 | -3.114053 | -3.574570 | -0.527261 |
| 62 | 8  | 0 | -0.213614 | -2.041520 | -1.261672 |
| 63 | 8  | 0 | -1.035285 | -1.943882 | 0.827834  |
| 64 | 1  | 0 | -4.040117 | -2.825993 | -3.538504 |
| 65 | 1  | 0 | -1.989213 | 0.239565  | -1.927974 |
| 66 | 17 | 0 | -5.286749 | -0.356502 | -2.695307 |

HF=-3453.6468555\ZeroPoint=0.4609044\Thermal=0.5034792

G = -13.8 kcal mol<sup>-1</sup>

| Center Number | Atomic Number | Atomic Type | Coordinates (Angstroms) |           |           |
|---------------|---------------|-------------|-------------------------|-----------|-----------|
|               |               |             | X                       | Y         | Z         |
| 1             | 46            | 0           | -0.671400               | -0.327700 | 0.235673  |
| 2             | 46            | 0           | 2.475100                | 0.556471  | -0.598127 |
| 3             | 7             | 0           | -0.311870               | 1.506766  | 1.071097  |
| 4             | 7             | 0           | -0.834038               | 1.764292  | 2.193634  |
| 5             | 6             | 0           | -1.579310               | 0.709498  | 2.709624  |
| 6             | 6             | 0           | -1.690254               | -0.488428 | 1.956018  |
| 7             | 6             | 0           | -2.506248               | -1.494339 | 2.463577  |
| 8             | 1             | 0           | -2.681281               | -2.405140 | 1.902184  |
| 9             | 6             | 0           | -3.158924               | -1.328925 | 3.692461  |
| 10            | 6             | 0           | -3.017084               | -0.153240 | 4.432630  |
| 11            | 1             | 0           | -3.530329               | -0.040889 | 5.380281  |
| 12            | 6             | 0           | -2.227991               | 0.879369  | 3.938702  |
| 13            | 1             | 0           | -2.112223               | 1.813647  | 4.475646  |
| 14            | 6             | 0           | 0.363018                | 2.577799  | 0.410007  |
| 15            | 6             | 0           | 1.521259                | 2.330199  | -0.350003 |
| 16            | 6             | 0           | 2.093852                | 3.442619  | -0.990956 |
| 17            | 1             | 0           | 3.009113                | 3.311157  | -1.554159 |
| 18            | 6             | 0           | 1.532170                | 4.713531  | -0.912122 |
| 19            | 1             | 0           | 1.998560                | 5.539847  | -1.438311 |
| 20            | 6             | 0           | 0.379596                | 4.928314  | -0.152188 |
| 21            | 1             | 0           | -0.062350               | 5.915898  | -0.085331 |

|    |    |   |           |           |           |
|----|----|---|-----------|-----------|-----------|
| 22 | 6  | 0 | -0.198291 | 3.862656  | 0.515544  |
| 23 | 1  | 0 | -1.092284 | 3.995698  | 1.111607  |
| 24 | 16 | 0 | 4.157669  | 1.362175  | 0.818059  |
| 25 | 6  | 0 | 5.531408  | 0.344434  | 0.136370  |
| 26 | 1  | 0 | 6.365094  | 0.371715  | 0.838730  |
| 27 | 1  | 0 | 5.880462  | 0.746181  | -0.820086 |
| 28 | 6  | 0 | 5.074785  | -1.097718 | -0.081097 |
| 29 | 1  | 0 | 5.907355  | -1.692403 | -0.490173 |
| 30 | 6  | 0 | 4.708615  | -1.787477 | 1.224098  |
| 31 | 8  | 0 | 5.666521  | -1.638371 | 2.145435  |
| 32 | 8  | 0 | 3.728836  | -2.475361 | 1.422553  |
| 33 | 7  | 0 | 3.919913  | -1.113777 | -1.004887 |
| 34 | 1  | 0 | 4.253869  | -0.864689 | -1.933260 |
| 35 | 1  | 0 | 3.526296  | -2.052340 | -1.090376 |
| 36 | 16 | 0 | 0.488069  | -0.001096 | -1.888046 |
| 37 | 6  | 0 | 0.140009  | -1.697499 | -2.554098 |
| 38 | 1  | 0 | -0.769015 | -1.590224 | -3.146814 |
| 39 | 1  | 0 | 0.955084  | -2.021586 | -3.199140 |
| 40 | 6  | 0 | -0.083812 | -2.743867 | -1.454697 |
| 41 | 1  | 0 | -0.436982 | -3.670588 | -1.925442 |
| 42 | 7  | 0 | -1.078821 | -2.267694 | -0.461368 |
| 43 | 1  | 0 | -1.068812 | -2.880140 | 0.350600  |
| 44 | 6  | 0 | 1.251774  | -3.075489 | -0.799541 |
| 45 | 8  | 0 | 2.218131  | -3.395215 | -1.463068 |
| 46 | 8  | 0 | 1.248580  | -2.954586 | 0.518189  |
| 47 | 1  | 0 | -3.790538 | -2.126941 | 4.068692  |
| 48 | 1  | 0 | 2.174754  | -2.929578 | 0.861123  |
| 49 | 1  | 0 | -2.037691 | -2.322740 | -0.831238 |
| 50 | 1  | 0 | 5.380343  | -2.094371 | 2.951403  |
| 51 | 1  | 0 | -1.214446 | 1.425928  | -2.300240 |
| 52 | 8  | 0 | -2.133150 | 1.713126  | -2.061125 |
| 53 | 6  | 0 | -2.980942 | 0.765413  | -2.418378 |
| 54 | 6  | 0 | -4.323755 | 0.913875  | -1.701619 |
| 55 | 8  | 0 | -2.763019 | -0.138326 | -3.193099 |
| 56 | 6  | 0 | -4.136198 | 0.941711  | -0.173914 |
| 57 | 1  | 0 | -4.810604 | 1.832861  | -2.038139 |
| 58 | 7  | 0 | -5.165184 | -0.248204 | -2.114620 |
| 59 | 16 | 0 | -5.698389 | 0.752998  | 0.773217  |
| 60 | 1  | 0 | -3.685215 | 1.893458  | 0.099221  |
| 61 | 1  | 0 | -3.460109 | 0.149132  | 0.141500  |
| 62 | 1  | 0 | -5.089142 | -0.416942 | -3.118133 |
| 63 | 1  | 0 | -6.135696 | -0.099586 | -1.836585 |
| 64 | 1  | 0 | -4.820253 | -1.169569 | -1.600631 |
| 65 | 1  | 0 | -5.609214 | -0.594072 | 0.870647  |
| 66 | 17 | 0 | -4.280693 | -2.588640 | -0.606052 |

HF=-3453.674357\ZeroPoint=0.4605091\Thermal=0.5025925

G = 6.4 kcal mol<sup>-1</sup>

| Center Number | Atomic Number | Atomic Type | Coordinates (Angstroms) |          |           |
|---------------|---------------|-------------|-------------------------|----------|-----------|
|               |               |             | X                       | Y        | Z         |
| 1             | 46            | 0           | -0.459221               | 0.431192 | -0.331580 |
| 2             | 46            | 0           | 2.899039                | 0.089668 | -0.661984 |
| 3             | 7             | 0           | 0.534222                | 1.908478 | 0.685862  |
| 4             | 7             | 0           | 0.204604                | 2.167441 | 1.873501  |
| 5             | 6             | 0           | -0.792703               | 1.328309 | 2.376686  |

|    |    |   |           |           |           |
|----|----|---|-----------|-----------|-----------|
| 6  | 6  | 0 | -1.525124 | 0.484028  | 1.500770  |
| 7  | 6  | 0 | -2.375665 | -0.465055 | 2.077040  |
| 8  | 1  | 0 | -2.951880 | -1.131896 | 1.444628  |
| 9  | 6  | 0 | -2.525003 | -0.539870 | 3.463258  |
| 10 | 6  | 0 | -1.837312 | 0.340603  | 4.301510  |
| 11 | 1  | 0 | -1.972771 | 0.285103  | 5.375442  |
| 12 | 6  | 0 | -0.964956 | 1.281931  | 3.761207  |
| 13 | 1  | 0 | -0.390238 | 1.951406  | 4.389801  |
| 14 | 6  | 0 | 1.566859  | 2.719263  | 0.115874  |
| 15 | 6  | 0 | 2.644869  | 2.096085  | -0.532356 |
| 16 | 6  | 0 | 3.625819  | 2.948722  | -1.060631 |
| 17 | 1  | 0 | 4.499870  | 2.519101  | -1.533807 |
| 18 | 6  | 0 | 3.512944  | 4.334863  | -0.978530 |
| 19 | 1  | 0 | 4.281966  | 4.961154  | -1.418377 |
| 20 | 6  | 0 | 2.425838  | 4.922101  | -0.326174 |
| 21 | 1  | 0 | 2.339687  | 6.000348  | -0.258654 |
| 22 | 6  | 0 | 1.454726  | 4.111044  | 0.239219  |
| 23 | 1  | 0 | 0.600461  | 4.530514  | 0.756570  |
| 24 | 16 | 0 | 4.580146  | 0.291912  | 0.959269  |
| 25 | 6  | 0 | 5.430550  | -1.305417 | 0.618221  |
| 26 | 1  | 0 | 6.055267  | -1.556673 | 1.475749  |
| 27 | 1  | 0 | 6.077916  | -1.223176 | -0.260624 |
| 28 | 6  | 0 | 4.413237  | -2.416801 | 0.367089  |
| 29 | 1  | 0 | 4.940796  | -3.360607 | 0.155134  |
| 30 | 6  | 0 | 3.560828  | -2.714052 | 1.592606  |
| 31 | 8  | 0 | 4.314511  | -2.872329 | 2.687568  |
| 32 | 8  | 0 | 2.360674  | -2.883140 | 1.605561  |
| 33 | 7  | 0 | 3.545762  | -2.040641 | -0.772333 |
| 34 | 1  | 0 | 4.109311  | -2.069848 | -1.619225 |
| 35 | 1  | 0 | 2.801337  | -2.727708 | -0.902300 |
| 36 | 16 | 0 | 1.021871  | 0.274673  | -2.170971 |
| 37 | 6  | 0 | 0.322106  | -1.261376 | -2.951722 |
| 38 | 1  | 0 | -0.263431 | -0.917945 | -3.807127 |
| 39 | 1  | 0 | 1.128032  | -1.897778 | -3.312491 |
| 40 | 6  | 0 | -0.582777 | -2.043048 | -1.994559 |
| 41 | 1  | 0 | -1.160267 | -2.787076 | -2.558095 |
| 42 | 7  | 0 | -1.497618 | -1.099133 | -1.316267 |
| 43 | 1  | 0 | -2.182966 | -1.604218 | -0.742433 |
| 44 | 6  | 0 | 0.284870  | -2.826612 | -1.016488 |
| 45 | 8  | 0 | 1.161658  | -3.566858 | -1.417398 |
| 46 | 8  | 0 | 0.021873  | -2.591857 | 0.257455  |
| 47 | 1  | 0 | -3.192889 | -1.280666 | 3.888784  |
| 48 | 1  | 0 | 0.777889  | -2.899788 | 0.806997  |
| 49 | 1  | 0 | -2.063313 | -0.591318 | -2.000762 |
| 50 | 1  | 0 | 3.723764  | -3.062491 | 3.431883  |
| 51 | 1  | 0 | -2.226088 | 1.142354  | 0.489250  |
| 52 | 8  | 0 | -3.352209 | 1.704209  | 0.091189  |
| 53 | 6  | 0 | -3.893283 | 1.235173  | -0.962646 |
| 54 | 6  | 0 | -5.422118 | 0.990395  | -0.837023 |
| 55 | 8  | 0 | -3.360376 | 0.929436  | -2.034103 |
| 56 | 6  | 0 | -5.838782 | 0.615205  | 0.588739  |
| 57 | 1  | 0 | -5.954433 | 1.884928  | -1.170464 |
| 58 | 7  | 0 | -5.736234 | -0.108950 | -1.806826 |
| 59 | 16 | 0 | -7.519689 | -0.132781 | 0.715439  |
| 60 | 1  | 0 | -5.830555 | 1.515251  | 1.199462  |
| 61 | 1  | 0 | -5.129166 | -0.088885 | 1.014566  |
| 62 | 1  | 0 | -5.268566 | 0.098180  | -2.692488 |
| 63 | 1  | 0 | -6.742449 | -0.234449 | -1.918540 |

|    |    |   |           |           |           |
|----|----|---|-----------|-----------|-----------|
| 64 | 1  | 0 | -5.297648 | -1.026107 | -1.418614 |
| 65 | 1  | 0 | -7.094759 | -1.407240 | 0.563154  |
| 66 | 17 | 0 | -4.388088 | -2.381170 | -0.467973 |

HF=-3453.6392914\ZeroPoint=0.4567643\Thermal=0.4982929

G = -3.0 kcal mol<sup>-1</sup>

| Center Number | Atomic Number | Atomic Type | Coordinates (Angstroms) |           |           |
|---------------|---------------|-------------|-------------------------|-----------|-----------|
|               |               |             | X                       | Y         | Z         |
| 1             | 46            | 0           | -0.519967               | 0.474553  | -0.186848 |
| 2             | 46            | 0           | 2.833700                | 0.183677  | -0.734708 |
| 3             | 7             | 0           | 0.563903                | 1.797158  | 0.964914  |
| 4             | 7             | 0           | 0.349782                | 1.882242  | 2.198458  |
| 5             | 6             | 0           | -0.605791               | 0.972510  | 2.695174  |
| 6             | 6             | 0           | -1.671444               | 0.473682  | 1.914387  |
| 7             | 6             | 0           | -2.453561               | -0.570413 | 2.408267  |
| 8             | 1             | 0           | -3.244505               | -0.988153 | 1.796306  |
| 9             | 6             | 0           | -2.205208               | -1.082061 | 3.681976  |
| 10            | 6             | 0           | -1.194718               | -0.536123 | 4.474446  |
| 11            | 1             | 0           | -1.019544               | -0.923300 | 5.471605  |
| 12            | 6             | 0           | -0.393231               | 0.495232  | 3.987970  |
| 13            | 1             | 0           | 0.421981                | 0.904282  | 4.571823  |
| 14            | 6             | 0           | 1.551199                | 2.689987  | 0.431850  |
| 15            | 6             | 0           | 2.588788                | 2.162439  | -0.351723 |
| 16            | 6             | 0           | 3.529442                | 3.084486  | -0.832457 |
| 17            | 1             | 0           | 4.375205                | 2.726939  | -1.406165 |
| 18            | 6             | 0           | 3.411624                | 4.449546  | -0.577433 |
| 19            | 1             | 0           | 4.146983                | 5.134724  | -0.985606 |
| 20            | 6             | 0           | 2.363685                | 4.939677  | 0.205207  |
| 21            | 1             | 0           | 2.273733                | 6.000911  | 0.404956  |
| 22            | 6             | 0           | 1.435640                | 4.053562  | 0.729637  |
| 23            | 1             | 0           | 0.611026                | 4.396642  | 1.342545  |
| 24            | 16            | 0           | 4.630785                | 0.213426  | 0.764103  |
| 25            | 6             | 0           | 5.428864                | -1.353145 | 0.213778  |
| 26            | 1             | 0           | 6.098383                | -1.696988 | 1.002492  |
| 27            | 1             | 0           | 6.024668                | -1.188356 | -0.689331 |
| 28            | 6             | 0           | 4.379074                | -2.421064 | -0.086340 |
| 29            | 1             | 0           | 4.876459                | -3.342161 | -0.429145 |
| 30            | 6             | 0           | 3.598181                | -2.836038 | 1.152700  |
| 31            | 8             | 0           | 4.416137                | -3.124548 | 2.172342  |
| 32            | 8             | 0           | 2.397380                | -2.980823 | 1.225380  |
| 33            | 7             | 0           | 3.448987                | -1.917854 | -1.123338 |
| 34            | 1             | 0           | 3.958658                | -1.864356 | -2.002674 |
| 35            | 1             | 0           | 2.686597                | -2.580746 | -1.276393 |
| 36            | 16            | 0           | 0.861144                | 0.530384  | -2.053089 |
| 37            | 6             | 0           | 0.119848                | -0.892335 | -3.001639 |
| 38            | 1             | 0           | -0.502588               | -0.435292 | -3.772418 |
| 39            | 1             | 0           | 0.912341                | -1.472358 | -3.470903 |
| 40            | 6             | 0           | -0.744278               | -1.773063 | -2.098347 |
| 41            | 1             | 0           | -1.353757               | -2.448770 | -2.711848 |
| 42            | 7             | 0           | -1.614312               | -0.894658 | -1.292871 |
| 43            | 1             | 0           | -2.277861               | -1.446202 | -0.726232 |
| 44            | 6             | 0           | 0.164382                | -2.658919 | -1.253408 |
| 45            | 8             | 0           | 1.013015                | -3.557484 | -1.772714 |
| 46            | 8             | 0           | -0.023233               | -2.550513 | 0.051425  |
| 47            | 1             | 0           | -2.812660               | -1.896412 | 4.058606  |

|    |    |   |           |           |           |
|----|----|---|-----------|-----------|-----------|
| 48 | 1  | 0 | 0.753966  | -2.926858 | 0.521206  |
| 49 | 1  | 0 | -2.209789 | -0.311182 | -1.912629 |
| 50 | 1  | 0 | 3.870780  | -3.390453 | 2.928024  |
| 51 | 1  | 0 | -2.055480 | 1.049406  | 1.046675  |
| 52 | 8  | 0 | -3.300094 | 1.866629  | -0.472096 |
| 53 | 6  | 0 | -3.928483 | 1.249616  | -1.342261 |
| 54 | 6  | 0 | -5.438406 | 0.958180  | -1.049302 |
| 55 | 8  | 0 | -3.517095 | 0.771391  | -2.438598 |
| 56 | 6  | 0 | -5.732042 | 0.825236  | 0.442683  |
| 57 | 1  | 0 | -6.042740 | 1.754222  | -1.491559 |
| 58 | 7  | 0 | -5.758210 | -0.304166 | -1.797125 |
| 59 | 16 | 0 | -7.374243 | 0.079490  | 0.837216  |
| 60 | 1  | 0 | -5.704910 | 1.815859  | 0.891184  |
| 61 | 1  | 0 | -4.970591 | 0.217850  | 0.922609  |
| 62 | 1  | 0 | -5.261666 | -0.226935 | -2.694420 |
| 63 | 1  | 0 | -6.760080 | -0.458349 | -1.900155 |
| 64 | 1  | 0 | -5.315453 | -1.130357 | -1.275121 |
| 65 | 1  | 0 | -6.931613 | -1.197871 | 0.829041  |
| 66 | 17 | 0 | -4.288445 | -2.344082 | -0.157043 |

HF=-3453.6555421\ZeroPoint=0.4602898\Thermal=0.5025223

G = -21.3 kcal mol<sup>-1</sup>

Center Atomic Atomic Coordinates (Angstroms)  
Number Number Type X Y Z

|    |    |   |           |           |           |
|----|----|---|-----------|-----------|-----------|
| 1  | 46 | 0 | 1.203218  | 0.964175  | -1.079892 |
| 2  | 46 | 0 | -1.589090 | -0.632437 | -1.182501 |
| 3  | 7  | 0 | 1.718040  | -0.901024 | -1.793613 |
| 4  | 7  | 0 | 2.866337  | -1.349765 | -1.495567 |
| 5  | 6  | 0 | 3.579978  | -0.520386 | -0.634653 |
| 6  | 6  | 0 | 2.969363  | 0.671943  | -0.162582 |
| 7  | 6  | 0 | 3.674913  | 1.424912  | 0.774164  |
| 8  | 1  | 0 | 3.241577  | 2.322409  | 1.202366  |
| 9  | 6  | 0 | 4.943767  | 1.023041  | 1.208990  |
| 10 | 6  | 0 | 5.536540  | -0.142348 | 0.713982  |
| 11 | 1  | 0 | 6.520397  | -0.439449 | 1.056941  |
| 12 | 6  | 0 | 4.853126  | -0.925034 | -0.210591 |
| 13 | 1  | 0 | 5.278734  | -1.840839 | -0.604150 |
| 14 | 6  | 0 | 0.917832  | -1.703899 | -2.654545 |
| 15 | 6  | 0 | -0.480648 | -1.704142 | -2.492531 |
| 16 | 6  | 0 | -1.202532 | -2.568522 | -3.335350 |
| 17 | 1  | 0 | -2.278171 | -2.637269 | -3.224127 |
| 18 | 6  | 0 | -0.579030 | -3.339504 | -4.310370 |
| 19 | 1  | 0 | -1.176486 | -3.974052 | -4.956534 |
| 20 | 6  | 0 | 0.811524  | -3.297826 | -4.463649 |
| 21 | 1  | 0 | 1.299274  | -3.889201 | -5.229835 |
| 22 | 6  | 0 | 1.561450  | -2.492173 | -3.627398 |
| 23 | 1  | 0 | 2.639192  | -2.445077 | -3.715258 |
| 24 | 16 | 0 | -1.922814 | -2.563138 | 0.156623  |
| 25 | 6  | 0 | -3.036633 | -1.794686 | 1.426506  |
| 26 | 1  | 0 | -2.445759 | -1.373136 | 2.242761  |
| 27 | 1  | 0 | -3.672620 | -2.576773 | 1.837400  |
| 28 | 6  | 0 | -3.890473 | -0.703158 | 0.786635  |
| 29 | 1  | 0 | -4.497965 | -1.161328 | -0.002403 |
| 30 | 6  | 0 | -4.879597 | -0.033426 | 1.738976  |
| 31 | 8  | 0 | -5.495631 | -0.925143 | 2.545824  |

|    |    |   |           |           |           |
|----|----|---|-----------|-----------|-----------|
| 32 | 8  | 0 | -5.130507 | 1.144786  | 1.742665  |
| 33 | 7  | 0 | -3.013119 | 0.307024  | 0.162525  |
| 34 | 1  | 0 | -3.585800 | 1.026782  | -0.270931 |
| 35 | 1  | 0 | -2.460393 | 0.780215  | 0.896993  |
| 36 | 16 | 0 | -0.851712 | 1.335968  | -2.328236 |
| 37 | 6  | 0 | -1.376734 | 2.826887  | -1.355434 |
| 38 | 1  | 0 | -2.061304 | 3.415885  | -1.962494 |
| 39 | 1  | 0 | -1.874903 | 2.532383  | -0.433592 |
| 40 | 6  | 0 | -0.139076 | 3.649338  | -1.001489 |
| 41 | 1  | 0 | 0.365602  | 3.944665  | -1.928506 |
| 42 | 7  | 0 | 0.799316  | 2.816764  | -0.211613 |
| 43 | 1  | 0 | 0.340684  | 2.555531  | 0.685570  |
| 44 | 6  | 0 | -0.424607 | 4.948873  | -0.248524 |
| 45 | 8  | 0 | -1.541726 | 5.560856  | -0.688194 |
| 46 | 8  | 0 | 0.295785  | 5.400781  | 0.603734  |
| 47 | 1  | 0 | 5.467553  | 1.619482  | 1.947913  |
| 48 | 1  | 0 | 1.623606  | 3.363354  | 0.024233  |
| 49 | 1  | 0 | -6.127880 | -0.434414 | 3.092920  |
| 50 | 1  | 0 | 1.079208  | -0.580516 | 0.829035  |
| 51 | 7  | 0 | 0.514390  | -1.038039 | 1.557748  |
| 52 | 6  | 0 | 1.308314  | -1.993945 | 2.356423  |
| 53 | 1  | 0 | 0.081962  | -0.234380 | 2.088654  |
| 54 | 1  | 0 | -0.269618 | -1.546957 | 1.060017  |
| 55 | 6  | 0 | 2.628800  | -1.401710 | 2.877464  |
| 56 | 1  | 0 | 1.550895  | -2.843072 | 1.709608  |
| 57 | 6  | 0 | 0.431167  | -2.520435 | 3.483927  |
| 58 | 16 | 0 | 2.474101  | 0.177395  | 3.794307  |
| 59 | 1  | 0 | 3.274292  | -1.168202 | 2.031678  |
| 60 | 1  | 0 | 3.129689  | -2.155943 | 3.483378  |
| 61 | 8  | 0 | 1.038261  | -3.547428 | 4.112399  |
| 62 | 8  | 0 | -0.642088 | -2.077264 | 3.789515  |
| 63 | 1  | 0 | 1.671397  | -0.278482 | 4.779442  |
| 64 | 17 | 0 | -0.882251 | 1.605902  | 2.189738  |
| 65 | 1  | 0 | 0.453988  | -3.850799 | 4.824075  |
| 66 | 1  | 0 | -1.644136 | 6.385058  | -0.187370 |

HF=-3453.6856405\ZeroPoint=0.461322\Thermal=0.5039315

G = 1.4 kcal mol<sup>-1</sup>

Center Atomic Atomic Coordinates (Angstroms)  
Number Number Type X Y Z

|    |    |   |           |           |           |
|----|----|---|-----------|-----------|-----------|
| 1  | 46 | 0 | 0.697941  | -1.438735 | 0.661676  |
| 2  | 46 | 0 | -1.496088 | 0.640720  | 1.301561  |
| 3  | 7  | 0 | 1.695668  | -0.053625 | 1.851506  |
| 4  | 7  | 0 | 2.950389  | 0.036599  | 1.686329  |
| 5  | 6  | 0 | 3.441659  | -0.696944 | 0.604940  |
| 6  | 6  | 0 | 2.553596  | -1.144414 | -0.411680 |
| 7  | 6  | 0 | 3.087535  | -1.853732 | -1.496201 |
| 8  | 1  | 0 | 2.431390  | -2.153205 | -2.306593 |
| 9  | 6  | 0 | 4.455399  | -2.103196 | -1.573963 |
| 10 | 6  | 0 | 5.314561  | -1.636842 | -0.571458 |
| 11 | 1  | 0 | 6.379466  | -1.823955 | -0.647047 |
| 12 | 6  | 0 | 4.817407  | -0.924169 | 0.516526  |
| 13 | 1  | 0 | 5.471510  | -0.556402 | 1.297907  |
| 14 | 6  | 0 | 1.125836  | 0.694859  | 2.910632  |
| 15 | 6  | 0 | -0.227388 | 1.077761  | 2.812360  |

|                                                       |        |        |                         |           |           |    |    |   |           |           |           |
|-------------------------------------------------------|--------|--------|-------------------------|-----------|-----------|----|----|---|-----------|-----------|-----------|
| 16                                                    | 6      | 0      | -0.727081               | 1.869388  | 3.861942  |    |    |   |           |           |           |
| 17                                                    | 1      | 0      | -1.749199               | 2.225128  | 3.813156  | 1  | 46 | 0 | -1.278100 | -1.316362 | 0.425922  |
| 18                                                    | 6      | 0      | 0.053541                | 2.210881  | 4.959758  | 2  | 46 | 0 | 0.266171  | 1.442522  | 1.295146  |
| 19                                                    | 1      | 0      | -0.376137               | 2.803451  | 5.760620  | 3  | 7  | 0 | 0.519611  | -1.936170 | 1.249450  |
| 20                                                    | 6      | 0      | 1.389522                | 1.793567  | 5.041062  | 4  | 7  | 0 | 0.818777  | -3.111777 | 0.898761  |
| 21                                                    | 1      | 0      | 1.994142                | 2.052109  | 5.902451  | 5  | 6  | 0 | -0.062387 | -3.618710 | -0.092201 |
| 22                                                    | 6      | 0      | 1.931297                | 1.048533  | 4.013247  | 6  | 6  | 0 | -0.453386 | -2.810520 | -1.188138 |
| 23                                                    | 1      | 0      | 2.961552                | 0.719420  | 4.043259  | 7  | 6  | 0 | -1.358665 | -3.335538 | -2.125937 |
| 24                                                    | 16     | 0      | -1.245997               | 2.834935  | 0.506653  | 8  | 1  | 0 | -1.645432 | -2.718399 | -2.970131 |
| 25                                                    | 6      | 0      | -2.289798               | 2.664737  | -1.014292 | 9  | 6  | 0 | -1.848901 | -4.626234 | -1.981982 |
| 26                                                    | 1      | 0      | -1.695560               | 2.273330  | -1.842630 | 10 | 6  | 0 | -1.413316 | -5.426127 | -0.915350 |
| 27                                                    | 1      | 0      | -2.643424               | 3.656651  | -1.291255 | 11 | 1  | 0 | -1.782960 | -6.440754 | -0.820195 |
| 28                                                    | 6      | 0      | -3.467589               | 1.741819  | -0.729089 | 12 | 6  | 0 | -0.514119 | -4.936930 | 0.024203  |
| 29                                                    | 1      | 0      | -4.054044               | 2.176217  | 0.089247  | 13 | 1  | 0 | -0.180783 | -5.543859 | 0.856956  |
| 30                                                    | 6      | 0      | -4.451538               | 1.551783  | -1.883095 | 14 | 6  | 0 | 1.303125  | -1.321030 | 2.261653  |
| 31                                                    | 8      | 0      | -4.591480               | 2.662376  | -2.636217 | 15 | 6  | 0 | 1.273559  | 0.084062  | 2.418890  |
| 32                                                    | 8      | 0      | -5.083239               | 0.542038  | -2.068665 | 16 | 6  | 0 | 2.079912  | 0.599256  | 3.454414  |
| 33                                                    | 7      | 0      | -2.961531               | 0.425713  | -0.279041 | 17 | 1  | 0 | 2.118070  | 1.671539  | 3.601742  |
| 34                                                    | 1      | 0      | -3.754910               | -0.172529 | -0.061560 | 18 | 6  | 0 | 2.838958  | -0.215671 | 4.282527  |
| 35                                                    | 1      | 0      | -2.466997               | -0.025499 | -1.072110 | 19 | 1  | 0 | 3.433036  | 0.228549  | 5.074262  |
| 36                                                    | 16     | 0      | -1.271350               | -1.679444 | 1.933244  | 20 | 6  | 0 | 2.842833  | -1.606001 | 4.102569  |
| 37                                                    | 6      | 0      | -2.176986               | -2.738100 | 0.705011  | 21 | 1  | 0 | 3.429646  | -2.244695 | 4.752160  |
| 38                                                    | 1      | 0      | -2.959337               | -3.277853 | 1.235211  | 22 | 6  | 0 | 2.083039  | -2.156628 | 3.093123  |
| 39                                                    | 1      | 0      | -2.624552               | -2.124064 | -0.073660 | 23 | 1  | 0 | 2.060893  | -3.226358 | 2.934832  |
| 40                                                    | 6      | 0      | -1.179417               | -3.700524 | 0.073582  | 24 | 16 | 0 | 2.320016  | 2.338369  | 0.630333  |
| 41                                                    | 1      | 0      | -0.739154               | -4.323863 | 0.860316  | 25 | 6  | 0 | 1.686970  | 3.371911  | -0.760601 |
| 42                                                    | 7      | 0      | -0.093360               | -2.915962 | -0.559488 | 26 | 1  | 0 | 1.538494  | 2.759847  | -1.653319 |
| 43                                                    | 1      | 0      | -0.485665               | -2.353638 | -1.359780 | 27 | 1  | 0 | 2.440346  | 4.123823  | -0.991732 |
| 44                                                    | 6      | 0      | -1.761604               | -4.675324 | -0.951516 | 28 | 6  | 0 | 0.382724  | 4.033848  | -0.335551 |
| 45                                                    | 8      | 0      | -3.043425               | -4.995199 | -0.692003 | 29 | 1  | 0 | 0.587576  | 4.640776  | 0.554390  |
| 46                                                    | 8      | 0      | -1.120345               | -5.140668 | -1.857150 | 30 | 6  | 0 | -0.243651 | 4.989169  | -1.349653 |
| 47                                                    | 1      | 0      | 4.861332                | -2.636760 | -2.425533 | 31 | 8  | 0 | 0.679655  | 5.662609  | -2.066542 |
| 48                                                    | 1      | 0      | 0.606355                | -3.543965 | -0.948657 | 32 | 8  | 0 | -1.430346 | 5.170528  | -1.460831 |
| 49                                                    | 1      | 0      | -5.247504               | 2.467307  | -3.322975 | 33 | 7  | 0 | -0.595795 | 2.990845  | 0.044250  |
| 50                                                    | 1      | 0      | 1.706725                | -0.273355 | -0.754807 | 34 | 1  | 0 | -1.430201 | 3.443306  | 0.408691  |
| 51                                                    | 7      | 0      | 1.079253                | 1.037388  | -1.323191 | 35 | 1  | 0 | -0.897670 | 2.475024  | -0.803840 |
| 52                                                    | 6      | 0      | 1.967961                | 2.186589  | -1.395226 | 36 | 16 | 0 | -1.772234 | 0.371485  | 1.931296  |
| 53                                                    | 1      | 0      | 0.697728                | 0.759957  | -2.229484 | 37 | 6  | 0 | -3.197639 | 1.094935  | 0.990003  |
| 54                                                    | 1      | 0      | 0.282536                | 1.268664  | -0.723516 | 38 | 1  | 0 | -3.798194 | 1.678214  | 1.685768  |
| 55                                                    | 6      | 0      | 3.313110                | 1.848868  | -2.071266 | 39 | 1  | 0 | -2.834919 | 1.728717  | 0.183499  |
| 56                                                    | 1      | 0      | 2.187974                | 2.512705  | -0.374309 | 40 | 6  | 0 | -3.997458 | -0.056234 | 0.392845  |
| 57                                                    | 6      | 0      | 1.312569                | 3.367989  | -2.106699 | 41 | 1  | 0 | -4.365173 | -0.698193 | 1.201477  |
| 58                                                    | 16     | 0      | 3.183352                | 1.030473  | -3.713365 | 42 | 7  | 0 | -3.091066 | -0.851921 | -0.465826 |
| 59                                                    | 1      | 0      | 3.852738                | 1.130488  | -1.454519 | 43 | 1  | 0 | -2.737731 | -0.247294 | -1.253252 |
| 60                                                    | 1      | 0      | 3.921095                | 2.750081  | -2.148448 | 44 | 6  | 0 | -5.230577 | 0.357829  | -0.410451 |
| 61                                                    | 8      | 0      | 1.931810                | 4.529102  | -1.795450 | 45 | 8  | 0 | -5.839341 | 1.440052  | 0.109616  |
| 62                                                    | 8      | 0      | 0.398821                | 3.288487  | -2.886106 | 46 | 8  | 0 | -5.634041 | -0.251078 | -1.366404 |
| 63                                                    | 1      | 0      | 2.483936                | 2.004361  | -4.332610 | 47 | 1  | 0 | -2.545024 | -5.029683 | -2.707913 |
| 64                                                    | 17     | 0      | -1.215253               | -0.924541 | -2.578495 | 48 | 1  | 0 | -3.586668 | -1.642249 | -0.872892 |
| 65                                                    | 1      | 0      | 1.485884                | 5.241052  | -2.278921 | 49 | 1  | 0 | 0.205747  | 6.264416  | -2.660924 |
| 66                                                    | 1      | 0      | -3.335486               | -5.626438 | -1.368256 | 50 | 1  | 0 | 0.128508  | -1.901850 | -1.419984 |
| -----                                                 |        |        |                         |           |           |    |    |   |           |           |           |
| HF=-3453.6435994\ZeroPoint=0.456923\Thermal=0.4995063 |        |        |                         |           |           |    |    |   |           |           |           |
| G = -1.6 kcal mol <sup>-1</sup>                       |        |        |                         |           |           |    |    |   |           |           |           |
| -----                                                 |        |        |                         |           |           |    |    |   |           |           |           |
| Center                                                | Atomic | Atomic | Coordinates (Angstroms) |           |           |    |    |   |           |           |           |
| Number                                                | Number | Type   | X                       | Y         | Z         |    |    |   |           |           |           |
|                                                       |        |        |                         |           |           | 51 | 7  | 0 | 1.508882  | -0.456181 | -1.684783 |
|                                                       |        |        |                         |           |           | 52 | 6  | 0 | 2.862527  | -0.608220 | -1.193473 |
|                                                       |        |        |                         |           |           | 53 | 1  | 0 | 1.497922  | -0.320471 | -2.691593 |
|                                                       |        |        |                         |           |           | 54 | 1  | 0 | 1.061551  | 0.362126  | -1.283026 |
|                                                       |        |        |                         |           |           | 55 | 6  | 0 | 3.409839  | -2.021759 | -1.462081 |
|                                                       |        |        |                         |           |           | 56 | 1  | 0 | 2.852038  | -0.472609 | -0.108179 |
|                                                       |        |        |                         |           |           | 57 | 6  | 0 | 3.823524  | 0.455099  | -1.726376 |

```

58 16 0 3.421129 -2.531707 -3.233355
59 1 0 2.757324 -2.744955 -0.972226
60 1 0 4.411801 -2.130237 -1.049192
61 8 0 5.042438 0.361688 -1.139333
62 8 0 3.569836 1.262085 -2.583938
63 1 0 4.380128 -1.674931 -3.641583
64 17 0 -1.520683 1.011876 -2.291609
65 1 0 5.589343 1.080510 -1.489328
66 1 0 -6.619857 1.634392 -0.432713
-----
HF=-3453.6486707\ZeroPoint=0.4593555\Thermal=0.5029643

```

G = -6.9 kcal mol<sup>-1</sup>

```

-----
Center Atomic Atomic Coordinates (Angstroms)
Number Number Type X Y Z
-----
1 46 0 -0.409612 -1.452845 0.243728
2 46 0 1.429458 1.388993 -0.178304
3 7 0 -0.130714 -0.571091 2.068142
4 7 0 0.055231 -1.313140 3.075263
5 6 0 0.063678 -2.665820 2.760949
6 6 0 -0.174522 -3.059228 1.416450
7 6 0 -0.215861 -4.423154 1.148833
8 1 0 -0.425660 -4.788372 0.148952
9 6 0 -0.003688 -5.357805 2.170359
10 6 0 0.247841 -4.950476 3.483549
11 1 0 0.410045 -5.687950 4.260395
12 6 0 0.277011 -3.595460 3.787552
13 1 0 0.454896 -3.242051 4.796527
14 6 0 -0.294288 0.828274 2.319087
15 6 0 0.270879 1.776561 1.444412
16 6 0 0.007265 3.126473 1.748021
17 1 0 0.466059 3.897007 1.140216
18 6 0 -0.802200 3.507597 2.817382
19 1 0 -0.985199 4.560043 3.007511
20 6 0 -1.362254 2.539449 3.656285
21 1 0 -1.983226 2.827955 4.496513
22 6 0 -1.091850 1.199190 3.415762
23 1 0 -1.492996 0.424691 4.058441
24 16 0 3.254555 2.158529 1.061680
25 6 0 4.346125 2.563853 -0.365889
26 1 0 5.370845 2.647239 -0.003057
27 1 0 4.064278 3.522634 -0.811589
28 6 0 4.252869 1.482872 -1.440649
29 1 0 4.893718 1.754773 -2.294312
30 6 0 4.782855 0.135521 -0.970519
31 8 0 5.975332 0.255539 -0.376519
32 8 0 4.263280 -0.941244 -1.169008
33 7 0 2.844201 1.343891 -1.875216
34 1 0 2.592962 2.174842 -2.406456
35 1 0 2.732109 0.556029 -2.517107
36 16 0 -0.646594 0.552472 -1.118403
37 6 0 -0.830181 -0.320714 -2.746413
38 1 0 -1.901807 -0.433215 -2.915752
39 1 0 -0.399243 0.288564 -3.538139
40 6 0 -0.170730 -1.703444 -2.731482
41 1 0 -0.456218 -2.218729 -3.657944

```

```

42 7 0 -0.640188 -2.485129 -1.561365
43 1 0 -0.136576 -3.366709 -1.517475
44 6 0 1.343692 -1.544919 -2.751163
45 8 0 1.897886 -0.802382 -3.537508
46 8 0 1.973101 -2.257092 -1.826224
47 1 0 -0.039573 -6.416792 1.936971
48 1 0 2.891454 -1.920926 -1.720502
49 1 0 -1.650503 -2.705209 -1.715052
50 1 0 6.267222 -0.628414 -0.106324
51 1 0 -2.170916 1.092879 0.331522
52 7 0 -3.093144 1.312821 0.769421
53 6 0 -4.013219 1.772300 -0.328465
54 1 0 -3.431509 0.433924 1.167634
55 1 0 -2.960935 2.012955 1.507196
56 6 0 -3.495824 3.054811 -0.968236
57 1 0 -4.993418 1.936533 0.125398
58 6 0 -4.133535 0.617619 -1.352285
59 16 0 -3.428126 4.482551 0.192455
60 1 0 -4.176672 3.324810 -1.773154
61 1 0 -2.513930 2.890785 -1.411155
62 8 0 -4.215193 0.835661 -2.535168
63 8 0 -4.137348 -0.541590 -0.732212
64 1 0 -2.180908 4.250892 0.651260
65 1 0 -4.041121 -1.368474 -1.375004
66 17 0 -3.607175 -2.840173 -2.355799

```

HF=-3453.6685749\ZeroPoint=0.4605407\Thermal=0.5025752

G = 6.8 kcal mol<sup>-1</sup>

```

-----
Center Atomic Atomic Coordinates (Angstroms)
Number Number Type X Y Z
-----
1 46 0 -0.906150 -0.127325 -0.092924
2 46 0 2.401816 0.524421 -0.715579
3 7 0 -0.157925 1.350880 1.144896
4 7 0 -0.384018 1.283884 2.384257
5 6 0 -1.142301 0.172200 2.759879
6 6 0 -1.852191 -0.564931 1.771242
7 6 0 -2.516037 -1.728268 2.178132
8 1 0 -3.066323 -2.325831 1.458114
9 6 0 -2.491797 -2.122856 3.518600
10 6 0 -1.823368 -1.358346 4.477628
11 1 0 -1.824092 -1.669962 5.515768
12 6 0 -1.146786 -0.198301 4.104711
13 1 0 -0.600320 0.398819 4.824866
14 6 0 0.566888 2.498152 0.691124
15 6 0 1.644773 2.328977 -0.192075
16 6 0 2.278955 3.503961 -0.625503
17 1 0 3.137721 3.428191 -1.280508
18 6 0 1.848822 4.764780 -0.218930
19 1 0 2.352509 5.649296 -0.593700
20 6 0 0.790451 4.896993 0.684138
21 1 0 0.467271 5.876306 1.017158
22 6 0 0.157002 3.758029 1.156501
23 1 0 -0.656834 3.822726 1.868726
24 16 0 4.175208 0.974771 0.749890
25 6 0 5.354315 -0.274115 0.085236

```

|                                                        |        |        |                         |           |           |       |    |   |           |           |           |  |
|--------------------------------------------------------|--------|--------|-------------------------|-----------|-----------|-------|----|---|-----------|-----------|-----------|--|
| 26                                                     | 1      | 0      | 6.127239                | -0.453918 | 0.832787  | 10    | 6  | 0 | -0.566447 | -2.881499 | 4.147436  |  |
| 27                                                     | 1      | 0      | 5.839540                | 0.093535  | -0.824165 | 11    | 1  | 0 | -0.107863 | -3.417389 | 4.970608  |  |
| 28                                                     | 6      | 0      | 4.628117                | -1.576821 | -0.243774 | 12    | 6  | 0 | -0.271147 | -1.532484 | 3.958690  |  |
| 29                                                     | 1      | 0      | 5.344149                | -2.309186 | -0.648283 | 13    | 1  | 0 | 0.421774  | -1.006817 | 4.603907  |  |
| 30                                                     | 6      | 0      | 4.042459                | -2.239840 | 0.995312  | 14    | 6  | 0 | 0.075573  | 2.172544  | 1.230427  |  |
| 31                                                     | 8      | 0      | 4.959097                | -2.355305 | 1.964203  | 15    | 6  | 0 | 1.108957  | 2.420657  | 0.315429  |  |
| 32                                                     | 8      | 0      | 2.923716                | -2.691217 | 1.105538  | 16    | 6  | 0 | 1.458310  | 3.765587  | 0.124726  |  |
| 33                                                     | 7      | 0      | 3.554452                | -1.304474 | -1.227485 | 17    | 1  | 0 | 2.273832  | 4.010627  | -0.543974 |  |
| 34                                                     | 1      | 0      | 3.994512                | -1.076950 | -2.116598 | 18    | 6  | 0 | 0.794150  | 4.795110  | 0.788495  |  |
| 35                                                     | 1      | 0      | 2.997521                | -2.145410 | -1.392344 | 19    | 1  | 0 | 1.078307  | 5.824556  | 0.599534  |  |
| 36                                                     | 16     | 0      | 0.379882                | 0.373377  | -2.012062 | 20    | 6  | 0 | -0.222544 | 4.511141  | 1.703863  |  |
| 37                                                     | 6      | 0      | 0.049893                | -1.178845 | -2.983770 | 21    | 1  | 0 | -0.731651 | 5.311081  | 2.228678  |  |
| 38                                                     | 1      | 0      | -0.681562               | -0.904857 | -3.746244 | 22    | 6  | 0 | -0.576345 | 3.190539  | 1.938335  |  |
| 39                                                     | 1      | 0      | 0.963572                | -1.510820 | -3.473000 | 23    | 1  | 0 | -1.359572 | 2.930206  | 2.639266  |  |
| 40                                                     | 6      | 0      | -0.523812               | -2.288160 | -2.097871 | 24    | 16 | 0 | 3.916404  | 1.418791  | 0.836729  |  |
| 41                                                     | 1      | 0      | -0.932386               | -3.090434 | -2.724664 | 25    | 6  | 0 | 5.245481  | 0.549837  | -0.098453 |  |
| 42                                                     | 7      | 0      | -1.603594               | -1.714610 | -1.263233 | 26    | 1  | 0 | 6.071862  | 0.347385  | 0.583080  |  |
| 43                                                     | 1      | 0      | -2.103887               | -2.463252 | -0.749308 | 27    | 1  | 0 | 5.621311  | 1.179633  | -0.910511 |  |
| 44                                                     | 6      | 0      | 0.605798                | -2.908332 | -1.286901 | 28    | 6  | 0 | 4.725451  | -0.755438 | -0.696699 |  |
| 45                                                     | 8      | 0      | 1.595251                | -3.348773 | -1.839007 | 29    | 1  | 0 | 5.529305  | -1.245737 | -1.267821 |  |
| 46                                                     | 8      | 0      | 0.432468                | -2.868816 | 0.023550  | 30    | 6  | 0 | 4.324688  | -1.768728 | 0.366771  |  |
| 47                                                     | 1      | 0      | -3.008922               | -3.029097 | 3.813153  | 31    | 8  | 0 | 5.286791  | -1.919831 | 1.284164  |  |
| 48                                                     | 1      | 0      | 1.295416                | -3.033464 | 0.465614  | 32    | 8  | 0 | 3.310655  | -2.431771 | 0.373231  |  |
| 49                                                     | 1      | 0      | -2.326813               | -1.353602 | -1.892259 | 33    | 7  | 0 | 3.568441  | -0.465672 | -1.575825 |  |
| 50                                                     | 1      | 0      | 4.539375                | -2.785915 | 2.724248  | 34    | 1  | 0 | 3.913492  | 0.027785  | -2.396479 |  |
| 51                                                     | 1      | 0      | -2.666048               | 0.277276  | 1.059364  | 35    | 1  | 0 | 3.151687  | -1.333516 | -1.918366 |  |
| 52                                                     | 7      | 0      | -3.791376               | 1.155451  | 0.889449  | 36    | 16 | 0 | 0.092230  | 0.684970  | -1.802117 |  |
| 53                                                     | 6      | 0      | -4.283279               | 1.307987  | -0.501859 | 37    | 6  | 0 | -0.049286 | -0.605222 | -3.141569 |  |
| 54                                                     | 1      | 0      | -4.496753               | 0.700022  | 1.463664  | 38    | 1  | 0 | -0.879058 | -0.283077 | -3.772351 |  |
| 55                                                     | 1      | 0      | -3.580985               | 2.075721  | 1.278725  | 39    | 1  | 0 | 0.868128  | -0.623049 | -3.726640 |  |
| 56                                                     | 6      | 0      | -3.365947               | 2.205954  | -1.334104 | 40    | 6  | 0 | -0.355220 | -1.981065 | -2.546077 |  |
| 57                                                     | 1      | 0      | -5.294074               | 1.734140  | -0.485343 | 41    | 1  | 0 | -0.673348 | -2.667266 | -3.340870 |  |
| 58                                                     | 6      | 0      | -4.381273               | -0.097060 | -1.119524 | 42    | 7  | 0 | -1.437537 | -1.812933 | -1.555616 |  |
| 59                                                     | 16     | 0      | -3.162507               | 3.891154  | -0.602621 | 43    | 1  | 0 | -1.810194 | -2.706966 | -1.180543 |  |
| 60                                                     | 1      | 0      | -3.789238               | 2.308166  | -2.330965 | 44    | 6  | 0 | 0.925351  | -2.558681 | -1.954105 |  |
| 61                                                     | 1      | 0      | -2.380297               | 1.754594  | -1.440900 | 45    | 8  | 0 | 1.939057  | -2.636170 | -2.618972 |  |
| 62                                                     | 8      | 0      | -3.986451               | -0.337483 | -2.243322 | 46    | 8  | 0 | 0.836260  | -2.900954 | -0.678193 |  |
| 63                                                     | 8      | 0      | -4.883883               | -0.957261 | -0.264659 | 47    | 1  | 0 | -1.660798 | -4.594686 | 3.436896  |  |
| 64                                                     | 1      | 0      | -1.836554               | 3.810033  | -0.370186 | 48    | 1  | 0 | 1.742314  | -2.993974 | -0.309171 |  |
| 65                                                     | 1      | 0      | -4.683358               | -1.947701 | -0.505276 | 49    | 1  | 0 | -2.258677 | -1.401858 | -2.019839 |  |
| 66                                                     | 17     | 0      | -3.911811               | -3.662217 | -0.535020 | 50    | 1  | 0 | 4.988806  | -2.580372 | 1.927771  |  |
| -----                                                  |        |        |                         |           |           |       |    |   |           |           |           |  |
| HF=-3453.6394624\ZeroPoint=0.4564283\Thermal=0.4979191 |        |        |                         |           |           |       |    |   |           |           |           |  |
| G = -3.3 kcal mol <sup>-1</sup>                        |        |        |                         |           |           |       |    |   |           |           |           |  |
| -----                                                  |        |        |                         |           |           |       |    |   |           |           |           |  |
| Center                                                 | Atomic | Atomic | Coordinates (Angstroms) |           |           |       |    |   |           |           |           |  |
| Number                                                 | Number | Type   | X                       | Y         | Z         |       |    |   |           |           |           |  |
| -----                                                  |        |        |                         |           |           |       |    |   |           |           |           |  |
| 1                                                      | 46     | 0      | -0.896883               | -0.478841 | -0.052074 | 59    | 16 | 0 | -3.487976 | 4.119604  | -0.624197 |  |
| 2                                                      | 46     | 0      | 2.154412                | 0.955683  | -0.625889 | 60    | 1  | 0 | -3.836920 | 2.380708  | -2.228664 |  |
| 3                                                      | 7      | 0      | -0.339459               | 0.820437  | 1.466814  | 61    | 1  | 0 | -2.384129 | 2.072090  | -1.290717 |  |
| 4                                                      | 7      | 0      | -0.406528               | 0.468497  | 2.666769  | 62    | 8  | 0 | -3.747846 | -0.218842 | -2.100249 |  |
| 5                                                      | 6      | 0      | -0.843103               | -0.854881 | 2.882304  | 63    | 8  | 0 | -4.472524 | -0.951114 | -0.098138 |  |
| 6                                                      | 6      | 0      | -1.767427               | -1.507638 | 2.038558  | 64    | 1  | 0 | -2.379721 | 4.066002  | 0.142064  |  |
| 7                                                      | 6      | 0      | -2.054284               | -2.858049 | 2.236297  | 65    | 1  | 0 | -4.308925 | -1.900138 | -0.440996 |  |
| 8                                                      | 1      | 0      | -2.752011               | -3.353270 | 1.568382  | 66    | 17 | 0 | -3.670223 | -3.723566 | -0.732435 |  |
| 9                                                      | 6      | 0      | -1.440109               | -3.544853 | 3.284413  | ----- |    |   |           |           |           |  |

HF=-3453.6565132\ZeroPoint=0.4598658\Thermal=0.5022117 52 17 0 -0.377756 1.645696 2.216224

G = -0.0 kcal mol<sup>-1</sup>

| Center Number | Atomic Number | Atomic Type | Coordinates (Angstroms) |           |           |
|---------------|---------------|-------------|-------------------------|-----------|-----------|
|               |               |             | X                       | Y         | Z         |
| 1             | 46            | 0           | 1.575974                | 0.387536  | -0.385450 |
| 2             | 46            | 0           | -1.379721               | -0.985288 | -0.505442 |
| 3             | 7             | 0           | 1.832299                | -1.618709 | -0.004355 |
| 4             | 7             | 0           | 2.731550                | -1.950982 | 0.818359  |
| 5             | 6             | 0           | 3.371062                | -0.869517 | 1.413541  |
| 6             | 6             | 0           | 2.982461                | 0.444420  | 1.048859  |
| 7             | 6             | 0           | 3.604168                | 1.505491  | 1.697201  |
| 8             | 1             | 0           | 3.325852                | 2.533082  | 1.481550  |
| 9             | 6             | 0           | 4.590240                | 1.271664  | 2.665473  |
| 10            | 6             | 0           | 4.969810                | -0.028895 | 3.001346  |
| 11            | 1             | 0           | 5.732982                | -0.195650 | 3.752060  |
| 12            | 6             | 0           | 4.356965                | -1.110308 | 2.376726  |
| 13            | 1             | 0           | 4.620717                | -2.132237 | 2.622303  |
| 14            | 6             | 0           | 1.165142                | -2.670145 | -0.698549 |
| 15            | 6             | 0           | -0.203853               | -2.547602 | -0.996011 |
| 16            | 6             | 0           | -0.798950               | -3.633876 | -1.658669 |
| 17            | 1             | 0           | -1.860336               | -3.603210 | -1.873626 |
| 18            | 6             | 0           | -0.065723               | -4.754502 | -2.037189 |
| 19            | 1             | 0           | -0.558003               | -5.564294 | -2.565474 |
| 20            | 6             | 0           | 1.297889                | -4.842312 | -1.739374 |
| 21            | 1             | 0           | 1.872391                | -5.711675 | -2.037473 |
| 22            | 6             | 0           | 1.911942                | -3.805795 | -1.058920 |
| 23            | 1             | 0           | 2.964367                | -3.846699 | -0.808489 |
| 24            | 16            | 0           | -2.391659               | -2.336154 | 1.115052  |
| 25            | 6             | 0           | -3.367676               | -1.002410 | 1.926819  |
| 26            | 1             | 0           | -2.738249               | -0.432584 | 2.617639  |
| 27            | 1             | 0           | -4.175698               | -1.463222 | 2.496461  |
| 28            | 6             | 0           | -3.955536               | -0.049399 | 0.878214  |
| 29            | 1             | 0           | -4.594544               | -0.629492 | 0.208781  |
| 30            | 6             | 0           | -4.790060               | 1.045807  | 1.527814  |
| 31            | 8             | 0           | -5.920133               | 0.550079  | 2.073765  |
| 32            | 8             | 0           | -4.488226               | 2.213935  | 1.574094  |
| 33            | 7             | 0           | -2.855212               | 0.541561  | 0.082775  |
| 34            | 1             | 0           | -3.240011               | 1.034833  | -0.718538 |
| 35            | 1             | 0           | -2.396049               | 1.248254  | 0.657823  |
| 36            | 16            | 0           | -0.122816               | 0.288880  | -2.127500 |
| 37            | 6             | 0           | -0.553849               | 2.084169  | -1.997544 |
| 38            | 1             | 0           | -1.093879               | 2.389985  | -2.893202 |
| 39            | 1             | 0           | -1.186374               | 2.269671  | -1.126727 |
| 40            | 6             | 0           | 0.733128                | 2.907414  | -1.864913 |
| 41            | 1             | 0           | 1.361901                | 2.714840  | -2.737419 |
| 42            | 7             | 0           | 1.478801                | 2.483934  | -0.653323 |
| 43            | 1             | 0           | 1.026734                | 2.884026  | 0.171650  |
| 44            | 6             | 0           | 0.434544                | 4.401178  | -1.799031 |
| 45            | 8             | 0           | 0.611753                | 5.091083  | -0.827134 |
| 46            | 8             | 0           | -0.069842               | 4.851919  | -2.962933 |
| 47            | 1             | 0           | 5.058766                | 2.113623  | 3.163977  |
| 48            | 1             | 0           | -0.263797               | 5.797050  | -2.863647 |
| 49            | 1             | 0           | 2.417454                | 2.875892  | -0.668016 |
| 50            | 1             | 0           | -6.391499               | 1.283001  | 2.498428  |
| 51            | 1             | 0           | 0.272347                | 0.791892  | 1.445062  |

HF=-2731.5388628\ZeroPoint=0.3599254\Thermal=0.3938556

G = 12.4 kcal mol<sup>-1</sup>

| Center Number | Atomic Number | Atomic Type | Coordinates (Angstroms) |           |           |
|---------------|---------------|-------------|-------------------------|-----------|-----------|
|               |               |             | X                       | Y         | Z         |
| 1             | 46            | 0           | 1.217053                | 0.671908  | -0.368033 |
| 2             | 46            | 0           | -1.111009               | -1.325812 | -0.569732 |
| 3             | 7             | 0           | 2.002100                | -1.191679 | 0.058143  |
| 4             | 7             | 0           | 2.921262                | -1.248106 | 0.921632  |
| 5             | 6             | 0           | 3.239292                | -0.029707 | 1.516008  |
| 6             | 6             | 0           | 2.422469                | 1.119229  | 1.322058  |
| 7             | 6             | 0           | 2.873948                | 2.329923  | 1.861182  |
| 8             | 1             | 0           | 2.249539                | 3.213696  | 1.778223  |
| 9             | 6             | 0           | 4.061832                | 2.399463  | 2.587521  |
| 10            | 6             | 0           | 4.826160                | 1.249142  | 2.799885  |
| 11            | 1             | 0           | 5.739896                | 1.304887  | 3.379757  |
| 12            | 6             | 0           | 4.415710                | 0.030698  | 2.269692  |
| 13            | 1             | 0           | 5.000371                | -0.871111 | 2.405261  |
| 14            | 6             | 0           | 1.686489                | -2.395656 | -0.633004 |
| 15            | 6             | 0           | 0.353416                | -2.622924 | -1.023460 |
| 16            | 6             | 0           | 0.086831                | -3.834896 | -1.676671 |
| 17            | 1             | 0           | -0.932242               | -4.068939 | -1.960702 |
| 18            | 6             | 0           | 1.099187                | -4.747273 | -1.958792 |
| 19            | 1             | 0           | 0.862124                | -5.666739 | -2.483782 |
| 20            | 6             | 0           | 2.419488                | -4.489111 | -1.570079 |
| 21            | 1             | 0           | 3.206870                | -5.198794 | -1.795593 |
| 22            | 6             | 0           | 2.714902                | -3.318876 | -0.894517 |
| 23            | 1             | 0           | 3.724665                | -3.095155 | -0.575138 |
| 24            | 16            | 0           | -1.783092               | -2.798180 | 1.110356  |
| 25            | 6             | 0           | -2.783323               | -1.585565 | 2.072710  |
| 26            | 1             | 0           | -2.131053               | -0.959652 | 2.687952  |
| 27            | 1             | 0           | -3.456821               | -2.139287 | 2.726615  |
| 28            | 6             | 0           | -3.590547               | -0.700365 | 1.122584  |
| 29            | 1             | 0           | -4.228556               | -1.349761 | 0.514076  |
| 30            | 6             | 0           | -4.507743               | 0.295442  | 1.824408  |
| 31            | 8             | 0           | -5.283495               | -0.301466 | 2.753552  |
| 32            | 8             | 0           | -4.570965               | 1.472762  | 1.567504  |
| 33            | 7             | 0           | -2.662522               | 0.012379  | 0.216480  |
| 34            | 1             | 0           | -3.203835               | 0.556588  | -0.449708 |
| 35            | 1             | 0           | -2.127565               | 0.684663  | 0.776205  |
| 36            | 16            | 0           | -0.092531               | 0.092672  | -2.261176 |
| 37            | 6             | 0           | -0.991516               | 1.709147  | -2.375041 |
| 38            | 1             | 0           | -1.381823               | 1.816058  | -3.386105 |
| 39            | 1             | 0           | -1.828397               | 1.729867  | -1.675371 |
| 40            | 6             | 0           | -0.028788               | 2.853342  | -2.056375 |
| 41            | 1             | 0           | 0.787405                | 2.834682  | -2.783853 |
| 42            | 7             | 0           | 0.552780                | 2.643814  | -0.710354 |
| 43            | 1             | 0           | -0.147775               | 2.809308  | 0.020341  |
| 44            | 6             | 0           | -0.698171               | 4.222067  | -2.137777 |
| 45            | 8             | 0           | -0.770733               | 5.000600  | -1.222898 |
| 46            | 8             | 0           | -1.192945               | 4.451814  | -3.369534 |
| 47            | 1             | 0           | 4.380141                | 3.345664  | 3.010253  |
| 48            | 1             | 0           | -1.607040               | 5.328903  | -3.370712 |
| 49            | 1             | 0           | 1.291564                | 3.321425  | -0.536902 |



|    |    |   |           |          |          |
|----|----|---|-----------|----------|----------|
| 50 | 1  | 0 | -5.849391 | 0.380653 | 3.146090 |
| 51 | 1  | 0 | 1.044358  | 1.119267 | 1.609413 |
| 52 | 17 | 0 | -0.412266 | 1.580147 | 2.293043 |

-----

HF=-2731.5195218\ZeroPoint=0.3582909\Thermal=0.39122

G = 1.4 kcal mol<sup>-1</sup>

| Center Number | Atomic Number | Atomic Type | Coordinates (Angstroms) |           |           |
|---------------|---------------|-------------|-------------------------|-----------|-----------|
|               |               |             | X                       | Y         | Z         |
| 1             | 46            | 0           | -1.505843               | -0.198471 | -0.225631 |
| 2             | 46            | 0           | 1.379378                | 1.059635  | -0.562364 |
| 3             | 7             | 0           | -1.665906               | 1.821491  | 0.246313  |
| 4             | 7             | 0           | -2.594752               | 2.031020  | 1.068624  |
| 5             | 6             | 0           | -3.102483               | 0.798577  | 1.579616  |
| 6             | 6             | 0           | -2.216982               | -0.201786 | 2.053438  |
| 7             | 6             | 0           | -2.745901               | -1.420488 | 2.513516  |
| 8             | 1             | 0           | -2.050463               | -2.177303 | 2.857433  |
| 9             | 6             | 0           | -4.118165               | -1.626372 | 2.515430  |
| 10            | 6             | 0           | -4.984266               | -0.608378 | 2.089507  |
| 11            | 1             | 0           | -6.055996               | -0.769366 | 2.113736  |
| 12            | 6             | 0           | -4.487342               | 0.604302  | 1.630749  |
| 13            | 1             | 0           | -5.145654               | 1.392481  | 1.287050  |
| 14            | 6             | 0           | -1.026694               | 2.921680  | -0.374791 |
| 15            | 6             | 0           | 0.293649                | 2.746137  | -0.834477 |
| 16            | 6             | 0           | 0.893033                | 3.867596  | -1.432400 |
| 17            | 1             | 0           | 1.919970                | 3.799218  | -1.770766 |
| 18            | 6             | 0           | 0.207685                | 5.067214  | -1.589363 |
| 19            | 1             | 0           | 0.698168                | 5.905440  | -2.073132 |
| 20            | 6             | 0           | -1.108410               | 5.205956  | -1.126554 |
| 21            | 1             | 0           | -1.639627               | 6.141681  | -1.254479 |
| 22            | 6             | 0           | -1.725410               | 4.137521  | -0.506209 |
| 23            | 1             | 0           | -2.739592               | 4.212200  | -0.135097 |
| 24            | 16            | 0           | 2.456573                | 2.153108  | 1.186918  |
| 25            | 6             | 0           | 3.257179                | 0.654263  | 1.912309  |
| 26            | 1             | 0           | 2.538430                | 0.093445  | 2.514604  |
| 27            | 1             | 0           | 4.071864                | 0.984380  | 2.556062  |
| 28            | 6             | 0           | 3.787368                | -0.231105 | 0.792181  |
| 29            | 1             | 0           | 4.489839                | 0.360833  | 0.193451  |
| 30            | 6             | 0           | 4.561247                | -1.475899 | 1.224346  |
| 31            | 8             | 0           | 5.227665                | -1.303256 | 2.384328  |
| 32            | 8             | 0           | 4.621955                | -2.487655 | 0.570956  |
| 33            | 7             | 0           | 2.660696                | -0.624637 | -0.084102 |
| 34            | 1             | 0           | 3.026092                | -1.158098 | -0.869052 |
| 35            | 1             | 0           | 2.045953                | -1.266958 | 0.449639  |
| 36            | 16            | 0           | -0.112325               | -0.042459 | -2.077342 |
| 37            | 6             | 0           | 0.280996                | -1.852334 | -2.185444 |
| 38            | 1             | 0           | 0.666772                | -2.051067 | -3.183871 |
| 39            | 1             | 0           | 1.028318                | -2.123756 | -1.442011 |
| 40            | 6             | 0           | -1.002436               | -2.629356 | -1.919481 |
| 41            | 1             | 0           | -1.751495               | -2.347268 | -2.668265 |
| 42            | 7             | 0           | -1.509091               | -2.247203 | -0.582435 |
| 43            | 1             | 0           | -0.823218               | -2.542515 | 0.159700  |
| 44            | 6             | 0           | -0.874434               | -4.150370 | -2.005215 |
| 45            | 8             | 0           | -1.519245               | -4.909402 | -1.330561 |
| 46            | 8             | 0           | -0.004867               | -4.536858 | -2.957998 |
| 47            | 1             | 0           | -4.524680               | -2.566189 | 2.870043  |

|    |    |   |           |           |           |
|----|----|---|-----------|-----------|-----------|
| 48 | 1  | 0 | 0.009165  | -5.506707 | -2.975166 |
| 49 | 1  | 0 | -2.391089 | -2.716255 | -0.386356 |
| 50 | 1  | 0 | 5.709440  | -2.124486 | 2.567631  |
| 51 | 1  | 0 | -1.163058 | 0.008555  | 2.214574  |
| 52 | 17 | 0 | 0.601045  | -2.396617 | 1.621957  |

-----

HF=-2731.5403748\ZeroPoint=0.3627599\Thermal=0.3958884

G = -0.8 kcal mol<sup>-1</sup>

| Center Number | Atomic Number | Atomic Type | Coordinates (Angstroms) |           |           |
|---------------|---------------|-------------|-------------------------|-----------|-----------|
|               |               |             | X                       | Y         | Z         |
| 1             | 46            | 0           | -1.481865               | -0.333324 | -0.293946 |
| 2             | 46            | 0           | 1.716114                | 0.594253  | -0.500574 |
| 3             | 7             | 0           | -1.317419               | 1.485755  | 0.627624  |
| 4             | 7             | 0           | -2.010753               | 1.697090  | 1.661304  |
| 5             | 6             | 0           | -2.785700               | 0.606935  | 2.042239  |
| 6             | 6             | 0           | -2.733706               | -0.577149 | 1.262932  |
| 7             | 6             | 0           | -3.530244               | -1.643246 | 1.664090  |
| 8             | 1             | 0           | -3.549176               | -2.571485 | 1.100060  |
| 9             | 6             | 0           | -4.337495               | -1.545538 | 2.805549  |
| 10            | 6             | 0           | -4.368158               | -0.373857 | 3.563692  |
| 11            | 1             | 0           | -4.998065               | -0.311062 | 4.442953  |
| 12            | 6             | 0           | -3.590430               | 0.714143  | 3.181801  |
| 13            | 1             | 0           | -3.595534               | 1.641163  | 3.742963  |
| 14            | 6             | 0           | -0.559186               | 2.578970  | 0.113019  |
| 15            | 6             | 0           | 0.720618                | 2.357144  | -0.425443 |
| 16            | 6             | 0           | 1.389053                | 3.486966  | -0.925301 |
| 17            | 1             | 0           | 2.393015                | 3.376131  | -1.314822 |
| 18            | 6             | 0           | 0.805274                | 4.750096  | -0.922505 |
| 19            | 1             | 0           | 1.348575                | 5.592266  | -1.337980 |
| 20            | 6             | 0           | -0.469982               | 4.938787  | -0.382637 |
| 21            | 1             | 0           | -0.928824               | 5.920689  | -0.379805 |
| 22            | 6             | 0           | -1.148668               | 3.854893  | 0.145440  |
| 23            | 1             | 0           | -2.139624               | 3.965869  | 0.567068  |
| 24            | 16            | 0           | 3.084196                | 1.409021  | 1.225722  |
| 25            | 6             | 0           | 4.578758                | 0.415659  | 0.820809  |
| 26            | 1             | 0           | 5.261052                | 0.449816  | 1.670711  |
| 27            | 1             | 0           | 5.100781                | 0.825473  | -0.049643 |
| 28            | 6             | 0           | 4.190910                | -1.031172 | 0.517880  |
| 29            | 1             | 0           | 5.093970                | -1.617601 | 0.284398  |
| 30            | 6             | 0           | 3.579803                | -1.718702 | 1.729166  |
| 31            | 8             | 0           | 4.351357                | -1.580227 | 2.811821  |
| 32            | 8             | 0           | 2.572163                | -2.396357 | 1.743812  |
| 33            | 7             | 0           | 3.243311                | -1.058441 | -0.617719 |
| 34            | 1             | 0           | 3.751768                | -0.791376 | -1.457814 |
| 35            | 1             | 0           | 2.900280                | -2.004942 | -0.784577 |
| 36            | 16            | 0           | 0.015619                | 0.054115  | -2.162354 |
| 37            | 6             | 0           | -0.070274               | -1.659463 | -2.868052 |
| 38            | 1             | 0           | -0.799594               | -1.607172 | -3.680042 |
| 39            | 1             | 0           | 0.891534                | -1.948453 | -3.289744 |
| 40            | 6             | 0           | -0.515850               | -2.728447 | -1.861649 |
| 41            | 1             | 0           | -0.731217               | -3.658590 | -2.402840 |
| 42            | 7             | 0           | -1.727279               | -2.268919 | -1.127495 |
| 43            | 1             | 0           | -1.948613               | -2.916353 | -0.375346 |
| 44            | 6             | 0           | 0.632970                | -3.042632 | -0.913105 |
| 45            | 8             | 0           | 1.711757                | -3.398352 | -1.341518 |

|                                                        |    |   |           |           |           |    |    |   |           |           |           |
|--------------------------------------------------------|----|---|-----------|-----------|-----------|----|----|---|-----------|-----------|-----------|
| 46                                                     | 8  | 0 | 0.341267  | -2.865337 | 0.363783  | 44 | 6  | 0 | 0.262368  | -2.989901 | -1.228194 |
| 47                                                     | 1  | 0 | -4.948020 | -2.392203 | 3.101497  | 45 | 8  | 0 | 1.345619  | -3.403239 | -1.586802 |
| 48                                                     | 1  | 0 | 1.172981  | -2.819954 | 0.900843  | 46 | 8  | 0 | -0.146740 | -2.924195 | 0.028201  |
| 49                                                     | 1  | 0 | -2.526555 | -2.243469 | -1.760332 | 47 | 1  | 0 | -4.479686 | -2.330037 | 3.321865  |
| 50                                                     | 1  | 0 | 3.915059  | -2.029749 | 3.551409  | 48 | 1  | 0 | 0.627493  | -3.004877 | 0.637195  |
| 51                                                     | 1  | 0 | -3.282666 | 0.037520  | -1.457055 | 49 | 1  | 0 | -2.681271 | -1.627742 | -2.231275 |
| 52                                                     | 17 | 0 | -4.271008 | -0.216232 | -2.309096 | 50 | 1  | 0 | 3.136167  | -2.543888 | 3.600935  |
| -----                                                  |    |   |           |           |           | 51 | 1  | 0 | -3.497481 | -0.082035 | -0.120066 |
| HF=-2731.5427253\ZeroPoint=0.3600072\Thermal=0.3929988 |    |   |           |           |           | 52 | 17 | 0 | -4.686451 | -0.196556 | -1.366752 |
| -----                                                  |    |   |           |           |           |    |    |   |           |           |           |

G = 13.6 kcal mol<sup>-1</sup>

| Center Number | Atomic Number | Atomic Type | Coordinates (Angstroms) |           |           |
|---------------|---------------|-------------|-------------------------|-----------|-----------|
|               |               |             | X                       | Y         | Z         |
| 1             | 46            | 0           | -1.511917               | -0.081877 | -0.553121 |
| 2             | 46            | 0           | 1.822656                | 0.493960  | -0.479612 |
| 3             | 7             | 0           | -1.145505               | 1.619967  | 0.507453  |
| 4             | 7             | 0           | -1.768394               | 1.810381  | 1.585091  |
| 5             | 6             | 0           | -2.598120               | 0.755504  | 1.969417  |
| 6             | 6             | 0           | -2.919945               | -0.297041 | 1.070062  |
| 7             | 6             | 0           | -3.587575               | -1.407535 | 1.597850  |
| 8             | 1             | 0           | -3.896084               | -2.204873 | 0.930467  |
| 9             | 6             | 0           | -3.952963               | -1.461879 | 2.942113  |
| 10            | 6             | 0           | -3.676176               | -0.388722 | 3.791995  |
| 11            | 1             | 0           | -3.983151               | -0.424980 | 4.830600  |
| 12            | 6             | 0           | -3.000322               | 0.726541  | 3.307270  |
| 13            | 1             | 0           | -2.744515               | 1.558814  | 3.951678  |
| 14            | 6             | 0           | -0.273568               | 2.668666  | 0.077796  |
| 15            | 6             | 0           | 1.015711                | 2.353659  | -0.383302 |
| 16            | 6             | 0           | 1.815332                | 3.439068  | -0.773507 |
| 17            | 1             | 0           | 2.832465                | 3.256567  | -1.096264 |
| 18            | 6             | 0           | 1.341678                | 4.748279  | -0.744184 |
| 19            | 1             | 0           | 1.984306                | 5.557023  | -1.075636 |
| 20            | 6             | 0           | 0.051624                | 5.026512  | -0.285181 |
| 21            | 1             | 0           | -0.319078               | 6.044551  | -0.263085 |
| 22            | 6             | 0           | -0.754750               | 3.985384  | 0.142499  |
| 23            | 1             | 0           | -1.759858               | 4.163836  | 0.503836  |
| 24            | 16            | 0           | 3.152460                | 1.070561  | 1.361335  |
| 25            | 6             | 0           | 4.495172                | -0.156394 | 1.077780  |
| 26            | 1             | 0           | 5.070338                | -0.260258 | 1.998196  |
| 27            | 1             | 0           | 5.175097                | 0.182631  | 0.289885  |
| 28            | 6             | 0           | 3.913861                | -1.507953 | 0.666733  |
| 29            | 1             | 0           | 4.731859                | -2.225456 | 0.492855  |
| 30            | 6             | 0           | 3.072854                | -2.137595 | 1.767220  |
| 31            | 8             | 0           | 3.712060                | -2.129404 | 2.940640  |
| 32            | 8             | 0           | 1.993876                | -2.675702 | 1.626028  |
| 33            | 7             | 0           | 3.100809                | -1.340229 | -0.558535 |
| 34            | 1             | 0           | 3.732279                | -1.128675 | -1.328142 |
| 35            | 1             | 0           | 2.632704                | -2.212117 | -0.808415 |
| 36            | 16            | 0           | 0.142986                | 0.233381  | -2.201200 |
| 37            | 6             | 0           | -0.074184               | -1.381665 | -3.097710 |
| 38            | 1             | 0           | -0.704458               | -1.156903 | -3.960586 |
| 39            | 1             | 0           | 0.889787                | -1.742443 | -3.452831 |
| 40            | 6             | 0           | -0.746741               | -2.455485 | -2.239604 |
| 41            | 1             | 0           | -1.031229               | -3.302874 | -2.876604 |
| 42            | 7             | 0           | -1.939204               | -1.877674 | -1.572757 |
| 43            | 1             | 0           | -2.345123               | -2.537122 | -0.913880 |

HF=-2731.5211187\ZeroPoint=0.3588198\Thermal=0.3908277

G = 8.0 kcal mol<sup>-1</sup>

| Center Number | Atomic Number | Atomic Type | Coordinates (Angstroms) |           |           |
|---------------|---------------|-------------|-------------------------|-----------|-----------|
|               |               |             | X                       | Y         | Z         |
| 1             | 46            | 0           | -1.547588               | -0.014946 | -0.233944 |
| 2             | 46            | 0           | 1.811514                | 0.375255  | -0.581970 |
| 3             | 7             | 0           | -1.030779               | 1.815349  | 0.560597  |
| 4             | 7             | 0           | -1.635339               | 2.134535  | 1.612951  |
| 5             | 6             | 0           | -2.605356               | 1.156414  | 1.995890  |
| 6             | 6             | 0           | -3.553603               | 0.650077  | 1.077605  |
| 7             | 6             | 0           | -4.424016               | -0.372271 | 1.485311  |
| 8             | 1             | 0           | -5.125331               | -0.757044 | 0.752988  |
| 9             | 6             | 0           | -4.365601               | -0.854822 | 2.787600  |
| 10            | 6             | 0           | -3.457118               | -0.307083 | 3.701600  |
| 11            | 1             | 0           | -3.428851               | -0.675373 | 4.720737  |
| 12            | 6             | 0           | -2.580898               | 0.701428  | 3.316713  |
| 13            | 1             | 0           | -1.859057               | 1.119119  | 4.007533  |
| 14            | 6             | 0           | -0.096125               | 2.747948  | 0.021384  |
| 15            | 6             | 0           | 1.113075                | 2.290807  | -0.536268 |
| 16            | 6             | 0           | 1.950955                | 3.282718  | -1.072002 |
| 17            | 1             | 0           | 2.911700                | 2.996719  | -1.479727 |
| 18            | 6             | 0           | 1.594027                | 4.628237  | -1.079587 |
| 19            | 1             | 0           | 2.264233                | 5.355775  | -1.524718 |
| 20            | 6             | 0           | 0.386788                | 5.047310  | -0.514399 |
| 21            | 1             | 0           | 0.106213                | 6.093771  | -0.521495 |
| 22            | 6             | 0           | -0.455833               | 4.106711  | 0.049358  |
| 23            | 1             | 0           | -1.405200               | 4.393349  | 0.484123  |
| 24            | 16            | 0           | 3.419904                | 1.033141  | 0.987794  |
| 25            | 6             | 0           | 4.677088                | -0.251214 | 0.588558  |
| 26            | 1             | 0           | 5.393202                | -0.301083 | 1.409073  |
| 27            | 1             | 0           | 5.223058                | 0.009216  | -0.323178 |
| 28            | 6             | 0           | 4.010332                | -1.610104 | 0.386315  |
| 29            | 1             | 0           | 4.772618                | -2.363367 | 0.132443  |
| 30            | 6             | 0           | 3.358190                | -2.127511 | 1.659826  |
| 31            | 8             | 0           | 4.200080                | -2.072247 | 2.696736  |
| 32            | 8             | 0           | 2.251772                | -2.615995 | 1.752598  |
| 33            | 7             | 0           | 3.004869                | -1.506098 | -0.695785 |
| 34            | 1             | 0           | 3.503218                | -1.391555 | -1.575941 |
| 35            | 1             | 0           | 2.473520                | -2.374369 | -0.785861 |
| 36            | 16            | 0           | -0.087528               | 0.019917  | -2.021276 |
| 37            | 6             | 0           | -0.513952               | -1.650359 | -2.730277 |
| 38            | 1             | 0           | -1.283031               | -1.451939 | -3.477744 |
| 39            | 1             | 0           | 0.367259                | -2.077462 | -3.206720 |
| 40            | 6             | 0           | -1.071325               | -2.592069 | -1.666009 |
| 41            | 1             | 0           | -1.488084               | -3.481051 | -2.157207 |

|    |    |   |           |           |           |    |   |   |           |           |           |
|----|----|---|-----------|-----------|-----------|----|---|---|-----------|-----------|-----------|
| 42 | 7  | 0 | -2.123816 | -1.884689 | -0.910663 | 40 | 6 | 0 | -2.762592 | -1.594036 | -2.388623 |
| 43 | 1  | 0 | -2.439955 | -2.444963 | -0.121531 | 41 | 1 | 0 | -3.199151 | -0.983452 | -3.184062 |
| 44 | 6  | 0 | 0.068256  | -3.069881 | -0.774227 | 42 | 7 | 0 | -3.131250 | -0.992007 | -1.083676 |
| 45 | 8  | 0 | 1.072417  | -3.568531 | -1.242044 | 43 | 1 | 0 | -2.953304 | -1.665820 | -0.334134 |
| 46 | 8  | 0 | -0.129552 | -2.850707 | 0.517890  | 44 | 6 | 0 | -3.341164 | -2.999519 | -2.505188 |
| 47 | 1  | 0 | -5.039660 | -1.642414 | 3.103363  | 45 | 8 | 0 | -3.911599 | -3.584945 | -1.619960 |
| 48 | 1  | 0 | 0.724517  | -2.940263 | 1.003765  | 46 | 8 | 0 | -3.132502 | -3.512791 | -3.733604 |
| 49 | 1  | 0 | -2.999748 | -1.652590 | -1.486790 | 47 | 1 | 0 | -5.296466 | 0.357179  | 3.552019  |
| 50 | 1  | 0 | 3.741965  | -2.419427 | 3.477196  | 48 | 1 | 0 | -3.501017 | -4.409415 | -3.752164 |
| 51 | 1  | 0 | -3.716723 | 1.111229  | 0.106127  | 49 | 1 | 0 | -4.127979 | -0.793156 | -1.059720 |
| 52 | 17 | 0 | -4.648591 | -0.837724 | -2.024950 | 50 | 1 | 0 | 6.711910  | -0.827099 | 1.605847  |

HF=-2731.5322235\ZeroPoint=0.3627373\Thermal=0.3950531

G = -11.7 kcal mol<sup>-1</sup>

| Center Number | Atomic Number | Atomic Type | Coordinates (Angstroms) |   |   |
|---------------|---------------|-------------|-------------------------|---|---|
|               |               |             | X                       | Y | Z |

|    |    |   |           |           |           |
|----|----|---|-----------|-----------|-----------|
| 1  | 46 | 0 | -1.991789 | 0.701990  | -0.547266 |
| 2  | 46 | 0 | 1.319511  | 0.321232  | -1.295808 |
| 3  | 7  | 0 | -0.962450 | 2.351287  | 0.131694  |
| 4  | 7  | 0 | -1.331608 | 2.874380  | 1.217773  |
| 5  | 6  | 0 | -2.387193 | 2.199389  | 1.828942  |
| 6  | 6  | 0 | -2.975567 | 1.095486  | 1.161318  |
| 7  | 6  | 0 | -4.029373 | 0.447690  | 1.808336  |
| 8  | 1  | 0 | -4.516814 | -0.407695 | 1.350056  |
| 9  | 6  | 0 | -4.473709 | 0.875869  | 3.070576  |
| 10 | 6  | 0 | -3.867227 | 1.959120  | 3.710962  |
| 11 | 1  | 0 | -4.212205 | 2.276705  | 4.687623  |
| 12 | 6  | 0 | -2.819327 | 2.630273  | 3.086650  |
| 13 | 1  | 0 | -2.322988 | 3.470416  | 3.557419  |
| 14 | 6  | 0 | 0.042159  | 3.052184  | -0.605150 |
| 15 | 6  | 0 | 1.009862  | 2.338858  | -1.332366 |
| 16 | 6  | 0 | 1.941750  | 3.105938  | -2.050014 |
| 17 | 1  | 0 | 2.707533  | 2.604670  | -2.633917 |
| 18 | 6  | 0 | 1.909729  | 4.498554  | -2.053673 |
| 19 | 1  | 0 | 2.637093  | 5.053244  | -2.637196 |
| 20 | 6  | 0 | 0.938805  | 5.179261  | -1.315093 |
| 21 | 1  | 0 | 0.905018  | 6.262524  | -1.315312 |
| 22 | 6  | 0 | 0.009051  | 4.457037  | -0.586087 |
| 23 | 1  | 0 | -0.756110 | 4.958327  | -0.007226 |
| 24 | 16 | 0 | 2.039959  | -2.002674 | -1.274240 |
| 25 | 6  | 0 | 3.778228  | -1.584931 | -0.817857 |
| 26 | 1  | 0 | 4.307617  | -1.223341 | -1.703266 |
| 27 | 1  | 0 | 4.291876  | -2.480513 | -0.461349 |
| 28 | 6  | 0 | 3.805940  | -0.504370 | 0.272626  |
| 29 | 1  | 0 | 3.312485  | -0.886216 | 1.166665  |
| 30 | 6  | 0 | 5.244116  | -0.157001 | 0.625447  |
| 31 | 8  | 0 | 5.788065  | -1.077396 | 1.451243  |
| 32 | 8  | 0 | 5.851906  | 0.790686  | 0.193818  |
| 33 | 7  | 0 | 3.075655  | 0.701626  | -0.161097 |
| 34 | 1  | 0 | 2.747193  | 1.203346  | 0.674749  |
| 35 | 1  | 0 | 3.706292  | 1.321536  | -0.668205 |
| 36 | 16 | 0 | -0.670420 | 0.170965  | -2.497153 |
| 37 | 6  | 0 | -1.238625 | -1.590568 | -2.551758 |
| 38 | 1  | 0 | -0.955041 | -2.030545 | -3.506312 |
| 39 | 1  | 0 | -0.771663 | -2.161568 | -1.748123 |

|    |    |   |           |           |          |
|----|----|---|-----------|-----------|----------|
| 51 | 1  | 0 | -2.407750 | -0.645133 | 3.008546 |
| 52 | 7  | 0 | 1.066496  | -1.520065 | 3.123613 |
| 53 | 6  | 0 | 0.284097  | -2.118729 | 2.009086 |
| 54 | 1  | 0 | 1.263055  | -0.416401 | 2.950007 |
| 55 | 1  | 0 | 1.974761  | -1.996618 | 3.163127 |
| 56 | 6  | 0 | 0.471016  | -3.642563 | 1.924919 |
| 57 | 1  | 0 | 0.664668  | -1.672607 | 1.079936 |
| 58 | 6  | 0 | -1.186330 | -1.765590 | 2.082437 |
| 59 | 16 | 0 | 2.236287  | -4.108260 | 1.736021 |
| 60 | 1  | 0 | -0.104747 | -4.011516 | 1.078110 |
| 61 | 1  | 0 | 0.102226  | -4.133613 | 2.828859 |
| 62 | 8  | 0 | -1.492438 | -0.974104 | 3.109864 |
| 63 | 8  | 0 | -1.978533 | -2.192188 | 1.275132 |
| 64 | 1  | 0 | 2.324587  | -3.470795 | 0.521078 |
| 65 | 1  | 0 | 0.597005  | -1.614883 | 4.023401 |
| 66 | 17 | 0 | 1.644972  | 1.264645  | 2.638112 |

HF=-3453.6679498\ZeroPoint=0.459872\Thermal=0.502472

G = 6.2 kcal mol<sup>-1</sup>

| Center Number | Atomic Number | Atomic Type | Coordinates (Angstroms) |   |   |
|---------------|---------------|-------------|-------------------------|---|---|
|               |               |             | X                       | Y | Z |

|    |    |   |           |           |           |
|----|----|---|-----------|-----------|-----------|
| 1  | 46 | 0 | -2.151684 | 0.235135  | -0.349200 |
| 2  | 46 | 0 | 1.081609  | 0.413382  | -1.251545 |
| 3  | 7  | 0 | -1.545158 | 2.152472  | 0.165313  |
| 4  | 7  | 0 | -2.212754 | 2.719115  | 1.080176  |
| 5  | 6  | 0 | -3.222263 | 1.946709  | 1.652219  |
| 6  | 6  | 0 | -3.278956 | 0.541659  | 1.449294  |
| 7  | 6  | 0 | -4.379878 | -0.146000 | 1.975344  |
| 8  | 1  | 0 | -4.432878 | -1.225787 | 1.872155  |
| 9  | 6  | 0 | -5.370654 | 0.520457  | 2.695293  |
| 10 | 6  | 0 | -5.272033 | 1.897688  | 2.912994  |
| 11 | 1  | 0 | -6.036608 | 2.410289  | 3.485084  |
| 12 | 6  | 0 | -4.196272 | 2.615822  | 2.399739  |
| 13 | 1  | 0 | -4.111916 | 3.686267  | 2.543011  |
| 14 | 6  | 0 | -0.599675 | 2.968919  | -0.522454 |
| 15 | 6  | 0 | 0.503318  | 2.386550  | -1.183944 |
| 16 | 6  | 0 | 1.355274  | 3.285559  | -1.855236 |
| 17 | 1  | 0 | 2.210576  | 2.900711  | -2.401519 |
| 18 | 6  | 0 | 1.134797  | 4.656738  | -1.878793 |
| 19 | 1  | 0 | 1.812039  | 5.303004  | -2.427131 |
| 20 | 6  | 0 | 0.032380  | 5.201845  | -1.209746 |
| 21 | 1  | 0 | -0.152985 | 6.269304  | -1.230587 |
| 22 | 6  | 0 | -0.829461 | 4.363225  | -0.533687 |
| 23 | 1  | 0 | -1.693423 | 4.759353  | -0.017857 |

|                                                        |        |        |                         |           |           |    |    |   |           |           |           |
|--------------------------------------------------------|--------|--------|-------------------------|-----------|-----------|----|----|---|-----------|-----------|-----------|
| 24                                                     | 16     | 0      | 2.013717                | -1.790627 | -1.361762 | 8  | 1  | 0 | -3.422033 | -1.273360 | 2.664237  |
| 25                                                     | 6      | 0      | 3.748734                | -1.189921 | -1.443563 | 9  | 6  | 0 | -4.999754 | 0.202052  | 2.450234  |
| 26                                                     | 1      | 0      | 3.946017                | -0.754127 | -2.426821 | 10 | 6  | 0 | -5.290937 | 1.543744  | 2.168198  |
| 27                                                     | 1      | 0      | 4.427702                | -2.031832 | -1.298597 | 11 | 1  | 0 | -6.314482 | 1.896659  | 2.224622  |
| 28                                                     | 6      | 0      | 3.982558                | -0.146001 | -0.347159 | 12 | 6  | 0 | -4.282383 | 2.430261  | 1.813139  |
| 29                                                     | 1      | 0      | 3.909938                | -0.626455 | 0.626375  | 13 | 1  | 0 | -4.494607 | 3.466850  | 1.582284  |
| 30                                                     | 6      | 0      | 5.368562                | 0.463246  | -0.472281 | 14 | 6  | 0 | -0.213601 | 3.222840  | -0.158196 |
| 31                                                     | 8      | 0      | 6.323106                | -0.385687 | -0.045734 | 15 | 6  | 0 | 0.832791  | 2.646779  | -0.899066 |
| 32                                                     | 8      | 0      | 5.604761                | 1.550831  | -0.941291 | 16 | 6  | 0 | 1.755958  | 3.545136  | -1.465665 |
| 33                                                     | 7      | 0      | 2.960367                | 0.931763  | -0.392835 | 17 | 1  | 0 | 2.577072  | 3.158028  | -2.060903 |
| 34                                                     | 1      | 0      | 2.839731                | 1.265136  | 0.572957  | 18 | 6  | 0 | 1.651040  | 4.921723  | -1.303064 |
| 35                                                     | 1      | 0      | 3.347704                | 1.719121  | -0.913196 | 19 | 1  | 0 | 2.379219  | 5.577318  | -1.768952 |
| 36                                                     | 16     | 0      | -0.937442               | 0.000325  | -2.339350 | 20 | 6  | 0 | 0.604890  | 5.462250  | -0.546262 |
| 37                                                     | 6      | 0      | -1.190900               | -1.830027 | -2.516187 | 21 | 1  | 0 | 0.516412  | 6.534233  | -0.415325 |
| 38                                                     | 1      | 0      | -0.993366               | -2.100891 | -3.551260 | 22 | 6  | 0 | -0.324690 | 4.616554  | 0.025332  |
| 39                                                     | 1      | 0      | -0.492167               | -2.361707 | -1.872002 | 23 | 1  | 0 | -1.147575 | 5.008887  | 0.607667  |
| 40                                                     | 6      | 0      | -2.629829               | -2.147848 | -2.124677 | 24 | 16 | 0 | 2.344350  | -1.484944 | -1.525382 |
| 41                                                     | 1      | 0      | -3.312251               | -1.598114 | -2.781481 | 25 | 6  | 0 | 4.018863  | -0.919605 | -0.996910 |
| 42                                                     | 7      | 0      | -2.853816               | -1.693603 | -0.733163 | 26 | 1  | 0 | 4.469722  | -0.303451 | -1.779815 |
| 43                                                     | 1      | 0      | -2.273602               | -2.244448 | -0.075537 | 27 | 1  | 0 | 4.663695  | -1.786911 | -0.840547 |
| 44                                                     | 6      | 0      | -2.982212               | -3.626923 | -2.254556 | 28 | 6  | 0 | 3.911529  | -0.103920 | 0.298702  |
| 45                                                     | 8      | 0      | -3.486478               | -4.283913 | -1.380622 | 29 | 1  | 0 | 3.501944  | -0.738514 | 1.086123  |
| 46                                                     | 8      | 0      | -2.689701               | -4.097217 | -3.481483 | 30 | 6  | 0 | 5.285617  | 0.386916  | 0.726485  |
| 47                                                     | 1      | 0      | -6.207183               | -0.032753 | 3.106992  | 31 | 8  | 0 | 6.012551  | -0.603144 | 1.284247  |
| 48                                                     | 1      | 0      | -2.940190               | -5.033528 | -3.513874 | 32 | 8  | 0 | 5.705182  | 1.504966  | 0.553234  |
| 49                                                     | 1      | 0      | -3.825434               | -1.832392 | -0.467864 | 33 | 7  | 0 | 2.995843  | 1.041510  | 0.112487  |
| 50                                                     | 1      | 0      | 7.181820                | 0.046488  | -0.169761 | 34 | 1  | 0 | 2.533899  | 1.259612  | 1.008214  |
| 51                                                     | 1      | 0      | -2.169796               | -0.147518 | 1.741968  | 35 | 1  | 0 | 3.526802  | 1.861964  | -0.177706 |
| 52                                                     | 7      | 0      | 1.182836                | -0.841305 | 3.549646  | 36 | 16 | 0 | -0.679637 | 0.385714  | -2.240874 |
| 53                                                     | 6      | 0      | 1.010138                | -1.591771 | 2.262558  | 37 | 6  | 0 | -1.020019 | -1.417004 | -2.518049 |
| 54                                                     | 1      | 0      | 1.994790                | -0.127582 | 3.420170  | 38 | 1  | 0 | -0.692229 | -1.663343 | -3.526153 |
| 55                                                     | 1      | 0      | 1.412895                | -1.459798 | 4.327438  | 39 | 1  | 0 | -0.473296 | -2.014676 | -1.790324 |
| 56                                                     | 6      | 0      | 1.676387                | -2.963502 | 2.250362  | 40 | 6  | 0 | -2.521127 | -1.602483 | -2.338820 |
| 57                                                     | 1      | 0      | 1.481864                | -0.974502 | 1.490174  | 41 | 1  | 0 | -3.050417 | -0.950299 | -3.043628 |
| 58                                                     | 6      | 0      | -0.478915               | -1.624815 | 1.886037  | 42 | 7  | 0 | -2.884434 | -1.195750 | -0.956899 |
| 59                                                     | 16     | 0      | 3.336260                | -2.996559 | 3.057605  | 43 | 1  | 0 | -2.493706 | -1.927094 | -0.306935 |
| 60                                                     | 1      | 0      | 1.751807                | -3.271037 | 1.208904  | 44 | 6  | 0 | -3.045585 | -3.012758 | -2.605711 |
| 61                                                     | 1      | 0      | 1.075478                | -3.699679 | 2.788304  | 45 | 8  | 0 | -4.005371 | -3.478534 | -2.049483 |
| 62                                                     | 8      | 0      | -1.167994               | -0.684438 | 2.440967  | 46 | 8  | 0 | -2.352949 | -3.642357 | -3.572895 |
| 63                                                     | 8      | 0      | -0.877321               | -2.461928 | 1.078817  | 47 | 1  | 0 | -5.798894 | -0.475432 | 2.727610  |
| 64                                                     | 1      | 0      | 3.765457                | -1.787992 | 2.624183  | 48 | 1  | 0 | -2.755328 | -4.514434 | -3.708099 |
| 65                                                     | 1      | 0      | 0.309673                | -0.332412 | 3.726535  | 49 | 1  | 0 | -3.896076 | -1.185999 | -0.845587 |
| 66                                                     | 17     | 0      | 3.361135                | 0.974759  | 2.802650  | 50 | 1  | 0 | 6.889168  | -0.246895 | 1.495601  |
| -----                                                  |        |        |                         |           |           |    |    |   |           |           |           |
| HF=-3453.6375377\ZeroPoint=0.4567582\Thermal=0.4988926 |        |        |                         |           |           |    |    |   |           |           |           |
| G = -6.3 kcal mol <sup>-1</sup>                        |        |        |                         |           |           |    |    |   |           |           |           |
| -----                                                  |        |        |                         |           |           |    |    |   |           |           |           |
| Center                                                 | Atomic | Atomic | Coordinates (Angstroms) |           |           | 56 | 6  | 0 | 1.224244  | -3.987962 | 1.362779  |
| Number                                                 | Number | Type   | X                       | Y         | Z         | 57 | 1  | 0 | 0.983869  | -1.904445 | 0.874590  |
| -----                                                  |        |        |                         |           |           |    |    |   |           |           |           |
| 1                                                      | 46     | 0      | -1.951611               | 0.561164  | -0.318916 | 58 | 6  | 0 | -0.931707 | -2.679657 | 1.516220  |
| 2                                                      | 46     | 0      | 1.327742                | 0.665777  | -1.138843 | 59 | 16 | 0 | 3.066155  | -3.987136 | 1.428470  |
| 3                                                      | 7      | 0      | -1.222975               | 2.387897  | 0.399441  | 60 | 1  | 0 | 0.895027  | -4.329640 | 0.383660  |
| 4                                                      | 7      | 0      | -1.961001               | 2.872890  | 1.291807  | 61 | 1  | 0 | 0.889155  | -4.712762 | 2.109224  |
| 5                                                      | 6      | 0      | -2.967299               | 1.962205  | 1.717436  | 62 | 8  | 0 | -1.569728 | -2.513185 | 2.573618  |
| 6                                                      | 6      | 0      | -2.649372               | 0.623684  | 2.052865  | 63 | 8  | 0 | -1.360278 | -2.900626 | 0.354827  |
| 7                                                      | 6      | 0      | -3.687657               | -0.252691 | 2.413138  | 64 | 1  | 0 | 3.184697  | -3.181580 | 0.346629  |
|                                                        |        |        |                         |           |           | 65 | 1  | 0 | 0.169736  | -2.331062 | 3.585672  |

66 17 0 0.981829 0.877013 2.574615  
 -----  
 HF=-3453.6606035\ZeroPoint=0.4606073\Thermal=0.5032452

G = -10.4 kcal mol<sup>-1</sup>

| Center Number | Atomic Number | Atomic Type | Coordinates (Angstroms) |           |           |
|---------------|---------------|-------------|-------------------------|-----------|-----------|
|               |               |             | X                       | Y         | Z         |
| 1             | 46            | 0           | 0.320426                | -0.058014 | 0.226641  |
| 2             | 46            | 0           | -2.321292               | 0.369151  | -0.908722 |
| 3             | 7             | 0           | -0.295641               | -1.992296 | -0.068108 |
| 4             | 7             | 0           | 0.052178                | -2.868533 | 0.776896  |
| 5             | 6             | 0           | 0.796725                | -2.346358 | 1.826390  |
| 6             | 6             | 0           | 1.035310                | -0.944603 | 1.874251  |
| 7             | 6             | 0           | 1.758443                | -0.454213 | 2.957241  |
| 8             | 1             | 0           | 1.998068                | 0.598740  | 3.035763  |
| 9             | 6             | 0           | 2.228794                | -1.321440 | 3.950989  |
| 10            | 6             | 0           | 1.987922                | -2.696137 | 3.886107  |
| 11            | 1             | 0           | 2.365860                | -3.352637 | 4.660712  |
| 12            | 6             | 0           | 1.265532                | -3.216497 | 2.820048  |
| 13            | 1             | 0           | 1.057977                | -4.277055 | 2.737455  |
| 14            | 6             | 0           | -1.105954               | -2.418050 | -1.166756 |
| 15            | 6             | 0           | -2.036723               | -1.505785 | -1.702573 |
| 16            | 6             | 0           | -2.827780               | -1.971392 | -2.763518 |
| 17            | 1             | 0           | -3.560399               | -1.307228 | -3.210960 |
| 18            | 6             | 0           | -2.688156               | -3.260541 | -3.276504 |
| 19            | 1             | 0           | -3.305416               | -3.580059 | -4.109831 |
| 20            | 6             | 0           | -1.746955               | -4.137594 | -2.729332 |
| 21            | 1             | 0           | -1.628531               | -5.136749 | -3.132693 |
| 22            | 6             | 0           | -0.957835               | -3.720804 | -1.668239 |
| 23            | 1             | 0           | -0.224435               | -4.381291 | -1.222911 |
| 24            | 16            | 0           | -2.650915               | 2.447663  | 0.249861  |
| 25            | 6             | 0           | -4.177940               | 1.965751  | 1.156041  |
| 26            | 1             | 0           | -5.062272               | 2.238401  | 0.569745  |
| 27            | 1             | 0           | -4.221752               | 2.503292  | 2.103557  |
| 28            | 6             | 0           | -4.205556               | 0.454663  | 1.431058  |
| 29            | 1             | 0           | -3.363938               | 0.199748  | 2.078104  |
| 30            | 6             | 0           | -5.505576               | 0.055567  | 2.114265  |
| 31            | 8             | 0           | -5.538012               | 0.468922  | 3.397041  |
| 32            | 8             | 0           | -6.413100               | -0.532547 | 1.578271  |
| 33            | 7             | 0           | -4.046047               | -0.284980 | 0.156420  |
| 34            | 1             | 0           | -3.982926               | -1.285638 | 0.328690  |
| 35            | 1             | 0           | -4.883618               | -0.156412 | -0.410721 |
| 36            | 16            | 0           | -0.307905               | 0.902918  | -1.993335 |
| 37            | 6             | 0           | 0.203935                | 2.639100  | -1.614990 |
| 38            | 1             | 0           | 0.611571                | 3.065716  | -2.530402 |
| 39            | 1             | 0           | -0.686658               | 3.201557  | -1.333775 |
| 40            | 6             | 0           | 1.273730                | 2.698550  | -0.515935 |
| 41            | 1             | 0           | 2.208328                | 2.293396  | -0.900481 |
| 42            | 7             | 0           | 0.902826                | 1.900181  | 0.674403  |
| 43            | 1             | 0           | 0.106569                | 2.336186  | 1.146334  |
| 44            | 6             | 0           | 1.530401                | 4.143837  | -0.107511 |
| 45            | 8             | 0           | 1.233762                | 4.624845  | 0.954499  |
| 46            | 8             | 0           | 2.119452                | 4.835153  | -1.107726 |
| 47            | 1             | 0           | 2.797292                | -0.914782 | 4.780710  |
| 48            | 1             | 0           | 2.248311                | 5.744716  | -0.798561 |
| 49            | 1             | 0           | 1.707123                | 1.914377  | 1.305343  |

|    |    |   |           |           |           |
|----|----|---|-----------|-----------|-----------|
| 50 | 1  | 0 | -6.399506 | 0.224668  | 3.768856  |
| 51 | 1  | 0 | 1.381011  | -0.568915 | -2.702145 |
| 52 | 8  | 0 | 2.183053  | -1.074388 | -2.431716 |
| 53 | 6  | 0 | 3.165567  | -0.214777 | -2.212024 |
| 54 | 6  | 0 | 4.304445  | -0.841028 | -1.404780 |
| 55 | 8  | 0 | 3.193138  | 0.937869  | -2.576999 |
| 56 | 6  | 0 | 3.788371  | -1.558152 | -0.147003 |
| 57 | 1  | 0 | 4.842216  | -1.544451 | -2.046732 |
| 58 | 7  | 0 | 5.231094  | 0.271563  | -1.040674 |
| 59 | 16 | 0 | 5.116180  | -2.049103 | 1.023168  |
| 60 | 1  | 0 | 3.255628  | -2.456151 | -0.452633 |
| 61 | 1  | 0 | 3.090869  | -0.920277 | 0.391589  |
| 62 | 1  | 0 | 5.353712  | 0.912729  | -1.825801 |
| 63 | 1  | 0 | 6.126060  | -0.099858 | -0.722122 |
| 64 | 1  | 0 | 4.807983  | 0.860734  | -0.191476 |
| 65 | 1  | 0 | 5.053455  | -0.906627 | 1.747168  |
| 66 | 17 | 0 | 4.127769  | 1.664527  | 1.270291  |

-----  
 HF=-3453.6657718\ZeroPoint=0.460406\Thermal=0.5034248

G = 10.6 kcal mol<sup>-1</sup>

| Center Number | Atomic Number | Atomic Type | Coordinates (Angstroms) |           |           |
|---------------|---------------|-------------|-------------------------|-----------|-----------|
|               |               |             | X                       | Y         | Z         |
| 1             | 46            | 0           | 0.500651                | 0.208290  | -0.018301 |
| 2             | 46            | 0           | -2.776422               | -0.438061 | 0.674504  |
| 3             | 7             | 0           | -0.539074               | 1.983632  | 0.129796  |
| 4             | 7             | 0           | -0.337265               | 2.866439  | -0.749294 |
| 5             | 6             | 0           | 0.605564                | 2.509491  | -1.719167 |
| 6             | 6             | 0           | 1.461581                | 1.396668  | -1.510801 |
| 7             | 6             | 0           | 2.313721                | 1.019890  | -2.555019 |
| 8             | 1             | 0           | 3.003018                | 0.192777  | -2.412813 |
| 9             | 6             | 0           | 2.323944                | 1.734366  | -3.754730 |
| 10            | 6             | 0           | 1.497372                | 2.847827  | -3.923883 |
| 11            | 1             | 0           | 1.523785                | 3.404666  | -4.853397 |
| 12            | 6             | 0           | 0.636708                | 3.246986  | -2.903510 |
| 13            | 1             | 0           | -0.024224               | 4.097565  | -3.019930 |
| 14            | 6             | 0           | -1.470744               | 2.329338  | 1.164552  |
| 15            | 6             | 0           | -2.441965               | 1.394258  | 1.562681  |
| 16            | 6             | 0           | -3.320642               | 1.821004  | 2.572458  |
| 17            | 1             | 0           | -4.092580               | 1.143829  | 2.925835  |
| 18            | 6             | 0           | -3.225168               | 3.081859  | 3.159920  |
| 19            | 1             | 0           | -3.910447               | 3.360467  | 3.953781  |
| 20            | 6             | 0           | -2.243307               | 3.981804  | 2.738719  |
| 21            | 1             | 0           | -2.158018               | 4.959782  | 3.197860  |
| 22            | 6             | 0           | -1.368626               | 3.609915  | 1.729495  |
| 23            | 1             | 0           | -0.595544               | 4.284530  | 1.382571  |
| 24            | 16            | 0           | -3.321593               | -2.486675 | -0.433406 |
| 25            | 6             | 0           | -5.043581               | -2.031990 | -0.891613 |
| 26            | 1             | 0           | -5.729739               | -2.255261 | -0.067249 |
| 27            | 1             | 0           | -5.351472               | -2.619734 | -1.757263 |
| 28            | 6             | 0           | -5.140646               | -0.537876 | -1.232582 |
| 29            | 1             | 0           | -4.503078               | -0.335162 | -2.094844 |
| 30            | 6             | 0           | -6.576080               | -0.153372 | -1.558786 |
| 31            | 8             | 0           | -6.944265               | -0.598179 | -2.777202 |
| 32            | 8             | 0           | -7.315363               | 0.445089  | -0.815364 |
| 33            | 7             | 0           | -4.642306               | 0.262151  | -0.088429 |

|    |    |   |           |           |           |    |    |   |           |           |           |
|----|----|---|-----------|-----------|-----------|----|----|---|-----------|-----------|-----------|
| 34 | 1  | 0 | -4.558652 | 1.243278  | -0.343703 | 18 | 6  | 0 | -2.776500 | -3.433506 | -2.851201 |
| 35 | 1  | 0 | -5.334529 | 0.235311  | 0.660374  | 19 | 1  | 0 | -3.395509 | -3.813887 | -3.657026 |
| 36 | 16 | 0 | -0.722836 | -1.025854 | 1.555685  | 20 | 6  | 0 | -1.768381 | -4.234086 | -2.309708 |
| 37 | 6  | 0 | -0.174875 | -2.701158 | 0.988308  | 21 | 1  | 0 | -1.594392 | -5.234037 | -2.688990 |
| 38 | 1  | 0 | -0.341854 | -3.403508 | 1.805118  | 22 | 6  | 0 | -0.977904 | -3.732267 | -1.288097 |
| 39 | 1  | 0 | -0.761974 | -3.015199 | 0.124485  | 23 | 1  | 0 | -0.177280 | -4.320592 | -0.857687 |
| 40 | 6  | 0 | 1.308593  | -2.612093 | 0.623069  | 24 | 16 | 0 | -3.408735 | 2.421450  | 0.169947  |
| 41 | 1  | 0 | 1.901997  | -2.304637 | 1.483547  | 25 | 6  | 0 | -5.165044 | 1.947366  | 0.439550  |
| 42 | 7  | 0 | 1.488769  | -1.586472 | -0.431352 | 26 | 1  | 0 | -5.738545 | 2.065961  | -0.486108 |
| 43 | 1  | 0 | 1.104566  | -1.953906 | -1.304237 | 27 | 1  | 0 | -5.599955 | 2.603882  | 1.194083  |
| 44 | 6  | 0 | 1.780119  | -3.967221 | 0.108224  | 28 | 6  | 0 | -5.269828 | 0.490436  | 0.912130  |
| 45 | 8  | 0 | 1.667644  | -4.330666 | -1.033011 | 29 | 1  | 0 | -4.749914 | 0.395241  | 1.866945  |
| 46 | 8  | 0 | 2.284987  | -4.730362 | 1.099323  | 30 | 6  | 0 | -6.726291 | 0.083293  | 1.082051  |
| 47 | 1  | 0 | 2.992097  | 1.432461  | -4.553471 | 31 | 8  | 0 | -7.267257 | 0.629304  | 2.189106  |
| 48 | 1  | 0 | 2.530531  | -5.586390 | 0.715038  | 32 | 8  | 0 | -7.340294 | -0.613032 | 0.310757  |
| 49 | 1  | 0 | 2.500888  | -1.467772 | -0.602408 | 33 | 7  | 0 | -4.601742 | -0.395332 | -0.071372 |
| 50 | 1  | 0 | -7.876949 | -0.368843 | -2.909984 | 34 | 1  | 0 | -4.523137 | -1.342913 | 0.290315  |
| 51 | 1  | 0 | 2.153467  | 1.417178  | -0.358338 | 35 | 1  | 0 | -5.191807 | -0.471882 | -0.900205 |
| 52 | 8  | 0 | 3.238596  | 1.735984  | 0.382823  | 36 | 16 | 0 | -0.585647 | 0.906490  | -1.395820 |
| 53 | 6  | 0 | 3.672024  | 0.804266  | 1.136920  | 37 | 6  | 0 | -0.161110 | 2.649314  | -0.940365 |
| 54 | 6  | 0 | 5.220851  | 0.754523  | 1.262933  | 38 | 1  | 0 | -0.391404 | 3.276226  | -1.801969 |
| 55 | 8  | 0 | 3.033173  | -0.057540 | 1.744560  | 39 | 1  | 0 | -0.761952 | 2.971965  | -0.089363 |
| 56 | 6  | 0 | 5.937498  | 1.282811  | 0.020187  | 40 | 6  | 0 | 1.330309  | 2.671883  | -0.601814 |
| 57 | 1  | 0 | 5.520544  | 1.319408  | 2.149515  | 41 | 1  | 0 | 1.920590  | 2.342863  | -1.457048 |
| 58 | 7  | 0 | 5.548618  | -0.686469 | 1.516217  | 42 | 7  | 0 | 1.584985  | 1.718425  | 0.506653  |
| 59 | 16 | 0 | 7.744863  | 0.903753  | -0.020372 | 43 | 1  | 0 | 1.254786  | 2.141066  | 1.377221  |
| 60 | 1  | 0 | 5.828163  | 2.364663  | -0.006350 | 44 | 6  | 0 | 1.726869  | 4.077702  | -0.172319 |
| 61 | 1  | 0 | 5.484059  | 0.871134  | -0.878095 | 45 | 8  | 0 | 1.703497  | 4.469879  | 0.965811  |
| 62 | 1  | 0 | 4.910866  | -1.034451 | 2.237167  | 46 | 8  | 0 | 2.054147  | 4.845741  | -1.229825 |
| 63 | 1  | 0 | 6.529246  | -0.814144 | 1.766390  | 47 | 1  | 0 | 2.946037  | -0.611709 | 4.900829  |
| 64 | 1  | 0 | 5.315859  | -1.228219 | 0.605672  | 48 | 1  | 0 | 2.253231  | 5.735872  | -0.900007 |
| 65 | 1  | 0 | 7.625485  | -0.235588 | -0.735033 | 49 | 1  | 0 | 2.609716  | 1.597429  | 0.630244  |
| 66 | 17 | 0 | 4.642916  | -1.755981 | -1.086937 | 50 | 1  | 0 | -8.203368 | 0.378311  | 2.220973  |

HF=-3453.6273033\ZeroPoint=0.4564381\Thermal=0.4990288

G = 4.9 kcal mol<sup>-1</sup>

| Center Number | Atomic Number | Atomic Type | Coordinates (Angstroms) |           |           |
|---------------|---------------|-------------|-------------------------|-----------|-----------|
|               |               |             | X                       | Y         | Z         |
| 1             | 46            | 0           | 0.626265                | -0.116045 | 0.274301  |
| 2             | 46            | 0           | -2.675643               | 0.307476  | -0.668256 |
| 3             | 7             | 0           | -0.345315               | -1.944750 | 0.219405  |
| 4             | 7             | 0           | -0.145682               | -2.732383 | 1.175293  |
| 5             | 6             | 0           | 0.752377                | -2.221113 | 2.150975  |
| 6             | 6             | 0           | 1.940227                | -1.546450 | 1.789566  |
| 7             | 6             | 0           | 2.722514                | -0.960489 | 2.793260  |
| 8             | 1             | 0           | 3.619209                | -0.416881 | 2.516521  |
| 9             | 6             | 0           | 2.341378                | -1.071274 | 4.128133  |
| 10            | 6             | 0           | 1.196295                | -1.793881 | 4.473495  |
| 11            | 1             | 0           | 0.915753                | -1.895097 | 5.515670  |
| 12            | 6             | 0           | 0.401241                | -2.379292 | 3.490938  |
| 13            | 1             | 0           | -0.501133               | -2.922320 | 3.743535  |
| 14            | 6             | 0           | -1.193461               | -2.423298 | -0.832616 |
| 15            | 6             | 0           | -2.189352               | -1.581848 | -1.356165 |
| 16            | 6             | 0           | -2.980570               | -2.139449 | -2.373688 |
| 17            | 1             | 0           | -3.766283               | -1.541719 | -2.826135 |

|    |    |   |          |           |           |
|----|----|---|----------|-----------|-----------|
| 51 | 1  | 0 | 2.325472 | -1.633992 | 0.767691  |
| 52 | 8  | 0 | 2.681114 | -1.617111 | -1.276555 |
| 53 | 6  | 0 | 3.305250 | -0.640381 | -1.729967 |
| 54 | 6  | 0 | 4.870557 | -0.744762 | -1.670956 |
| 55 | 8  | 0 | 2.877617 | 0.435354  | -2.213806 |
| 56 | 6  | 0 | 5.368389 | -1.498805 | -0.442415 |
| 57 | 1  | 0 | 5.220139 | -1.230223 | -2.585416 |
| 58 | 7  | 0 | 5.365417 | 0.671585  | -1.706662 |
| 59 | 16 | 0 | 7.180752 | -1.336824 | -0.127014 |
| 60 | 1  | 0 | 5.151057 | -2.556132 | -0.576178 |
| 61 | 1  | 0 | 4.850878 | -1.154154 | 0.448959  |
| 62 | 1  | 0 | 4.692922 | 1.161377  | -2.318489 |
| 63 | 1  | 0 | 6.334323 | 0.752715  | -2.008561 |
| 64 | 1  | 0 | 5.248870 | 1.098237  | -0.736048 |
| 65 | 1  | 0 | 7.072409 | -0.218914 | 0.625283  |
| 66 | 17 | 0 | 4.724279 | 1.567126  | 1.093366  |

HF=-3453.6387202\ZeroPoint=0.4602382\Thermal=0.5035014

G = -15.4 kcal mol<sup>-1</sup>

| Center Number | Atomic Number | Atomic Type | Coordinates (Angstroms) |          |           |
|---------------|---------------|-------------|-------------------------|----------|-----------|
|               |               |             | X                       | Y        | Z         |
| 1             | 46            | 0           | -1.846935               | 0.982912 | -0.148136 |

|    |    |   |           |           |           |
|----|----|---|-----------|-----------|-----------|
| 2  | 46 | 0 | 1.377052  | 0.713892  | -1.219178 |
| 3  | 7  | 0 | -0.689743 | 2.202326  | 1.050738  |
| 4  | 7  | 0 | -1.046562 | 2.325966  | 2.261427  |
| 5  | 6  | 0 | -2.130390 | 1.533158  | 2.615393  |
| 6  | 6  | 0 | -2.720727 | 0.694229  | 1.635838  |
| 7  | 6  | 0 | -3.721524 | -0.179068 | 2.047143  |
| 8  | 1  | 0 | -4.160567 | -0.886827 | 1.351862  |
| 9  | 6  | 0 | -4.144891 | -0.190344 | 3.383631  |
| 10 | 6  | 0 | -3.578433 | 0.669572  | 4.328315  |
| 11 | 1  | 0 | -3.923108 | 0.651602  | 5.355358  |
| 12 | 6  | 0 | -2.558846 | 1.534916  | 3.948963  |
| 13 | 1  | 0 | -2.084383 | 2.199709  | 4.661694  |
| 14 | 6  | 0 | 0.387097  | 3.038440  | 0.613864  |
| 15 | 6  | 0 | 1.293189  | 2.579230  | -0.363045 |
| 16 | 6  | 0 | 2.311003  | 3.477043  | -0.730687 |
| 17 | 1  | 0 | 3.029801  | 3.185341  | -1.490700 |
| 18 | 6  | 0 | 2.419867  | 4.751904  | -0.180824 |
| 19 | 1  | 0 | 3.208782  | 5.418117  | -0.513625 |
| 20 | 6  | 0 | 1.502703  | 5.177838  | 0.783025  |
| 21 | 1  | 0 | 1.570154  | 6.173003  | 1.206855  |
| 22 | 6  | 0 | 0.490268  | 4.321814  | 1.182052  |
| 23 | 1  | 0 | -0.239687 | 4.631754  | 1.918823  |
| 24 | 16 | 0 | 1.686577  | -1.497971 | -2.128721 |
| 25 | 6  | 0 | 3.503298  | -1.546623 | -1.846458 |
| 26 | 1  | 0 | 3.998878  | -0.972332 | -2.634266 |
| 27 | 1  | 0 | 3.851232  | -2.578560 | -1.908883 |
| 28 | 6  | 0 | 3.866674  | -0.967535 | -0.473838 |
| 29 | 1  | 0 | 3.447935  | -1.603367 | 0.303148  |
| 30 | 6  | 0 | 5.377151  | -0.921538 | -0.300205 |
| 31 | 8  | 0 | 5.886282  | -2.151946 | -0.092463 |
| 32 | 8  | 0 | 6.050229  | 0.077554  | -0.372682 |
| 33 | 7  | 0 | 3.294255  | 0.390881  | -0.303054 |
| 34 | 1  | 0 | 3.226317  | 0.598599  | 0.690730  |
| 35 | 1  | 0 | 3.945682  | 1.075585  | -0.687640 |
| 36 | 16 | 0 | -0.660145 | 1.232846  | -2.232125 |
| 37 | 6  | 0 | -1.426298 | -0.280641 | -2.987148 |
| 38 | 1  | 0 | -1.246275 | -0.274659 | -4.059949 |
| 39 | 1  | 0 | -0.985442 | -1.188477 | -2.576915 |
| 40 | 6  | 0 | -2.920386 | -0.244480 | -2.690048 |
| 41 | 1  | 0 | -3.342453 | 0.688659  | -3.079675 |
| 42 | 7  | 0 | -3.149975 | -0.255820 | -1.216392 |
| 43 | 1  | 0 | -3.033407 | -1.231239 | -0.866707 |
| 44 | 6  | 0 | -3.670286 | -1.380087 | -3.391123 |
| 45 | 8  | 0 | -3.266525 | -1.987662 | -4.344634 |
| 46 | 8  | 0 | -4.883535 | -1.573689 | -2.827605 |
| 47 | 1  | 0 | -4.921085 | -0.884364 | 3.688197  |
| 48 | 1  | 0 | -5.299403 | -2.334513 | -3.260576 |
| 49 | 1  | 0 | -4.117967 | -0.014262 | -1.017984 |
| 50 | 1  | 0 | 6.851127  | -2.073205 | -0.035639 |
| 51 | 1  | 0 | -0.621107 | -0.881687 | 0.518546  |
| 52 | 7  | 0 | -0.233436 | -1.840892 | 0.488103  |
| 53 | 6  | 0 | 0.311614  | -2.262799 | 1.809616  |
| 54 | 1  | 0 | -1.075605 | -2.461367 | 0.200079  |
| 55 | 1  | 0 | 0.490854  | -1.853372 | -0.271824 |
| 56 | 6  | 0 | 1.099468  | -3.557380 | 1.642981  |
| 57 | 1  | 0 | -0.539908 | -2.411807 | 2.475210  |
| 58 | 6  | 0 | 1.150656  | -1.102527 | 2.350928  |
| 59 | 16 | 0 | 1.714691  | -4.230070 | 3.234329  |

|    |    |   |           |           |           |
|----|----|---|-----------|-----------|-----------|
| 60 | 1  | 0 | 1.929024  | -3.420917 | 0.948791  |
| 61 | 1  | 0 | 0.435282  | -4.318193 | 1.229578  |
| 62 | 8  | 0 | 2.350249  | -0.999493 | 2.249585  |
| 63 | 8  | 0 | 0.360047  | -0.183818 | 2.909824  |
| 64 | 1  | 0 | 2.708736  | -3.332670 | 3.389988  |
| 65 | 17 | 0 | -2.733275 | -3.218113 | -0.245811 |
| 66 | 1  | 0 | 0.875940  | 0.601965  | 3.152854  |

HF=-3453.6752668\ZeroPoint=0.4608453\Thermal=0.5035233

G = 11.3 kcal mol<sup>-1</sup>

| Center Number | Atomic Number | Atomic Type | Coordinates (Angstroms) |           |           |
|---------------|---------------|-------------|-------------------------|-----------|-----------|
|               |               |             | X                       | Y         | Z         |
| 1             | 46            | 0           | -1.524211               | 0.452036  | 0.619961  |
| 2             | 46            | 0           | 0.974210                | 1.801311  | -0.140160 |
| 3             | 7             | 0           | -0.492554               | 0.323432  | 2.402288  |
| 4             | 7             | 0           | -0.755725               | -0.651583 | 3.164359  |
| 5             | 6             | 0           | -1.710752               | -1.531356 | 2.666545  |
| 6             | 6             | 0           | -2.064350               | -1.518236 | 1.286155  |
| 7             | 6             | 0           | -3.083156               | -2.381287 | 0.865920  |
| 8             | 1             | 0           | -3.341586               | -2.424064 | -0.188494 |
| 9             | 6             | 0           | -3.702500               | -3.243707 | 1.773356  |
| 10            | 6             | 0           | -3.313686               | -3.267689 | 3.114376  |
| 11            | 1             | 0           | -3.792942               | -3.949870 | 3.806933  |
| 12            | 6             | 0           | -2.309369               | -2.417011 | 3.565891  |
| 13            | 1             | 0           | -2.000891               | -2.406444 | 4.604310  |
| 14            | 6             | 0           | 0.499657                | 1.248664  | 2.848125  |
| 15            | 6             | 0           | 1.220972                | 1.987145  | 1.887350  |
| 16            | 6             | 0           | 2.216205                | 2.845210  | 2.383673  |
| 17            | 1             | 0           | 2.802050                | 3.438383  | 1.688451  |
| 18            | 6             | 0           | 2.460907                | 2.984958  | 3.746740  |
| 19            | 1             | 0           | 3.224654                | 3.674525  | 4.090624  |
| 20            | 6             | 0           | 1.711945                | 2.253316  | 4.675713  |
| 21            | 1             | 0           | 1.886922                | 2.373595  | 5.738392  |
| 22            | 6             | 0           | 0.735493                | 1.380841  | 4.229819  |
| 23            | 1             | 0           | 0.142196                | 0.805466  | 4.928386  |
| 24            | 16            | 0           | 0.776948                | 1.355495  | -2.477609 |
| 25            | 6             | 0           | 2.557454                | 1.009792  | -2.780100 |
| 26            | 1             | 0           | 3.093596                | 1.952988  | -2.919363 |
| 27            | 1             | 0           | 2.659242                | 0.420270  | -3.692122 |
| 28            | 6             | 0           | 3.158094                | 0.238397  | -1.601213 |
| 29            | 1             | 0           | 2.669365                | -0.728853 | -1.521402 |
| 30            | 6             | 0           | 4.646887                | 0.004687  | -1.804029 |
| 31            | 8             | 0           | 4.869313                | -0.982582 | -2.693925 |
| 32            | 8             | 0           | 5.523754                | 0.635500  | -1.266717 |
| 33            | 7             | 0           | 2.923129                | 0.956641  | -0.325415 |
| 34            | 1             | 0           | 3.072559                | 0.308693  | 0.445980  |
| 35            | 1             | 0           | 3.621291                | 1.693424  | -0.224201 |
| 36            | 16            | 0           | -1.158427               | 2.757438  | 0.227844  |
| 37            | 6             | 0           | -2.072505               | 2.925623  | -1.381813 |
| 38            | 1             | 0           | -2.583253               | 3.887881  | -1.355569 |
| 39            | 1             | 0           | -1.360006               | 2.936842  | -2.205284 |
| 40            | 6             | 0           | -3.075611               | 1.791672  | -1.542424 |
| 41            | 1             | 0           | -3.882717               | 1.886999  | -0.812486 |
| 42            | 7             | 0           | -2.398636               | 0.492146  | -1.274174 |
| 43            | 1             | 0           | -1.600915               | 0.393031  | -1.912740 |

|    |    |   |           |           |           |    |    |   |           |           |           |
|----|----|---|-----------|-----------|-----------|----|----|---|-----------|-----------|-----------|
| 44 | 6  | 0 | -3.715006 | 1.771688  | -2.935673 | 28 | 6  | 0 | -3.347300 | -0.957542 | 1.647650  |
| 45 | 8  | 0 | -3.408405 | 2.481353  | -3.855680 | 29 | 1  | 0 | -2.422947 | -0.737287 | 2.182471  |
| 46 | 8  | 0 | -4.672779 | 0.827659  | -2.978138 | 30 | 6  | 0 | -4.124572 | -2.014888 | 2.418460  |
| 47 | 1  | 0 | -4.479703 | -3.913541 | 1.423181  | 31 | 8  | 0 | -4.178890 | -1.727142 | 3.733820  |
| 48 | 1  | 0 | -4.977531 | 0.723485  | -3.892413 | 32 | 8  | 0 | -4.656540 | -2.977539 | 1.921365  |
| 49 | 1  | 0 | -2.982392 | -0.327156 | -1.511974 | 33 | 7  | 0 | -2.977480 | -1.472054 | 0.309638  |
| 50 | 1  | 0 | 5.826789  | -1.065590 | -2.823115 | 34 | 1  | 0 | -2.273230 | -2.199604 | 0.415882  |
| 51 | 1  | 0 | -1.106776 | -1.515445 | 0.360305  | 35 | 1  | 0 | -3.791547 | -1.910298 | -0.119769 |
| 52 | 7  | 0 | -0.203237 | -1.996047 | -0.739914 | 36 | 16 | 0 | -0.776129 | 1.598257  | -2.133799 |
| 53 | 6  | 0 | 0.713320  | -3.080508 | -0.362520 | 37 | 6  | 0 | -1.089480 | 3.287954  | -1.425823 |
| 54 | 1  | 0 | -0.927046 | -2.295253 | -1.434489 | 38 | 1  | 0 | -0.949191 | 4.007517  | -2.231455 |
| 55 | 1  | 0 | 0.290076  | -1.198434 | -1.150133 | 39 | 1  | 0 | -2.127118 | 3.331438  | -1.094771 |
| 56 | 6  | 0 | 1.557558  | -3.571096 | -1.541714 | 40 | 6  | 0 | -0.120113 | 3.594240  | -0.276798 |
| 57 | 1  | 0 | 0.112526  | -3.902449 | 0.029635  | 41 | 1  | 0 | 0.875042  | 3.792812  | -0.680494 |
| 58 | 6  | 0 | 1.569938  | -2.527288 | 0.774778  | 42 | 7  | 0 | -0.001650 | 2.446934  | 0.645148  |
| 59 | 16 | 0 | 2.706520  | -4.940956 | -1.109664 | 43 | 1  | 0 | -0.903360 | 2.284236  | 1.109966  |
| 60 | 1  | 0 | 2.124655  | -2.753561 | -1.986658 | 44 | 6  | 0 | -0.572169 | 4.839587  | 0.482357  |
| 61 | 1  | 0 | 0.886526  | -3.965717 | -2.305951 | 45 | 8  | 0 | -1.004456 | 4.847248  | 1.601830  |
| 62 | 8  | 0 | 2.566307  | -1.855440 | 0.619018  | 46 | 8  | 0 | -0.442342 | 5.941252  | -0.290919 |
| 63 | 8  | 0 | 1.052064  | -2.804788 | 1.977347  | 47 | 1  | 0 | 6.625556  | 1.043889  | 0.211886  |
| 64 | 1  | 0 | 3.605312  | -4.172503 | -0.461436 | 48 | 1  | 0 | -0.749932 | 6.702816  | 0.224168  |
| 65 | 17 | 0 | -2.671400 | -2.332197 | -2.583210 | 49 | 1  | 0 | 0.743650  | 2.651676  | 1.343093  |
| 66 | 1  | 0 | 1.569325  | -2.343604 | 2.657264  | 50 | 1  | 0 | -4.718884 | -2.405396 | 4.168075  |

HF=-3453.628271\ZeroPoint=0.4567867\Thermal=0.4995323

G = -12.4 kcal mol<sup>-1</sup>

| Center Number | Atomic Number | Atomic Type | Coordinates (Angstroms) |           |           |
|---------------|---------------|-------------|-------------------------|-----------|-----------|
|               |               |             | X                       | Y         | Z         |
| 1             | 46            | 0           | 0.561142                | 0.738931  | -0.397188 |
| 2             | 46            | 0           | -2.120495               | 0.029912  | -0.934469 |
| 3             | 7             | 0           | 1.149212                | -0.868969 | -1.607416 |
| 4             | 7             | 0           | 2.335756                | -1.180328 | -1.873385 |
| 5             | 6             | 0           | 3.436570                | -0.480175 | -1.365701 |
| 6             | 6             | 0           | 3.488353                | 0.891021  | -1.069460 |
| 7             | 6             | 0           | 4.635458                | 1.429690  | -0.501205 |
| 8             | 1             | 0           | 4.645788                | 2.474873  | -0.223303 |
| 9             | 6             | 0           | 5.741363                | 0.618217  | -0.247805 |
| 10            | 6             | 0           | 5.713576                | -0.736415 | -0.588447 |
| 11            | 1             | 0           | 6.577035                | -1.364122 | -0.402567 |
| 12            | 6             | 0           | 4.575634                | -1.282348 | -1.165185 |
| 13            | 1             | 0           | 4.524682                | -2.331087 | -1.431019 |
| 14            | 6             | 0           | 0.150514                | -1.727528 | -2.211203 |
| 15            | 6             | 0           | -1.220248               | -1.447787 | -2.040566 |
| 16            | 6             | 0           | -2.119082               | -2.337808 | -2.662753 |
| 17            | 1             | 0           | -3.185600               | -2.150558 | -2.584010 |
| 18            | 6             | 0           | -1.699216               | -3.443794 | -3.390124 |
| 19            | 1             | 0           | -2.429468               | -4.099661 | -3.852409 |
| 20            | 6             | 0           | -0.330967               | -3.705167 | -3.526657 |
| 21            | 1             | 0           | 0.012566                | -4.565938 | -4.088689 |
| 22            | 6             | 0           | 0.586562                | -2.850223 | -2.946497 |
| 23            | 1             | 0           | 1.646766                | -3.033704 | -3.046525 |
| 24            | 16            | 0           | -3.255914               | 1.572874  | 0.505170  |
| 25            | 6             | 0           | -4.170037               | 0.328105  | 1.504707  |
| 26            | 1             | 0           | -5.126014               | 0.096850  | 1.024003  |
| 27            | 1             | 0           | -4.376378               | 0.742510  | 2.491867  |

|    |    |   |           |           |           |    |    |   |           |           |          |
|----|----|---|-----------|-----------|-----------|----|----|---|-----------|-----------|----------|
| 51 | 1  | 0 | 2.643002  | 1.530779  | -1.288009 | 52 | 7  | 0 | 1.365296  | -0.022916 | 1.438324 |
| 52 | 7  | 0 | 1.365296  | -0.022916 | 1.438324  | 53 | 6  | 0 | 1.931559  | -1.377028 | 1.552263 |
| 53 | 6  | 0 | 1.931559  | -1.377028 | 1.552263  | 54 | 1  | 0 | 2.045889  | 0.718937  | 1.736993 |
| 54 | 1  | 0 | 2.045889  | 0.718937  | 1.736993  | 55 | 1  | 0 | 0.575460  | 0.049319  | 2.078951 |
| 55 | 1  | 0 | 0.575460  | 0.049319  | 2.078951  | 56 | 6  | 0 | 2.401247  | -1.642774 | 2.996671 |
| 56 | 6  | 0 | 2.401247  | -1.642774 | 2.996671  | 57 | 1  | 0 | 2.780557  | -1.462823 | 0.878746 |
| 57 | 1  | 0 | 2.780557  | -1.462823 | 0.878746  | 58 | 6  | 0 | 0.851733  | -2.368709 | 1.136566 |
| 58 | 6  | 0 | 0.851733  | -2.368709 | 1.136566  | 59 | 16 | 0 | 3.381931  | -3.177731 | 3.221497 |
| 59 | 16 | 0 | 3.381931  | -3.177731 | 3.221497  | 60 | 1  | 0 | 1.550279  | -1.635551 | 3.680883 |
| 60 | 1  | 0 | 1.550279  | -1.635551 | 3.680883  | 61 | 1  | 0 | 3.071765  | -0.831427 | 3.285939 |
| 61 | 1  | 0 | 3.071765  | -0.831427 | 3.285939  | 62 | 8  | 0 | -0.308430 | -2.273799 | 1.470523 |
| 62 | 8  | 0 | -0.308430 | -2.273799 | 1.470523  | 63 | 8  | 0 | 1.324513  | -3.354316 | 0.364796 |
| 63 | 8  | 0 | 1.324513  | -3.354316 | 0.364796  | 64 | 1  | 0 | 2.377997  | -4.049969 | 2.997322 |
| 64 | 1  | 0 | 2.377997  | -4.049969 | 2.997322  | 65 | 17 | 0 | 2.742404  | 2.608247  | 2.128127 |
| 65 | 17 | 0 | 2.742404  | 2.608247  | 2.128127  | 66 | 1  | 0 | 0.583715  | -3.915661 | 0.084801 |
| 66 | 1  | 0 | 0.583715  | -3.915661 | 0.084801  |    |    |   |           |           |          |

HF=-3453.6687956\ZeroPoint=0.4607809\Thermal=0.5039793

G = -3.7 kcal mol<sup>-1</sup>

| Center Number | Atomic Number | Atomic Type | Coordinates (Angstroms) |           |           |
|---------------|---------------|-------------|-------------------------|-----------|-----------|
|               |               |             | X                       | Y         | Z         |
| 1             | 46            | 0           | -1.221440               | -1.058696 | 0.340945  |
| 2             | 46            | 0           | 1.818110                | 0.343566  | -0.413013 |
| 3             | 7             | 0           | -0.446606               | -0.361942 | 2.111455  |
| 4             | 7             | 0           | -0.685608               | -1.024410 | 3.165229  |
| 5             | 6             | 0           | -1.462835               | -2.151266 | 2.944848  |
| 6             | 6             | 0           | -1.914207               | -2.429466 | 1.626549  |
| 7             | 6             | 0           | -2.733622               | -3.539311 | 1.453232  |
| 8             | 1             | 0           | -3.134489               | -3.788042 | 0.476436  |
| 9             | 6             | 0           | -3.071248               | -4.353077 | 2.541940  |
| 10            | 6             | 0           | -2.602006               | -4.073952 | 3.829280  |
| 11            | 1             | 0           | -2.872914               | -4.716676 | 4.658178  |



|    |    |   |                                                        |           |           |                                 |        |        |                         |           |           |
|----|----|---|--------------------------------------------------------|-----------|-----------|---------------------------------|--------|--------|-------------------------|-----------|-----------|
| 12 | 6  | 0 | -1.795342                                              | -2.963726 | 4.038823  | G = 13.0 kcal mol <sup>-1</sup> |        |        |                         |           |           |
| 13 | 1  | 0 | -1.422897                                              | -2.708506 | 5.024134  | -----                           |        |        |                         |           |           |
| 14 | 6  | 0 | 0.257651                                               | 0.875216  | 2.285575  | Center                          | Atomic | Atomic | Coordinates (Angstroms) |           |           |
| 15 | 6  | 0 | 1.177726                                               | 1.305890  | 1.310061  | Number                          | Number | Type   | X                       | Y         | Z         |
| 16 | 6  | 0 | 1.800782                                               | 2.544117  | 1.567775  | -----                           |        |        |                         |           |           |
| 17 | 1  | 0 | 2.528159                                               | 2.926754  | 0.857135  | 1                               | 46     | 0      | -1.096190               | -0.152208 | 0.001271  |
| 18 | 6  | 0 | 1.512876                                               | 3.317653  | 2.692074  | 2                               | 46     | 0      | 2.283485                | 0.080534  | -0.750409 |
| 19 | 1  | 0 | 2.010255                                               | 4.271181  | 2.836307  | 3                               | 7      | 0      | -0.228709               | 1.424879  | 1.026269  |
| 20 | 6  | 0 | 0.572984                                               | 2.869597  | 3.623348  | 4                               | 7      | 0      | -0.487950               | 1.560264  | 2.255512  |
| 21 | 1  | 0 | 0.333260                                               | 3.465087  | 4.496528  | 5                               | 6      | 0      | -1.385660               | 0.614769  | 2.753828  |
| 22 | 6  | 0 | -0.046433                                              | 1.643539  | 3.424824  | 6                               | 6      | 0      | -2.158309               | -0.169595 | 1.852532  |
| 23 | 1  | 0 | -0.762484                                              | 1.260942  | 4.142264  | 7                               | 6      | 0      | -2.970857               | -1.171647 | 2.394457  |
| 24 | 16 | 0 | 2.883062                                               | -0.492355 | -2.391233 | 8                               | 1      | 0      | -3.571518               | -1.801439 | 1.745623  |
| 25 | 6  | 0 | 4.599422                                               | -0.449833 | -1.730918 | 9                               | 6      | 0      | -3.028209               | -1.363398 | 3.777553  |
| 26 | 1  | 0 | 5.027354                                               | 0.552236  | -1.843106 | 10                              | 6      | 0      | -2.293655               | -0.551048 | 4.644399  |
| 27 | 1  | 0 | 5.216327                                               | -1.147098 | -2.298726 | 11                              | 1      | 0      | -2.357385               | -0.704530 | 5.715409  |
| 28 | 6  | 0 | 4.616356                                               | -0.842054 | -0.249839 | 12                              | 6      | 0      | -1.469293               | 0.451143  | 4.137266  |
| 29 | 1  | 0 | 4.233956                                               | -1.859432 | -0.151669 | 13                              | 1      | 0      | -0.870973               | 1.078421  | 4.787248  |
| 30 | 6  | 0 | 6.027706                                               | -0.767601 | 0.315236  | 14                              | 6      | 0      | 0.634127                | 2.416251  | 0.453207  |
| 31 | 8  | 0 | 6.786708                                               | -1.794525 | -0.111791 | 15                              | 6      | 0      | 1.666650                | 2.019848  | -0.412299 |
| 32 | 8  | 0 | 6.435403                                               | 0.116067  | 1.029791  | 16                              | 6      | 0      | 2.435834                | 3.060756  | -0.960681 |
| 33 | 7  | 0 | 3.718754                                               | 0.067134  | 0.504293  | 17                              | 1      | 0      | 3.242672                | 2.819650  | -1.646235 |
| 34 | 1  | 0 | 3.576442                                               | -0.278772 | 1.450348  | 18                              | 6      | 0      | 2.191292                | 4.402511  | -0.672105 |
| 35 | 1  | 0 | 4.181842                                               | 0.969527  | 0.614490  | 19                              | 1      | 0      | 2.794978                | 5.173790  | -1.138474 |
| 36 | 16 | 0 | -0.371977                                              | 0.653510  | -1.150585 | 20                              | 6      | 0      | 1.170411                | 4.756265  | 0.213428  |
| 37 | 6  | 0 | -0.966530                                              | -0.107402 | -2.731461 | 21                              | 1      | 0      | 0.977495                | 5.796711  | 0.446917  |
| 38 | 1  | 0 | -1.896134                                              | 0.414353  | -2.965897 | 22                              | 6      | 0      | 0.395784                | 3.759716  | 0.788383  |
| 39 | 1  | 0 | -0.235894                                              | 0.082956  | -3.514943 | 23                              | 1      | 0      | -0.400600               | 4.002886  | 1.481471  |
| 40 | 6  | 0 | -1.250126                                              | -1.610614 | -2.609198 | 24                              | 16     | 0      | 3.263204                | -2.080728 | -1.106712 |
| 41 | 1  | 0 | -1.845218                                              | -1.893111 | -3.487439 | 25                              | 6      | 0      | 4.939623                | -1.640614 | -0.493384 |
| 42 | 7  | 0 | -2.021946                                              | -1.917684 | -1.381069 | 26                              | 1      | 0      | 5.517448                | -1.144454 | -1.280432 |
| 43 | 1  | 0 | -2.030889                                              | -2.926939 | -1.252792 | 27                              | 1      | 0      | 5.466831                | -2.552033 | -0.209247 |
| 44 | 6  | 0 | 0.016418                                               | -2.455068 | -2.626038 | 28                              | 6      | 0      | 4.839663                | -0.709253 | 0.721417  |
| 45 | 8  | 0 | 0.332044                                               | -3.227497 | -1.756612 | 29                              | 1      | 0      | 4.302515                | -1.229132 | 1.516498  |
| 46 | 8  | 0 | 0.716678                                               | -2.230557 | -3.746248 | 30                              | 6      | 0      | 6.224057                | -0.313164 | 1.214124  |
| 47 | 1  | 0 | -3.710901                                              | -5.214639 | 2.381973  | 31                              | 8      | 0      | 6.827578                | -1.327897 | 1.863177  |
| 48 | 1  | 0 | 1.631412                                               | -2.528668 | -3.601992 | 32                              | 8      | 0      | 6.740770                | 0.760904  | 1.022944  |
| 49 | 1  | 0 | -3.003564                                              | -1.603759 | -1.540826 | 33                              | 7      | 0      | 4.065138                | 0.499123  | 0.349319  |
| 50 | 1  | 0 | 7.682729                                               | -1.673689 | 0.238867  | 34                              | 1      | 0      | 3.829075                | 1.041593  | 1.176868  |
| 51 | 1  | 0 | -1.461191                                              | 1.830127  | 0.365844  | 35                              | 1      | 0      | 4.658075                | 1.110970  | -0.212134 |
| 52 | 7  | 0 | -2.172735                                              | 2.458155  | 0.792953  | 36                              | 16     | 0      | 0.292780                | -0.147165 | -1.908425 |
| 53 | 6  | 0 | -2.710592                                              | 3.348348  | -0.296119 | 37                              | 6      | 0      | -0.037980               | -1.877580 | -2.507509 |
| 54 | 1  | 0 | -2.915123                                              | 1.844690  | 1.140097  | 38                              | 1      | 0      | -0.612736               | -1.758323 | -3.427863 |
| 55 | 1  | 0 | -1.741523                                              | 2.988388  | 1.556626  | 39                              | 1      | 0      | 0.908152                | -2.362419 | -2.740073 |
| 56 | 6  | 0 | -1.599137                                              | 4.204784  | -0.890536 | 40                              | 6      | 0      | -0.857745               | -2.688138 | -1.494179 |
| 57 | 1  | 0 | -3.477974                                              | 3.976198  | 0.163102  | 41                              | 1      | 0      | -1.312506               | -3.546611 | -2.002511 |
| 58 | 6  | 0 | -3.388810                                              | 2.439297  | -1.349201 | 42                              | 7      | 0      | -1.920039               | -1.827676 | -0.930208 |
| 59 | 16 | 0 | -0.788423                                              | 5.297998  | 0.352333  | 43                              | 1      | 0      | -2.567488               | -2.391419 | -0.347540 |
| 60 | 1  | 0 | -2.037920                                              | 4.843145  | -1.654820 | 44                              | 6      | 0      | 0.023233                | -3.245173 | -0.381718 |
| 61 | 1  | 0 | -0.850076                                              | 3.579426  | -1.375007 | 45                              | 8      | 0      | 0.009361                | -2.886108 | 0.766474  |
| 62 | 8  | 0 | -3.332673                                              | 2.694005  | -2.525614 | 46                              | 8      | 0      | 0.837721                | -4.186851 | -0.882480 |
| 63 | 8  | 0 | -3.989054                                              | 1.433623  | -0.753289 | 47                              | 1      | 0      | -3.659348               | -2.149127 | 4.177061  |
| 64 | 1  | 0 | 0.199202                                               | 4.443405  | 0.691930  | 48                              | 1      | 0      | 1.557073                | -4.337154 | -0.248497 |
| 65 | 1  | 0 | -4.336461                                              | 0.679260  | -1.408481 | 49                              | 1      | 0      | -2.520976               | -1.506653 | -1.694050 |
| 66 | 17 | 0 | -4.733928                                              | -0.796877 | -2.359597 | 50                              | 1      | 0      | 7.719221                | -1.038384 | 2.111210  |
|    |    |   | -----                                                  | -----     | -----     | 51                              | 1      | 0      | -2.841561               | 0.639850  | 0.980944  |
|    |    |   | HF=-3453.6518863\ZeroPoint=0.4595455\Thermal=0.5025672 |           |           | 52                              | 7      | 0      | -3.845183               | 1.593410  | 0.610779  |
|    |    |   |                                                        |           |           | 53                              | 6      | 0      | -4.242099               | 1.582632  | -0.819089 |

|    |    |   |           |           |           |
|----|----|---|-----------|-----------|-----------|
| 54 | 1  | 0 | -4.628254 | 1.306723  | 1.193412  |
| 55 | 1  | 0 | -3.552112 | 2.534728  | 0.876207  |
| 56 | 6  | 0 | -3.181084 | 2.231225  | -1.709517 |
| 57 | 1  | 0 | -5.192831 | 2.117470  | -0.935284 |
| 58 | 6  | 0 | -4.480791 | 0.117925  | -1.225958 |
| 59 | 16 | 0 | -2.802480 | 3.972747  | -1.217373 |
| 60 | 1  | 0 | -3.539747 | 2.231274  | -2.736509 |
| 61 | 1  | 0 | -2.256401 | 1.656185  | -1.685537 |
| 62 | 8  | 0 | -4.058299 | -0.340740 | -2.268084 |
| 63 | 8  | 0 | -5.137121 | -0.528695 | -0.290678 |
| 64 | 1  | 0 | -1.513793 | 3.770663  | -0.877326 |
| 65 | 1  | 0 | -5.049174 | -1.562612 | -0.357726 |
| 66 | 17 | 0 | -4.501800 | -3.328986 | -0.059200 |

HF=-3453.6265554\ZeroPoint=0.4558908\Thermal=0.4980881

G = 2.1 kcal mol<sup>-1</sup>

| Center Number | Atomic Number | Atomic Type | Coordinates (Angstroms) |           |           |
|---------------|---------------|-------------|-------------------------|-----------|-----------|
|               |               |             | X                       | Y         | Z         |
| 1             | 46            | 0           | -1.158939               | -0.416123 | 0.059365  |
| 2             | 46            | 0           | 2.130879                | 0.293389  | -0.689811 |
| 3             | 7             | 0           | -0.350742               | 0.897681  | 1.440119  |
| 4             | 7             | 0           | -0.513252               | 0.683715  | 2.666004  |
| 5             | 6             | 0           | -1.260677               | -0.469946 | 2.969321  |
| 6             | 6             | 0           | -2.279340               | -0.960258 | 2.121634  |
| 7             | 6             | 0           | -2.894649               | -2.178060 | 2.410608  |
| 8             | 1             | 0           | -3.668038               | -2.551402 | 1.746246  |
| 9             | 6             | 0           | -2.507326               | -2.891509 | 3.545447  |
| 10            | 6             | 0           | -1.535850               | -2.378347 | 4.405545  |
| 11            | 1             | 0           | -1.253403               | -2.931150 | 5.294078  |
| 12            | 6             | 0           | -0.915467               | -1.160947 | 4.129551  |
| 13            | 1             | 0           | -0.143467               | -0.759482 | 4.774277  |
| 14            | 6             | 0           | 0.365018                | 2.094231  | 1.102221  |
| 15            | 6             | 0           | 1.390986                | 2.032063  | 0.147556  |
| 16            | 6             | 0           | 2.034128                | 3.247296  | -0.138724 |
| 17            | 1             | 0           | 2.829715                | 3.268289  | -0.877271 |
| 18            | 6             | 0           | 1.672017                | 4.442885  | 0.480839  |
| 19            | 1             | 0           | 2.178068                | 5.364000  | 0.212677  |
| 20            | 6             | 0           | 0.654441                | 4.460318  | 1.437853  |
| 21            | 1             | 0           | 0.367806                | 5.387066  | 1.920901  |
| 22            | 6             | 0           | 0.000926                | 3.278745  | 1.757884  |
| 23            | 1             | 0           | -0.799018               | 3.258106  | 2.487465  |
| 24            | 16            | 0           | 3.205151                | -1.649996 | -1.590334 |
| 25            | 6             | 0           | 4.888479                | -1.255242 | -0.963490 |
| 26            | 1             | 0           | 5.394594                | -0.560353 | -1.641816 |
| 27            | 1             | 0           | 5.476410                | -2.172528 | -0.917440 |
| 28            | 6             | 0           | 4.810359                | -0.629252 | 0.434894  |
| 29            | 1             | 0           | 4.352060                | -1.349178 | 1.115087  |
| 30            | 6             | 0           | 6.198089                | -0.260699 | 0.940582  |
| 31            | 8             | 0           | 6.895768                | -1.352134 | 1.309387  |
| 32            | 8             | 0           | 6.638859                | 0.862124  | 0.978222  |
| 33            | 7             | 0           | 3.949269                | 0.577538  | 0.385269  |
| 34            | 1             | 0           | 3.739340                | 0.907562  | 1.324432  |
| 35            | 1             | 0           | 4.470768                | 1.336630  | -0.054383 |
| 36            | 16            | 0           | 0.106705                | 0.216750  | -1.780630 |
| 37            | 6             | 0           | -0.140091               | -1.291071 | -2.851439 |

|    |    |   |           |           |           |
|----|----|---|-----------|-----------|-----------|
| 38 | 1  | 0 | -0.736379 | -0.939540 | -3.694892 |
| 39 | 1  | 0 | 0.828736  | -1.633753 | -3.209201 |
| 40 | 6  | 0 | -0.902611 | -2.390258 | -2.101338 |
| 41 | 1  | 0 | -1.342292 | -3.083880 | -2.828053 |
| 42 | 7  | 0 | -1.964655 | -1.757775 | -1.296863 |
| 43 | 1  | 0 | -2.612071 | -2.440954 | -0.854232 |
| 44 | 6  | 0 | 0.027510  | -3.204892 | -1.207828 |
| 45 | 8  | 0 | 0.008448  | -3.209725 | -0.004426 |
| 46 | 8  | 0 | 0.886071  | -3.903747 | -1.965086 |
| 47 | 1  | 0 | -2.980367 | -3.840931 | 3.766011  |
| 48 | 1  | 0 | 1.610083  | -4.217391 | -1.400235 |
| 49 | 1  | 0 | -2.589396 | -1.213709 | -1.905388 |
| 50 | 1  | 0 | 7.783277  | -1.066855 | 1.576746  |
| 51 | 1  | 0 | -2.761823 | -0.282604 | 1.396131  |
| 52 | 7  | 0 | -3.447589 | 2.189521  | 0.777387  |
| 53 | 6  | 0 | -3.862166 | 2.189936  | -0.634323 |
| 54 | 1  | 0 | -4.185022 | 1.783001  | 1.344944  |
| 55 | 1  | 0 | -3.332452 | 3.152656  | 1.081237  |
| 56 | 6  | 0 | -2.800129 | 2.839277  | -1.524575 |
| 57 | 1  | 0 | -4.816565 | 2.719040  | -0.789938 |
| 58 | 6  | 0 | -4.102205 | 0.745737  | -1.088642 |
| 59 | 16 | 0 | -2.453750 | 4.603544  | -1.117861 |
| 60 | 1  | 0 | -3.137230 | 2.824484  | -2.559561 |
| 61 | 1  | 0 | -1.865825 | 2.283847  | -1.476736 |
| 62 | 8  | 0 | -3.742704 | 0.325261  | -2.174445 |
| 63 | 8  | 0 | -4.715078 | 0.028369  | -0.164462 |
| 64 | 1  | 0 | -1.474908 | 4.371755  | -0.220458 |
| 65 | 1  | 0 | -4.799383 | -0.961443 | -0.405587 |
| 66 | 17 | 0 | -4.676642 | -2.907429 | -0.485983 |

HF=-3453.6435725\ZeroPoint=0.4586604\Thermal=0.5020024

G = -0.6 kcal mol<sup>-1</sup>

| Center Number | Atomic Number | Atomic Type | Coordinates (Angstroms) |           |           |
|---------------|---------------|-------------|-------------------------|-----------|-----------|
|               |               |             | X                       | Y         | Z         |
| 1             | 46            | 0           | 1.440043                | -0.128091 | -0.208132 |
| 2             | 46            | 0           | -1.325018               | 0.399246  | -0.831498 |
| 3             | 7             | 0           | 0.920901                | -2.055192 | -0.622470 |
| 4             | 7             | 0           | 1.569570                | -2.983355 | -0.056021 |
| 5             | 6             | 0           | 2.526810                | -2.515977 | 0.833236  |
| 6             | 6             | 0           | 2.619900                | -1.116563 | 1.073768  |
| 7             | 6             | 0           | 3.536940                | -0.683700 | 2.025091  |
| 8             | 1             | 0           | 3.639970                | 0.371058  | 2.259889  |
| 9             | 6             | 0           | 4.338392                | -1.603577 | 2.712873  |
| 10            | 6             | 0           | 4.239716                | -2.973826 | 2.459117  |
| 11            | 1             | 0           | 4.865837                | -3.672894 | 3.000437  |
| 12            | 6             | 0           | 3.327685                | -3.437669 | 1.518639  |
| 13            | 1             | 0           | 3.218437                | -4.494869 | 1.307533  |
| 14            | 6             | 0           | -0.166722               | -2.410339 | -1.475469 |
| 15            | 6             | 0           | -1.204469               | -1.474861 | -1.674441 |
| 16            | 6             | 0           | -2.275032               | -1.898519 | -2.478800 |
| 17            | 1             | 0           | -3.100052               | -1.218434 | -2.667575 |
| 18            | 6             | 0           | -2.304383               | -3.158458 | -3.071406 |
| 19            | 1             | 0           | -3.141122               | -3.439216 | -3.702552 |
| 20            | 6             | 0           | -1.250975               | -4.055530 | -2.867281 |
| 21            | 1             | 0           | -1.263326               | -5.032830 | -3.335728 |

|    |    |   |           |           |           |    |    |   |           |           |           |
|----|----|---|-----------|-----------|-----------|----|----|---|-----------|-----------|-----------|
| 22 | 6  | 0 | -0.185497 | -3.686667 | -2.064427 | 20 | 6  | 0 | -0.787154 | -4.434894 | -2.541352 |
| 23 | 1  | 0 | 0.637883  | -4.365240 | -1.883208 | 21 | 1  | 0 | -0.680935 | -5.441948 | -2.927323 |
| 24 | 16 | 0 | -1.545552 | 2.514965  | 0.281584  | 22 | 6  | 0 | 0.232766  | -3.866817 | -1.801759 |
| 25 | 6  | 0 | -3.128440 | 2.139817  | 1.138651  | 23 | 1  | 0 | 1.139138  | -4.416753 | -1.585792 |
| 26 | 1  | 0 | -3.963135 | 2.344172  | 0.460991  | 24 | 16 | 0 | -1.943042 | 2.332284  | -0.096381 |
| 27 | 1  | 0 | -3.231050 | 2.786265  | 2.010854  | 25 | 6  | 0 | -3.348495 | 1.812833  | 0.971190  |
| 28 | 6  | 0 | -3.174438 | 0.673457  | 1.586958  | 26 | 1  | 0 | -4.253256 | 1.742795  | 0.360124  |
| 29 | 1  | 0 | -2.386189 | 0.507445  | 2.320329  | 27 | 1  | 0 | -3.512458 | 2.566218  | 1.742221  |
| 30 | 6  | 0 | -4.519752 | 0.353967  | 2.221596  | 28 | 6  | 0 | -3.054143 | 0.462857  | 1.631754  |
| 31 | 8  | 0 | -4.633902 | 0.906499  | 3.446048  | 29 | 1  | 0 | -2.190538 | 0.565925  | 2.289931  |
| 32 | 8  | 0 | -5.398301 | -0.283473 | 1.693372  | 30 | 6  | 0 | -4.248090 | -0.001798 | 2.450843  |
| 33 | 7  | 0 | -2.924720 | -0.233104 | 0.439308  | 31 | 8  | 0 | -4.400849 | 0.736475  | 3.567647  |
| 34 | 1  | 0 | -2.692269 | -1.162481 | 0.783862  | 32 | 8  | 0 | -4.997432 | -0.894850 | 2.135632  |
| 35 | 1  | 0 | -3.784236 | -0.337605 | -0.099547 | 33 | 7  | 0 | -2.707984 | -0.567474 | 0.618671  |
| 36 | 16 | 0 | 0.490161  | 0.956243  | -2.224091 | 34 | 1  | 0 | -2.165089 | -1.296092 | 1.085299  |
| 37 | 6  | 0 | 1.024859  | 2.684570  | -1.833507 | 35 | 1  | 0 | -3.559567 | -1.004505 | 0.267667  |
| 38 | 1  | 0 | 1.371540  | 3.134704  | -2.762585 | 36 | 16 | 0 | 0.417627  | 0.758778  | -2.280950 |
| 39 | 1  | 0 | 0.168920  | 3.257193  | -1.474977 | 37 | 6  | 0 | 0.702680  | 2.580178  | -2.079357 |
| 40 | 6  | 0 | 2.169188  | 2.703457  | -0.809876 | 38 | 1  | 0 | 1.091005  | 2.955072  | -3.024858 |
| 41 | 1  | 0 | 3.065125  | 2.287628  | -1.281228 | 39 | 1  | 0 | -0.250423 | 3.068815  | -1.878115 |
| 42 | 7  | 0 | 1.847194  | 1.853447  | 0.362524  | 40 | 6  | 0 | 1.716955  | 2.857455  | -0.963533 |
| 43 | 1  | 0 | 0.963030  | 2.173635  | 0.780340  | 41 | 1  | 0 | 2.707286  | 2.542948  | -1.307986 |
| 44 | 6  | 0 | 2.526358  | 4.113747  | -0.349752 | 42 | 7  | 0 | 1.394594  | 2.064916  | 0.247636  |
| 45 | 8  | 0 | 2.642683  | 4.446476  | 0.802251  | 43 | 1  | 0 | 0.428495  | 2.278227  | 0.549196  |
| 46 | 8  | 0 | 2.730349  | 4.938994  | -1.394731 | 44 | 6  | 0 | 1.833841  | 4.337052  | -0.604555 |
| 47 | 1  | 0 | 5.041507  | -1.245452 | 3.457439  | 45 | 8  | 0 | 1.878337  | 4.758311  | 0.522304  |
| 48 | 1  | 0 | 2.964802  | 5.812602  | -1.045239 | 46 | 8  | 0 | 1.926865  | 5.109302  | -1.703629 |
| 49 | 1  | 0 | 2.562085  | 1.972197  | 1.076114  | 47 | 1  | 0 | 5.270655  | -0.349523 | 3.310805  |
| 50 | 1  | 0 | -5.520534 | 0.705314  | 3.782933  | 48 | 1  | 0 | 2.019389  | 6.031087  | -1.416595 |
| 51 | 1  | 0 | 0.192710  | -0.888080 | 1.649935  | 49 | 1  | 0 | 2.009729  | 2.337304  | 1.011225  |
| 52 | 17 | 0 | -0.543112 | -1.504006 | 2.550374  | 50 | 1  | 0 | -5.186596 | 0.411848  | 4.033460  |
|    |    |   |           |           |           | 51 | 1  | 0 | 1.262106  | -0.739495 | 1.798475  |
|    |    |   |           |           |           | 52 | 17 | 0 | -0.114289 | -1.047215 | 2.749126  |

HF=-2731.5414917\ZeroPoint=0.360366\Thermal=0.3939839

G = 11.3 kcal mol<sup>-1</sup>

| Center Number | Atomic Number | Atomic Type | Coordinates (Angstroms) |           |           |
|---------------|---------------|-------------|-------------------------|-----------|-----------|
|               |               |             | X                       | Y         | Z         |
| 1             | 46            | 0           | 1.320514                | 0.017974  | -0.179465 |
| 2             | 46            | 0           | -1.412701               | 0.141071  | -0.913284 |
| 3             | 7             | 0           | 1.123291                | -1.988078 | -0.518663 |
| 4             | 7             | 0           | 1.956501                | -2.767078 | 0.029882  |
| 5             | 6             | 0           | 2.835511                | -2.120988 | 0.891820  |
| 6             | 6             | 0           | 2.514804                | -0.812100 | 1.360581  |
| 7             | 6             | 0           | 3.420348                | -0.189938 | 2.229045  |
| 8             | 1             | 0           | 3.185046                | 0.786864  | 2.638458  |
| 9             | 6             | 0           | 4.585956                | -0.839738 | 2.627912  |
| 10            | 6             | 0           | 4.865300                | -2.134875 | 2.176838  |
| 11            | 1             | 0           | 5.767309                | -2.637131 | 2.506196  |
| 12            | 6             | 0           | 3.986415                | -2.787068 | 1.318111  |
| 13            | 1             | 0           | 4.184322                | -3.790516 | 0.961156  |
| 14            | 6             | 0           | 0.090956                | -2.551828 | -1.318356 |
| 15            | 6             | 0           | -1.063938               | -1.778358 | -1.563923 |
| 16            | 6             | 0           | -2.084745               | -2.404953 | -2.297966 |
| 17            | 1             | 0           | -2.998157               | -1.858701 | -2.510999 |
| 18            | 6             | 0           | -1.955274               | -3.701886 | -2.785299 |
| 19            | 1             | 0           | -2.759648               | -4.143579 | -3.364225 |

HF=-2731.5233189\ZeroPoint=0.3590765\Thermal=0.3915962

G = -11.4 kcal mol<sup>-1</sup>

| Center Number | Atomic Number | Atomic Type | Coordinates (Angstroms) |           |           |
|---------------|---------------|-------------|-------------------------|-----------|-----------|
|               |               |             | X                       | Y         | Z         |
| 1             | 46            | 0           | 0.952979                | 0.185099  | 0.478227  |
| 2             | 46            | 0           | -1.424850               | -0.258575 | -1.046411 |
| 3             | 7             | 0           | 1.470026                | -1.773495 | 0.067125  |
| 4             | 7             | 0           | 2.632882                | -2.222952 | -0.026043 |
| 5             | 6             | 0           | 3.738387                | -1.426508 | 0.343058  |
| 6             | 6             | 0           | 3.834864                | -0.727860 | 1.552926  |
| 7             | 6             | 0           | 4.994640                | -0.008475 | 1.828146  |
| 8             | 1             | 0           | 5.076264                | 0.521588  | 2.770111  |
| 9             | 6             | 0           | 6.042843                | 0.028278  | 0.908941  |
| 10            | 6             | 0           | 5.948527                | -0.689043 | -0.285432 |
| 11            | 1             | 0           | 6.767113                | -0.676120 | -0.995638 |
| 12            | 6             | 0           | 4.811381                | -1.440110 | -0.557931 |
| 13            | 1             | 0           | 4.726185                | -2.021458 | -1.468052 |
| 14            | 6             | 0           | 0.436124                | -2.690057 | -0.344401 |
| 15            | 6             | 0           | -0.736166               | -2.198481 | -0.952951 |
| 16            | 6             | 0           | -1.616701               | -3.177880 | -1.450760 |
| 17            | 1             | 0           | -2.515635               | -2.865450 | -1.973669 |

|    |    |   |           |           |           |    |    |   |           |           |           |
|----|----|---|-----------|-----------|-----------|----|----|---|-----------|-----------|-----------|
| 18 | 6  | 0 | -1.384557 | -4.542699 | -1.305197 | 16 | 6  | 0 | 1.655225  | 2.596681  | -2.059366 |
| 19 | 1  | 0 | -2.100642 | -5.256776 | -1.698358 | 17 | 1  | 0 | 2.568087  | 2.169046  | -2.462942 |
| 20 | 6  | 0 | -0.240275 | -4.990792 | -0.640363 | 18 | 6  | 0 | 1.324204  | 3.903041  | -2.411931 |
| 21 | 1  | 0 | -0.066054 | -6.049988 | -0.492288 | 19 | 1  | 0 | 1.973492  | 4.463565  | -3.076177 |
| 22 | 6  | 0 | 0.674461  | -4.064327 | -0.171682 | 20 | 6  | 0 | 0.150595  | 4.483711  | -1.924929 |
| 23 | 1  | 0 | 1.575540  | -4.383187 | 0.335884  | 21 | 1  | 0 | -0.120593 | 5.495375  | -2.203311 |
| 24 | 16 | 0 | -2.461483 | 1.918637  | -0.892218 | 22 | 6  | 0 | -0.675479 | 3.749714  | -1.090544 |
| 25 | 6  | 0 | -3.942480 | 1.423835  | 0.081775  | 23 | 1  | 0 | -1.593230 | 4.173052  | -0.702844 |
| 26 | 1  | 0 | -4.778227 | 1.225308  | -0.597474 | 24 | 16 | 0 | 3.043517  | -1.981685 | -0.471509 |
| 27 | 1  | 0 | -4.230253 | 2.241461  | 0.742389  | 25 | 6  | 0 | 4.350376  | -1.154271 | 0.526127  |
| 28 | 6  | 0 | -3.658258 | 0.167803  | 0.915830  | 26 | 1  | 0 | 5.135629  | -0.780839 | -0.139768 |
| 29 | 1  | 0 | -2.883141 | 0.389311  | 1.652898  | 27 | 1  | 0 | 4.800302  | -1.877257 | 1.206276  |
| 30 | 6  | 0 | -4.916380 | -0.295413 | 1.637830  | 28 | 6  | 0 | 3.776381  | 0.015540  | 1.334620  |
| 31 | 8  | 0 | -5.243870 | 0.539672  | 2.642297  | 29 | 1  | 0 | 3.046626  | -0.373318 | 2.047510  |
| 32 | 8  | 0 | -5.560413 | -1.270826 | 1.338066  | 30 | 6  | 0 | 4.882111  | 0.741231  | 2.088958  |
| 33 | 7  | 0 | -3.151448 | -0.904395 | 0.029292  | 31 | 8  | 0 | 5.333453  | 0.010215  | 3.127708  |
| 34 | 1  | 0 | -2.905243 | -1.729028 | 0.572642  | 32 | 8  | 0 | 5.326243  | 1.821881  | 1.787756  |
| 35 | 1  | 0 | -3.897786 | -1.200652 | -0.598844 | 33 | 7  | 0 | 3.077919  | 0.947387  | 0.421669  |
| 36 | 16 | 0 | 0.702229  | 0.493597  | -1.855335 | 34 | 1  | 0 | 2.619913  | 1.688241  | 0.947133  |
| 37 | 6  | 0 | 0.671670  | 2.350854  | -1.866989 | 35 | 1  | 0 | 3.762208  | 1.419680  | -0.168859 |
| 38 | 1  | 0 | 1.365014  | 2.680021  | -2.639108 | 36 | 16 | 0 | -0.243208 | -0.835214 | -1.972774 |
| 39 | 1  | 0 | -0.329217 | 2.682201  | -2.140093 | 37 | 6  | 0 | -0.482964 | -2.672664 | -1.907333 |
| 40 | 6  | 0 | 1.102974  | 2.932147  | -0.510291 | 38 | 1  | 0 | -1.188100 | -2.893016 | -2.712505 |
| 41 | 1  | 0 | 2.185845  | 2.807998  | -0.411733 | 39 | 1  | 0 | 0.456800  | -3.177191 | -2.124112 |
| 42 | 7  | 0 | 0.465303  | 2.198492  | 0.604402  | 40 | 6  | 0 | -1.052439 | -3.191771 | -0.577715 |
| 43 | 1  | 0 | -0.561448 | 2.258357  | 0.506238  | 41 | 1  | 0 | -1.387818 | -4.226368 | -0.726267 |
| 44 | 6  | 0 | 0.822028  | 4.428204  | -0.393187 | 42 | 7  | 0 | -2.184297 | -2.342752 | -0.118442 |
| 45 | 8  | 0 | 0.303264  | 4.953692  | 0.555976  | 43 | 1  | 0 | -2.427763 | -2.599331 | 0.835710  |
| 46 | 8  | 0 | 1.266167  | 5.098034  | -1.477342 | 44 | 6  | 0 | 0.009173  | -3.216693 | 0.518820  |
| 47 | 1  | 0 | 6.938738  | 0.597357  | 1.129791  | 45 | 8  | 0 | -0.072174 | -2.575845 | 1.537666  |
| 48 | 1  | 0 | 1.078695  | 6.039935  | -1.343445 | 46 | 8  | 0 | 1.015908  | -4.017912 | 0.174661  |
| 49 | 1  | 0 | 0.715611  | 2.596220  | 1.508016  | 47 | 1  | 0 | -5.227718 | -0.457262 | 3.794466  |
| 50 | 1  | 0 | -6.062131 | 0.215527  | 3.049127  | 48 | 1  | 0 | 1.871012  | -3.576876 | 0.434676  |
| 51 | 1  | 0 | 3.031687  | -0.772267 | 2.275179  | 49 | 1  | 0 | -3.003768 | -2.483616 | -0.707517 |
| 52 | 17 | 0 | 0.658013  | -0.037718 | 2.822495  | 50 | 1  | 0 | 6.058026  | 0.499720  | 3.546710  |
|    |    |   |           |           |           | 51 | 1  | 0 | -3.512748 | -0.154249 | -1.260808 |
|    |    |   |           |           |           | 52 | 17 | 0 | -4.574800 | -0.563507 | -1.943832 |

HF=-2731.5607209\ZeroPoint=0.3634804\Thermal=0.3966906

G = 3.3 kcal mol<sup>-1</sup>

| Center Number | Atomic Number | Atomic Type | Coordinates (Angstroms) |           |           |
|---------------|---------------|-------------|-------------------------|-----------|-----------|
|               |               |             | X                       | Y         | Z         |
| 1             | 46            | 0           | -1.674540               | -0.291517 | -0.093295 |
| 2             | 46            | 0           | 1.613781                | -0.035992 | -0.786756 |
| 3             | 7             | 0           | -1.225710               | 1.701874  | 0.095707  |
| 4             | 7             | 0           | -1.824628               | 2.362043  | 0.991983  |
| 5             | 6             | 0           | -2.723720               | 1.607964  | 1.735010  |
| 6             | 6             | 0           | -2.873750               | 0.229487  | 1.437106  |
| 7             | 6             | 0           | -3.790095               | -0.491967 | 2.192814  |
| 8             | 1             | 0           | -3.964198               | -1.547004 | 2.003966  |
| 9             | 6             | 0           | -4.520178               | 0.127259  | 3.215917  |
| 10            | 6             | 0           | -4.351631               | 1.484128  | 3.499612  |
| 11            | 1             | 0           | -4.924059               | 1.949294  | 4.293088  |
| 12            | 6             | 0           | -3.449238               | 2.235063  | 2.755334  |
| 13            | 1             | 0           | -3.298039               | 3.291578  | 2.943247  |
| 14            | 6             | 0           | -0.333342               | 2.428629  | -0.751936 |
| 15            | 6             | 0           | 0.835957                | 1.812522  | -1.228965 |

HF=-2731.53297\ZeroPoint=0.3593072\Thermal=0.3928397

G = 18.0 kcal mol<sup>-1</sup>

| Center Number | Atomic Number | Atomic Type | Coordinates (Angstroms) |           |           |
|---------------|---------------|-------------|-------------------------|-----------|-----------|
|               |               |             | X                       | Y         | Z         |
| 1             | 46            | 0           | -1.743439               | -0.149634 | -0.372387 |
| 2             | 46            | 0           | 1.651208                | -0.062935 | -0.713573 |
| 3             | 7             | 0           | -1.111553               | 1.751557  | 0.040222  |
| 4             | 7             | 0           | -1.631480               | 2.360749  | 1.014007  |
| 5             | 6             | 0           | -2.560626               | 1.616770  | 1.740588  |
| 6             | 6             | 0           | -3.077991               | 0.389830  | 1.243800  |
| 7             | 6             | 0           | -3.846831               | -0.382156 | 2.120599  |
| 8             | 1             | 0           | -4.298185               | -1.299564 | 1.759740  |
| 9             | 6             | 0           | -4.123382               | 0.052771  | 3.415732  |
| 10            | 6             | 0           | -3.653056               | 1.290416  | 3.860548  |
| 11            | 1             | 0           | -3.891021               | 1.634706  | 4.860031  |
| 12            | 6             | 0           | -2.872515               | 2.079541  | 3.022405  |
| 13            | 1             | 0           | -2.469622               | 3.029587  | 3.351998  |

|                                                       |        |        |                         |           |           |    |    |   |           |           |           |
|-------------------------------------------------------|--------|--------|-------------------------|-----------|-----------|----|----|---|-----------|-----------|-----------|
| 14                                                    | 6      | 0      | -0.149654               | 2.488436  | -0.724741 | 5  | 6  | 0 | -2.675824 | 1.789951  | 1.698470  |
| 15                                                    | 6      | 0      | 1.031032                | 1.855133  | -1.147669 | 6  | 6  | 0 | -3.665509 | 1.177276  | 0.895546  |
| 16                                                    | 6      | 0      | 1.926800                | 2.652797  | -1.878536 | 7  | 6  | 0 | -4.646918 | 0.382081  | 1.506229  |
| 17                                                    | 1      | 0      | 2.854102                | 2.218743  | -2.240439 | 8  | 1  | 0 | -5.379064 | -0.093307 | 0.862623  |
| 18                                                    | 6      | 0      | 1.655905                | 3.985147  | -2.185980 | 9  | 6  | 0 | -4.653258 | 0.226248  | 2.887357  |
| 19                                                    | 1      | 0      | 2.365268                | 4.557333  | -2.774531 | 10 | 6  | 0 | -3.698548 | 0.881335  | 3.674889  |
| 20                                                    | 6      | 0      | 0.468401                | 4.579034  | -1.752577 | 11 | 1  | 0 | -3.718728 | 0.768140  | 4.752668  |
| 21                                                    | 1      | 0      | 0.245918                | 5.610606  | -1.998633 | 12 | 6  | 0 | -2.714950 | 1.670464  | 3.090385  |
| 22                                                    | 6      | 0      | -0.433951               | 3.832750  | -1.011705 | 13 | 1  | 0 | -1.959124 | 2.165979  | 3.686956  |
| 23                                                    | 1      | 0      | -1.365326               | 4.263701  | -0.666174 | 14 | 6  | 0 | -0.004408 | 2.615320  | -0.519886 |
| 24                                                    | 16     | 0      | 2.709434                | -2.178718 | -0.247095 | 15 | 6  | 0 | 1.114940  | 1.901163  | -0.986711 |
| 25                                                    | 6      | 0      | 4.210548                | -1.482578 | 0.555864  | 16 | 6  | 0 | 2.061026  | 2.661488  | -1.696441 |
| 26                                                    | 1      | 0      | 4.954802                | -1.215622 | -0.202004 | 17 | 1  | 0 | 2.940306  | 2.171965  | -2.104407 |
| 27                                                    | 1      | 0      | 4.649302                | -2.236171 | 1.210507  | 18 | 6  | 0 | 1.904358  | 4.025924  | -1.930641 |
| 28                                                    | 6      | 0      | 3.860271                | -0.235639 | 1.377582  | 19 | 1  | 0 | 2.651674  | 4.562626  | -2.505359 |
| 29                                                    | 1      | 0      | 3.157218                | -0.519511 | 2.162563  | 20 | 6  | 0 | 0.781489  | 4.699738  | -1.444013 |
| 30                                                    | 6      | 0      | 5.110793                | 0.363868  | 2.004942  | 21 | 1  | 0 | 0.646979  | 5.757933  | -1.633399 |
| 31                                                    | 8      | 0      | 5.544227                | -0.373645 | 3.046409  | 22 | 6  | 0 | -0.173395 | 3.994864  | -0.732126 |
| 32                                                    | 8      | 0      | 5.672084                | 1.355441  | 1.607302  | 23 | 1  | 0 | -1.064232 | 4.484320  | -0.358760 |
| 33                                                    | 7      | 0      | 3.200347                | 0.759334  | 0.500100  | 24 | 16 | 0 | 2.617768  | -2.251898 | -0.364003 |
| 34                                                    | 1      | 0      | 2.815993                | 1.524391  | 1.049426  | 25 | 6  | 0 | 4.248906  | -1.662987 | 0.248065  |
| 35                                                    | 1      | 0      | 3.902257                | 1.188572  | -0.103170 | 26 | 1  | 0 | 4.896138  | -1.391986 | -0.592695 |
| 36                                                    | 16     | 0      | -0.163422               | -0.655866 | -2.032663 | 27 | 1  | 0 | 4.732417  | -2.468029 | 0.802372  |
| 37                                                    | 6      | 0      | -0.492862               | -2.478355 | -2.192144 | 28 | 6  | 0 | 4.072218  | -0.445462 | 1.162537  |
| 38                                                    | 1      | 0      | -1.018680               | -2.584130 | -3.143226 | 29 | 1  | 0 | 3.464991  | -0.737076 | 2.021109  |
| 39                                                    | 1      | 0      | 0.455332                | -3.009295 | -2.254009 | 30 | 6  | 0 | 5.421366  | 0.071447  | 1.642447  |
| 40                                                    | 6      | 0      | -1.358091               | -3.049594 | -1.061966 | 31 | 8  | 0 | 5.953413  | -0.733998 | 2.581705  |
| 41                                                    | 1      | 0      | -1.777945               | -4.007196 | -1.396914 | 32 | 8  | 0 | 5.969093  | 1.058740  | 1.216283  |
| 42                                                    | 7      | 0      | -2.441825               | -2.103189 | -0.706348 | 33 | 7  | 0 | 3.352896  | 0.618330  | 0.421539  |
| 43                                                    | 1      | 0      | -2.909608               | -2.411426 | 0.143069  | 34 | 1  | 0 | 3.064398  | 1.362780  | 1.051993  |
| 44                                                    | 6      | 0      | -0.549274               | -3.344504 | 0.198899  | 35 | 1  | 0 | 4.000493  | 1.059650  | -0.231922 |
| 45                                                    | 8      | 0      | -0.777377               | -2.860485 | 1.277333  | 36 | 16 | 0 | -0.276578 | -0.594514 | -1.823137 |
| 46                                                    | 8      | 0      | 0.423025                | -4.221240 | -0.072739 | 37 | 6  | 0 | -0.717958 | -2.400447 | -1.955625 |
| 47                                                    | 1      | 0      | -4.729340               | -0.562098 | 4.071340  | 38 | 1  | 0 | -1.339238 | -2.456594 | -2.850400 |
| 48                                                    | 1      | 0      | 1.129464                | -4.125703 | 0.591540  | 39 | 1  | 0 | 0.195113  | -2.974861 | -2.103456 |
| 49                                                    | 1      | 0      | -3.158970               | -2.013811 | -1.428846 | 40 | 6  | 0 | -1.513649 | -2.904007 | -0.750226 |
| 50                                                    | 1      | 0      | 6.363942                | 0.025634  | 3.376541  | 41 | 1  | 0 | -2.019962 | -3.834807 | -1.037640 |
| 51                                                    | 1      | 0      | -3.677281               | 0.284085  | 0.064632  | 42 | 7  | 0 | -2.507976 | -1.893243 | -0.344184 |
| 52                                                    | 17     | 0      | -4.939316               | -0.063709 | -1.077606 | 43 | 1  | 0 | -2.919400 | -2.152255 | 0.551436  |
| -----                                                 |        |        |                         |           |           |    |    |   |           |           |           |
| HF=-2731.510252\ZeroPoint=0.3583723\Thermal=0.3911795 |        |        |                         |           |           |    |    |   |           |           |           |
| G = 13.9 kcal mol <sup>-1</sup>                       |        |        |                         |           |           |    |    |   |           |           |           |
| -----                                                 |        |        |                         |           |           |    |    |   |           |           |           |
| Center                                                | Atomic | Atomic | Coordinates (Angstroms) |           |           |    |    |   |           |           |           |
| Number                                                | Number | Type   | X                       | Y         | Z         |    |    |   |           |           |           |
| -----                                                 |        |        |                         |           |           |    |    |   |           |           |           |
| 1                                                     | 46     | 0      | -1.742666               | 0.011040  | -0.155029 | 44 | 6  | 0 | -0.618276 | -3.233546 | 0.439953  |
| 2                                                     | 46     | 0      | 1.645865                | -0.078816 | -0.655752 | 45 | 8  | 0 | -0.681161 | -2.687674 | 1.512173  |
| 3                                                     | 7      | 0      | -1.040974               | 1.928205  | 0.184035  | 46 | 8  | 0 | 0.231298  | -4.219549 | 0.124637  |
| 4                                                     | 7      | 0      | -1.601984               | 2.538144  | 1.128015  | 47 | 1  | 0 | -5.411395 | -0.387771 | 3.358975  |
|                                                       |        |        |                         |           |           | 48 | 1  | 0 | 0.958146  | -4.221633 | 0.769380  |
|                                                       |        |        |                         |           |           | 49 | 1  | 0 | -3.322824 | -1.744365 | -1.020783 |
|                                                       |        |        |                         |           |           | 50 | 1  | 0 | 6.827850  | -0.386715 | 2.816844  |
|                                                       |        |        |                         |           |           | 51 | 1  | 0 | -3.770251 | 1.402584  | -0.163635 |
|                                                       |        |        |                         |           |           | 52 | 17 | 0 | -4.870883 | -0.859505 | -1.786306 |
| -----                                                 |        |        |                         |           |           |    |    |   |           |           |           |
| HF=-2731.519573\ZeroPoint=0.3622664\Thermal=0.395348  |        |        |                         |           |           |    |    |   |           |           |           |

## Structures from Table S8

**Table S8.** B3LYP-D3/6-311+G\*\*/SDD(Pd)/gas phase relative stabilities for the main isomers of the bridged intermediates that could be formed by deuteration of the bridged dipalladated complex by D-transfer to the 5-ring. Free energies relative to **B1-1** (in kcal mol<sup>-1</sup>).

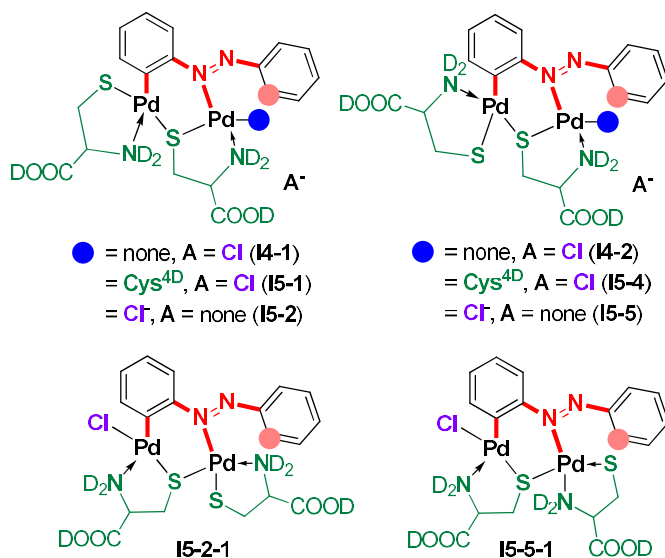

| Functional/donor groups in group <span style="color: blue;">●</span> |                                  |           |                 | $G_{rel}$ (kcal mol <sup>-1</sup> ) |              |               |              |
|----------------------------------------------------------------------|----------------------------------|-----------|-----------------|-------------------------------------|--------------|---------------|--------------|
| S/SD                                                                 | ND <sub>2</sub> /ND <sub>3</sub> | COO/COOD  | Cl <sup>-</sup> | Complex                             | <b>B1-1*</b> | Complex       | <b>B1-2*</b> |
| -                                                                    | -                                | -         | anion           | <b>I4-1</b>                         | 2.5          | <b>I4-2</b>   | -**          |
| S-coord                                                              | ND <sub>3</sub>                  | COOD      | anion           | <b>I5-1-1</b>                       | <b>-30.3</b> | <b>I5-4-1</b> | <b>-18.8</b> |
| SD-coord                                                             | ND <sub>2</sub>                  | COOD      | anion           | <b>I5-1-2</b>                       | -14.9        | <b>I5-4-2</b> | -5.4         |
| SD-coord                                                             | ND <sub>3</sub>                  | COO       | anion           | <b>I5-1-3</b>                       | -16.5        | <b>I5-4-3</b> | -12.7        |
| SD                                                                   | ND <sub>2</sub> -coord           | COOD      | anion           | <b>I5-1-4</b>                       | -18.6        | <b>I5-4-4</b> | -6.7         |
| SD                                                                   | ND <sub>3</sub>                  | COO-coord | anion           | <b>I5-1-5</b>                       | -14.2        | <b>I5-4-5</b> | -12.5        |
| -                                                                    | -                                | -         | coord           | <b>I5-2</b>                         | -4.8         | <b>I5-5</b>   | -11.7        |
| -                                                                    | -                                | -         | coord           | <b>I5-2-1</b>                       | -17.0        | <b>I5-5-1</b> | -5.4         |

\* Mother complex. \*\*Optimization ends in the coordinated Cl<sup>-</sup> unless Cl<sup>-</sup> is far from the empty coordination site.

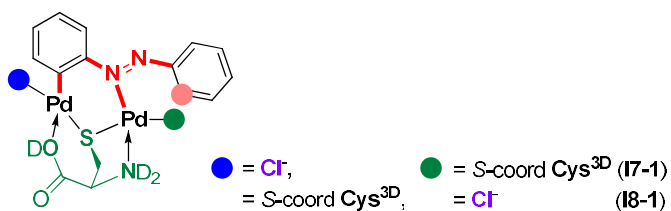

| Complex     | $G_{rel}$ (kcal mol <sup>-1</sup> ) |
|-------------|-------------------------------------|
| <b>I7-1</b> | -2.9                                |
| <b>I8-1</b> | 2.7                                 |

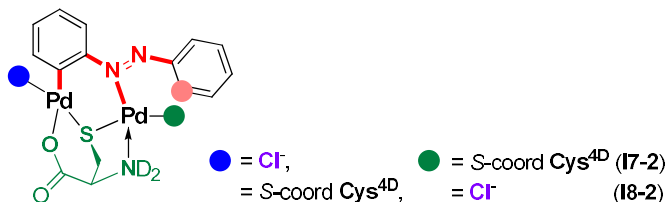

| Complex     | $G_{rel}$ (kcal mol <sup>-1</sup> ) |
|-------------|-------------------------------------|
| <b>I7-2</b> | -10.7                               |
| <b>I8-2</b> | -11.4                               |

G = 2.5 kcal mol<sup>-1</sup>

| Center Number | Atomic Number | Atomic Type | Coordinates (Angstroms) |           |           |
|---------------|---------------|-------------|-------------------------|-----------|-----------|
|               |               |             | X                       | Y         | Z         |
| 1             | 46            | 0           | -1.505831               | -0.198492 | -0.225629 |
| 2             | 46            | 0           | 1.379370                | 1.059647  | -0.562367 |
| 3             | 7             | 0           | -1.665920               | 1.821472  | 0.246309  |
| 4             | 7             | 0           | -2.594770               | 2.030997  | 1.068616  |
| 5             | 6             | 0           | -3.102491               | 0.798555  | 1.579617  |
| 6             | 6             | 0           | -2.216984               | -0.201804 | 2.053436  |
| 7             | 6             | 0           | -2.745896               | -1.420506 | 2.513521  |
| 8             | 1             | 0           | -2.050451               | -2.177317 | 2.857434  |
| 9             | 6             | 0           | -4.118159               | -1.626395 | 2.515446  |
| 10            | 6             | 0           | -4.984266               | -0.608404 | 2.089527  |
| 11            | 1             | 0           | -6.055995               | -0.769394 | 2.113766  |
| 12            | 6             | 0           | -4.487349               | 0.604275  | 1.630761  |
| 13            | 1             | 0           | -5.145666               | 1.392452  | 1.287064  |
| 14            | 6             | 0           | -1.026718               | 2.921666  | -0.374799 |
| 15            | 6             | 0           | 0.293624                | 2.746138  | -0.834487 |
| 16            | 6             | 0           | 0.892996                | 3.867602  | -1.432414 |
| 17            | 1             | 0           | 1.919932                | 3.799233  | -1.770783 |
| 18            | 6             | 0           | 0.207636                | 5.067212  | -1.589377 |
| 19            | 1             | 0           | 0.698110                | 5.905442  | -2.073149 |
| 20            | 6             | 0           | -1.108460               | 5.205941  | -1.126565 |
| 21            | 1             | 0           | -1.639687               | 6.141660  | -1.254489 |
| 22            | 6             | 0           | -1.725448               | 4.137500  | -0.506218 |
| 23            | 1             | 0           | -2.739629               | 4.212169  | -0.135105 |
| 24            | 16            | 0           | 2.456549                | 2.153134  | 1.186914  |
| 25            | 6             | 0           | 3.257164                | 0.654297  | 1.912314  |
| 26            | 1             | 0           | 2.538416                | 0.093477  | 2.514608  |
| 27            | 1             | 0           | 4.071844                | 0.984423  | 2.556069  |
| 28            | 6             | 0           | 3.787363                | -0.231071 | 0.792191  |
| 29            | 1             | 0           | 4.489832                | 0.360868  | 0.193462  |
| 30            | 6             | 0           | 4.561247                | -1.475859 | 1.224363  |
| 31            | 8             | 0           | 5.227649                | -1.303215 | 2.384355  |
| 32            | 8             | 0           | 4.621974                | -2.487612 | 0.570971  |
| 33            | 7             | 0           | 2.660697                | -0.624614 | -0.084096 |
| 34            | 1             | 0           | 3.026100                | -1.158077 | -0.869042 |
| 35            | 1             | 0           | 2.045956                | -1.266937 | 0.449647  |
| 36            | 16            | 0           | -0.112319               | -0.042462 | -2.077344 |
| 37            | 6             | 0           | 0.281018                | -1.852332 | -2.185453 |
| 38            | 1             | 0           | 0.666793                | -2.051059 | -3.183881 |
| 39            | 1             | 0           | 1.028344                | -2.123752 | -1.442021 |
| 40            | 6             | 0           | -1.002408               | -2.629365 | -1.919488 |
| 41            | 1             | 0           | -1.751473               | -2.347278 | -2.668267 |
| 42            | 7             | 0           | -1.509058               | -2.247224 | -0.582437 |
| 43            | 1             | 0           | -0.823178               | -2.542536 | 0.159690  |
| 44            | 6             | 0           | -0.874396               | -4.150379 | -2.005233 |
| 45            | 8             | 0           | -0.004839               | -4.536853 | -2.958032 |
| 46            | 8             | 0           | -1.519191               | -4.909420 | -1.330574 |
| 47            | 1             | 0           | -4.524668               | -2.566211 | 2.870064  |
| 48            | 1             | 0           | -2.391049               | -2.716288 | -0.386354 |
| 49            | 1             | 0           | 5.709428                | -2.124441 | 2.567662  |
| 50            | 1             | 0           | -1.163060               | 0.008541  | 2.214565  |
| 51            | 17            | 0           | 0.601071                | -2.396597 | 1.621978  |
| 52            | 1             | 0           | 0.009199                | -5.506702 | -2.975207 |

HF=-2731.5403748\ZeroPoint=0.3627599\Thermal=0.3958884

G = -30.3 kcal mol<sup>-1</sup>

| Center Number | Atomic Number | Atomic Type | Coordinates (Angstroms) |           |           |
|---------------|---------------|-------------|-------------------------|-----------|-----------|
|               |               |             | X                       | Y         | Z         |
| 1             | 46            | 0           | 1.017269                | 0.828893  | -0.088649 |
| 2             | 46            | 0           | -1.210290               | -0.262373 | -1.664873 |
| 3             | 7             | 0           | 2.150742                | -0.743499 | -0.805280 |
| 4             | 7             | 0           | 3.373113                | -0.886966 | -0.573964 |
| 5             | 6             | 0           | 4.090617                | 0.110505  | 0.104692  |
| 6             | 6             | 0           | 4.995622                | -0.324210 | 1.081051  |
| 7             | 6             | 0           | 5.748514                | 0.608119  | 1.782402  |
| 8             | 1             | 0           | 6.420057                | 0.276052  | 2.565180  |
| 9             | 6             | 0           | 5.648547                | 1.966782  | 1.474228  |
| 10            | 6             | 0           | 4.794063                | 2.389929  | 0.456858  |
| 11            | 1             | 0           | 4.745197                | 3.439618  | 0.190415  |
| 12            | 6             | 0           | 4.006037                | 1.470419  | -0.228590 |
| 13            | 1             | 0           | 3.369778                | 1.786628  | -1.045000 |
| 14            | 6             | 0           | 1.548918                | -1.767063 | -1.628283 |
| 15            | 6             | 0           | 0.218205                | -1.648179 | -2.096219 |
| 16            | 6             | 0           | -0.205699               | -2.641201 | -3.004686 |
| 17            | 1             | 0           | -1.208103               | -2.588995 | -3.406211 |
| 18            | 6             | 0           | 0.598792                | -3.707275 | -3.380381 |
| 19            | 1             | 0           | 0.216645                | -4.448609 | -4.073911 |
| 20            | 6             | 0           | 1.884501                | -3.837106 | -2.846833 |
| 21            | 1             | 0           | 2.510141                | -4.682977 | -3.105960 |
| 22            | 6             | 0           | 2.356357                | -2.868981 | -1.986589 |
| 23            | 1             | 0           | 3.353576                | -2.938068 | -1.577339 |
| 24            | 16            | 0           | -2.655476               | -2.003925 | -0.971166 |
| 25            | 6             | 0           | -4.233401               | -1.047252 | -0.947882 |
| 26            | 1             | 0           | -4.937077               | -1.551070 | -0.286294 |
| 27            | 1             | 0           | -4.657103               | -1.029582 | -1.955651 |
| 28            | 6             | 0           | -4.007700               | 0.381772  | -0.465308 |
| 29            | 1             | 0           | -4.956767               | 0.934733  | -0.500857 |
| 30            | 6             | 0           | -3.536060               | 0.421498  | 0.988183  |
| 31            | 8             | 0           | -2.542376               | 1.041661  | 1.338114  |
| 32            | 8             | 0           | -4.317354               | -0.265007 | 1.774805  |
| 33            | 7             | 0           | -2.989449               | 1.040739  | -1.324218 |
| 34            | 1             | 0           | -3.388897               | 1.171485  | -2.251741 |
| 35            | 1             | 0           | -2.815476               | 1.975642  | -0.955374 |
| 36            | 16            | 0           | 0.383201                | 1.469448  | -2.294850 |
| 37            | 6             | 0           | -0.422334               | 3.085656  | -1.884215 |
| 38            | 1             | 0           | 0.040771                | 3.841880  | -2.520014 |
| 39            | 1             | 0           | -1.470086               | 3.026113  | -2.168030 |
| 40            | 6             | 0           | -0.275316               | 3.525286  | -0.415581 |
| 41            | 1             | 0           | 0.650174                | 4.086152  | -0.292404 |
| 42            | 7             | 0           | -0.218771               | 2.384669  | 0.541054  |
| 43            | 1             | 0           | -1.142170               | 1.946845  | 0.688839  |
| 44            | 6             | 0           | -1.469465               | 4.400579  | -0.027333 |
| 45            | 8             | 0           | -1.104025               | 5.543314  | 0.572506  |
| 46            | 8             | 0           | -2.617680               | 4.073056  | -0.211889 |
| 47            | 1             | 0           | 6.249904                | 2.689903  | 2.012747  |
| 48            | 1             | 0           | 0.097897                | 2.703856  | 1.455867  |
| 49            | 1             | 0           | 5.063603                | -1.383059 | 1.299452  |
| 50            | 7             | 0           | -1.555572               | -2.503622 | 2.056204  |
| 51            | 6             | 0           | -0.201986               | -1.904909 | 1.840694  |

|    |    |   |           |           |          |    |    |   |           |           |           |
|----|----|---|-----------|-----------|----------|----|----|---|-----------|-----------|-----------|
| 52 | 6  | 0 | -0.011097 | -0.630692 | 2.677788 | 36 | 16 | 0 | 0.113088  | 0.784003  | -2.140086 |
| 53 | 1  | 0 | -0.150732 | -1.634189 | 0.782589 | 37 | 6  | 0 | -0.592639 | 2.483198  | -1.864630 |
| 54 | 6  | 0 | 0.838025  | -3.017239 | 2.067456 | 38 | 1  | 0 | -0.659052 | 2.973927  | -2.833847 |
| 55 | 16 | 0 | 1.497215  | 0.307966  | 2.180703 | 39 | 1  | 0 | -1.590003 | 2.419717  | -1.438410 |
| 56 | 1  | 0 | 0.089114  | -0.870793 | 3.738267 | 40 | 6  | 0 | 0.311144  | 3.268407  | -0.924036 |
| 57 | 1  | 0 | -0.892581 | -0.002947 | 2.571991 | 41 | 1  | 0 | 1.289951  | 3.400820  | -1.398839 |
| 58 | 8  | 0 | 0.498489  | -4.166169 | 2.228216 | 42 | 7  | 0 | 0.512382  | 2.497566  | 0.326015  |
| 59 | 8  | 0 | 2.112072  | -2.648751 | 2.032109 | 43 | 1  | 0 | -0.399642 | 2.377192  | 0.837094  |
| 60 | 1  | 0 | 2.182451  | -1.653244 | 2.004336 | 44 | 6  | 0 | -0.169768 | 4.680372  | -0.576439 |
| 61 | 1  | 0 | -1.906264 | 6.026066  | 0.830630 | 45 | 8  | 0 | -0.938254 | 5.217775  | -1.541572 |
| 62 | 1  | 0 | -2.120877 | -2.369618 | 1.188357 | 46 | 8  | 0 | 0.153014  | 5.253247  | 0.430503  |
| 63 | 1  | 0 | -2.074925 | -2.066917 | 2.882017 | 47 | 1  | 0 | 6.480434  | 2.763388  | 0.379541  |
| 64 | 1  | 0 | -1.433227 | -3.510270 | 2.223474 | 48 | 1  | 0 | 1.113892  | 3.031734  | 0.951653  |
| 65 | 1  | 0 | -3.920599 | -0.402551 | 2.716470 | 49 | 1  | 0 | -6.878052 | 1.137820  | 1.068565  |
| 66 | 17 | 0 | -3.081107 | -1.098268 | 4.265827 | 50 | 1  | 0 | 5.215465  | -1.274639 | 1.157372  |

HF=-3453.7050788\ZeroPoint=0.4635458\Thermal=0.5046889

G = -14.9 kcal mol<sup>-1</sup>

| Center Number | Atomic Number | Atomic Type | Coordinates (Angstroms) |           |           |
|---------------|---------------|-------------|-------------------------|-----------|-----------|
|               |               |             | X                       | Y         | Z         |
| 1             | 46            | 0           | 1.220120                | 0.581136  | -0.082203 |
| 2             | 46            | 0           | -1.370690               | -0.826825 | -1.111962 |
| 3             | 7             | 0           | 2.089733                | -1.235090 | -0.666030 |
| 4             | 7             | 0           | 3.339026                | -1.353323 | -0.638892 |
| 5             | 6             | 0           | 4.136683                | -0.222559 | -0.371629 |
| 6             | 6             | 0           | 5.124786                | -0.343108 | 0.611191  |
| 7             | 6             | 0           | 5.947255                | 0.742214  | 0.895245  |
| 8             | 1             | 0           | 6.689233                | 0.660400  | 1.680680  |
| 9             | 6             | 0           | 5.827666                | 1.925486  | 0.165091  |
| 10            | 6             | 0           | 4.885105                | 2.018389  | -0.859223 |
| 11            | 1             | 0           | 4.818126                | 2.921676  | -1.455007 |
| 12            | 6             | 0           | 4.032700                | 0.952703  | -1.131423 |
| 13            | 1             | 0           | 3.323756                | 1.003589  | -1.947696 |
| 14            | 6             | 0           | 1.363993                | -2.392484 | -1.102182 |
| 15            | 6             | 0           | -0.013824               | -2.316123 | -1.406650 |
| 16            | 6             | 0           | -0.570751               | -3.473582 | -1.995330 |
| 17            | 1             | 0           | -1.615601               | -3.466764 | -2.277505 |
| 18            | 6             | 0           | 0.152482                | -4.638938 | -2.194126 |
| 19            | 1             | 0           | -0.333602               | -5.503526 | -2.633465 |
| 20            | 6             | 0           | 1.494809                | -4.708998 | -1.801887 |
| 21            | 1             | 0           | 2.057894                | -5.627968 | -1.912947 |
| 22            | 6             | 0           | 2.096599                | -3.590542 | -1.272739 |
| 23            | 1             | 0           | 3.136090                | -3.614381 | -0.980058 |
| 24            | 16            | 0           | -2.698715               | -2.356862 | 0.101789  |
| 25            | 6             | 0           | -3.910260               | -1.141966 | 0.778191  |
| 26            | 1             | 0           | -3.485804               | -0.601057 | 1.624130  |
| 27            | 1             | 0           | -4.793783               | -1.687168 | 1.107223  |
| 28            | 6             | 0           | -4.266747               | -0.154197 | -0.325440 |
| 29            | 1             | 0           | -4.676742               | -0.714619 | -1.173655 |
| 30            | 6             | 0           | -5.323633               | 0.890081  | 0.034496  |
| 31            | 8             | 0           | -6.235717               | 0.428330  | 0.912442  |
| 32            | 8             | 0           | -5.370592               | 1.989402  | -0.457915 |
| 33            | 7             | 0           | -3.032967               | 0.528188  | -0.777142 |
| 34            | 1             | 0           | -3.267226               | 1.139490  | -1.555161 |
| 35            | 1             | 0           | -2.721052               | 1.131237  | 0.006187  |

|    |    |   |           |           |           |    |    |   |           |           |           |
|----|----|---|-----------|-----------|-----------|----|----|---|-----------|-----------|-----------|
| 51 | 7  | 0 | -1.421061 | -1.173235 | 3.521452  | 56 | 16 | 0 | 2.101131  | 0.463963  | 2.175960  |
| 52 | 6  | 0 | -0.282941 | -1.031609 | 2.607312  | 57 | 1  | 0 | 1.042529  | -0.322171 | 4.173322  |
| 53 | 6  | 0 | 0.643593  | 0.017190  | 3.218042  | 58 | 1  | 0 | 0.088406  | 0.945717  | 3.350952  |
| 54 | 1  | 0 | -0.593530 | -0.685131 | 1.609583  | 59 | 8  | 0 | 1.578563  | -2.576628 | 2.720500  |
| 55 | 6  | 0 | 0.421318  | -2.380945 | 2.411797  | 60 | 8  | 0 | -0.310136 | -3.346771 | 1.865200  |
| 56 | 16 | 0 | 2.101131  | 0.463963  | 2.175960  | 61 | 1  | 0 | 2.645700  | -0.772360 | 2.198043  |
| 57 | 1  | 0 | 1.042529  | -0.322171 | 4.173322  | 62 | 17 | 0 | -2.067553 | 1.913020  | 1.890292  |
| 58 | 1  | 0 | 0.088406  | 0.945717  | 3.350952  | 63 | 1  | 0 | -1.145506 | -3.002081 | 1.449505  |
| 59 | 8  | 0 | 1.578563  | -2.576628 | 2.720500  | 64 | 1  | 0 | -1.190884 | 6.111633  | -1.260961 |
| 60 | 8  | 0 | -0.310136 | -3.346771 | 1.865200  | 65 | 1  | 0 | -1.990653 | -0.332495 | 3.444634  |
| 61 | 1  | 0 | 2.645700  | -0.772360 | 2.198043  | 66 | 1  | 0 | -2.004052 | -1.960812 | 3.258205  |
| 62 | 17 | 0 | -2.067553 | 1.913020  | 1.890292  |    |    |   |           |           |           |
| 63 | 1  | 0 | -1.145506 | -3.002081 | 1.449505  |    |    |   |           |           |           |
| 64 | 1  | 0 | -1.190884 | 6.111633  | -1.260961 |    |    |   |           |           |           |
| 65 | 1  | 0 | -1.990653 | -0.332495 | 3.444634  |    |    |   |           |           |           |
| 66 | 1  | 0 | -2.004052 | -1.960812 | 3.258205  |    |    |   |           |           |           |

HF=-3453.6757545\ZeroPoint=0.4607747\Thermal=0.503268

G = -16.5 kcal mol<sup>-1</sup>

| Center Number | Atomic Number | Atomic Type | Coordinates (Angstroms) |           |           |
|---------------|---------------|-------------|-------------------------|-----------|-----------|
|               |               |             | X                       | Y         | Z         |
| 1             | 46            | 0           | 0.069216                | -0.889400 | 0.428686  |
| 2             | 46            | 0           | 2.188789                | 1.021117  | 0.340748  |
| 3             | 7             | 0           | 1.417316                | -2.227951 | -0.458801 |
| 4             | 7             | 0           | 1.107500                | -3.399306 | -0.786550 |
| 5             | 6             | 0           | -0.154461               | -3.926198 | -0.470758 |
| 6             | 6             | 0           | -0.741705               | -4.738057 | -1.451285 |
| 7             | 6             | 0           | -2.012843               | -5.258264 | -1.244064 |
| 8             | 1             | 0           | -2.480549               | -5.857151 | -2.016762 |
| 9             | 6             | 0           | -2.686318               | -5.009419 | -0.046169 |
| 10            | 6             | 0           | -2.071785               | -4.263017 | 0.958827  |
| 11            | 1             | 0           | -2.586801               | -4.084028 | 1.894173  |
| 12            | 6             | 0           | -0.803362               | -3.729516 | 0.759749  |
| 13            | 1             | 0           | -0.305392               | -3.187150 | 1.552793  |
| 14            | 6             | 0           | 2.778054                | -1.843036 | -0.718502 |
| 15            | 6             | 0           | 3.217662                | -0.525315 | -0.457767 |
| 16            | 6             | 0           | 4.576490                | -0.256901 | -0.723101 |
| 17            | 1             | 0           | 4.950150                | 0.745436  | -0.564050 |
| 18            | 6             | 0           | 5.446588                | -1.225656 | -1.200336 |
| 19            | 1             | 0           | 6.484680                | -0.971088 | -1.385875 |



|    |    |   |           |           |           |    |    |   |           |           |           |
|----|----|---|-----------|-----------|-----------|----|----|---|-----------|-----------|-----------|
| 20 | 6  | 0 | 4.986075  | -2.524532 | -1.448089 | 4  | 7  | 0 | 2.566619  | 2.007623  | 0.882626  |
| 21 | 1  | 0 | 5.659005  | -3.287698 | -1.821204 | 5  | 6  | 0 | 3.511059  | 0.969408  | 0.939780  |
| 22 | 6  | 0 | 3.663633  | -2.829826 | -1.208037 | 6  | 6  | 0 | 4.638093  | 1.123335  | 0.120184  |
| 23 | 1  | 0 | 3.290045  | -3.828213 | -1.384800 | 7  | 6  | 0 | 5.580062  | 0.103789  | 0.050700  |
| 24 | 16 | 0 | 2.500795  | 2.192545  | -1.653258 | 8  | 1  | 0 | 6.429897  | 0.202888  | -0.614260 |
| 25 | 6  | 0 | 2.164723  | 3.883014  | -0.998401 | 9  | 6  | 0 | 5.426668  | -1.047380 | 0.825233  |
| 26 | 1  | 0 | 1.910723  | 4.526764  | -1.840791 | 10 | 6  | 0 | 4.343890  | -1.166210 | 1.696069  |
| 27 | 1  | 0 | 3.056024  | 4.288472  | -0.510147 | 11 | 1  | 0 | 4.230930  | -2.055026 | 2.303470  |
| 28 | 6  | 0 | 1.008628  | 3.867092  | -0.006033 | 12 | 6  | 0 | 3.389416  | -0.159330 | 1.767406  |
| 29 | 1  | 0 | 0.843217  | 4.880651  | 0.387469  | 13 | 1  | 0 | 2.568052  | -0.230327 | 2.468915  |
| 30 | 6  | 0 | -0.308711 | 3.445054  | -0.650825 | 14 | 6  | 0 | 0.451379  | 2.870443  | 0.966366  |
| 31 | 8  | 0 | -1.053172 | 2.624668  | -0.123954 | 15 | 6  | 0 | -0.941836 | 2.704796  | 0.788834  |
| 32 | 8  | 0 | -0.562433 | 4.065960  | -1.763091 | 16 | 6  | 0 | -1.723325 | 3.875112  | 0.863609  |
| 33 | 7  | 0 | 1.315917  | 2.927011  | 1.108051  | 17 | 1  | 0 | -2.790510 | 3.800781  | 0.703708  |
| 34 | 1  | 0 | 2.045065  | 3.340608  | 1.685596  | 18 | 6  | 0 | -1.171730 | 5.122848  | 1.119084  |
| 35 | 1  | 0 | 0.487034  | 2.847167  | 1.697397  | 19 | 1  | 0 | -1.816400 | 5.993600  | 1.174445  |
| 36 | 16 | 0 | 1.592806  | -0.515788 | 2.178131  | 20 | 6  | 0 | 0.208650  | 5.257429  | 1.303677  |
| 37 | 6  | 0 | 0.505759  | 0.442308  | 3.328883  | 21 | 1  | 0 | 0.646963  | 6.226710  | 1.510541  |
| 38 | 1  | 0 | 0.654878  | 0.040716  | 4.332302  | 22 | 6  | 0 | 1.012698  | 4.139195  | 1.227058  |
| 39 | 1  | 0 | 0.843899  | 1.476708  | 3.330292  | 23 | 1  | 0 | 2.080700  | 4.217920  | 1.373319  |
| 40 | 6  | 0 | -0.978830 | 0.352866  | 2.956228  | 24 | 16 | 0 | -2.670737 | 1.772457  | -1.579137 |
| 41 | 1  | 0 | -1.409275 | -0.571720 | 3.338773  | 25 | 6  | 0 | -4.096886 | 0.634115  | -1.838074 |
| 42 | 7  | 0 | -1.202427 | 0.367898  | 1.488499  | 26 | 1  | 0 | -4.305228 | 0.589365  | -2.907364 |
| 43 | 1  | 0 | -1.079007 | 1.307827  | 1.086413  | 27 | 1  | 0 | -4.987634 | 1.018083  | -1.331935 |
| 44 | 6  | 0 | -1.686088 | 1.560060  | 3.573116  | 28 | 6  | 0 | -3.791961 | -0.764400 | -1.316312 |
| 45 | 8  | 0 | -2.516323 | 1.229035  | 4.570795  | 29 | 1  | 0 | -4.669020 | -1.414515 | -1.455707 |
| 46 | 8  | 0 | -1.478890 | 2.692130  | 3.205786  | 30 | 6  | 0 | -2.640330 | -1.442511 | -2.050976 |
| 47 | 1  | 0 | -3.681672 | -5.407599 | 0.110870  | 31 | 8  | 0 | -2.635610 | -1.237029 | -3.358266 |
| 48 | 1  | 0 | -2.178222 | 0.071556  | 1.316584  | 32 | 8  | 0 | -1.813928 | -2.124132 | -1.477707 |
| 49 | 1  | 0 | -0.205513 | -4.910653 | -2.376449 | 33 | 7  | 0 | -3.427741 | -0.692670 | 0.127852  |
| 50 | 7  | 0 | -4.379896 | 0.261741  | -1.792959 | 34 | 1  | 0 | -4.264867 | -0.454678 | 0.655883  |
| 51 | 6  | 0 | -3.158109 | 1.137064  | -1.760273 | 35 | 1  | 0 | -3.142303 | -1.621807 | 0.441885  |
| 52 | 6  | 0 | -1.902675 | 0.444497  | -2.258257 | 36 | 16 | 0 | -0.898575 | 0.219271  | 2.604007  |
| 53 | 1  | 0 | -3.028189 | 1.461328  | -0.729468 | 37 | 6  | 0 | -1.518656 | -1.501078 | 2.901705  |
| 54 | 6  | 0 | -3.553105 | 2.405967  | -2.620783 | 38 | 1  | 0 | -1.488204 | -1.678753 | 3.977822  |
| 55 | 16 | 0 | -1.479285 | -1.173375 | -1.422549 | 39 | 1  | 0 | -2.559971 | -1.538949 | 2.587570  |
| 56 | 1  | 0 | -1.049906 | 1.104846  | -2.127231 | 40 | 6  | 0 | -0.689058 | -2.570863 | 2.177910  |
| 57 | 1  | 0 | -1.985131 | 0.199427  | -3.319475 | 41 | 1  | 0 | 0.183324  | -2.839789 | 2.772225  |
| 58 | 8  | 0 | -4.759230 | 2.448480  | -2.925677 | 42 | 7  | 0 | -0.197034 | -2.119393 | 0.855067  |
| 59 | 8  | 0 | -2.641541 | 3.213841  | -2.895417 | 43 | 1  | 0 | -0.941198 | -2.152253 | 0.151632  |
| 60 | 1  | 0 | -2.923603 | 2.041032  | 4.913114  | 44 | 6  | 0 | -1.579434 | -3.795700 | 1.963772  |
| 61 | 1  | 0 | -4.563829 | -0.159120 | -0.850251 | 45 | 8  | 0 | -1.136462 | -4.889857 | 2.593748  |
| 62 | 1  | 0 | -4.306017 | -0.488400 | -2.478891 | 46 | 8  | 0 | -2.589431 | -3.757230 | 1.298793  |
| 63 | 1  | 0 | -5.101933 | 0.949745  | -2.139772 | 47 | 1  | 0 | 6.150973  | -1.849803 | 0.755094  |
| 64 | 1  | 0 | -1.427538 | 3.705098  | -2.195680 | 48 | 1  | 0 | 0.560001  | -2.765193 | 0.513269  |
| 65 | 17 | 0 | -4.028275 | -1.011513 | 0.959658  | 49 | 1  | 0 | -1.770471 | -1.545484 | -3.718938 |
| 66 | 1  | 0 | -2.582681 | -1.299715 | -0.590235 | 50 | 1  | 0 | 4.724713  | 2.015314  | -0.486552 |
|    |    |   |           |           |           | 51 | 7  | 0 | 1.593172  | -0.611010 | -1.001587 |
|    |    |   |           |           |           | 52 | 6  | 0 | 0.719517  | -0.305180 | -2.150857 |
|    |    |   |           |           |           | 53 | 6  | 0 | 0.784958  | 1.175572  | -2.565329 |
|    |    |   |           |           |           | 54 | 1  | 0 | -0.309698 | -0.473310 | -1.851275 |
|    |    |   |           |           |           | 55 | 6  | 0 | 0.941493  | -1.226853 | -3.341141 |
|    |    |   |           |           |           | 56 | 16 | 0 | 2.465928  | 1.853924  | -2.868277 |
|    |    |   |           |           |           | 57 | 1  | 0 | 0.378789  | 1.774261  | -1.750233 |
|    |    |   |           |           |           | 58 | 1  | 0 | 0.142869  | 1.341355  | -3.428892 |
|    |    |   |           |           |           | 59 | 8  | 0 | 2.225800  | -1.541111 | -3.531772 |
|    |    |   |           |           |           | 60 | 8  | 0 | 0.048609  | -1.615863 | -4.066594 |
|    |    |   |           |           |           | 61 | 1  | 0 | 2.797242  | 1.040721  | -3.891827 |

HF=-3453.6804352\ZeroPoint=0.4611221\Thermal=0.5025944

G = -18.6 kcal mol<sup>-1</sup>

| Center Number | Atomic Number | Atomic Type | Coordinates (Angstroms) |           |          |
|---------------|---------------|-------------|-------------------------|-----------|----------|
|               |               |             | X                       | Y         | Z        |
| 1             | 46            | 0           | 0.584829                | -0.200217 | 0.841333 |
| 2             | 46            | 0           | -1.999701               | 0.997868  | 0.528068 |
| 3             | 7             | 0           | 1.339301                | 1.739578  | 0.908460 |

|    |    |   |           |           |           |
|----|----|---|-----------|-----------|-----------|
| 62 | 1  | 0 | -1.734311 | -5.626059 | 2.386836  |
| 63 | 1  | 0 | 1.838134  | -1.626836 | -0.945664 |
| 64 | 1  | 0 | 2.478818  | -0.116109 | -1.110274 |
| 65 | 1  | 0 | 2.285469  | -2.207776 | -4.233937 |
| 66 | 17 | 0 | 2.175365  | -3.598416 | -0.371318 |

HF=-3453.6836939\ZeroPoint=0.4619005\Thermal=0.5040161

G = -14.2 kcal mol<sup>-1</sup>

| Center Number | Atomic Number | Atomic Type | Coordinates (Angstroms) |           |           |
|---------------|---------------|-------------|-------------------------|-----------|-----------|
|               |               |             | X                       | Y         | Z         |
| 1             | 46            | 0           | -1.298900               | -0.461430 | 0.084389  |
| 2             | 46            | 0           | 0.182339                | 1.405658  | -1.496276 |
| 3             | 7             | 0           | -2.471289               | 1.121613  | 0.679053  |
| 4             | 7             | 0           | -3.646482               | 1.011760  | 1.099070  |
| 5             | 6             | 0           | -4.193268               | -0.259424 | 1.361157  |
| 6             | 6             | 0           | -3.534677               | -1.267816 | 2.079360  |
| 7             | 6             | 0           | -4.185970               | -2.477141 | 2.305318  |
| 8             | 1             | 0           | -3.681085               | -3.252750 | 2.869546  |
| 9             | 6             | 0           | -5.475268               | -2.689996 | 1.818131  |
| 10            | 6             | 0           | -6.136292               | -1.672797 | 1.126307  |
| 11            | 1             | 0           | -7.144678               | -1.828451 | 0.760958  |
| 12            | 6             | 0           | -5.510057               | -0.449533 | 0.920300  |
| 13            | 1             | 0           | -6.011585               | 0.359171  | 0.402717  |
| 14            | 6             | 0           | -2.006202               | 2.461124  | 0.462473  |
| 15            | 6             | 0           | -0.983862               | 2.731047  | -0.479976 |
| 16            | 6             | 0           | -0.746288               | 4.097076  | -0.738462 |
| 17            | 1             | 0           | 0.010639                | 4.367580  | -1.460839 |
| 18            | 6             | 0           | -1.416486               | 5.114286  | -0.071235 |
| 19            | 1             | 0           | -1.179968               | 6.148132  | -0.299452 |
| 20            | 6             | 0           | -2.361389               | 4.811895  | 0.914462  |
| 21            | 1             | 0           | -2.854205               | 5.600185  | 1.471237  |
| 22            | 6             | 0           | -2.660122               | 3.490093  | 1.171671  |
| 23            | 1             | 0           | -3.398853               | 3.224655  | 1.915663  |
| 24            | 16            | 0           | 2.066276                | 2.523462  | -0.668011 |
| 25            | 6             | 0           | 3.254112                | 1.951021  | -1.952309 |
| 26            | 1             | 0           | 4.265057                | 2.147596  | -1.594865 |
| 27            | 1             | 0           | 3.107444                | 2.496699  | -2.889278 |
| 28            | 6             | 0           | 3.079985                | 0.456188  | -2.208724 |
| 29            | 1             | 0           | 3.787194                | 0.124104  | -2.981021 |
| 30            | 6             | 0           | 3.417718                | -0.351756 | -0.958052 |
| 31            | 8             | 0           | 4.640332                | -0.128696 | -0.582670 |
| 32            | 8             | 0           | 2.623739                | -1.126471 | -0.420794 |
| 33            | 7             | 0           | 1.682279                | 0.197641  | -2.645545 |
| 34            | 1             | 0           | 1.583402                | 0.562784  | -3.591218 |
| 35            | 1             | 0           | 1.549965                | -0.811105 | -2.720968 |
| 36            | 16            | 0           | -1.844960               | 0.079253  | -2.102019 |
| 37            | 6             | 0           | -1.221492               | -1.442578 | -2.960254 |
| 38            | 1             | 0           | -2.030567               | -1.819455 | -3.587056 |
| 39            | 1             | 0           | -0.405709               | -1.145486 | -3.616801 |
| 40            | 6             | 0           | -0.777251               | -2.551413 | -1.988697 |
| 41            | 1             | 0           | -1.639752               | -3.152219 | -1.704328 |
| 42            | 7             | 0           | -0.186558               | -2.013166 | -0.739781 |
| 43            | 1             | 0           | 0.766190                | -1.652579 | -0.874393 |
| 44            | 6             | 0           | 0.261381                | -3.417376 | -2.698661 |
| 45            | 8             | 0           | -0.172435               | -4.658726 | -2.956602 |

|    |    |   |           |           |           |
|----|----|---|-----------|-----------|-----------|
| 46 | 8  | 0 | 1.355368  | -3.005065 | -3.006125 |
| 47 | 1  | 0 | -5.972260 | -3.637124 | 1.994146  |
| 48 | 1  | 0 | -0.113505 | -2.726948 | -0.005639 |
| 49 | 1  | 0 | -2.548857 | -1.091523 | 2.485267  |
| 50 | 7  | 0 | 2.840676  | -1.931246 | 2.298708  |
| 51 | 6  | 0 | 1.760440  | -1.083285 | 2.901984  |
| 52 | 1  | 0 | 2.644709  | -2.918292 | 2.464480  |
| 53 | 6  | 0 | 2.059674  | 0.402927  | 2.720461  |
| 54 | 1  | 0 | 1.708488  | -1.328526 | 3.965353  |
| 55 | 6  | 0 | 0.454424  | -1.547737 | 2.207066  |
| 56 | 16 | 0 | 3.414285  | 1.039278  | 3.785549  |
| 57 | 1  | 0 | 1.168865  | 0.955862  | 3.012156  |
| 58 | 1  | 0 | 2.246022  | 0.649739  | 1.673252  |
| 59 | 8  | 0 | -0.416224 | -0.639073 | 2.013008  |
| 60 | 8  | 0 | 0.392247  | -2.736384 | 1.856786  |
| 61 | 1  | 0 | 4.449005  | 0.492554  | 3.101895  |
| 62 | 1  | 0 | 2.837708  | -1.789005 | 1.269648  |
| 63 | 1  | 0 | 0.532547  | -5.141411 | -3.418358 |
| 64 | 1  | 0 | 3.828412  | -1.701193 | 2.574104  |
| 65 | 1  | 0 | 4.956211  | -0.612068 | 0.269085  |
| 66 | 17 | 0 | 5.726003  | -1.318061 | 1.855878  |

HF=-3453.6768457\ZeroPoint=0.4617086\Thermal=0.5033985

G = -4.8 kcal mol<sup>-1</sup>

| Center Number | Atomic Number | Atomic Type | Coordinates (Angstroms) |           |           |
|---------------|---------------|-------------|-------------------------|-----------|-----------|
|               |               |             | X                       | Y         | Z         |
| 1             | 46            | 0           | -1.280158               | -0.680552 | -0.073761 |
| 2             | 46            | 0           | 1.538272                | 0.701901  | -0.438708 |
| 3             | 7             | 0           | -1.916698               | 1.280926  | 0.158897  |
| 4             | 7             | 0           | -3.086601               | 1.548705  | 0.520047  |
| 5             | 6             | 0           | -4.087141               | 0.565365  | 0.506071  |
| 6             | 6             | 0           | -4.296277               | -0.257380 | -0.610348 |
| 7             | 6             | 0           | -5.361903               | -1.151379 | -0.610382 |
| 8             | 1             | 0           | -5.537402               | -1.775545 | -1.479629 |
| 9             | 6             | 0           | -6.207581               | -1.238311 | 0.494656  |
| 10            | 6             | 0           | -6.010250               | -0.395716 | 1.591007  |
| 11            | 1             | 0           | -6.670954               | -0.456383 | 2.447799  |
| 12            | 6             | 0           | -4.972855               | 0.526055  | 1.587781  |
| 13            | 1             | 0           | -4.803401               | 1.186217  | 2.428956  |
| 14            | 6             | 0           | -1.086704               | 2.428082  | -0.110962 |
| 15            | 6             | 0           | 0.292094                | 2.304299  | -0.374608 |
| 16            | 6             | 0           | 0.964580                | 3.493577  | -0.733062 |
| 17            | 1             | 0           | 2.027449                | 3.455955  | -0.928243 |
| 18            | 6             | 0           | 0.326493                | 4.720571  | -0.825341 |
| 19            | 1             | 0           | 0.892424                | 5.600845  | -1.111330 |
| 20            | 6             | 0           | -1.039535               | 4.818750  | -0.543890 |
| 21            | 1             | 0           | -1.553630               | 5.770566  | -0.610309 |
| 22            | 6             | 0           | -1.736434               | 3.681450  | -0.198170 |
| 23            | 1             | 0           | -2.798323               | 3.729376  | -0.004557 |
| 24            | 16            | 0           | 2.746502                | 1.659553  | 1.332713  |
| 25            | 6             | 0           | 4.408190                | 1.381647  | 0.601734  |
| 26            | 1             | 0           | 5.165296                | 1.644878  | 1.341276  |
| 27            | 1             | 0           | 4.565338                | 2.010005  | -0.280682 |
| 28            | 6             | 0           | 4.555192                | -0.085857 | 0.196168  |
| 29            | 1             | 0           | 5.554118                | -0.256986 | -0.234725 |

|                                                        |    |   |           |           |           |       |    |   |           |           |           |
|--------------------------------------------------------|----|---|-----------|-----------|-----------|-------|----|---|-----------|-----------|-----------|
| 30                                                     | 6  | 0 | 4.488726  | -0.997878 | 1.410404  | 28    | 6  | 0 | 2.904934  | -1.641476 | -0.693385 |
| 31                                                     | 8  | 0 | 5.365588  | -0.627357 | 2.348564  | 29    | 1  | 0 | 2.300657  | -2.122202 | 0.081141  |
| 32                                                     | 8  | 0 | 3.810850  | -1.998406 | 1.528889  | 30    | 6  | 0 | 4.130575  | -2.498825 | -0.965918 |
| 33                                                     | 7  | 0 | 3.499575  | -0.440215 | -0.777964 | 31    | 8  | 0 | 3.790936  | -3.777221 | -1.233272 |
| 34                                                     | 1  | 0 | 3.745103  | -0.021762 | -1.672270 | 32    | 8  | 0 | 5.268328  | -2.098535 | -0.962188 |
| 35                                                     | 1  | 0 | 3.471342  | -1.447564 | -0.941399 | 33    | 7  | 0 | 3.283564  | -0.305499 | -0.209073 |
| 36                                                     | 16 | 0 | -0.088589 | -0.226009 | -2.041435 | 34    | 1  | 0 | 3.611324  | -0.346240 | 0.753621  |
| 37                                                     | 6  | 0 | 0.123170  | -1.995970 | -2.569689 | 35    | 1  | 0 | 4.065052  | 0.063463  | -0.749898 |
| 38                                                     | 1  | 0 | -0.741177 | -2.220375 | -3.198270 | 36    | 16 | 0 | 0.021554  | -2.752810 | 0.687508  |
| 39                                                     | 1  | 0 | 1.023782  | -2.089326 | -3.176215 | 37    | 6  | 0 | -0.260693 | -2.491231 | 2.505791  |
| 40                                                     | 6  | 0 | 0.180780  | -2.993314 | -1.408641 | 38    | 1  | 0 | -0.853857 | -3.334929 | 2.866269  |
| 41                                                     | 1  | 0 | 0.068074  | -4.007860 | -1.812823 | 39    | 1  | 0 | 0.695098  | -2.494936 | 3.027268  |
| 42                                                     | 7  | 0 | -0.893770 | -2.710413 | -0.425012 | 40    | 6  | 0 | -0.994713 | -1.185922 | 2.807420  |
| 43                                                     | 1  | 0 | -0.691015 | -3.108267 | 0.492327  | 41    | 1  | 0 | -1.522479 | -1.272724 | 3.767333  |
| 44                                                     | 6  | 0 | 1.552403  | -2.968333 | -0.750369 | 42    | 7  | 0 | -1.964537 | -0.883181 | 1.717591  |
| 45                                                     | 8  | 0 | 2.565728  | -3.063462 | -1.414019 | 43    | 1  | 0 | -2.440789 | -0.008133 | 1.929085  |
| 46                                                     | 8  | 0 | 1.502439  | -2.837416 | 0.559593  | 44    | 6  | 0 | -0.144282 | 0.094892  | 2.911595  |
| 47                                                     | 1  | 0 | -7.029195 | -1.945304 | 0.495114  | 45    | 8  | 0 | 1.160603  | -0.110657 | 3.005905  |
| 48                                                     | 1  | 0 | 2.398400  | -2.625781 | 0.930153  | 46    | 8  | 0 | -0.689280 | 1.174117  | 2.900230  |
| 49                                                     | 1  | 0 | -1.783384 | -3.094970 | -0.733750 | 47    | 1  | 0 | -5.671675 | -3.422219 | -0.824603 |
| 50                                                     | 1  | 0 | 5.273010  | -1.230983 | 3.101503  | 48    | 1  | 0 | -2.659210 | -1.618738 | 1.614948  |
| 51                                                     | 1  | 0 | -3.654509 | -0.159187 | -1.476918 | 49    | 1  | 0 | 4.606143  | -4.271625 | -1.409170 |
| 52                                                     | 17 | 0 | -2.061957 | -1.378244 | 2.053351  | 50    | 1  | 0 | -2.518582 | -0.923058 | -2.333398 |
| -----                                                  |    |   |           |           |           | 51    | 1  | 0 | 1.639184  | 0.744654  | 2.837259  |
| HF=-2731.5539789\ZeroPoint=0.3631068\Thermal=0.3956673 |    |   |           |           |           | 52    | 17 | 0 | 2.659135  | 2.185052  | 1.636885  |
| -----                                                  |    |   |           |           |           | ----- |    |   |           |           |           |

G = -17.0 kcal mol<sup>-1</sup>

| Center Number | Atomic Number | Atomic Type | Coordinates (Angstroms) |           |           |
|---------------|---------------|-------------|-------------------------|-----------|-----------|
|               |               |             | X                       | Y         | Z         |
| 1             | 46            | 0           | -0.788932               | -0.705894 | -0.070322 |
| 2             | 46            | 0           | 1.638865                | 1.120441  | -0.263262 |
| 3             | 7             | 0           | -1.794985               | 1.151289  | -0.598215 |
| 4             | 7             | 0           | -3.050430               | 1.158654  | -0.681972 |
| 5             | 6             | 0           | -3.715869               | -0.082205 | -0.750019 |
| 6             | 6             | 0           | -3.339840               | -1.091188 | -1.649005 |
| 7             | 6             | 0           | -4.052873               | -2.285632 | -1.673749 |
| 8             | 1             | 0           | -3.763517               | -3.064764 | -2.368994 |
| 9             | 6             | 0           | -5.127621               | -2.485124 | -0.807032 |
| 10            | 6             | 0           | -5.518247               | -1.466335 | 0.064747  |
| 11            | 1             | 0           | -6.366826               | -1.609457 | 0.723824  |
| 12            | 6             | 0           | -4.832199               | -0.255369 | 0.076514  |
| 13            | 1             | 0           | -5.133430               | 0.555162  | 0.730231  |
| 14            | 6             | 0           | -1.157713               | 2.427978  | -0.659155 |
| 15            | 6             | 0           | 0.239792                | 2.542635  | -0.489345 |
| 16            | 6             | 0           | 0.779480                | 3.842434  | -0.562352 |
| 17            | 1             | 0           | 1.841647                | 3.979769  | -0.408175 |
| 18            | 6             | 0           | -0.007012               | 4.957605  | -0.805949 |
| 19            | 1             | 0           | 0.453644                | 5.938549  | -0.856102 |
| 20            | 6             | 0           | -1.390530               | 4.820145  | -0.981758 |
| 21            | 1             | 0           | -2.011403               | 5.687747  | -1.172604 |
| 22            | 6             | 0           | -1.958473               | 3.567732  | -0.908122 |
| 23            | 1             | 0           | -3.023466               | 3.438385  | -1.039590 |
| 24            | 16            | 0           | 0.673082                | -0.308441 | -1.857215 |
| 25            | 6             | 0           | 2.035670                | -1.557267 | -1.958176 |
| 26            | 1             | 0           | 2.632996                | -1.248118 | -2.820853 |
| 27            | 1             | 0           | 1.600804                | -2.533135 | -2.170820 |

HF=-2731.5732211\ZeroPoint=0.3631944\Thermal=0.3961037

G = -18.8 kcal mol<sup>-1</sup>

| Center Number | Atomic Number | Atomic Type | Coordinates (Angstroms) |           |           |
|---------------|---------------|-------------|-------------------------|-----------|-----------|
|               |               |             | X                       | Y         | Z         |
| 1             | 46            | 0           | 1.042904                | 0.701152  | 0.157748  |
| 2             | 46            | 0           | -1.563885               | 0.590958  | -1.154898 |
| 3             | 7             | 0           | 1.667664                | -0.811231 | -1.091530 |
| 4             | 7             | 0           | 2.855691                | -1.123273 | -1.331528 |
| 5             | 6             | 0           | 3.914965                | -0.357351 | -0.806046 |
| 6             | 6             | 0           | 5.015197                | -1.068052 | -0.310897 |
| 7             | 6             | 0           | 6.105696                | -0.376354 | 0.202509  |
| 8             | 1             | 0           | 6.939616                | -0.927456 | 0.620861  |
| 9             | 6             | 0           | 6.134450                | 1.018745  | 0.166185  |
| 10            | 6             | 0           | 5.067829                | 1.721222  | -0.394512 |
| 11            | 1             | 0           | 5.107915                | 2.802278  | -0.467320 |
| 12            | 6             | 0           | 3.953209                | 1.043060  | -0.876574 |
| 13            | 1             | 0           | 3.145696                | 1.580089  | -1.353305 |
| 14            | 6             | 0           | 0.662949                | -1.613358 | -1.752808 |
| 15            | 6             | 0           | -0.654040               | -1.120199 | -1.915861 |
| 16            | 6             | 0           | -1.508283               | -1.960447 | -2.661586 |
| 17            | 1             | 0           | -2.517680               | -1.630941 | -2.880361 |
| 18            | 6             | 0           | -1.128361               | -3.208140 | -3.138353 |
| 19            | 1             | 0           | -1.840350               | -3.814411 | -3.688173 |
| 20            | 6             | 0           | 0.162887                | -3.687659 | -2.894784 |
| 21            | 1             | 0           | 0.463190                | -4.671737 | -3.234898 |
| 22            | 6             | 0           | 1.060095                | -2.883953 | -2.219868 |
| 23            | 1             | 0           | 2.071520                | -3.220623 | -2.035750 |
| 24            | 16            | 0           | -2.736229               | 2.401904  | -0.117319 |
| 25            | 6             | 0           | -4.307528               | 1.522427  | 0.245064  |

|                                                        |        |        |                         |           |           |    |    |   |           |           |           |          |
|--------------------------------------------------------|--------|--------|-------------------------|-----------|-----------|----|----|---|-----------|-----------|-----------|----------|
| 26                                                     | 1      | 0      | -4.970258               | 1.605566  | -0.621064 | 10 | 6  | 0 | 5.302214  | 0.922190  | -0.767591 |          |
| 27                                                     | 1      | 0      | -4.796083               | 1.995878  | 1.097526  | 11 | 1  | 0 | 5.468596  | 1.914315  | -1.171753 |          |
| 28                                                     | 6      | 0      | -4.035721               | 0.049463  | 0.551359  | 12 | 6  | 0 | 4.170003  | 0.208135  | -1.148981 |          |
| 29                                                     | 1      | 0      | -3.470866               | -0.045307 | 1.477176  | 13 | 1  | 0 | 3.467824  | 0.620297  | -1.861396 |          |
| 30                                                     | 6      | 0      | -5.354460               | -0.699528 | 0.693325  | 14 | 6  | 0 | 0.639964  | -2.259117 | -1.337679 |          |
| 31                                                     | 8      | 0      | -5.891008               | -0.535218 | 1.916347  | 15 | 6  | 0 | -0.652871 | -1.717921 | -1.515348 |          |
| 32                                                     | 8      | 0      | -5.890529               | -1.308402 | -0.199817 | 16 | 6  | 0 | -1.591867 | -2.619788 | -2.066386 |          |
| 33                                                     | 7      | 0      | -3.230995               | -0.563537 | -0.532493 | 17 | 1  | 0 | -2.588463 | -2.267903 | -2.309074 |          |
| 34                                                     | 1      | 0      | -2.927541               | -1.484280 | -0.192568 | 18 | 6  | 0 | -1.305344 | -3.947746 | -2.348684 |          |
| 35                                                     | 1      | 0      | -3.849102               | -0.739539 | -1.324685 | 19 | 1  | 0 | -2.077681 | -4.590356 | -2.758369 |          |
| 36                                                     | 16     | 0      | 0.315953                | 1.914787  | -1.766212 | 20 | 6  | 0 | -0.028542 | -4.458926 | -2.091287 |          |
| 37                                                     | 6      | 0      | 0.144414                | 3.578129  | -0.960823 | 21 | 1  | 0 | 0.196747  | -5.503975 | -2.266024 |          |
| 38                                                     | 1      | 0      | 0.703315                | 4.287769  | -1.568816 | 22 | 6  | 0 | 0.941595  | -3.614052 | -1.601247 |          |
| 39                                                     | 1      | 0      | -0.906342               | 3.865142  | -0.980538 | 23 | 1  | 0 | 1.934708  | -3.981599 | -1.387507 |          |
| 40                                                     | 6      | 0      | 0.702158                | 3.588959  | 0.473352  | 24 | 16 | 0 | -2.855177 | 2.134184  | -1.437234 |          |
| 41                                                     | 1      | 0      | 1.795184                | 3.613326  | 0.420043  | 25 | 6  | 0 | -4.406510 | 1.427990  | -0.746567 |          |
| 42                                                     | 7      | 0      | 0.325967                | 2.360197  | 1.210117  | 26 | 1  | 0 | -5.008749 | 0.984441  | -1.547285 |          |
| 43                                                     | 1      | 0      | -0.702736               | 2.280221  | 1.233437  | 27 | 1  | 0 | -4.984381 | 2.230182  | -0.287704 |          |
| 44                                                     | 6      | 0      | 0.281870                | 4.827985  | 1.261015  | 28 | 6  | 0 | -4.075589 | 0.373099  | 0.308704  |          |
| 45                                                     | 8      | 0      | 0.471999                | 5.953935  | 0.543934  | 29 | 1  | 0 | -3.523875 | 0.853587  | 1.122845  |          |
| 46                                                     | 8      | 0      | -0.130708               | 4.809263  | 2.390589  | 30 | 6  | 0 | -5.325670 | -0.285024 | 0.863576  |          |
| 47                                                     | 1      | 0      | 6.994394                | 1.554165  | 0.551575  | 31 | 8  | 0 | -6.085933 | 0.588437  | 1.552105  |          |
| 48                                                     | 1      | 0      | 0.648108                | 2.407314  | 2.175453  | 32 | 8  | 0 | -5.627256 | -1.445282 | 0.704093  |          |
| 49                                                     | 1      | 0      | -6.728269               | -1.023056 | 1.940170  | 33 | 7  | 0 | -3.187862 | -0.660651 | -0.283728 |          |
| 50                                                     | 1      | 0      | 4.979331                | -2.149145 | -0.294328 | 34 | 1  | 0 | -2.855341 | -1.278126 | 0.456744  |          |
| 51                                                     | 7      | 0      | -0.219422               | -3.978919 | 1.904670  | 35 | 1  | 0 | -3.741243 | -1.253961 | -0.900132 |          |
| 52                                                     | 6      | 0      | 0.775348                | -2.919427 | 1.552883  | 36 | 16 | 0 | 0.496921  | 1.270839  | -1.898763 |          |
| 53                                                     | 6      | 0      | 0.630934                | -1.732938 | 2.517044  | 37 | 6  | 0 | 0.323422  | 3.044536  | -1.353486 |          |
| 54                                                     | 1      | 0      | 0.509957                | -2.586347 | 0.546807  | 38 | 1  | 0 | 0.596124  | 3.675510  | -2.196985 |          |
| 55                                                     | 6      | 0      | 2.150062                | -3.618262 | 1.457834  | 39 | 1  | 0 | -0.718084 | 3.224953  | -1.087271 |          |
| 56                                                     | 16     | 0      | 1.789508                | -0.338750 | 2.165884  | 40 | 6  | 0 | 1.234042  | 3.315566  | -0.161411 |          |
| 57                                                     | 1      | 0      | 0.846321                | -2.053058 | 3.541895  | 41 | 1  | 0 | 2.279360  | 3.250645  | -0.486187 |          |
| 58                                                     | 1      | 0      | -0.403148               | -1.387796 | 2.478145  | 42 | 7  | 0 | 1.024051  | 2.287290  | 0.881466  |          |
| 59                                                     | 8      | 0      | 3.223634                | -2.850313 | 1.446881  | 43 | 1  | 0 | 0.038711  | 2.243439  | 1.231756  |          |
| 60                                                     | 8      | 0      | 2.209403                | -4.823106 | 1.357023  | 44 | 6  | 0 | 1.080370  | 4.713240  | 0.439596  |          |
| 61                                                     | 17     | 0      | -2.892397               | -2.897365 | 1.608396  | 45 | 8  | 0 | 0.906111  | 5.652844  | -0.509853 |          |
| 62                                                     | 1      | 0      | 0.203087                | 6.707331  | 1.092136  | 46 | 8  | 0 | 1.162426  | 4.949136  | 1.616034  |          |
| 63                                                     | 1      | 0      | -1.253910               | -3.609962 | 1.759497  | 47 | 1  | 0 | 7.097091  | 0.931911  | 0.420952  |          |
| 64                                                     | 1      | 0      | -0.120757               | -4.262669 | 2.879973  | 48 | 1  | 0 | 1.581040  | 2.515624  | 1.703347  |          |
| 65                                                     | 1      | 0      | -0.044562               | -4.811065 | 1.337034  | 49 | 1  | 0 | -6.871017 | 0.114675  | 1.866158  |          |
| 66                                                     | 1      | 0      | 2.975433                | -1.888470 | 1.613544  | 50 | 1  | 0 | 4.769269  | -2.685225 | 0.543195  |          |
| -----                                                  |        |        |                         |           |           |    | 51 | 7 | 0         | -1.778888 | -1.803050 | 2.618440 |
| HF=-3453.6824633\ZeroPoint=0.4627154\Thermal=0.5049534 |        |        |                         |           |           |    | 52 | 6 | 0         | -0.394469 | -1.774839 | 2.140086 |
| G = -5.4 kcal mol <sup>-1</sup>                        |        |        |                         |           |           |    | 53 | 6 | 0         | 0.600301  | -1.089122 | 3.083663 |
| -----                                                  |        |        |                         |           |           |    | 54 | 1 | 0         | -0.421796 | -1.190397 | 1.212761 |
| Center                                                 | Atomic | Atomic | Coordinates (Angstroms) |           |           | 55 | 6  | 0 | 0.059425  | -3.178336 | 1.730383  |          |
| Number                                                 | Number | Type   | X                       | Y         | Z         | 56 | 16 | 0 | 2.129190  | -0.483944 | 2.236155  |          |
| -----                                                  |        |        |                         |           |           |    | 57 | 1 | 0         | 0.931147  | -1.742882 | 3.892583 |
| 1                                                      | 46     | 0      | 1.355115                | 0.387599  | 0.090358  | 58 | 1  | 0 | 0.136204  | -0.186153 | 3.478972  |          |
| 2                                                      | 46     | 0      | -1.497284               | 0.181276  | -1.281931 | 59 | 8  | 0 | 1.219982  | -3.515195 | 1.672774  |          |
| 3                                                      | 7      | 0      | 1.712834                | -1.427010 | -0.877642 | 60 | 8  | 0 | -0.935750 | -4.006910 | 1.403579  |          |
| 4                                                      | 7      | 0      | 2.870539                | -1.880818 | -1.026324 | 61 | 17 | 0 | -1.522389 | 1.440016  | 2.409193  |          |
| 5                                                      | 6      | 0      | 3.970796                | -1.083478 | -0.641608 | 62 | 1  | 0 | -1.767610 | -3.518385 | 1.573042  |          |
| 6                                                      | 6      | 0      | 4.923499                | -1.669488 | 0.198103  | 63 | 1  | 0 | 0.840398  | 6.514499  | -0.069393 |          |
| 7                                                      | 6      | 0      | 6.032591                | -0.931099 | 0.598793  | 64 | 1  | 0 | -2.092935 | -0.828286 | 2.680941  |          |
| 8                                                      | 1      | 0      | 6.754779                | -1.373252 | 1.274998  | 65 | 1  | 0 | -1.843510 | -2.197842 | 3.554125  |          |
| 9                                                      | 6      | 0      | 6.223468                | 0.365821  | 0.119927  | 66 | 1  | 0 | 2.561813  | -1.705950 | 1.859539  |          |
| -----                                                  |        |        |                         |           |           |    |    |   |           |           |           |          |

HF=-3453.6592879\ZeroPoint=0.4609749\Thermal=0.5037983

G = -12.7 kcal mol<sup>-1</sup>

| Center Number | Atomic Number | Atomic Type | Coordinates (Angstroms) |           |           |
|---------------|---------------|-------------|-------------------------|-----------|-----------|
|               |               |             | X                       | Y         | Z         |
| 1             | 46            | 0           | 0.945533                | 0.648138  | 0.083389  |
| 2             | 46            | 0           | -1.653123               | 0.063203  | -1.280282 |
| 3             | 7             | 0           | 1.811833                | -0.803722 | -1.076411 |
| 4             | 7             | 0           | 3.018392                | -0.930299 | -1.362838 |
| 5             | 6             | 0           | 3.947135                | 0.053441  | -0.955341 |
| 6             | 6             | 0           | 5.130353                | -0.409061 | -0.368232 |
| 7             | 6             | 0           | 6.087909                | 0.510386  | 0.045472  |
| 8             | 1             | 0           | 6.986456                | 0.157222  | 0.537279  |
| 9             | 6             | 0           | 5.900237                | 1.874890  | -0.179553 |
| 10            | 6             | 0           | 4.746146                | 2.322937  | -0.822723 |
| 11            | 1             | 0           | 4.616313                | 3.378092  | -1.035272 |
| 12            | 6             | 0           | 3.759497                | 1.420072  | -1.205867 |
| 13            | 1             | 0           | 2.879892                | 1.756025  | -1.736391 |
| 14            | 6             | 0           | 0.930281                | -1.854980 | -1.530130 |
| 15            | 6             | 0           | -0.452266               | -1.602998 | -1.726930 |
| 16            | 6             | 0           | -1.161708               | -2.698667 | -2.265250 |
| 17            | 1             | 0           | -2.211177               | -2.581252 | -2.508808 |
| 18            | 6             | 0           | -0.589807               | -3.941712 | -2.508008 |
| 19            | 1             | 0           | -1.200362               | -4.744375 | -2.908205 |
| 20            | 6             | 0           | 0.759861                | -4.165815 | -2.217382 |
| 21            | 1             | 0           | 1.206237                | -5.142409 | -2.362516 |
| 22            | 6             | 0           | 1.524917                | -3.117406 | -1.745158 |
| 23            | 1             | 0           | 2.571588                | -3.252350 | -1.505761 |
| 24            | 16            | 0           | -3.153126               | 1.817624  | -0.671817 |
| 25            | 6             | 0           | -4.580555               | 0.787375  | -0.147782 |
| 26            | 1             | 0           | -5.214229               | 0.574579  | -1.014045 |
| 27            | 1             | 0           | -5.169382               | 1.341377  | 0.583968  |
| 28            | 6             | 0           | -4.066344               | -0.513088 | 0.466351  |
| 29            | 1             | 0           | -3.495202               | -0.290913 | 1.369262  |
| 30            | 6             | 0           | -5.222972               | -1.434366 | 0.816742  |
| 31            | 8             | 0           | -5.871111               | -1.019524 | 1.924816  |
| 32            | 8             | 0           | -5.561404               | -2.397919 | 0.172310  |
| 33            | 7             | 0           | -3.147120               | -1.200946 | -0.469758 |
| 34            | 1             | 0           | -2.646693               | -1.903007 | 0.095591  |
| 35            | 1             | 0           | -3.693680               | -1.682319 | -1.181640 |
| 36            | 16            | 0           | 0.055487                | 1.573597  | -1.893772 |
| 37            | 6             | 0           | -0.382408               | 3.247092  | -1.218444 |
| 38            | 1             | 0           | 0.175862                | 3.977025  | -1.802728 |
| 39            | 1             | 0           | -1.443366               | 3.414148  | -1.392862 |
| 40            | 6             | 0           | -0.022307               | 3.404815  | 0.271857  |
| 41            | 1             | 0           | 1.034731                | 3.682646  | 0.339408  |
| 42            | 7             | 0           | -0.179200               | 2.139976  | 1.026333  |
| 43            | 1             | 0           | -1.154044               | 1.809779  | 0.979829  |
| 44            | 6             | 0           | -0.792127               | 4.528110  | 0.965136  |
| 45            | 8             | 0           | -0.923226               | 5.606337  | 0.167969  |
| 46            | 8             | 0           | -1.184599               | 4.474863  | 2.100587  |
| 47            | 1             | 0           | 6.659001                | 2.584885  | 0.128748  |
| 48            | 1             | 0           | 0.011024                | 2.289492  | 2.015302  |
| 49            | 1             | 0           | -6.613156               | -1.624566 | -2.076087 |
| 50            | 1             | 0           | 5.252846                | -1.469911 | -0.194387 |
| 51            | 7             | 0           | 0.769307                | -2.933430 | 1.650467  |

|    |    |   |           |           |          |
|----|----|---|-----------|-----------|----------|
| 52 | 6  | 0 | 0.239375  | -2.033372 | 2.735293 |
| 53 | 6  | 0 | 1.255747  | -1.028108 | 3.252155 |
| 54 | 1  | 0 | -0.009946 | -2.688811 | 3.574631 |
| 55 | 6  | 0 | -1.107461 | -1.449899 | 2.201507 |
| 56 | 16 | 0 | 2.174695  | 0.008685  | 2.036558 |
| 57 | 1  | 0 | 2.046546  | -1.521982 | 3.819623 |
| 58 | 1  | 0 | 0.717874  | -0.335561 | 3.896970 |
| 59 | 8  | 0 | -1.340212 | -0.248063 | 2.398706 |
| 60 | 8  | 0 | -1.789147 | -2.329138 | 1.612850 |
| 61 | 1  | 0 | -1.399233 | 6.290153  | 0.664285 |
| 62 | 1  | 0 | 1.805031  | -3.169670 | 1.744074 |
| 63 | 1  | 0 | 0.665812  | -2.479738 | 0.737000 |
| 64 | 1  | 0 | 3.001454  | -1.049764 | 1.634952 |
| 65 | 1  | 0 | 0.177467  | -3.762140 | 1.594514 |
| 66 | 17 | 0 | 3.751922  | -2.980481 | 1.576349 |

HF=-3453.6704613\ZeroPoint=0.4585294\Thermal=0.5006846

G = -6.7 kcal mol<sup>-1</sup>

| Center Number | Atomic Number | Atomic Type | Coordinates (Angstroms) |           |           |
|---------------|---------------|-------------|-------------------------|-----------|-----------|
|               |               |             | X                       | Y         | Z         |
| 1             | 46            | 0           | 0.848447                | 0.729092  | -0.100149 |
| 2             | 46            | 0           | -1.719514               | 0.107816  | -1.236935 |
| 3             | 7             | 0           | 1.722783                | -0.616852 | -1.416704 |
| 4             | 7             | 0           | 2.945581                | -0.724007 | -1.661456 |
| 5             | 6             | 0           | 3.864748                | 0.180058  | -1.097224 |
| 6             | 6             | 0           | 5.050973                | -0.378757 | -0.602620 |
| 7             | 6             | 0           | 6.014775                | 0.446594  | -0.034285 |
| 8             | 1             | 0           | 6.918652                | 0.011796  | 0.375957  |
| 9             | 6             | 0           | 5.827313                | 1.830204  | -0.008832 |
| 10            | 6             | 0           | 4.672640                | 3.387061  | -0.559480 |
| 11            | 1             | 0           | 4.546233                | 3.463620  | -0.579470 |
| 12            | 6             | 0           | 3.683337                | 1.570457  | -1.099695 |
| 13            | 1             | 0           | 2.804944                | 1.998185  | -1.563174 |
| 14            | 6             | 0           | 0.861370                | -1.570864 | -2.065961 |
| 15            | 6             | 0           | -0.537825               | -1.381727 | -2.048380 |
| 16            | 6             | 0           | -1.289132               | -2.373267 | -2.713727 |
| 17            | 1             | 0           | -2.368451               | -2.270962 | -2.767556 |
| 18            | 6             | 0           | -0.710544               | -3.483934 | -3.314801 |
| 19            | 1             | 0           | -1.337667               | -4.222128 | -3.803552 |
| 20            | 6             | 0           | 0.678732                | -3.655602 | -3.278630 |
| 21            | 1             | 0           | 1.139587                | -4.529493 | -3.723722 |
| 22            | 6             | 0           | 1.462148                | -2.698772 | -2.664236 |
| 23            | 1             | 0           | 2.535882                | -2.814254 | -2.614783 |
| 24            | 16            | 0           | -3.344407               | 1.635734  | -0.400272 |
| 25            | 6             | 0           | -4.594023               | 0.346472  | -0.004911 |
| 26            | 1             | 0           | -5.062341               | 0.006078  | -0.932772 |
| 27            | 1             | 0           | -5.366049               | 0.779964  | 0.631841  |
| 28            | 6             | 0           | -3.928518               | -0.827112 | 0.719309  |
| 29            | 1             | 0           | -3.585546               | -0.488281 | 1.699227  |
| 30            | 6             | 0           | -4.906865               | -1.971706 | 0.908710  |
| 31            | 8             | 0           | -5.902894               | -1.640387 | 1.752082  |
| 32            | 8             | 0           | -4.836752               | -3.044094 | 0.354608  |
| 33            | 7             | 0           | -2.729222               | -1.318413 | -0.016588 |
| 34            | 1             | 0           | -2.013484               | -1.526301 | 0.686692  |
| 35            | 1             | 0           | -2.958175               | -2.189809 | -0.494010 |

|    |    |   |           |           |           |
|----|----|---|-----------|-----------|-----------|
| 36 | 16 | 0 | -0.170232 | 1.774531  | -1.954035 |
| 37 | 6  | 0 | -0.692084 | 3.355926  | -1.130410 |
| 38 | 1  | 0 | -0.279259 | 4.177459  | -1.713695 |
| 39 | 1  | 0 | -1.777970 | 3.417183  | -1.177455 |
| 40 | 6  | 0 | -0.183127 | 3.448766  | 0.316572  |
| 41 | 1  | 0 | 0.870394  | 3.747221  | 0.290359  |
| 42 | 7  | 0 | -0.243412 | 2.138187  | 1.006629  |
| 43 | 1  | 0 | -1.210327 | 1.777337  | 1.012905  |
| 44 | 6  | 0 | -0.891584 | 4.516777  | 1.150098  |
| 45 | 8  | 0 | -1.169221 | 5.616425  | 0.422149  |
| 46 | 8  | 0 | -1.121159 | 4.407960  | 2.325001  |
| 47 | 1  | 0 | 6.589152  | 2.472898  | 0.416799  |
| 48 | 1  | 0 | -0.011632 | 2.238342  | 1.994853  |
| 49 | 1  | 0 | -6.501790 | -2.399762 | 1.817135  |
| 50 | 1  | 0 | 5.176830  | -1.454343 | -0.639259 |
| 51 | 7  | 0 | 1.531630  | -0.202019 | 1.704801  |
| 52 | 6  | 0 | 2.562764  | -1.253464 | 1.812974  |
| 53 | 1  | 0 | 1.817621  | 0.559936  | 2.316510  |
| 54 | 1  | 0 | 0.608055  | -0.511020 | 2.090258  |
| 55 | 6  | 0 | 2.829885  | -1.663527 | 3.278394  |
| 56 | 1  | 0 | 3.496669  | -0.851872 | 1.416287  |
| 57 | 6  | 0 | 2.256193  | -2.485630 | 0.975500  |
| 58 | 16 | 0 | 1.522044  | -2.645957 | 4.113561  |
| 59 | 1  | 0 | 3.053934  | -0.762047 | 3.855642  |
| 60 | 1  | 0 | 3.717271  | -2.298300 | 3.298485  |
| 61 | 8  | 0 | 0.950943  | -2.636228 | 0.721464  |
| 62 | 8  | 0 | 3.116961  | -3.241678 | 0.597651  |
| 63 | 1  | 0 | 0.481205  | -1.796574 | 3.897373  |
| 64 | 17 | 0 | -1.273751 | -0.397501 | 2.850352  |
| 65 | 1  | 0 | 0.834479  | -3.428303 | 0.173422  |
| 66 | 1  | 0 | -1.595488 | 6.262253  | 1.006910  |

HF=-3453.661093\ZeroPoint=0.4609569\Thermal=0.5037741

G = -12.5 kcal mol<sup>-1</sup>

| Center Number | Atomic Number | Atomic Type | Coordinates (Angstroms) |           |           |
|---------------|---------------|-------------|-------------------------|-----------|-----------|
|               |               |             | X                       | Y         | Z         |
| 1             | 46            | 0           | -1.348361               | 0.068022  | 0.341160  |
| 2             | 46            | 0           | 0.151670                | -0.924889 | -1.896335 |
| 3             | 7             | 0           | -1.536717               | 1.850225  | -0.704165 |
| 4             | 7             | 0           | -2.462966               | 2.680431  | -0.561016 |
| 5             | 6             | 0           | -3.399229               | 2.517668  | 0.480026  |
| 6             | 6             | 0           | -3.052630               | 2.239509  | 1.809886  |
| 7             | 6             | 0           | -4.059877               | 2.136911  | 2.765829  |
| 8             | 1             | 0           | -3.794564               | 1.938665  | 3.798107  |
| 9             | 6             | 0           | -5.398135               | 2.295442  | 2.406977  |
| 10            | 6             | 0           | -5.734568               | 2.594669  | 1.085252  |
| 11            | 1             | 0           | -6.772145               | 2.734440  | 0.805415  |
| 12            | 6             | 0           | -4.737651               | 2.734441  | 0.127161  |
| 13            | 1             | 0           | -4.975376               | 2.986216  | -0.899233 |
| 14            | 6             | 0           | -0.619745               | 2.126097  | -1.775166 |
| 15            | 6             | 0           | 0.030077                | 1.062764  | -2.436657 |
| 16            | 6             | 0           | 0.812179                | 1.430365  | -3.548104 |
| 17            | 1             | 0           | 1.310737                | 0.656060  | -4.122689 |
| 18            | 6             | 0           | 0.983729                | 2.752917  | -3.943227 |
| 19            | 1             | 0           | 1.609810                | 2.983105  | -4.798782 |

|    |    |   |           |           |           |
|----|----|---|-----------|-----------|-----------|
| 20 | 6  | 0 | 0.369701  | 3.784887  | -3.226990 |
| 21 | 1  | 0 | 0.527824  | 4.820066  | -3.504940 |
| 22 | 6  | 0 | -0.439473 | 3.470398  | -2.151923 |
| 23 | 1  | 0 | -0.933099 | 4.248436  | -1.584295 |
| 24 | 16 | 0 | 0.662107  | -3.172778 | -1.144852 |
| 25 | 6  | 0 | 2.451524  | -2.907111 | -0.750954 |
| 26 | 1  | 0 | 3.070785  | -3.302741 | -1.561337 |
| 27 | 1  | 0 | 2.698203  | -3.445823 | 0.164026  |
| 28 | 6  | 0 | 2.718422  | -1.415658 | -0.560994 |
| 29 | 1  | 0 | 2.128467  | -1.067007 | 0.282416  |
| 30 | 6  | 0 | 4.173842  | -1.057688 | -0.279475 |
| 31 | 8  | 0 | 4.474789  | -1.215356 | 1.018454  |
| 32 | 8  | 0 | 4.933057  | -0.636874 | -1.117622 |
| 33 | 7  | 0 | 2.247253  | -0.686142 | -1.762771 |
| 34 | 1  | 0 | 2.461320  | 0.304037  | -1.659186 |
| 35 | 1  | 0 | 2.758739  | -1.009049 | -2.582899 |
| 36 | 16 | 0 | -2.217300 | -1.006691 | -1.542966 |
| 37 | 6  | 0 | -2.618014 | -2.653964 | -0.783505 |
| 38 | 1  | 0 | -3.635233 | -2.906797 | -1.076968 |
| 39 | 1  | 0 | -1.939731 | -3.398614 | -1.196059 |
| 40 | 6  | 0 | -2.514471 | -2.593322 | 0.746182  |
| 41 | 1  | 0 | -3.386337 | -2.053706 | 1.130637  |
| 42 | 7  | 0 | -1.304936 | -1.847075 | 1.152891  |
| 43 | 1  | 0 | -0.470931 | -2.295537 | 0.734151  |
| 44 | 6  | 0 | -2.537698 | -3.967194 | 1.413468  |
| 45 | 8  | 0 | -3.465219 | -4.773320 | 0.858847  |
| 46 | 8  | 0 | -1.847639 | -4.277443 | 2.348542  |
| 47 | 1  | 0 | -6.175375 | 2.207049  | 3.157308  |
| 48 | 1  | 0 | -1.164515 | -1.873496 | 2.160171  |
| 49 | 1  | 0 | 5.288313  | -0.699500 | 1.244648  |
| 50 | 1  | 0 | -2.013619 | 2.152605  | 2.094534  |
| 51 | 7  | 0 | 3.141774  | 0.451393  | 3.196102  |
| 52 | 6  | 0 | 1.956575  | 1.317194  | 2.880878  |
| 53 | 1  | 0 | 3.208771  | 0.249213  | 4.191112  |
| 54 | 6  | 0 | 2.318249  | 2.509354  | 1.990596  |
| 55 | 1  | 0 | 1.567374  | 1.712039  | 3.823714  |
| 56 | 6  | 0 | 0.863292  | 0.404805  | 2.268550  |
| 57 | 16 | 0 | 2.905741  | 2.107249  | 0.294919  |
| 58 | 1  | 0 | 3.078414  | 3.125160  | 2.472701  |
| 59 | 1  | 0 | 1.414634  | 3.103213  | 1.863594  |
| 60 | 8  | 0 | -0.158275 | 1.033676  | 1.837994  |
| 61 | 8  | 0 | 1.071283  | -0.811795 | 2.243023  |
| 62 | 1  | 0 | 4.197084  | 1.875091  | 0.650506  |
| 63 | 17 | 0 | 5.862402  | 1.198264  | 2.319930  |
| 64 | 1  | 0 | 3.003659  | -0.448578 | 2.712505  |
| 65 | 1  | 0 | -3.451176 | -5.618084 | 1.335038  |
| 66 | 1  | 0 | 4.114746  | 0.836627  | 2.883393  |

HF=-3453.6729466\ZeroPoint=0.4611033\Thermal=0.503311

G = -11.7 kcal mol<sup>-1</sup>

| Center Number | Atomic Number | Atomic Type | Coordinates (Angstroms) |           |           |
|---------------|---------------|-------------|-------------------------|-----------|-----------|
|               |               |             | X                       | Y         | Z         |
| 1             | 46            | 0           | 1.029312                | 0.204691  | 0.191843  |
| 2             | 46            | 0           | -1.555922               | -0.173153 | -0.946393 |
| 3             | 7             | 0           | 1.390459                | -1.802397 | -0.189077 |

|    |    |   |           |           |           |    |    |   |           |           |           |
|----|----|---|-----------|-----------|-----------|----|----|---|-----------|-----------|-----------|
| 4  | 7  | 0 | 2.465608  | -2.368763 | 0.105304  | 2  | 46 | 0 | 1.866717  | 0.662764  | -0.852557 |
| 5  | 6  | 0 | 3.566878  | -1.586184 | 0.502774  | 3  | 7  | 0 | -1.439278 | 1.348467  | -0.088750 |
| 6  | 6  | 0 | 4.000071  | -0.485712 | -0.249609 | 4  | 7  | 0 | -2.641003 | 1.692676  | -0.027985 |
| 7  | 6  | 0 | 5.134649  | 0.211232  | 0.153230  | 5  | 6  | 0 | -3.664142 | 0.767260  | -0.288044 |
| 8  | 1  | 0 | 5.484065  | 1.051423  | -0.436260 | 6  | 6  | 0 | -3.643967 | -0.100737 | -1.388836 |
| 9  | 6  | 0 | 5.823808  | -0.171079 | 1.303500  | 7  | 6  | 0 | -4.727629 | -0.943432 | -1.612100 |
| 10 | 6  | 0 | 5.398102  | -1.281491 | 2.034909  | 8  | 1  | 0 | -4.722260 | -1.604858 | -2.471062 |
| 11 | 1  | 0 | 5.934965  | -1.582852 | 2.926624  | 9  | 6  | 0 | -5.819433 | -0.934647 | -0.744557 |
| 12 | 6  | 0 | 4.289065  | -2.008594 | 1.621932  | 10 | 6  | 0 | -5.848587 | -0.043416 | 0.330167  |
| 13 | 1  | 0 | 3.943905  | -2.871715 | 2.176976  | 11 | 1  | 0 | -6.702105 | -0.024434 | 0.997504  |
| 14 | 6  | 0 | 0.367164  | -2.646350 | -0.762518 | 12 | 6  | 0 | -4.789397 | 0.828351  | 0.542147  |
| 15 | 6  | 0 | -0.850739 | -2.083713 | -1.196924 | 13 | 1  | 0 | -4.797163 | 1.531923  | 1.365399  |
| 16 | 6  | 0 | -1.763756 | -2.969016 | -1.802629 | 14 | 6  | 0 | -0.488657 | 2.431521  | 0.058014  |
| 17 | 1  | 0 | -2.706081 | -2.580880 | -2.177092 | 15 | 6  | 0 | 0.866435  | 2.301779  | -0.324695 |
| 18 | 6  | 0 | -1.504168 | -4.325789 | -1.953263 | 16 | 6  | 0 | 1.664242  | 3.457931  | -0.273395 |
| 19 | 1  | 0 | -2.237385 | -4.968724 | -2.428964 | 17 | 1  | 0 | 2.700950  | 3.397114  | -0.573954 |
| 20 | 6  | 0 | -0.295211 | -4.857962 | -1.492963 | 18 | 6  | 0 | 1.173017  | 4.670144  | 0.190743  |
| 21 | 1  | 0 | -0.083052 | -5.915544 | -1.597863 | 19 | 1  | 0 | 1.828256  | 5.533436  | 0.227444  |
| 22 | 6  | 0 | 0.636899  | -4.022222 | -0.908464 | 20 | 6  | 0 | -0.148997 | 4.765862  | 0.633009  |
| 23 | 1  | 0 | 1.582544  | -4.412511 | -0.558807 | 21 | 1  | 0 | -0.533596 | 5.698336  | 1.029056  |
| 24 | 16 | 0 | -2.547622 | 1.967076  | -0.429284 | 22 | 6  | 0 | -0.970623 | 3.659803  | 0.556269  |
| 25 | 6  | 0 | -3.848695 | 1.363071  | 0.724062  | 23 | 1  | 0 | -2.002532 | 3.719319  | 0.871352  |
| 26 | 1  | 0 | -4.785744 | 1.219962  | 0.175601  | 24 | 16 | 0 | 0.244240  | 0.060785  | -2.447568 |
| 27 | 1  | 0 | -4.021011 | 2.110024  | 1.498698  | 25 | 6  | 0 | 0.745379  | -1.656516 | -2.938734 |
| 28 | 6  | 0 | -3.437629 | 0.036779  | 1.378307  | 26 | 1  | 0 | 1.594748  | -1.592725 | -3.621460 |
| 29 | 1  | 0 | -2.552073 | 0.199455  | 1.996782  | 27 | 1  | 0 | -0.104832 | -2.051935 | -3.498364 |
| 30 | 6  | 0 | -4.562555 | -0.506188 | 2.249067  | 28 | 6  | 0 | 1.066216  | -2.614916 | -1.786822 |
| 31 | 8  | 0 | -4.724526 | 0.232825  | 3.363134  | 29 | 1  | 0 | 1.015879  | -3.638831 | -2.167263 |
| 32 | 8  | 0 | -5.245279 | -1.461907 | 1.971955  | 30 | 6  | 0 | 2.494486  | -2.515015 | -1.241218 |
| 33 | 7  | 0 | -3.085078 | -0.943701 | 0.325349  | 31 | 8  | 0 | 3.013197  | -1.253897 | -1.290123 |
| 34 | 1  | 0 | -2.761471 | -1.813406 | 0.742918  | 32 | 8  | 0 | 3.117556  | -3.454306 | -0.843059 |
| 35 | 1  | 0 | -3.923170 | -1.186437 | -0.201911 | 33 | 7  | 0 | 0.088382  | -2.484761 | -0.654312 |
| 36 | 16 | 0 | 0.393304  | 0.625749  | -2.059058 | 34 | 1  | 0 | -0.664276 | -3.161315 | -0.753545 |
| 37 | 6  | 0 | 0.365088  | 2.481979  | -1.973182 | 35 | 1  | 0 | 0.547096  | -2.669447 | 0.246877  |
| 38 | 1  | 0 | 0.891986  | 2.855569  | -2.849678 | 36 | 16 | 0 | -1.867851 | -1.431166 | 1.534094  |
| 39 | 1  | 0 | -0.669734 | 2.818266  | -2.025449 | 37 | 6  | 0 | -1.004374 | -0.853770 | 3.047583  |
| 40 | 6  | 0 | 1.054591  | 2.998187  | -0.700223 | 38 | 1  | 0 | -0.802790 | 0.218521  | 2.982956  |
| 41 | 1  | 0 | 2.134847  | 2.863369  | -0.811857 | 39 | 1  | 0 | -1.716902 | -1.009543 | 3.861001  |
| 42 | 7  | 0 | 0.625555  | 2.218401  | 0.479210  | 40 | 6  | 0 | 0.281686  | -1.611614 | 3.438000  |
| 43 | 1  | 0 | -0.399199 | 2.290947  | 0.585495  | 41 | 1  | 0 | 0.105891  | -2.680984 | 3.311213  |
| 44 | 6  | 0 | 0.820367  | 4.489254  | -0.470972 | 42 | 7  | 0 | 0.577583  | -1.350155 | 4.848903  |
| 45 | 8  | 0 | 0.458939  | 4.973906  | 0.568183  | 43 | 1  | 0 | 0.844538  | -0.378327 | 4.976089  |
| 46 | 8  | 0 | 1.105387  | 5.205615  | -1.579458 | 44 | 6  | 0 | 1.404850  | -1.225877 | 2.479911  |
| 47 | 1  | 0 | 6.699158  | 0.383700  | 1.620896  | 45 | 8  | 0 | 1.952450  | -0.061746 | 2.797294  |
| 48 | 1  | 0 | 0.953290  | 6.141560  | -1.376729 | 46 | 8  | 0 | 1.742490  | -1.894663 | 1.515987  |
| 49 | 1  | 0 | 1.053481  | 2.562559  | 1.337218  | 47 | 1  | 0 | -6.654540 | -1.603679 | -0.916844 |
| 50 | 1  | 0 | -5.466476 | -0.137733 | 3.865443  | 48 | 1  | 0 | 1.362161  | -1.913908 | 5.160917  |
| 51 | 1  | 0 | 3.477135  | -0.215454 | -1.157989 | 49 | 1  | 0 | 3.837590  | -1.210001 | -0.767880 |
| 52 | 17 | 0 | 1.320448  | -0.052532 | 2.520028  | 50 | 1  | 0 | -2.810266 | -0.079131 | -2.077670 |
|    |    |   |           |           |           | 51 | 1  | 0 | 2.611078  | 0.226281  | 2.113348  |
|    |    |   |           |           |           | 52 | 17 | 0 | 3.745179  | 1.055063  | 0.599725  |

HF=-2731.5623657\ZeroPoint=0.3632776\Thermal=0.3965724

G = -2.9 kcal mol<sup>-1</sup>

| Center Number | Atomic Number | Atomic Type | Coordinates (Angstroms) |           |           |
|---------------|---------------|-------------|-------------------------|-----------|-----------|
|               |               |             | X                       | Y         | Z         |
| 1             | 46            | 0           | -0.755315               | -0.578824 | -0.363210 |

HF=-2731.5510574\ZeroPoint=0.3622515\Thermal=0.3952735

G = 2.7 kcal mol<sup>-1</sup>

| Center Number | Atomic Number | Atomic Type | Coordinates (Angstroms) |           |           |
|---------------|---------------|-------------|-------------------------|-----------|-----------|
|               |               |             | X                       | Y         | Z         |
| 1             | 46            | 0           | -0.755315               | -0.578824 | -0.363210 |

| ----- |    |   |           |           |           | Center | Atomic | Atomic | Coordinates (Angstroms) |           |           |
|-------|----|---|-----------|-----------|-----------|--------|--------|--------|-------------------------|-----------|-----------|
|       |    |   |           |           |           | Number | Number | Type   | X                       | Y         | Z         |
| 1     | 46 | 0 | 1.182288  | -0.714384 | 0.335819  |        |        |        |                         |           |           |
| 2     | 46 | 0 | -1.077827 | 1.151948  | 0.723035  |        |        |        |                         |           |           |
| 3     | 7  | 0 | 2.102800  | 1.004172  | -0.422700 | 1      | 46     | 0      | -0.693986               | -0.194735 | 0.933359  |
| 4     | 7  | 0 | 3.212560  | 0.944805  | -1.000447 | 2      | 46     | 0      | 2.076503                | -0.678554 | 0.226933  |
| 5     | 6  | 0 | 3.993305  | -0.218375 | -0.907407 | 3      | 7      | 0      | -1.054437               | -1.569623 | -0.617940 |
| 6     | 6  | 0 | 4.250857  | -0.838860 | 0.323581  | 4      | 7      | 0      | -2.202901               | -1.770045 | -1.085178 |
| 7     | 6  | 0 | 5.094209  | -1.944466 | 0.366835  | 5      | 6      | 0      | -3.328259               | -1.241704 | -0.435963 |
| 8     | 1  | 0 | 5.312472  | -2.414531 | 1.319218  | 6      | 6      | 0      | -3.510043               | -1.330463 | 0.952207  |
| 9     | 6  | 0 | 5.666103  | -2.439031 | -0.804493 | 7      | 6      | 0      | -4.681538               | -0.841551 | 1.521331  |
| 10    | 6  | 0 | 5.424863  | -1.800120 | -2.022824 | 8      | 1      | 0      | -4.831694               | -0.924131 | 2.591906  |
| 11    | 1  | 0 | 5.873975  | -2.179566 | -2.933027 | 9      | 6      | 0      | -5.664100               | -0.259471 | 0.720905  |
| 12    | 6  | 0 | 4.614888  | -0.674148 | -2.074151 | 10     | 6      | 0      | -5.492524               | -0.204034 | -0.664159 |
| 13    | 1  | 0 | 4.414844  | -0.165886 | -3.008890 | 11     | 1      | 0      | -6.261224               | 0.234942  | -1.289246 |
| 14    | 6  | 0 | 1.522430  | 2.322991  | -0.345706 | 12     | 6      | 0      | -4.342414               | -0.719131 | -1.246505 |
| 15    | 6  | 0 | 0.202900  | 2.536838  | 0.105030  | 13     | 1      | 0      | -4.193788               | -0.691102 | -2.318874 |
| 16    | 6  | 0 | -0.247976 | 3.866738  | 0.183097  | 14     | 6      | 0      | -0.008438               | -2.355986 | -1.221307 |
| 17    | 1  | 0 | -1.264387 | 4.060681  | 0.502830  | 15     | 6      | 0      | 1.350100                | -2.108594 | -0.936537 |
| 18    | 6  | 0 | 0.565614  | 4.938706  | -0.150884 | 16     | 6      | 0      | 2.304503                | -2.941354 | -1.545286 |
| 19    | 1  | 0 | 0.181853  | 5.949968  | -0.069963 | 17     | 1      | 0      | 3.355492                | -2.754576 | -1.364988 |
| 20    | 6  | 0 | 1.874712  | 4.713356  | -0.590165 | 18     | 6      | 0      | 1.936479                | -3.979683 | -2.387319 |
| 21    | 1  | 0 | 2.521239  | 5.543752  | -0.848426 | 19     | 1      | 0      | 2.700730                | -4.604874 | -2.836346 |
| 22    | 6  | 0 | 2.346003  | 3.420503  | -0.682608 | 20     | 6      | 0      | 0.582881                | -4.220252 | -2.655004 |
| 23    | 1  | 0 | 3.358940  | 3.228917  | -1.007013 | 21     | 1      | 0      | 0.286711                | -5.035727 | -3.304452 |
| 24    | 16 | 0 | 0.573398  | 0.360505  | 2.341043  | 22     | 6      | 0      | -0.378602               | -3.417972 | -2.076809 |
| 25    | 6  | 0 | -0.237925 | -1.097598 | 3.150784  | 23     | 1      | 0      | -1.428217               | -3.597079 | -2.262266 |
| 26    | 1  | 0 | -1.073610 | -0.731989 | 3.748783  | 24     | 16     | 0      | 0.868624                | -1.644349 | 2.031817  |
| 27    | 1  | 0 | 0.498265  | -1.540865 | 3.825253  | 25     | 6      | 0      | 1.316243                | -0.489340 | 3.409061  |
| 28    | 6  | 0 | -0.721814 | -2.159779 | 2.171516  | 26     | 1      | 0      | 2.387040                | -0.583625 | 3.589759  |
| 29    | 1  | 0 | -0.967429 | -3.079468 | 2.717422  | 27     | 1      | 0      | 0.779091                | -0.835460 | 4.296313  |
| 30    | 6  | 0 | -1.994764 | -1.775271 | 1.412939  | 28     | 6      | 0      | 0.976371                | 0.961168  | 3.107702  |
| 31    | 8  | 0 | -2.492496 | -0.660770 | 1.432515  | 29     | 1      | 0      | 1.073563                | 1.559332  | 4.022398  |
| 32    | 8  | 0 | -2.476833 | -2.797903 | 0.747829  | 30     | 6      | 0      | 1.850043                | 1.657048  | 2.029438  |
| 33    | 7  | 0 | 0.337931  | -2.449194 | 1.160713  | 31     | 8      | 0      | 1.484709                | 2.824904  | 1.768155  |
| 34    | 1  | 0 | 1.103080  | -2.969092 | 1.586068  | 32     | 8      | 0      | 2.782695                | 1.018230  | 1.473586  |
| 35    | 1  | 0 | -0.014963 | -3.017391 | 0.388657  | 33     | 7      | 0      | -0.418556               | 1.075780  | 2.584221  |
| 36    | 16 | 0 | -2.458072 | 1.814425  | -1.061775 | 34     | 1      | 0      | -1.107296               | 0.850881  | 3.299120  |
| 37    | 6  | 0 | -3.081143 | 0.192025  | -1.659263 | 35     | 1      | 0      | -0.564296               | 2.041625  | 2.282847  |
| 38    | 1  | 0 | -2.938473 | 0.146268  | -2.742215 | 36     | 16     | 0      | -1.543868               | 1.637274  | -0.325689 |
| 39    | 1  | 0 | -2.476020 | -0.603686 | -1.224597 | 37     | 6      | 0      | -0.426827               | 1.609222  | -1.794819 |
| 40    | 6  | 0 | -4.589505 | -0.036928 | -1.330385 | 38     | 1      | 0      | 0.198600                | 0.716650  | -1.788017 |
| 41    | 1  | 0 | -5.188501 | 0.554921  | -2.024004 | 39     | 1      | 0      | -1.049111               | 1.573407  | -2.689944 |
| 42    | 7  | 0 | -5.038594 | 0.268445  | 0.025705  | 40     | 6      | 0      | 0.494925                | 2.827451  | -1.940353 |
| 43    | 1  | 0 | -4.944089 | 1.272108  | 0.157281  | 41     | 1      | 0      | 0.990531                | 2.743153  | -2.915327 |
| 44    | 6  | 0 | -4.895380 | -1.497471 | -1.578675 | 42     | 7      | 0      | 1.581248                | 2.872266  | -0.923916 |
| 45    | 8  | 0 | -5.675921 | -1.724980 | -2.636716 | 43     | 1      | 0      | 1.278222                | 2.865312  | 0.084956  |
| 46    | 8  | 0 | -4.459091 | -2.423553 | -0.908415 | 44     | 6      | 0      | -0.218970               | 4.172129  | -1.929324 |
| 47    | 1  | 0 | 6.313170  | -3.307779 | -0.767207 | 45     | 8      | 0      | -1.301406               | 4.160038  | -2.723547 |
| 48    | 1  | 0 | -4.395519 | -0.147580 | 0.693181  | 46     | 8      | 0      | 0.172352                | 5.140086  | -1.328523 |
| 49    | 1  | 0 | 3.832420  | -0.425711 | 1.232853  | 47     | 1      | 0      | -6.570380               | 0.128856  | 1.171048  |
| 50    | 1  | 0 | -5.791009 | -2.684677 | -2.728686 | 48     | 1      | 0      | 2.122478                | 3.732737  | -1.017556 |
| 51    | 1  | 0 | -3.267396 | -2.554593 | 0.171803  | 49     | 1      | 0      | -2.761977               | -1.820977 | 1.562509  |
| 52    | 17 | 0 | 1.298134  | -1.907954 | -1.705459 | 50     | 1      | 0      | -1.711108               | 5.037509  | -2.683237 |
|       |    |   |           |           |           | 51     | 17     | 0      | 3.134558                | 0.322577  | -1.687941 |
|       |    |   |           |           |           | 52     | 1      | 0      | 2.224001                | 2.054239  | -1.068311 |

HF=-2731.5407663\ZeroPoint=0.3624755\Thermal=0.3955295

HF=-2731.5657244\ZeroPoint=0.3631234\Thermal=0.395571

G = -11.4 kcal mol<sup>-1</sup>



G = -10.7 kcal mol<sup>-1</sup>

| Center<br>Number | Atomic<br>Number | Atomic<br>Type | Coordinates (Angstroms) |           |           |
|------------------|------------------|----------------|-------------------------|-----------|-----------|
|                  |                  |                | X                       | Y         | Z         |
| 1                | 46               | 0              | -1.051097               | -0.527865 | -0.600086 |
| 2                | 46               | 0              | 1.242117                | 1.269622  | -0.772886 |
| 3                | 7                | 0              | -1.813237               | 0.980224  | 0.642499  |
| 4                | 7                | 0              | -2.862713               | 0.799653  | 1.305133  |
| 5                | 6                | 0              | -3.692669               | -0.294303 | 1.004909  |
| 6                | 6                | 0              | -4.087199               | -0.586094 | -0.309246 |
| 7                | 6                | 0              | -4.964808               | -1.640698 | -0.540135 |
| 8                | 1                | 0              | -5.286631               | -1.857077 | -1.552563 |
| 9                | 6                | 0              | -5.438944               | -2.407511 | 0.523582  |
| 10               | 6                | 0              | -5.063259               | -2.094041 | 1.831557  |
| 11               | 1                | 0              | -5.437705               | -2.683624 | 2.660022  |
| 12               | 6                | 0              | -4.214984               | -1.022766 | 2.078149  |
| 13               | 1                | 0              | -3.913783               | -0.763828 | 3.085394  |
| 14               | 6                | 0              | -1.170545               | 2.255390  | 0.832457  |
| 15               | 6                | 0              | 0.105840                | 2.522727  | 0.288583  |
| 16               | 6                | 0              | 0.618940                | 3.819835  | 0.485687  |
| 17               | 1                | 0              | 1.598864                | 4.061627  | 0.092425  |
| 18               | 6                | 0              | -0.083806               | 4.797766  | 1.173339  |
| 19               | 1                | 0              | 0.347646                | 5.785743  | 1.293893  |
| 20               | 6                | 0              | -1.347475               | 4.511950  | 1.704045  |
| 21               | 1                | 0              | -1.907802               | 5.271994  | 2.235779  |
| 22               | 6                | 0              | -1.886037               | 3.254225  | 1.530584  |
| 23               | 1                | 0              | -2.868083               | 3.020062  | 1.916697  |
| 24               | 16               | 0              | -0.598770               | 1.002342  | -2.310285 |
| 25               | 6                | 0              | 0.117369                | -0.183573 | -3.538238 |

|    |    |   |           |           |           |
|----|----|---|-----------|-----------|-----------|
| 26 | 1  | 0 | 0.926874  | 0.332637  | -4.054877 |
| 27 | 1  | 0 | -0.671003 | -0.418484 | -4.258215 |
| 28 | 6  | 0 | 0.649294  | -1.444578 | -2.882675 |
| 29 | 1  | 0 | 0.860543  | -2.199096 | -3.649604 |
| 30 | 6  | 0 | 1.959643  | -1.298605 | -2.051197 |
| 31 | 8  | 0 | 2.469820  | -0.143228 | -1.910062 |
| 32 | 8  | 0 | 2.368500  | -2.363067 | -1.569412 |
| 33 | 7  | 0 | -0.364669 | -1.991176 | -1.925758 |
| 34 | 1  | 0 | -1.170673 | -2.378403 | -2.412937 |
| 35 | 1  | 0 | 0.070123  | -2.747282 | -1.392783 |
| 36 | 16 | 0 | 2.870101  | 1.505724  | 0.938136  |
| 37 | 6  | 0 | 3.823395  | -0.055147 | 0.867370  |
| 38 | 1  | 0 | 4.191593  | -0.236183 | -0.139623 |
| 39 | 1  | 0 | 4.670470  | 0.077374  | 1.544440  |
| 40 | 6  | 0 | 2.981631  | -1.313530 | 1.278058  |
| 41 | 1  | 0 | 2.613621  | -1.787850 | 0.365999  |
| 42 | 7  | 0 | 1.821885  | -0.943503 | 2.143094  |
| 43 | 1  | 0 | 2.012519  | -1.210417 | 3.113872  |
| 44 | 6  | 0 | 3.828195  | -2.302076 | 2.045207  |
| 45 | 8  | 0 | 4.802532  | -2.811629 | 1.284784  |
| 46 | 8  | 0 | 3.668496  | -2.572595 | 3.215231  |
| 47 | 1  | 0 | -6.114100 | -3.234607 | 0.337179  |
| 48 | 1  | 0 | 0.932273  | -1.389810 | 1.834787  |
| 49 | 1  | 0 | -3.746236 | 0.038369  | -1.125443 |
| 50 | 1  | 0 | 5.331006  | -3.412378 | 1.832000  |
| 51 | 17 | 0 | -0.944230 | -2.148812 | 1.181120  |
| 52 | 1  | 0 | 1.733094  | 0.105093  | 2.054313  |

HF=-2731.5640542\ZeroPoint=0.3631844\Thermal=0.3956817

## Structures from Table S9

**Table S9. PATH II:** B3LYP-D3/6-311+G\*\*/SDD(Pd)/gas phase free energies for the pre- (R) and postreaction (P) complexes and the transition states (TS) for the **second D-transfer**. Free energies relative to **B1-1** (in kcal mol<sup>-1</sup>). Donor group that is involved in the D-transfer is grey-shaded. Chloride that bonds to the Pd center is marked with “coord”.

| Mother complex→                                                                     |                                  |             |                 | B1-1                    |                      |                        | B1-2                   |                       |                         |
|-------------------------------------------------------------------------------------|----------------------------------|-------------|-----------------|-------------------------|----------------------|------------------------|------------------------|-----------------------|-------------------------|
| Functional/donor groups                                                             |                                  |             |                 |                         |                      |                        |                        |                       |                         |
| S/SD                                                                                | ND <sub>2</sub> /ND <sub>3</sub> | COO/COOD    | Cl <sup>-</sup> | R                       | TS                   | P                      | R                      | TS                    | P                       |
| D-source: coordinated Cys <sup>4D</sup>                                             |                                  |             |                 | I5-1                    |                      |                        | I5-4                   |                       |                         |
| S-coord                                                                             | ND <sub>3</sub>                  | COOD        | anion           | -19.0                   | 5.0                  | -7.8                   | -5.8                   | 5.2                   | -41.5                   |
| S-coord                                                                             | ND <sub>3</sub>                  | <b>COOD</b> | anion           | <b>-29.4</b><br>(-16.6) | <b>-2.0</b><br>(5.5) | <b>-6.6</b><br>(-7.2)  | -14.4<br>(-6.3)        | 4.9<br>(11.9)         | -14.6<br>(-10.7)        |
| SD-coord                                                                            | ND <sub>3</sub>                  | COO         | anion           | -13.5                   | 14.2                 | -0.6                   | -12.7                  | 7.8                   | -22.2                   |
| SD-coord                                                                            | ND <sub>2</sub>                  | <b>COOD</b> | anion           | -14.9                   | 16.9                 | -13.4*                 | -5.4                   | 14.8                  | -37.3*                  |
| SD                                                                                  | ND <sub>3</sub>                  | COO-coord   | anion           | -9.7                    | 11.4                 | 1.1                    | -3.0                   | 13.2                  | -23.8                   |
| SD                                                                                  | ND <sub>2</sub> -coord           | <b>COOD</b> | anion           | -14.2                   | 14.9                 | 2.5                    | -6.7                   | 11.7                  | 3.5                     |
| D-source: non-coordinated Cys <sup>4D</sup>                                         |                                  |             |                 | I5-2                    |                      |                        | I5-5                   |                       |                         |
| SD                                                                                  | ND <sub>3</sub>                  | COO         | coord           | -18.4                   | 4.2                  | -9.3                   | -6.1                   | 5.8                   | -34.1                   |
| SD                                                                                  | ND <sub>2</sub>                  | <b>COOD</b> | coord           | -17.5<br>(-5.1)         | 3.5<br>(14.3)        | -14.3<br>(-6.4)        | <b>-12.4</b><br>(-0.6) | <b>-2.1</b><br>(12.4) | <b>-38.6</b><br>(-15.3) |
| D-source: non-coordinated Cys <sup>5D+</sup> formed by an intermolecular D-transfer |                                  |             |                 | I5-3                    |                      |                        | I5-6                   |                       |                         |
| SD                                                                                  | ND <sub>3</sub>                  | COOD        | coord           | <b>-25.2</b><br>(-10.2) | <b>-3.0</b><br>(8.5) | <b>-11.8</b><br>(-2.6) | -12.2<br>(1.0)         | 2.8<br>(13.9)         | -34.8<br>(-14.1)        |
| D-source: coordinated Cys <sup>4D</sup>                                             |                                  |             |                 | I7-2                    |                      |                        | I8-2                   |                       |                         |
| S-coord                                                                             | ND <sub>3</sub>                  | COOD        | coord           | -1.9                    | 25.6                 | 12.7                   | -10.7                  | 16.3                  | 3.2                     |
| S-coord                                                                             | ND <sub>3</sub>                  | <b>COOD</b> | coord           | 6.4                     | 33.1                 | 9.2                    | -13.0                  | 20.2                  | 13.2                    |

\* Postreaction complex optimization leads to the D-transfer from SD to COO<sup>-</sup> group ending with three S-coordinated cysteines with the ND<sub>2</sub> and COOD groups.

|                                  |        |        |                               |    |    |   |           |           |           |
|----------------------------------|--------|--------|-------------------------------|----|----|---|-----------|-----------|-----------|
| G = -19.0 kcal mol <sup>-1</sup> |        |        |                               | 14 | 6  | 0 | -1.633890 | 2.692882  | -0.598656 |
| -----                            |        |        |                               | 15 | 6  | 0 | -0.276149 | 2.669099  | -0.987858 |
| Center                           | Atomic | Atomic | Coordinates (Angstroms)       | 16 | 6  | 0 | 0.265520  | 3.919798  | -1.368626 |
| Number                           | Number | Type   | X Y Z                         | 17 | 1  | 0 | 1.298627  | 3.965528  | -1.687184 |
| -----                            |        |        |                               | 18 | 6  | 0 | -0.461842 | 5.099822  | -1.331133 |
| 1                                | 46     | 0      | -1.343479 -0.358432 -0.101040 | 19 | 1  | 0 | 0.008627  | 6.030176  | -1.631693 |
| 2                                | 46     | 0      | 1.066370 1.136704 -1.131157   | 20 | 6  | 0 | -1.791208 | 5.093139  | -0.891595 |
| 3                                | 7      | 0      | -2.322742 1.466012 -0.306250  | 21 | 1  | 0 | -2.361839 | 6.012997  | -0.836876 |
| 4                                | 7      | 0      | -3.563869 1.555534 -0.157062  | 22 | 6  | 0 | -2.373868 | 3.895343  | -0.537038 |
| 5                                | 6      | 0      | -4.312711 0.367440 -0.009913  | 23 | 1  | 0 | -3.405736 | 3.858080  | -0.217197 |
| 6                                | 6      | 0      | -5.199055 0.281979 1.066502   | 24 | 16 | 0 | 2.476216  | 2.304349  | 0.359948  |
| 7                                | 6      | 0      | -5.969889 -0.863763 1.229956  | 25 | 6  | 0 | 3.863030  | 1.086095  | 0.443809  |
| 8                                | 1      | 0      | -6.628805 -0.948275 2.086100  | 26 | 1  | 0 | 3.655245  | 0.331826  | 1.201592  |
| 9                                | 6      | 0      | -5.901577 -1.897255 0.294805  | 27 | 1  | 0 | 4.767570  | 1.625512  | 0.719693  |
| 10                               | 6      | 0      | -5.059108 -1.780757 -0.810538 | 28 | 6  | 0 | 4.025521  | 0.429766  | -0.921480 |
| 11                               | 1      | 0      | -5.029376 -2.566738 -1.556779 | 29 | 1  | 0 | 4.257620  | 1.207525  | -1.658600 |
| 12                               | 6      | 0      | -4.255299 -0.655853 -0.966733 | 30 | 6  | 0 | 5.158601  | -0.590559 | -1.027314 |
| 13                               | 1      | 0      | -3.618570 -0.544391 -1.834796 | 31 | 8  | 0 | 6.219842  | -0.272822 | -0.258002 |

|    |    |   |           |           |           |    |    |   |           |           |           |
|----|----|---|-----------|-----------|-----------|----|----|---|-----------|-----------|-----------|
| 32 | 8  | 0 | 5.136507  | -1.543877 | -1.764850 | 16 | 6  | 0 | -0.195734 | -3.391091 | -1.804125 |
| 33 | 7  | 0 | 2.747470  | -0.207274 | -1.312656 | 17 | 1  | 0 | -1.183603 | -3.712172 | -1.498096 |
| 34 | 1  | 0 | 2.860565  | -0.629001 | -2.231148 | 18 | 6  | 0 | 0.457453  | -4.091959 | -2.814960 |
| 35 | 1  | 0 | 2.582174  | -0.977780 | -0.638183 | 19 | 1  | 0 | -0.035861 | -4.928784 | -3.296641 |
| 36 | 16 | 0 | -0.519470 | -0.265637 | -2.341505 | 20 | 6  | 0 | 1.738680  | -3.711233 | -3.212885 |
| 37 | 6  | 0 | 0.169697  | -1.993500 | -2.384126 | 21 | 1  | 0 | 2.244225  | -4.238595 | -4.013686 |
| 38 | 1  | 0 | 0.052902  | -2.372027 | -3.397973 | 22 | 6  | 0 | 2.378116  | -2.657971 | -2.570046 |
| 39 | 1  | 0 | 1.229397  | -1.993399 | -2.141989 | 23 | 1  | 0 | 3.382932  | -2.366358 | -2.845356 |
| 40 | 6  | 0 | -0.577863 | -2.885068 | -1.396754 | 24 | 16 | 0 | -2.515890 | -2.270240 | 0.354041  |
| 41 | 1  | 0 | -1.626066 | -2.956341 | -1.707979 | 25 | 6  | 0 | -3.927734 | -1.138493 | 0.697413  |
| 42 | 7  | 0 | -0.551078 | -2.276026 | -0.046051 | 26 | 1  | 0 | -3.676976 | -0.454659 | 1.509985  |
| 43 | 1  | 0 | 0.433246  | -2.250298 | 0.304410  | 27 | 1  | 0 | -4.789432 | -1.742272 | 0.980544  |
| 44 | 6  | 0 | -0.079456 | -4.330998 | -1.310329 | 28 | 6  | 0 | -4.212952 | -0.352900 | -0.572045 |
| 45 | 8  | 0 | 0.557304  | -4.731593 | -2.428119 | 29 | 1  | 0 | -4.467785 | -1.056135 | -1.372559 |
| 46 | 8  | 0 | -0.283338 | -5.041012 | -0.361071 | 30 | 6  | 0 | -5.362340 | 0.652574  | -0.509579 |
| 47 | 1  | 0 | -6.514454 | -2.782403 | 0.419094  | 31 | 8  | 0 | -6.320990 | 0.295299  | 0.365997  |
| 48 | 1  | 0 | -1.067069 | -2.864457 | 0.606309  | 32 | 8  | 0 | -5.429351 | 1.628123  | -1.214139 |
| 49 | 1  | 0 | 6.896921  | -0.951462 | -0.402985 | 33 | 7  | 0 | -2.973341 | 0.366161  | -0.961520 |
| 50 | 1  | 0 | -5.243694 | 1.094812  | 1.780660  | 34 | 1  | 0 | -3.123153 | 0.845295  | -1.846292 |
| 51 | 7  | 0 | 0.435925  | 1.463312  | 2.601976  | 35 | 1  | 0 | -2.809105 | 1.092683  | -0.224562 |
| 52 | 6  | 0 | 0.450849  | 0.320841  | 3.566127  | 36 | 16 | 0 | 0.074681  | 0.946776  | -2.128427 |
| 53 | 6  | 0 | -0.309416 | -0.898945 | 3.003048  | 37 | 6  | 0 | -0.691398 | 2.590142  | -1.703171 |
| 54 | 1  | 0 | -0.056115 | 0.662675  | 4.472498  | 38 | 1  | 0 | -0.706806 | 3.187401  | -2.613414 |
| 55 | 6  | 0 | 1.899517  | 0.003163  | 3.916908  | 39 | 1  | 0 | -1.715104 | 2.465773  | -1.362326 |
| 56 | 16 | 0 | -1.912905 | -0.451185 | 2.220836  | 40 | 6  | 0 | 0.111857  | 3.305368  | -0.619362 |
| 57 | 1  | 0 | -0.503965 | -1.570366 | 3.838788  | 41 | 1  | 0 | 1.085421  | 3.595036  | -1.028872 |
| 58 | 1  | 0 | 0.343736  | -1.424010 | 2.308748  | 42 | 7  | 0 | 0.358641  | 2.393503  | 0.524799  |
| 59 | 8  | 0 | 2.839406  | 0.674498  | 3.579812  | 43 | 1  | 0 | -0.567049 | 2.172722  | 0.960116  |
| 60 | 8  | 0 | 1.971820  | -1.099979 | 4.672281  | 44 | 6  | 0 | -0.513659 | 4.602988  | -0.093782 |
| 61 | 1  | 0 | 1.202805  | 1.469329  | 1.859398  | 45 | 8  | 0 | -1.457832 | 5.100324  | -0.911779 |
| 62 | 1  | 0 | 0.831997  | -5.652838 | -2.298103 | 46 | 8  | 0 | -0.143634 | 5.137462  | 0.918735  |
| 63 | 1  | 0 | -0.483594 | 1.427602  | 2.123478  | 47 | 1  | 0 | 6.840799  | 2.491455  | 1.397260  |
| 64 | 1  | 0 | 0.540473  | 2.361422  | 3.071516  | 48 | 1  | 0 | 0.897208  | 2.871550  | 1.246024  |
| 65 | 1  | 0 | 2.906802  | -1.334960 | 4.775914  | 49 | 1  | 0 | -7.012450 | 0.974535  | 0.336067  |
| 66 | 17 | 0 | 2.363261  | -2.182255 | 1.098318  | 50 | 1  | 0 | 5.702809  | -1.589386 | 0.660464  |

HF=-3453.6831581\ZeroPoint=0.463263\Thermal=0.5058469

G = 5.0 kcal mol<sup>-1</sup>

| Center Number | Atomic Number | Atomic Type | Coordinates (Angstroms) |           |           |
|---------------|---------------|-------------|-------------------------|-----------|-----------|
|               |               |             | X                       | Y         | Z         |
| 1             | 46            | 0           | 1.331733                | 0.682917  | -0.104065 |
| 2             | 46            | 0           | -1.233763               | -0.794326 | -0.930126 |
| 3             | 7             | 0           | 2.405950                | -0.922442 | -0.849596 |
| 4             | 7             | 0           | 3.652180                | -1.088430 | -0.782695 |
| 5             | 6             | 0           | 4.454374                | -0.084400 | -0.224994 |
| 6             | 6             | 0           | 5.550928                | -0.524827 | 0.530690  |
| 7             | 6             | 0           | 6.389142                | 0.402188  | 1.132835  |
| 8             | 1             | 0           | 7.213673                | 0.063285  | 1.748585  |
| 9             | 6             | 0           | 6.176449                | 1.769474  | 0.936879  |
| 10            | 6             | 0           | 5.127450                | 2.206302  | 0.129181  |
| 11            | 1             | 0           | 4.985504                | 3.265299  | -0.051736 |
| 12            | 6             | 0           | 4.260366                | 1.287807  | -0.452325 |
| 13            | 1             | 0           | 3.472538                | 1.617060  | -1.117963 |
| 14            | 6             | 0           | 1.710767                | -1.960591 | -1.560563 |
| 15            | 6             | 0           | 0.381977                | -2.265395 | -1.176337 |

|    |    |   |           |           |           |
|----|----|---|-----------|-----------|-----------|
| 16 | 6  | 0 | -0.195734 | -3.391091 | -1.804125 |
| 17 | 1  | 0 | -1.183603 | -3.712172 | -1.498096 |
| 18 | 6  | 0 | 0.457453  | -4.091959 | -2.814960 |
| 19 | 1  | 0 | -0.035861 | -4.928784 | -3.296641 |
| 20 | 6  | 0 | 1.738680  | -3.711233 | -3.212885 |
| 21 | 1  | 0 | 2.244225  | -4.238595 | -4.013686 |
| 22 | 6  | 0 | 2.378116  | -2.657971 | -2.570046 |
| 23 | 1  | 0 | 3.382932  | -2.366358 | -2.845356 |
| 24 | 16 | 0 | -2.515890 | -2.270240 | 0.354041  |
| 25 | 6  | 0 | -3.927734 | -1.138493 | 0.697413  |
| 26 | 1  | 0 | -3.676976 | -0.454659 | 1.509985  |
| 27 | 1  | 0 | -4.789432 | -1.742272 | 0.980544  |
| 28 | 6  | 0 | -4.212952 | -0.352900 | -0.572045 |
| 29 | 1  | 0 | -4.467785 | -1.056135 | -1.372559 |
| 30 | 6  | 0 | -5.362340 | 0.652574  | -0.509579 |
| 31 | 8  | 0 | -6.320990 | 0.295299  | 0.365997  |
| 32 | 8  | 0 | -5.429351 | 1.628123  | -1.214139 |
| 33 | 7  | 0 | -2.973341 | 0.366161  | -0.961520 |
| 34 | 1  | 0 | -3.123153 | 0.845295  | -1.846292 |
| 35 | 1  | 0 | -2.809105 | 1.092683  | -0.224562 |
| 36 | 16 | 0 | 0.074681  | 0.946776  | -2.128427 |
| 37 | 6  | 0 | -0.691398 | 2.590142  | -1.703171 |
| 38 | 1  | 0 | -0.706806 | 3.187401  | -2.613414 |
| 39 | 1  | 0 | -1.715104 | 2.465773  | -1.362326 |
| 40 | 6  | 0 | 0.111857  | 3.305368  | -0.619362 |
| 41 | 1  | 0 | 1.085421  | 3.595036  | -1.028872 |
| 42 | 7  | 0 | 0.358641  | 2.393503  | 0.524799  |
| 43 | 1  | 0 | -0.567049 | 2.172722  | 0.960116  |
| 44 | 6  | 0 | -0.513659 | 4.602988  | -0.093782 |
| 45 | 8  | 0 | -1.457832 | 5.100324  | -0.911779 |
| 46 | 8  | 0 | -0.143634 | 5.137462  | 0.918735  |
| 47 | 1  | 0 | 6.840799  | 2.491455  | 1.397260  |
| 48 | 1  | 0 | 0.897208  | 2.871550  | 1.246024  |
| 49 | 1  | 0 | -7.012450 | 0.974535  | 0.336067  |
| 50 | 1  | 0 | 5.702809  | -1.589386 | 0.660464  |
| 51 | 7  | 0 | 0.791896  | -2.570616 | 1.456118  |
| 52 | 6  | 0 | 0.365749  | -1.967631 | 2.743604  |
| 53 | 6  | 0 | 0.308296  | -0.442380 | 2.688095  |
| 54 | 1  | 0 | 1.111789  | -2.242279 | 3.503799  |
| 55 | 6  | 0 | -0.895415 | -2.692719 | 3.205823  |
| 56 | 16 | 0 | 1.936924  | 0.268489  | 2.148685  |
| 57 | 1  | 0 | 0.095893  | -0.064096 | 3.687910  |
| 58 | 1  | 0 | -0.501354 | -0.104155 | 2.041167  |
| 59 | 8  | 0 | -1.058687 | -3.878527 | 3.048545  |
| 60 | 8  | 0 | -1.727687 | -1.903060 | 3.898484  |
| 61 | 1  | 0 | 0.295718  | -2.185908 | 0.194798  |
| 62 | 1  | 0 | -1.822345 | 5.895888  | -0.493742 |
| 63 | 1  | 0 | 1.787787  | -2.389155 | 1.341934  |
| 64 | 1  | 0 | 0.636778  | -3.578214 | 1.493159  |
| 65 | 1  | 0 | -2.481127 | -2.443331 | 4.181273  |
| 66 | 17 | 0 | -2.559710 | 2.180367  | 1.471036  |

HF=-3453.6424971\ZeroPoint=0.4592814\Thermal=0.5012975

G = -7.8 kcal mol<sup>-1</sup>

| Center Number | Atomic Number | Atomic Type | Coordinates (Angstroms) |   |   |
|---------------|---------------|-------------|-------------------------|---|---|
|               |               |             | X                       | Y | Z |

|    |    |   |           |           |           |
|----|----|---|-----------|-----------|-----------|
| 1  | 46 | 0 | 1.304589  | 0.728164  | -0.092010 |
| 2  | 46 | 0 | -1.397749 | -0.821384 | -1.065955 |
| 3  | 7  | 0 | 2.413568  | -0.739884 | -1.044385 |
| 4  | 7  | 0 | 3.646601  | -0.921830 | -1.166419 |
| 5  | 6  | 0 | 4.541255  | -0.050242 | -0.523254 |
| 6  | 6  | 0 | 5.718874  | -0.640876 | -0.043387 |
| 7  | 6  | 0 | 6.652921  | 0.136134  | 0.627088  |
| 8  | 1  | 0 | 7.546252  | -0.324018 | 1.032153  |
| 9  | 6  | 0 | 6.446622  | 1.510621  | 0.767912  |
| 10 | 6  | 0 | 5.307589  | 2.108261  | 0.228594  |
| 11 | 1  | 0 | 5.164736  | 3.179173  | 0.311127  |
| 12 | 6  | 0 | 4.350400  | 1.335459  | -0.417111 |
| 13 | 1  | 0 | 3.476609  | 1.794660  | -0.862593 |
| 14 | 6  | 0 | 1.604239  | -1.591749 | -1.872059 |
| 15 | 6  | 0 | 0.546918  | -2.306864 | -1.266487 |
| 16 | 6  | 0 | -0.297356 | -3.057811 | -2.101568 |
| 17 | 1  | 0 | -1.049229 | -3.699711 | -1.662547 |
| 18 | 6  | 0 | -0.119366 | -3.048780 | -3.494954 |
| 19 | 1  | 0 | -0.794430 | -3.614951 | -4.124940 |
| 20 | 6  | 0 | 0.929296  | -2.336276 | -4.053334 |
| 21 | 1  | 0 | 1.074055  | -2.331731 | -5.127450 |
| 22 | 6  | 0 | 1.807268  | -1.606624 | -3.239888 |
| 23 | 1  | 0 | 2.616711  | -1.029318 | -3.667784 |
| 24 | 16 | 0 | -2.496206 | -2.426611 | 0.230114  |
| 25 | 6  | 0 | -3.914824 | -1.385065 | 0.781892  |
| 26 | 1  | 0 | -3.623432 | -0.763442 | 1.629552  |
| 27 | 1  | 0 | -4.730142 | -2.045831 | 1.074552  |
| 28 | 6  | 0 | -4.323975 | -0.509147 | -0.388294 |
| 29 | 1  | 0 | -4.627194 | -1.148165 | -1.224397 |
| 30 | 6  | 0 | -5.479796 | 0.464100  | -0.154644 |
| 31 | 8  | 0 | -6.336016 | 0.040405  | 0.791204  |
| 32 | 8  | 0 | -5.631601 | 1.471442  | -0.799001 |
| 33 | 7  | 0 | -3.133418 | 0.278249  | -0.811936 |
| 34 | 1  | 0 | -3.365878 | 0.833292  | -1.632988 |
| 35 | 1  | 0 | -2.923943 | 0.940946  | -0.021501 |
| 36 | 16 | 0 | -0.128472 | 1.081803  | -2.026765 |
| 37 | 6  | 0 | -0.933098 | 2.646686  | -1.421694 |
| 38 | 1  | 0 | -1.011158 | 3.323453  | -2.270931 |
| 39 | 1  | 0 | -1.934598 | 2.451000  | -1.050330 |
| 40 | 6  | 0 | -0.108530 | 3.293770  | -0.309867 |
| 41 | 1  | 0 | 0.829761  | 3.668395  | -0.732705 |
| 42 | 7  | 0 | 0.236015  | 2.293593  | 0.730099  |
| 43 | 1  | 0 | -0.657113 | 1.974736  | 1.168420  |
| 44 | 6  | 0 | -0.766076 | 4.505585  | 0.361560  |
| 45 | 8  | 0 | -1.748052 | 5.046224  | -0.381277 |
| 46 | 8  | 0 | -0.385978 | 4.951262  | 1.412195  |
| 47 | 1  | 0 | 7.183370  | 2.117963  | 1.280730  |
| 48 | 1  | 0 | 0.771184  | 2.732557  | 1.478816  |
| 49 | 1  | 0 | -7.035954 | 0.706472  | 0.874939  |
| 50 | 1  | 0 | 5.862036  | -1.706342 | -0.176406 |
| 51 | 7  | 0 | 1.601728  | -2.770589 | 1.718891  |
| 52 | 6  | 0 | 1.046789  | -2.152721 | 2.922123  |
| 53 | 6  | 0 | 0.716000  | -0.668450 | 2.698717  |
| 54 | 1  | 0 | 1.737943  | -2.210694 | 3.781499  |
| 55 | 6  | 0 | -0.165403 | -2.968529 | 3.357817  |
| 56 | 16 | 0 | 2.178751  | 0.282196  | 2.058280  |
| 57 | 1  | 0 | 0.402350  | -0.215419 | 3.638160  |

|    |    |   |           |           |           |
|----|----|---|-----------|-----------|-----------|
| 58 | 1  | 0 | -0.116201 | -0.577521 | 1.998934  |
| 59 | 8  | 0 | -0.355274 | -4.121234 | 3.057855  |
| 60 | 8  | 0 | -0.983518 | -2.277010 | 4.178537  |
| 61 | 1  | 0 | 0.561256  | -2.434664 | -0.181823 |
| 62 | 1  | 0 | -2.130364 | 5.780559  | 0.123753  |
| 63 | 1  | 0 | 2.522429  | -2.380493 | 1.545065  |
| 64 | 1  | 0 | 1.678588  | -3.774757 | 1.845382  |
| 65 | 1  | 0 | -1.715365 | -2.864129 | 4.420209  |
| 66 | 17 | 0 | -2.675207 | 1.939855  | 1.694037  |

HF=-3453.6620708\ZeroPoint=0.4620679\Thermal=0.505109

G = -29.4 kcal mol<sup>-1</sup>

| Center Number | Atomic Number | Atomic Type | Coordinates (Angstroms) |           |           |
|---------------|---------------|-------------|-------------------------|-----------|-----------|
|               |               |             | X                       | Y         | Z         |
| 1             | 46            | 0           | 1.298311                | 0.553945  | -0.024240 |
| 2             | 46            | 0           | -1.403341               | -0.681144 | -1.039034 |
| 3             | 7             | 0           | 2.120956                | -1.150625 | -0.853761 |
| 4             | 7             | 0           | 3.359297                | -1.255628 | -1.011921 |
| 5             | 6             | 0           | 4.170551                | -0.128248 | -0.755075 |
| 6             | 6             | 0           | 5.259109                | -0.288519 | 0.106147  |
| 7             | 6             | 0           | 6.094506                | 0.793300  | 0.362344  |
| 8             | 1             | 0           | 6.916554                | 0.680977  | 1.059348  |
| 9             | 6             | 0           | 5.882490                | 2.014406  | -0.279303 |
| 10            | 6             | 0           | 4.829559                | 2.151210  | -1.183403 |
| 11            | 1             | 0           | 4.683880                | 3.087152  | -1.711058 |
| 12            | 6             | 0           | 3.963800                | 1.087770  | -1.421469 |
| 13            | 1             | 0           | 3.161711                | 1.175873  | -2.142727 |
| 14            | 6             | 0           | 1.337699                | -2.290112 | -1.247605 |
| 15            | 6             | 0           | -0.063826               | -2.189879 | -1.414510 |
| 16            | 6             | 0           | -0.682001               | -3.334276 | -1.969705 |
| 17            | 1             | 0           | -1.746815               | -3.315996 | -2.157241 |
| 18            | 6             | 0           | 0.006384                | -4.503027 | -2.260526 |
| 19            | 1             | 0           | -0.530765               | -5.352207 | -2.669440 |
| 20            | 6             | 0           | 1.377146                | -4.594338 | -2.000635 |
| 21            | 1             | 0           | 1.918384                | -5.515095 | -2.183308 |
| 22            | 6             | 0           | 2.036963                | -3.489005 | -1.510468 |
| 23            | 1             | 0           | 3.100353                | -3.523405 | -1.321908 |
| 24            | 16            | 0           | -2.804554               | -2.216712 | 0.135986  |
| 25            | 6             | 0           | -4.223848               | -1.087446 | 0.496364  |
| 26            | 1             | 0           | -4.070979               | -0.561154 | 1.442133  |
| 27            | 1             | 0           | -5.128377               | -1.688770 | 0.570902  |
| 28            | 6             | 0           | -4.359465               | -0.062227 | -0.624862 |
| 29            | 1             | 0           | -4.558097               | -0.596439 | -1.560775 |
| 30            | 6             | 0           | -5.510550               | 0.925400  | -0.443975 |
| 31            | 8             | 0           | -6.644089               | 0.314922  | -0.041001 |
| 32            | 8             | 0           | -5.437028               | 2.105240  | -0.677778 |
| 33            | 7             | 0           | -3.082760               | 0.664836  | -0.767019 |
| 34            | 1             | 0           | -3.182875               | 1.368778  | -1.493371 |
| 35            | 1             | 0           | -2.893815               | 1.159601  | 0.118878  |
| 36            | 16            | 0           | 0.051039                | 1.010740  | -1.999892 |
| 37            | 6             | 0           | -0.584747               | 2.675938  | -1.459892 |
| 38            | 1             | 0           | -0.642830               | 3.312190  | -2.340780 |
| 39            | 1             | 0           | -1.581136               | 2.590009  | -1.033285 |
| 40            | 6             | 0           | 0.349066                | 3.295975  | -0.420207 |
| 41            | 1             | 0           | 1.325662                | 3.472695  | -0.884385 |

|    |    |   |           |           |           |    |    |   |           |           |           |
|----|----|---|-----------|-----------|-----------|----|----|---|-----------|-----------|-----------|
| 42 | 7  | 0 | 0.545976  | 2.351868  | 0.701907  | 26 | 1  | 0 | -4.158977 | -0.340852 | 1.732735  |
| 43 | 1  | 0 | -0.357468 | 2.170259  | 1.179243  | 27 | 1  | 0 | -5.085273 | -1.775635 | 1.242227  |
| 44 | 6  | 0 | -0.109262 | 4.655362  | 0.111756  | 28 | 6  | 0 | -4.410102 | -0.531082 | -0.390012 |
| 45 | 8  | 0 | -0.669588 | 5.413616  | -0.852866 | 29 | 1  | 0 | -4.540142 | -1.338540 | -1.118356 |
| 46 | 8  | 0 | 0.057866  | 5.022123  | 1.244179  | 30 | 6  | 0 | -5.619131 | 0.389539  | -0.541097 |
| 47 | 1  | 0 | 6.545703  | 2.849839  | -0.087758 | 31 | 8  | 0 | -6.724761 | -0.135574 | 0.021833  |
| 48 | 1  | 0 | 1.162501  | 2.759220  | 1.403203  | 32 | 8  | 0 | -5.600540 | 1.439066  | -1.132135 |
| 49 | 1  | 0 | -7.337221 | 0.990114  | 0.021284  | 33 | 7  | 0 | -3.175634 | 0.210935  | -0.729140 |
| 50 | 1  | 0 | 5.414533  | -1.244267 | 0.590987  | 34 | 1  | 0 | -3.286532 | 0.664282  | -1.632620 |
| 51 | 7  | 0 | -1.442877 | -1.334170 | 2.827166  | 35 | 1  | 0 | -3.026223 | 0.951789  | -0.018395 |
| 52 | 6  | 0 | -0.005547 | -1.359627 | 2.433374  | 36 | 16 | 0 | -0.182685 | 0.533586  | -2.075491 |
| 53 | 6  | 0 | 0.806975  | -0.216239 | 3.063529  | 37 | 6  | 0 | -0.885839 | 2.241950  | -1.836570 |
| 54 | 1  | 0 | -0.016890 | -1.221066 | 1.348480  | 38 | 1  | 0 | -1.070570 | 2.666573  | -2.821338 |
| 55 | 6  | 0 | 0.561343  | -2.746373 | 2.741107  | 39 | 1  | 0 | -1.828581 | 2.201985  | -1.296810 |
| 56 | 16 | 0 | 2.339011  | 0.106364  | 2.083857  | 40 | 6  | 0 | 0.084814  | 3.127388  | -1.054175 |
| 57 | 1  | 0 | 1.112660  | -0.460886 | 4.084502  | 41 | 1  | 0 | 0.988022  | 3.281581  | -1.654546 |
| 58 | 1  | 0 | 0.192351  | 0.682542  | 3.096563  | 42 | 7  | 0 | 0.481749  | 2.450361  | 0.200303  |
| 59 | 8  | 0 | -0.099164 | -3.596695 | 3.285843  | 43 | 1  | 0 | -0.367172 | 2.310486  | 0.779615  |
| 60 | 8  | 0 | 1.826283  | -2.937552 | 2.373574  | 44 | 6  | 0 | -0.445393 | 4.528965  | -0.738463 |
| 61 | 17 | 0 | -2.209977 | 1.591056  | 2.174946  | 45 | 8  | 0 | -1.274391 | 4.990208  | -1.695676 |
| 62 | 1  | 0 | 2.231149  | -2.080269 | 2.078369  | 46 | 8  | 0 | -0.113715 | 5.161798  | 0.228355  |
| 63 | 1  | 0 | -0.909522 | 6.266866  | -0.458734 | 47 | 1  | 0 | 7.223175  | 2.084692  | 0.424812  |
| 64 | 1  | 0 | -1.791832 | -0.341873 | 2.802480  | 48 | 1  | 0 | 1.112365  | 3.039456  | 0.742286  |
| 65 | 1  | 0 | -1.980799 | -1.845030 | 2.070985  | 49 | 1  | 0 | -7.459412 | 0.477791  | -0.135147 |
| 66 | 1  | 0 | -1.599412 | -1.790176 | 3.726594  | 50 | 1  | 0 | 5.589430  | -1.890837 | 0.598504  |

HF=-3453.7023056\ZeroPoint=0.4638943\Thermal=0.505815

G = -2.0 kcal mol<sup>-1</sup>

| Center Number | Atomic Number | Atomic Type | Coordinates (Angstroms) |           |           |
|---------------|---------------|-------------|-------------------------|-----------|-----------|
|               |               |             | X                       | Y         | Z         |
| 1             | 46            | 0           | 1.373451                | 0.625560  | -0.229490 |
| 2             | 46            | 0           | -1.437733               | -0.961761 | -0.591503 |
| 3             | 7             | 0           | 2.279495                | -1.152883 | -0.789807 |
| 4             | 7             | 0           | 3.501371                | -1.426722 | -0.814954 |
| 5             | 6             | 0           | 4.446716                | -0.440578 | -0.494554 |
| 6             | 6             | 0           | 5.548083                | -0.862154 | 0.262852  |
| 7             | 6             | 0           | 6.527733                | 0.055024  | 0.613503  |
| 8             | 1             | 0           | 7.358724                | -0.256875 | 1.234762  |
| 9             | 6             | 0           | 6.447777                | 1.374946  | 0.160825  |
| 10            | 6             | 0           | 5.384727                | 1.775743  | -0.646531 |
| 11            | 1             | 0           | 5.340129                | 2.791159  | -1.022581 |
| 12            | 6             | 0           | 4.376359                | 0.875818  | -0.974064 |
| 13            | 1             | 0           | 3.563394                | 1.168281  | -1.626963 |
| 14            | 6             | 0           | 1.442769                | -2.205778 | -1.309360 |
| 15            | 6             | 0           | 0.201670                | -2.473052 | -0.678716 |
| 16            | 6             | 0           | -0.495087               | -3.606277 | -1.156124 |
| 17            | 1             | 0           | -1.397738               | -3.916151 | -0.645834 |
| 18            | 6             | 0           | -0.053577               | -4.343448 | -2.253322 |
| 19            | 1             | 0           | -0.634223               | -5.186878 | -2.609190 |
| 20            | 6             | 0           | 1.137987                | -3.997548 | -2.883933 |
| 21            | 1             | 0           | 1.485715                | -4.557685 | -3.744545 |
| 22            | 6             | 0           | 1.905789                | -2.942186 | -2.394681 |
| 23            | 1             | 0           | 2.854576                | -2.689625 | -2.849730 |
| 24            | 16            | 0           | -2.705678               | -2.180236 | 1.005849  |
| 25            | 6             | 0           | -4.235071               | -1.142577 | 0.993771  |

|    |    |   |           |           |           |
|----|----|---|-----------|-----------|-----------|
| 51 | 7  | 0 | -1.288032 | -0.340246 | 3.300284  |
| 52 | 6  | 0 | 0.013451  | -0.474386 | 2.554441  |
| 53 | 6  | 0 | 0.987621  | 0.623796  | 2.966651  |
| 54 | 1  | 0 | -0.260890 | -0.350746 | 1.507443  |
| 55 | 6  | 0 | 0.517064  | -1.907871 | 2.849568  |
| 56 | 16 | 0 | 2.468018  | 0.694714  | 1.868759  |
| 57 | 1  | 0 | 1.362178  | 0.428186  | 3.974938  |
| 58 | 1  | 0 | 0.469704  | 1.587074  | 2.967460  |
| 59 | 8  | 0 | 0.594570  | -2.204618 | 4.040997  |
| 60 | 8  | 0 | 0.769262  | -2.655496 | 1.845695  |
| 61 | 17 | 0 | -2.329601 | 2.086016  | 1.680880  |
| 62 | 1  | 0 | 0.316617  | -2.354504 | 0.591321  |
| 63 | 1  | 0 | -1.554824 | 5.883138  | -1.440697 |
| 64 | 1  | 0 | -1.703668 | 0.596895  | 3.113937  |
| 65 | 1  | 0 | -1.931084 | -1.043454 | 2.881799  |
| 66 | 1  | 0 | -1.139194 | -0.548218 | 4.290310  |

HF=-3453.6562362\ZeroPoint=0.4602284\Thermal=0.5018406

G = -6.6 kcal mol<sup>-1</sup>

| Center Number | Atomic Number | Atomic Type | Coordinates (Angstroms) |           |           |
|---------------|---------------|-------------|-------------------------|-----------|-----------|
|               |               |             | X                       | Y         | Z         |
| 1             | 46            | 0           | 1.374980                | 0.679109  | -0.275273 |
| 2             | 46            | 0           | -1.524074               | -1.054529 | -0.683115 |
| 3             | 7             | 0           | 2.326186                | -1.062274 | -0.896791 |
| 4             | 7             | 0           | 3.523207                | -1.402188 | -0.968648 |
| 5             | 6             | 0           | 4.524426                | -0.504752 | -0.555944 |
| 6             | 6             | 0           | 5.593073                | -1.061367 | 0.157600  |
| 7             | 6             | 0           | 6.616918                | -0.236394 | 0.600445  |
| 8             | 1             | 0           | 7.423838                | -0.651771 | 1.192054  |
| 9             | 6             | 0           | 6.610886                | 1.123461  | 0.279515  |

|    |    |   |           |           |           |
|----|----|---|-----------|-----------|-----------|
| 10 | 6  | 0 | 5.577526  | 1.659695  | -0.487699 |
| 11 | 1  | 0 | 5.588323  | 2.709031  | -0.757812 |
| 12 | 6  | 0 | 4.526039  | 0.852333  | -0.905319 |
| 13 | 1  | 0 | 3.727012  | 1.253465  | -1.516368 |
| 14 | 6  | 0 | 1.414299  | -1.997810 | -1.509100 |
| 15 | 6  | 0 | 0.401616  | -2.578764 | -0.712927 |
| 16 | 6  | 0 | -0.523418 | -3.422024 | -1.356146 |
| 17 | 1  | 0 | -1.234222 | -3.980691 | -0.762004 |
| 18 | 6  | 0 | -0.466853 | -3.629587 | -2.745257 |
| 19 | 1  | 0 | -1.199086 | -4.268898 | -3.223079 |
| 20 | 6  | 0 | 0.544139  | -3.043778 | -3.487658 |
| 21 | 1  | 0 | 0.603279  | -3.212107 | -4.556733 |
| 22 | 6  | 0 | 1.502570  | -2.227325 | -2.867784 |
| 23 | 1  | 0 | 2.290685  | -1.757790 | -3.442675 |
| 24 | 16 | 0 | -2.664400 | -2.345618 | 0.933435  |
| 25 | 6  | 0 | -4.163100 | -1.282777 | 1.137483  |
| 26 | 1  | 0 | -3.995086 | -0.530686 | 1.911322  |
| 27 | 1  | 0 | -4.999158 | -1.916871 | 1.427494  |
| 28 | 6  | 0 | -4.449238 | -0.589521 | -0.185851 |
| 29 | 1  | 0 | -4.675312 | -1.347929 | -0.942670 |
| 30 | 6  | 0 | -5.627678 | 0.382983  | -0.181092 |
| 31 | 8  | 0 | -6.671708 | -0.091978 | 0.521926  |
| 32 | 8  | 0 | -5.635642 | 1.428766  | -0.778862 |
| 33 | 7  | 0 | -3.224811 | 0.137354  | -0.601484 |
| 34 | 1  | 0 | -3.400144 | 0.635704  | -1.470912 |
| 35 | 1  | 0 | -2.994941 | 0.840587  | 0.133870  |
| 36 | 16 | 0 | -0.295395 | 0.569631  | -2.068010 |
| 37 | 6  | 0 | -1.038367 | 2.245506  | -1.748204 |
| 38 | 1  | 0 | -1.284004 | 2.690930  | -2.710138 |
| 39 | 1  | 0 | -1.951892 | 2.163679  | -1.164721 |
| 40 | 6  | 0 | -0.058473 | 3.140614  | -0.987407 |
| 41 | 1  | 0 | 0.809683  | 3.340966  | -1.624793 |
| 42 | 7  | 0 | 0.417628  | 2.446674  | 0.228560  |
| 43 | 1  | 0 | -0.399442 | 2.247777  | 0.836936  |
| 44 | 6  | 0 | -0.620323 | 4.514657  | -0.610109 |
| 45 | 8  | 0 | -1.501267 | 4.973828  | -1.521152 |
| 46 | 8  | 0 | -0.271519 | 5.130846  | 0.360963  |
| 47 | 1  | 0 | 7.419999  | 1.761303  | 0.615893  |
| 48 | 1  | 0 | 1.043522  | 3.046243  | 0.765096  |
| 49 | 1  | 0 | -7.392764 | 0.554063  | 0.461647  |
| 50 | 1  | 0 | 5.573334  | -2.117930 | 0.393561  |
| 51 | 7  | 0 | -1.045574 | -0.580622 | 3.321541  |
| 52 | 6  | 0 | 0.255878  | -0.641179 | 2.564139  |
| 53 | 6  | 0 | 1.115781  | 0.576079  | 2.906324  |
| 54 | 1  | 0 | -0.016532 | -0.622764 | 1.510147  |
| 55 | 6  | 0 | 0.902039  | -2.009205 | 2.976087  |
| 56 | 16 | 0 | 2.549306  | 0.792397  | 1.767714  |
| 57 | 1  | 0 | 1.542210  | 0.456840  | 3.906550  |
| 58 | 1  | 0 | 0.500354  | 1.480311  | 2.903958  |
| 59 | 8  | 0 | 0.758528  | -2.264372 | 4.191168  |
| 60 | 8  | 0 | 1.444071  | -2.655512 | 2.059171  |
| 61 | 17 | 0 | -2.299212 | 1.894602  | 1.799363  |
| 62 | 1  | 0 | 0.548866  | -2.574285 | 0.375463  |
| 63 | 1  | 0 | -1.799892 | 5.849747  | -1.230261 |
| 64 | 1  | 0 | -1.492938 | 0.348354  | 3.249168  |
| 65 | 1  | 0 | -1.680854 | -1.263426 | 2.876068  |
| 66 | 1  | 0 | -0.824686 | -0.905632 | 4.274827  |

HF=-3453.6651348\ZeroPoint=0.4634755\Thermal=0.5057656

G = -13.5 kcal mol<sup>-1</sup>

| Center Number | Atomic Number | Atomic Type | Coordinates (Angstroms) |           |           |
|---------------|---------------|-------------|-------------------------|-----------|-----------|
|               |               |             | X                       | Y         | Z         |
| 1             | 46            | 0           | 1.204313                | 0.557254  | -0.149047 |
| 2             | 46            | 0           | -1.635330               | -0.829713 | -0.874968 |
| 3             | 7             | 0           | 1.858412                | -1.353105 | -0.746855 |
| 4             | 7             | 0           | 3.084407                | -1.528359 | -0.919659 |
| 5             | 6             | 0           | 3.975208                | -0.443696 | -0.773178 |
| 6             | 6             | 0           | 5.034881                | -0.590095 | 0.126662  |
| 7             | 6             | 0           | 5.949489                | 0.447168  | 0.275366  |
| 8             | 1             | 0           | 6.750409                | 0.352362  | 0.999029  |
| 9             | 6             | 0           | 5.842627                | 1.600334  | -0.503517 |
| 10            | 6             | 0           | 4.815993                | 1.714512  | -1.440896 |
| 11            | 1             | 0           | 4.752242                | 2.592901  | -2.073381 |
| 12            | 6             | 0           | 3.874540                | 0.698323  | -1.580241 |
| 13            | 1             | 0           | 3.094798                | 0.760709  | -2.329011 |
| 14            | 6             | 0           | 1.038284                | -2.498559 | -1.028859 |
| 15            | 6             | 0           | -0.350031               | -2.372349 | -1.245553 |
| 16            | 6             | 0           | -0.988702               | -3.524268 | -1.758274 |
| 17            | 1             | 0           | -2.045680               | -3.481287 | -1.982627 |
| 18            | 6             | 0           | -0.329018               | -4.730198 | -1.941954 |
| 19            | 1             | 0           | -0.876074               | -5.586733 | -2.321487 |
| 20            | 6             | 0           | 1.020936                | -4.853079 | -1.594179 |
| 21            | 1             | 0           | 1.529465                | -5.806985 | -1.667815 |
| 22            | 6             | 0           | 1.700420                | -3.741398 | -1.150227 |
| 23            | 1             | 0           | 2.743694                | -3.803043 | -0.879189 |
| 24            | 16            | 0           | -2.903710               | -2.330983 | 0.451445  |
| 25            | 6             | 0           | -4.312182               | -1.225662 | 0.900531  |
| 26            | 1             | 0           | -4.102694               | -0.721837 | 1.843866  |
| 27            | 1             | 0           | -5.203883               | -1.841867 | 1.007058  |
| 28            | 6             | 0           | -4.525215               | -0.187197 | -0.199623 |
| 29            | 1             | 0           | -4.796750               | -0.710396 | -1.123225 |
| 30            | 6             | 0           | -5.656942               | 0.794246  | 0.090640  |
| 31            | 8             | 0           | -6.785157               | 0.162754  | 0.477236  |
| 32            | 8             | 0           | -5.580145               | 1.990092  | -0.045525 |
| 33            | 7             | 0           | -3.261492               | 0.543923  | -0.429156 |
| 34            | 1             | 0           | -3.430898               | 1.299195  | -1.087528 |
| 35            | 1             | 0           | -2.972063               | 0.960201  | 0.470965  |
| 36            | 16            | 0           | -0.201735               | 0.735382  | -2.021557 |
| 37            | 6             | 0           | -0.812240               | 2.447452  | -1.627471 |
| 38            | 1             | 0           | -1.180492               | 2.897458  | -2.547470 |
| 39            | 1             | 0           | -1.622015               | 2.404709  | -0.900901 |
| 40            | 6             | 0           | 0.336253                | 3.259449  | -1.041867 |
| 41            | 1             | 0           | 1.155859                | 3.283992  | -1.769293 |
| 42            | 7             | 0           | 0.825458                | 2.588763  | 0.182565  |
| 43            | 1             | 0           | 0.141433                | 2.648385  | 0.967877  |
| 44            | 6             | 0           | 0.002155                | 4.721472  | -0.742002 |
| 45            | 8             | 0           | -0.770519               | 5.268727  | -1.702302 |
| 46            | 8             | 0           | 0.420912                | 5.322222  | 0.210998  |
| 47            | 1             | 0           | 6.566932                | 2.398752  | -0.392573 |
| 48            | 1             | 0           | 1.664983                | 3.053090  | 0.523351  |
| 49            | 1             | 0           | -7.467234               | 0.837196  | 0.617767  |
| 50            | 1             | 0           | 5.097438                | -1.491617 | 0.724176  |
| 51            | 7             | 0           | -0.364563               | -1.232687 | 2.289816  |

|    |    |   |           |           |           |    |    |   |           |           |           |
|----|----|---|-----------|-----------|-----------|----|----|---|-----------|-----------|-----------|
| 52 | 6  | 0 | -0.239523 | 0.000029  | 3.137032  | 36 | 16 | 0 | -0.301422 | 0.862194  | -1.743690 |
| 53 | 6  | 0 | 1.212704  | 0.396413  | 3.383145  | 37 | 6  | 0 | -0.933772 | 2.472319  | -1.046262 |
| 54 | 1  | 0 | -0.680979 | -0.248322 | 4.106292  | 38 | 1  | 0 | -1.478585 | 3.002524  | -1.824948 |
| 55 | 6  | 0 | -1.135010 | 1.118654  | 2.504662  | 39 | 1  | 0 | -1.591742 | 2.283151  | -0.198173 |
| 56 | 16 | 0 | 2.390101  | 0.422487  | 1.951802  | 40 | 6  | 0 | 0.250216  | 3.298844  | -0.552656 |
| 57 | 1  | 0 | 1.687499  | -0.297049 | 4.080018  | 41 | 1  | 0 | 0.950857  | 3.450823  | -1.382178 |
| 58 | 1  | 0 | 1.208041  | 1.399014  | 3.804423  | 42 | 7  | 0 | 0.941356  | 2.548902  | 0.517547  |
| 59 | 8  | 0 | -0.642178 | 2.264095  | 2.422598  | 43 | 1  | 0 | 0.328158  | 2.485241  | 1.364003  |
| 60 | 8  | 0 | -2.260951 | 0.721296  | 2.144480  | 44 | 6  | 0 | -0.112486 | 4.699218  | -0.054913 |
| 61 | 1  | 0 | 2.565673  | -1.046442 | 2.034046  | 45 | 8  | 0 | -1.087963 | 5.266454  | -0.794385 |
| 62 | 1  | 0 | -0.919028 | 6.199368  | -1.472324 | 46 | 8  | 0 | 0.445948  | 5.250279  | 0.856028  |
| 63 | 1  | 0 | -1.333940 | -1.590638 | 2.240989  | 47 | 1  | 0 | 6.424702  | 2.885167  | -0.879739 |
| 64 | 1  | 0 | -0.165022 | -1.000095 | 1.305876  | 48 | 1  | 0 | 1.797435  | 3.021258  | 0.798008  |
| 65 | 1  | 0 | 0.322163  | -1.976367 | 2.543822  | 49 | 1  | 0 | -7.583228 | 1.172052  | -0.092646 |
| 66 | 17 | 0 | 2.353494  | -2.784366 | 2.402168  | 50 | 1  | 0 | 5.442767  | -1.179817 | 0.136760  |

HF=-3453.6741188\ZeroPoint=0.4607782\Thermal=0.5027546

G = 14.2 kcal mol<sup>-1</sup>

| Center Number | Atomic Number | Atomic Type | Coordinates (Angstroms) |           |           |
|---------------|---------------|-------------|-------------------------|-----------|-----------|
|               |               |             | X                       | Y         | Z         |
| 1             | 46            | 0           | 1.345596                | 0.600707  | -0.071877 |
| 2             | 46            | 0           | -1.718517               | -0.890146 | -0.752568 |
| 3             | 7             | 0           | 2.027477                | -1.184292 | -0.884382 |
| 4             | 7             | 0           | 3.231932                | -1.299448 | -1.208545 |
| 5             | 6             | 0           | 4.050679                | -0.151586 | -1.130657 |
| 6             | 6             | 0           | 5.226587                | -0.254323 | -0.382518 |
| 7             | 6             | 0           | 6.062167                | 0.851666  | -0.273577 |
| 8             | 1             | 0           | 6.953243                | 0.790436  | 0.339747  |
| 9             | 6             | 0           | 5.760629                | 2.032006  | -0.955073 |
| 10            | 6             | 0           | 4.615899                | 2.107720  | -1.748399 |
| 11            | 1             | 0           | 4.398327                | 3.012289  | -2.304961 |
| 12            | 6             | 0           | 3.748293                | 1.022773  | -1.834259 |
| 13            | 1             | 0           | 2.870659                | 1.061006  | -2.467008 |
| 14            | 6             | 0           | 1.234784                | -2.368716 | -1.032737 |
| 15            | 6             | 0           | -0.027365               | -2.438288 | -0.395310 |
| 16            | 6             | 0           | -0.598836               | -3.729169 | -0.365682 |
| 17            | 1             | 0           | -1.509673               | -3.886326 | 0.195762  |
| 18            | 6             | 0           | -0.045517               | -4.824948 | -1.016798 |
| 19            | 1             | 0           | -0.544031               | -5.786690 | -0.972810 |
| 20            | 6             | 0           | 1.140535                | -4.675956 | -1.732801 |
| 21            | 1             | 0           | 1.572567                | -5.512959 | -2.269052 |
| 22            | 6             | 0           | 1.792185                | -3.453939 | -1.721110 |
| 23            | 1             | 0           | 2.748148                | -3.336218 | -2.210865 |
| 24            | 16            | 0           | -3.332219               | -2.390945 | 0.101182  |
| 25            | 6             | 0           | -4.654381               | -1.182276 | 0.499138  |
| 26            | 1             | 0           | -4.442658               | -0.700202 | 1.455544  |
| 27            | 1             | 0           | -5.602646               | -1.715500 | 0.556811  |
| 28            | 6             | 0           | -4.690810               | -0.138210 | -0.611190 |
| 29            | 1             | 0           | -4.912661               | -0.638591 | -1.559159 |
| 30            | 6             | 0           | -5.738309               | 0.953186  | -0.420877 |
| 31            | 8             | 0           | -6.960093               | 0.434766  | -0.183283 |
| 32            | 8             | 0           | -5.519311               | 2.135932  | -0.503767 |
| 33            | 7             | 0           | -3.346026               | 0.468825  | -0.697333 |
| 34            | 1             | 0           | -3.339294               | 1.214403  | -1.387245 |
| 35            | 1             | 0           | -3.108696               | 0.867514  | 0.227582  |

|    |    |   |           |           |           |    |    |   |           |           |           |
|----|----|---|-----------|-----------|-----------|----|----|---|-----------|-----------|-----------|
| 51 | 7  | 0 | -0.406403 | -1.551986 | 2.176461  | 56 | 16 | 0 | 2.493798  | 0.178289  | 1.951050  |
| 52 | 6  | 0 | -0.265302 | -0.288929 | 2.951906  | 57 | 1  | 0 | 1.597445  | -0.590633 | 3.990781  |
| 53 | 6  | 0 | 1.180878  | 0.112948  | 3.264219  | 58 | 1  | 0 | 1.135261  | 1.096348  | 3.728736  |
| 54 | 1  | 0 | -0.713930 | -0.462434 | 3.942170  | 59 | 8  | 0 | -0.787671 | 2.015160  | 2.464406  |
| 55 | 6  | 0 | -1.178297 | 0.829273  | 2.354074  | 60 | 8  | 0 | -2.260843 | 0.431729  | 1.866317  |
| 56 | 16 | 0 | 2.493798  | 0.178289  | 1.951050  | 61 | 1  | 0 | 2.658183  | -1.681803 | 1.931593  |
| 57 | 1  | 0 | 1.597445  | -0.590633 | 3.990781  | 62 | 1  | 0 | -1.249500 | 6.154979  | -0.440663 |
| 58 | 1  | 0 | 1.135261  | 1.096348  | 3.728736  | 63 | 1  | 0 | -1.395070 | -1.813159 | 2.174928  |
| 59 | 8  | 0 | -0.787671 | 2.015160  | 2.464406  | 64 | 1  | 0 | -0.203131 | -1.733151 | 0.794785  |
| 60 | 8  | 0 | -2.260843 | 0.431729  | 1.866317  | 65 | 1  | 0 | 0.140757  | -2.302296 | 2.598171  |
| 61 | 1  | 0 | 2.658183  | -1.681803 | 1.931593  | 66 | 17 | 0 | 2.668392  | -3.095652 | 2.059175  |
| 62 | 1  | 0 | -1.249500 | 6.154979  | -0.440663 |    |    |   |           |           |           |
| 63 | 1  | 0 | -1.395070 | -1.813159 | 2.174928  |    |    |   |           |           |           |
| 64 | 1  | 0 | -0.203131 | -1.733151 | 0.794785  |    |    |   |           |           |           |
| 65 | 1  | 0 | 0.140757  | -2.302296 | 2.598171  |    |    |   |           |           |           |
| 66 | 17 | 0 | 2.668392  | -3.095652 | 2.059175  |    |    |   |           |           |           |

HF=-3453.6251473\ZeroPoint=0.4561745\Thermal=0.4978902

G = -0.6 kcal mol<sup>-1</sup>

| Center Number | Atomic Number | Atomic Type | Coordinates (Angstroms) |           |           |
|---------------|---------------|-------------|-------------------------|-----------|-----------|
|               |               |             | X                       | Y         | Z         |
| 1             | 46            | 0           | 1.326682                | 0.616692  | -0.265813 |
| 2             | 46            | 0           | -1.875998               | -1.217130 | -0.560899 |
| 3             | 7             | 0           | 2.146494                | -1.248679 | -0.712093 |
| 4             | 7             | 0           | 3.337568                | -1.593128 | -0.867726 |
| 5             | 6             | 0           | 4.366774                | -0.660116 | -0.634086 |
| 6             | 6             | 0           | 5.469093                | -1.119285 | 0.097262  |
| 7             | 6             | 0           | 6.520816                | -0.251290 | 0.355451  |
| 8             | 1             | 0           | 7.355599                | -0.585942 | 0.959543  |
| 9             | 6             | 0           | 6.506733                | 1.045727  | -0.163954 |
| 10            | 6             | 0           | 5.434592                | 1.477180  | -0.943002 |
| 11            | 1             | 0           | 5.435882                | 2.474656  | -1.366595 |
| 12            | 6             | 0           | 4.355291                | 0.631852  | -1.175913 |
| 13            | 1             | 0           | 3.525288                | 0.947966  | -1.795427 |
| 14            | 6             | 0           | 1.200257                | -2.234767 | -1.146010 |
| 15            | 6             | 0           | 0.171231                | -2.609288 | -0.258189 |
| 16            | 6             | 0           | -0.757988               | -3.560036 | -0.706494 |
| 17            | 1             | 0           | -1.437774               | -4.014628 | -0.000562 |
| 18            | 6             | 0           | -0.707412               | -4.050429 | -2.027962 |
| 19            | 1             | 0           | -1.451959               | -4.764702 | -2.356810 |

|    |    |   |           |           |           |    |    |   |           |           |           |
|----|----|---|-----------|-----------|-----------|----|----|---|-----------|-----------|-----------|
| 20 | 6  | 0 | 0.300383  | -3.639161 | -2.879160 | 4  | 7  | 0 | 3.339026  | -1.353323 | -0.638892 |
| 21 | 1  | 0 | 0.347382  | -4.014764 | -3.894479 | 5  | 6  | 0 | 4.136683  | -0.222559 | -0.371629 |
| 22 | 6  | 0 | 1.277860  | -2.738106 | -2.430786 | 6  | 6  | 0 | 5.124786  | -0.343108 | 0.611191  |
| 23 | 1  | 0 | 2.078415  | -2.413347 | -3.083061 | 7  | 6  | 0 | 5.947255  | 0.742214  | 0.895245  |
| 24 | 16 | 0 | -3.337254 | -2.593511 | 0.659464  | 8  | 1  | 0 | 6.689233  | 0.660400  | 1.680680  |
| 25 | 6  | 0 | -4.565857 | -1.326089 | 1.171272  | 9  | 6  | 0 | 5.827666  | 1.925486  | 0.165091  |
| 26 | 1  | 0 | -4.216377 | -0.806716 | 2.064080  | 10 | 6  | 0 | 4.885105  | 2.018389  | -0.859223 |
| 27 | 1  | 0 | -5.509590 | -1.828644 | 1.379210  | 11 | 1  | 0 | 4.818126  | 2.921676  | -1.455007 |
| 28 | 6  | 0 | -4.716893 | -0.345377 | 0.018386  | 12 | 6  | 0 | 4.032700  | 0.952703  | -1.131423 |
| 29 | 1  | 0 | -5.088780 | -0.885744 | -0.858990 | 13 | 1  | 0 | 3.323756  | 1.003589  | -1.947696 |
| 30 | 6  | 0 | -5.682319 | 0.813273  | 0.253736  | 14 | 6  | 0 | 1.363993  | -2.392484 | -1.102182 |
| 31 | 8  | 0 | -6.807522 | 0.415767  | 0.879000  | 15 | 6  | 0 | -0.013824 | -2.316123 | -1.406650 |
| 32 | 8  | 0 | -5.487588 | 1.942448  | -0.120192 | 16 | 6  | 0 | -0.570751 | -3.473582 | -1.995330 |
| 33 | 7  | 0 | -3.374137 | 0.200488  | -0.290497 | 17 | 1  | 0 | -1.615601 | -3.466764 | -2.277505 |
| 34 | 1  | 0 | -3.445919 | 0.893815  | -1.029309 | 18 | 6  | 0 | 0.152482  | -4.638938 | -2.194126 |
| 35 | 1  | 0 | -3.005296 | 0.655415  | 0.586749  | 19 | 1  | 0 | -0.333602 | -5.503526 | -2.633465 |
| 36 | 16 | 0 | -0.474024 | 0.350171  | -1.855188 | 20 | 6  | 0 | 1.494809  | -4.708998 | -1.801887 |
| 37 | 6  | 0 | -1.145249 | 2.063120  | -1.586173 | 21 | 1  | 0 | 2.057894  | -5.627968 | -1.912947 |
| 38 | 1  | 0 | -1.731588 | 2.350749  | -2.456521 | 22 | 6  | 0 | 2.096599  | -3.590542 | -1.272739 |
| 39 | 1  | 0 | -1.766238 | 2.095640  | -0.691447 | 23 | 1  | 0 | 3.136090  | -3.614381 | -0.980058 |
| 40 | 6  | 0 | 0.017815  | 3.027636  | -1.369334 | 24 | 16 | 0 | -2.698715 | -2.356862 | 0.101789  |
| 41 | 1  | 0 | 0.688015  | 2.984784  | -2.236082 | 25 | 6  | 0 | -3.910260 | -1.141966 | 0.778191  |
| 42 | 7  | 0 | 0.763230  | 2.608459  | -0.164816 | 26 | 1  | 0 | -3.485804 | -0.601057 | 1.624130  |
| 43 | 1  | 0 | 0.141107  | 2.693867  | 0.680929  | 27 | 1  | 0 | -4.793783 | -1.687168 | 1.107223  |
| 44 | 6  | 0 | -0.394048 | 4.495299  | -1.235772 | 28 | 6  | 0 | -4.266747 | -0.154197 | -0.325440 |
| 45 | 8  | 0 | -1.411457 | 4.817482  | -2.060629 | 29 | 1  | 0 | -4.676742 | -0.714619 | -1.173655 |
| 46 | 8  | 0 | 0.162307  | 5.282752  | -0.517202 | 30 | 6  | 0 | -5.323633 | 0.890081  | 0.034496  |
| 47 | 1  | 0 | 7.337604  | 1.714341  | 0.029131  | 31 | 8  | 0 | -6.235717 | 0.428330  | 0.912442  |
| 48 | 1  | 0 | 1.574331  | 3.202988  | -0.013139 | 32 | 8  | 0 | -5.370592 | 1.989402  | -0.457915 |
| 49 | 1  | 0 | -7.385862 | 1.189118  | 0.967911  | 33 | 7  | 0 | -3.032967 | 0.528188  | -0.777142 |
| 50 | 1  | 0 | 5.451979  | -2.124888 | 0.496567  | 34 | 1  | 0 | -3.267226 | 1.139490  | -1.555161 |
| 51 | 7  | 0 | -0.049854 | -0.805896 | 2.596551  | 35 | 1  | 0 | -2.721052 | 1.131237  | 0.006187  |
| 52 | 6  | 0 | -0.093992 | 0.598828  | 3.014186  | 36 | 16 | 0 | 0.113088  | 0.784003  | -2.140086 |
| 53 | 6  | 0 | 1.281946  | 1.290257  | 3.010890  | 37 | 6  | 0 | -0.592639 | 2.483198  | -1.864630 |
| 54 | 1  | 0 | -0.441962 | 0.702782  | 4.058237  | 38 | 1  | 0 | -0.659052 | 2.973927  | -2.833847 |
| 55 | 6  | 0 | -1.212285 | 1.317118  | 2.208624  | 39 | 1  | 0 | -1.590003 | 2.419717  | -1.438410 |
| 56 | 16 | 0 | 2.561525  | 0.904229  | 1.715897  | 40 | 6  | 0 | 0.311144  | 3.268407  | -0.924036 |
| 57 | 1  | 0 | 1.812170  | 1.028691  | 3.931269  | 41 | 1  | 0 | 1.289951  | 3.400820  | -1.398839 |
| 58 | 1  | 0 | 1.120888  | 2.367835  | 3.016665  | 42 | 7  | 0 | 0.512382  | 2.497566  | 0.326015  |
| 59 | 8  | 0 | -1.017937 | 2.474051  | 1.757695  | 43 | 1  | 0 | -0.399642 | 2.377192  | 0.837094  |
| 60 | 8  | 0 | -2.280987 | 0.663571  | 2.093951  | 44 | 6  | 0 | -0.169768 | 4.680372  | -0.576439 |
| 61 | 1  | 0 | 2.851216  | -0.967310 | 2.170336  | 45 | 8  | 0 | -0.938254 | 5.217775  | -1.541572 |
| 62 | 1  | 0 | -1.603457 | 5.760483  | -1.939853 | 46 | 8  | 0 | 0.153014  | 5.253247  | 0.430503  |
| 63 | 1  | 0 | -0.998189 | -1.171879 | 2.623888  | 47 | 1  | 0 | 6.480434  | 2.763388  | 0.379541  |
| 64 | 1  | 0 | 0.218824  | -2.269997 | 0.773167  | 48 | 1  | 0 | 1.113892  | 3.031734  | 0.951653  |
| 65 | 1  | 0 | 0.530138  | -1.357997 | 3.221504  | 49 | 1  | 0 | -6.878052 | 1.137820  | 1.068565  |
| 66 | 17 | 0 | 3.064742  | -2.297999 | 2.520021  | 50 | 1  | 0 | 5.215465  | -1.274639 | 1.157372  |
|    |    |   |           |           |           | 51 | 7  | 0 | -1.421061 | -1.173235 | 3.521452  |
|    |    |   |           |           |           | 52 | 6  | 0 | -0.282941 | -1.031609 | 2.607312  |
|    |    |   |           |           |           | 53 | 6  | 0 | 0.643593  | 0.017190  | 3.218042  |
|    |    |   |           |           |           | 54 | 1  | 0 | -0.593530 | -0.685131 | 1.609583  |
|    |    |   |           |           |           | 55 | 6  | 0 | 0.421318  | -2.380945 | 2.411797  |
|    |    |   |           |           |           | 56 | 16 | 0 | 2.101131  | 0.463963  | 2.175960  |
|    |    |   |           |           |           | 57 | 1  | 0 | 1.042529  | -0.322171 | 4.173322  |
|    |    |   |           |           |           | 58 | 1  | 0 | 0.088406  | 0.945717  | 3.350952  |
|    |    |   |           |           |           | 59 | 8  | 0 | 1.578563  | -2.576628 | 2.720500  |
|    |    |   |           |           |           | 60 | 8  | 0 | -0.310136 | -3.346771 | 1.865200  |
|    |    |   |           |           |           | 61 | 1  | 0 | 2.645700  | -0.772360 | 2.198043  |

HF=-3453.6497995\ZeroPoint=0.4589639\Thermal=0.5014496

G = -14.9 kcal mol<sup>-1</sup>

| Center Number | Atomic Number | Atomic Type | Coordinates (Angstroms) |           |           |
|---------------|---------------|-------------|-------------------------|-----------|-----------|
|               |               |             | X                       | Y         | Z         |
| 1             | 46            | 0           | 1.220120                | 0.581136  | -0.082203 |
| 2             | 46            | 0           | -1.370690               | -0.826825 | -1.111962 |
| 3             | 7             | 0           | 2.089733                | -1.235090 | -0.666030 |



|    |    |   |           |           |           |
|----|----|---|-----------|-----------|-----------|
| 62 | 17 | 0 | -2.067553 | 1.913020  | 1.890292  |
| 63 | 1  | 0 | -1.145506 | -3.002081 | 1.449505  |
| 64 | 1  | 0 | -1.190884 | 6.111633  | -1.260961 |
| 65 | 1  | 0 | -1.990653 | -0.332495 | 3.444634  |
| 66 | 1  | 0 | -2.004052 | -1.960812 | 3.258205  |

HF=-3453.6757545\ZeroPoint=0.4607747\Thermal=0.503268

G = 16.9 kcal mol<sup>-1</sup>

| Center Number | Atomic Number | Atomic Type | Coordinates (Angstroms) |           |           |
|---------------|---------------|-------------|-------------------------|-----------|-----------|
|               |               |             | X                       | Y         | Z         |
| 1             | 46            | 0           | 1.368017                | 0.526124  | -0.115880 |
| 2             | 46            | 0           | -1.333435               | -1.028654 | -0.729035 |
| 3             | 7             | 0           | 2.330903                | -1.220607 | -0.713218 |
| 4             | 7             | 0           | 3.575929                | -1.373395 | -0.736453 |
| 5             | 6             | 0           | 4.400286                | -0.268399 | -0.451526 |
| 6             | 6             | 0           | 5.479029                | -0.492925 | 0.411799  |
| 7             | 6             | 0           | 6.322203                | 0.561303  | 0.740692  |
| 8             | 1             | 0           | 7.135179                | 0.400861  | 1.438567  |
| 9             | 6             | 0           | 6.130721                | 1.819147  | 0.165110  |
| 10            | 6             | 0           | 5.094421                | 2.021677  | -0.746363 |
| 11            | 1             | 0           | 4.970478                | 2.987559  | -1.222187 |
| 12            | 6             | 0           | 4.219887                | 0.985192  | -1.055784 |
| 13            | 1             | 0           | 3.437740                | 1.120228  | -1.791966 |
| 14            | 6             | 0           | 1.572779                | -2.350140 | -1.165002 |
| 15            | 6             | 0           | 0.284190                | -2.562756 | -0.616376 |
| 16            | 6             | 0           | -0.336609               | -3.776315 | -0.981089 |
| 17            | 1             | 0           | -1.282069               | -4.040511 | -0.526666 |
| 18            | 6             | 0           | 0.226094                | -4.649762 | -1.908847 |
| 19            | 1             | 0           | -0.301540               | -5.555705 | -2.184759 |
| 20            | 6             | 0           | 1.462695                | -4.358516 | -2.482223 |
| 21            | 1             | 0           | 1.897206                | -5.024021 | -3.219202 |
| 22            | 6             | 0           | 2.153730                | -3.217714 | -2.091861 |
| 23            | 1             | 0           | 3.130875                | -2.994006 | -2.498686 |
| 24            | 16            | 0           | -2.719968               | -2.264286 | 0.682701  |
| 25            | 6             | 0           | -4.108445               | -1.064962 | 0.803163  |
| 26            | 1             | 0           | -3.876648               | -0.284117 | 1.529648  |
| 27            | 1             | 0           | -4.996843               | -1.605581 | 1.127751  |
| 28            | 6             | 0           | -4.315434               | -0.452225 | -0.571959 |
| 29            | 1             | 0           | -4.554161               | -1.252867 | -1.280492 |
| 30            | 6             | 0           | -5.434531               | 0.579688  | -0.698157 |
| 31            | 8             | 0           | -6.488304               | 0.294234  | 0.088917  |
| 32            | 8             | 0           | -5.399576               | 1.513541  | -1.459804 |
| 33            | 7             | 0           | -3.035248               | 0.173198  | -0.989171 |
| 34            | 1             | 0           | -3.132093               | 0.549806  | -1.929122 |
| 35            | 1             | 0           | -2.860121               | 0.972931  | -0.342632 |
| 36            | 16            | 0           | 0.085637                | 0.514064  | -2.085921 |
| 37            | 6             | 0           | -0.639855               | 2.221852  | -1.931714 |
| 38            | 1             | 0           | -0.670004               | 2.656227  | -2.929384 |
| 39            | 1             | 0           | -1.651072               | 2.179128  | -1.538543 |
| 40            | 6             | 0           | 0.217231                | 3.078092  | -1.006354 |
| 41            | 1             | 0           | 1.186076                | 3.265259  | -1.481198 |
| 42            | 7             | 0           | 0.468190                | 2.351125  | 0.266594  |
| 43            | 1             | 0           | -0.466029               | 2.213854  | 0.728964  |
| 44            | 6             | 0           | -0.354696               | 4.461128  | -0.674166 |
| 45            | 8             | 0           | -1.251017               | 4.885897  | -1.577966 |

|    |    |   |           |           |           |
|----|----|---|-----------|-----------|-----------|
| 46 | 8  | 0 | 0.021719  | 5.104444  | 0.270718  |
| 47 | 1  | 0 | 6.800901  | 2.634258  | 0.411645  |
| 48 | 1  | 0 | 1.005029  | 2.958010  | 0.885109  |
| 49 | 1  | 0 | -7.163170 | 0.974260  | -0.061479 |
| 50 | 1  | 0 | 5.616767  | -1.479379 | 0.837518  |
| 51 | 7  | 0 | -1.524364 | 0.033336  | 3.751418  |
| 52 | 6  | 0 | -0.485291 | -0.330535 | 2.809824  |
| 53 | 6  | 0 | 0.733764  | 0.558036  | 3.165618  |
| 54 | 1  | 0 | -0.774541 | -0.122011 | 1.773296  |
| 55 | 6  | 0 | -0.116014 | -1.826204 | 2.884830  |
| 56 | 16 | 0 | 2.257021  | 0.343645  | 2.116883  |
| 57 | 1  | 0 | 1.044870  | 0.364899  | 4.193056  |
| 58 | 1  | 0 | 0.448574  | 1.607311  | 3.084594  |
| 59 | 8  | 0 | -0.501647 | -2.520251 | 3.803658  |
| 60 | 8  | 0 | 0.694021  | -2.228555 | 1.921270  |
| 61 | 1  | 0 | 2.102223  | -1.023955 | 2.070256  |
| 62 | 17 | 0 | -2.439132 | 2.291817  | 1.208076  |
| 63 | 1  | 0 | 0.263095  | -2.212311 | 0.645584  |
| 64 | 1  | 0 | -1.580662 | 5.751936  | -1.290689 |
| 65 | 1  | 0 | -2.197520 | 0.661356  | 3.326765  |
| 66 | 1  | 0 | -1.967480 | -0.796763 | 4.128188  |

HF=-3453.6205235\ZeroPoint=0.455663\Thermal=0.4978756

G = -13.4 kcal mol<sup>-1</sup>

| Center Number | Atomic Number | Atomic Type | Coordinates (Angstroms) |           |           |
|---------------|---------------|-------------|-------------------------|-----------|-----------|
|               |               |             | X                       | Y         | Z         |
| 1             | 46            | 0           | 1.344157                | 0.589322  | -0.232634 |
| 2             | 46            | 0           | -1.478008               | -1.239456 | -0.765169 |
| 3             | 7             | 0           | 2.387575                | -1.156631 | -0.683852 |
| 4             | 7             | 0           | 3.610278                | -1.419859 | -0.727369 |
| 5             | 6             | 0           | 4.547365                | -0.429079 | -0.389610 |
| 6             | 6             | 0           | 5.673507                | -0.869048 | 0.320119  |
| 7             | 6             | 0           | 6.642771                | 0.048449  | 0.698716  |
| 8             | 1             | 0           | 7.494176                | -0.278189 | 1.283515  |
| 9             | 6             | 0           | 6.526652                | 1.387468  | 0.316328  |
| 10            | 6             | 0           | 5.439706                | 1.808199  | -0.448984 |
| 11            | 1             | 0           | 5.367112                | 2.840730  | -0.769125 |
| 12            | 6             | 0           | 4.442668                | 0.907244  | -0.802175 |
| 13            | 1             | 0           | 3.606353                | 1.218136  | -1.415623 |
| 14            | 6             | 0           | 1.549891                | -2.186310 | -1.236736 |
| 15            | 6             | 0           | 0.485448                | -2.695693 | -0.459930 |
| 16            | 6             | 0           | -0.379936               | -3.625794 | -1.060175 |
| 17            | 1             | 0           | -1.119586               | -4.135400 | -0.458191 |
| 18            | 6             | 0           | -0.215067               | -3.990824 | -2.409037 |
| 19            | 1             | 0           | -0.904761               | -4.694022 | -2.858929 |
| 20            | 6             | 0           | 0.839643                | -3.474084 | -3.139594 |
| 21            | 1             | 0           | 0.977775                | -3.759473 | -4.175810 |
| 22            | 6             | 0           | 1.737131                | -2.570994 | -2.550779 |
| 23            | 1             | 0           | 2.553235                | -2.145098 | -3.120062 |
| 24            | 16            | 0           | -2.686018               | -2.456185 | 0.815997  |
| 25            | 6             | 0           | -3.991717               | -1.201476 | 1.154904  |
| 26            | 1             | 0           | -3.618893               | -0.436666 | 1.837141  |
| 27            | 1             | 0           | -4.841307               | -1.709309 | 1.609875  |
| 28            | 6             | 0           | -4.376254               | -0.577981 | -0.173541 |
| 29            | 1             | 0           | -4.755654               | -1.361170 | -0.838046 |

|    |    |   |           |           |           |    |    |   |           |           |           |
|----|----|---|-----------|-----------|-----------|----|----|---|-----------|-----------|-----------|
| 30 | 6  | 0 | -5.444020 | 0.516148  | -0.147622 | 14 | 6  | 0 | -1.636232 | 2.575202  | -0.434011 |
| 31 | 8  | 0 | -6.300582 | 0.382239  | 0.878297  | 15 | 6  | 0 | -0.261661 | 2.649161  | -0.766111 |
| 32 | 8  | 0 | -5.531942 | 1.367530  | -0.996390 | 16 | 6  | 0 | 0.224102  | 3.969973  | -0.914723 |
| 33 | 7  | 0 | -3.143790 | -0.007505 | -0.785652 | 17 | 1  | 0 | 1.252123  | 4.119259  | -1.217387 |
| 34 | 1  | 0 | -3.358438 | 0.347191  | -1.715119 | 18 | 6  | 0 | -0.549117 | 5.101525  | -0.676038 |
| 35 | 1  | 0 | -2.866731 | 0.807550  | -0.186884 | 19 | 1  | 0 | -0.105103 | 6.084182  | -0.794993 |
| 36 | 16 | 0 | -0.124794 | 0.320373  | -2.146801 | 20 | 6  | 0 | -1.877242 | 4.976484  | -0.263337 |
| 37 | 6  | 0 | -0.905351 | 2.006073  | -2.060211 | 21 | 1  | 0 | -2.475595 | 5.850261  | -0.034248 |
| 38 | 1  | 0 | -1.035886 | 2.363023  | -3.080137 | 22 | 6  | 0 | -2.422943 | 3.711246  | -0.160874 |
| 39 | 1  | 0 | -1.880937 | 1.962237  | -1.585154 | 23 | 1  | 0 | -3.455206 | 3.573024  | 0.133050  |
| 40 | 6  | 0 | -0.019734 | 2.971310  | -1.274556 | 24 | 16 | 0 | 2.737179  | 2.424382  | 0.141664  |
| 41 | 1  | 0 | 0.902790  | 3.150807  | -1.837008 | 25 | 6  | 0 | 4.099718  | 1.180662  | 0.157638  |
| 42 | 7  | 0 | 0.353657  | 2.377715  | 0.032903  | 26 | 1  | 0 | 3.932171  | 0.434211  | 0.934906  |
| 43 | 1  | 0 | -0.526817 | 2.238626  | 0.579683  | 27 | 1  | 0 | 5.034576  | 1.704276  | 0.351305  |
| 44 | 6  | 0 | -0.630875 | 4.356442  | -1.032421 | 28 | 6  | 0 | 4.136157  | 0.501476  | -1.206041 |
| 45 | 8  | 0 | -1.582422 | 4.668729  | -1.929684 | 29 | 1  | 0 | 4.302791  | 1.266305  | -1.973314 |
| 46 | 8  | 0 | -0.248498 | 5.094328  | -0.163156 | 30 | 6  | 0 | 5.246714  | -0.531995 | -1.394282 |
| 47 | 1  | 0 | 7.293299  | 2.098571  | 0.601101  | 31 | 8  | 0 | 6.383875  | -0.189755 | -0.756856 |
| 48 | 1  | 0 | 0.922266  | 3.039047  | 0.560344  | 32 | 8  | 0 | 5.137675  | -1.514589 | -2.082938 |
| 49 | 1  | 0 | -6.947132 | 1.103118  | 0.822327  | 33 | 7  | 0 | 2.822929  | -0.132205 | -1.456841 |
| 50 | 1  | 0 | 5.745944  | -1.914087 | 0.595084  | 34 | 1  | 0 | 2.831977  | -0.565613 | -2.376898 |
| 51 | 7  | 0 | -1.221231 | 0.187446  | 3.794453  | 35 | 1  | 0 | 2.724350  | -0.890586 | -0.756867 |
| 52 | 6  | 0 | -0.122100 | -0.157460 | 2.911752  | 36 | 16 | 0 | -0.457279 | -0.465165 | -2.042813 |
| 53 | 6  | 0 | 0.933679  | 0.968065  | 3.005448  | 37 | 6  | 0 | 0.313660  | -2.162037 | -1.938278 |
| 54 | 1  | 0 | -0.435655 | -0.228372 | 1.853627  | 38 | 1  | 0 | 0.217294  | -2.623713 | -2.919065 |
| 55 | 6  | 0 | 0.380338  | -1.569889 | 3.244739  | 39 | 1  | 0 | 1.367513  | -2.095943 | -1.686044 |
| 56 | 16 | 0 | 2.395174  | 0.866571  | 1.868270  | 40 | 6  | 0 | -0.400566 | -3.000705 | -0.879638 |
| 57 | 1  | 0 | 1.347761  | 0.996700  | 4.016239  | 41 | 1  | 0 | -1.433585 | -3.177201 | -1.197712 |
| 58 | 1  | 0 | 0.411776  | 1.911989  | 2.843764  | 42 | 7  | 0 | -0.439523 | -2.255107 | 0.402975  |
| 59 | 8  | 0 | -0.252754 | -2.352782 | 3.902816  | 43 | 1  | 0 | 0.543259  | -2.139732 | 0.735592  |
| 60 | 8  | 0 | 1.546345  | -1.945051 | 2.671490  | 44 | 6  | 0 | 0.204899  | -4.386882 | -0.638795 |
| 61 | 1  | 0 | 2.022659  | -1.154398 | 2.313199  | 45 | 8  | 0 | 0.864406  | -4.857862 | -1.713398 |
| 62 | 17 | 0 | -2.479804 | 2.201634  | 1.235457  | 46 | 8  | 0 | 0.053136  | -4.998557 | 0.385045  |
| 63 | 1  | 0 | 0.483383  | -2.532294 | 0.611366  | 47 | 1  | 0 | -6.575939 | -2.931328 | -0.971284 |
| 64 | 1  | 0 | -1.926075 | 5.547840  | -1.705790 | 48 | 1  | 0 | -0.925436 | -2.796067 | 1.117456  |
| 65 | 1  | 0 | -1.844472 | 0.843962  | 3.333328  | 49 | 1  | 0 | 7.042768  | -0.876822 | -0.941678 |
| 66 | 1  | 0 | -1.731258 | -0.647503 | 4.061796  | 50 | 1  | 0 | -3.864727 | -0.426765 | 1.228759  |

HF=-3453.6730401\ZeroPoint=0.4621728\Thermal=0.5047415

G = -9.7 kcal mol<sup>-1</sup>

| Center<br>Number | Atomic<br>Number | Atomic<br>Type | Coordinates (Angstroms) |           |           |
|------------------|------------------|----------------|-------------------------|-----------|-----------|
|                  |                  |                | X                       | Y         | Z         |
| 1                | 46               | 0              | -1.326625               | -0.414780 | 0.105204  |
| 2                | 46               | 0              | 1.139662                | 1.161875  | -1.089658 |
| 3                | 7                | 0              | -2.316786               | 1.310902  | -0.420626 |
| 4                | 7                | 0              | -3.498441               | 1.347256  | -0.833032 |
| 5                | 6                | 0              | -4.284218               | 0.176658  | -0.806534 |
| 6                | 6                | 0              | -4.388218               | -0.664956 | 0.311316  |
| 7                | 6                | 0              | -5.222981               | -1.776966 | 0.240836  |
| 8                | 1                | 0              | -5.320481               | -2.420535 | 1.107502  |
| 9                | 6                | 0              | -5.935030               | -2.058307 | -0.925144 |
| 10               | 6                | 0              | -5.844979               | -1.200942 | -2.023856 |
| 11               | 1                | 0              | -6.410457               | -1.408047 | -2.924806 |
| 12               | 6                | 0              | -5.045210               | -0.066557 | -1.957268 |
| 13               | 1                | 0              | -4.976128               | 0.622943  | -2.789850 |

|    |    |   |           |           |           |
|----|----|---|-----------|-----------|-----------|
| 51 | 7  | 0 | 0.539970  | 2.055463  | 2.342298  |
| 52 | 6  | 0 | 0.314194  | 0.590659  | 2.656978  |
| 53 | 1  | 0 | 1.489566  | 2.215241  | 1.908379  |
| 54 | 1  | 0 | 0.382196  | 2.620673  | 3.178868  |
| 55 | 6  | 0 | 1.172788  | 0.191088  | 3.849700  |
| 56 | 1  | 0 | 0.631211  | 0.049788  | 1.767174  |
| 57 | 6  | 0 | -1.207252 | 0.461670  | 2.943567  |
| 58 | 16 | 0 | 0.953927  | -1.578453 | 4.282089  |
| 59 | 1  | 0 | 0.863169  | 0.756795  | 4.730970  |
| 60 | 1  | 0 | 2.227367  | 0.384316  | 3.642067  |
| 61 | 8  | 0 | -1.911885 | -0.235664 | 2.119443  |
| 62 | 8  | 0 | -1.631001 | 1.076246  | 3.913773  |
| 63 | 1  | 0 | 1.663939  | -2.046091 | 3.223053  |
| 64 | 17 | 0 | 2.591024  | -2.018715 | 1.021931  |
| 65 | 1  | 0 | -0.113550 | 2.368718  | 1.614612  |
| 66 | 1  | 0 | 1.215400  | -5.733448 | -1.487141 |

HF=-3453.6674434\ZeroPoint=0.4618021\Thermal=0.5042702

G = 11.4 kcal mol<sup>-1</sup>

| Center Number | Atomic Number | Atomic Type | Coordinates (Angstroms) |           |           |                                                        |               |             |                         |           |           |
|---------------|---------------|-------------|-------------------------|-----------|-----------|--------------------------------------------------------|---------------|-------------|-------------------------|-----------|-----------|
|               |               |             | X                       | Y         | Z         |                                                        |               |             |                         |           |           |
| 1             | 46            | 0           | -1.390067               | -0.348230 | 0.090794  | 56                                                     | 1             | 0           | 0.476589                | -0.275347 | 1.869028  |
| 2             | 46            | 0           | 1.300458                | 1.206052  | -0.727922 | 57                                                     | 6             | 0           | -1.381229               | 0.109388  | 2.992261  |
| 3             | 7             | 0           | -2.353302               | 1.440569  | -0.373063 | 58                                                     | 16            | 0           | 0.780177                | -2.091752 | 4.148462  |
| 4             | 7             | 0           | -3.489734               | 1.478192  | -0.899838 | 59                                                     | 1             | 0           | 0.569904                | 0.174469  | 4.877125  |
| 5             | 6             | 0           | -4.298109               | 0.330077  | -0.939020 | 60                                                     | 1             | 0           | 2.003133                | -0.021229 | 3.836019  |
| 6             | 6             | 0           | -4.476612               | -0.542906 | 0.146774  | 61                                                     | 8             | 0           | -2.095752               | -0.407473 | 2.035916  |
| 7             | 6             | 0           | -5.337624               | -1.625688 | 0.002582  | 62                                                     | 8             | 0           | -1.842359               | 0.527771  | 4.042367  |
| 8             | 1             | 0           | -5.492508               | -2.291886 | 0.843257  | 63                                                     | 1             | 0           | 1.557162                | -2.403644 | 3.083673  |
| 9             | 6             | 0           | -6.003203               | -1.851102 | -1.203441 | 64                                                     | 17            | 0           | 2.550253                | -2.129064 | 0.768085  |
| 10            | 6             | 0           | -5.840392               | -0.964345 | -2.269828 | 65                                                     | 1             | 0           | 0.049043                | 2.057648  | 1.143182  |
| 11            | 1             | 0           | -6.370184               | -1.127375 | -3.200943 | 66                                                     | 1             | 0           | 1.113975                | -5.561051 | -1.869465 |
| 12            | 6             | 0           | -5.014890               | 0.144166  | -2.130111 | -----                                                  |               |             |                         |           |           |
| 13            | 1             | 0           | -4.889889               | 0.857238  | -2.935914 | HF=-3453.6301553\ZeroPoint=0.4574173\Thermal=0.4995795 |               |             |                         |           |           |
| 14            | 6             | 0           | -1.647671               | 2.697770  | -0.356285 | G = 1.1 kcal mol <sup>-1</sup>                         |               |             |                         |           |           |
| 15            | 6             | 0           | -0.288653               | 2.733641  | 0.048697  | -----                                                  |               |             |                         |           |           |
| 16            | 6             | 0           | 0.312620                | 4.013662  | 0.053842  | Center Number                                          | Atomic Number | Atomic Type | Coordinates (Angstroms) |           |           |
| 17            | 1             | 0           | 1.335178                | 4.111351  | 0.394804  | X                                                      | Y             | Z           | -----                   |           |           |
| 18            | 6             | 0           | -0.355271               | 5.165399  | -0.341738 | 1                                                      | 46            | 0           | -1.376302               | -0.335013 | -0.128136 |
| 19            | 1             | 0           | 0.157209                | 6.120632  | -0.331163 | 2                                                      | 46            | 0           | 1.376859                | 1.487956  | -0.148299 |
| 20            | 6             | 0           | -1.691547               | 5.084617  | -0.731648 | 3                                                      | 7             | 0           | -2.501118               | 1.433492  | 0.003216  |
| 21            | 1             | 0           | -2.233763               | 5.975771  | -1.026470 | 4                                                      | 7             | 0           | -3.683460               | 1.707526  | -0.304359 |
| 22            | 6             | 0           | -2.340003               | 3.858966  | -0.723228 | 5                                                      | 6             | 0           | -4.661651               | 0.724673  | -0.502652 |
| 23            | 1             | 0           | -3.382594               | 3.787605  | -0.998297 | 6                                                      | 6             | 0           | -4.724277               | -0.518668 | 0.149740  |
| 24            | 16            | 0           | 2.999711                | 2.276236  | 0.499793  | 7                                                      | 6             | 0           | -5.785040               | -1.370001 | -0.134444 |
| 25            | 6             | 0           | 4.335123                | 1.037204  | 0.235501  | 8                                                      | 1             | 0           | -5.847436               | -2.321649 | 0.380225  |
| 26            | 1             | 0           | 4.208811                | 0.188976  | 0.909961  | 9                                                      | 6             | 0           | -6.767683               | -1.006763 | -1.058231 |
| 27            | 1             | 0           | 5.292320                | 1.520134  | 0.427261  | 10                                                     | 6             | 0           | -6.715632               | 0.239711  | -1.685222 |
| 28            | 6             | 0           | 4.243543                | 0.572171  | -1.210606 | 11                                                     | 1             | 0           | -7.488002               | 0.531781  | -2.386730 |
| 29            | 1             | 0           | 4.380040                | 1.436894  | -1.868983 | 12                                                     | 6             | 0           | -5.682329               | 1.117057  | -1.387061 |
| 30            | 6             | 0           | 5.272772                | -0.469174 | -1.645889 | 13                                                     | 1             | 0           | -5.632933               | 2.100850  | -1.837832 |
| 31            | 8             | 0           | 6.482773                | -0.249668 | -1.098568 | 14                                                     | 6             | 0           | -1.646351               | 2.586360  | 0.087625  |
| 32            | 8             | 0           | 5.040597                | -1.352906 | -2.431387 | 15                                                     | 6             | 0           | -0.584443               | 2.561831  | 1.020793  |
| 33            | 7             | 0           | 2.882441                | 0.024173  | -1.431692 | 16                                                     | 6             | 0           | 0.279962                | 3.667847  | 1.056496  |
| 34            | 1             | 0           | 2.781866                | -0.270574 | -2.400012 | 17                                                     | 1             | 0           | 1.023587                | 3.734387  | 1.838328  |
| 35            | 1             | 0           | 2.787000                | -0.818276 | -0.822513 | 18                                                     | 6             | 0           | 0.131830                | 4.731950  | 0.153629  |
| 36            | 16            | 0           | -0.345844               | -0.203833 | -1.980149 | 19                                                     | 1             | 0           | 0.824935                | 5.563462  | 0.186596  |
| 37            | 6             | 0           | 0.319674                | -1.945803 | -2.043442 | 20                                                     | 6             | 0           | -0.907519               | 4.714492  | -0.763189 |
| 38            | 1             | 0           | 0.204809                | -2.300161 | -3.065965 | 21                                                     | 1             | 0           | -1.026549               | 5.529166  | -1.468070 |
| 39            | 1             | 0           | 1.373679                | -1.965092 | -1.781990 | 22                                                     | 6             | 0           | -1.807364               | 3.644019  | -0.795296 |
| 40            | 6             | 0           | -0.450428               | -2.847568 | -1.077682 | 23                                                     | 1             | 0           | -2.613339               | 3.615196  | -1.515646 |
| 41            | 1             | 0           | -1.475371               | -2.972630 | -1.442206 | 24                                                     | 16            | 0           | 2.855580                | 1.918867  | 1.612149  |
| 42            | 7             | 0           | -0.517346               | -2.208337 | 0.259120  | 25                                                     | 6             | 0           | 4.258562                | 0.870089  | 1.038251  |
| 43            | 1             | 0           | 0.460676                | -2.128765 | 0.612389  | 26                                                     | 1             | 0           | 4.090716                | -0.173537 | 1.306436  |
| 44            | 6             | 0           | 0.118712                | -4.262251 | -0.933717 | 27                                                     | 1             | 0           | 5.170011                | 1.230032  | 1.513844  |
| 45            | 8             | 0           | 0.783291                | -4.663974 | -2.033126 | 28                                                     | 6             | 0           | 4.342599                | 1.014537  | -0.470902 |
| 46            | 8             | 0           | -0.066218               | -4.947765 | 0.036050  | 29                                                     | 1             | 0           | 4.529394                | 2.064424  | -0.719953 |
| 47            | 1             | 0           | -6.664952               | -2.703622 | -1.305317 | 30                                                     | 6             | 0           | 5.427335                | 0.204147  | -1.180591 |
| 48            | 1             | 0           | -1.020469               | -2.799434 | 0.920599  | 31                                                     | 8             | 0           | 6.520632                | 0.028092  | -0.419644 |
| 49            | 1             | 0           | 7.087988                | -0.929380 | -1.433702 | 32                                                     | 8             | 0           | 5.325760                | -0.179316 | -2.318524 |
| 50            | 1             | 0           | -3.984351               | -0.355599 | 1.093164  | 33                                                     | 7             | 0           | 3.024486                | 0.625680  | -1.042422 |
| 51            | 7             | 0           | 0.384940                | 1.693049  | 2.500777  | 34                                                     | 1             | 0           | 3.035973                | 0.754796  | -2.052049 |
| 52            | 6             | 0           | 0.146509                | 0.253359  | 2.762482  | 35                                                     | 1             | 0           | 2.905488                | -0.399196 | -0.845637 |
| 53            | 1             | 0           | 1.385843                | 1.902141  | 2.484212  | 36                                                     | 16            | 0           | -0.158167               | 0.613890  | -1.910032 |
| 54            | 1             | 0           | -0.075138               | 2.262428  | 3.209756  | 37                                                     | 6             | 0           | 0.568787                | -0.966700 | -2.583867 |
| 55            | 6             | 0           | 0.946570                | -0.269710 | 3.954847  | 38                                                     | 1             | 0           | 0.457444                | -0.937660 | -3.666076 |
|               |               |             |                         |           |           | 39                                                     | 1             | 0           | 1.626665                | -1.033027 | -2.347595 |

|    |    |   |           |           |           |    |    |   |           |           |           |
|----|----|---|-----------|-----------|-----------|----|----|---|-----------|-----------|-----------|
| 40 | 6  | 0 | -0.153949 | -2.186530 | -2.007937 | 24 | 16 | 0 | 2.488638  | 2.289190  | 1.301406  |
| 41 | 1  | 0 | -1.158811 | -2.245737 | -2.438029 | 25 | 6  | 0 | 3.602529  | 0.840349  | 1.599102  |
| 42 | 7  | 0 | -0.299880 | -2.038205 | -0.539390 | 26 | 1  | 0 | 3.056237  | 0.035442  | 2.090362  |
| 43 | 1  | 0 | 0.659093  | -2.011053 | -0.140644 | 27 | 1  | 0 | 4.402392  | 1.165602  | 2.263898  |
| 44 | 6  | 0 | 0.510477  | -3.532673 | -2.317507 | 28 | 6  | 0 | 4.168806  | 0.378713  | 0.266287  |
| 45 | 8  | 0 | 1.269938  | -3.486873 | -3.427138 | 29 | 1  | 0 | 4.685153  | 1.220322  | -0.207153 |
| 46 | 8  | 0 | 0.307801  | -4.523953 | -1.669932 | 30 | 6  | 0 | 5.195198  | -0.756391 | 0.312061  |
| 47 | 1  | 0 | -7.585719 | -1.685303 | -1.272102 | 31 | 8  | 0 | 5.623152  | -1.049257 | 1.553392  |
| 48 | 1  | 0 | -0.748378 | -2.856481 | -0.122768 | 32 | 8  | 0 | 5.601157  | -1.304489 | -0.682253 |
| 49 | 1  | 0 | 7.165215  | -0.479592 | -0.937006 | 33 | 7  | 0 | 3.054027  | -0.021280 | -0.634676 |
| 50 | 1  | 0 | -3.985791 | -0.796561 | 0.892819  | 34 | 1  | 0 | 3.441509  | -0.196009 | -1.559882 |
| 51 | 7  | 0 | 0.056363  | 0.418498  | 3.425565  | 35 | 1  | 0 | 2.700824  | -0.940768 | -0.310499 |
| 52 | 6  | 0 | -0.071707 | -0.889607 | 2.765959  | 36 | 16 | 0 | 0.006611  | 0.407681  | -2.305566 |
| 53 | 1  | 0 | 1.036331  | 0.681180  | 3.499079  | 37 | 6  | 0 | 0.612963  | -1.308877 | -2.695781 |
| 54 | 1  | 0 | -0.343345 | 0.370046  | 4.358919  | 38 | 1  | 0 | 0.690835  | -1.392405 | -3.778412 |
| 55 | 6  | 0 | 0.677972  | -2.025192 | 3.474366  | 39 | 1  | 0 | 1.590894  | -1.481344 | -2.253046 |
| 56 | 1  | 0 | 0.338914  | -0.776668 | 1.761209  | 40 | 6  | 0 | -0.381316 | -2.317079 | -2.138695 |
| 57 | 6  | 0 | -1.581815 | -1.209512 | 2.707087  | 41 | 1  | 0 | -1.346291 | -2.192662 | -2.641791 |
| 58 | 16 | 0 | 0.551801  | -3.649875 | 2.605316  | 42 | 7  | 0 | -0.573969 | -2.049345 | -0.691276 |
| 59 | 1  | 0 | 0.245072  | -2.177552 | 4.464179  | 43 | 1  | 0 | 0.341997  | -2.283658 | -0.232926 |
| 60 | 1  | 0 | 1.732733  | -1.766361 | 3.581974  | 44 | 6  | 0 | -0.010567 | -3.794484 | -2.307234 |
| 61 | 8  | 0 | -2.187419 | -1.197594 | 1.544118  | 45 | 8  | 0 | 0.854370  | -4.006451 | -3.310627 |
| 62 | 8  | 0 | -2.171208 | -1.451349 | 3.746362  | 46 | 8  | 0 | -0.506602 | -4.665041 | -1.638349 |
| 63 | 1  | 0 | 1.524698  | -3.405832 | 1.696762  | 47 | 1  | 0 | -6.426951 | -2.157398 | 0.134622  |
| 64 | 17 | 0 | 2.799215  | -2.264141 | -0.120314 | 48 | 1  | 0 | -1.258337 | -2.702570 | -0.308799 |
| 65 | 1  | 0 | -0.549667 | 1.814899  | 1.819497  | 49 | 1  | 0 | 6.243032  | -1.791532 | 1.480830  |
| 66 | 1  | 0 | 1.668637  | -4.362463 | -3.549760 | 50 | 1  | 0 | -4.947147 | 1.501565  | 1.849940  |

HF=-3453.6482789\ZeroPoint=0.4605067\Thermal=0.5034431

G = -14.2 kcal mol<sup>-1</sup>

| Center Number | Atomic Number | Atomic Type | Coordinates (Angstroms) |           |           |
|---------------|---------------|-------------|-------------------------|-----------|-----------|
|               |               |             | X                       | Y         | Z         |
| 1             | 46            | 0           | -1.113964               | -0.092211 | -0.321724 |
| 2             | 46            | 0           | 1.449906                | 1.432405  | -0.628662 |
| 3             | 7             | 0           | -1.949149               | 1.858299  | -0.212090 |
| 4             | 7             | 0           | -3.177755               | 2.003912  | 0.025210  |
| 5             | 6             | 0           | -4.020317               | 0.875196  | 0.017580  |
| 6             | 6             | 0           | -4.932545               | 0.746435  | 1.072336  |
| 7             | 6             | 0           | -5.779094               | -0.356767 | 1.123215  |
| 8             | 1             | 0           | -6.462208               | -0.471222 | 1.956637  |
| 9             | 6             | 0           | -5.759609               | -1.304627 | 0.098097  |
| 10            | 6             | 0           | -4.900875               | -1.135575 | -0.988611 |
| 11            | 1             | 0           | -4.913620               | -1.847929 | -1.805499 |
| 12            | 6             | 0           | -4.027983               | -0.052462 | -1.036260 |
| 13            | 1             | 0           | -3.384503               | 0.103577  | -1.892324 |
| 14            | 6             | 0           | -1.206381               | 3.064041  | -0.393362 |
| 15            | 6             | 0           | 0.192576                | 3.016398  | -0.576459 |
| 16            | 6             | 0           | 0.831760                | 4.256756  | -0.793716 |
| 17            | 1             | 0           | 1.906795                | 4.275510  | -0.920857 |
| 18            | 6             | 0           | 0.138139                | 5.455924  | -0.833417 |
| 19            | 1             | 0           | 0.674880                | 6.382511  | -1.007652 |
| 20            | 6             | 0           | -1.251476               | 5.473460  | -0.646962 |
| 21            | 1             | 0           | -1.800816               | 6.407057  | -0.678385 |
| 22            | 6             | 0           | -1.917327               | 4.287862  | -0.431356 |
| 23            | 1             | 0           | -2.989816               | 4.277225  | -0.298463 |

|    |    |   |           |           |           |    |    |   |           |           |           |
|----|----|---|-----------|-----------|-----------|----|----|---|-----------|-----------|-----------|
| 51 | 7  | 0 | -1.910680 | -0.575043 | 1.655323  | 56 | 16 | 0 | -1.698861 | -3.672674 | 2.157091  |
| 52 | 6  | 0 | -1.029972 | -1.006658 | 2.780092  | 57 | 1  | 0 | 0.046506  | -2.684740 | 3.540523  |
| 53 | 6  | 0 | -0.427822 | -2.404527 | 2.603035  | 58 | 1  | 0 | 0.352472  | -2.409886 | 1.842784  |
| 54 | 1  | 0 | -1.631953 | -0.994569 | 3.699093  | 59 | 8  | 0 | 1.140786  | -0.328798 | 3.551676  |
| 55 | 6  | 0 | 0.120164  | -0.011469 | 2.994223  | 60 | 8  | 0 | -0.152572 | 1.192916  | 2.500873  |
| 56 | 16 | 0 | -1.698861 | -3.672674 | 2.157091  | 61 | 1  | 0 | -0.889934 | -4.403762 | 1.362383  |
| 57 | 1  | 0 | 0.046506  | -2.684740 | 3.540523  | 62 | 17 | 0 | 2.181736  | -2.947843 | 0.206263  |
| 58 | 1  | 0 | 0.352472  | -2.409886 | 1.842784  | 63 | 1  | 0 | 0.706642  | 1.696034  | 2.355368  |
| 59 | 8  | 0 | 1.140786  | -0.328798 | 3.551676  | 64 | 1  | 0 | 1.058655  | -4.954462 | -3.334299 |
| 60 | 8  | 0 | -0.152572 | 1.192916  | 2.500873  | 65 | 1  | 0 | -2.645416 | -1.271876 | 1.534923  |
| 61 | 1  | 0 | -0.889934 | -4.403762 | 1.362383  | 66 | 1  | 0 | -2.367619 | 0.285007  | 1.942857  |
| 62 | 17 | 0 | 2.181736  | -2.947843 | 0.206263  |    |    |   |           |           |           |
| 63 | 1  | 0 | 0.706642  | 1.696034  | 2.355368  |    |    |   |           |           |           |
| 64 | 1  | 0 | 1.058655  | -4.954462 | -3.334299 |    |    |   |           |           |           |
| 65 | 1  | 0 | -2.645416 | -1.271876 | 1.534923  |    |    |   |           |           |           |
| 66 | 1  | 0 | -2.367619 | 0.285007  | 1.942857  |    |    |   |           |           |           |

HF=-3453.6746323\ZeroPoint=0.4612679\Thermal=0.5036985

G = 14.9 kcal mol<sup>-1</sup>

| Center Number | Atomic Number | Atomic Type | Coordinates (Angstroms) |           |           |
|---------------|---------------|-------------|-------------------------|-----------|-----------|
|               |               |             | X                       | Y         | Z         |
| 1             | 46            | 0           | -1.213128               | -0.386913 | -0.281472 |
| 2             | 46            | 0           | 1.265441                | 1.361563  | -0.415149 |
| 3             | 7             | 0           | -2.325698               | 1.375372  | -0.570233 |
| 4             | 7             | 0           | -3.574759               | 1.443601  | -0.578181 |
| 5             | 6             | 0           | -4.310534               | 0.248078  | -0.421876 |
| 6             | 6             | 0           | -5.348274               | 0.267968  | 0.517138  |
| 7             | 6             | 0           | -6.091562               | -0.886548 | 0.740932  |

|    |    |   |           |           |           |
|----|----|---|-----------|-----------|-----------|
| 8  | 1  | 0 | -6.874413 | -0.883885 | 1.490045  |
| 9  | 6  | 0 | -5.840477 | -2.039064 | -0.006638 |
| 10 | 6  | 0 | -4.847699 | -2.033606 | -0.986668 |
| 11 | 1  | 0 | -4.677668 | -2.916400 | -1.592075 |
| 12 | 6  | 0 | -4.073638 | -0.895742 | -1.197230 |
| 13 | 1  | 0 | -3.323788 | -0.870118 | -1.977417 |
| 14 | 6  | 0 | -1.647098 | 2.613760  | -0.830591 |
| 15 | 6  | 0 | -0.382454 | 2.808601  | -0.225871 |
| 16 | 6  | 0 | 0.182305  | 4.090819  | -0.372947 |
| 17 | 1  | 0 | 1.111715  | 4.316307  | 0.134129  |
| 18 | 6  | 0 | -0.421855 | 5.071869  | -1.156852 |
| 19 | 1  | 0 | 0.055200  | 6.038459  | -1.273788 |
| 20 | 6  | 0 | -1.637268 | 4.813492  | -1.790782 |
| 21 | 1  | 0 | -2.100922 | 5.569535  | -2.413932 |
| 22 | 6  | 0 | -2.270472 | 3.588748  | -1.608598 |
| 23 | 1  | 0 | -3.231089 | 3.384738  | -2.063035 |
| 24 | 16 | 0 | 2.391474  | 2.232411  | 1.419849  |
| 25 | 6  | 0 | 3.843696  | 1.098611  | 1.386022  |
| 26 | 1  | 0 | 3.598104  | 0.145207  | 1.857757  |
| 27 | 1  | 0 | 4.654002  | 1.571595  | 1.940057  |
| 28 | 6  | 0 | 4.233886  | 0.875894  | -0.063984 |
| 29 | 1  | 0 | 4.479451  | 1.843642  | -0.514624 |
| 30 | 6  | 0 | 5.434278  | -0.032087 | -0.329508 |
| 31 | 8  | 0 | 6.329781  | -0.019502 | 0.674041  |
| 32 | 8  | 0 | 5.585233  | -0.645236 | -1.356651 |
| 33 | 7  | 0 | 3.051754  | 0.322557  | -0.776939 |
| 34 | 1  | 0 | 3.267698  | 0.237783  | -1.767845 |
| 35 | 1  | 0 | 2.907460  | -0.642601 | -0.411596 |
| 36 | 16 | 0 | 0.015123  | 0.120349  | -2.205534 |
| 37 | 6  | 0 | 0.836242  | -1.532114 | -2.450517 |
| 38 | 1  | 0 | 0.875765  | -1.723080 | -3.521388 |
| 39 | 1  | 0 | 1.850999  | -1.523900 | -2.061413 |
| 40 | 6  | 0 | 0.032626  | -2.614922 | -1.740262 |
| 41 | 1  | 0 | -0.936311 | -2.731874 | -2.236528 |
| 42 | 7  | 0 | -0.217252 | -2.198546 | -0.336127 |
| 43 | 1  | 0 | 0.721546  | -2.136168 | 0.120115  |
| 44 | 6  | 0 | 0.664874  | -4.011719 | -1.733555 |
| 45 | 8  | 0 | 1.578603  | -4.174669 | -2.703418 |
| 46 | 8  | 0 | 0.315142  | -4.874628 | -0.971342 |
| 47 | 1  | 0 | -6.431687 | -2.931814 | 0.159742  |
| 48 | 1  | 0 | -0.698598 | -2.944184 | 0.168706  |
| 49 | 1  | 0 | 7.061550  | -0.604632 | 0.423719  |
| 50 | 1  | 0 | -5.536525 | 1.177683  | 1.074874  |
| 51 | 7  | 0 | -2.020863 | -0.743599 | 1.685266  |
| 52 | 6  | 0 | -1.165189 | -0.425827 | 2.876820  |
| 53 | 6  | 0 | 0.124782  | -1.240018 | 2.905035  |
| 54 | 1  | 0 | -1.750728 | -0.652432 | 3.775691  |
| 55 | 6  | 0 | -0.798322 | 1.085516  | 2.955963  |
| 56 | 16 | 0 | -0.204573 | -3.062760 | 2.919605  |
| 57 | 1  | 0 | 0.669237  | -0.961804 | 3.804405  |
| 58 | 1  | 0 | 0.756380  | -1.010316 | 2.046230  |
| 59 | 8  | 0 | -0.177831 | 1.456604  | 3.931374  |
| 60 | 8  | 0 | -1.229865 | 1.791729  | 1.956055  |
| 61 | 1  | 0 | 0.919292  | -3.398743 | 2.243193  |
| 62 | 17 | 0 | 2.705490  | -2.463729 | 0.566730  |
| 63 | 1  | 0 | -0.483967 | 2.228186  | 0.973084  |
| 64 | 1  | 0 | 1.951680  | -5.065855 | -2.616436 |
| 65 | 1  | 0 | -2.316827 | -1.716653 | 1.756036  |

|    |   |   |           |           |          |
|----|---|---|-----------|-----------|----------|
| 66 | 1 | 0 | -2.857555 | -0.169493 | 1.746583 |
|----|---|---|-----------|-----------|----------|

HF=-3453.6251473\ZeroPoint=0.4570099\Thermal=0.4990321

G = 2.5 kcal mol<sup>-1</sup>

| Center Number | Atomic Number | Atomic Type | Coordinates (Angstroms) |           |           |
|---------------|---------------|-------------|-------------------------|-----------|-----------|
|               |               |             | X                       | Y         | Z         |
| 1             | 46            | 0           | 1.281836                | 0.464432  | -0.268838 |
| 2             | 46            | 0           | -1.631000               | -1.431658 | -0.307763 |
| 3             | 7             | 0           | 2.253475                | -1.364688 | -0.541626 |
| 4             | 7             | 0           | 3.456990                | -1.618799 | -0.722358 |
| 5             | 6             | 0           | 4.378563                | -0.548969 | -0.724276 |
| 6             | 6             | 0           | 5.510190                | -0.681150 | 0.086965  |
| 7             | 6             | 0           | 6.442105                | 0.349336  | 0.110957  |
| 8             | 1             | 0           | 7.301148                | 0.275568  | 0.766982  |
| 9             | 6             | 0           | 6.275921                | 1.474435  | -0.701507 |
| 10            | 6             | 0           | 5.167458                | 1.575403  | -1.541522 |
| 11            | 1             | 0           | 5.052075                | 2.434672  | -2.191921 |
| 12            | 6             | 0           | 4.206358                | 0.567595  | -1.552006 |
| 13            | 1             | 0           | 3.352901                | 0.619408  | -2.216942 |
| 14            | 6             | 0           | 1.368676                | -2.482080 | -0.737468 |
| 15            | 6             | 0           | 0.376976                | -2.749516 | 0.236506  |
| 16            | 6             | 0           | -0.516154               | -3.800455 | -0.029209 |
| 17            | 1             | 0           | -1.184768               | -4.137760 | 0.750440  |
| 18            | 6             | 0           | -0.460849               | -4.512542 | -1.243256 |
| 19            | 1             | 0           | -1.175167               | -5.304975 | -1.429630 |
| 20            | 6             | 0           | 0.520829                | -4.217559 | -2.170595 |
| 21            | 1             | 0           | 0.577158                | -4.767676 | -3.102538 |
| 22            | 6             | 0           | 1.453228                | -3.200553 | -1.914619 |
| 23            | 1             | 0           | 2.218628                | -2.952416 | -2.638596 |
| 24            | 16            | 0           | -2.888955               | -2.319099 | 1.437094  |
| 25            | 6             | 0           | -4.210058               | -1.035525 | 1.480643  |
| 26            | 1             | 0           | -3.862539               | -0.144273 | 2.005427  |
| 27            | 1             | 0           | -5.070809               | -1.452693 | 2.002298  |
| 28            | 6             | 0           | -4.554737               | -0.698152 | 0.042630  |
| 29            | 1             | 0           | -4.906824               | -1.604583 | -0.460989 |
| 30            | 6             | 0           | -5.628596               | 0.365034  | -0.187016 |
| 31            | 8             | 0           | -6.545889               | 0.394404  | 0.794029  |
| 32            | 8             | 0           | -5.671044               | 1.056266  | -1.173754 |
| 33            | 7             | 0           | -3.304268               | -0.249152 | -0.629073 |
| 34            | 1             | 0           | -3.488629               | -0.087102 | -1.616695 |
| 35            | 1             | 0           | -3.046204               | 0.669218  | -0.196308 |
| 36            | 16            | 0           | -0.264421               | -0.146883 | -1.954762 |
| 37            | 6             | 0           | -1.048484               | 1.520215  | -2.218358 |
| 38            | 1             | 0           | -1.168454               | 1.661294  | -3.290881 |
| 39            | 1             | 0           | -2.026400               | 1.567870  | -1.749418 |
| 40            | 6             | 0           | -0.166791               | 2.618728  | -1.629388 |
| 41            | 1             | 0           | 0.741835                | 2.719622  | -2.231969 |
| 42            | 7             | 0           | 0.235361                | 2.246682  | -0.249596 |
| 43            | 1             | 0           | -0.645733               | 2.138126  | 0.302160  |
| 44            | 6             | 0           | -0.802706               | 4.013361  | -1.601658 |
| 45            | 8             | 0           | -1.778679               | 4.155206  | -2.513472 |
| 46            | 8             | 0           | -0.412095               | 4.889563  | -0.876492 |
| 47            | 1             | 0           | 7.016581                | 2.265594  | -0.687331 |
| 48            | 1             | 0           | 0.720590                | 3.026476  | 0.195761  |
| 49            | 1             | 0           | -7.196612               | 1.078948  | 0.573192  |

|    |    |   |           |           |           |
|----|----|---|-----------|-----------|-----------|
| 50 | 1  | 0 | 5.590839  | -1.543892 | 0.733986  |
| 51 | 7  | 0 | 2.491507  | 1.075784  | 1.373879  |
| 52 | 6  | 0 | 2.043411  | 0.530833  | 2.696220  |
| 53 | 6  | 0 | 0.606278  | 0.896493  | 3.016925  |
| 54 | 1  | 0 | 2.712320  | 0.944375  | 3.461226  |
| 55 | 6  | 0 | 2.329153  | -1.014040 | 2.626417  |
| 56 | 16 | 0 | 0.409607  | 2.740989  | 3.134870  |
| 57 | 1  | 0 | 0.334738  | 0.436143  | 3.964070  |
| 58 | 1  | 0 | -0.080806 | 0.515881  | 2.259931  |
| 59 | 8  | 0 | 1.390260  | -1.773748 | 2.926674  |
| 60 | 8  | 0 | 3.481664  | -1.274341 | 2.208151  |
| 61 | 1  | 0 | -0.841390 | 2.801802  | 2.619975  |
| 62 | 17 | 0 | -2.627176 | 2.316504  | 0.913876  |
| 63 | 1  | 0 | 0.478430  | -2.328686 | 1.240081  |
| 64 | 1  | 0 | -2.143064 | 5.050029  | -2.426269 |
| 65 | 1  | 0 | 2.539381  | 2.092063  | 1.414232  |
| 66 | 1  | 0 | 3.434791  | 0.705786  | 1.244275  |

HF=-3453.6469824\ZeroPoint=0.4610271\Thermal=0.5035013

G = -5.8 kcal mol<sup>-1</sup>

| Center Number | Atomic Number | Atomic Type | Coordinates (Angstroms) |           |           |
|---------------|---------------|-------------|-------------------------|-----------|-----------|
|               |               |             | X                       | Y         | Z         |
| 1             | 46            | 0           | 1.451348                | 0.291802  | 0.218200  |
| 2             | 46            | 0           | -1.398880               | -0.437425 | -1.407291 |
| 3             | 7             | 0           | 2.030181                | -1.413261 | -0.772470 |
| 4             | 7             | 0           | 3.168242                | -1.695339 | -1.196568 |
| 5             | 6             | 0           | 4.182400                | -0.705905 | -1.147351 |
| 6             | 6             | 0           | 5.388774                | -1.080604 | -0.548852 |
| 7             | 6             | 0           | 6.432478                | -0.164462 | -0.476362 |
| 8             | 1             | 0           | 7.356220                | -0.442069 | 0.017595  |
| 9             | 6             | 0           | 6.296345                | 1.100202  | -1.049678 |
| 10            | 6             | 0           | 5.109855                | 1.446722  | -1.695546 |
| 11            | 1             | 0           | 5.012211                | 2.416346  | -2.170405 |
| 12            | 6             | 0           | 4.043958                | 0.553343  | -1.741992 |
| 13            | 1             | 0           | 3.129058                | 0.810597  | -2.256772 |
| 14            | 6             | 0           | 1.067050                | -2.483656 | -0.757566 |
| 15            | 6             | 0           | -0.317774               | -2.202161 | -0.866292 |
| 16            | 6             | 0           | -1.117914               | -3.367004 | -0.746764 |
| 17            | 1             | 0           | -2.191622               | -3.295442 | -0.849881 |
| 18            | 6             | 0           | -0.623602               | -4.644767 | -0.501019 |
| 19            | 1             | 0           | -1.313934               | -5.476823 | -0.405836 |
| 20            | 6             | 0           | 0.752514                | -4.855054 | -0.381079 |
| 21            | 1             | 0           | 1.154826                | -5.842404 | -0.185630 |
| 22            | 6             | 0           | 1.596249                | -3.769256 | -0.528025 |
| 23            | 1             | 0           | 2.669321                | -3.884640 | -0.444792 |
| 24            | 16            | 0           | -2.831112               | 1.170708  | -2.412296 |
| 25            | 6             | 0           | -4.440462               | 0.611477  | -1.711755 |
| 26            | 1             | 0           | -4.939912               | -0.068543 | -2.411026 |
| 27            | 1             | 0           | -5.080735               | 1.480385  | -1.560547 |
| 28            | 6             | 0           | -4.207527               | -0.090421 | -0.375262 |
| 29            | 1             | 0           | -3.794769               | 0.630895  | 0.335722  |
| 30            | 6             | 0           | -5.495847               | -0.663826 | 0.190733  |
| 31            | 8             | 0           | -6.368936               | 0.305898  | 0.524567  |
| 32            | 8             | 0           | -5.734514               | -1.843007 | 0.315488  |
| 33            | 7             | 0           | -3.213804               | -1.175859 | -0.556253 |

|    |    |   |           |           |           |
|----|----|---|-----------|-----------|-----------|
| 34 | 1  | 0 | -2.949858 | -1.539236 | 0.358212  |
| 35 | 1  | 0 | -3.651220 | -1.933092 | -1.077506 |
| 36 | 16 | 0 | 0.445122  | 1.007196  | -1.776881 |
| 37 | 6  | 0 | -0.118771 | 2.681233  | -1.170796 |
| 38 | 1  | 0 | -0.048322 | 3.373431  | -2.007119 |
| 39 | 1  | 0 | -1.157131 | 2.607185  | -0.856826 |
| 40 | 6  | 0 | 0.771490  | 3.131353  | -0.017426 |
| 41 | 1  | 0 | 1.800743  | 3.262157  | -0.370009 |
| 42 | 7  | 0 | 0.786048  | 2.083339  | 1.039045  |
| 43 | 1  | 0 | -0.190986 | 1.986932  | 1.367058  |
| 44 | 6  | 0 | 0.380100  | 4.469460  | 0.614962  |
| 45 | 8  | 0 | -0.197039 | 5.307893  | -0.261849 |
| 46 | 8  | 0 | 0.627549  | 4.752173  | 1.759220  |
| 47 | 1  | 0 | 7.117613  | 1.806135  | -1.007329 |
| 48 | 1  | 0 | 1.330612  | 2.409649  | 1.835416  |
| 49 | 1  | 0 | -7.170137 | -0.120810 | 0.864021  |
| 50 | 1  | 0 | 5.484059  | -2.071938 | -0.123075 |
| 51 | 7  | 0 | 0.508506  | -2.635814 | 2.434714  |
| 52 | 6  | 0 | 0.218875  | -1.503968 | 3.376497  |
| 53 | 6  | 0 | 1.479906  | -0.633386 | 3.590438  |
| 54 | 1  | 0 | -0.111101 | -1.922747 | 4.330459  |
| 55 | 6  | 0 | -0.995563 | -0.755990 | 2.789906  |
| 56 | 16 | 0 | 2.611466  | -0.566186 | 2.142704  |
| 57 | 1  | 0 | 2.075842  | -1.048922 | 4.406251  |
| 58 | 1  | 0 | 1.145634  | 0.356358  | 3.893521  |
| 59 | 8  | 0 | -1.137229 | 0.423313  | 3.300119  |
| 60 | 8  | 0 | -1.704840 | -1.317041 | 1.971322  |
| 61 | 1  | 0 | -0.415730 | 6.126466  | 0.210029  |
| 62 | 1  | 0 | 1.385272  | -2.347310 | 1.921579  |
| 63 | 1  | 0 | -0.273691 | -2.709433 | 1.760016  |
| 64 | 1  | 0 | 0.659522  | -3.532964 | 2.889293  |
| 65 | 1  | 0 | -1.772284 | 1.062828  | 2.736264  |
| 66 | 17 | 0 | -2.384116 | 2.306054  | 1.626604  |

HF=-3453.6611848\ZeroPoint=0.4618817\Thermal=0.5042377

G = 5.2 kcal mol<sup>-1</sup>

| Center Number | Atomic Number | Atomic Type | Coordinates (Angstroms) |           |           |
|---------------|---------------|-------------|-------------------------|-----------|-----------|
|               |               |             | X                       | Y         | Z         |
| 1             | 46            | 0           | 1.514346                | 0.287235  | 0.106991  |
| 2             | 46            | 0           | -1.440204               | -0.620713 | -0.935713 |
| 3             | 7             | 0           | 2.112395                | -1.630714 | -0.453054 |
| 4             | 7             | 0           | 3.289236                | -2.006155 | -0.666915 |
| 5             | 6             | 0           | 4.317107                | -1.045859 | -0.659257 |
| 6             | 6             | 0           | 5.497075                | -1.395220 | 0.009033  |
| 7             | 6             | 0           | 6.549648                | -0.491225 | 0.061008  |
| 8             | 1             | 0           | 7.448686                | -0.743883 | 0.610534  |
| 9             | 6             | 0           | 6.454936                | 0.734841  | -0.601760 |
| 10            | 6             | 0           | 5.303523                | 1.053053  | -1.320048 |
| 11            | 1             | 0           | 5.244415                | 1.987485  | -1.866168 |
| 12            | 6             | 0           | 4.226352                | 0.172701  | -1.348281 |
| 13            | 1             | 0           | 3.347590                | 0.393640  | -1.938639 |
| 14            | 6             | 0           | 1.099260                | -2.644926 | -0.564647 |
| 15            | 6             | 0           | -0.158801               | -2.379468 | 0.025167  |
| 16            | 6             | 0           | -1.042577               | -3.483383 | 0.045266  |
| 17            | 1             | 0           | -1.989046               | -3.389315 | 0.567928  |

|    |    |   |           |           |           |    |    |   |           |           |           |
|----|----|---|-----------|-----------|-----------|----|----|---|-----------|-----------|-----------|
| 18 | 6  | 0 | -0.753961 | -4.699890 | -0.562004 | 2  | 46 | 0 | 0.926251  | -1.154790 | -1.501659 |
| 19 | 1  | 0 | -1.477461 | -5.508004 | -0.537672 | 3  | 7  | 0 | -0.392954 | 2.302785  | 0.234439  |
| 20 | 6  | 0 | 0.468963  | -4.874582 | -1.218717 | 4  | 7  | 0 | -1.049779 | 3.163213  | -0.389827 |
| 21 | 1  | 0 | 0.691395  | -5.806866 | -1.724818 | 5  | 6  | 0 | -2.408450 | 2.893247  | -0.676040 |
| 22 | 6  | 0 | 1.406585  | -3.854464 | -1.206400 | 6  | 6  | 0 | -3.328876 | 2.545464  | 0.320546  |
| 23 | 1  | 0 | 2.370251  | -3.981382 | -1.681445 | 7  | 6  | 0 | -4.652955 | 2.300560  | -0.033587 |
| 24 | 16 | 0 | -2.861832 | 0.398775  | -2.467917 | 8  | 1  | 0 | -5.370285 | 2.044689  | 0.737889  |
| 25 | 6  | 0 | -4.484195 | 0.052803  | -1.658917 | 9  | 6  | 0 | -5.055190 | 2.389071  | -1.366588 |
| 26 | 1  | 0 | -4.942399 | -0.831086 | -2.114814 | 10 | 6  | 0 | -4.136287 | 2.764891  | -2.348063 |
| 27 | 1  | 0 | -5.137545 | 0.909479  | -1.824564 | 11 | 1  | 0 | -4.447367 | 2.845133  | -3.383042 |
| 28 | 6  | 0 | -4.285412 | -0.167550 | -0.160976 | 12 | 6  | 0 | -2.818674 | 3.044796  | -2.002863 |
| 29 | 1  | 0 | -3.938649 | 0.763985  | 0.296098  | 13 | 1  | 0 | -2.090689 | 3.331130  | -2.751512 |
| 30 | 6  | 0 | -5.574756 | -0.612637 | 0.508381  | 14 | 6  | 0 | 0.973160  | 2.667288  | 0.499329  |
| 31 | 8  | 0 | -6.494078 | 0.371324  | 0.519558  | 15 | 6  | 0 | 1.635780  | 2.061983  | 1.563942  |
| 32 | 8  | 0 | -5.773880 | -1.716495 | 0.957971  | 16 | 6  | 0 | 2.949076  | 2.432328  | 1.846479  |
| 33 | 7  | 0 | -3.233232 | -1.191765 | 0.042566  | 17 | 1  | 0 | 3.451243  | 1.966246  | 2.685160  |
| 34 | 1  | 0 | -3.009172 | -1.245768 | 1.037272  | 18 | 6  | 0 | 3.601059  | 3.377287  | 1.060749  |
| 35 | 1  | 0 | -3.584115 | -2.099240 | -0.256218 | 19 | 1  | 0 | 4.626976  | 3.653767  | 1.277491  |
| 36 | 16 | 0 | 0.379939  | 0.508763  | -1.957550 | 20 | 6  | 0 | 2.935769  | 3.958631  | -0.024458 |
| 37 | 6  | 0 | -0.069746 | 2.313844  | -1.813214 | 21 | 1  | 0 | 3.447865  | 4.674096  | -0.657415 |
| 38 | 1  | 0 | 0.073187  | 2.766663  | -2.792300 | 22 | 6  | 0 | 1.624260  | 3.611075  | -0.307802 |
| 39 | 1  | 0 | -1.118092 | 2.385911  | -1.533361 | 23 | 1  | 0 | 1.105981  | 4.034113  | -1.156057 |
| 40 | 6  | 0 | 0.817163  | 2.997221  | -0.774359 | 24 | 16 | 0 | 1.839683  | 0.771042  | -2.401463 |
| 41 | 1  | 0 | 1.848439  | 3.042025  | -1.141300 | 25 | 6  | 0 | 3.440457  | 0.650729  | -1.504260 |
| 42 | 7  | 0 | 0.825324  | 2.210336  | 0.486519  | 26 | 1  | 0 | 3.316768  | 0.969314  | -0.467605 |
| 43 | 1  | 0 | -0.151443 | 2.185403  | 0.820578  | 27 | 1  | 0 | 4.158251  | 1.313581  | -1.988086 |
| 44 | 6  | 0 | 0.430331  | 4.444330  | -0.455395 | 28 | 6  | 0 | 3.939985  | -0.797723 | -1.543314 |
| 45 | 8  | 0 | -0.158564 | 5.061948  | -1.493191 | 29 | 1  | 0 | 4.084264  | -1.085308 | -2.587524 |
| 46 | 8  | 0 | 0.693336  | 4.978180  | 0.591054  | 30 | 6  | 0 | 5.267592  | -0.956932 | -0.814354 |
| 47 | 1  | 0 | 7.284993  | 1.431108  | -0.572769 | 31 | 8  | 0 | 6.253567  | -0.276708 | -1.443028 |
| 48 | 1  | 0 | 1.364410  | 2.703345  | 1.196519  | 32 | 8  | 0 | 5.439683  | -1.591971 | 0.194553  |
| 49 | 1  | 0 | -7.293952 | 0.026697  | 0.944893  | 33 | 7  | 0 | 2.906953  | -1.674519 | -0.953859 |
| 50 | 1  | 0 | 5.553828  | -2.354692 | 0.508122  | 34 | 1  | 0 | 3.095521  | -2.656583 | -1.139445 |
| 51 | 7  | 0 | 0.357934  | -1.836899 | 2.597397  | 35 | 1  | 0 | 2.880059  | -1.568888 | 0.066924  |
| 52 | 6  | 0 | 0.167041  | -0.611044 | 3.426331  | 36 | 16 | 0 | -1.178398 | -0.157601 | -1.764062 |
| 53 | 6  | 0 | 1.446009  | 0.257069  | 3.504936  | 37 | 6  | 0 | -2.467655 | -1.487805 | -1.712568 |
| 54 | 1  | 0 | -0.090429 | -0.925894 | 4.443707  | 38 | 1  | 0 | -3.200419 | -1.268316 | -2.487089 |
| 55 | 6  | 0 | -1.098191 | 0.084936  | 2.904906  | 39 | 1  | 0 | -1.990465 | -2.441706 | -1.928443 |
| 56 | 16 | 0 | 2.681648  | 0.042808  | 2.158976  | 40 | 6  | 0 | -3.158677 | -1.519914 | -0.343266 |
| 57 | 1  | 0 | 1.992902  | -0.001326 | 4.414755  | 41 | 1  | 0 | -3.801669 | -0.638487 | -0.252238 |
| 58 | 1  | 0 | 1.139944  | 1.296757  | 3.592988  | 42 | 7  | 0 | -2.151948 | -1.457302 | 0.739842  |
| 59 | 8  | 0 | -1.057957 | 1.384825  | 2.981711  | 43 | 1  | 0 | -1.486178 | -2.226310 | 0.629849  |
| 60 | 8  | 0 | -2.030129 | -0.593626 | 2.509945  | 44 | 6  | 0 | -4.051559 | -2.742195 | -0.163601 |
| 61 | 1  | 0 | -0.383963 | 5.962551  | -1.212912 | 45 | 8  | 0 | -4.921592 | -2.870640 | -1.186579 |
| 62 | 1  | 0 | 1.363761  | -2.026824 | 2.523333  | 46 | 8  | 0 | -4.011841 | -3.486401 | 0.781758  |
| 63 | 1  | 0 | -0.007499 | -1.798494 | 1.403192  | 47 | 1  | 0 | -6.085008 | 2.186039  | -1.637273 |
| 64 | 1  | 0 | -0.131084 | -2.638807 | 2.985623  | 48 | 1  | 0 | -2.601412 | -1.574456 | 1.644881  |
| 65 | 1  | 0 | -1.750665 | 1.847085  | 2.360002  | 49 | 1  | 0 | 7.068355  | -0.401392 | -0.933058 |
| 66 | 17 | 0 | -2.383203 | 2.704573  | 0.849894  | 50 | 1  | 0 | -3.020795 | 2.496836  | 1.356074  |
|    |    |   |           |           |           | 51 | 7  | 0 | 1.499362  | 0.108309  | 4.196148  |
|    |    |   |           |           |           | 52 | 6  | 0 | 0.658754  | -1.025960 | 3.850217  |
|    |    |   |           |           |           | 53 | 6  | 0 | -0.845801 | -0.674703 | 3.874054  |
|    |    |   |           |           |           | 54 | 1  | 0 | 0.760447  | -1.877032 | 4.547952  |
|    |    |   |           |           |           | 55 | 6  | 0 | 1.098794  | -1.601153 | 2.508840  |
|    |    |   |           |           |           | 56 | 16 | 0 | -1.416071 | 0.795400  | 2.924029  |
|    |    |   |           |           |           | 57 | 1  | 0 | -1.119685 | -0.439924 | 4.907408  |
|    |    |   |           |           |           | 58 | 1  | 0 | -1.403430 | -1.570546 | 3.598706  |
|    |    |   |           |           |           | 59 | 8  | 0 | 0.338209  | -2.640199 | 2.163863  |

HF=-3453.6422434\ZeroPoint=0.4590659\Thermal=0.5009419

G = -41.5 kcal mol<sup>-1</sup>

| Center Number | Atomic Number | Atomic Type | Coordinates (Angstroms) |          |          |
|---------------|---------------|-------------|-------------------------|----------|----------|
|               |               |             | X                       | Y        | Z        |
| 1             | 46            | 0           | -1.165034               | 0.373087 | 0.608570 |

|    |    |   |           |           |           |
|----|----|---|-----------|-----------|-----------|
| 60 | 8  | 0 | 2.045309  | -1.199996 | 1.865587  |
| 61 | 1  | 0 | -5.467481 | -3.653844 | -1.016863 |
| 62 | 1  | 0 | 1.252661  | 0.480841  | 5.105626  |
| 63 | 1  | 0 | 1.141634  | 1.346546  | 2.202579  |
| 64 | 1  | 0 | 2.478994  | -0.152415 | 4.200406  |
| 65 | 1  | 0 | 0.562643  | -2.964279 | 1.254171  |
| 66 | 17 | 0 | 0.216608  | -3.371872 | -0.751780 |

-----

HF=-3453.7183273\ZeroPoint=0.4625088\Thermal=0.5055282

G = -14.4 kcal mol<sup>-1</sup>

| Center Number | Atomic Number | Atomic Type | Coordinates (Angstroms) |           |           |
|---------------|---------------|-------------|-------------------------|-----------|-----------|
|               |               |             | X                       | Y         | Z         |
| 1             | 46            | 0           | 1.363390                | 0.136217  | 0.057632  |
| 2             | 46            | 0           | -1.313442               | -0.221567 | -1.544236 |
| 3             | 7             | 0           | 1.717770                | -1.833112 | -0.495210 |
| 4             | 7             | 0           | 2.854897                | -2.349250 | -0.412794 |
| 5             | 6             | 0           | 3.947123                | -1.514229 | -0.080690 |
| 6             | 6             | 0           | 4.763020                | -1.899504 | 0.985637  |
| 7             | 6             | 0           | 5.858949                | -1.114297 | 1.327610  |
| 8             | 1             | 0           | 6.471309                | -1.391258 | 2.177664  |
| 9             | 6             | 0           | 6.174578                | 0.018815  | 0.577004  |
| 10            | 6             | 0           | 5.389516                | 0.365695  | -0.522363 |
| 11            | 1             | 0           | 5.652022                | 1.225428  | -1.128569 |
| 12            | 6             | 0           | 4.269556                | -0.390758 | -0.854008 |
| 13            | 1             | 0           | 3.669635                | -0.144482 | -1.720209 |
| 14            | 6             | 0           | 0.657402                | -2.702086 | -0.922400 |
| 15            | 6             | 0           | -0.554212               | -2.155449 | -1.391428 |
| 16            | 6             | 0           | -1.477755               | -3.103167 | -1.886059 |
| 17            | 1             | 0           | -2.408404               | -2.758286 | -2.325593 |
| 18            | 6             | 0           | -1.254435               | -4.473345 | -1.860004 |
| 19            | 1             | 0           | -2.008237               | -5.151327 | -2.246747 |
| 20            | 6             | 0           | -0.063651               | -4.976289 | -1.325969 |
| 21            | 1             | 0           | 0.110995                | -6.044161 | -1.268910 |
| 22            | 6             | 0           | 0.892382                | -4.091677 | -0.872594 |
| 23            | 1             | 0           | 1.827612                | -4.451824 | -0.466697 |
| 24            | 16            | 0           | -2.584737               | 1.768333  | -1.963897 |
| 25            | 6             | 0           | -4.072303               | 1.386405  | -0.942883 |
| 26            | 1             | 0           | -4.894096               | 1.030069  | -1.570010 |
| 27            | 1             | 0           | -4.389086               | 2.298141  | -0.433036 |
| 28            | 6             | 0           | -3.710583               | 0.332546  | 0.099138  |
| 29            | 1             | 0           | -2.947747               | 0.770995  | 0.737090  |
| 30            | 6             | 0           | -4.865341               | -0.078335 | 0.997993  |
| 31            | 8             | 0           | -5.901356               | -0.596305 | 0.315054  |
| 32            | 8             | 0           | -4.861873               | 0.022808  | 2.206063  |
| 33            | 7             | 0           | -3.124661               | -0.852730 | -0.583445 |
| 34            | 1             | 0           | -2.930183               | -1.601260 | 0.082155  |
| 35            | 1             | 0           | -3.787003               | -1.214354 | -1.267224 |
| 36            | 16            | 0           | 0.769404                | 0.689940  | -2.169065 |
| 37            | 6             | 0           | 0.673379                | 2.534962  | -1.924331 |
| 38            | 1             | 0           | 1.030700                | 3.008334  | -2.836630 |
| 39            | 1             | 0           | -0.367374               | 2.813391  | -1.756303 |
| 40            | 6             | 0           | 1.536429                | 2.945024  | -0.735355 |
| 41            | 1             | 0           | 2.584490                | 2.708232  | -0.953300 |
| 42            | 7             | 0           | 1.150620                | 2.167851  | 0.469017  |
| 43            | 1             | 0           | 0.178569                | 2.396102  | 0.753092  |

|    |    |   |           |           |           |
|----|----|---|-----------|-----------|-----------|
| 44 | 6  | 0 | 1.523105  | 4.440622  | -0.412059 |
| 45 | 8  | 0 | 1.383205  | 5.202385  | -1.514409 |
| 46 | 8  | 0 | 1.680460  | 4.882144  | 0.695669  |
| 47 | 1  | 0 | 7.038099  | 0.619235  | 0.838427  |
| 48 | 1  | 0 | 1.730240  | 2.453752  | 1.256559  |
| 49 | 1  | 0 | -6.583856 | -0.861623 | 0.951138  |
| 50 | 1  | 0 | 4.508815  | -2.785568 | 1.554019  |
| 51 | 7  | 0 | -2.145365 | 0.362177  | 3.224505  |
| 52 | 6  | 0 | -0.982513 | -0.281388 | 2.533887  |
| 53 | 6  | 0 | 0.312007  | 0.139458  | 3.230717  |
| 54 | 1  | 0 | -0.970694 | 0.152675  | 1.527451  |
| 55 | 6  | 0 | -1.273681 | -1.775765 | 2.323429  |
| 56 | 16 | 0 | 1.831179  | -0.421363 | 2.347843  |
| 57 | 1  | 0 | 0.362312  | -0.281618 | 4.240465  |
| 58 | 1  | 0 | 0.304091  | 1.228193  | 3.309853  |
| 59 | 8  | 0 | -2.421502 | -2.143543 | 2.173662  |
| 60 | 8  | 0 | -0.250300 | -2.601399 | 2.253445  |
| 61 | 17 | 0 | -1.657495 | 2.904385  | 1.873169  |
| 62 | 1  | 0 | 0.616871  | -2.094987 | 2.285265  |
| 63 | 1  | 0 | 1.408807  | 6.131575  | -1.237419 |
| 64 | 1  | 0 | -2.098165 | 1.408327  | 2.924182  |
| 65 | 1  | 0 | -2.084686 | 0.271463  | 4.237714  |
| 66 | 1  | 0 | -3.058488 | -0.010873 | 2.915405  |

HF=-3453.6784924\ZeroPoint=0.4634052\Thermal=0.5053036

G = 4.9 kcal mol<sup>-1</sup>

| Center Number | Atomic Number | Atomic Type | Coordinates (Angstroms) |           |           |
|---------------|---------------|-------------|-------------------------|-----------|-----------|
|               |               |             | X                       | Y         | Z         |
| 1             | 46            | 0           | 1.413861                | 0.291872  | -0.053070 |
| 2             | 46            | 0           | -1.380622               | -0.655349 | -1.271220 |
| 3             | 7             | 0           | 2.102316                | -1.639630 | -0.388189 |
| 4             | 7             | 0           | 3.282239                | -2.023970 | -0.213116 |
| 5             | 6             | 0           | 4.262008                | -1.072886 | 0.123315  |
| 6             | 6             | 0           | 5.158320                | -1.419470 | 1.141029  |
| 7             | 6             | 0           | 6.146984                | -0.519962 | 1.516567  |
| 8             | 1             | 0           | 6.815922                | -0.767110 | 2.332268  |
| 9             | 6             | 0           | 6.284800                | 0.695352  | 0.841512  |
| 10            | 6             | 0           | 5.430106                | 1.010059  | -0.213554 |
| 11            | 1             | 0           | 5.558640                | 1.937575  | -0.759513 |
| 12            | 6             | 0           | 4.409816                | 0.135470  | -0.573731 |
| 13            | 1             | 0           | 3.765591                | 0.352140  | -1.416289 |
| 14            | 6             | 0           | 1.202995                | -2.646157 | -0.878419 |
| 15            | 6             | 0           | -0.178638               | -2.498249 | -0.636868 |
| 16            | 6             | 0           | -0.978361               | -3.583015 | -1.057503 |
| 17            | 1             | 0           | -2.038440               | -3.580524 | -0.830330 |
| 18            | 6             | 0           | -0.469647               | -4.681798 | -1.739801 |
| 19            | 1             | 0           | -1.131130               | -5.478980 | -2.060472 |
| 20            | 6             | 0           | 0.897003                | -4.749193 | -2.016123 |
| 21            | 1             | 0           | 1.305527                | -5.588060 | -2.567656 |
| 22            | 6             | 0           | 1.737613                | -3.740037 | -1.572002 |
| 23            | 1             | 0           | 2.802189                | -3.785122 | -1.758034 |
| 24            | 16            | 0           | -2.938910               | 0.756140  | -2.304883 |
| 25            | 6             | 0           | -4.352247               | 0.558371  | -1.123899 |
| 26            | 1             | 0           | -5.125075               | -0.079213 | -1.559463 |
| 27            | 1             | 0           | -4.776413               | 1.545094  | -0.931932 |



|                                                       |        |        |                         |           |           |    |    |   |           |           |           |
|-------------------------------------------------------|--------|--------|-------------------------|-----------|-----------|----|----|---|-----------|-----------|-----------|
| 28                                                    | 6      | 0      | -3.835056               | -0.030311 | 0.176714  | 12 | 6  | 0 | 4.383876  | -0.174911 | -0.529791 |
| 29                                                    | 1      | 0      | -3.140163               | 0.689265  | 0.613722  | 13 | 1  | 0 | 3.703304  | 0.088660  | -1.328308 |
| 30                                                    | 6      | 0      | -4.864322               | -0.335647 | 1.256298  | 14 | 6  | 0 | 1.008915  | -2.828816 | -0.506668 |
| 31                                                    | 8      | 0      | -6.073678               | -0.676281 | 0.794928  | 15 | 6  | 0 | -0.104571 | -2.968821 | 0.320799  |
| 32                                                    | 8      | 0      | -4.594704               | -0.321170 | 2.440742  | 16 | 6  | 0 | -1.074707 | -3.911773 | -0.010139 |
| 33                                                    | 7      | 0      | -3.073366               | -1.276829 | -0.132676 | 17 | 1  | 0 | -1.921487 | -4.029468 | 0.655601  |
| 34                                                    | 1      | 0      | -2.729084               | -1.748280 | 0.708947  | 18 | 6  | 0 | -0.944174 | -4.671207 | -1.171503 |
| 35                                                    | 1      | 0      | -3.661264               | -1.925565 | -0.652995 | 19 | 1  | 0 | -1.708780 | -5.392414 | -1.436984 |
| 36                                                    | 16     | 0      | 0.472283                | 0.452572  | -2.252283 | 20 | 6  | 0 | 0.171348  | -4.508857 | -1.997970 |
| 37                                                    | 6      | 0      | 0.076462                | 2.275888  | -2.178188 | 21 | 1  | 0 | 0.265600  | -5.092903 | -2.905796 |
| 38                                                    | 1      | 0      | 0.236138                | 2.689432  | -3.171901 | 22 | 6  | 0 | 1.165780  | -3.597369 | -1.662027 |
| 39                                                    | 1      | 0      | -0.972977               | 2.392105  | -1.911402 | 23 | 1  | 0 | 2.038037  | -3.456514 | -2.287746 |
| 40                                                    | 6      | 0      | 0.975298                | 2.967245  | -1.158590 | 24 | 16 | 0 | -2.519359 | 0.552388  | -2.846640 |
| 41                                                    | 1      | 0      | 2.019150                | 2.894567  | -1.484758 | 25 | 6  | 0 | -4.046849 | 0.384477  | -1.797997 |
| 42                                                    | 7      | 0      | 0.869242                | 2.286227  | 0.155143  | 26 | 1  | 0 | -4.682100 | -0.410436 | -2.194216 |
| 43                                                    | 1      | 0      | -0.102251               | 2.402357  | 0.507972  | 27 | 1  | 0 | -4.585755 | 1.332076  | -1.840931 |
| 44                                                    | 6      | 0      | 0.718025                | 4.466132  | -0.973425 | 28 | 6  | 0 | -3.626638 | 0.076238  | -0.365733 |
| 45                                                    | 8      | 0      | 0.174358                | 5.040442  | -2.062324 | 29 | 1  | 0 | -3.100315 | 0.946164  | 0.028998  |
| 46                                                    | 8      | 0      | 1.026623                | 5.066483  | 0.022531  | 30 | 6  | 0 | -4.765119 | -0.209743 | 0.603406  |
| 47                                                    | 1      | 0      | 7.068223                | 1.387272  | 1.128064  | 31 | 8  | 0 | -5.571536 | -1.200405 | 0.190865  |
| 48                                                    | 1      | 0      | 1.471933                | 2.751523  | 0.832158  | 32 | 8  | 0 | -4.915277 | 0.364393  | 1.659844  |
| 49                                                    | 1      | 0      | -6.644056               | -0.881703 | 1.553345  | 33 | 7  | 0 | -2.682280 | -1.072801 | -0.387848 |
| 50                                                    | 1      | 0      | 5.036131                | -2.368401 | 1.648195  | 34 | 1  | 0 | -2.454961 | -1.395776 | 0.592779  |
| 51                                                    | 7      | 0      | -1.998231               | 0.732845  | 3.223255  | 35 | 1  | 0 | -3.103800 | -1.861440 | -0.876219 |
| 52                                                    | 6      | 0      | -0.836945               | 0.056858  | 2.528515  | 36 | 16 | 0 | 0.977959  | 0.544423  | -2.240248 |
| 53                                                    | 6      | 0      | 0.447295                | 0.699077  | 3.048194  | 37 | 6  | 0 | 0.659766  | 2.373162  | -2.064357 |
| 54                                                    | 1      | 0      | -0.965066               | 0.274441  | 1.469154  | 38 | 1  | 0 | 1.042464  | 2.862684  | -2.957723 |
| 55                                                    | 6      | 0      | -0.965474               | -1.451256 | 2.815278  | 39 | 1  | 0 | -0.415641 | 2.533991  | -1.998257 |
| 56                                                    | 16     | 0      | 1.982508                | 0.113657  | 2.231390  | 40 | 6  | 0 | 1.365092  | 2.899803  | -0.821936 |
| 57                                                    | 1      | 0      | 0.562670                | 0.450876  | 4.107935  | 41 | 1  | 0 | 2.447680  | 2.775186  | -0.936061 |
| 58                                                    | 1      | 0      | 0.350906                | 1.784803  | 2.956613  | 42 | 7  | 0 | 0.944682  | 2.117862  | 0.369143  |
| 59                                                    | 8      | 0      | -1.091899               | -1.790300 | 3.978867  | 43 | 1  | 0 | -0.073738 | 2.307768  | 0.508539  |
| 60                                                    | 8      | 0      | -1.047668               | -2.249775 | 1.788638  | 44 | 6  | 0 | 1.160473  | 4.389609  | -0.520889 |
| 61                                                    | 17     | 0      | -2.067594               | 2.921225  | 1.197143  | 45 | 8  | 0 | 0.766218  | 5.091170  | -1.594966 |
| 62                                                    | 1      | 0      | -0.587692               | -2.054469 | 0.653078  | 46 | 8  | 0 | 1.396853  | 4.868965  | 0.557569  |
| 63                                                    | 1      | 0      | 0.053360                | 5.983398  | -1.869699 | 47 | 1  | 0 | 7.198745  | 0.920444  | 1.024628  |
| 64                                                    | 1      | 0      | -2.074766               | 1.704838  | 2.804366  | 48 | 1  | 0 | 1.420492  | 2.488766  | 1.190432  |
| 65                                                    | 1      | 0      | -1.849815               | 0.732873  | 4.232540  | 49 | 1  | 0 | -6.214672 | -1.382451 | 0.894244  |
| 66                                                    | 1      | 0      | -2.897995               | 0.261587  | 3.034507  | 50 | 1  | 0 | 5.039373  | -2.755949 | 1.594278  |
| -----                                                 |        |        |                         |           |           |    |    |   |           |           |           |
| HF=-3453.644023\ZeroPoint=0.4599046\Thermal=0.5017076 |        |        |                         |           |           |    |    |   |           |           |           |
| G = -14.6 kcal mol <sup>-1</sup>                      |        |        |                         |           |           |    |    |   |           |           |           |
| -----                                                 |        |        |                         |           |           |    |    |   |           |           |           |
| Center                                                | Atomic | Atomic | Coordinates (Angstroms) |           |           |    |    |   |           |           |           |
| Number                                                | Number | Type   | X                       | Y         | Z         |    |    |   |           |           |           |
| -----                                                 |        |        |                         |           |           |    |    |   |           |           |           |
| 1                                                     | 46     | 0      | 1.376860                | 0.111395  | 0.149719  | 51 | 7  | 0 | -2.474549 | 1.414889  | 2.911751  |
| 2                                                     | 46     | 0      | -0.991106               | -0.410708 | -1.420750 | 52 | 6  | 0 | -1.446728 | 0.377883  | 2.509519  |
| 3                                                     | 7      | 0      | 2.006662                | -1.855018 | -0.145214 | 53 | 6  | 0 | -0.089368 | 0.773461  | 3.087600  |
| 4                                                     | 7      | 0      | 3.174500                | -2.293102 | -0.118450 | 54 | 1  | 0 | -1.412337 | 0.416873  | 1.423501  |
| 5                                                     | 6      | 0      | 4.226817                | -1.387792 | 0.153477  | 55 | 6  | 0 | -1.998918 | -0.983346 | 3.044971  |
| 6                                                     | 6      | 0      | 5.166085                | -1.798083 | 1.104958  | 56 | 16 | 0 | 1.322075  | -0.240852 | 2.475022  |
| 7                                                     | 6      | 0      | 6.216819                | -0.950641 | 1.435407  | 57 | 1  | 0 | -0.104791 | 0.600425  | 4.167613  |
| 8                                                     | 1      | 0      | 6.925170                | -1.247429 | 2.199566  | 58 | 1  | 0 | 0.097268  | 1.837789  | 2.918308  |
| 9                                                     | 6      | 0      | 6.367627                | 0.270856  | 0.776276  | 59 | 8  | 0 | -2.166861 | -1.017768 | 4.267356  |
| 10                                                    | 6      | 0      | 5.464063                | 0.645032  | -0.217436 | 60 | 8  | 0 | -2.262057 | -1.853887 | 2.164700  |
| 11                                                    | 1      | 0      | 5.602885                | 1.575353  | -0.756114 | 61 | 17 | 0 | -1.930576 | 3.203365  | 0.538459  |
| -----                                                 |        |        |                         |           |           |    |    |   |           |           |           |
| HF=-3453.677894\ZeroPoint=0.4641482\Thermal=0.5064818 |        |        |                         |           |           |    |    |   |           |           |           |

G = -12.7 kcal mol<sup>-1</sup>

| Center Number | Atomic Number | Atomic Type | Coordinates (Angstroms) |           |           |
|---------------|---------------|-------------|-------------------------|-----------|-----------|
|               |               |             | X                       | Y         | Z         |
| 1             | 46            | 0           | 0.945533                | 0.648138  | 0.083389  |
| 2             | 46            | 0           | -1.653123               | 0.063203  | -1.280282 |
| 3             | 7             | 0           | 1.811833                | -0.803722 | -1.076411 |
| 4             | 7             | 0           | 3.018392                | -0.930299 | -1.362838 |
| 5             | 6             | 0           | 3.947135                | 0.053441  | -0.955341 |
| 6             | 6             | 0           | 5.130353                | -0.409061 | -0.368232 |
| 7             | 6             | 0           | 6.087909                | 0.510386  | 0.045472  |
| 8             | 1             | 0           | 6.986456                | 0.157222  | 0.537279  |
| 9             | 6             | 0           | 5.900237                | 1.874890  | -0.179553 |
| 10            | 6             | 0           | 4.746146                | 2.322937  | -0.822723 |
| 11            | 1             | 0           | 4.616313                | 3.378092  | -1.035272 |
| 12            | 6             | 0           | 3.759497                | 1.420072  | -1.205867 |
| 13            | 1             | 0           | 2.879892                | 1.756025  | -1.736391 |
| 14            | 6             | 0           | 0.930281                | -1.854980 | -1.530130 |
| 15            | 6             | 0           | -0.452266               | -1.602998 | -1.726930 |
| 16            | 6             | 0           | -1.161708               | -2.698667 | -2.265250 |
| 17            | 1             | 0           | -2.211177               | -2.581252 | -2.508808 |
| 18            | 6             | 0           | -0.589807               | -3.941712 | -2.508008 |
| 19            | 1             | 0           | -1.200362               | -4.744375 | -2.908205 |
| 20            | 6             | 0           | 0.759861                | -4.165815 | -2.217382 |
| 21            | 1             | 0           | 1.206237                | -5.142409 | -2.362516 |
| 22            | 6             | 0           | 1.524917                | -3.117406 | -1.745158 |
| 23            | 1             | 0           | 2.571588                | -3.252350 | -1.505761 |
| 24            | 16            | 0           | -3.153126               | 1.817624  | -0.671817 |
| 25            | 6             | 0           | -4.580555               | 0.787375  | -0.147782 |
| 26            | 1             | 0           | -5.214229               | 0.574579  | -1.014045 |
| 27            | 1             | 0           | -5.169382               | 1.341377  | 0.583968  |
| 28            | 6             | 0           | -4.066344               | -0.513088 | 0.466351  |
| 29            | 1             | 0           | -3.495202               | -0.290913 | 1.369262  |
| 30            | 6             | 0           | -5.222972               | -1.434366 | 0.816742  |
| 31            | 8             | 0           | -5.871111               | -1.019524 | 1.924816  |
| 32            | 8             | 0           | -5.561404               | -2.397919 | 0.172310  |
| 33            | 7             | 0           | -3.147120               | -1.200946 | -0.469758 |
| 34            | 1             | 0           | -2.646693               | -1.903007 | 0.095591  |
| 35            | 1             | 0           | -3.693680               | -1.682319 | -1.181640 |
| 36            | 16            | 0           | 0.055487                | 1.573597  | -1.893772 |
| 37            | 6             | 0           | -0.382408               | 3.247092  | -1.218444 |
| 38            | 1             | 0           | 0.175862                | 3.977025  | -1.802728 |
| 39            | 1             | 0           | -1.443366               | 3.414148  | -1.392862 |
| 40            | 6             | 0           | -0.022307               | 3.404815  | 0.271857  |
| 41            | 1             | 0           | 1.034731                | 3.682646  | 0.339408  |
| 42            | 7             | 0           | -0.179200               | 2.139976  | 1.026333  |
| 43            | 1             | 0           | -1.154044               | 1.809779  | 0.979829  |
| 44            | 6             | 0           | -0.792127               | 4.528110  | 0.965136  |
| 45            | 8             | 0           | -0.923226               | 5.606337  | 0.167969  |
| 46            | 8             | 0           | -1.184599               | 4.474863  | 2.100587  |
| 47            | 1             | 0           | 6.659001                | 2.584885  | 0.128748  |
| 48            | 1             | 0           | 0.011024                | 2.289492  | 2.015302  |
| 49            | 1             | 0           | -6.613156               | -1.624566 | 2.076087  |
| 50            | 1             | 0           | 5.252846                | -1.469911 | -0.194387 |
| 51            | 7             | 0           | 0.769307                | -2.933430 | 1.650467  |
| 52            | 6             | 0           | 0.239375                | -2.033372 | 2.735293  |
| 53            | 6             | 0           | 1.255747                | -1.028108 | 3.252155  |

|    |    |   |           |           |          |
|----|----|---|-----------|-----------|----------|
| 54 | 1  | 0 | -0.009946 | -2.688811 | 3.574631 |
| 55 | 6  | 0 | -1.107461 | -1.449899 | 2.201507 |
| 56 | 16 | 0 | 2.174695  | 0.008685  | 2.036558 |
| 57 | 1  | 0 | 2.046546  | -1.521982 | 3.819623 |
| 58 | 1  | 0 | 0.717874  | -0.335561 | 3.896970 |
| 59 | 8  | 0 | -1.340212 | -0.248063 | 2.398706 |
| 60 | 8  | 0 | -1.789147 | -2.329138 | 1.612850 |
| 61 | 1  | 0 | -1.399233 | 6.290153  | 0.664285 |
| 62 | 1  | 0 | 1.805031  | -3.169670 | 1.744074 |
| 63 | 1  | 0 | 0.665812  | -2.479738 | 0.737000 |
| 64 | 1  | 0 | 3.001454  | -1.049764 | 1.634952 |
| 65 | 1  | 0 | 0.177467  | -3.762140 | 1.594514 |
| 66 | 17 | 0 | 3.751922  | -2.980481 | 1.576349 |

HF=-3453.6704613\ZeroPoint=0.4585294\Thermal=0.5006846

G = 7.8 kcal mol<sup>-1</sup>

| Center Number | Atomic Number | Atomic Type | Coordinates (Angstroms) |           |           |
|---------------|---------------|-------------|-------------------------|-----------|-----------|
|               |               |             | X                       | Y         | Z         |
| 1             | 46            | 0           | 1.366698                | 0.530745  | -0.006062 |
| 2             | 46            | 0           | -1.770998               | -0.169615 | -0.923044 |
| 3             | 7             | 0           | 1.812822                | -1.275846 | -0.934723 |
| 4             | 7             | 0           | 2.963147                | -1.636764 | -1.267650 |
| 5             | 6             | 0           | 4.026087                | -0.728936 | -1.088295 |
| 6             | 6             | 0           | 5.162661                | -1.212351 | -0.430829 |
| 7             | 6             | 0           | 6.237625                | -0.358319 | -0.216611 |
| 8             | 1             | 0           | 7.103647                | -0.714686 | 0.328412  |
| 9             | 6             | 0           | 6.207074                | 0.949359  | -0.706166 |
| 10            | 6             | 0           | 5.094038                | 1.406649  | -1.410504 |
| 11            | 1             | 0           | 5.083586                | 2.410537  | -1.819425 |
| 12            | 6             | 0           | 3.992441                | 0.576728  | -1.597702 |
| 13            | 1             | 0           | 3.137198                | 0.909784  | -2.171425 |
| 14            | 6             | 0           | 0.765951                | -2.226248 | -1.185321 |
| 15            | 6             | 0           | -0.434968               | -2.087760 | -0.455348 |
| 16            | 6             | 0           | -1.334597               | -3.168861 | -0.593169 |
| 17            | 1             | 0           | -2.226794               | -3.194461 | 0.023172  |
| 18            | 6             | 0           | -1.120984               | -4.229675 | -1.464890 |
| 19            | 1             | 0           | -1.854873               | -5.023919 | -1.548149 |
| 20            | 6             | 0           | 0.043220                | -4.266378 | -2.237094 |
| 21            | 1             | 0           | 0.211697                | -5.075597 | -2.938020 |
| 22            | 6             | 0           | 1.000789                | -3.276790 | -2.081878 |
| 23            | 1             | 0           | 1.930265                | -3.313180 | -2.633705 |
| 24            | 16            | 0           | -3.306081               | 1.295658  | -1.882573 |
| 25            | 6             | 0           | -4.853436               | 0.555145  | -1.214552 |
| 26            | 1             | 0           | -5.211767               | -0.233496 | -1.882973 |
| 27            | 1             | 0           | -5.610178               | 1.339364  | -1.164093 |
| 28            | 6             | 0           | -4.576641               | -0.020494 | 0.170911  |
| 29            | 1             | 0           | -4.286734               | 0.774880  | 0.859253  |
| 30            | 6             | 0           | -5.806928               | -0.731708 | 0.716100  |
| 31            | 8             | 0           | -6.742282               | 0.144522  | 1.131249  |
| 32            | 8             | 0           | -5.955571               | -1.929347 | 0.740937  |
| 33            | 7             | 0           | -3.443681               | -0.968400 | 0.091819  |
| 34            | 1             | 0           | -3.084465               | -1.088654 | 1.053465  |
| 35            | 1             | 0           | -3.777445               | -1.856423 | -0.275965 |
| 36            | 16            | 0           | -0.014059               | 1.166871  | -1.808731 |
| 37            | 6             | 0           | -0.441891               | 2.870084  | -1.168881 |

|    |    |   |           |           |           |
|----|----|---|-----------|-----------|-----------|
| 38 | 1  | 0 | -0.565052 | 3.529711  | -2.024852 |
| 39 | 1  | 0 | -1.387227 | 2.808622  | -0.632843 |
| 40 | 6  | 0 | 0.667167  | 3.375911  | -0.250466 |
| 41 | 1  | 0 | 1.586341  | 3.501276  | -0.834042 |
| 42 | 7  | 0 | 0.929202  | 2.385672  | 0.811969  |
| 43 | 1  | 0 | 0.096641  | 2.201370  | 1.413638  |
| 44 | 6  | 0 | 0.364918  | 4.743350  | 0.360670  |
| 45 | 8  | 0 | -0.050326 | 5.623268  | -0.573975 |
| 46 | 8  | 0 | 0.518060  | 5.017544  | 1.521482  |
| 47 | 1  | 0 | 7.056113  | 1.604953  | -0.551080 |
| 48 | 1  | 0 | 1.666745  | 2.716298  | 1.430103  |
| 49 | 1  | 0 | -7.509398 | -0.361629 | 1.440018  |
| 50 | 1  | 0 | 5.159591  | -2.228037 | -0.055369 |
| 51 | 7  | 0 | -0.105819 | -1.903433 | 2.205996  |
| 52 | 6  | 0 | -0.102775 | -0.703877 | 3.090185  |
| 53 | 6  | 0 | 1.270859  | -0.047929 | 3.289335  |
| 54 | 1  | 0 | -0.419752 | -1.028542 | 4.088335  |
| 55 | 6  | 0 | -1.282594 | 0.195911  | 2.596535  |
| 56 | 16 | 0 | 2.544729  | -0.050595 | 1.948318  |
| 57 | 1  | 0 | 1.785866  | -0.535753 | 4.120576  |
| 58 | 1  | 0 | 1.087852  | 0.988161  | 3.574668  |
| 59 | 8  | 0 | -1.087480 | 1.406914  | 2.373004  |
| 60 | 8  | 0 | -2.357156 | -0.450521 | 2.501472  |
| 61 | 1  | 0 | -0.204707 | 6.474013  | -0.134878 |
| 62 | 1  | 0 | 0.717541  | -2.497953 | 2.324583  |
| 63 | 1  | 0 | -0.275325 | -1.716096 | 0.904335  |
| 64 | 1  | 0 | 2.814352  | -1.829279 | 1.837943  |
| 65 | 1  | 0 | -0.936555 | -2.447512 | 2.428796  |
| 66 | 17 | 0 | 2.938675  | -3.276893 | 1.813457  |

HF=-3453.6334399\ZeroPoint=0.4556058\Thermal=0.49765

G = -22.2 kcal mol<sup>-1</sup>

| Center Number | Atomic Number | Atomic Type | Coordinates (Angstroms) |           |           |
|---------------|---------------|-------------|-------------------------|-----------|-----------|
|               |               |             | X                       | Y         | Z         |
| 1             | 46            | 0           | 1.524800                | 0.347285  | 0.030744  |
| 2             | 46            | 0           | -1.861267               | 0.880404  | -0.278798 |
| 3             | 7             | 0           | 1.358609                | -1.443210 | -0.986107 |
| 4             | 7             | 0           | 2.225730                | -2.045396 | -1.644757 |
| 5             | 6             | 0           | 3.521833                | -1.475140 | -1.700727 |
| 6             | 6             | 0           | 4.591076                | -2.306521 | -1.357629 |
| 7             | 6             | 0           | 5.883614                | -1.795869 | -1.395641 |
| 8             | 1             | 0           | 6.714888                | -2.422242 | -1.094353 |
| 9             | 6             | 0           | 6.112167                | -0.487881 | -1.827799 |
| 10            | 6             | 0           | 5.042419                | 0.317405  | -2.216166 |
| 11            | 1             | 0           | 5.221553                | 1.323275  | -2.578645 |
| 12            | 6             | 0           | 3.738584                | -0.165691 | -2.144083 |
| 13            | 1             | 0           | 2.901691                | 0.440803  | -2.466147 |
| 14            | 6             | 0           | 0.040117                | -2.029825 | -1.038666 |
| 15            | 6             | 0           | -0.577720               | -2.386275 | 0.156281  |
| 16            | 6             | 0           | -1.859372               | -2.925728 | 0.105317  |
| 17            | 1             | 0           | -2.343694               | -3.219044 | 1.029129  |
| 18            | 6             | 0           | -2.519717               | -3.066308 | -1.116159 |
| 19            | 1             | 0           | -3.526888               | -3.467247 | -1.140270 |
| 20            | 6             | 0           | -1.890000               | -2.683558 | -2.300782 |
| 21            | 1             | 0           | -2.406188               | -2.771382 | -3.249244 |

|    |    |   |           |           |           |
|----|----|---|-----------|-----------|-----------|
| 22 | 6  | 0 | -0.594680 | -2.176757 | -2.269691 |
| 23 | 1  | 0 | -0.092835 | -1.863489 | -3.176306 |
| 24 | 16 | 0 | -3.046334 | 1.066006  | -2.242892 |
| 25 | 6  | 0 | -4.520854 | 0.085662  | -1.741542 |
| 26 | 1  | 0 | -4.326880 | -0.978798 | -1.898398 |
| 27 | 1  | 0 | -5.361448 | 0.386124  | -2.369173 |
| 28 | 6  | 0 | -4.840237 | 0.325794  | -0.262003 |
| 29 | 1  | 0 | -5.129679 | 1.367331  | -0.118171 |
| 30 | 6  | 0 | -5.976654 | -0.592577 | 0.165885  |
| 31 | 8  | 0 | -7.182188 | -0.063543 | -0.135112 |
| 32 | 8  | 0 | -5.830510 | -1.680043 | 0.664823  |
| 33 | 7  | 0 | -3.624288 | 0.053918  | 0.528447  |
| 34 | 1  | 0 | -3.704131 | 0.306039  | 1.511776  |
| 35 | 1  | 0 | -3.437187 | -0.949362 | 0.553559  |
| 36 | 16 | 0 | 0.080113  | 1.569092  | -1.470559 |
| 37 | 6  | 0 | 0.368804  | 3.281965  | -0.806332 |
| 38 | 1  | 0 | 0.461498  | 3.966897  | -1.647332 |
| 39 | 1  | 0 | -0.503359 | 3.570263  | -0.218992 |
| 40 | 6  | 0 | 1.633193  | 3.327541  | 0.056129  |
| 41 | 1  | 0 | 2.510530  | 3.230528  | -0.589371 |
| 42 | 7  | 0 | 1.628580  | 2.196849  | 0.997795  |
| 43 | 1  | 0 | 0.762009  | 2.161386  | 1.547586  |
| 44 | 6  | 0 | 1.750462  | 4.652134  | 0.802999  |
| 45 | 8  | 0 | 1.850259  | 5.687226  | -0.055719 |
| 46 | 8  | 0 | 1.756286  | 4.766711  | 2.001181  |
| 47 | 1  | 0 | 7.124197  | -0.102412 | -1.873412 |
| 48 | 1  | 0 | 2.416126  | 2.251590  | 1.639077  |
| 49 | 1  | 0 | -7.860843 | -0.712713 | 0.106605  |
| 50 | 1  | 0 | 4.387627  | -3.315555 | -1.021719 |
| 51 | 7  | 0 | 0.119451  | -2.056291 | 3.388330  |
| 52 | 6  | 0 | 0.120820  | -0.592516 | 3.452027  |
| 53 | 6  | 0 | 1.541785  | -0.041018 | 3.278417  |
| 54 | 1  | 0 | -0.197301 | -0.217540 | 4.442716  |
| 55 | 6  | 0 | -1.013028 | -0.103957 | 2.507337  |
| 56 | 16 | 0 | 2.615819  | -0.610381 | 1.878108  |
| 57 | 1  | 0 | 2.118315  | -0.331032 | 4.163148  |
| 58 | 1  | 0 | 1.501653  | 1.048833  | 3.297330  |
| 59 | 8  | 0 | -0.765656 | 0.835659  | 1.659292  |
| 60 | 8  | 0 | -2.100859 | -0.670130 | 2.652548  |
| 61 | 1  | 0 | 1.915041  | 6.504360  | 0.462500  |
| 62 | 1  | 0 | 0.785524  | -2.458714 | 4.039065  |
| 63 | 1  | 0 | -0.064958 | -2.279027 | 1.105195  |
| 64 | 1  | 0 | 2.427096  | -2.701626 | 1.635561  |
| 65 | 1  | 0 | -0.807137 | -2.402812 | 3.612902  |
| 66 | 17 | 0 | 2.500458  | -4.008646 | 1.335661  |

HF=-3453.6784948\ZeroPoint=0.4557868\Thermal=0.4992706

G = -5.4 kcal mol<sup>-1</sup>

| Center Number | Atomic Number | Atomic Type | Coordinates (Angstroms) |           |           |
|---------------|---------------|-------------|-------------------------|-----------|-----------|
|               |               |             | X                       | Y         | Z         |
| 1             | 46            | 0           | 1.355115                | 0.387599  | 0.090358  |
| 2             | 46            | 0           | -1.497284               | 0.181276  | -1.281931 |
| 3             | 7             | 0           | 1.712834                | -1.427010 | -0.877642 |
| 4             | 7             | 0           | 2.870539                | -1.880818 | -1.026324 |
| 5             | 6             | 0           | 3.970796                | -1.083478 | -0.641608 |

|    |    |   |           |           |           |
|----|----|---|-----------|-----------|-----------|
| 6  | 6  | 0 | 4.923499  | -1.669488 | 0.198103  |
| 7  | 6  | 0 | 6.032591  | -0.931099 | 0.598793  |
| 8  | 1  | 0 | 6.754779  | -1.373252 | 1.274998  |
| 9  | 6  | 0 | 6.223468  | 0.365821  | 0.119927  |
| 10 | 6  | 0 | 5.302214  | 0.922190  | -0.767591 |
| 11 | 1  | 0 | 5.468596  | 1.914315  | -1.171753 |
| 12 | 6  | 0 | 4.170003  | 0.208135  | -1.148981 |
| 13 | 1  | 0 | 3.467824  | 0.620297  | -1.861396 |
| 14 | 6  | 0 | 0.639964  | -2.259117 | -1.337679 |
| 15 | 6  | 0 | -0.652871 | -1.717921 | -1.515348 |
| 16 | 6  | 0 | -1.591867 | -2.619788 | -2.066386 |
| 17 | 1  | 0 | -2.588463 | -2.267903 | -2.309074 |
| 18 | 6  | 0 | -1.305344 | -3.947746 | -2.348684 |
| 19 | 1  | 0 | -2.077681 | -4.590356 | -2.758369 |
| 20 | 6  | 0 | -0.028542 | -4.458926 | -2.091287 |
| 21 | 1  | 0 | 0.196747  | -5.503975 | -2.266024 |
| 22 | 6  | 0 | 0.941595  | -3.614052 | -1.601247 |
| 23 | 1  | 0 | 1.934708  | -3.981599 | -1.387507 |
| 24 | 16 | 0 | -2.855177 | 2.134184  | -1.437234 |
| 25 | 6  | 0 | -4.406510 | 1.427990  | -0.746567 |
| 26 | 1  | 0 | -5.008749 | 0.984441  | -1.547285 |
| 27 | 1  | 0 | -4.984381 | 2.230182  | -0.287704 |
| 28 | 6  | 0 | -4.075589 | 0.373099  | 0.308704  |
| 29 | 1  | 0 | -3.523875 | 0.853587  | 1.122845  |
| 30 | 6  | 0 | -5.325670 | -0.285024 | 0.863576  |
| 31 | 8  | 0 | -6.085933 | 0.588437  | 1.552105  |
| 32 | 8  | 0 | -5.627256 | -1.445282 | 0.704093  |
| 33 | 7  | 0 | -3.187862 | -0.660651 | -0.283728 |
| 34 | 1  | 0 | -2.855341 | -1.278126 | 0.456744  |
| 35 | 1  | 0 | -3.741243 | -1.253961 | -0.900132 |
| 36 | 16 | 0 | 0.496921  | 1.270839  | -1.898763 |
| 37 | 6  | 0 | 0.323422  | 3.044536  | -1.353486 |
| 38 | 1  | 0 | 0.596124  | 3.675510  | -2.196985 |
| 39 | 1  | 0 | -0.718084 | 3.224953  | -1.087271 |
| 40 | 6  | 0 | 1.234042  | 3.315566  | -0.161411 |
| 41 | 1  | 0 | 2.279360  | 3.250645  | -0.486187 |
| 42 | 7  | 0 | 1.024051  | 2.287290  | 0.881466  |
| 43 | 1  | 0 | 0.038711  | 2.243439  | 1.231756  |
| 44 | 6  | 0 | 1.080370  | 4.713240  | 0.439596  |
| 45 | 8  | 0 | 0.906111  | 5.652844  | -0.509853 |
| 46 | 8  | 0 | 1.162426  | 4.949136  | 1.616034  |
| 47 | 1  | 0 | 7.097091  | 0.931911  | 0.420952  |
| 48 | 1  | 0 | 1.581040  | 2.515624  | 1.703347  |
| 49 | 1  | 0 | -6.871017 | 0.114675  | 1.866158  |
| 50 | 1  | 0 | 4.769269  | -2.685225 | 0.543195  |
| 51 | 7  | 0 | -1.778888 | -1.803050 | 2.618440  |
| 52 | 6  | 0 | -0.394469 | -1.774839 | 2.140086  |
| 53 | 6  | 0 | 0.600301  | -1.089122 | 3.083663  |
| 54 | 1  | 0 | -0.421796 | -1.190397 | 1.212761  |
| 55 | 6  | 0 | 0.059425  | -3.178336 | 1.730383  |
| 56 | 16 | 0 | 2.129190  | -0.483944 | 2.236155  |
| 57 | 1  | 0 | 0.931147  | -1.742882 | 3.892583  |
| 58 | 1  | 0 | 0.136204  | -0.186153 | 3.478972  |
| 59 | 8  | 0 | 1.219982  | -3.515195 | 1.672774  |
| 60 | 8  | 0 | -0.935750 | -4.006910 | 1.403579  |
| 61 | 17 | 0 | -1.522389 | 1.440016  | 2.409193  |
| 62 | 1  | 0 | -1.767610 | -3.518385 | 1.573042  |
| 63 | 1  | 0 | 0.840398  | 6.514499  | -0.069393 |

|    |   |   |           |           |          |
|----|---|---|-----------|-----------|----------|
| 64 | 1 | 0 | -2.092935 | -0.828286 | 2.680941 |
| 65 | 1 | 0 | -1.843510 | -2.197842 | 3.554125 |
| 66 | 1 | 0 | 2.561813  | -1.705950 | 1.859539 |

HF=-3453.6592879\ZeroPoint=0.4609749\Thermal=0.5037983

G = 14.8 kcal mol<sup>-1</sup>

| Center Number | Atomic Number | Atomic Type | Coordinates (Angstroms) |           |           |
|---------------|---------------|-------------|-------------------------|-----------|-----------|
|               |               |             | X                       | Y         | Z         |
| 1             | 46            | 0           | 1.410644                | 0.462255  | -0.161513 |
| 2             | 46            | 0           | -1.579671               | -0.535844 | -1.014912 |
| 3             | 7             | 0           | 1.985898                | -1.502351 | -0.642187 |
| 4             | 7             | 0           | 3.141571                | -1.966839 | -0.489721 |
| 5             | 6             | 0           | 4.172207                | -1.128297 | -0.027918 |
| 6             | 6             | 0           | 5.003165                | -1.645406 | 0.974287  |
| 7             | 6             | 0           | 6.038576                | -0.864998 | 1.473329  |
| 8             | 1             | 0           | 6.659406                | -1.246799 | 2.274949  |
| 9             | 6             | 0           | 6.287112                | 0.400487  | 0.936357  |
| 10            | 6             | 0           | 5.497923                | 0.885336  | -0.105887 |
| 11            | 1             | 0           | 5.711971                | 1.852476  | -0.545553 |
| 12            | 6             | 0           | 4.434641                | 0.129806  | -0.590656 |
| 13            | 1             | 0           | 3.838552                | 0.481419  | -1.423682 |
| 14            | 6             | 0           | 1.076065                | -2.402680 | -1.297678 |
| 15            | 6             | 0           | -0.287579               | -2.389929 | -0.940895 |
| 16            | 6             | 0           | -1.084690               | -3.383700 | -1.543096 |
| 17            | 1             | 0           | -2.121251               | -3.480239 | -1.240828 |
| 18            | 6             | 0           | -0.590504               | -4.255719 | -2.506192 |
| 19            | 1             | 0           | -1.247089               | -4.984933 | -2.967318 |
| 20            | 6             | 0           | 0.752999                | -4.186484 | -2.882223 |
| 21            | 1             | 0           | 1.143352                | -4.846357 | -3.648100 |
| 22            | 6             | 0           | 1.594992                | -3.274661 | -2.262846 |
| 23            | 1             | 0           | 2.643345                | -3.221376 | -2.526119 |
| 24            | 16            | 0           | -3.247437               | 0.878735  | -1.810973 |
| 25            | 6             | 0           | -4.613297               | 0.370071  | -0.681940 |
| 26            | 1             | 0           | -5.220355               | -0.406846 | -1.156891 |
| 27            | 1             | 0           | -5.240492               | 1.242583  | -0.496310 |
| 28            | 6             | 0           | -4.030264               | -0.139417 | 0.633441  |
| 29            | 1             | 0           | -3.505330               | 0.680201  | 1.127503  |
| 30            | 6             | 0           | -5.126890               | -0.679041 | 1.536165  |
| 31            | 8             | 0           | -5.820354               | 0.314399  | 2.124324  |
| 32            | 8             | 0           | -5.379820               | -1.850263 | 1.683319  |
| 33            | 7             | 0           | -3.043230               | -1.213573 | 0.351595  |
| 34            | 1             | 0           | -2.575343               | -1.464693 | 1.231235  |
| 35            | 1             | 0           | -3.539323               | -2.049432 | 0.043551  |
| 36            | 16            | 0           | 0.160233                | 0.634234  | -2.151107 |
| 37            | 6             | 0           | -0.296776               | 2.437100  | -2.010670 |
| 38            | 1             | 0           | -0.365040               | 2.838171  | -3.019812 |
| 39            | 1             | 0           | -1.265492               | 2.512442  | -1.517985 |
| 40            | 6             | 0           | 0.769311                | 3.155180  | -1.201225 |
| 41            | 1             | 0           | 1.727320                | 3.120226  | -1.733131 |
| 42            | 7             | 0           | 0.931234                | 2.460884  | 0.099929  |
| 43            | 1             | 0           | 0.001779                | 2.501756  | 0.620823  |
| 44            | 6             | 0           | 0.505575                | 4.640887  | -0.937836 |
| 45            | 8             | 0           | -0.275123               | 5.204557  | -1.873656 |
| 46            | 8             | 0           | 1.001814                | 5.236264  | -0.016839 |
| 47            | 1             | 0           | 7.105998                | 0.998720  | 1.318076  |

|    |    |   |           |           |           |    |    |   |           |           |           |
|----|----|---|-----------|-----------|-----------|----|----|---|-----------|-----------|-----------|
| 48 | 1  | 0 | 1.600656  | 2.978066  | 0.668989  | 32 | 8  | 0 | 6.260727  | -0.780877 | -1.337366 |
| 49 | 1  | 0 | -6.524358 | -0.088483 | 2.655287  | 33 | 7  | 0 | 2.998161  | -1.966551 | -0.313710 |
| 50 | 1  | 0 | 4.800167  | -2.634135 | 1.367929  | 34 | 1  | 0 | 3.141360  | -2.924959 | -0.004441 |
| 51 | 7  | 0 | -1.750018 | -0.342476 | 3.079908  | 35 | 1  | 0 | 3.087067  | -1.380856 | 0.540343  |
| 52 | 6  | 0 | -0.429541 | -0.437327 | 2.461240  | 36 | 16 | 0 | -1.231182 | -1.056658 | -1.478683 |
| 53 | 6  | 0 | 0.619215  | 0.477617  | 3.094972  | 37 | 6  | 0 | -2.337204 | -2.372234 | -0.774617 |
| 54 | 1  | 0 | -0.564729 | -0.107746 | 1.424611  | 38 | 1  | 0 | -3.114178 | -2.581512 | -1.507559 |
| 55 | 6  | 0 | 0.014781  | -1.915040 | 2.440647  | 39 | 1  | 0 | -1.739250 | -3.267834 | -0.618591 |
| 56 | 16 | 0 | 2.222575  | 0.459036  | 2.152458  | 40 | 6  | 0 | -2.976904 | -1.903897 | 0.538517  |
| 57 | 1  | 0 | 0.869563  | 0.168795  | 4.109880  | 41 | 1  | 0 | -3.757372 | -1.173009 | 0.302862  |
| 58 | 1  | 0 | 0.273432  | 1.511722  | 3.072572  | 42 | 7  | 0 | -1.969864 | -1.234812 | 1.390037  |
| 59 | 8  | 0 | 0.889571  | -2.300541 | 3.211578  | 43 | 1  | 0 | -1.180673 | -1.882663 | 1.546632  |
| 60 | 8  | 0 | -0.606759 | -2.660298 | 1.580724  | 44 | 6  | 0 | -3.658501 | -3.026821 | 1.313341  |
| 61 | 17 | 0 | -1.736066 | 2.594885  | 1.493955  | 45 | 8  | 0 | -4.448744 | -3.770291 | 0.511836  |
| 62 | 1  | 0 | -0.543619 | -2.257513 | 0.374061  | 46 | 8  | 0 | -3.542590 | -3.206850 | 2.497492  |
| 63 | 1  | 0 | -0.394859 | 6.138804  | -1.641125 | 47 | 1  | 0 | -6.624830 | 0.123224  | -1.291347 |
| 64 | 1  | 0 | -2.060497 | 0.628512  | 3.044512  | 48 | 1  | 0 | -2.366824 | -0.996957 | 2.297238  |
| 65 | 1  | 0 | -1.735622 | -0.659631 | 4.044423  | 49 | 1  | 0 | 6.539009  | -2.122773 | 0.524986  |
| 66 | 1  | 0 | 2.475369  | -0.850966 | 2.370201  | 50 | 1  | 0 | -3.576785 | 2.283351  | 0.835195  |

HF=-3453.6224261\ZeroPoint=0.4560889\Thermal=0.4984812

G = -37.3 kcal mol<sup>-1</sup>

| Center Number | Atomic Number | Atomic Type | Coordinates (Angstroms) |           |           |
|---------------|---------------|-------------|-------------------------|-----------|-----------|
|               |               |             | X                       | Y         | Z         |
| 1             | 46            | 0           | -1.294761               | 0.462462  | 0.393166  |
| 2             | 46            | 0           | 0.980336                | -1.700381 | -0.865243 |
| 3             | 7             | 0           | -1.083348               | 2.248351  | -0.673859 |
| 4             | 7             | 0           | -2.033723               | 2.739846  | -1.318898 |
| 5             | 6             | 0           | -3.264972               | 2.028428  | -1.283156 |
| 6             | 6             | 0           | -3.966552               | 1.863477  | -0.083460 |
| 7             | 6             | 0           | -5.183528               | 1.185084  | -0.096343 |
| 8             | 1             | 0           | -5.738619               | 1.068576  | 0.827535  |
| 9             | 6             | 0           | -5.683833               | 0.660922  | -1.288161 |
| 10            | 6             | 0           | -4.982246               | 0.847054  | -2.480674 |
| 11            | 1             | 0           | -5.371937               | 0.446304  | -3.408972 |
| 12            | 6             | 0           | -3.784571               | 1.555335  | -2.488396 |
| 13            | 1             | 0           | -3.228872               | 1.709088  | -3.404933 |
| 14            | 6             | 0           | 0.092989                | 3.070581  | -0.621287 |
| 15            | 6             | 0           | 1.334550                | 2.472840  | -0.820728 |
| 16            | 6             | 0           | 2.475942                | 3.265829  | -0.779647 |
| 17            | 1             | 0           | 3.448270                | 2.819297  | -0.946990 |
| 18            | 6             | 0           | 2.375816                | 4.628402  | -0.504064 |
| 19            | 1             | 0           | 3.272686                | 5.232560  | -0.437920 |
| 20            | 6             | 0           | 1.126549                | 5.211385  | -0.291651 |
| 21            | 1             | 0           | 1.050325                | 6.267042  | -0.059997 |
| 22            | 6             | 0           | -0.025914               | 4.437399  | -0.361914 |
| 23            | 1             | 0           | -1.004707               | 4.868187  | -0.194182 |
| 24            | 16            | 0           | 1.800269                | -0.551603 | -2.703512 |
| 25            | 6             | 0           | 3.502207                | -0.306482 | -2.040244 |
| 26            | 1             | 0           | 3.525700                | 0.514722  | -1.318270 |
| 27            | 1             | 0           | 4.163060                | -0.044982 | -2.866069 |
| 28            | 6             | 0           | 3.975465                | -1.584800 | -1.360337 |
| 29            | 1             | 0           | 3.990162                | -2.387131 | -2.105636 |
| 30            | 6             | 0           | 5.404649                | -1.459589 | -0.833994 |
| 31            | 8             | 0           | 5.615983                | -2.239820 | 0.252258  |

|    |    |   |           |           |           |
|----|----|---|-----------|-----------|-----------|
| 51 | 7  | 0 | 2.607854  | -0.628429 | 2.291457  |
| 52 | 6  | 0 | 1.709455  | 0.521184  | 2.174578  |
| 53 | 6  | 0 | 0.441166  | 0.433798  | 3.063850  |
| 54 | 1  | 0 | 1.358727  | 0.566604  | 1.137033  |
| 55 | 6  | 0 | 2.502216  | 1.810619  | 2.431130  |
| 56 | 16 | 0 | -0.948235 | 1.527180  | 2.491406  |
| 57 | 1  | 0 | 0.663003  | 0.714485  | 4.097209  |
| 58 | 1  | 0 | 0.100617  | -0.602316 | 3.069911  |
| 59 | 8  | 0 | 1.803749  | 2.951407  | 2.392740  |
| 60 | 8  | 0 | 3.687130  | 1.812500  | 2.658545  |
| 61 | 17 | 0 | 0.470255  | -3.123394 | 1.064271  |
| 62 | 1  | 0 | 1.383909  | 1.420038  | -1.065370 |
| 63 | 1  | 0 | -4.867258 | -4.454302 | 1.057206  |
| 64 | 1  | 0 | 2.093336  | -1.467379 | 2.543999  |
| 65 | 1  | 0 | 3.341199  | -0.447889 | 2.969697  |
| 66 | 1  | 0 | 0.844201  | 2.771894  | 2.250321  |

HF=-3453.711004\ZeroPoint=0.4627975\Thermal=0.505474

G = -3.0 kcal mol<sup>-1</sup>

| Center Number | Atomic Number | Atomic Type | Coordinates (Angstroms) |           |           |
|---------------|---------------|-------------|-------------------------|-----------|-----------|
|               |               |             | X                       | Y         | Z         |
| 1             | 46            | 0           | -1.459651               | -0.290389 | 0.341131  |
| 2             | 46            | 0           | 1.581705                | -0.812302 | -1.142679 |
| 3             | 7             | 0           | -1.792656               | 0.063494  | -1.651415 |
| 4             | 7             | 0           | -2.692900               | -0.351048 | -2.407558 |
| 5             | 6             | 0           | -3.723951               | -1.144826 | -1.863283 |
| 6             | 6             | 0           | -4.380846               | -0.825685 | -0.665182 |
| 7             | 6             | 0           | -5.414293               | -1.648610 | -0.225950 |
| 8             | 1             | 0           | -5.941677               | -1.396202 | 0.686716  |
| 9             | 6             | 0           | -5.780022               | -2.778682 | -0.956890 |
| 10            | 6             | 0           | -5.135117               | -3.074719 | -2.160104 |
| 11            | 1             | 0           | -5.428922               | -3.944299 | -2.736014 |
| 12            | 6             | 0           | -4.126967               | -2.243626 | -2.631898 |
| 13            | 1             | 0           | -3.625172               | -2.442778 | -3.570970 |
| 14            | 6             | 0           | -0.855521               | 1.002924  | -2.199941 |
| 15            | 6             | 0           | 0.528292                | 0.870020  | -1.921818 |

|    |    |   |           |           |           |    |    |   |           |           |           |
|----|----|---|-----------|-----------|-----------|----|----|---|-----------|-----------|-----------|
| 16 | 6  | 0 | 1.291592  | 1.942374  | -2.437232 |    |    |   |           |           |           |
| 17 | 1  | 0 | 2.365609  | 1.960095  | -2.309533 | 1  | 46 | 0 | 1.529485  | 0.121138  | 0.318402  |
| 18 | 6  | 0 | 0.752511  | 3.026113  | -3.129823 | 2  | 46 | 0 | -1.407666 | 0.643578  | -1.059711 |
| 19 | 1  | 0 | 1.408638  | 3.818356  | -3.475163 | 3  | 7  | 0 | 1.883309  | -0.664254 | -1.575472 |
| 20 | 6  | 0 | -0.617738 | 3.095371  | -3.378778 | 4  | 7  | 0 | 2.861788  | -0.414604 | -2.313215 |
| 21 | 1  | 0 | -1.048809 | 3.935967  | -3.908953 | 5  | 6  | 0 | 3.970552  | 0.266000  | -1.777928 |
| 22 | 6  | 0 | -1.423302 | 2.068031  | -2.918024 | 6  | 6  | 0 | 4.526530  | -0.038273 | -0.524745 |
| 23 | 1  | 0 | -2.495829 | 2.088410  | -3.067739 | 7  | 6  | 0 | 5.652432  | 0.661512  | -0.102789 |
| 24 | 16 | 0 | 2.970528  | -2.717569 | -0.757015 | 8  | 1  | 0 | 6.100424  | 0.416443  | 0.853275  |
| 25 | 6  | 0 | 4.599824  | -1.865699 | -0.835047 | 9  | 6  | 0 | 6.210538  | 1.659761  | -0.902697 |
| 26 | 1  | 0 | 4.955555  | -1.818157 | -1.869729 | 10 | 6  | 0 | 5.664086  | 1.940022  | -2.156817 |
| 27 | 1  | 0 | 5.323167  | -2.434119 | -0.249706 | 11 | 1  | 0 | 6.106061  | 2.703778  | -2.785767 |
| 28 | 6  | 0 | 4.467135  | -0.454210 | -0.268497 | 12 | 6  | 0 | 4.562744  | 1.224546  | -2.610391 |
| 29 | 1  | 0 | 4.148605  | -0.504179 | 0.774427  | 13 | 1  | 0 | 4.133595  | 1.411168  | -3.587329 |
| 30 | 6  | 0 | 5.783342  | 0.304861  | -0.351728 | 14 | 6  | 0 | 0.829831  | -1.452184 | -2.146256 |
| 31 | 8  | 0 | 6.691517  | -0.182365 | 0.515427  | 15 | 6  | 0 | -0.401732 | -1.501278 | -1.457542 |
| 32 | 8  | 0 | 6.010321  | 1.213534  | -1.114699 | 16 | 6  | 0 | -1.370953 | -2.359219 | -2.020791 |
| 33 | 7  | 0 | 3.417083  | 0.280242  | -1.015348 | 17 | 1  | 0 | -2.311152 | -2.509513 | -1.499279 |
| 34 | 1  | 0 | 3.164908  | 1.107259  | -0.475873 | 18 | 6  | 0 | -1.163503 | -3.065497 | -3.198436 |
| 35 | 1  | 0 | 3.803749  | 0.592405  | -1.904531 | 19 | 1  | 0 | -1.940029 | -3.712505 | -3.591565 |
| 36 | 16 | 0 | -0.261859 | -2.113628 | -0.368180 | 20 | 6  | 0 | 0.062705  | -2.957845 | -3.862257 |
| 37 | 6  | 0 | 0.363153  | -2.661655 | 1.307010  | 21 | 1  | 0 | 0.240891  | -3.512505 | -4.776085 |
| 38 | 1  | 0 | 0.476297  | -3.742722 | 1.278814  | 22 | 6  | 0 | 1.066964  | -2.165835 | -3.329744 |
| 39 | 1  | 0 | 1.337280  | -2.208219 | 1.477176  | 23 | 1  | 0 | 2.035369  | -2.100706 | -3.807340 |
| 40 | 6  | 0 | -0.630376 | -2.233087 | 2.381584  | 24 | 16 | 0 | -2.541076 | 2.634917  | -1.459556 |
| 41 | 1  | 0 | -1.592068 | -2.729937 | 2.214998  | 25 | 6  | 0 | -4.259049 | 1.970006  | -1.419400 |
| 42 | 7  | 0 | -0.838563 | -0.769071 | 2.278281  | 26 | 1  | 0 | -4.552981 | 1.626214  | -2.416066 |
| 43 | 1  | 0 | 0.072430  | -0.288162 | 2.394575  | 27 | 1  | 0 | -4.926711 | 2.779017  | -1.120824 |
| 44 | 6  | 0 | -0.191393 | -2.601908 | 3.797173  | 28 | 6  | 0 | -4.344698 | 0.820301  | -0.420652 |
| 45 | 8  | 0 | 0.195729  | -3.888395 | 3.877987  | 29 | 1  | 0 | -4.090163 | 1.176250  | 0.580393  |
| 46 | 8  | 0 | -0.229174 | -1.845867 | 4.732736  | 30 | 6  | 0 | -5.735682 | 0.203988  | -0.397871 |
| 47 | 1  | 0 | -6.581323 | -3.416832 | -0.602328 | 31 | 8  | 0 | -6.638937 | 1.043171  | 0.141024  |
| 48 | 1  | 0 | -1.449167 | -0.445596 | 3.026048  | 32 | 8  | 0 | -6.009808 | -0.889882 | -0.829529 |
| 49 | 1  | 0 | 7.512785  | 0.320037  | 0.401530  | 33 | 7  | 0 | -3.342133 | -0.214044 | -0.781809 |
| 50 | 1  | 0 | -4.127854 | 0.078617  | -0.125283 | 34 | 1  | 0 | -3.239032 | -0.838608 | 0.017304  |
| 51 | 7  | 0 | 0.016656  | 2.650410  | 0.688411  | 35 | 1  | 0 | -3.691950 | -0.765110 | -1.563998 |
| 52 | 6  | 0 | -0.903466 | 2.810994  | 1.860927  | 36 | 16 | 0 | 0.562095  | 1.927293  | -0.751275 |
| 53 | 1  | 0 | 0.907065  | 2.169732  | 1.027954  | 37 | 6  | 0 | 0.096700  | 2.918460  | 0.764883  |
| 54 | 1  | 0 | 0.189985  | 3.563806  | 0.253587  | 38 | 1  | 0 | 0.186447  | 3.972124  | 0.511635  |
| 55 | 6  | 0 | -0.672966 | 4.167433  | 2.522118  | 39 | 1  | 0 | -0.936402 | 2.691209  | 1.020131  |
| 56 | 1  | 0 | -0.599604 | 2.034269  | 2.568245  | 40 | 6  | 0 | 1.031124  | 2.544436  | 1.911788  |
| 57 | 6  | 0 | -2.381257 | 2.531852  | 1.463841  | 41 | 1  | 0 | 2.054993  | 2.843472  | 1.661597  |
| 58 | 16 | 0 | -0.831872 | 5.596731  | 1.371604  | 42 | 7  | 0 | 1.009306  | 1.073548  | 2.092568  |
| 59 | 1  | 0 | 0.341057  | 4.220100  | 2.923702  | 43 | 1  | 0 | 0.029091  | 0.786566  | 2.299089  |
| 60 | 1  | 0 | -1.382235 | 4.284774  | 3.338349  | 44 | 6  | 0 | 0.703096  | 3.234700  | 3.235770  |
| 61 | 8  | 0 | -2.596266 | 1.431681  | 0.827221  | 45 | 8  | 0 | 0.358924  | 4.524557  | 3.060407  |
| 62 | 8  | 0 | -3.238874 | 3.339316  | 1.790137  | 46 | 8  | 0 | 0.795408  | 2.699473  | 4.309033  |
| 63 | 1  | 0 | -2.141592 | 5.390494  | 1.117542  | 47 | 1  | 0 | 7.083301  | 2.203587  | -0.559685 |
| 64 | 17 | 0 | 1.998077  | 0.878836  | 2.021355  | 48 | 1  | 0 | 1.581261  | 0.808234  | 2.892350  |
| 65 | 1  | 0 | -0.370810 | 2.028636  | -0.027953 | 49 | 1  | 0 | -7.505311 | 0.608413  | 0.117745  |
| 66 | 1  | 0 | 0.442202  | -4.071753 | 4.797886  | 50 | 1  | 0 | 4.114617  | -0.839010 | 0.077672  |
|    |    |   |           |           |           | 51 | 7  | 0 | -0.657344 | -2.189861 | 1.132303  |
|    |    |   |           |           |           | 52 | 6  | 0 | 0.324871  | -2.368386 | 2.231454  |
|    |    |   |           |           |           | 53 | 1  | 0 | -1.401994 | -1.569728 | 1.496009  |
|    |    |   |           |           |           | 54 | 1  | 0 | -1.040542 | -3.110206 | 0.902811  |
|    |    |   |           |           |           | 55 | 6  | 0 | -0.139075 | -3.455410 | 3.212050  |
|    |    |   |           |           |           | 56 | 1  | 0 | 0.327155  | -1.427055 | 2.785776  |
|    |    |   |           |           |           | 57 | 6  | 0 | 1.771928  | -2.594998 | 1.717746  |

HF=-3453.6536033\ZeroPoint=0.4606946\Thermal=0.5038111

G = 13.2 kcal mol<sup>-1</sup>

| Center Number | Atomic Number | Atomic Type | Coordinates (Angstroms) |           |          |
|---------------|---------------|-------------|-------------------------|-----------|----------|
|               |               |             | X                       | Y         | Z        |
| 56            | 1             | 0           | 0.327155                | -1.427055 | 2.785776 |
| 57            | 6             | 0           | 1.771928                | -2.594998 | 1.717746 |

|    |    |   |           |           |           |
|----|----|---|-----------|-----------|-----------|
| 58 | 16 | 0 | -0.553642 | -5.074332 | 2.435765  |
| 59 | 1  | 0 | -1.057526 | -3.126908 | 3.702726  |
| 60 | 1  | 0 | 0.625535  | -3.614547 | 3.971069  |
| 61 | 8  | 0 | 2.361892  | -1.576518 | 1.171467  |
| 62 | 8  | 0 | 2.322468  | -3.673210 | 1.893551  |
| 63 | 1  | 0 | 0.701374  | -5.311030 | 1.999651  |
| 64 | 17 | 0 | -2.096512 | 0.298464  | 2.302206  |
| 65 | 1  | 0 | -0.417142 | -1.621086 | -0.072131 |
| 66 | 1  | 0 | 0.189292  | 4.910127  | 3.934091  |

-----  
HF=-3453.6259494\ZeroPoint=0.4572065\Thermal=0.499656

G = -23.8 kcal mol<sup>-1</sup>

| Center Number | Atomic Number | Atomic Type | Coordinates (Angstroms) |           |           |
|---------------|---------------|-------------|-------------------------|-----------|-----------|
|               |               |             | X                       | Y         | Z         |
| 1             | 46            | 0           | -1.298056               | -0.032820 | -0.322305 |
| 2             | 46            | 0           | 1.441929                | -0.969423 | 1.335421  |
| 3             | 7             | 0           | -0.196198               | -0.538142 | -2.044291 |
| 4             | 7             | 0           | -0.531216               | -1.448246 | -2.831324 |
| 5             | 6             | 0           | -1.802400               | -2.035053 | -2.675131 |
| 6             | 6             | 0           | -2.968511               | -1.267810 | -2.525534 |
| 7             | 6             | 0           | -4.191228               | -1.922287 | -2.407030 |
| 8             | 1             | 0           | -5.098746               | -1.336575 | -2.314871 |
| 9             | 6             | 0           | -4.253680               | -3.316359 | -2.418709 |
| 10            | 6             | 0           | -3.089391               | -4.068302 | -2.589617 |
| 11            | 1             | 0           | -3.138145               | -5.150662 | -2.611218 |
| 12            | 6             | 0           | -1.864735               | -3.430354 | -2.748932 |
| 13            | 1             | 0           | -0.950181               | -3.993039 | -2.890586 |
| 14            | 6             | 0           | 1.074474                | 0.076577  | -2.302928 |
| 15            | 6             | 0           | 1.424787                | 1.183296  | -1.530730 |
| 16            | 6             | 0           | 2.646071                | 1.815054  | -1.754879 |
| 17            | 1             | 0           | 2.916351                | 2.683289  | -1.164620 |
| 18            | 6             | 0           | 3.512266                | 1.342161  | -2.737932 |
| 19            | 1             | 0           | 4.463348                | 1.834131  | -2.906139 |
| 20            | 6             | 0           | 3.155363                | 0.225305  | -3.500815 |
| 21            | 1             | 0           | 3.831043                | -0.151874 | -4.259683 |
| 22            | 6             | 0           | 1.940577                | -0.412305 | -3.289394 |
| 23            | 1             | 0           | 1.658726                | -1.281761 | -3.866135 |
| 24            | 16            | 0           | 2.559092                | -2.504386 | 0.004945  |
| 25            | 6             | 0           | 4.069652                | -1.488550 | -0.263726 |
| 26            | 1             | 0           | 3.899353                | -0.765224 | -1.062740 |
| 27            | 1             | 0           | 4.879961                | -2.153928 | -0.565849 |
| 28            | 6             | 0           | 4.452048                | -0.748475 | 1.024394  |
| 29            | 1             | 0           | 4.699157                | -1.479019 | 1.796124  |
| 30            | 6             | 0           | 5.648035                | 0.159666  | 0.773824  |
| 31            | 8             | 0           | 6.795677                | -0.543650 | 0.703183  |
| 32            | 8             | 0           | 5.583365                | 1.353924  | 0.616854  |
| 33            | 7             | 0           | 3.289946                | 0.046320  | 1.485054  |
| 34            | 1             | 0           | 3.414873                | 0.387280  | 2.436197  |
| 35            | 1             | 0           | 3.196414                | 0.874889  | 0.896177  |
| 36            | 16            | 0           | -0.579768               | -1.997871 | 0.748856  |
| 37            | 6             | 0           | -1.673383               | -1.934443 | 2.248852  |
| 38            | 1             | 0           | -2.019706               | -2.946471 | 2.449668  |
| 39            | 1             | 0           | -1.085344               | -1.574181 | 3.091144  |
| 40            | 6             | 0           | -2.860554               | -1.007356 | 1.982594  |
| 41            | 1             | 0           | -3.515050               | -1.466672 | 1.235403  |

|    |    |   |           |           |           |
|----|----|---|-----------|-----------|-----------|
| 42 | 7  | 0 | -2.366411 | 0.274091  | 1.432749  |
| 43 | 1  | 0 | -1.687485 | 0.685338  | 2.087368  |
| 44 | 6  | 0 | -3.704118 | -0.755444 | 3.228661  |
| 45 | 8  | 0 | -4.101003 | -1.911545 | 3.795171  |
| 46 | 8  | 0 | -3.999623 | 0.336098  | 3.640331  |
| 47 | 1  | 0 | -5.210086 | -3.816621 | -2.317278 |
| 48 | 1  | 0 | -3.135436 | 0.929688  | 1.316477  |
| 49 | 1  | 0 | 7.514939  | 0.074245  | 0.499931  |
| 50 | 1  | 0 | -2.918290 | -0.185497 | -2.546442 |
| 51 | 7  | 0 | -0.263851 | 2.978742  | 0.481054  |
| 52 | 6  | 0 | -1.663292 | 3.372567  | 0.318283  |
| 53 | 1  | 0 | -0.022390 | 2.791515  | 1.448592  |
| 54 | 1  | 0 | 0.331500  | 3.726693  | 0.133046  |
| 55 | 6  | 0 | -1.923360 | 4.877849  | 0.501899  |
| 56 | 1  | 0 | -2.240164 | 2.874904  | 1.107132  |
| 57 | 6  | 0 | -2.258257 | 2.848160  | -1.023471 |
| 58 | 16 | 0 | -0.910039 | 5.963645  | -0.589898 |
| 59 | 1  | 0 | -1.650910 | 5.168140  | 1.519043  |
| 60 | 1  | 0 | -2.975010 | 5.108047  | 0.337610  |
| 61 | 8  | 0 | -2.112865 | 1.588105  | -1.312816 |
| 62 | 8  | 0 | -2.878436 | 3.613297  | -1.751590 |
| 63 | 1  | 0 | -1.499760 | 5.558189  | -1.733306 |
| 64 | 17 | 0 | 0.509956  | 0.628986  | 2.930375  |
| 65 | 1  | 0 | 0.741362  | 1.567838  | -0.778501 |
| 66 | 1  | 0 | -4.641305 | -1.696974 | 4.571490  |

-----  
HF=-3453.6842346\ZeroPoint=0.4602209\Thermal=0.5037553

G = -6.7 kcal mol<sup>-1</sup>

| Center Number | Atomic Number | Atomic Type | Coordinates (Angstroms) |           |           |
|---------------|---------------|-------------|-------------------------|-----------|-----------|
|               |               |             | X                       | Y         | Z         |
| 1             | 46            | 0           | 0.848447                | 0.729092  | -0.100149 |
| 2             | 46            | 0           | -1.719514               | 0.107816  | -1.236935 |
| 3             | 7             | 0           | 1.722783                | -0.616852 | -1.416704 |
| 4             | 7             | 0           | 2.945581                | -0.724007 | -1.661456 |
| 5             | 6             | 0           | 3.864748                | 0.180058  | -1.097224 |
| 6             | 6             | 0           | 5.050973                | -0.378757 | -0.602620 |
| 7             | 6             | 0           | 6.014775                | 0.446594  | -0.034285 |
| 8             | 1             | 0           | 6.918652                | 0.011796  | 0.375957  |
| 9             | 6             | 0           | 5.827313                | 1.830204  | -0.008832 |
| 10            | 6             | 0           | 4.672640                | 2.387061  | -0.559480 |
| 11            | 1             | 0           | 4.546233                | 3.463620  | -0.579470 |
| 12            | 6             | 0           | 3.683337                | 1.570457  | -1.099695 |
| 13            | 1             | 0           | 2.804944                | 1.998185  | -1.563174 |
| 14            | 6             | 0           | 0.861370                | -1.570864 | -2.065961 |
| 15            | 6             | 0           | -0.537825               | -1.381727 | -2.048380 |
| 16            | 6             | 0           | -1.289132               | -2.373267 | -2.713727 |
| 17            | 1             | 0           | -2.368451               | -2.270962 | -2.767556 |
| 18            | 6             | 0           | -0.710544               | -3.483934 | -3.314801 |
| 19            | 1             | 0           | -1.337667               | -4.222128 | -3.803552 |
| 20            | 6             | 0           | 0.678732                | -3.655602 | -3.278630 |
| 21            | 1             | 0           | 1.139587                | -4.529493 | -3.723722 |
| 22            | 6             | 0           | 1.462148                | -2.698772 | -2.664236 |
| 23            | 1             | 0           | 2.535882                | -2.814254 | -2.614783 |
| 24            | 16            | 0           | -3.344407               | 1.635734  | -0.400272 |
| 25            | 6             | 0           | -4.594023               | 0.346472  | -0.004911 |

|                                                       |        |        |                         |           |           |    |    |   |           |           |           |
|-------------------------------------------------------|--------|--------|-------------------------|-----------|-----------|----|----|---|-----------|-----------|-----------|
| 26                                                    | 1      | 0      | -5.062341               | 0.006078  | -0.932772 | 10 | 6  | 0 | 4.762906  | 1.835653  | 1.049713  |
| 27                                                    | 1      | 0      | -5.366049               | 0.779964  | 0.631841  | 11 | 1  | 0 | 4.679076  | 2.900148  | 1.235893  |
| 28                                                    | 6      | 0      | -3.928518               | -0.827112 | 0.719309  | 12 | 6  | 0 | 3.951926  | 1.238821  | 0.089278  |
| 29                                                    | 1      | 0      | -3.585546               | -0.488281 | 1.699227  | 13 | 1  | 0 | 3.260550  | 1.830352  | -0.497395 |
| 30                                                    | 6      | 0      | -4.906865               | -1.971706 | 0.908710  | 14 | 6  | 0 | 1.422996  | -1.333347 | -2.263449 |
| 31                                                    | 8      | 0      | -5.902894               | -1.640387 | 1.752082  | 15 | 6  | 0 | 0.050991  | -1.627704 | -2.101972 |
| 32                                                    | 8      | 0      | -4.836752               | -3.044094 | 0.354608  | 16 | 6  | 0 | -0.539787 | -2.413746 | -3.105577 |
| 33                                                    | 7      | 0      | -2.729222               | -1.318413 | -0.016588 | 17 | 1  | 0 | -1.574741 | -2.720060 | -2.998640 |
| 34                                                    | 1      | 0      | -2.013484               | -1.526301 | 0.686692  | 18 | 6  | 0 | 0.165593  | -2.817090 | -4.236050 |
| 35                                                    | 1      | 0      | -2.958175               | -2.189809 | -0.494010 | 19 | 1  | 0 | -0.326223 | -3.402723 | -5.004620 |
| 36                                                    | 16     | 0      | -0.170232               | 1.774531  | -1.954035 | 20 | 6  | 0 | 1.509721  | -2.466450 | -4.378865 |
| 37                                                    | 6      | 0      | -0.692084               | 3.355926  | -1.130410 | 21 | 1  | 0 | 2.061115  | -2.768819 | -5.261561 |
| 38                                                    | 1      | 0      | -0.279259               | 4.177459  | -1.713695 | 22 | 6  | 0 | 2.150982  | -1.739540 | -3.383887 |
| 39                                                    | 1      | 0      | -1.777970               | 3.417183  | -1.177455 | 23 | 1  | 0 | 3.198544  | -1.483016 | -3.469753 |
| 40                                                    | 6      | 0      | -0.183127               | 3.448766  | 0.316572  | 24 | 16 | 0 | -3.146878 | 1.447296  | -0.866777 |
| 41                                                    | 1      | 0      | 0.870394                | 3.747221  | 0.290359  | 25 | 6  | 0 | -4.312113 | 0.317683  | 0.009015  |
| 42                                                    | 7      | 0      | -0.243412               | 2.138187  | 1.006629  | 26 | 1  | 0 | -5.077768 | -0.023391 | -0.694040 |
| 43                                                    | 1      | 0      | -1.210327               | 1.777337  | 1.012905  | 27 | 1  | 0 | -4.792898 | 0.880581  | 0.808831  |
| 44                                                    | 6      | 0      | -0.891584               | 4.516777  | 1.150098  | 28 | 6  | 0 | -3.552416 | -0.868851 | 0.597199  |
| 45                                                    | 8      | 0      | -1.169221               | 5.616425  | 0.422149  | 29 | 1  | 0 | -2.887583 | -0.513982 | 1.394199  |
| 46                                                    | 8      | 0      | -1.121159               | 4.407960  | 2.325001  | 30 | 6  | 0 | -4.511558 | -1.900865 | 1.168760  |
| 47                                                    | 1      | 0      | 6.589152                | 2.472898  | 0.416799  | 31 | 8  | 0 | -5.154512 | -1.433444 | 2.250934  |
| 48                                                    | 1      | 0      | -0.011632               | 2.238342  | 1.994853  | 32 | 8  | 0 | -4.697515 | -2.996738 | 0.694925  |
| 49                                                    | 1      | 0      | -6.501790               | -2.399762 | 1.817135  | 33 | 7  | 0 | -2.715851 | -1.502322 | -0.458280 |
| 50                                                    | 1      | 0      | 5.176830                | -1.454343 | -0.639259 | 34 | 1  | 0 | -2.075795 | -2.163437 | -0.009640 |
| 51                                                    | 7      | 0      | 1.531630                | -0.202019 | 1.704801  | 35 | 1  | 0 | -3.314291 | -2.040691 | -1.084018 |
| 52                                                    | 6      | 0      | 2.562764                | -1.253464 | 1.812974  | 36 | 16 | 0 | 0.092147  | 1.603981  | -2.098453 |
| 53                                                    | 1      | 0      | 1.817621                | 0.559936  | 2.316510  | 37 | 6  | 0 | -0.493537 | 3.251537  | -1.488119 |
| 54                                                    | 1      | 0      | 0.608055                | -0.511020 | 2.090258  | 38 | 1  | 0 | -0.053600 | 4.009971  | -2.133031 |
| 55                                                    | 6      | 0      | 2.829885                | -1.663527 | 3.278394  | 39 | 1  | 0 | -1.576086 | 3.298949  | -1.593123 |
| 56                                                    | 1      | 0      | 3.496669                | -0.851872 | 1.416287  | 40 | 6  | 0 | -0.064198 | 3.488233  | -0.033154 |
| 57                                                    | 6      | 0      | 2.256193                | -2.485630 | 0.975500  | 41 | 1  | 0 | 0.998328  | 3.753435  | -0.027557 |
| 58                                                    | 16     | 0      | 1.522044                | -2.645957 | 4.113561  | 42 | 7  | 0 | -0.221466 | 2.257733  | 0.773601  |
| 59                                                    | 1      | 0      | 3.053934                | -0.762047 | 3.855642  | 43 | 1  | 0 | -1.195145 | 1.925078  | 0.733649  |
| 60                                                    | 1      | 0      | 3.717271                | -2.298300 | 3.298485  | 44 | 6  | 0 | -0.785623 | 4.665273  | 0.623572  |
| 61                                                    | 8      | 0      | 0.950943                | -2.636228 | 0.721464  | 45 | 8  | 0 | -0.887965 | 5.710742  | -0.226898 |
| 62                                                    | 8      | 0      | 3.116961                | -3.241678 | 0.597651  | 46 | 8  | 0 | -1.168237 | 4.680499  | 1.760586  |
| 63                                                    | 1      | 0      | 0.481205                | -1.796574 | 3.897373  | 47 | 1  | 0 | 6.311242  | 1.542738  | 2.514589  |
| 64                                                    | 17     | 0      | -1.273751               | -0.397501 | 2.850352  | 48 | 1  | 0 | -0.080173 | 2.429822  | 1.771652  |
| 65                                                    | 1      | 0      | 0.834479                | -3.428303 | 0.173422  | 49 | 1  | 0 | -5.746649 | -2.130020 | 2.573273  |
| 66                                                    | 1      | 0      | -1.595488               | 6.262253  | 1.006910  | 50 | 1  | 0 | 5.155213  | -1.941565 | 0.267242  |
| -----                                                 |        |        |                         |           |           |    |    |   |           |           |           |
| HF=-3453.661093\ZeroPoint=0.4609569\Thermal=0.5037741 |        |        |                         |           |           |    |    |   |           |           |           |
| G = 11.7 kcal mol <sup>-1</sup>                       |        |        |                         |           |           |    |    |   |           |           |           |
| -----                                                 |        |        |                         |           |           |    |    |   |           |           |           |
| Center                                                | Atomic | Atomic | Coordinates (Angstroms) |           |           |    |    |   |           |           |           |
| Number                                                | Number | Type   | X                       | Y         | Z         |    |    |   |           |           |           |
| -----                                                 |        |        |                         |           |           |    |    |   |           |           |           |
| 1                                                     | 46     | 0      | 0.946301                | 0.732992  | -0.070606 | 51 | 7  | 0 | 1.208041  | -0.225657 | 1.821169  |
| 2                                                     | 46     | 0      | -1.496006               | -0.084228 | -1.440990 | 52 | 6  | 0 | 1.697625  | -1.627144 | 1.910959  |
| 3                                                     | 7      | 0      | 2.087428                | -0.619650 | -1.201131 | 53 | 1  | 0 | 1.784280  | 0.352770  | 2.430334  |
| 4                                                     | 7      | 0      | 3.317413                | -0.834434 | -1.110991 | 54 | 1  | 0 | 0.240497  | -0.139892 | 2.204240  |
| 5                                                     | 6      | 0      | 4.080575                | -0.135384 | -0.162001 | 55 | 6  | 0 | 1.560891  | -2.212821 | 3.328652  |
| 6                                                     | 6      | 0      | 5.057313                | -0.889106 | 0.504582  | 56 | 1  | 0 | 2.763913  | -1.610519 | 1.679260  |
| 7                                                     | 6      | 0      | 5.837418                | -0.288278 | 1.484473  | 57 | 6  | 0 | 1.048262  | -2.536941 | 0.849193  |
| 8                                                     | 1      | 0      | 6.568213                | -0.877319 | 2.025542  | 58 | 16 | 0 | -0.121817 | -2.706245 | 3.875491  |
| 9                                                     | 6      | 0      | 5.689205                | 1.072975  | 1.761667  | 59 | 1  | 0 | 1.997074  | -1.519684 | 4.053541  |
|                                                       |        |        |                         |           |           | 60 | 1  | 0 | 2.144152  | -3.134814 | 3.358424  |
|                                                       |        |        |                         |           |           | 61 | 8  | 0 | -0.126955 | -2.140733 | 0.442621  |
|                                                       |        |        |                         |           |           | 62 | 8  | 0 | 1.676133  | -3.493885 | 0.433750  |
|                                                       |        |        |                         |           |           | 63 | 1  | 0 | -0.700376 | -1.476062 | 3.797363  |
|                                                       |        |        |                         |           |           | 64 | 17 | 0 | -1.492584 | 0.640769  | 3.087143  |
|                                                       |        |        |                         |           |           | 65 | 1  | 0 | -0.170167 | -1.889401 | -0.794239 |
|                                                       |        |        |                         |           |           | 66 | 1  | 0 | -1.325157 | 6.436189  | 0.245507  |
| -----                                                 |        |        |                         |           |           |    |    |   |           |           |           |



HF=-3453.6283117\ZeroPoint=0.4565721\Thermal=0.4988432

G = 3.5 kcal mol<sup>-1</sup>

| Center Number | Atomic Number | Atomic Type | Coordinates (Angstroms) |           |           |
|---------------|---------------|-------------|-------------------------|-----------|-----------|
|               |               |             | X                       | Y         | Z         |
| 1             | 46            | 0           | -0.846296               | -0.641995 | 0.436732  |
| 2             | 46            | 0           | 1.678770                | -0.926200 | -1.170125 |
| 3             | 7             | 0           | -1.998663               | -0.604263 | -1.345160 |
| 4             | 7             | 0           | -3.218797               | -0.462621 | -1.557248 |
| 5             | 6             | 0           | -4.082557               | -0.143802 | -0.493085 |
| 6             | 6             | 0           | -5.110282               | 0.756204  | -0.806048 |
| 7             | 6             | 0           | -5.986174               | 1.165136  | 0.191090  |
| 8             | 1             | 0           | -6.756954               | 1.891732  | -0.035554 |
| 9             | 6             | 0           | -5.877808               | 0.635699  | 1.478999  |
| 10            | 6             | 0           | -4.894278               | -0.311337 | 1.769105  |
| 11            | 1             | 0           | -4.837568               | -0.749444 | 2.758851  |
| 12            | 6             | 0           | -3.989905               | -0.703878 | 0.788468  |
| 13            | 1             | 0           | -3.238824               | -1.456667 | 0.994691  |
| 14            | 6             | 0           | -1.253001               | -1.063623 | -2.495176 |
| 15            | 6             | 0           | -0.117751               | -0.339881 | -2.897442 |
| 16            | 6             | 0           | 0.706009                | -0.890057 | -3.885449 |
| 17            | 1             | 0           | 1.554823                | -0.321503 | -4.246400 |
| 18            | 6             | 0           | 0.398526                | -2.130380 | -4.459485 |
| 19            | 1             | 0           | 1.050527                | -2.554768 | -5.213187 |
| 20            | 6             | 0           | -0.754830               | -2.801518 | -4.074978 |
| 21            | 1             | 0           | -1.004470               | -3.755120 | -4.524999 |
| 22            | 6             | 0           | -1.591147               | -2.270359 | -3.086963 |
| 23            | 1             | 0           | -2.467843               | -2.808112 | -2.749104 |
| 24            | 16            | 0           | 3.218752                | -1.112813 | 0.520585  |
| 25            | 6             | 0           | 4.046360                | 0.536423  | 0.414568  |
| 26            | 1             | 0           | 4.989858                | 0.419509  | -0.124449 |
| 27            | 1             | 0           | 4.239351                | 0.871540  | 1.433804  |
| 28            | 6             | 0           | 3.125403                | 1.531284  | -0.281475 |
| 29            | 1             | 0           | 2.288960                | 1.771038  | 0.380792  |
| 30            | 6             | 0           | 3.871324                | 2.811859  | -0.625566 |
| 31            | 8             | 0           | 4.172280                | 3.521364  | 0.470491  |
| 32            | 8             | 0           | 4.184500                | 3.133412  | -1.747970 |
| 33            | 7             | 0           | 2.562018                | 0.946867  | -1.530628 |
| 34            | 1             | 0           | 1.746038                | 1.539019  | -1.764412 |
| 35            | 1             | 0           | 3.251755                | 1.000312  | -2.278907 |
| 36            | 16            | 0           | 0.231835                | -2.655834 | -0.318491 |
| 37            | 6             | 0           | 0.865317                | -3.275316 | 1.305515  |
| 38            | 1             | 0           | 0.578550                | -4.321835 | 1.387846  |
| 39            | 1             | 0           | 1.952429                | -3.215000 | 1.310624  |
| 40            | 6             | 0           | 0.260895                | -2.468072 | 2.459422  |
| 41            | 1             | 0           | -0.786588               | -2.765583 | 2.577273  |
| 42            | 7             | 0           | 0.289570                | -1.022329 | 2.148052  |
| 43            | 1             | 0           | 1.248617                | -0.724301 | 1.912554  |
| 44            | 6             | 0           | 0.918152                | -2.748064 | 3.811676  |
| 45            | 8             | 0           | 1.199612                | -4.062600 | 3.955829  |
| 46            | 8             | 0           | 1.111846                | -1.920125 | 4.657447  |
| 47            | 1             | 0           | -6.572127               | 0.945910  | 2.251150  |
| 48            | 1             | 0           | 0.069352                | -0.441812 | 2.962560  |
| 49            | 1             | 0           | 4.640422                | 4.323239  | 0.191867  |
| 50            | 1             | 0           | -5.165587               | 1.156359  | -1.810811 |
| 51            | 7             | 0           | -1.293743               | 1.302170  | 1.147784  |

|    |    |   |           |           |           |
|----|----|---|-----------|-----------|-----------|
| 52 | 6  | 0 | -1.843399 | 2.319914  | 0.214237  |
| 53 | 1  | 0 | -1.891055 | 1.250416  | 1.971821  |
| 54 | 1  | 0 | -0.357019 | 1.593490  | 1.502526  |
| 55 | 6  | 0 | -1.944097 | 3.710197  | 0.867076  |
| 56 | 1  | 0 | -2.862894 | 2.020404  | -0.027665 |
| 57 | 6  | 0 | -1.045913 | 2.350081  | -1.114041 |
| 58 | 16 | 0 | -0.387729 | 4.655886  | 1.114385  |
| 59 | 1  | 0 | -2.480989 | 3.633059  | 1.817834  |
| 60 | 1  | 0 | -2.540784 | 4.333633  | 0.198978  |
| 61 | 8  | 0 | 0.159578  | 1.964627  | -1.027479 |
| 62 | 8  | 0 | -1.672344 | 2.697112  | -2.121166 |
| 63 | 1  | 0 | 0.257796  | 3.748898  | 1.894687  |
| 64 | 17 | 0 | 1.316087  | 1.780024  | 2.798093  |
| 65 | 1  | 0 | 0.010828  | 0.673549  | -2.526557 |
| 66 | 1  | 0 | 1.578815  | -4.189358 | 4.839509  |

HF=-3453.6441904\ZeroPoint=0.4606952\Thermal=0.5035095

G = -18.4 kcal mol<sup>-1</sup>

| Center Number | Atomic Number | Atomic Type | Coordinates (Angstroms) |           |           |
|---------------|---------------|-------------|-------------------------|-----------|-----------|
|               |               |             | X                       | Y         | Z         |
| 1             | 46            | 0           | -1.473137               | -0.128819 | -0.205803 |
| 2             | 46            | 0           | 1.148124                | 1.537785  | -0.457329 |
| 3             | 7             | 0           | -2.286587               | 1.714992  | 0.308700  |
| 4             | 7             | 0           | -3.522232               | 1.796449  | 0.494590  |
| 5             | 6             | 0           | -4.340782               | 0.704409  | 0.131449  |
| 6             | 6             | 0           | -4.330907               | 0.194051  | -1.174312 |
| 7             | 6             | 0           | -5.200380               | -0.839968 | -1.509462 |
| 8             | 1             | 0           | -5.207112               | -1.225663 | -2.522814 |
| 9             | 6             | 0           | -6.064808               | -1.370791 | -0.552570 |
| 10            | 6             | 0           | -6.084878               | -0.838967 | 0.737912  |
| 11            | 1             | 0           | -6.758985               | -1.245958 | 1.482365  |
| 12            | 6             | 0           | -5.244974               | 0.215421  | 1.076466  |
| 13            | 1             | 0           | -5.244614               | 0.634772  | 2.074427  |
| 14            | 6             | 0           | -1.534747               | 2.920265  | 0.505372  |
| 15            | 6             | 0           | -0.159528               | 2.963031  | 0.194927  |
| 16            | 6             | 0           | 0.448182                | 4.235933  | 0.300277  |
| 17            | 1             | 0           | 1.500412                | 4.334192  | 0.071851  |
| 18            | 6             | 0           | -0.239870               | 5.367297  | 0.711596  |
| 19            | 1             | 0           | 0.279890                | 6.317472  | 0.775547  |
| 20            | 6             | 0           | -1.592904               | 5.279387  | 1.058593  |
| 21            | 1             | 0           | -2.135468               | 6.152310  | 1.402434  |
| 22            | 6             | 0           | -2.235095               | 4.065600  | 0.947588  |
| 23            | 1             | 0           | -3.285282               | 3.974764  | 1.186063  |
| 24            | 16            | 0           | 2.532238                | 1.992907  | 1.411844  |
| 25            | 6             | 0           | 4.120944                | 1.254019  | 0.809664  |
| 26            | 1             | 0           | 4.254986                | 0.268786  | 1.253092  |
| 27            | 1             | 0           | 4.936098                | 1.907711  | 1.115394  |
| 28            | 6             | 0           | 4.101760                | 1.130699  | -0.714610 |
| 29            | 1             | 0           | 4.081877                | 2.138891  | -1.144093 |
| 30            | 6             | 0           | 5.340809                | 0.451633  | -1.293717 |
| 31            | 8             | 0           | 6.479374                | 0.906226  | -0.728430 |
| 32            | 8             | 0           | 5.321500                | -0.358399 | -2.185872 |
| 33            | 7             | 0           | 2.879526                | 0.418514  | -1.147199 |
| 34            | 1             | 0           | 2.927297                | 0.264633  | -2.151172 |
| 35            | 1             | 0           | 2.891150                | -0.509136 | -0.688347 |

|                                                        |        |        |                         |           |           |                                                       |        |        |                         |           |           |
|--------------------------------------------------------|--------|--------|-------------------------|-----------|-----------|-------------------------------------------------------|--------|--------|-------------------------|-----------|-----------|
| 36                                                     | 16     | 0      | -0.419739               | 0.713888  | -2.114516 | 20                                                    | 6      | 0      | -1.146623               | 5.074710  | -0.211966 |
| 37                                                     | 6      | 0      | 0.252456                | -0.922810 | -2.701400 | 21                                                    | 1      | 0      | -1.550892               | 6.068500  | -0.366992 |
| 38                                                     | 1      | 0      | 0.403607                | -0.860795 | -3.777347 | 22                                                    | 6      | 0      | -1.950500               | 3.966325  | -0.424503 |
| 39                                                     | 1      | 0      | 1.204466                | -1.135005 | -2.218930 | 23                                                    | 1      | 0      | -2.983031               | 4.087212  | -0.719083 |
| 40                                                     | 6      | 0      | -0.740894               | -2.024437 | -2.349481 | 24                                                    | 16     | 0      | 3.139686                | 2.256650  | -0.778845 |
| 41                                                     | 1      | 0      | -1.696472               | -1.810687 | -2.842080 | 25                                                    | 6      | 0      | 4.414147                | 0.955544  | -1.024420 |
| 42                                                     | 7      | 0      | -0.966584               | -2.020512 | -0.886768 | 26                                                    | 1      | 0      | 4.565850                | 0.394941  | -0.098523 |
| 43                                                     | 1      | 0      | -0.115030               | -2.356061 | -0.386846 | 27                                                    | 1      | 0      | 5.347044                | 1.440161  | -1.309960 |
| 44                                                     | 6      | 0      | -0.346684               | -3.429595 | -2.809950 | 28                                                    | 6      | 0      | 3.930622                | 0.019748  | -2.123935 |
| 45                                                     | 8      | 0      | -0.689692               | -4.433460 | -2.244797 | 29                                                    | 1      | 0      | 3.789193                | 0.599777  | -3.041797 |
| 46                                                     | 8      | 0      | 0.375982                | -3.413987 | -3.948733 | 30                                                    | 6      | 0      | 4.878947                | -1.125623 | -2.463571 |
| 47                                                     | 1      | 0      | -6.731467               | -2.184068 | -0.814694 | 31                                                    | 8      | 0      | 6.144028                | -0.692566 | -2.634356 |
| 48                                                     | 1      | 0      | 0.565857                | -4.333633 | -4.192001 | 32                                                    | 8      | 0      | 4.540345                | -2.273828 | -2.604006 |
| 49                                                     | 1      | 0      | -1.706724               | -2.673392 | -0.635592 | 33                                                    | 7      | 0      | 2.622492                | -0.527003 | -1.703191 |
| 50                                                     | 1      | 0      | 7.221613                | 0.458586  | -1.162749 | 34                                                    | 1      | 0      | 2.262634                | -1.162044 | -2.410482 |
| 51                                                     | 1      | 0      | -3.677832               | 0.632021  | -1.918391 | 35                                                    | 1      | 0      | 2.754387                | -1.063961 | -0.826098 |
| 52                                                     | 17     | 0      | -2.062751               | -1.051361 | 1.927717  | 36                                                    | 16     | 0      | -0.523704               | -0.708148 | -1.496805 |
| 53                                                     | 1      | 0      | 1.570454                | 0.172875  | 2.225624  | 37                                                    | 6      | 0      | 0.075207                | -2.399003 | -0.988766 |
| 54                                                     | 7      | 0      | 1.023667                | -0.586723 | 2.719238  | 38                                                    | 1      | 0      | 0.322543                | -2.959055 | -1.888667 |
| 55                                                     | 6      | 0      | 1.703763                | -1.941044 | 2.651118  | 39                                                    | 1      | 0      | 0.958868                | -2.310120 | -0.357004 |
| 56                                                     | 6      | 0      | 0.803362                | -2.988711 | 3.291142  | 40                                                    | 6      | 0      | -1.042765               | -3.098275 | -0.214283 |
| 57                                                     | 1      | 0      | 2.649620                | -1.843575 | 3.183886  | 41                                                    | 1      | 0      | -1.913071               | -3.220568 | -0.868922 |
| 58                                                     | 6      | 0      | 2.013665                | -2.184175 | 1.138146  | 42                                                    | 7      | 0      | -1.435160               | -2.255391 | 0.935342  |
| 59                                                     | 16     | 0      | 1.607740                | -4.637276 | 3.348901  | 43                                                    | 1      | 0      | -0.613418               | -2.158417 | 1.566372  |
| 60                                                     | 1      | 0      | -0.137652               | -3.060095 | 2.747825  | 44                                                    | 6      | 0      | -0.673424               | -4.502217 | 0.266251  |
| 61                                                     | 1      | 0      | 0.585944                | -2.732453 | 4.332012  | 45                                                    | 8      | 0      | -0.994980               | -4.955236 | 1.331818  |
| 62                                                     | 8      | 0      | 1.189246                | -2.879908 | 0.500976  | 46                                                    | 8      | 0      | 0.006244                | -5.190924 | -0.673978 |
| 63                                                     | 8      | 0      | 3.033037                | -1.606736 | 0.715834  | 47                                                    | 1      | 0      | -7.196564               | -1.881750 | -1.292239 |
| 64                                                     | 1      | 0      | 1.562967                | -4.832704 | 2.014745  | 48                                                    | 1      | 0      | 0.195985                | -6.072605 | -0.317421 |
| 65                                                     | 1      | 0      | 0.067132                | -0.639551 | 2.312447  | 49                                                    | 1      | 0      | -2.195104               | -2.673444 | 1.468010  |
| 66                                                     | 1      | 0      | 0.905728                | -0.282225 | 3.686317  | 50                                                    | 1      | 0      | 6.690216                | -1.457466 | -2.872751 |
| -----                                                  |        |        |                         |           |           |                                                       |        |        |                         |           |           |
| HF=-3453.6792311\ZeroPoint=0.4613645\Thermal=0.5040777 |        |        |                         |           |           |                                                       |        |        |                         |           |           |
| G = 4.2 kcal mol <sup>-1</sup>                         |        |        |                         |           |           |                                                       |        |        |                         |           |           |
| -----                                                  |        |        |                         |           |           |                                                       |        |        |                         |           |           |
| Center                                                 | Atomic | Atomic | Coordinates (Angstroms) |           |           | Center                                                | Atomic | Atomic | Coordinates (Angstroms) |           |           |
| Number                                                 | Number | Type   | X                       | Y         | Z         | Number                                                | Number | Type   | X                       | Y         | Z         |
| -----                                                  |        |        |                         |           |           |                                                       |        |        |                         |           |           |
| 1                                                      | 46     | 0      | -1.882485               | -0.328956 | 0.343691  | 59                                                    | 16     | 0      | 4.355878                | -0.096052 | 3.744984  |
| 2                                                      | 46     | 0      | 1.234238                | 0.885739  | -0.971491 | 60                                                    | 1      | 0      | 2.006100                | -0.362185 | 4.362539  |
| 3                                                      | 7      | 0      | -2.360465               | 1.564162  | -0.341973 | 61                                                    | 1      | 0      | 2.527001                | 1.327404  | 4.210529  |
| 4                                                      | 7      | 0      | -3.512019               | 1.850178  | -0.732164 | 62                                                    | 8      | 0      | 0.890226                | -1.715778 | 2.184207  |
| 5                                                      | 6      | 0      | -4.456829               | 0.811404  | -0.885340 | 63                                                    | 8      | 0      | 2.733466                | -1.400337 | 0.935087  |
| 6                                                      | 6      | 0      | -4.223120               | -0.292660 | -1.715227 | 64                                                    | 1      | 0      | 4.243710                | -1.184283 | 2.954694  |
| 7                                                      | 6      | 0      | -5.220472               | -1.251302 | -1.865641 | 65                                                    | 1      | 0      | -0.090071               | 0.275951  | 2.636492  |
| 8                                                      | 1      | 0      | -5.052339               | -2.097187 | -2.522441 | 66                                                    | 1      | 0      | 0.518723                | 1.767805  | 2.995842  |
| 9                                                      | 6      | 0      | -6.429300               | -1.124249 | -1.182333 | -----                                                 |        |        |                         |           |           |
| 10                                                     | 6      | 0      | -6.658658               | -0.011584 | -0.371356 | HF=-3453.6396421\ZeroPoint=0.457249\Thermal=0.4997837 |        |        |                         |           |           |
| 11                                                     | 1      | 0      | -7.598048               | 0.090991  | 0.158717  | G = 9.3 kcal mol <sup>-1</sup>                        |        |        |                         |           |           |
| 12                                                     | 6      | 0      | -5.688114               | 0.974735  | -0.244881 | -----                                                 |        |        |                         |           |           |
| 13                                                     | 1      | 0      | -5.849303               | 1.844378  | 0.379364  | Center                                                | Atomic | Atomic | Coordinates (Angstroms) |           |           |
| 14                                                     | 6      | 0      | -1.442543               | 2.673902  | -0.228971 | Number                                                | Number | Type   | X                       | Y         | Z         |
| 15                                                     | 6      | 0      | -0.092807               | 2.449605  | 0.147078  | -----                                                 |        |        |                         |           |           |
| 16                                                     | 6      | 0      | 0.655509                | 3.617861  | 0.418540  | 1                                                     | 46     | 0      | 2.098464                | 0.547583  | 0.329704  |
| 17                                                     | 1      | 0      | 1.666024                | 3.502080  | 0.789455  | 2                                                     | 46     | 0      | -1.188657               | -1.183160 | -0.642235 |
| 18                                                     | 6      | 0      | 0.162537                | 4.901865  | 0.236542  | 3                                                     | 7      | 0      | 2.717451                | -1.422110 | 0.072388  |
| 19                                                     | 1      | 0      | 0.791660                | 5.759825  | 0.444966  |                                                       |        |        |                         |           |           |

|    |    |   |           |           |           |
|----|----|---|-----------|-----------|-----------|
| 4  | 7  | 0 | 3.858113  | -1.874893 | -0.180231 |
| 5  | 6  | 0 | 4.887848  | -0.993998 | -0.536673 |
| 6  | 6  | 0 | 4.703415  | 0.125930  | -1.362144 |
| 7  | 6  | 0 | 5.797119  | 0.916191  | -1.689066 |
| 8  | 1  | 0 | 5.663632  | 1.773686  | -2.338154 |
| 9  | 6  | 0 | 7.062592  | 0.610433  | -1.186353 |
| 10 | 6  | 0 | 7.246356  | -0.518201 | -0.385036 |
| 11 | 1  | 0 | 8.231045  | -0.760130 | -0.003486 |
| 12 | 6  | 0 | 6.168681  | -1.339563 | -0.085217 |
| 13 | 1  | 0 | 6.286724  | -2.225042 | 0.526945  |
| 14 | 6  | 0 | 1.700501  | -2.409426 | 0.280051  |
| 15 | 6  | 0 | 0.559175  | -2.035024 | 1.028574  |
| 16 | 6  | 0 | -0.425171 | -2.992003 | 1.292453  |
| 17 | 1  | 0 | -1.227192 | -2.715409 | 1.964274  |
| 18 | 6  | 0 | -0.305090 | -4.290387 | 0.767741  |
| 19 | 1  | 0 | -1.084529 | -5.017469 | 0.957975  |
| 20 | 6  | 0 | 0.806715  | -4.630192 | 0.010987  |
| 21 | 1  | 0 | 0.898318  | -5.628661 | -0.400383 |
| 22 | 6  | 0 | 1.816177  | -3.694730 | -0.236105 |
| 23 | 1  | 0 | 2.684385  | -3.955043 | -0.826409 |
| 24 | 16 | 0 | -2.996462 | -2.659824 | -0.324962 |
| 25 | 6  | 0 | -4.350618 | -1.538523 | -0.863228 |
| 26 | 1  | 0 | -4.666385 | -0.890382 | -0.040327 |
| 27 | 1  | 0 | -5.198796 | -2.150787 | -1.168241 |
| 28 | 6  | 0 | -3.844804 | -0.700975 | -2.027946 |
| 29 | 1  | 0 | -3.592311 | -1.368746 | -2.857854 |
| 30 | 6  | 0 | -4.843810 | 0.321879  | -2.560081 |
| 31 | 8  | 0 | -6.046559 | -0.237820 | -2.795111 |
| 32 | 8  | 0 | -4.586351 | 1.478415  | -2.778079 |
| 33 | 7  | 0 | -2.613751 | -0.003837 | -1.593669 |
| 34 | 1  | 0 | -2.233421 | 0.544292  | -2.360771 |
| 35 | 1  | 0 | -2.813895 | 0.660447  | -0.809718 |
| 36 | 16 | 0 | 0.544942  | 0.361751  | -1.418233 |
| 37 | 6  | 0 | -0.151984 | 2.085998  | -1.316725 |
| 38 | 1  | 0 | -0.368300 | 2.428836  | -2.326992 |
| 39 | 1  | 0 | -1.065121 | 2.066436  | -0.718585 |
| 40 | 6  | 0 | 0.862646  | 3.016176  | -0.646481 |
| 41 | 1  | 0 | 1.737447  | 3.138421  | -1.294358 |
| 42 | 7  | 0 | 1.296607  | 2.416702  | 0.629572  |
| 43 | 1  | 0 | 0.460641  | 2.228812  | 1.235000  |
| 44 | 6  | 0 | 0.300285  | 4.418201  | -0.413225 |
| 45 | 8  | 0 | 0.405337  | 5.031503  | 0.614502  |
| 46 | 8  | 0 | -0.290660 | 4.903040  | -1.526299 |
| 47 | 1  | 0 | 7.908535  | 1.241549  | -1.433039 |
| 48 | 1  | 0 | -0.621759 | 5.791619  | -1.323683 |
| 49 | 1  | 0 | 1.933897  | 3.025027  | 1.140203  |
| 50 | 1  | 0 | -6.633611 | 0.450966  | -3.143410 |
| 51 | 1  | 0 | 3.724724  | 0.342933  | -1.769599 |
| 52 | 17 | 0 | 3.637127  | 0.903033  | 2.061549  |
| 53 | 1  | 0 | 0.525573  | -1.084575 | 1.551982  |
| 54 | 7  | 0 | -1.777497 | -0.664506 | 3.311317  |
| 55 | 6  | 0 | -2.720115 | 0.045931  | 2.442425  |
| 56 | 6  | 0 | -3.894184 | 0.690060  | 3.215410  |
| 57 | 1  | 0 | -3.142335 | -0.665594 | 1.729497  |
| 58 | 6  | 0 | -1.966652 | 1.127637  | 1.633422  |
| 59 | 16 | 0 | -5.347219 | 1.168295  | 2.182666  |
| 60 | 1  | 0 | -3.548690 | 1.552346  | 3.790501  |
| 61 | 1  | 0 | -4.299246 | -0.042299 | 3.918344  |

|    |   |   |           |           |          |
|----|---|---|-----------|-----------|----------|
| 62 | 8 | 0 | -0.842263 | 1.483175  | 2.051289 |
| 63 | 8 | 0 | -2.556626 | 1.587662  | 0.609446 |
| 64 | 1 | 0 | -4.633152 | 1.884066  | 1.287395 |
| 65 | 1 | 0 | -1.069889 | -0.011275 | 3.637752 |
| 66 | 1 | 0 | -2.242712 | -1.072377 | 4.115381 |

HF=-3453.6621868\ZeroPoint=0.4600714\Thermal=0.5033447

G = -17.5 kcal mol<sup>-1</sup>

| Center Number | Atomic Number | Atomic Type | Coordinates (Angstroms) |           |           |
|---------------|---------------|-------------|-------------------------|-----------|-----------|
|               |               |             | X                       | Y         | Z         |
| 1             | 46            | 0           | 1.834268                | 0.239517  | 0.456945  |
| 2             | 46            | 0           | -1.123975               | -0.473468 | -1.583622 |
| 3             | 7             | 0           | 1.965426                | -1.630365 | -0.359380 |
| 4             | 7             | 0           | 3.006000                | -2.173323 | -0.772107 |
| 5             | 6             | 0           | 4.173942                | -1.373039 | -0.903149 |
| 6             | 6             | 0           | 4.223628                | -0.275221 | -1.767636 |
| 7             | 6             | 0           | 5.416667                | 0.428818  | -1.903554 |
| 8             | 1             | 0           | 5.463009                | 1.271996  | -2.583435 |
| 9             | 6             | 0           | 6.545459                | 0.052221  | -1.176299 |
| 10            | 6             | 0           | 6.488470                | -1.053192 | -0.326943 |
| 11            | 1             | 0           | 7.364385                | -1.352858 | 0.236426  |
| 12            | 6             | 0           | 5.311390                | -1.784837 | -0.206223 |
| 13            | 1             | 0           | 5.253717                | -2.650526 | 0.441763  |
| 14            | 6             | 0           | 0.838216                | -2.484673 | -0.118736 |
| 15            | 6             | 0           | -0.484391               | -2.099940 | -0.446734 |
| 16            | 6             | 0           | -1.459526               | -3.005305 | 0.017372  |
| 17            | 1             | 0           | -2.505353               | -2.803810 | -0.165068 |
| 18            | 6             | 0           | -1.166471               | -4.172942 | 0.716496  |
| 19            | 1             | 0           | -1.983974               | -4.802223 | 1.051601  |
| 20            | 6             | 0           | 0.152780                | -4.521598 | 0.991260  |
| 21            | 1             | 0           | 0.395067                | -5.421512 | 1.544125  |
| 22            | 6             | 0           | 1.155306                | -3.669354 | 0.569133  |
| 23            | 1             | 0           | 2.191848                | -3.869323 | 0.805776  |
| 24            | 16            | 0           | -3.106672               | -1.619339 | -2.142307 |
| 25            | 6             | 0           | -4.037047               | -0.285932 | -3.016482 |
| 26            | 1             | 0           | -5.094834               | -0.408495 | -2.781844 |
| 27            | 1             | 0           | -3.907359               | -0.374440 | -4.099808 |
| 28            | 6             | 0           | -3.581614               | 1.094586  | -2.568197 |
| 29            | 1             | 0           | -4.078500               | 1.866743  | -3.175026 |
| 30            | 6             | 0           | -3.983168               | 1.381981  | -1.115792 |
| 31            | 8             | 0           | -3.031255               | 2.011148  | -0.428673 |
| 32            | 8             | 0           | -5.072283               | 1.095254  | -0.676613 |
| 33            | 7             | 0           | -2.105603               | 1.173135  | -2.735283 |
| 34            | 1             | 0           | -1.867740               | 1.053938  | -3.717445 |
| 35            | 1             | 0           | -1.771464               | 2.086456  | -2.444681 |
| 36            | 16            | 0           | 0.826883                | 1.004166  | -1.460664 |
| 37            | 6             | 0           | 0.252122                | 2.612284  | -0.723010 |
| 38            | 1             | 0           | 0.051036                | 3.316412  | -1.530144 |
| 39            | 1             | 0           | -0.659648               | 2.442052  | -0.152378 |
| 40            | 6             | 0           | 1.361118                | 3.161313  | 0.177881  |
| 41            | 1             | 0           | 2.259924                | 3.319148  | -0.426104 |
| 42            | 7             | 0           | 1.671970                | 2.168558  | 1.227903  |
| 43            | 1             | 0           | 0.890809                | 2.107190  | 1.892871  |
| 44            | 6             | 0           | 0.990236                | 4.505774  | 0.797964  |
| 45            | 8             | 0           | 0.977476                | 4.740798  | 1.976866  |

|    |    |   |           |           |           |    |    |   |           |          |           |
|----|----|---|-----------|-----------|-----------|----|----|---|-----------|----------|-----------|
| 46 | 8  | 0 | 0.694223  | 5.416959  | -0.155265 | 30 | 6  | 0 | -4.112284 | 0.988314 | -1.585748 |
| 47 | 1  | 0 | 7.469464  | 0.609039  | -1.280675 | 31 | 8  | 0 | -3.266371 | 1.796582 | -0.964351 |
| 48 | 1  | 0 | 0.481398  | 6.253008  | 0.287405  | 32 | 8  | 0 | -5.259870 | 0.787850 | -1.263155 |
| 49 | 1  | 0 | 2.500791  | 2.425147  | 1.758832  | 33 | 7  | 0 | -2.018396 | 0.464211 | -2.841290 |
| 50 | 1  | 0 | -3.256328 | 2.008738  | 0.570469  | 34 | 1  | 0 | -1.648757 | 0.156010 | -3.738383 |
| 51 | 1  | 0 | 3.347400  | 0.006704  | -2.335156 | 35 | 1  | 0 | -1.765612 | 1.441102 | -2.717354 |
| 52 | 17 | 0 | 2.417032  | -0.550536 | 2.629822  | 36 | 16 | 0 | 0.780080  | 0.858346 | -1.399587 |
| 53 | 1  | 0 | 0.181135  | -0.495936 | 2.820857  | 37 | 6  | 0 | 0.159161  | 2.544831 | -0.929025 |
| 54 | 7  | 0 | -3.459847 | 1.806154  | 2.197429  | 38 | 1  | 0 | 0.057863  | 3.141284 | -1.834698 |
| 55 | 6  | 0 | -2.920992 | 0.510455  | 2.662067  | 39 | 1  | 0 | -0.806601 | 2.444037 | -0.439871 |
| 56 | 1  | 0 | -4.455118 | 1.855365  | 2.395918  | 40 | 6  | 0 | 1.178284  | 3.200060 | 0.012483  |
| 57 | 1  | 0 | -2.996370 | 2.571882  | 2.679876  | 41 | 1  | 0 | 2.114940  | 3.355125 | -0.532994 |
| 58 | 6  | 0 | -3.502936 | -0.636306 | 1.807184  | 42 | 7  | 0 | 1.446975  | 2.307650 | 1.158594  |
| 59 | 1  | 0 | -3.173488 | 0.320886  | 3.713331  | 43 | 1  | 0 | 0.561402  | 2.161651 | 1.671927  |
| 60 | 6  | 0 | -1.397960 | 0.588400  | 2.606414  | 44 | 6  | 0 | 0.720328  | 4.573797 | 0.496411  |
| 61 | 16 | 0 | -3.682261 | -2.229186 | 2.692661  | 45 | 8  | 0 | 0.704221  | 4.928980 | 1.644098  |
| 62 | 1  | 0 | -2.929597 | -0.779695 | 0.891126  | 46 | 8  | 0 | 0.364479  | 5.365730 | -0.541056 |
| 63 | 1  | 0 | -4.514528 | -0.367510 | 1.499408  | 47 | 1  | 0 | 7.592348  | 0.756549 | -1.412572 |
| 64 | 8  | 0 | -0.819276 | 1.637066  | 2.382867  | 48 | 1  | 0 | 0.111573  | 6.229421 | -0.180209 |
| 65 | 8  | 0 | -0.805991 | -0.564643 | 2.858227  | 49 | 1  | 0 | 2.137139  | 2.696730 | 1.797374  |
| 66 | 1  | 0 | -2.366085 | -2.500483 | 2.779785  | 50 | 1  | 0 | -3.609408 | 2.034946 | -0.005315 |

HF=-3453.6795841\ZeroPoint=0.4609432\Thermal=0.5034082

G = 3.5 kcal mol<sup>-1</sup>

| Center Number | Atomic Number | Atomic Type | Coordinates (Angstroms) |           |           |
|---------------|---------------|-------------|-------------------------|-----------|-----------|
|               |               |             | X                       | Y         | Z         |
| 1             | 46            | 0           | 1.927235                | 0.387985  | 0.563316  |
| 2             | 46            | 0           | -1.068386               | -0.697831 | -1.308922 |
| 3             | 7             | 0           | 2.199838                | -1.563018 | -0.017466 |
| 4             | 7             | 0           | 3.253362                | -2.079910 | -0.438424 |
| 5             | 6             | 0           | 4.372236                | -1.262039 | -0.709478 |
| 6             | 6             | 0           | 4.314171                | -0.131279 | -1.532786 |
| 7             | 6             | 0           | 5.480700                | 0.581727  | -1.789970 |
| 8             | 1             | 0           | 5.443202                | 1.447132  | -2.441746 |
| 9             | 6             | 0           | 6.690314                | 0.187688  | -1.219111 |
| 10            | 6             | 0           | 6.742641                | -0.951111 | -0.414088 |
| 11            | 1             | 0           | 7.681695                | -1.263918 | 0.026778  |
| 12            | 6             | 0           | 5.593176                | -1.696640 | -0.183777 |
| 13            | 1             | 0           | 5.616702                | -2.587751 | 0.430819  |
| 14            | 6             | 0           | 1.133651                | -2.487800 | 0.291631  |
| 15            | 6             | 0           | -0.227137               | -2.082019 | 0.285042  |
| 16            | 6             | 0           | -1.148413               | -3.059090 | 0.722470  |
| 17            | 1             | 0           | -2.191657               | -2.781882 | 0.794232  |
| 18            | 6             | 0           | -0.779241               | -4.340436 | 1.108287  |
| 19            | 1             | 0           | -1.534473               | -5.042155 | 1.443040  |
| 20            | 6             | 0           | 0.565156                | -4.702083 | 1.081504  |
| 21            | 1             | 0           | 0.878189                | -5.691493 | 1.394909  |
| 22            | 6             | 0           | 1.517909                | -3.774794 | 0.684901  |
| 23            | 1             | 0           | 2.569321                | -4.024535 | 0.704435  |
| 24            | 16            | 0           | -2.956665               | -2.079816 | -1.544674 |
| 25            | 6             | 0           | -3.834422               | -1.161951 | -2.885512 |
| 26            | 1             | 0           | -4.906084               | -1.299179 | -2.737728 |
| 27            | 1             | 0           | -3.559754               | -1.565016 | -3.864778 |
| 28            | 6             | 0           | -3.504749               | 0.319970  | -2.828789 |
| 29            | 1             | 0           | -3.932430               | 0.840269  | -3.697640 |

|    |    |   |           |           |           |    |    |   |           |           |           |
|----|----|---|-----------|-----------|-----------|----|----|---|-----------|-----------|-----------|
| 51 | 1  | 0 | 3.380631  | 0.160081  | -1.992346 | 51 | 1  | 0 | 3.380631  | 0.160081  | -1.992346 |
| 52 | 17 | 0 | 3.166443  | 0.046040  | 2.526865  | 52 | 17 | 0 | 3.166443  | 0.046040  | 2.526865  |
| 53 | 1  | 0 | -0.698595 | -0.939062 | 0.922321  | 53 | 1  | 0 | -0.698595 | -0.939062 | 0.922321  |
| 54 | 7  | 0 | -3.845137 | 2.192949  | 1.551702  | 54 | 7  | 0 | -3.845137 | 2.192949  | 1.551702  |
| 55 | 6  | 0 | -3.370936 | 0.956016  | 2.228315  | 55 | 6  | 0 | -3.370936 | 0.956016  | 2.228315  |
| 56 | 1  | 0 | -4.804090 | 2.398271  | 1.817613  | 56 | 1  | 0 | -4.804090 | 2.398271  | 1.817613  |
| 57 | 1  | 0 | -3.254423 | 2.967528  | 1.846290  | 57 | 1  | 0 | -3.254423 | 2.967528  | 1.846290  |
| 58 | 6  | 0 | -4.210368 | -0.248483 | 1.782768  | 58 | 6  | 0 | -4.210368 | -0.248483 | 1.782768  |
| 59 | 1  | 0 | -3.443918 | 1.058205  | 3.318484  | 59 | 1  | 0 | -3.443918 | 1.058205  | 3.318484  |
| 60 | 6  | 0 | -1.865815 | 0.809436  | 1.901200  | 60 | 6  | 0 | -1.865815 | 0.809436  | 1.901200  |
| 61 | 16 | 0 | -4.211568 | -1.637647 | 2.986556  | 61 | 16 | 0 | -4.211568 | -1.637647 | 2.986556  |
| 62 | 1  | 0 | -3.889702 | -0.617026 | 0.808920  | 62 | 1  | 0 | -3.889702 | -0.617026 | 0.808920  |
| 63 | 1  | 0 | -5.259191 | 0.040978  | 1.693260  | 63 | 1  | 0 | -5.259191 | 0.040978  | 1.693260  |
| 64 | 8  | 0 | -1.214844 | 1.849109  | 1.736679  | 64 | 8  | 0 | -1.214844 | 1.849109  | 1.736679  |
| 65 | 8  | 0 | -1.431559 | -0.392583 | 1.841523  | 65 | 8  | 0 | -1.431559 | -0.392583 | 1.841523  |
| 66 | 1  | 0 | -2.877548 | -1.824425 | 2.967645  | 66 | 1  | 0 | -2.877548 | -1.824425 | 2.967645  |

HF=-3453.6421267\ZeroPoint=0.4560732\Thermal=0.4979856

G = -14.3 kcal mol<sup>-1</sup>

| Center Number | Atomic Number | Atomic Type | Coordinates (Angstroms) |           |           |
|---------------|---------------|-------------|-------------------------|-----------|-----------|
|               |               |             | X                       | Y         | Z         |
| 1             | 46            | 0           | 1.959518                | 0.501745  | 0.328550  |
| 2             | 46            | 0           | -1.309494               | -1.163501 | -0.940085 |
| 3             | 7             | 0           | 2.481144                | -1.511572 | 0.202846  |
| 4             | 7             | 0           | 3.612989                | -2.028326 | 0.054916  |
| 5             | 6             | 0           | 4.711635                | -1.218013 | -0.261406 |
| 6             | 6             | 0           | 4.649205                | -0.135056 | -1.151664 |
| 7             | 6             | 0           | 5.805041                | 0.581299  | -1.432369 |
| 8             | 1             | 0           | 5.765495                | 1.410136  | -2.129514 |
| 9             | 6             | 0           | 7.012074                | 0.239238  | -0.821286 |
| 10            | 6             | 0           | 7.075181                | -0.853947 | 0.045087  |
| 11            | 1             | 0           | 8.014645                | -1.124832 | 0.511805  |
| 12            | 6             | 0           | 5.935579                | -1.603239 | 0.301654  |
| 13            | 1             | 0           | 5.960604                | -2.460194 | 0.963291  |

|    |    |   |           |           |           | Center | Atomic | Atomic | Coordinates (Angstroms) |           |           |
|----|----|---|-----------|-----------|-----------|--------|--------|--------|-------------------------|-----------|-----------|
|    |    |   |           |           |           | Number | Number | Type   | X                       | Y         | Z         |
| 14 | 6  | 0 | 1.402059  | -2.439874 | 0.368159  |        |        |        |                         |           |           |
| 15 | 6  | 0 | 0.215177  | -1.960336 | 0.969015  |        |        |        |                         |           |           |
| 16 | 6  | 0 | -0.846600 | -2.846896 | 1.172587  |        |        |        |                         |           |           |
| 17 | 1  | 0 | -1.715938 | -2.510200 | 1.723723  | 1      | 46     | 0      | -1.817255               | 0.296192  | 0.310634  |
| 18 | 6  | 0 | -0.744392 | -4.184461 | 0.749645  | 2      | 46     | 0      | 1.312980                | -1.463365 | -0.055856 |
| 19 | 1  | 0 | -1.580589 | -4.855772 | 0.895791  | 3      | 7      | 0      | -1.972294               | -0.900438 | -1.347248 |
| 20 | 6  | 0 | 0.422811  | -4.629489 | 0.147266  | 4      | 7      | 0      | -2.933587               | -1.559989 | -1.781441 |
| 21 | 1  | 0 | 0.502693  | -5.657728 | -0.185655 | 5      | 6      | 0      | -4.070938               | -1.758333 | -0.964684 |
| 22 | 6  | 0 | 1.502021  | -3.762154 | -0.048615 | 6      | 6      | 0      | -4.002629               | -2.172020 | 0.371297  |
| 23 | 1  | 0 | 2.411709  | -4.104601 | -0.523343 | 7      | 6      | 0      | -5.182449               | -2.392219 | 1.074003  |
| 24 | 16 | 0 | -3.230320 | -2.479416 | -0.669436 | 8      | 1      | 0      | -5.133561               | -2.731348 | 2.102304  |
| 25 | 6  | 0 | -4.239070 | -1.850643 | -2.081374 | 9      | 6      | 0      | -6.419463               | -2.186768 | 0.462608  |
| 26 | 1  | 0 | -5.284398 | -1.864958 | -1.770102 | 10     | 6      | 0      | -6.479659               | -1.793145 | -0.874663 |
| 27 | 1  | 0 | -4.112196 | -2.508032 | -2.945878 | 11     | 1      | 0      | -7.438769               | -1.644215 | -1.356414 |
| 28 | 6  | 0 | -3.846138 | -0.431173 | -2.425514 | 12     | 6      | 0      | -5.308278               | -1.607797 | -1.599576 |
| 29 | 1  | 0 | -4.294115 | -0.130763 | -3.383410 | 13     | 1      | 0      | -5.334083               | -1.321304 | -2.643713 |
| 30 | 6  | 0 | -4.304048 | 0.624067  | -1.384483 | 14     | 6      | 0      | -0.892219               | -0.669559 | -2.283131 |
| 31 | 8  | 0 | -3.448229 | 1.558560  | -1.179567 | 15     | 6      | 0      | 0.466566                | -0.722425 | -1.873720 |
| 32 | 8  | 0 | -5.411945 | 0.506939  | -0.867578 | 16     | 6      | 0      | 1.358141                | -0.370513 | -2.916948 |
| 33 | 7  | 0 | -2.355485 | -0.352928 | -2.556242 | 17     | 1      | 0      | 2.424089                | -0.370656 | -2.739699 |
| 34 | 1  | 0 | -2.031453 | -0.819309 | -3.400791 | 18     | 6      | 0      | 0.967162                | 0.012770  | -4.198276 |
| 35 | 1  | 0 | -2.116471 | 0.636802  | -2.602020 | 19     | 1      | 0      | 1.722681                | 0.280870  | -4.930055 |
| 36 | 16 | 0 | 0.540521  | 0.325149  | -1.529468 | 20     | 6      | 0      | -0.385041               | 0.056256  | -4.535825 |
| 37 | 6  | 0 | -0.160309 | 2.048109  | -1.459216 | 21     | 1      | 0      | -0.708899               | 0.360630  | -5.524210 |
| 38 | 1  | 0 | -0.388752 | 2.368368  | -2.474659 | 22     | 6      | 0      | -1.313978               | -0.298345 | -3.572257 |
| 39 | 1  | 0 | -1.074335 | 2.041602  | -0.871661 | 23     | 1      | 0      | -2.374742               | -0.259749 | -3.782812 |
| 40 | 6  | 0 | 0.873446  | 2.984576  | -0.836370 | 24     | 16     | 0      | 2.355445                | -2.594530 | 1.768216  |
| 41 | 1  | 0 | 1.752657  | 3.035401  | -1.489046 | 25     | 6      | 0      | 4.046459                | -2.698127 | 1.051990  |
| 42 | 7  | 0 | 1.300989  | 2.449965  | 0.475089  | 26     | 1      | 0      | 4.122737                | -3.558295 | 0.379136  |
| 43 | 1  | 0 | 0.463556  | 2.466252  | 1.094341  | 27     | 1      | 0      | 4.764210                | -2.830008 | 1.862802  |
| 44 | 6  | 0 | 0.395008  | 4.428383  | -0.677447 | 28     | 6      | 0      | 4.348601                | -1.413384 | 0.284610  |
| 45 | 8  | 0 | 0.765667  | 5.165134  | 0.196451  | 29     | 1      | 0      | 4.312082                | -0.563666 | 0.968425  |
| 46 | 8  | 0 | -0.436745 | 4.803278  | -1.673520 | 30     | 6      | 0      | 5.724474                | -1.472420 | -0.362127 |
| 47 | 1  | 0 | 7.906556  | 0.813653  | -1.032866 | 31     | 8      | 0      | 6.708637                | -1.363539 | 0.553317  |
| 48 | 1  | 0 | -0.662698 | 5.735219  | -1.529990 | 32     | 8      | 0      | 5.930953                | -1.633247 | -1.541432 |
| 49 | 1  | 0 | 2.011297  | 3.041277  | 0.903709  | 33     | 7      | 0      | 3.315764                | -1.184318 | -0.752639 |
| 50 | 1  | 0 | -3.765380 | 2.162149  | 0.123789  | 34     | 1      | 0      | 3.332639                | -0.181938 | -0.968756 |
| 51 | 1  | 0 | 3.715539  | 0.111259  | -1.639915 | 35     | 1      | 0      | 3.557992                | -1.714121 | -1.588048 |
| 52 | 17 | 0 | 3.411445  | 0.858396  | 2.134781  | 36     | 16     | 0      | -0.575818               | -1.344044 | 1.341232  |
| 53 | 1  | 0 | 0.172414  | -0.969775 | 1.409441  | 37     | 6      | 0      | 0.094910                | -0.274274 | 2.713295  |
| 54 | 7  | 0 | -3.890406 | 2.527428  | 1.162008  | 38     | 1      | 0      | 0.383189                | -0.925853 | 3.534065  |
| 55 | 6  | 0 | -3.256480 | 1.561937  | 2.128878  | 39     | 1      | 0      | 0.968286                | 0.256321  | 2.338175  |
| 56 | 1  | 0 | -4.881369 | 2.673519  | 1.344689  | 40     | 6      | 0      | -0.988602               | 0.720901  | 3.124822  |
| 57 | 1  | 0 | -3.362770 | 3.401852  | 1.227358  | 41     | 1      | 0      | -1.870231               | 0.179257  | 3.483047  |
| 58 | 6  | 0 | -3.893249 | 0.179116  | 2.019354  | 42     | 7      | 0      | -1.373048               | 1.514772  | 1.936669  |
| 59 | 1  | 0 | -3.402937 | 1.964291  | 3.135299  | 43     | 1      | 0      | -0.547673               | 2.030403  | 1.599776  |
| 60 | 6  | 0 | -1.727889 | 1.602360  | 1.821683  | 44     | 6      | 0      | -0.540862               | 1.641654  | 4.256406  |
| 61 | 16 | 0 | -3.547184 | -0.866436 | 3.490776  | 45     | 8      | 0      | -0.595745               | 2.842951  | 4.220677  |
| 62 | 1  | 0 | -3.556763 | -0.339589 | 1.125114  | 46     | 8      | 0      | -0.106355               | 0.936632  | 5.320334  |
| 63 | 1  | 0 | -4.980935 | 0.251524  | 1.962161  | 47     | 1      | 0      | -7.333837               | -2.350392 | 1.021085  |
| 64 | 8  | 0 | -1.299595 | 2.732177  | 1.455023  | 48     | 1      | 0      | 0.158937                | 1.566331  | 6.008184  |
| 65 | 8  | 0 | -1.080805 | 0.551232  | 1.955025  | 49     | 1      | 0      | -2.102214               | 2.191973  | 2.148637  |
| 66 | 1  | 0 | -2.207766 | -0.721578 | 3.409223  | 50     | 1      | 0      | 7.555578                | -1.442762 | 0.088477  |
|    |    |   |           |           |           | 51     | 1      | 0      | -3.045686               | -2.356513 | 0.837982  |
|    |    |   |           |           |           | 52     | 17     | 0      | -2.982075               | 2.086340  | -0.775246 |
|    |    |   |           |           |           | 53     | 1      | 0      | -0.180420               | 1.524902  | -1.824396 |
|    |    |   |           |           |           | 54     | 7      | 0      | 0.010557                | 2.532828  | -1.752817 |
|    |    |   |           |           |           | 55     | 6      | 0      | 1.482694                | 2.764527  | -1.578380 |

HF=-3453.6730648\ZeroPoint=0.4606143\Thermal=0.5030662

G = -6.1 kcal mol<sup>-1</sup>

|                                                        |        |        |                         |           |           |                                                        |        |        |                         |           |           |
|--------------------------------------------------------|--------|--------|-------------------------|-----------|-----------|--------------------------------------------------------|--------|--------|-------------------------|-----------|-----------|
| 56                                                     | 6      | 0      | 1.808287                | 4.255542  | -1.583733 | 40                                                     | 6      | 0      | 1.179282                | 2.646032  | -1.514983 |
| 57                                                     | 1      | 0      | 1.981618                | 2.282841  | -2.417768 | 41                                                     | 1      | 0      | 2.079246                | 2.455139  | -2.110001 |
| 58                                                     | 6      | 0      | 1.931693                | 2.060236  | -0.254381 | 42                                                     | 7      | 0      | 1.433177                | 2.208595  | -0.126295 |
| 59                                                     | 16     | 0      | 0.875698                | 5.192011  | -0.277575 | 43                                                     | 1      | 0      | 0.566485                | 2.329881  | 0.436025  |
| 60                                                     | 1      | 0      | 1.569478                | 4.696643  | -2.553896 | 44                                                     | 6      | 0      | 0.946929                | 4.154841  | -1.562179 |
| 61                                                     | 1      | 0      | 2.880205                | 4.356561  | -1.413471 | 45                                                     | 8      | 0      | 1.164585                | 4.904892  | -0.648377 |
| 62                                                     | 8      | 0      | 1.075592                | 2.070105  | 0.659554  | 46                                                     | 8      | 0      | 0.512393                | 4.550589  | -2.776984 |
| 63                                                     | 8      | 0      | 3.086454                | 1.603060  | -0.275345 | 47                                                     | 1      | 0      | 7.328555                | -0.322009 | -1.771881 |
| 64                                                     | 1      | 0      | 0.648907                | 6.281036  | -1.038723 | 48                                                     | 1      | 0      | 0.400957                | 5.513523  | -2.753279 |
| 65                                                     | 1      | 0      | -0.512029               | 2.859991  | -0.929758 | 49                                                     | 1      | 0      | 2.173658                | 2.750740  | 0.313524  |
| 66                                                     | 1      | 0      | -0.390996               | 2.987213  | -2.573436 | 50                                                     | 1      | 0      | -7.726832               | 0.001588  | -0.242066 |
| -----                                                  |        |        |                         |           |           |                                                        |        |        |                         |           |           |
| HF=-3453.6571312\ZeroPoint=0.4610922\Thermal=0.5047559 |        |        |                         |           |           |                                                        |        |        |                         |           |           |
| G = 5.8 kcal mol <sup>-1</sup>                         |        |        |                         |           |           |                                                        |        |        |                         |           |           |
| -----                                                  |        |        |                         |           |           |                                                        |        |        |                         |           |           |
| Center                                                 | Atomic | Atomic | Coordinates (Angstroms) |           |           |                                                        |        |        |                         |           |           |
| Number                                                 | Number | Type   | X                       | Y         | Z         |                                                        |        |        |                         |           |           |
| -----                                                  |        |        |                         |           |           |                                                        |        |        |                         |           |           |
| 1                                                      | 46     | 0      | 1.750081                | 0.166366  | -0.034406 | 51                                                     | 1      | 0      | 3.113809                | -0.998581 | -2.232290 |
| 2                                                      | 46     | 0      | -1.572015               | -0.709483 | -0.790570 | 52                                                     | 17     | 0      | 3.128229                | 0.428316  | 1.896582  |
| 3                                                      | 7      | 0      | 1.839877                | -1.912406 | 0.096841  | 53                                                     | 1      | 0      | -0.352792               | -0.753444 | 1.661001  |
| 4                                                      | 7      | 0      | 2.894042                | -2.574809 | -0.032105 | 54                                                     | 7      | 0      | -0.095907               | 0.090206  | 2.627774  |
| 5                                                      | 6      | 0      | 4.044954                | -1.933385 | -0.524368 | 55                                                     | 6      | 0      | -1.213111               | 0.981946  | 3.008660  |
| 6                                                      | 6      | 0      | 4.030657                | -1.130251 | -1.673952 | 56                                                     | 6      | 0      | -0.763329               | 2.107644  | 3.956705  |
| 7                                                      | 6      | 0      | 5.219445                | -0.563824 | -2.121919 | 57                                                     | 1      | 0      | -1.949424               | 0.376951  | 3.542414  |
| 8                                                      | 1      | 0      | 5.217084                | 0.040739  | -3.021593 | 58                                                     | 6      | 0      | -1.903445               | 1.503263  | 1.714923  |
| 9                                                      | 6      | 0      | 6.408293                | -0.777768 | -1.425324 | 59                                                     | 16     | 0      | 0.633257                | 3.165721  | 3.378273  |
| 10                                                     | 6      | 0      | 6.418772                | -1.597391 | -0.294812 | 60                                                     | 1      | 0      | -0.495913               | 1.696115  | 4.932803  |
| 11                                                     | 1      | 0      | 7.343458                | -1.770273 | 0.242841  | 61                                                     | 1      | 0      | -1.602041               | 2.789572  | 4.108066  |
| 12                                                     | 6      | 0      | 5.246735                | -2.201763 | 0.139942  | 62                                                     | 8      | 0      | -1.148353               | 1.966510  | 0.826271  |
| 13                                                     | 1      | 0      | 5.234305                | -2.843643 | 1.011822  | 63                                                     | 8      | 0      | -3.145504               | 1.366546  | 1.681049  |
| 14                                                     | 6      | 0      | 0.676962                | -2.658599 | 0.522379  | 64                                                     | 1      | 0      | 1.630060                | 2.294039  | 3.641213  |
| 15                                                     | 6      | 0      | -0.491560               | -1.959276 | 0.913687  | 65                                                     | 1      | 0      | 0.701325                | 0.630479  | 2.285128  |
| 16                                                     | 6      | 0      | -1.495160               | -2.761571 | 1.502467  | 66                                                     | 1      | 0      | 0.251130                | -0.451864 | 3.417466  |
| 17                                                     | 1      | 0      | -2.367124               | -2.275084 | 1.927777  | -----                                                  |        |        |                         |           |           |
| 18                                                     | 6      | 0      | -1.416497               | -4.145240 | 1.588370  | HF=-3453.6371721\ZeroPoint=0.4568772\Thermal=0.4996478 |        |        |                         |           |           |
| 19                                                     | 1      | 0      | -2.226090               | -4.713709 | 2.033361  | G = -34.1 kcal mol <sup>-1</sup>                       |        |        |                         |           |           |
| 20                                                     | 6      | 0      | -0.286330               | -4.799820 | 1.090289  | -----                                                  |        |        |                         |           |           |
| 21                                                     | 1      | 0      | -0.218303               | -5.881066 | 1.122820  | Center                                                 | Atomic | Atomic | Coordinates (Angstroms) |           |           |
| 22                                                     | 6      | 0      | 0.765350                | -4.059275 | 0.576216  | Number                                                 | Number | Type   | X                       | Y         | Z         |
| 23                                                     | 1      | 0      | 1.662700                | -4.550482 | 0.226198  | -----                                                  |        |        |                         |           |           |
| 24                                                     | 16     | 0      | -2.719822               | -0.148493 | -2.737623 | 1                                                      | 46     | 0      | 1.798737                | -0.226143 | 0.320921  |
| 25                                                     | 6      | 0      | -4.425797               | -0.526517 | -2.158941 | 2                                                      | 46     | 0      | -1.566711               | 0.094756  | -0.954799 |
| 26                                                     | 1      | 0      | -4.649835               | -1.586050 | -2.315718 | 3                                                      | 7      | 0      | 1.006994                | -2.067675 | 0.855486  |
| 27                                                     | 1      | 0      | -5.122491               | 0.067725  | -2.752046 | 4                                                      | 7      | 0      | 1.553413                | -3.186422 | 0.794423  |
| 28                                                     | 6      | 0      | -4.548958               | -0.176923 | -0.680014 | 5                                                      | 6      | 0      | 2.821377                | -3.295313 | 0.179129  |
| 29                                                     | 1      | 0      | -4.380601               | 0.890158  | -0.526016 | 6                                                      | 6      | 0      | 3.086082                | -2.802367 | -1.103974 |
| 30                                                     | 6      | 0      | -5.924653               | -0.546857 | -0.145498 | 7                                                      | 6      | 0      | 4.347790                | -2.997473 | -1.657936 |
| 31                                                     | 8      | 0      | -6.873491               | 0.297622  | -0.594207 | 8                                                      | 1      | 0      | 4.551316                | -2.636923 | -2.659734 |
| 32                                                     | 8      | 0      | -6.157687               | -1.496626 | 0.562758  | 9                                                      | 6      | 0      | 5.340838                | -3.657788 | -0.935560 |
| 33                                                     | 7      | 0      | -3.503155               | -0.891762 | 0.090317  | 10                                                     | 6      | 0      | 5.061957                | -4.161210 | 0.336445  |
| 34                                                     | 1      | 0      | -3.434497               | -0.403450 | 0.992050  | 11                                                     | 1      | 0      | 5.829816                | -4.681967 | 0.896152  |
| 35                                                     | 1      | 0      | -3.800478               | -1.852253 | 0.251260  | 12                                                     | 6      | 0      | 3.794378                | -4.009838 | 0.884885  |
| 36                                                     | 16     | 0      | 0.375585                | 0.021348  | -1.891271 | 13                                                     | 1      | 0      | 3.553900                | -4.403275 | 1.864664  |
| 37                                                     | 6      | 0      | 0.010196                | 1.842923  | -2.083054 | 14                                                     | 6      | 0      | -0.321756               | -2.073966 | 1.410514  |
| 38                                                     | 1      | 0      | -0.133174               | 2.043789  | -3.141796 | 15                                                     | 6      | 0      | -0.682847               | -1.064465 | 2.301366  |
| 39                                                     | 1      | 0      | -0.902621               | 2.062086  | -1.533477 | 16                                                     | 6      | 0      | -1.971890               | -1.059179 | 2.825103  |
|                                                        |        |        |                         |           |           | 17                                                     | 1      | 0      | -2.252693               | -0.275739 | 3.518548  |
|                                                        |        |        |                         |           |           | 18                                                     | 6      | 0      | -2.892959               | -2.035770 | 2.444765  |
|                                                        |        |        |                         |           |           | 19                                                     | 1      | 0      | -3.905213               | -2.009993 | 2.831222  |
|                                                        |        |        |                         |           |           | 20                                                     | 6      | 0      | -2.519477               | -3.033512 | 1.540240  |
|                                                        |        |        |                         |           |           | 21                                                     | 1      | 0      | -3.238710               | -3.782885 | 1.231196  |
|                                                        |        |        |                         |           |           | 22                                                     | 6      | 0      | -1.230297               | -3.062228 | 1.022476  |
|                                                        |        |        |                         |           |           | 23                                                     | 1      | 0      | -0.932092               | -3.809983 | 0.299812  |

|                                                        |        |        |                         |           |           |    |    |    |           |           |           |           |
|--------------------------------------------------------|--------|--------|-------------------------|-----------|-----------|----|----|----|-----------|-----------|-----------|-----------|
| 24                                                     | 16     | 0      | -2.337426               | -1.435483 | -2.502754 | 8  | 1  | 0  | 5.988842  | -1.938275 | -1.993235 |           |
| 25                                                     | 6      | 0      | -3.990335               | -1.733623 | -1.739716 | 9  | 6  | 0  | 7.117145  | -0.999156 | -0.417394 |           |
| 26                                                     | 1      | 0      | -3.906514               | -2.487272 | -0.951775 | 10 | 6  | 0  | 7.074169  | -0.463386 | 0.870333  |           |
| 27                                                     | 1      | 0      | -4.662362               | -2.109101 | -2.512980 | 11 | 1  | 0  | 7.977396  | -0.082738 | 1.332417  |           |
| 28                                                     | 6      | 0      | -4.535831               | -0.433537 | -1.134381 | 12 | 6  | 0  | 5.874865  | -0.426214 | 1.571899  |           |
| 29                                                     | 1      | 0      | -4.708487               | 0.291001  | -1.930907 | 13 | 1  | 0  | 5.824275  | -0.023301 | 2.575632  |           |
| 30                                                     | 6      | 0      | -5.840841               | -0.717999 | -0.404062 | 14 | 6  | 0  | 1.351888  | -0.248965 | 2.132014  |           |
| 31                                                     | 8      | 0      | -6.889272               | -0.749141 | -1.253072 | 15 | 6  | 0  | 0.043383  | -0.582773 | 1.702044  |           |
| 32                                                     | 8      | 0      | -5.933803               | -0.940250 | 0.778086  | 16 | 6  | 0  | -0.912698 | -0.428780 | 2.736605  |           |
| 33                                                     | 7      | 0      | -3.531245               | 0.113701  | -0.204049 | 17 | 1  | 0  | -1.949189 | -0.680277 | 2.563949  |           |
| 34                                                     | 1      | 0      | -3.690898               | 1.090098  | 0.077775  | 18 | 6  | 0  | -0.630434 | 0.037232  | 4.023615  |           |
| 35                                                     | 1      | 0      | -3.524928               | -0.438152 | 0.654556  | 19 | 1  | 0  | -1.436710 | 0.136413  | 4.743307  |           |
| 36                                                     | 16     | 0      | 0.638326                | -0.078595 | -1.738500 | 20 | 6  | 0  | 0.670986  | 0.380521  | 4.370255  |           |
| 37                                                     | 6      | 0      | 1.085012                | 1.683429  | -2.111350 | 21 | 1  | 0  | 0.910491  | 0.766481  | 5.353690  |           |
| 38                                                     | 1      | 0      | 1.013635                | 1.835225  | -3.186225 | 22 | 6  | 0  | 1.662166  | 0.222402  | 3.416979  |           |
| 39                                                     | 1      | 0      | 0.380927                | 2.336390  | -1.596216 | 23 | 1  | 0  | 2.686662  | 0.492501  | 3.636902  |           |
| 40                                                     | 6      | 0      | 2.501850                | 1.939674  | -1.604138 | 24 | 16 | 0  | -1.558982 | -2.465831 | -2.116115 |           |
| 41                                                     | 1      | 0      | 3.194610                | 1.250783  | -2.099349 | 25 | 6  | 0  | -2.836624 | -3.451084 | -1.243832 |           |
| 42                                                     | 7      | 0      | 2.526024                | 1.658230  | -0.153218 | 26 | 1  | 0  | -2.384181 | -4.305719 | -0.731435 |           |
| 43                                                     | 1      | 0      | 1.906965                | 2.333206  | 0.312303  | 27 | 1  | 0  | -3.555092 | -3.827496 | -1.973708 |           |
| 44                                                     | 6      | 0      | 3.024990                | 3.347157  | -1.880916 | 28 | 6  | 0  | -3.539412 | -2.552971 | -0.224085 |           |
| 45                                                     | 8      | 0      | 3.592981                | 4.031308  | -1.069030 | 29 | 1  | 0  | -4.019175 | -1.732126 | -0.759476 |           |
| 46                                                     | 8      | 0      | 2.816251                | 3.712497  | -3.159619 | 30 | 6  | 0  | -4.595397 | -3.324772 | 0.552514  |           |
| 47                                                     | 1      | 0      | 6.324887                | -3.795794 | -1.368468 | 31 | 8  | 0  | -4.484888 | -3.693508 | 1.696692  |           |
| 48                                                     | 1      | 0      | 3.190023                | 4.598987  | -3.283090 | 32 | 8  | 0  | -5.675621 | -3.590416 | -0.211351 |           |
| 49                                                     | 1      | 0      | 3.454307                | 1.786050  | 0.246734  | 33 | 7  | 0  | -2.547878 | -1.968550 | 0.707900  |           |
| 50                                                     | 1      | 0      | -7.679590               | -0.983416 | -0.742383 | 34 | 1  | 0  | -2.929685 | -1.096722 | 1.069974  |           |
| 51                                                     | 1      | 0      | 2.305207                | -2.318562 | -1.673745 | 35 | 1  | 0  | -2.403898 | -2.605473 | 1.490330  |           |
| 52                                                     | 17     | 0      | 3.038072                | -0.129290 | 2.323717  | 36 | 16 | 0  | 1.252609  | -1.013909 | -1.433752 |           |
| 53                                                     | 1      | 0      | 0.021140                | -0.297689 | 2.590735  | 37 | 6  | 0  | 0.814854  | -0.193802 | -3.043563 |           |
| 54                                                     | 7      | 0      | 0.072896                | 2.206150  | 2.975653  | 38 | 1  | 0  | 1.606620  | -0.486822 | -3.736329 |           |
| 55                                                     | 6      | 0      | -0.959063               | 3.023541  | 2.356900  | 39 | 1  | 0  | -0.132149 | -0.593750 | -3.402519 |           |
| 56                                                     | 6      | 0      | -0.549916               | 4.450857  | 1.924012  | 40 | 6  | 0  | 0.753299  | 1.328591  | -2.948109 |           |
| 57                                                     | 1      | 0      | -1.763115               | 3.166484  | 3.086137  | 41 | 1  | 0  | 0.752827  | 1.732473  | -3.970798 |           |
| 58                                                     | 6      | 0      | -1.620642               | 2.297441  | 1.167951  | 42 | 7  | 0  | 1.917567  | 1.870043  | -2.194097 |           |
| 59                                                     | 16     | 0      | 0.837893                | 4.566670  | 0.709821  | 43 | 1  | 0  | 1.713744  | 2.817409  | -1.870243 |           |
| 60                                                     | 1      | 0      | -0.268873               | 5.043875  | 2.796252  | 44 | 6  | 0  | -0.520506 | 1.889154  | -2.307031 |           |
| 61                                                     | 1      | 0      | -1.400617               | 4.941291  | 1.446709  | 45 | 8  | 0  | -0.482358 | 2.841789  | -1.554007 |           |
| 62                                                     | 8      | 0      | -0.847183               | 1.519195  | 0.504753  | 46 | 8  | 0  | -1.608909 | 1.281599  | -2.723779 |           |
| 63                                                     | 8      | 0      | -2.813227               | 2.537810  | 0.935077  | 47 | 1  | 0  | 8.057473  | -1.044146 | -0.954630 |           |
| 64                                                     | 1      | 0      | 1.855970                | 4.594987  | 1.591392  | 48 | 1  | 0  | -2.433014 | 1.691183  | -2.287341 |           |
| 65                                                     | 1      | 0      | 0.758367                | 1.882896  | 2.302489  | 49 | 1  | 0  | 2.755872  | 1.902951  | -2.768345 |           |
| 66                                                     | 1      | 0      | 0.558868                | 2.697510  | 3.718175  | 50 | 1  | 0  | 3.837743  | -1.825987 | -0.773750 |           |
| -----                                                  |        |        |                         |           |           |    | 51 | 17 | 0         | 3.467138  | 2.616227  | 0.470192  |
| HF=-3453.7021716\ZeroPoint=0.4603064\Thermal=0.5038509 |        |        |                         |           |           |    | 52 | 1  | 0         | -1.435192 | 1.480180  | 1.930960  |
| G = -12.4 kcal mol <sup>-1</sup>                       |        |        |                         |           |           |    | 53 | 7  | 0         | -3.747017 | 2.415680  | -1.494512 |
| -----                                                  |        |        |                         |           |           |    | 54 | 6  | 0         | -3.272669 | 3.011627  | -0.238137 |
| Center                                                 | Atomic | Atomic | Coordinates (Angstroms) |           |           | 55 | 1  | 0  | -4.475362 | 1.733745  | -1.290204 |           |
| Number                                                 | Number | Type   | X                       | Y         | Z         | 56 | 1  | 0  | -4.168258 | 3.133174  | -2.079014 |           |
| -----                                                  |        |        |                         |           |           |    | 57 | 6  | 0         | -4.305193 | 3.880441  | 0.516578  |
| 1                                                      | 46     | 0      | 2.312372                | 0.773937  | -0.457848 | 58 | 1  | 0  | -2.406080 | 3.634342  | -0.462915 |           |
| 2                                                      | 46     | 0      | -0.659760               | -1.399849 | -0.167791 | 59 | 6  | 0  | -2.793254 | 1.884592  | 0.663279  |           |
| 3                                                      | 7      | 0      | 2.497325                | -0.318862 | 1.248925  | 60 | 16 | 0  | -5.935530 | 3.092382  | 0.844998  |           |
| 4                                                      | 7      | 0      | 3.521605                | -0.829037 | 1.734867  | 61 | 1  | 0  | -4.544361 | 4.753187  | -0.095433 |           |
| 5                                                      | 6      | 0      | 4.703842                | -0.873677 | 0.955400  | 62 | 1  | 0  | -3.868922 | 4.243439  | 1.448680  |           |
| 6                                                      | 6      | 0      | 4.738833                | -1.426513 | -0.329344 | 63 | 8  | 0  | -3.341403 | 0.799385  | 0.697673  |           |
| 7                                                      | 6      | 0      | 5.953203                | -1.493706 | -1.005183 | 64 | 8  | 0  | -1.769706 | 2.247468  | 1.419953  |           |
| -----                                                  |        |        |                         |           |           |    | 65 | 1  | 0         | -5.474246 | 2.072721  | 1.597694  |

66 1 0 -6.290303 -4.121575 0.317836  
 -----  
 HF=-3453.6672327\ZeroPoint=0.4603905\Thermal=0.5035007

G = -2.1 kcal mol<sup>-1</sup>

| Center Number | Atomic Number | Atomic Type | Coordinates (Angstroms) |           |           |
|---------------|---------------|-------------|-------------------------|-----------|-----------|
|               |               |             | X                       | Y         | Z         |
| 1             | 46            | 0           | 2.179410                | 0.660638  | -0.218363 |
| 2             | 46            | 0           | -0.846419               | -1.331800 | -0.474219 |
| 3             | 7             | 0           | 2.353681                | -0.765695 | 1.262349  |
| 4             | 7             | 0           | 3.442649                | -1.293533 | 1.561143  |
| 5             | 6             | 0           | 4.582179                | -1.017494 | 0.767633  |
| 6             | 6             | 0           | 4.632192                | -1.359330 | -0.588034 |
| 7             | 6             | 0           | 5.805469                | -1.131594 | -1.302118 |
| 8             | 1             | 0           | 5.854844                | -1.411539 | -2.348321 |
| 9             | 6             | 0           | 6.910048                | -0.554577 | -0.677661 |
| 10            | 6             | 0           | 6.852995                | -0.231615 | 0.679073  |
| 11            | 1             | 0           | 7.709174                | 0.217892  | 1.167978  |
| 12            | 6             | 0           | 5.701454                | -0.487926 | 1.413275  |
| 13            | 1             | 0           | 5.640210                | -0.239879 | 2.465103  |
| 14            | 6             | 0           | 1.233290                | -1.107903 | 2.112896  |
| 15            | 6             | 0           | -0.094559               | -0.816603 | 1.720207  |
| 16            | 6             | 0           | -1.075886               | -1.089540 | 2.697798  |
| 17            | 1             | 0           | -2.093448               | -0.774404 | 2.508296  |
| 18            | 6             | 0           | -0.796039               | -1.666888 | 3.928539  |
| 19            | 1             | 0           | -1.595904               | -1.846891 | 4.638562  |
| 20            | 6             | 0           | 0.523277                | -1.981646 | 4.255655  |
| 21            | 1             | 0           | 0.766516                | -2.421955 | 5.215718  |
| 22            | 6             | 0           | 1.533524                | -1.685300 | 3.357988  |
| 23            | 1             | 0           | 2.566191                | -1.877042 | 3.612696  |
| 24            | 16            | 0           | -1.639609               | -2.248723 | -2.460775 |
| 25            | 6             | 0           | -3.205663               | -2.959165 | -1.806945 |
| 26            | 1             | 0           | -3.016641               | -3.933216 | -1.346405 |
| 27            | 1             | 0           | -3.893230               | -3.096742 | -2.642954 |
| 28            | 6             | 0           | -3.795836               | -2.002871 | -0.771699 |
| 29            | 1             | 0           | -4.038623               | -1.057342 | -1.259307 |
| 30            | 6             | 0           | -5.059311               | -2.585779 | -0.153896 |
| 31            | 8             | 0           | -5.122222               | -3.093403 | 0.938279  |
| 32            | 8             | 0           | -6.105544               | -2.504240 | -1.001238 |
| 33            | 7             | 0           | -2.791808               | -1.730558 | 0.278119  |
| 34            | 1             | 0           | -3.028693               | -0.851110 | 0.757669  |
| 35            | 1             | 0           | -2.794943               | -2.487044 | 0.960488  |
| 36            | 16            | 0           | 1.148901                | -0.879827 | -1.592316 |
| 37            | 6             | 0           | 0.793041                | 0.236132  | -3.038075 |
| 38            | 1             | 0           | 1.537967                | -0.037358 | -3.788162 |
| 39            | 1             | 0           | -0.196792               | -0.003946 | -3.423359 |
| 40            | 6             | 0           | 0.901755                | 1.725934  | -2.725599 |
| 41            | 1             | 0           | 1.081827                | 2.253156  | -3.673385 |
| 42            | 7             | 0           | 2.025854                | 2.021942  | -1.788805 |
| 43            | 1             | 0           | 1.885033                | 2.950842  | -1.383647 |
| 44            | 6             | 0           | -0.340202               | 2.425835  | -2.151350 |
| 45            | 8             | 0           | -0.214476               | 3.516257  | -1.628800 |
| 46            | 8             | 0           | -1.469651               | 1.789972  | -2.345608 |
| 47            | 1             | 0           | 7.816928                | -0.368824 | -1.241413 |
| 48            | 1             | 0           | -2.233067               | 2.299419  | -1.869920 |
| 49            | 1             | 0           | 2.922677                | 2.027299  | -2.268517 |

|    |    |   |           |           |           |
|----|----|---|-----------|-----------|-----------|
| 50 | 1  | 0 | 3.778031  | -1.823840 | -1.061535 |
| 51 | 17 | 0 | 3.288157  | 2.283758  | 1.077594  |
| 52 | 1  | 0 | -0.507497 | 0.350449  | 1.077954  |
| 53 | 7  | 0 | -3.262704 | 3.074650  | -0.861323 |
| 54 | 6  | 0 | -2.543627 | 3.182449  | 0.427798  |
| 55 | 1  | 0 | -4.153681 | 2.606458  | -0.702389 |
| 56 | 1  | 0 | -3.476301 | 4.005097  | -1.213125 |
| 57 | 6  | 0 | -3.314300 | 3.911563  | 1.544195  |
| 58 | 1  | 0 | -1.625100 | 3.736397  | 0.237423  |
| 59 | 6  | 0 | -2.139742 | 1.755334  | 0.830033  |
| 60 | 16 | 0 | -5.052884 | 3.374931  | 1.838494  |
| 61 | 1  | 0 | -3.399102 | 4.969677  | 1.284155  |
| 62 | 1  | 0 | -2.748995 | 3.849385  | 2.476257  |
| 63 | 8  | 0 | -3.039494 | 0.926068  | 1.057816  |
| 64 | 8  | 0 | -0.879109 | 1.542958  | 0.860499  |
| 65 | 1  | 0 | -4.761455 | 2.074044  | 2.042440  |
| 66 | 1  | 0 | -6.868812 | -2.924099 | -0.575304 |

-----  
 HF=-3453.6513078\ZeroPoint=0.4571872\Thermal=0.4991368

G = -38.6 kcal mol<sup>-1</sup>

| Center Number | Atomic Number | Atomic Type | Coordinates (Angstroms) |           |           |
|---------------|---------------|-------------|-------------------------|-----------|-----------|
|               |               |             | X                       | Y         | Z         |
| 1             | 46            | 0           | -2.107176               | -1.139907 | 0.155207  |
| 2             | 46            | 0           | 0.817043                | 0.759562  | -1.140250 |
| 3             | 7             | 0           | -1.985360               | 0.628027  | 1.241274  |
| 4             | 7             | 0           | -2.901395               | 1.434625  | 1.488959  |
| 5             | 6             | 0           | -4.127872               | 1.286824  | 0.802114  |
| 6             | 6             | 0           | -4.191224               | 1.277217  | -0.595494 |
| 7             | 6             | 0           | -5.434711               | 1.187351  | -1.214199 |
| 8             | 1             | 0           | -5.492162               | 1.199856  | -2.296486 |
| 9             | 6             | 0           | -6.596622               | 1.089287  | -0.449952 |
| 10            | 6             | 0           | -6.521625               | 1.115321  | 0.944317  |
| 11            | 1             | 0           | -7.424390               | 1.043729  | 1.539346  |
| 12            | 6             | 0           | -5.290887               | 1.244072  | 1.576041  |
| 13            | 1             | 0           | -5.211421               | 1.271654  | 2.655467  |
| 14            | 6             | 0           | -0.731198               | 0.907287  | 1.887594  |
| 15            | 6             | 0           | 0.100866                | -0.159366 | 2.228003  |
| 16            | 6             | 0           | 1.324623                | 0.105057  | 2.834006  |
| 17            | 1             | 0           | 1.971345                | -0.719881 | 3.106673  |
| 18            | 6             | 0           | 1.723886                | 1.418237  | 3.075482  |
| 19            | 1             | 0           | 2.690622                | 1.621587  | 3.520920  |
| 20            | 6             | 0           | 0.886356                | 2.480253  | 2.720569  |
| 21            | 1             | 0           | 1.211135                | 3.500691  | 2.883979  |
| 22            | 6             | 0           | -0.345337               | 2.229544  | 2.129224  |
| 23            | 1             | 0           | -0.997715               | 3.035905  | 1.822070  |
| 24            | 16            | 0           | -0.144483               | 2.737868  | -1.863025 |
| 25            | 6             | 0           | 0.999376                | 3.897852  | -0.999479 |
| 26            | 1             | 0           | 0.671679                | 4.053137  | 0.032247  |
| 27            | 1             | 0           | 0.973412                | 4.855863  | -1.520957 |
| 28            | 6             | 0           | 2.422576                | 3.324582  | -0.993475 |
| 29            | 1             | 0           | 2.788093                | 3.256450  | -2.018617 |
| 30            | 6             | 0           | 3.334533                | 4.232541  | -0.179630 |
| 31            | 8             | 0           | 3.596508                | 4.076060  | 0.987682  |
| 32            | 8             | 0           | 3.775997                | 5.277439  | -0.909773 |
| 33            | 7             | 0           | 2.384767                | 1.971200  | -0.410163 |



|    |    |   |           |           |           |    |    |   |           |           |           |
|----|----|---|-----------|-----------|-----------|----|----|---|-----------|-----------|-----------|
| 34 | 1  | 0 | 3.241491  | 1.418833  | -0.538952 | 18 | 6  | 0 | 0.111587  | 2.596071  | -3.567387 |
| 35 | 1  | 0 | 2.250991  | 2.042203  | 0.599066  | 19 | 1  | 0 | 0.742948  | 3.161896  | -4.244225 |
| 36 | 16 | 0 | -1.165999 | -0.302558 | -1.817224 | 20 | 6  | 0 | -1.212837 | 2.973321  | -3.362242 |
| 37 | 6  | 0 | -0.882411 | -1.908131 | -2.706507 | 21 | 1  | 0 | -1.631130 | 3.845089  | -3.850593 |
| 38 | 1  | 0 | -1.643577 | -1.932461 | -3.489056 | 22 | 6  | 0 | -1.991093 | 2.200273  | -2.520166 |
| 39 | 1  | 0 | 0.099097  | -1.885667 | -3.174361 | 23 | 1  | 0 | -3.029999 | 2.446058  | -2.341296 |
| 40 | 6  | 0 | -1.007551 | -3.142830 | -1.812993 | 24 | 16 | 0 | 3.036118  | 0.058914  | -1.589976 |
| 41 | 1  | 0 | -1.228677 | -4.006741 | -2.454480 | 25 | 6  | 0 | 4.106129  | -1.190301 | -0.761429 |
| 42 | 7  | 0 | -2.094131 | -2.983324 | -0.808603 | 26 | 1  | 0 | 4.125550  | -1.025384 | 0.318810  |
| 43 | 1  | 0 | -1.958890 | -3.652666 | -0.047695 | 27 | 1  | 0 | 5.115340  | -1.092605 | -1.159613 |
| 44 | 6  | 0 | 0.283615  | -3.515884 | -1.075483 | 28 | 6  | 0 | 3.543709  | -2.577904 | -1.052998 |
| 45 | 8  | 0 | 0.286653  | -3.789734 | 0.108094  | 29 | 1  | 0 | 3.517568  | -2.720714 | -2.138101 |
| 46 | 8  | 0 | 1.307760  | -3.565969 | -1.892585 | 30 | 6  | 0 | 4.366874  | -3.723081 | -0.470834 |
| 47 | 1  | 0 | -7.561081 | 1.008640  | -0.938071 | 31 | 8  | 0 | 5.670673  | -3.619805 | -0.802370 |
| 48 | 1  | 0 | 2.190418  | -3.618190 | -1.347394 | 32 | 8  | 0 | 3.914505  | -4.632516 | 0.178127  |
| 49 | 1  | 0 | -3.011009 | -3.147502 | -1.216837 | 33 | 7  | 0 | 2.162413  | -2.629076 | -0.532507 |
| 50 | 1  | 0 | -3.288449 | 1.387408  | -1.180475 | 34 | 1  | 0 | 1.735201  | -3.520690 | -0.769180 |
| 51 | 17 | 0 | -3.164373 | -2.156644 | 1.999098  | 35 | 1  | 0 | 2.214300  | -2.573380 | 0.493707  |
| 52 | 1  | 0 | -0.208109 | -1.175823 | 2.020918  | 36 | 16 | 0 | -0.973251 | -2.089300 | -0.085553 |
| 53 | 7  | 0 | 3.469732  | -3.549531 | -0.407285 | 37 | 6  | 0 | -0.378302 | -2.835357 | 1.519478  |
| 54 | 6  | 0 | 3.247345  | -2.516308 | 0.630612  | 38 | 1  | 0 | -1.199949 | -3.476177 | 1.846872  |
| 55 | 1  | 0 | 4.360793  | -3.371077 | -0.869518 | 39 | 1  | 0 | 0.485665  | -3.473399 | 1.341994  |
| 56 | 1  | 0 | 3.560441  | -4.459467 | 0.040503  | 40 | 6  | 0 | -0.055086 | -1.810419 | 2.602781  |
| 57 | 6  | 0 | 4.377188  | -2.421926 | 1.668507  | 41 | 1  | 0 | 0.049076  | -2.346854 | 3.555670  |
| 58 | 1  | 0 | 2.328446  | -2.802862 | 1.147277  | 42 | 7  | 0 | -1.160672 | -0.817624 | 2.712496  |
| 59 | 6  | 0 | 2.944575  | -1.165620 | -0.068781 | 43 | 1  | 0 | -0.825879 | -0.008710 | 3.238397  |
| 60 | 16 | 0 | 6.089243  | -2.297603 | 0.998507  | 44 | 6  | 0 | 1.297365  | -1.063589 | 2.428142  |
| 61 | 1  | 0 | 4.382955  | -3.329558 | 2.277795  | 45 | 8  | 0 | 2.283355  | -1.729143 | 2.108173  |
| 62 | 1  | 0 | 4.196158  | -1.575928 | 2.333345  | 46 | 8  | 0 | 1.251090  | 0.182112  | 2.697789  |
| 63 | 8  | 0 | 3.859452  | -0.338476 | -0.222037 | 47 | 1  | 0 | -7.347529 | -2.416876 | 0.920162  |
| 64 | 8  | 0 | 1.725159  | -1.042337 | -0.420432 | 48 | 1  | 0 | 2.303019  | 1.434584  | 2.946657  |
| 65 | 1  | 0 | 5.862247  | -1.143093 | 0.337985  | 49 | 1  | 0 | -1.966849 | -1.206933 | 3.196344  |
| 66 | 1  | 0 | 4.305902  | 5.845459  | -0.329272 | 50 | 1  | 0 | 6.134451  | -4.382114 | -0.423203 |

HF=-3453.7096639\ZeroPoint=0.467027\Thermal=0.5032782

G = -25.2 kcal mol<sup>-1</sup>

| Center Number | Atomic Number | Atomic Type | Coordinates (Angstroms) |           |           |
|---------------|---------------|-------------|-------------------------|-----------|-----------|
|               |               |             | X                       | Y         | Z         |
| 1             | 46            | 0           | -1.785898               | -0.131402 | 0.846497  |
| 2             | 46            | 0           | 0.941600                | -0.925878 | -1.116384 |
| 3             | 7             | 0           | -2.360890               | 0.354642  | -1.044324 |
| 4             | 7             | 0           | -3.441461               | 0.072312  | -1.601503 |
| 5             | 6             | 0           | -4.461007               | -0.565429 | -0.861175 |
| 6             | 6             | 0           | -5.108334               | -1.626268 | -1.505618 |
| 7             | 6             | 0           | -6.125507               | -2.308444 | -0.849279 |
| 8             | 1             | 0           | -6.607767               | -3.149664 | -1.333043 |
| 9             | 6             | 0           | -6.538619               | -1.897073 | 0.419713  |
| 10            | 6             | 0           | -5.930408               | -0.801070 | 1.031176  |
| 11            | 1             | 0           | -6.275273               | -0.456436 | 1.999254  |
| 12            | 6             | 0           | -4.884167               | -0.131653 | 0.402433  |
| 13            | 1             | 0           | -4.435684               | 0.740995  | 0.858277  |
| 14            | 6             | 0           | -1.433573               | 1.096904  | -1.855045 |
| 15            | 6             | 0           | -0.075549               | 0.709879  | -1.969905 |
| 16            | 6             | 0           | 0.644159                | 1.495655  | -2.899796 |
| 17            | 1             | 0           | 1.671855                | 1.242930  | -3.124277 |

|    |    |   |           |           |           |
|----|----|---|-----------|-----------|-----------|
| 51 | 1  | 0 | -4.786745 | -1.913995 | -2.499119 |
| 52 | 17 | 0 | -2.251650 | 2.017961  | 1.761934  |
| 53 | 1  | 0 | 0.685743  | 1.561719  | -0.088287 |
| 54 | 6  | 0 | 2.282204  | 2.622279  | 0.729425  |
| 55 | 7  | 0 | 0.900320  | 2.051235  | 0.795055  |
| 56 | 6  | 0 | 2.371914  | 3.656995  | -0.388479 |
| 57 | 1  | 0 | 2.925301  | 1.776936  | 0.458089  |
| 58 | 6  | 0 | 2.753693  | 3.161764  | 2.098018  |
| 59 | 1  | 0 | 0.823201  | 1.327865  | 1.543686  |
| 60 | 1  | 0 | 0.178630  | 2.768066  | 0.939242  |
| 61 | 16 | 0 | 1.107995  | 4.990789  | -0.304147 |
| 62 | 1  | 0 | 2.214055  | 3.159080  | -1.345556 |
| 63 | 1  | 0 | 3.366627  | 4.096906  | -0.385443 |
| 64 | 8  | 0 | 2.686943  | 2.335351  | 3.133517  |
| 65 | 8  | 0 | 3.215895  | 4.272158  | 2.195274  |
| 66 | 1  | 0 | 1.623662  | 5.583889  | 0.792017  |

HF=-3453.6933052\ZeroPoint=0.4622593\Thermal=0.5043439

G = -3.0 kcal mol<sup>-1</sup>

| Center Number | Atomic Number | Atomic Type | Coordinates (Angstroms) |           |          |
|---------------|---------------|-------------|-------------------------|-----------|----------|
|               |               |             | X                       | Y         | Z        |
| 1             | 46            | 0           | -1.809926               | -0.077327 | 0.842992 |

|    |    |   |           |           |           |
|----|----|---|-----------|-----------|-----------|
| 2  | 46 | 0 | 1.069628  | -0.804633 | -1.001631 |
| 3  | 7  | 0 | -2.340391 | 0.457695  | -1.070791 |
| 4  | 7  | 0 | -3.369041 | 0.054967  | -1.660651 |
| 5  | 6  | 0 | -4.378964 | -0.612474 | -0.941588 |
| 6  | 6  | 0 | -4.938409 | -1.726541 | -1.580816 |
| 7  | 6  | 0 | -5.942934 | -2.447782 | -0.947723 |
| 8  | 1  | 0 | -6.355675 | -3.328574 | -1.425211 |
| 9  | 6  | 0 | -6.433613 | -2.024125 | 0.289122  |
| 10 | 6  | 0 | -5.915842 | -0.877071 | 0.891775  |
| 11 | 1  | 0 | -6.322079 | -0.525161 | 1.832936  |
| 12 | 6  | 0 | -4.881839 | -0.167363 | 0.289694  |
| 13 | 1  | 0 | -4.500554 | 0.738571  | 0.741656  |
| 14 | 6  | 0 | -1.430096 | 1.194815  | -1.905154 |
| 15 | 6  | 0 | -0.024157 | 1.131514  | -1.706346 |
| 16 | 6  | 0 | 0.738807  | 1.841717  | -2.657201 |
| 17 | 1  | 0 | 1.815072  | 1.837427  | -2.568560 |
| 18 | 6  | 0 | 0.182298  | 2.578917  | -3.693953 |
| 19 | 1  | 0 | 0.827631  | 3.111572  | -4.382578 |
| 20 | 6  | 0 | -1.202042 | 2.657832  | -3.816578 |
| 21 | 1  | 0 | -1.656274 | 3.260719  | -4.594073 |
| 22 | 6  | 0 | -2.004183 | 1.964281  | -2.923016 |
| 23 | 1  | 0 | -3.081764 | 2.016568  | -2.996911 |
| 24 | 16 | 0 | 3.162479  | 0.061374  | -1.620118 |
| 25 | 6  | 0 | 4.194224  | -1.220481 | -0.796589 |
| 26 | 1  | 0 | 4.235403  | -1.049253 | 0.281873  |
| 27 | 1  | 0 | 5.201105  | -1.170019 | -1.209199 |
| 28 | 6  | 0 | 3.557866  | -2.573544 | -1.081370 |
| 29 | 1  | 0 | 3.521078  | -2.719850 | -2.165690 |
| 30 | 6  | 0 | 4.288672  | -3.777344 | -0.494020 |
| 31 | 8  | 0 | 5.612958  | -3.724096 | -0.734587 |
| 32 | 8  | 0 | 3.746598  | -4.687714 | 0.080218  |
| 33 | 7  | 0 | 2.170693  | -2.541450 | -0.560801 |
| 34 | 1  | 0 | 1.681329  | -3.394568 | -0.818659 |
| 35 | 1  | 0 | 2.208548  | -2.496204 | 0.475856  |
| 36 | 16 | 0 | -0.909528 | -1.976826 | -0.143953 |
| 37 | 6  | 0 | -0.446292 | -2.833292 | 1.442753  |
| 38 | 1  | 0 | -1.309274 | -3.458016 | 1.683354  |
| 39 | 1  | 0 | 0.407607  | -3.489696 | 1.280448  |
| 40 | 6  | 0 | -0.147352 | -1.867357 | 2.579621  |
| 41 | 1  | 0 | -0.097670 | -2.439157 | 3.515704  |
| 42 | 7  | 0 | -1.224634 | -0.839784 | 2.687683  |
| 43 | 1  | 0 | -0.853511 | -0.054521 | 3.228547  |
| 44 | 6  | 0 | 1.230639  | -1.144510 | 2.474204  |
| 45 | 8  | 0 | 2.197534  | -1.817777 | 2.083775  |
| 46 | 8  | 0 | 1.207864  | 0.059017  | 2.845398  |
| 47 | 1  | 0 | -7.233377 | -2.574797 | 0.770923  |
| 48 | 1  | 0 | 2.093000  | 1.425874  | 3.132483  |
| 49 | 1  | 0 | -2.049041 | -1.200412 | 3.162565  |
| 50 | 1  | 0 | 6.016637  | -4.523259 | -0.362000 |
| 51 | 1  | 0 | -4.557170 | -2.023241 | -2.550248 |
| 52 | 17 | 0 | -2.447608 | 1.957056  | 1.859342  |
| 53 | 1  | 0 | 0.450865  | 1.305029  | -0.506483 |
| 54 | 6  | 0 | 2.179639  | 2.549807  | 0.922690  |
| 55 | 7  | 0 | 0.798528  | 2.045696  | 0.780323  |
| 56 | 6  | 0 | 2.547909  | 3.535506  | -0.187557 |
| 57 | 1  | 0 | 2.835730  | 1.678716  | 0.817593  |
| 58 | 6  | 0 | 2.444965  | 3.171311  | 2.318755  |
| 59 | 1  | 0 | 0.596604  | 1.374043  | 1.520952  |

|    |    |   |          |          |           |
|----|----|---|----------|----------|-----------|
| 60 | 1  | 0 | 0.119604 | 2.803650 | 0.848767  |
| 61 | 16 | 0 | 1.314696 | 4.862773 | -0.511595 |
| 62 | 1  | 0 | 2.655555 | 2.997243 | -1.124661 |
| 63 | 1  | 0 | 3.504568 | 3.998703 | 0.045416  |
| 64 | 8  | 0 | 2.366212 | 2.351800 | 3.362026  |
| 65 | 8  | 0 | 2.734057 | 4.337392 | 2.455172  |
| 66 | 1  | 0 | 1.543096 | 5.529978 | 0.637822  |

HF=-3453.6550454\ZeroPoint=0.4581764\Thermal=0.499756

G = -11.8 kcal mol<sup>-1</sup>

| Center Number | Atomic Number | Atomic Type | Coordinates (Angstroms) |           |           |
|---------------|---------------|-------------|-------------------------|-----------|-----------|
|               |               |             | X                       | Y         | Z         |
| 1             | 46            | 0           | -2.109117               | -0.716923 | -0.756853 |
| 2             | 46            | 0           | 0.612325                | 1.180771  | 0.684069  |
| 3             | 7             | 0           | -2.659923               | -0.358764 | 1.233693  |
| 4             | 7             | 0           | -3.729859               | 0.119560  | 1.670584  |
| 5             | 6             | 0           | -4.858317               | 0.240276  | 0.848360  |
| 6             | 6             | 0           | -5.655731               | 1.366070  | 1.108168  |
| 7             | 6             | 0           | -6.794661               | 1.593808  | 0.347413  |
| 8             | 1             | 0           | -7.395014               | 2.477828  | 0.526195  |
| 9             | 6             | 0           | -7.175423               | 0.670571  | -0.628542 |
| 10            | 6             | 0           | -6.414129               | -0.480475 | -0.840670 |
| 11            | 1             | 0           | -6.732860               | -1.217012 | -1.568918 |
| 12            | 6             | 0           | -5.250021               | -0.703075 | -0.115020 |
| 13            | 1             | 0           | -4.683999               | -1.614206 | -0.253523 |
| 14            | 6             | 0           | -1.589001               | -0.430213 | 2.193253  |
| 15            | 6             | 0           | -0.339905               | -0.920130 | 1.749865  |
| 16            | 6             | 0           | 0.703485                | -1.074635 | 2.671406  |
| 17            | 1             | 0           | 1.621334                | -1.516238 | 2.310996  |
| 18            | 6             | 0           | 0.527559                | -0.696338 | 4.001753  |
| 19            | 1             | 0           | 1.342834                | -0.805433 | 4.706060  |
| 20            | 6             | 0           | -0.702053               | -0.188934 | 4.417444  |
| 21            | 1             | 0           | -0.843221               | 0.103842  | 5.451551  |
| 22            | 6             | 0           | -1.764789               | -0.057389 | 3.526125  |
| 23            | 1             | 0           | -2.722448               | 0.320687  | 3.854189  |
| 24            | 16            | 0           | 2.482025                | 1.362777  | 2.079015  |
| 25            | 6             | 0           | 3.584355                | 2.153502  | 0.838535  |
| 26            | 1             | 0           | 3.954063                | 1.408983  | 0.128191  |
| 27            | 1             | 0           | 4.436894                | 2.587498  | 1.360277  |
| 28            | 6             | 0           | 2.789367                | 3.226762  | 0.110801  |
| 29            | 1             | 0           | 2.457956                | 3.965356  | 0.847803  |
| 30            | 6             | 0           | 3.545664                | 3.989544  | -0.973491 |
| 31            | 8             | 0           | 4.769739                | 4.363627  | -0.556558 |
| 32            | 8             | 0           | 3.089931                | 4.258486  | -2.055631 |
| 33            | 7             | 0           | 1.585128                | 2.600918  | -0.485383 |
| 34            | 1             | 0           | 0.949341                | 3.322788  | -0.813982 |
| 35            | 1             | 0           | 1.824472                | 2.006761  | -1.305393 |
| 36            | 16            | 0           | -1.350563               | 1.480734  | -0.743108 |
| 37            | 6             | 0           | -0.857418               | 1.555019  | -2.530688 |
| 38            | 1             | 0           | -1.741565               | 1.927477  | -3.052608 |
| 39            | 1             | 0           | -0.053036               | 2.276855  | -2.666695 |
| 40            | 6             | 0           | -0.430105               | 0.205665  | -3.075800 |
| 41            | 1             | 0           | -0.373526               | 0.271962  | -4.170481 |
| 42            | 7             | 0           | -1.416293               | -0.856695 | -2.707898 |
| 43            | 1             | 0           | -0.927504               | -1.754669 | -2.790213 |

|    |    |   |           |           |           |    |    |   |           |           |           |
|----|----|---|-----------|-----------|-----------|----|----|---|-----------|-----------|-----------|
| 44 | 6  | 0 | 0.987981  | -0.270434 | -2.635785 | 28 | 6  | 0 | 3.394470  | -1.921927 | -0.561982 |
| 45 | 8  | 0 | 1.839357  | 0.594007  | -2.354917 | 29 | 1  | 0 | 3.010053  | -1.636263 | 0.424892  |
| 46 | 8  | 0 | 1.127130  | -1.519546 | -2.666788 | 30 | 6  | 0 | 4.850940  | -1.489151 | -0.569109 |
| 47 | 1  | 0 | -8.077342 | 0.836366  | -1.206519 | 31 | 8  | 0 | 5.652910  | -2.349017 | 0.074102  |
| 48 | 1  | 0 | 2.608973  | -2.302328 | -2.645815 | 32 | 8  | 0 | 5.234203  | -0.444087 | -1.048130 |
| 49 | 1  | 0 | -2.216411 | -0.871476 | -3.336103 | 33 | 7  | 0 | 2.640098  | -1.161265 | -1.593414 |
| 50 | 1  | 0 | 5.192664  | 4.861321  | -1.273676 | 34 | 1  | 0 | 2.996453  | -0.209414 | -1.635521 |
| 51 | 1  | 0 | -5.352299 | 2.054753  | 1.887243  | 35 | 1  | 0 | 2.816959  | -1.571611 | -2.509750 |
| 52 | 17 | 0 | -2.623938 | -3.012291 | -0.789723 | 36 | 16 | 0 | -1.435735 | -1.972173 | -0.007235 |
| 53 | 1  | 0 | -0.229045 | -1.375879 | 0.771202  | 37 | 6  | 0 | -0.896021 | -2.797303 | 1.579651  |
| 54 | 6  | 0 | 3.373986  | -1.879646 | -0.374809 | 38 | 1  | 0 | -1.781782 | -3.333433 | 1.928593  |
| 55 | 7  | 0 | 2.068855  | -2.427805 | 0.024853  | 39 | 1  | 0 | -0.109105 | -3.507405 | 1.327617  |
| 56 | 6  | 0 | 4.277371  | -1.657085 | 0.839734  | 40 | 6  | 0 | -0.411340 | -1.822428 | 2.645023  |
| 57 | 1  | 0 | 3.175361  | -0.897864 | -0.822436 | 41 | 1  | 0 | -0.380017 | -2.357175 | 3.603691  |
| 58 | 6  | 0 | 4.093988  | -2.712655 | -1.462798 | 42 | 7  | 0 | -1.350685 | -0.666820 | 2.756706  |
| 59 | 1  | 0 | 1.455309  | -2.487542 | -0.781630 | 43 | 1  | 0 | -0.902084 | 0.081255  | 3.286641  |
| 60 | 1  | 0 | 2.190966  | -3.363291 | 0.403142  | 44 | 6  | 0 | 1.035773  | -1.302764 | 2.439527  |
| 61 | 16 | 0 | 4.522856  | -3.120850 | 1.933955  | 45 | 8  | 0 | 1.916614  | -2.109318 | 2.181700  |
| 62 | 1  | 0 | 3.827336  | -0.900627 | 1.482104  | 46 | 8  | 0 | 1.172755  | -0.033412 | 2.626303  |
| 63 | 1  | 0 | 5.256652  | -1.305541 | 0.516438  | 47 | 1  | 0 | -7.802672 | -0.904063 | 0.869051  |
| 64 | 8  | 0 | 3.447907  | -2.833305 | -2.622773 | 48 | 1  | 0 | 2.469584  | 0.827199  | 2.852712  |
| 65 | 8  | 0 | 5.172872  | -3.235530 | -1.290802 | 49 | 1  | 0 | -2.209871 | -0.932877 | 3.232992  |
| 66 | 1  | 0 | 5.220320  | -3.844675 | 1.035448  | 50 | 1  | 0 | 6.544214  | -1.967281 | 0.103082  |

HF=-3453.6673497\ZeroPoint=0.4605521\Thermal=0.5034241

G = -12.2 kcal mol<sup>-1</sup>

| Center Number | Atomic Number | Atomic Type | Coordinates (Angstroms) |           |           |
|---------------|---------------|-------------|-------------------------|-----------|-----------|
|               |               |             | X                       | Y         | Z         |
| 1             | 46            | 0           | -1.841675               | 0.119010  | 0.890531  |
| 2             | 46            | 0           | 0.557925                | -1.409663 | -1.135452 |
| 3             | 7             | 0           | -2.301840               | 0.712484  | -1.008380 |
| 4             | 7             | 0           | -3.410368               | 0.682250  | -1.579631 |
| 5             | 6             | 0           | -4.555708               | 0.281654  | -0.857271 |
| 6             | 6             | 0           | -5.422726               | -0.587640 | -1.530213 |
| 7             | 6             | 0           | -6.574135               | -1.035061 | -0.894119 |
| 8             | 1             | 0           | -7.230919               | -1.733065 | -1.399646 |
| 9             | 6             | 0           | -6.892718               | -0.570424 | 0.383632  |
| 10            | 6             | 0           | -6.055460               | 0.342656  | 1.024378  |
| 11            | 1             | 0           | -6.320723               | 0.733209  | 2.000048  |
| 12            | 6             | 0           | -4.878557               | 0.769843  | 0.416120  |
| 13            | 1             | 0           | -4.246917               | 1.506189  | 0.894907  |
| 14            | 6             | 0           | -1.217959               | 1.217816  | -1.811994 |
| 15            | 6             | 0           | 0.003557                | 0.508445  | -1.894111 |
| 16            | 6             | 0           | 0.909743                | 1.089751  | -2.812047 |
| 17            | 1             | 0           | 1.848537                | 0.596461  | -3.030814 |
| 18            | 6             | 0           | 0.674926                | 2.278786  | -3.501838 |
| 19            | 1             | 0           | 1.433054                | 2.667945  | -4.173506 |
| 20            | 6             | 0           | -0.522118               | 2.967243  | -3.323030 |
| 21            | 1             | 0           | -0.707858               | 3.907397  | -3.827815 |
| 22            | 6             | 0           | -1.482150               | 2.415314  | -2.490925 |
| 23            | 1             | 0           | -2.435150               | 2.906259  | -2.338803 |
| 24            | 16            | 0           | 1.295555                | -3.683650 | -0.933245 |
| 25            | 6             | 0           | 3.114246                | -3.412795 | -0.722825 |
| 26            | 1             | 0           | 3.646127                | -3.813617 | -1.591439 |
| 27            | 1             | 0           | 3.460416                | -3.935224 | 0.167310  |

|    |    |   |           |           |           |
|----|----|---|-----------|-----------|-----------|
| 28 | 6  | 0 | 3.394470  | -1.921927 | -0.561982 |
| 29 | 1  | 0 | 3.010053  | -1.636263 | 0.424892  |
| 30 | 6  | 0 | 4.850940  | -1.489151 | -0.569109 |
| 31 | 8  | 0 | 5.652910  | -2.349017 | 0.074102  |
| 32 | 8  | 0 | 5.234203  | -0.444087 | -1.048130 |
| 33 | 7  | 0 | 2.640098  | -1.161265 | -1.593414 |
| 34 | 1  | 0 | 2.996453  | -0.209414 | -1.635521 |
| 35 | 1  | 0 | 2.816959  | -1.571611 | -2.509750 |
| 36 | 16 | 0 | -1.435735 | -1.972173 | -0.007235 |
| 37 | 6  | 0 | -0.896021 | -2.797303 | 1.579651  |
| 38 | 1  | 0 | -1.781782 | -3.333433 | 1.928593  |
| 39 | 1  | 0 | -0.109105 | -3.507405 | 1.327617  |
| 40 | 6  | 0 | -0.411340 | -1.822428 | 2.645023  |
| 41 | 1  | 0 | -0.380017 | -2.357175 | 3.603691  |
| 42 | 7  | 0 | -1.350685 | -0.666820 | 2.756706  |
| 43 | 1  | 0 | -0.902084 | 0.081255  | 3.286641  |
| 44 | 6  | 0 | 1.035773  | -1.302764 | 2.439527  |
| 45 | 8  | 0 | 1.916614  | -2.109318 | 2.181700  |
| 46 | 8  | 0 | 1.172755  | -0.033412 | 2.626303  |
| 47 | 1  | 0 | -7.802672 | -0.904063 | 0.869051  |
| 48 | 1  | 0 | 2.469584  | 0.827199  | 2.852712  |
| 49 | 1  | 0 | -2.209871 | -0.932877 | 3.232992  |
| 50 | 1  | 0 | 6.544214  | -1.967281 | 0.103082  |
| 51 | 1  | 0 | -5.166312 | -0.918343 | -2.529288 |
| 52 | 17 | 0 | -1.858950 | 2.340856  | 1.778176  |
| 53 | 1  | 0 | 0.767657  | 1.470720  | -0.098560 |
| 54 | 6  | 0 | 2.677855  | 1.952867  | 0.609966  |
| 55 | 7  | 0 | 1.193885  | 1.831919  | 0.768794  |
| 56 | 6  | 0 | 3.027820  | 2.914943  | -0.524026 |
| 57 | 1  | 0 | 3.031065  | 0.949229  | 0.353123  |
| 58 | 6  | 0 | 3.384673  | 2.329281  | 1.944382  |
| 59 | 1  | 0 | 0.955893  | 1.132008  | 1.519424  |
| 60 | 1  | 0 | 0.742589  | 2.728273  | 0.980494  |
| 61 | 16 | 0 | 2.253462  | 4.576349  | -0.377370 |
| 62 | 1  | 0 | 2.661121  | 2.515693  | -1.469131 |
| 63 | 1  | 0 | 4.109129  | 3.016438  | -0.581091 |
| 64 | 8  | 0 | 3.139671  | 1.571156  | 2.993863  |
| 65 | 8  | 0 | 4.164520  | 3.250750  | 1.971426  |
| 66 | 1  | 0 | 3.009031  | 4.975362  | 0.665947  |

HF=-3453.6696738\ZeroPoint=0.4613832\Thermal=0.5036628

G = 2.8 kcal mol<sup>-1</sup>

| Center Number | Atomic Number | Atomic Type | Coordinates (Angstroms) |           |           |
|---------------|---------------|-------------|-------------------------|-----------|-----------|
|               |               |             | X                       | Y         | Z         |
| 1             | 46            | 0           | -1.918283               | 0.325585  | 0.797886  |
| 2             | 46            | 0           | 0.711695                | -1.392617 | -0.707025 |
| 3             | 7             | 0           | -2.252129               | 0.540616  | -1.228077 |
| 4             | 7             | 0           | -3.317798               | 0.221793  | -1.802070 |
| 5             | 6             | 0           | -4.462233               | -0.080218 | -1.037178 |
| 6             | 6             | 0           | -5.194493               | -1.198227 | -1.455876 |
| 7             | 6             | 0           | -6.339331               | -1.567148 | -0.760239 |
| 8             | 1             | 0           | -6.890079               | -2.450466 | -1.061197 |
| 9             | 6             | 0           | -6.788492               | -0.789697 | 0.309140  |
| 10            | 6             | 0           | -6.088015               | 0.357759  | 0.682612  |
| 11            | 1             | 0           | -6.454959               | 0.982362  | 1.488778  |

|    |    |   |           |           |           |
|----|----|---|-----------|-----------|-----------|
| 12 | 6  | 0 | -4.917955 | 0.718110  | 0.021715  |
| 13 | 1  | 0 | -4.388530 | 1.621989  | 0.292222  |
| 14 | 6  | 0 | -1.177078 | 0.896473  | -2.114420 |
| 15 | 6  | 0 | 0.168687  | 0.641737  | -1.750813 |
| 16 | 6  | 0 | 1.110406  | 0.946589  | -2.757723 |
| 17 | 1  | 0 | 2.162391  | 0.792916  | -2.563097 |
| 18 | 6  | 0 | 0.776165  | 1.478996  | -3.995393 |
| 19 | 1  | 0 | 1.553867  | 1.703573  | -4.716405 |
| 20 | 6  | 0 | -0.558550 | 1.759058  | -4.285824 |
| 21 | 1  | 0 | -0.836400 | 2.209288  | -5.231386 |
| 22 | 6  | 0 | -1.532162 | 1.465549  | -3.345385 |
| 23 | 1  | 0 | -2.573998 | 1.673409  | -3.548296 |
| 24 | 16 | 0 | 1.234116  | -3.658821 | -0.451421 |
| 25 | 6  | 0 | 3.080487  | -3.557530 | -0.451554 |
| 26 | 1  | 0 | 3.466177  | -3.904036 | -1.415989 |
| 27 | 1  | 0 | 3.469050  | -4.209361 | 0.329598  |
| 28 | 6  | 0 | 3.524547  | -2.121902 | -0.189059 |
| 29 | 1  | 0 | 3.227207  | -1.839763 | 0.826254  |
| 30 | 6  | 0 | 5.024235  | -1.904460 | -0.317630 |
| 31 | 8  | 0 | 5.722087  | -2.750940 | 0.458641  |
| 32 | 8  | 0 | 5.530685  | -1.056537 | -1.013445 |
| 33 | 7  | 0 | 2.804447  | -1.221542 | -1.127309 |
| 34 | 1  | 0 | 3.172410  | -0.280191 | -1.022969 |
| 35 | 1  | 0 | 3.007446  | -1.493270 | -2.088464 |
| 36 | 16 | 0 | -1.351891 | -1.874310 | 0.319571  |
| 37 | 6  | 0 | -0.861063 | -2.377257 | 2.047100  |
| 38 | 1  | 0 | -1.715855 | -2.940242 | 2.429564  |
| 39 | 1  | 0 | 0.001992  | -3.035311 | 1.962971  |
| 40 | 6  | 0 | -0.544216 | -1.195200 | 2.946679  |
| 41 | 1  | 0 | -0.535598 | -1.544200 | 3.988484  |
| 42 | 7  | 0 | -1.579958 | -0.128009 | 2.798173  |
| 43 | 1  | 0 | -1.218429 | 0.720165  | 3.242017  |
| 44 | 6  | 0 | 0.849009  | -0.529224 | 2.729465  |
| 45 | 8  | 0 | 1.789866  | -1.210823 | 2.319535  |
| 46 | 8  | 0 | 0.843558  | 0.704942  | 3.039301  |
| 47 | 1  | 0 | -7.694098 | -1.066905 | 0.836415  |
| 48 | 1  | 0 | 1.914377  | 1.825659  | 3.099984  |
| 49 | 1  | 0 | -2.460666 | -0.386355 | 3.237481  |
| 50 | 1  | 0 | 6.663984  | -2.539708 | 0.365508  |
| 51 | 1  | 0 | -4.838437 | -1.775044 | -2.300686 |
| 52 | 17 | 0 | -2.153254 | 2.627941  | 1.296640  |
| 53 | 1  | 0 | 0.650990  | 1.050470  | -0.529825 |
| 54 | 6  | 0 | 2.556677  | 2.036454  | 0.730512  |
| 55 | 7  | 0 | 1.100633  | 1.958648  | 0.459593  |
| 56 | 6  | 0 | 3.357431  | 2.425596  | -0.516630 |
| 57 | 1  | 0 | 2.856735  | 1.033748  | 1.058449  |
| 58 | 6  | 0 | 2.897633  | 3.012044  | 1.898860  |
| 59 | 1  | 0 | 0.600868  | 1.706626  | 1.314793  |
| 60 | 1  | 0 | 0.744189  | 2.862939  | 0.149299  |
| 61 | 16 | 0 | 2.717967  | 3.881396  | -1.445363 |
| 62 | 1  | 0 | 3.363048  | 1.618180  | -1.245530 |
| 63 | 1  | 0 | 4.390415  | 2.616316  | -0.234186 |
| 64 | 8  | 0 | 2.453356  | 2.679153  | 3.093134  |
| 65 | 8  | 0 | 3.558889  | 4.008459  | 1.707487  |
| 66 | 1  | 0 | 3.103199  | 4.783825  | -0.520424 |

HF=-3453.6434115\ZeroPoint=0.4573775\Thermal=0.49937

G = -34.8 kcal mol<sup>-1</sup>

| -----  |        |        |                         |           |           |  |
|--------|--------|--------|-------------------------|-----------|-----------|--|
| Center | Atomic | Atomic | Coordinates (Angstroms) |           |           |  |
| Number | Number | Type   | X                       | Y         | Z         |  |
| -----  |        |        |                         |           |           |  |
| 1      | 46     | 0      | -2.332734               | -0.981368 | 0.657029  |  |
| 2      | 46     | 0      | 0.514540                | 0.223600  | -0.703952 |  |
| 3      | 7      | 0      | -2.777075               | 1.054591  | 0.680858  |  |
| 4      | 7      | 0      | -3.667927               | 1.632433  | 0.025777  |  |
| 5      | 6      | 0      | -4.634703               | 0.860934  | -0.647161 |  |
| 6      | 6      | 0      | -4.974144               | 1.286912  | -1.936444 |  |
| 7      | 6      | 0      | -5.916865               | 0.572738  | -2.666040 |  |
| 8      | 1      | 0      | -6.158494               | 0.878727  | -3.677004 |  |
| 9      | 6      | 0      | -6.562088               | -0.523760 | -2.091089 |  |
| 10     | 6      | 0      | -6.261411               | -0.906865 | -0.783196 |  |
| 11     | 1      | 0      | -6.789290               | -1.734204 | -0.323205 |  |
| 12     | 6      | 0      | -5.291892               | -0.226807 | -0.053866 |  |
| 13     | 1      | 0      | -5.077489               | -0.501442 | 0.970877  |  |
| 14     | 6      | 0      | -1.828964               | 1.916707  | 1.335608  |  |
| 15     | 6      | 0      | -1.034854               | 1.389943  | 2.356931  |  |
| 16     | 6      | 0      | -0.072647               | 2.194847  | 2.961074  |  |
| 17     | 1      | 0      | 0.538931                | 1.787384  | 3.757246  |  |
| 18     | 6      | 0      | 0.104517                | 3.513060  | 2.544764  |  |
| 19     | 1      | 0      | 0.872574                | 4.127141  | 2.999305  |  |
| 20     | 6      | 0      | -0.696798               | 4.031861  | 1.524262  |  |
| 21     | 1      | 0      | -0.556682               | 5.053675  | 1.191188  |  |
| 22     | 6      | 0      | -1.659395               | 3.240698  | 0.912554  |  |
| 23     | 1      | 0      | -2.257142               | 3.619722  | 0.096526  |  |
| 24     | 16     | 0      | 0.261281                | 2.074346  | -2.045699 |  |
| 25     | 6      | 0      | 1.499820                | 3.175446  | -1.230643 |  |
| 26     | 1      | 0      | 1.021601                | 3.730134  | -0.420703 |  |
| 27     | 1      | 0      | 1.864086                | 3.884193  | -1.975845 |  |
| 28     | 6      | 0      | 2.655978                | 2.346541  | -0.663057 |  |
| 29     | 1      | 0      | 3.210001                | 1.893092  | -1.485467 |  |
| 30     | 6      | 0      | 3.593049                | 3.236340  | 0.143870  |  |
| 31     | 8      | 0      | 4.464804                | 3.884660  | -0.651353 |  |
| 32     | 8      | 0      | 3.538099                | 3.379008  | 1.340475  |  |
| 33     | 7      | 0      | 2.110765                | 1.271710  | 0.187950  |  |
| 34     | 1      | 0      | 2.844778                | 0.582974  | 0.466073  |  |
| 35     | 1      | 0      | 1.748747                | 1.683584  | 1.049404  |  |
| 36     | 16     | 0      | -1.429710               | -0.783787 | -1.514101 |  |
| 37     | 6      | 0      | -0.925607               | -2.558345 | -1.703174 |  |
| 38     | 1      | 0      | -1.775688               | -3.069650 | -2.163362 |  |
| 39     | 1      | 0      | -0.086648               | -2.602197 | -2.398625 |  |
| 40     | 6      | 0      | -0.574451               | -3.223445 | -0.377946 |  |
| 41     | 1      | 0      | -0.488116               | -4.303159 | -0.526652 |  |
| 42     | 7      | 0      | -1.688837               | -2.957288 | 0.590760  |  |
| 43     | 1      | 0      | -1.431686               | -3.221838 | 1.541790  |  |
| 44     | 6      | 0      | 0.783011                | -2.782065 | 0.234699  |  |
| 45     | 8      | 0      | 1.009266                | -1.553186 | 0.461129  |  |
| 46     | 8      | 0      | 1.573629                | -3.705911 | 0.488167  |  |
| 47     | 1      | 0      | -7.312961               | -1.065606 | -2.654591 |  |
| 48     | 1      | 0      | 3.260365                | -3.744124 | 0.699405  |  |
| 49     | 1      | 0      | -2.501874               | -3.523377 | 0.351152  |  |
| 50     | 1      | 0      | 5.025469                | 4.444879  | -0.092599 |  |
| 51     | 1      | 0      | -4.470171               | 2.148437  | -2.357016 |  |
| 52     | 17     | 0      | -3.220093               | -1.418759 | 2.804580  |  |
| 53     | 1      | 0      | -1.180691               | 0.370816  | 2.686783  |  |

|                                                        |    |   |          |           |           |    |    |    |           |           |           |           |
|--------------------------------------------------------|----|---|----------|-----------|-----------|----|----|----|-----------|-----------|-----------|-----------|
| 54                                                     | 6  | 0 | 4.200727 | -1.688505 | -0.263514 | 38 | 1  | 0  | -0.676354 | -3.721093 | -0.694009 |           |
| 55                                                     | 7  | 0 | 3.846120 | -0.893434 | 0.922990  | 39 | 1  | 0  | -1.232897 | -2.209663 | 0.001720  |           |
| 56                                                     | 6  | 0 | 4.969323 | -0.850962 | -1.290426 | 40 | 6  | 0  | -1.252799 | -2.290371 | -2.167572 |           |
| 57                                                     | 1  | 0 | 3.254344 | -1.982075 | -0.727556 | 41 | 1  | 0  | -0.637305 | -2.736068 | -2.956110 |           |
| 58                                                     | 6  | 0 | 4.960581 | -2.975204 | 0.123449  | 42 | 7  | 0  | -1.232786 | -0.809136 | -2.380011 |           |
| 59                                                     | 1  | 0 | 3.141356 | -1.379618 | 1.469839  | 43 | 1  | 0  | -1.943526 | -0.338758 | -1.727823 |           |
| 60                                                     | 1  | 0 | 4.667669 | -0.715990 | 1.493523  | 44 | 6  | 0  | -2.686510 | -2.748911 | -2.433097 |           |
| 61                                                     | 16 | 0 | 6.401217 | 0.111558  | -0.644635 | 45 | 8  | 0  | -2.999497 | -3.859211 | -1.759113 |           |
| 62                                                     | 1  | 0 | 4.294924 | -0.102572 | -1.709639 | 46 | 8  | 0  | -3.409478 | -2.187902 | -3.216892 |           |
| 63                                                     | 1  | 0 | 5.313957 | -1.487261 | -2.105266 | 47 | 1  | 0  | 6.545626  | -1.821492 | -0.017287 |           |
| 64                                                     | 8  | 0 | 4.236672 | -3.916576 | 0.728627  | 48 | 1  | 0  | -1.498056 | -0.559225 | -3.332252 |           |
| 65                                                     | 8  | 0 | 6.149081 | -3.112875 | -0.055885 | 49 | 1  | 0  | 3.487481  | 1.033401  | 0.961518  |           |
| 66                                                     | 1  | 0 | 7.149151 | -0.966754 | -0.335560 | 50 | 1  | 0  | -3.917495 | -4.093465 | -1.967804 |           |
| -----                                                  |    |   |          |           |           |    | 51 | 17 | 0         | -3.353560 | 0.303348  | -0.561769 |
| HF=-3453.7034169\ZeroPoint=0.4611425\Thermal=0.5040031 |    |   |          |           |           |    | 52 | 1  | 0         | -0.287746 | -0.472258 | -2.160698 |
| -----                                                  |    |   |          |           |           |    |    |    |           |           |           |           |

G = -1.9 kcal mol<sup>-1</sup>

| Center Number | Atomic Number | Atomic Type | Coordinates (Angstroms) |           |           |
|---------------|---------------|-------------|-------------------------|-----------|-----------|
|               |               |             | X                       | Y         | Z         |
| 1             | 46            | 0           | 1.015343                | -0.209803 | 0.713643  |
| 2             | 46            | 0           | -1.583524               | 1.059736  | 0.876356  |
| 3             | 7             | 0           | 1.367865                | 1.135661  | -0.849327 |
| 4             | 7             | 0           | 2.429518                | 1.112705  | -1.520481 |
| 5             | 6             | 0           | 3.497034                | 0.313945  | -1.071426 |
| 6             | 6             | 0           | 3.958683                | 0.364599  | 0.252630  |
| 7             | 6             | 0           | 5.062196                | -0.399008 | 0.620770  |
| 8             | 1             | 0           | 5.433540                | -0.345926 | 1.637845  |
| 9             | 6             | 0           | 5.693661                | -1.220211 | -0.312575 |
| 10            | 6             | 0           | 5.243279                | -1.249440 | -1.634021 |
| 11            | 1             | 0           | 5.738630                | -1.879930 | -2.362909 |
| 12            | 6             | 0           | 4.165865                | -0.463298 | -2.022948 |
| 13            | 1             | 0           | 3.808410                | -0.466778 | -3.045139 |
| 14            | 6             | 0           | 0.385390                | 2.103212  | -1.264829 |
| 15            | 6             | 0           | -0.867479               | 2.182884  | -0.614796 |
| 16            | 6             | 0           | -1.755340               | 3.176904  | -1.075202 |
| 17            | 1             | 0           | -2.734018               | 3.252381  | -0.618943 |
| 18            | 6             | 0           | -1.426548               | 4.042819  | -2.105805 |
| 19            | 1             | 0           | -2.139968               | 4.795371  | -2.424135 |
| 20            | 6             | 0           | -0.178861               | 3.943942  | -2.737670 |
| 21            | 1             | 0           | 0.085726                | 4.618612  | -3.543530 |
| 22            | 6             | 0           | 0.719063                | 2.985387  | -2.319243 |
| 23            | 1             | 0           | 1.691588                | 2.901534  | -2.783499 |
| 24            | 16            | 0           | 0.345198                | 1.555835  | 2.166949  |
| 25            | 6             | 0           | 0.048567                | 0.510648  | 3.664293  |
| 26            | 1             | 0           | -0.790814               | 0.943591  | 4.207970  |
| 27            | 1             | 0           | 0.949550                | 0.583099  | 4.279960  |
| 28            | 6             | 0           | -0.269884               | -0.932334 | 3.314221  |
| 29            | 1             | 0           | -0.266300               | -1.540130 | 4.227214  |
| 30            | 6             | 0           | -1.658968               | -1.171614 | 2.631728  |
| 31            | 8             | 0           | -1.870770               | -2.340814 | 2.304343  |
| 32            | 8             | 0           | -2.406475               | -0.151950 | 2.472256  |
| 33            | 7             | 0           | 0.740927                | -1.479793 | 2.357069  |
| 34            | 1             | 0           | 1.648191                | -1.618018 | 2.798095  |
| 35            | 1             | 0           | 0.406124                | -2.393708 | 2.046244  |
| 36            | 16            | 0           | 1.130987                | -2.096181 | -0.745653 |
| 37            | 6             | 0           | -0.642586               | -2.638620 | -0.809887 |

HF=-2731.5491882\ZeroPoint=0.3628617\Thermal=0.3955335

G = 25.6 kcal mol<sup>-1</sup>

| Center Number | Atomic Number | Atomic Type | Coordinates (Angstroms) |           |           |
|---------------|---------------|-------------|-------------------------|-----------|-----------|
|               |               |             | X                       | Y         | Z         |
| 1             | 46            | 0           | -0.968410               | -0.876388 | -0.228624 |
| 2             | 46            | 0           | 1.828865                | -0.160510 | -0.939230 |
| 3             | 7             | 0           | -1.527366               | 1.062876  | -0.710164 |
| 4             | 7             | 0           | -2.643688               | 1.609368  | -0.516610 |
| 5             | 6             | 0           | -3.702771               | 0.858956  | 0.007862  |
| 6             | 6             | 0           | -3.975034               | -0.470217 | -0.354091 |
| 7             | 6             | 0           | -5.069502               | -1.119499 | 0.206019  |
| 8             | 1             | 0           | -5.291186               | -2.140734 | -0.081092 |
| 9             | 6             | 0           | -5.884229               | -0.460154 | 1.125578  |
| 10            | 6             | 0           | -5.631311               | 0.873412  | 1.458379  |
| 11            | 1             | 0           | -6.274424               | 1.389609  | 2.161017  |
| 12            | 6             | 0           | -4.563168               | 1.542831  | 0.879726  |
| 13            | 1             | 0           | -4.355013               | 2.579867  | 1.112950  |
| 14            | 6             | 0           | -0.568055               | 1.902304  | -1.383197 |
| 15            | 6             | 0           | 0.808391                | 1.746195  | -1.073576 |
| 16            | 6             | 0           | 1.693362                | 2.675827  | -1.656699 |
| 17            | 1             | 0           | 2.739567                | 2.628631  | -1.381626 |
| 18            | 6             | 0           | 1.252744                | 3.635037  | -2.566031 |
| 19            | 1             | 0           | 1.964717                | 4.311416  | -3.025224 |
| 20            | 6             | 0           | -0.100939               | 3.720020  | -2.888693 |
| 21            | 1             | 0           | -0.447288               | 4.454655  | -3.606621 |
| 22            | 6             | 0           | -1.019691               | 2.869515  | -2.279761 |
| 23            | 1             | 0           | -2.076452               | 2.945250  | -2.499344 |
| 24            | 16            | 0           | 0.132927                | -1.119965 | -2.332560 |
| 25            | 6             | 0           | 0.510724                | -2.918863 | -2.179210 |
| 26            | 1             | 0           | 1.416658                | -3.119974 | -2.750701 |
| 27            | 1             | 0           | -0.325528               | -3.457641 | -2.633054 |
| 28            | 6             | 0           | 0.724387                | -3.332395 | -0.734867 |
| 29            | 1             | 0           | 0.797919                | -4.424356 | -0.671080 |
| 30            | 6             | 0           | 2.030285                | -2.780054 | -0.080099 |
| 31            | 8             | 0           | 2.231533                | -3.138884 | 1.072389  |
| 32            | 8             | 0           | 2.774304                | -2.023590 | -0.815658 |
| 33            | 7             | 0           | -0.409820               | -2.872017 | 0.128126  |
| 34            | 1             | 0           | -1.238860               | -3.446403 | -0.011536 |
| 35            | 1             | 0           | -0.134058               | -2.986073 | 1.105851  |

|    |    |   |           |           |           |
|----|----|---|-----------|-----------|-----------|
| 36 | 16 | 0 | -1.328811 | -0.585196 | 2.095618  |
| 37 | 6  | 0 | 0.443015  | -0.363487 | 2.604208  |
| 38 | 1  | 0 | 0.572733  | -0.884922 | 3.552558  |
| 39 | 1  | 0 | 1.123024  | -0.829174 | 1.891391  |
| 40 | 6  | 0 | 0.805635  | 1.106357  | 2.806797  |
| 41 | 1  | 0 | 0.171543  | 1.498250  | 3.615216  |
| 42 | 7  | 0 | 0.573107  | 1.935039  | 1.598965  |
| 43 | 1  | 0 | 0.905851  | 1.534655  | 0.247160  |
| 44 | 6  | 0 | 2.229189  | 1.385546  | 3.291773  |
| 45 | 8  | 0 | 2.797137  | 0.322996  | 3.873637  |
| 46 | 8  | 0 | 2.731007  | 2.480983  | 3.231402  |
| 47 | 1  | 0 | -6.729110 | -0.976277 | 1.566497  |
| 48 | 1  | 0 | 1.083351  | 2.812677  | 1.702921  |
| 49 | 1  | 0 | -3.365513 | -0.960600 | -1.102914 |
| 50 | 1  | 0 | 3.701955  | 0.566091  | 4.122321  |
| 51 | 17 | 0 | 3.507025  | 0.755529  | 0.421727  |
| 52 | 1  | 0 | -0.421753 | 2.134036  | 1.527276  |

HF=-2731.5040178\ZeroPoint=0.3590675\Thermal=0.3912034

G = 12.7 kcal mol<sup>-1</sup>

| Center Number | Atomic Number | Atomic Type | Coordinates (Angstroms) |           |           |
|---------------|---------------|-------------|-------------------------|-----------|-----------|
|               |               |             | X                       | Y         | Z         |
| 1             | 46            | 0           | 0.816663                | -0.618021 | -0.796291 |
| 2             | 46            | 0           | -2.171233               | -0.691923 | 0.302428  |
| 3             | 7             | 0           | 1.477696                | -0.555771 | 1.176710  |
| 4             | 7             | 0           | 2.608538                | -0.455387 | 1.699226  |
| 5             | 6             | 0           | 3.737415                | -0.288442 | 0.878839  |
| 6             | 6             | 0           | 3.924275                | -0.956505 | -0.339649 |
| 7             | 6             | 0           | 5.087549                | -0.735070 | -1.066187 |
| 8             | 1             | 0           | 5.240301                | -1.253554 | -2.005380 |
| 9             | 6             | 0           | 6.056553                | 0.148256  | -0.590011 |
| 10            | 6             | 0           | 5.883246                | 0.784587  | 0.641216  |
| 11            | 1             | 0           | 6.644490                | 1.457280  | 1.017709  |
| 12            | 6             | 0           | 4.740935                | 0.544392  | 1.392158  |
| 13            | 1             | 0           | 4.590607                | 1.013218  | 2.357101  |
| 14            | 6             | 0           | 0.417235                | -0.911378 | 2.083848  |
| 15            | 6             | 0           | -0.766481               | -0.126949 | 2.086802  |
| 16            | 6             | 0           | -1.874199               | -0.612392 | 2.805072  |
| 17            | 1             | 0           | -2.738986               | 0.025459  | 2.928957  |
| 18            | 6             | 0           | -1.802211               | -1.852188 | 3.479751  |
| 19            | 1             | 0           | -2.671951               | -2.220034 | 4.010001  |
| 20            | 6             | 0           | -0.620892               | -2.564053 | 3.491393  |
| 21            | 1             | 0           | -0.553999               | -3.505080 | 4.024624  |
| 22            | 6             | 0           | 0.505037                | -2.091445 | 2.789526  |
| 23            | 1             | 0           | 1.418522                | -2.671625 | 2.751809  |
| 24            | 16            | 0           | -0.690323               | -2.462535 | -0.313244 |
| 25            | 6             | 0           | -1.182711               | -2.784932 | -2.058980 |
| 26            | 1             | 0           | -2.183698               | -3.215623 | -2.056229 |
| 27            | 1             | 0           | -0.478714               | -3.523879 | -2.451580 |
| 28            | 6             | 0           | -1.178731               | -1.516858 | -2.893113 |
| 29            | 1             | 0           | -1.345141               | -1.770352 | -3.946737 |
| 30            | 6             | 0           | -2.291659               | -0.489374 | -2.531065 |
| 31            | 8             | 0           | -2.354023               | 0.501722  | -3.239317 |
| 32            | 8             | 0           | -3.078407               | -0.798859 | -1.547883 |
| 33            | 7             | 0           | 0.125530                | -0.796637 | -2.769661 |

|    |    |   |           |           |           |
|----|----|---|-----------|-----------|-----------|
| 34 | 1  | 0 | 0.859428  | -1.263368 | -3.299246 |
| 35 | 1  | 0 | 0.024509  | 0.137424  | -3.173190 |
| 36 | 16 | 0 | 1.713692  | 1.488453  | -1.387825 |
| 37 | 6  | 0 | 0.168748  | 2.476385  | -1.087023 |
| 38 | 1  | 0 | -0.017545 | 3.083294  | -1.972220 |
| 39 | 1  | 0 | -0.683527 | 1.804722  | -0.973442 |
| 40 | 6  | 0 | 0.280459  | 3.384301  | 0.148154  |
| 41 | 1  | 0 | 0.977514  | 4.202761  | -0.102573 |
| 42 | 7  | 0 | 0.697972  | 2.639060  | 1.334611  |
| 43 | 1  | 0 | -0.696315 | 0.901863  | 1.741543  |
| 44 | 6  | 0 | -1.038600 | 4.082364  | 0.474063  |
| 45 | 8  | 0 | -1.729868 | 4.412501  | -0.632495 |
| 46 | 8  | 0 | -1.400561 | 4.352772  | 1.591920  |
| 47 | 1  | 0 | 6.956382  | 0.325067  | -1.167625 |
| 48 | 1  | 0 | 0.595626  | 3.218671  | 2.161688  |
| 49 | 1  | 0 | 3.177858  | -1.659458 | -0.688729 |
| 50 | 1  | 0 | -2.574324 | 4.794922  | -0.349967 |
| 51 | 17 | 0 | -3.436160 | 1.240486  | 0.717789  |
| 52 | 1  | 0 | 1.668908  | 2.364662  | 1.233110  |

HF=-2731.5234602\ZeroPoint=0.3616845\Thermal=0.3949818

G = 6.4 kcal mol<sup>-1</sup>

| Center Number | Atomic Number | Atomic Type | Coordinates (Angstroms) |           |           |
|---------------|---------------|-------------|-------------------------|-----------|-----------|
|               |               |             | X                       | Y         | Z         |
| 1             | 46            | 0           | -0.655882               | -0.797268 | -0.655716 |
| 2             | 46            | 0           | 2.240459                | 0.072659  | -0.388504 |
| 3             | 7             | 0           | -0.954040               | 1.306445  | -0.545398 |
| 4             | 7             | 0           | -2.087973               | 1.829703  | -0.358623 |
| 5             | 6             | 0           | -3.266973               | 1.101456  | -0.532566 |
| 6             | 6             | 0           | -3.463012               | 0.169357  | -1.564448 |
| 7             | 6             | 0           | -4.693381               | -0.466125 | -1.689575 |
| 8             | 1             | 0           | -4.845293               | -1.182544 | -2.488746 |
| 9             | 6             | 0           | -5.732244               | -0.180197 | -0.803879 |
| 10            | 6             | 0           | -5.553929               | 0.786071  | 0.189201  |
| 11            | 1             | 0           | -6.370647               | 1.035113  | 0.856887  |
| 12            | 6             | 0           | -4.337976               | 1.444743  | 0.307224  |
| 13            | 1             | 0           | -4.190314               | 2.224479  | 1.046244  |
| 14            | 6             | 0           | 0.115358                | 2.263041  | -0.653686 |
| 15            | 6             | 0           | 1.482207                | 1.893656  | -0.608625 |
| 16            | 6             | 0           | 2.429792                | 2.924592  | -0.757021 |
| 17            | 1             | 0           | 3.480905                | 2.676075  | -0.701907 |
| 18            | 6             | 0           | 2.062276                | 4.245639  | -0.948654 |
| 19            | 1             | 0           | 2.827912                | 5.005540  | -1.063223 |
| 20            | 6             | 0           | 0.706531                | 4.595584  | -1.004760 |
| 21            | 1             | 0           | 0.407811                | 5.623552  | -1.174407 |
| 22            | 6             | 0           | -0.250557               | 3.616500  | -0.862870 |
| 23            | 1             | 0           | -1.298689               | 3.870008  | -0.924766 |
| 24            | 16            | 0           | 1.011974                | -0.519593 | -2.304725 |
| 25            | 6             | 0           | 1.495585                | -2.296717 | -2.483724 |
| 26            | 1             | 0           | 2.572952                | -2.327213 | -2.643747 |
| 27            | 1             | 0           | 0.987675                | -2.680940 | -3.372921 |
| 28            | 6             | 0           | 1.139000                | -3.096235 | -1.247096 |
| 29            | 1             | 0           | 1.284321                | -4.166864 | -1.438785 |
| 30            | 6             | 0           | 1.958427                | -2.760569 | 0.049153  |
| 31            | 8             | 0           | 1.521318                | -3.300380 | 1.071340  |

|    |    |   |           |           |           |
|----|----|---|-----------|-----------|-----------|
| 32 | 8  | 0 | 2.952348  | -1.983262 | -0.083940 |
| 33 | 7  | 0 | -0.286378 | -2.849584 | -0.879432 |
| 34 | 1  | 0 | -0.935713 | -3.235039 | -1.562265 |
| 35 | 1  | 0 | -0.451670 | -3.314811 | 0.015030  |
| 36 | 16 | 0 | -2.167958 | -1.445965 | 1.101622  |
| 37 | 6  | 0 | -1.107793 | -1.662620 | 2.591523  |
| 38 | 1  | 0 | -1.635198 | -2.357149 | 3.248251  |
| 39 | 1  | 0 | -0.138809 | -2.099432 | 2.342471  |
| 40 | 6  | 0 | -0.879139 | -0.318742 | 3.338720  |
| 41 | 1  | 0 | -0.784218 | -0.494254 | 4.411331  |
| 42 | 7  | 0 | -2.018903 | 0.626038  | 3.087681  |
| 43 | 1  | 0 | -2.515228 | 0.207890  | 2.234221  |
| 44 | 6  | 0 | 0.372026  | 0.444421  | 2.874817  |
| 45 | 8  | 0 | 1.442974  | -0.269258 | 3.029382  |
| 46 | 8  | 0 | 0.268062  | 1.581442  | 2.449901  |
| 47 | 1  | 0 | -6.685582 | -0.685423 | -0.904626 |
| 48 | 1  | 0 | -1.574604 | 1.524353  | 2.812091  |
| 49 | 1  | 0 | -2.666358 | -0.024076 | -2.271585 |
| 50 | 1  | 0 | 2.258151  | 0.151402  | 2.579558  |
| 51 | 17 | 0 | 3.625282  | 0.791235  | 1.434564  |
| 52 | 1  | 0 | -2.655752 | 0.739587  | 3.871637  |

-----

HF=-2731.5369156\ZeroPoint=0.3617884\Thermal=0.393823

G = 33.1 kcal mol<sup>-1</sup>

| Center Number | Atomic Number | Atomic Type | Coordinates (Angstroms) |           |           |
|---------------|---------------|-------------|-------------------------|-----------|-----------|
|               |               |             | X                       | Y         | Z         |
| 1             | 46            | 0           | -0.488735               | -0.924914 | -0.520503 |
| 2             | 46            | 0           | 2.408284                | 0.137238  | -0.106585 |
| 3             | 7             | 0           | -1.014038               | 1.095852  | -0.795442 |
| 4             | 7             | 0           | -2.169100               | 1.560980  | -0.931812 |
| 5             | 6             | 0           | -3.281570               | 0.710803  | -0.972969 |
| 6             | 6             | 0           | -3.334211               | -0.467772 | -1.729061 |
| 7             | 6             | 0           | -4.496224               | -1.232163 | -1.718460 |
| 8             | 1             | 0           | -4.542919               | -2.143209 | -2.303569 |
| 9             | 6             | 0           | -5.597294               | -0.831860 | -0.962572 |
| 10            | 6             | 0           | -5.557001               | 0.369051  | -0.248613 |
| 11            | 1             | 0           | -6.425701               | 0.696996  | 0.310819  |
| 12            | 6             | 0           | -4.413878               | 1.156776  | -0.277152 |
| 13            | 1             | 0           | -4.361750               | 2.106021  | 0.243297  |
| 14            | 6             | 0           | 0.023210                | 2.100163  | -0.931773 |
| 15            | 6             | 0           | 1.252498                | 1.969723  | -0.230701 |
| 16            | 6             | 0           | 2.141986                | 3.058977  | -0.320274 |
| 17            | 1             | 0           | 3.054838                | 3.016680  | 0.259776  |
| 18            | 6             | 0           | 1.879247                | 4.164050  | -1.125760 |
| 19            | 1             | 0           | 2.603283                | 4.968284  | -1.193141 |
| 20            | 6             | 0           | 0.691422                | 4.227006  | -1.850931 |
| 21            | 1             | 0           | 0.485830                | 5.072997  | -2.496974 |
| 22            | 6             | 0           | -0.246787               | 3.207219  | -1.738228 |
| 23            | 1             | 0           | -1.185401               | 3.264164  | -2.272334 |
| 24            | 16            | 0           | 1.262500                | -0.586675 | -2.062294 |
| 25            | 6             | 0           | 1.815275                | -2.340340 | -2.197697 |
| 26            | 1             | 0           | 2.877284                | -2.331639 | -2.442378 |
| 27            | 1             | 0           | 1.257625                | -2.794551 | -3.021212 |
| 28            | 6             | 0           | 1.599380                | -3.077257 | -0.893438 |
| 29            | 1             | 0           | 1.809378                | -4.145484 | -1.026427 |

|    |    |   |           |           |           |
|----|----|---|-----------|-----------|-----------|
| 30 | 6  | 0 | 2.508490  | -2.605801 | 0.291011  |
| 31 | 8  | 0 | 2.282619  | -3.155498 | 1.363553  |
| 32 | 8  | 0 | 3.403836  | -1.726300 | 0.012159  |
| 33 | 7  | 0 | 0.186429  | -2.914475 | -0.426790 |
| 34 | 1  | 0 | -0.459015 | -3.490680 | -0.963273 |
| 35 | 1  | 0 | 0.147545  | -3.241251 | 0.541269  |
| 36 | 16 | 0 | -2.057283 | -1.542291 | 1.202472  |
| 37 | 6  | 0 | -1.162674 | -1.168767 | 2.773401  |
| 38 | 1  | 0 | -1.512826 | -1.880549 | 3.525338  |
| 39 | 1  | 0 | -0.085842 | -1.289216 | 2.660095  |
| 40 | 6  | 0 | -1.437156 | 0.270182  | 3.227998  |
| 41 | 1  | 0 | -1.149693 | 0.421992  | 4.270875  |
| 42 | 7  | 0 | -2.898705 | 0.601009  | 3.073093  |
| 43 | 1  | 0 | -3.222386 | -0.001011 | 2.273813  |
| 44 | 6  | 0 | -0.724327 | 1.343028  | 2.355902  |
| 45 | 8  | 0 | 0.486070  | 1.067043  | 2.122019  |
| 46 | 8  | 0 | -1.404382 | 2.307624  | 1.982293  |
| 47 | 1  | 0 | -6.495320 | -1.438402 | -0.951685 |
| 48 | 1  | 0 | -2.881809 | 1.593166  | 2.741717  |
| 49 | 1  | 0 | -2.482558 | -0.758625 | -2.331011 |
| 50 | 1  | 0 | 1.003848  | 1.471221  | 1.019583  |
| 51 | 17 | 0 | 3.682904  | 0.898658  | 1.698601  |
| 52 | 1  | 0 | -3.466082 | 0.457880  | 3.904772  |

HF=-2731.4916323\ZeroPoint=0.3582337\Thermal=0.3899803

G = 9.2 kcal mol<sup>-1</sup>

| Center Number | Atomic Number | Atomic Type | Coordinates (Angstroms) |           |           |
|---------------|---------------|-------------|-------------------------|-----------|-----------|
|               |               |             | X                       | Y         | Z         |
| 1             | 46            | 0           | -0.265012               | -0.394445 | -1.068724 |
| 2             | 46            | 0           | 2.548232                | 0.194998  | 0.387525  |
| 3             | 7             | 0           | -0.926769               | 1.428438  | -0.285871 |
| 4             | 7             | 0           | -2.031295               | 2.001554  | -0.266168 |
| 5             | 6             | 0           | -3.149096               | 1.358323  | -0.830044 |
| 6             | 6             | 0           | -3.119836               | 0.762463  | -2.096827 |
| 7             | 6             | 0           | -4.275909               | 0.173847  | -2.595698 |
| 8             | 1             | 0           | -4.266059               | -0.280627 | -3.579501 |
| 9             | 6             | 0           | -5.443210               | 0.165601  | -1.832244 |
| 10            | 6             | 0           | -5.468242               | 0.782476  | -0.579234 |
| 11            | 1             | 0           | -6.377946               | 0.780526  | 0.009518  |
| 12            | 6             | 0           | -4.332466               | 1.410392  | -0.085949 |
| 13            | 1             | 0           | -4.322868               | 1.881562  | 0.888620  |
| 14            | 6             | 0           | 0.181914                | 2.241338  | 0.151394  |
| 15            | 6             | 0           | 1.021892                | 1.762232  | 1.190765  |
| 16            | 6             | 0           | 2.222295                | 2.454141  | 1.438150  |
| 17            | 1             | 0           | 2.810904                | 2.187874  | 2.305526  |
| 18            | 6             | 0           | 2.573834                | 3.580092  | 0.659837  |
| 19            | 1             | 0           | 3.510306                | 4.088331  | 0.853313  |
| 20            | 6             | 0           | 1.708342                | 4.045957  | -0.306557 |
| 21            | 1             | 0           | 1.959756                | 4.923638  | -0.890304 |
| 22            | 6             | 0           | 0.497956                | 3.372849  | -0.565770 |
| 23            | 1             | 0           | -0.160514               | 3.704068  | -1.358991 |
| 24            | 16            | 0           | 1.801975                | 0.609678  | -1.840061 |
| 25            | 6             | 0           | 2.435888                | -0.868701 | -2.737895 |
| 26            | 1             | 0           | 3.524718                | -0.826812 | -2.733936 |
| 27            | 1             | 0           | 2.079757                | -0.788742 | -3.768696 |

|                                                        |    |   |           |           |           |       |    |   |           |           |           |
|--------------------------------------------------------|----|---|-----------|-----------|-----------|-------|----|---|-----------|-----------|-----------|
| 28                                                     | 6  | 0 | 1.972054  | -2.158220 | -2.087970 | 26    | 1  | 0 | -0.926849 | 0.332603  | 4.054883  |
| 29                                                     | 1  | 0 | 2.257186  | -3.011384 | -2.715145 | 27    | 1  | 0 | 0.671028  | -0.418525 | 4.258202  |
| 30                                                     | 6  | 0 | 2.585210  | -2.447070 | -0.684992 | 28    | 6  | 0 | -0.649282 | -1.444601 | 2.882661  |
| 31                                                     | 8  | 0 | 2.255036  | -3.501609 | -0.167100 | 29    | 1  | 0 | -0.860529 | -2.199125 | 3.649583  |
| 32                                                     | 8  | 0 | 3.424000  | -1.575320 | -0.221231 | 30    | 6  | 0 | -1.959635 | -1.298616 | 2.051192  |
| 33                                                     | 7  | 0 | 0.488340  | -2.159564 | -1.913386 | 31    | 8  | 0 | -2.469811 | -0.143237 | 1.910068  |
| 34                                                     | 1  | 0 | 0.007068  | -2.300913 | -2.799750 | 32    | 8  | 0 | -2.368498 | -2.363074 | 1.569401  |
| 35                                                     | 1  | 0 | 0.228530  | -2.941454 | -1.307845 | 33    | 7  | 0 | 0.364674  | -1.991193 | 1.925732  |
| 36                                                     | 16 | 0 | -1.935264 | -1.722680 | -0.045945 | 34    | 1  | 0 | 1.170678  | -2.378428 | 2.412904  |
| 37                                                     | 6  | 0 | -1.147349 | -2.000298 | 1.614564  | 35    | 1  | 0 | -0.070124 | -2.747293 | 1.392752  |
| 38                                                     | 1  | 0 | -0.881631 | -3.054598 | 1.710747  | 36    | 1  | 0 | 6.114093  | -3.234617 | -0.337191 |
| 39                                                     | 1  | 0 | -0.228252 | -1.421089 | 1.696567  | 37    | 1  | 0 | 3.746239  | 0.038362  | 1.125442  |
| 40                                                     | 6  | 0 | -2.106120 | -1.605608 | 2.742085  | 38    | 16 | 0 | -2.870091 | 1.505737  | -0.938119 |
| 41                                                     | 1  | 0 | -1.607232 | -1.799941 | 3.699449  | 39    | 6  | 0 | -3.823405 | -0.055123 | -0.867357 |
| 42                                                     | 7  | 0 | -3.394582 | -2.319957 | 2.752131  | 40    | 1  | 0 | -4.191602 | -0.236156 | 0.139637  |
| 43                                                     | 1  | 0 | -3.688530 | -2.529355 | 1.800523  | 41    | 1  | 0 | -4.670480 | 0.077412  | -1.544423 |
| 44                                                     | 6  | 0 | -2.381609 | -0.088137 | 2.740593  | 42    | 6  | 0 | -2.981657 | -1.313514 | -1.278050 |
| 45                                                     | 8  | 0 | -1.529956 | 0.742194  | 2.541351  | 43    | 1  | 0 | -2.613648 | -1.787842 | -0.365994 |
| 46                                                     | 8  | 0 | -3.648219 | 0.237232  | 3.019244  | 44    | 7  | 0 | -1.821911 | -0.943497 | -2.143089 |
| 47                                                     | 1  | 0 | -6.338382 | -0.306589 | -2.220305 | 45    | 6  | 0 | -3.828235 | -2.302047 | -2.045200 |
| 48                                                     | 1  | 0 | -4.111884 | -0.628023 | 3.118666  | 46    | 1  | 0 | -1.733110 | 0.105098  | -2.054310 |
| 49                                                     | 1  | 0 | -2.210224 | 0.788701  | -2.684280 | 47    | 1  | 0 | -2.012550 | -1.210409 | -3.113868 |
| 50                                                     | 1  | 0 | 0.623049  | 1.047309  | 1.898904  | 48    | 1  | 0 | -0.932300 | -1.389810 | -1.834787 |
| 51                                                     | 17 | 0 | 3.060238  | -0.403627 | 2.596057  | 49    | 8  | 0 | -4.802574 | -2.811595 | -1.284774 |
| 52                                                     | 1  | 0 | -3.337333 | -3.191570 | 3.264867  | 50    | 8  | 0 | -3.668545 | -2.572562 | -3.215226 |
| -----                                                  |    |   |           |           |           | 51    | 1  | 0 | -5.331059 | -3.412332 | -1.831992 |
| HF=-2731.5300539\ZeroPoint=0.3621131\Thermal=0.3950847 |    |   |           |           |           | 52    | 17 | 0 | 0.944219  | -2.148799 | -1.181152 |
| -----                                                  |    |   |           |           |           | ----- |    |   |           |           |           |

G = -10.7 kcal mol<sup>-1</sup>

| Center Number | Atomic Number | Atomic Type | Coordinates (Angstroms) |           |           |
|---------------|---------------|-------------|-------------------------|-----------|-----------|
|               |               |             | X                       | Y         | Z         |
| 1             | 46            | 0           | 1.051100                | -0.527873 | 0.600071  |
| 2             | 46            | 0           | -1.242105               | 1.269617  | 0.772900  |
| 3             | 7             | 0           | 1.813241                | 0.980226  | -0.642501 |
| 4             | 7             | 0           | 2.862720                | 0.799659  | -1.305131 |
| 5             | 6             | 0           | 3.692673                | -0.294302 | -1.004911 |
| 6             | 6             | 0           | 4.087201                | -0.586098 | 0.309243  |
| 7             | 6             | 0           | 4.964807                | -1.640706 | 0.540129  |
| 8             | 1             | 0           | 5.286628                | -1.857090 | 1.552556  |
| 9             | 6             | 0           | 5.438941                | -2.407518 | -0.523590 |
| 10            | 6             | 0           | 5.063257                | -2.094041 | -1.831565 |
| 11            | 1             | 0           | 5.437701                | -2.683623 | -2.660032 |
| 12            | 6             | 0           | 4.214986                | -1.022763 | -2.078154 |
| 13            | 1             | 0           | 3.913786                | -0.763821 | -3.085397 |
| 14            | 6             | 0           | 1.170549                | 2.255393  | -0.832451 |
| 15            | 6             | 0           | -0.105830               | 2.522730  | -0.288564 |
| 16            | 6             | 0           | -0.618929               | 3.819841  | -0.485653 |
| 17            | 1             | 0           | -1.598847               | 4.061634  | -0.092378 |
| 18            | 6             | 0           | 0.083811                | 4.797773  | -1.173310 |
| 19            | 1             | 0           | -0.347639               | 5.785752  | -1.293854 |
| 20            | 6             | 0           | 1.347471                | 4.511956  | -1.704035 |
| 21            | 1             | 0           | 1.907792                | 5.272000  | -2.235775 |
| 22            | 6             | 0           | 1.886033                | 3.254229  | -1.530586 |
| 23            | 1             | 0           | 2.868073                | 3.020064  | -1.916713 |
| 24            | 16            | 0           | 0.598786                | 1.002322  | 2.310287  |
| 25            | 6             | 0           | -0.117348               | -0.183604 | 3.538232  |

HF=-2731.5640542\ZeroPoint=0.3631844\Thermal=0.3956817

G = 16.3 kcal mol<sup>-1</sup>

| Center Number | Atomic Number | Atomic Type | Coordinates (Angstroms) |           |           |
|---------------|---------------|-------------|-------------------------|-----------|-----------|
|               |               |             | X                       | Y         | Z         |
| 1             | 46            | 0           | -1.284842               | -0.742246 | 0.136304  |
| 2             | 46            | 0           | 1.612007                | -0.804998 | -0.894190 |
| 3             | 7             | 0           | -1.408097               | 1.158176  | -0.697882 |
| 4             | 7             | 0           | -2.385615               | 1.937211  | -0.582238 |
| 5             | 6             | 0           | -3.589711               | 1.467788  | -0.039787 |
| 6             | 6             | 0           | -4.147561               | 0.226248  | -0.381573 |
| 7             | 6             | 0           | -5.371877               | -0.142286 | 0.162911  |
| 8             | 1             | 0           | -5.815952               | -1.092268 | -0.110988 |
| 9             | 6             | 0           | -6.030373               | 0.706790  | 1.052111  |
| 10            | 6             | 0           | -5.484332               | 1.953337  | 1.366889  |
| 11            | 1             | 0           | -6.002519               | 2.616979  | 2.048687  |
| 12            | 6             | 0           | -4.282629               | 2.350438  | 0.798213  |
| 13            | 1             | 0           | -3.845162               | 3.315780  | 1.020448  |
| 14            | 6             | 0           | -0.313922               | 1.690414  | -1.473705 |
| 15            | 6             | 0           | 1.018122                | 1.272206  | -1.212510 |
| 16            | 6             | 0           | 2.030181                | 1.931711  | -1.937300 |
| 17            | 1             | 0           | 3.059990                | 1.704086  | -1.695200 |
| 18            | 6             | 0           | 1.743431                | 2.865014  | -2.930173 |
| 19            | 1             | 0           | 2.550514                | 3.324920  | -3.489108 |
| 20            | 6             | 0           | 0.420123                | 3.203070  | -3.203192 |
| 21            | 1             | 0           | 0.184599                | 3.917289  | -3.983848 |
| 22            | 6             | 0           | -0.608900               | 2.632432  | -2.461966 |
| 23            | 1             | 0           | -1.638698               | 2.906388  | -2.647444 |



|    |    |   |           |           |           |    |    |   |           |           |           |
|----|----|---|-----------|-----------|-----------|----|----|---|-----------|-----------|-----------|
| 24 | 16 | 0 | -0.493117 | -1.584667 | -1.890234 | 22 | 6  | 0 | 0.922285  | -2.067247 | -2.617635 |
| 25 | 6  | 0 | -0.466597 | -3.369012 | -1.404056 | 23 | 1  | 0 | 1.922644  | -1.948037 | -3.014533 |
| 26 | 1  | 0 | 0.312782  | -3.855804 | -1.989706 | 24 | 16 | 0 | 0.080631  | 1.145581  | -1.996752 |
| 27 | 1  | 0 | -1.437844 | -3.794952 | -1.667659 | 25 | 6  | 0 | -0.241600 | 2.950083  | -1.794273 |
| 28 | 6  | 0 | -0.167383 | -3.527093 | 0.074780  | 26 | 1  | 0 | -1.137004 | 3.194920  | -2.365113 |
| 29 | 1  | 0 | -0.284446 | -4.576322 | 0.372119  | 27 | 1  | 0 | 0.611539  | 3.487147  | -2.216298 |
| 30 | 6  | 0 | 1.281258  | -3.112653 | 0.489189  | 28 | 6  | 0 | -0.450063 | 3.300337  | -0.334589 |
| 31 | 8  | 0 | 2.087842  | -2.834869 | -0.474164 | 29 | 1  | 0 | -0.509511 | 4.389286  | -0.215505 |
| 32 | 8  | 0 | 1.506028  | -3.103060 | 1.696874  | 30 | 6  | 0 | -1.757594 | 2.738647  | 0.294966  |
| 33 | 7  | 0 | -1.097773 | -2.681326 | 0.887572  | 31 | 8  | 0 | -2.588639 | 2.145276  | -0.483639 |
| 34 | 1  | 0 | -2.026569 | -3.092824 | 0.953512  | 32 | 8  | 0 | -1.893795 | 2.947401  | 1.500230  |
| 35 | 1  | 0 | -0.720651 | -2.617603 | 1.836599  | 33 | 7  | 0 | 0.689032  | 2.783864  | 0.488837  |
| 36 | 1  | 0 | -6.978102 | 0.407217  | 1.484233  | 34 | 1  | 0 | 1.521588  | 3.358787  | 0.375835  |
| 37 | 1  | 0 | -3.647514 | -0.410627 | -1.100201 | 35 | 1  | 0 | 0.427740  | 2.829829  | 1.476006  |
| 38 | 16 | 0 | 3.647955  | -0.209099 | 0.108165  | 36 | 1  | 0 | 7.279735  | 0.215330  | 1.411027  |
| 39 | 6  | 0 | 3.139910  | -0.107864 | 1.864106  | 37 | 1  | 0 | 3.730105  | 0.727610  | -0.950267 |
| 40 | 1  | 0 | 2.489900  | -0.953412 | 2.105856  | 38 | 16 | 0 | -3.893245 | -0.617418 | 0.009093  |
| 41 | 1  | 0 | 4.046093  | -0.216555 | 2.461710  | 39 | 6  | 0 | -3.793176 | 0.074443  | 1.701966  |
| 42 | 6  | 0 | 2.467970  | 1.222989  | 2.240947  | 40 | 1  | 0 | -3.692992 | 1.158999  | 1.643714  |
| 43 | 1  | 0 | 2.290886  | 1.217579  | 3.327380  | 41 | 1  | 0 | -4.752491 | -0.165729 | 2.166135  |
| 44 | 7  | 0 | 1.197960  | 1.431816  | 1.526300  | 42 | 6  | 0 | -2.645989 | -0.488478 | 2.565626  |
| 45 | 6  | 0 | 3.360328  | 2.426890  | 1.968056  | 43 | 1  | 0 | -2.862067 | -0.190343 | 3.605834  |
| 46 | 1  | 0 | 1.222319  | 1.117128  | 0.103127  | 44 | 7  | 0 | -1.356691 | -0.007294 | 2.089747  |
| 47 | 1  | 0 | 0.933682  | 2.414325  | 1.561989  | 45 | 6  | 0 | -2.654728 | -2.006766 | 2.564433  |
| 48 | 1  | 0 | 0.439661  | 0.883301  | 1.940083  | 46 | 1  | 0 | -0.761992 | -1.785977 | 0.334846  |
| 49 | 8  | 0 | 4.593055  | 2.260117  | 2.480098  | 47 | 1  | 0 | -0.574836 | -0.441730 | 2.569111  |
| 50 | 8  | 0 | 3.001083  | 3.434550  | 1.409744  | 48 | 1  | 0 | -1.299034 | 0.994178  | 2.236660  |
| 51 | 1  | 0 | 5.108400  | 3.053802  | 2.272816  | 49 | 8  | 0 | -3.813790 | -2.495005 | 3.059112  |
| 52 | 17 | 0 | -1.729765 | 0.028675  | 2.346890  | 50 | 8  | 0 | -1.748450 | -2.718417 | 2.202985  |
|    |    |   |           |           |           | 51 | 1  | 0 | -3.766739 | -3.460822 | 3.006082  |
|    |    |   |           |           |           | 52 | 17 | 0 | 2.086741  | 0.605658  | 2.228581  |

HF=-2731.517747\ZeroPoint=0.3586302\Thermal=0.3907581

G = 3.2 kcal mol<sup>-1</sup>

| Center Number | Atomic Number | Atomic Type | Coordinates (Angstroms) |           |           |
|---------------|---------------|-------------|-------------------------|-----------|-----------|
|               |               |             | X                       | Y         | Z         |
| 1             | 46            | 0           | 1.233670                | 0.815773  | 0.038212  |
| 2             | 46            | 0           | -1.938016               | 0.181565  | -0.990901 |
| 3             | 7             | 0           | 1.724996                | -1.123192 | -0.533834 |
| 4             | 7             | 0           | 2.786439                | -1.777901 | -0.470093 |
| 5             | 6             | 0           | 3.955784                | -1.179197 | 0.029133  |
| 6             | 6             | 0           | 4.350011                | 0.124883  | -0.298516 |
| 7             | 6             | 0           | 5.552817                | 0.614613  | 0.192405  |
| 8             | 1             | 0           | 5.868137                | 1.618970  | -0.064597 |
| 9             | 6             | 0           | 6.349723                | -0.178664 | 1.017877  |
| 10            | 6             | 0           | 5.964160                | -1.486050 | 1.321822  |
| 11            | 1             | 0           | 6.589728                | -2.104539 | 1.954189  |
| 12            | 6             | 0           | 4.785425                | -2.001715 | 0.801344  |
| 13            | 1             | 0           | 4.472257                | -3.017324 | 1.009641  |
| 14            | 6             | 0           | 0.674672                | -1.751431 | -1.294633 |
| 15            | 6             | 0           | -0.618268               | -1.872335 | -0.735652 |
| 16            | 6             | 0           | -1.658868               | -2.306742 | -1.574666 |
| 17            | 1             | 0           | -2.615769               | -2.549479 | -1.133840 |
| 18            | 6             | 0           | -1.415523               | -2.576111 | -2.938972 |
| 19            | 1             | 0           | -2.236013               | -2.889710 | -3.572824 |
| 20            | 6             | 0           | -0.135449               | -2.474125 | -3.446991 |
| 21            | 1             | 0           | 0.061355                | -2.692940 | -4.489738 |

HF=-2731.541891\ZeroPoint=0.3625544\Thermal=0.395332

G = -13.0 kcal mol<sup>-1</sup>

| Center Number | Atomic Number | Atomic Type | Coordinates (Angstroms) |           |           |
|---------------|---------------|-------------|-------------------------|-----------|-----------|
|               |               |             | X                       | Y         | Z         |
| 1             | 46            | 0           | -1.202635               | -0.643811 | -0.411379 |
| 2             | 46            | 0           | 1.494499                | 0.314306  | -1.190321 |
| 3             | 7             | 0           | -1.456506               | 1.379354  | 0.088815  |
| 4             | 7             | 0           | -2.450206               | 1.764104  | 0.748540  |
| 5             | 6             | 0           | -3.554051               | 0.915054  | 0.919956  |
| 6             | 6             | 0           | -4.124539               | 0.211206  | -0.151094 |
| 7             | 6             | 0           | -5.260227               | -0.561199 | 0.068268  |
| 8             | 1             | 0           | -5.716119               | -1.090862 | -0.760526 |
| 9             | 6             | 0           | -5.818206               | -0.644591 | 1.343402  |
| 10            | 6             | 0           | -5.261267               | 0.081104  | 2.398842  |
| 11            | 1             | 0           | -5.699717               | 0.023801  | 3.388012  |
| 12            | 6             | 0           | -4.149715               | 0.884367  | 2.185311  |
| 13            | 1             | 0           | -3.703885               | 1.455215  | 2.990042  |
| 14            | 6             | 0           | -0.518722               | 2.418304  | -0.264871 |
| 15            | 6             | 0           | 0.746426                | 2.125508  | -0.818276 |
| 16            | 6             | 0           | 1.554588                | 3.216465  | -1.185341 |
| 17            | 1             | 0           | 2.533824                | 3.029820  | -1.609015 |
| 18            | 6             | 0           | 1.142353                | 4.530402  | -1.015162 |
| 19            | 1             | 0           | 1.795721                | 5.341798  | -1.316865 |

|    |    |   |           |           |           |    |    |   |           |           |           |
|----|----|---|-----------|-----------|-----------|----|----|---|-----------|-----------|-----------|
| 20 | 6  | 0 | -0.112952 | 4.803513  | -0.462786 | 18 | 6  | 0 | -1.454218 | -3.845005 | -2.063854 |
| 21 | 1  | 0 | -0.448378 | 5.825470  | -0.331797 | 19 | 1  | 0 | -2.179138 | -4.537232 | -2.476041 |
| 22 | 6  | 0 | -0.935497 | 3.757500  | -0.098352 | 20 | 6  | 0 | -0.109100 | -3.955796 | -2.399050 |
| 23 | 1  | 0 | -1.916712 | 3.950203  | 0.311602  | 21 | 1  | 0 | 0.223541  | -4.727588 | -3.083760 |
| 24 | 16 | 0 | -0.437756 | -0.121790 | -2.564802 | 22 | 6  | 0 | 0.828270  | -3.085630 | -1.840824 |
| 25 | 6  | 0 | -0.087569 | -1.850930 | -3.138729 | 23 | 1  | 0 | 1.880032  | -3.187294 | -2.074298 |
| 26 | 1  | 0 | 0.813450  | -1.817695 | -3.750915 | 24 | 16 | 0 | -0.135934 | 0.767569  | -2.309821 |
| 27 | 1  | 0 | -0.929639 | -2.161204 | -3.762251 | 25 | 6  | 0 | -0.518823 | 2.572217  | -2.458823 |
| 28 | 6  | 0 | 0.108972  | -2.811806 | -1.978660 | 26 | 1  | 0 | -1.498163 | 2.661603  | -2.928351 |
| 29 | 1  | 0 | 0.124069  | -3.845560 | -2.346346 | 27 | 1  | 0 | 0.234620  | 3.016705  | -3.113551 |
| 30 | 6  | 0 | 1.414018  | -2.607981 | -1.163669 | 28 | 6  | 0 | -0.533941 | 3.246326  | -1.099788 |
| 31 | 8  | 0 | 2.256700  | -1.756159 | -1.552019 | 29 | 1  | 0 | -0.610713 | 4.334336  | -1.219120 |
| 32 | 8  | 0 | 1.485039  | -3.303784 | -0.123653 | 30 | 6  | 0 | -1.708862 | 2.820324  | -0.173199 |
| 33 | 7  | 0 | -1.003827 | -2.646393 | -0.994369 | 31 | 8  | 0 | -2.627540 | 2.092937  | -0.667503 |
| 34 | 1  | 0 | -1.892453 | -2.964923 | -1.375490 | 32 | 8  | 0 | -1.626671 | 3.229665  | 0.997090  |
| 35 | 1  | 0 | -0.799935 | -3.199758 | -0.160073 | 33 | 7  | 0 | 0.724073  | 2.916742  | -0.360500 |
| 36 | 16 | 0 | 3.340873  | 0.890652  | 0.185300  | 34 | 1  | 0 | 1.531467  | 3.383281  | -0.769475 |
| 37 | 6  | 0 | 3.956921  | -0.688138 | 0.912318  | 35 | 1  | 0 | 0.637721  | 3.239412  | 0.605311  |
| 38 | 1  | 0 | 3.927931  | -1.467152 | 0.149941  | 36 | 16 | 0 | -3.745274 | -0.646848 | 0.481176  |
| 39 | 1  | 0 | 4.996475  | -0.522236 | 1.202592  | 37 | 6  | 0 | -3.610909 | 0.149411  | 2.129222  |
| 40 | 6  | 0 | 3.185263  | -1.163850 | 2.152697  | 38 | 1  | 0 | -3.833668 | 1.216881  | 2.049173  |
| 41 | 1  | 0 | 3.598552  | -2.111006 | 2.501030  | 39 | 1  | 0 | -4.397778 | -0.324807 | 2.720221  |
| 42 | 7  | 0 | 1.759495  | -1.438922 | 1.775643  | 40 | 6  | 0 | -2.292905 | -0.066219 | 2.882542  |
| 43 | 6  | 0 | 3.189057  | -0.226908 | 3.383972  | 41 | 1  | 0 | -2.424199 | 0.211183  | 3.929677  |
| 44 | 8  | 0 | 2.936109  | 1.060887  | 3.166595  | 42 | 7  | 0 | -1.233018 | 0.832030  | 2.315916  |
| 45 | 8  | 0 | 3.364289  | -0.679988 | 4.486479  | 43 | 6  | 0 | -1.796737 | -1.541043 | 2.812910  |
| 46 | 1  | 0 | -6.696509 | -1.256941 | 1.511447  | 44 | 8  | 0 | -0.861220 | -1.756219 | 1.944599  |
| 47 | 1  | 0 | 1.348500  | -0.629436 | 1.288683  | 45 | 8  | 0 | -2.308923 | -2.331480 | 3.583905  |
| 48 | 1  | 0 | -3.709680 | 0.314241  | -1.146162 | 46 | 1  | 0 | 6.951476  | 0.634180  | 1.134128  |
| 49 | 1  | 0 | 2.924035  | 1.261785  | 2.186058  | 47 | 1  | 0 | -0.975160 | 0.470458  | 1.385248  |
| 50 | 17 | 0 | -1.435691 | -1.393239 | 1.849764  | 48 | 1  | 0 | 3.537056  | 0.279756  | -1.445984 |
| 51 | 1  | 0 | 1.143830  | -1.647635 | 2.565190  | 49 | 1  | 0 | -1.078624 | -1.652812 | 0.599291  |
| 52 | 1  | 0 | 1.708893  | -2.250199 | 1.092471  | 50 | 17 | 0 | 1.964660  | 1.152608  | 1.876519  |
|    |    |   |           |           |           | 51 | 1  | 0 | -0.351886 | 0.812774  | 2.838614  |
|    |    |   |           |           |           | 52 | 1  | 0 | -1.537527 | 1.811081  | 2.162249  |

HF=-2731.5686096\ZeroPoint=0.3635062\Thermal=0.3956442

G = 20.2 kcal mol<sup>-1</sup>

| Center Number | Atomic Number | Atomic Type | Coordinates (Angstroms) |           |           |
|---------------|---------------|-------------|-------------------------|-----------|-----------|
|               |               |             | X                       | Y         | Z         |
| 1             | 46            | 0           | 1.103266                | 0.855712  | -0.327175 |
| 2             | 46            | 0           | -1.908306               | 0.055961  | -0.781688 |
| 3             | 7             | 0           | 1.422265                | -1.208255 | -0.427024 |
| 4             | 7             | 0           | 2.468375                | -1.817826 | -0.110460 |
| 5             | 6             | 0           | 3.636018                | -1.108434 | 0.202198  |
| 6             | 6             | 0           | 4.096110                | -0.034125 | -0.572893 |
| 7             | 6             | 0           | 5.296610                | 0.579528  | -0.238397 |
| 8             | 1             | 0           | 5.666520                | 1.400432  | -0.841540 |
| 9             | 6             | 0           | 6.023567                | 0.141380  | 0.868148  |
| 10            | 6             | 0           | 5.572683                | -0.946113 | 1.620216  |
| 11            | 1             | 0           | 6.144595                | -1.291043 | 2.473215  |
| 12            | 6             | 0           | 4.398258                | -1.596502 | 1.270321  |
| 13            | 1             | 0           | 4.031830                | -2.446525 | 1.832166  |
| 14            | 6             | 0           | 0.405265                | -2.074453 | -0.985837 |
| 15            | 6             | 0           | -0.965313               | -1.896996 | -0.654782 |
| 16            | 6             | 0           | -1.865379               | -2.843783 | -1.186198 |
| 17            | 1             | 0           | -2.900679               | -2.796210 | -0.873652 |

HF=-2731.5129244\ZeroPoint=0.3588269\Thermal=0.3907405

G = 13.2 kcal mol<sup>-1</sup>

| Center Number | Atomic Number | Atomic Type | Coordinates (Angstroms) |           |           |
|---------------|---------------|-------------|-------------------------|-----------|-----------|
|               |               |             | X                       | Y         | Z         |
| 1             | 46            | 0           | 1.157000                | 0.852091  | -0.309785 |
| 2             | 46            | 0           | -1.980156               | -0.080935 | -0.875749 |
| 3             | 7             | 0           | 1.605810                | -1.181172 | -0.456833 |
| 4             | 7             | 0           | 2.645088                | -1.824830 | -0.216285 |
| 5             | 6             | 0           | 3.809404                | -1.157073 | 0.200881  |
| 6             | 6             | 0           | 4.266340                | 0.021997  | -0.402173 |
| 7             | 6             | 0           | 5.458980                | 0.586462  | 0.029996  |
| 8             | 1             | 0           | 5.825958                | 1.491769  | -0.438934 |
| 9             | 6             | 0           | 6.179710                | -0.006001 | 1.066925  |
| 10            | 6             | 0           | 5.729865                | -1.193355 | 1.648579  |
| 11            | 1             | 0           | 6.296452                | -1.656460 | 2.447370  |
| 12            | 6             | 0           | 4.563388                | -1.792699 | 1.194302  |
| 13            | 1             | 0           | 4.199715                | -2.719662 | 1.619910  |
| 14            | 6             | 0           | 0.564186                | -1.946382 | -1.106690 |
| 15            | 6             | 0           | -0.704115               | -2.070716 | -0.489548 |

|    |    |   |           |           |           |    |    |   |           |           |           |
|----|----|---|-----------|-----------|-----------|----|----|---|-----------|-----------|-----------|
| 16 | 6  | 0 | -1.740797 | -2.647460 | -1.248122 | 36 | 16 | 0 | -3.718268 | -0.803669 | 0.487708  |
| 17 | 1  | 0 | -2.674846 | -2.879261 | -0.753761 | 37 | 6  | 0 | -3.677707 | 0.190620  | 2.030754  |
| 18 | 6  | 0 | -1.518641 | -3.065179 | -2.577415 | 38 | 1  | 0 | -3.766819 | 1.249606  | 1.779171  |
| 19 | 1  | 0 | -2.335068 | -3.492234 | -3.146752 | 39 | 1  | 0 | -4.599061 | -0.118225 | 2.530365  |
| 20 | 6  | 0 | -0.256370 | -2.966551 | -3.126541 | 40 | 6  | 0 | -2.526116 | -0.055757 | 3.015470  |
| 21 | 1  | 0 | -0.069922 | -3.306335 | -4.138447 | 41 | 1  | 0 | -2.844033 | 0.250004  | 4.012879  |
| 22 | 6  | 0 | 0.800528  | -2.407602 | -2.384366 | 42 | 7  | 0 | -1.304277 | 0.742892  | 2.642957  |
| 23 | 1  | 0 | 1.783685  | -2.292437 | -2.823675 | 43 | 6  | 0 | -2.053566 | -1.558781 | 3.048810  |
| 24 | 16 | 0 | -0.129553 | 0.762157  | -2.296569 | 44 | 8  | 0 | -0.939819 | -1.733166 | 2.461485  |
| 25 | 6  | 0 | -0.572376 | 2.553686  | -2.391073 | 45 | 8  | 0 | -2.807917 | -2.349077 | 3.604269  |
| 26 | 1  | 0 | -1.555684 | 2.628603  | -2.854805 | 46 | 1  | 0 | 7.101768  | 0.447889  | 1.411033  |
| 27 | 1  | 0 | 0.162600  | 3.046483  | -3.032096 | 47 | 1  | 0 | -0.709251 | 0.020065  | 2.168276  |
| 28 | 6  | 0 | -0.602218 | 3.181289  | -1.010753 | 48 | 1  | 0 | 3.706384  | 0.463634  | -1.217356 |
| 29 | 1  | 0 | -0.732314 | 4.268092  | -1.090351 | 49 | 1  | 0 | -0.804020 | -1.942360 | 0.593154  |
| 30 | 6  | 0 | -1.737501 | 2.672225  | -0.085395 | 50 | 17 | 0 | 1.989624  | 1.119025  | 1.885773  |
| 31 | 8  | 0 | -2.645028 | 1.927900  | -0.584407 | 51 | 1  | 0 | -0.764281 | 1.023737  | 3.459696  |
| 32 | 8  | 0 | -1.660043 | 3.044459  | 1.094928  | 52 | 1  | 0 | -1.493068 | 1.588889  | 2.076778  |
| 33 | 7  | 0 | 0.676003  | 2.887009  | -0.293133 |    |    |   |           |           |           |
| 34 | 1  | 0 | 1.457522  | 3.399984  | -0.696736 |    |    |   |           |           |           |
| 35 | 1  | 0 | 0.587129  | 3.175235  | 0.683522  |    |    |   |           |           |           |

-----  
HF=-2731.5269685\ZeroPoint=0.362854\Thermal=0.3951275

## Structures from Table S10

**Table S10.** Free energies for the pre- and postreaction complexes and the transition states for **the D transfer from Ala<sup>3D</sup>·DCI to the palladated complexes** with L-alanine. Free energies relative to **M1-Ala<sup>2D</sup>-1** for the monopalladated and **D1-Ala<sup>2D</sup>-1** for the dipalladated complexes (in kcal mol<sup>-1</sup>).

| D-source→                    | Ala <sup>3D</sup> ·DCI | Ala <sup>3D</sup> ·DCI       |
|------------------------------|------------------------|------------------------------|
| Donor group→                 | COOD                   | ND <sub>3</sub> <sup>+</sup> |
| <b>M1-Ala<sup>2D</sup>-1</b> |                        |                              |
| Prereaction complex          | <b>-0.8</b>            | -7.0                         |
| Transition state             | <b>17.7</b>            | 22.0                         |
| Postreaction complex         | <b>13.6</b>            | 16.0                         |
| <b>D1-Ala<sup>2D</sup>-1</b> |                        |                              |
| Prereaction complex          | -12.4                  | <b>-13.9</b>                 |
| Transition state             | 17.8                   | <b>14.8</b>                  |
| Postreaction complex         | 15.4                   | <b>14.1</b>                  |

G = -0.8 kcal mol<sup>-1</sup>

| Center Number | Atomic Number | Atomic Type | Coordinates (Angstroms) |           |           |
|---------------|---------------|-------------|-------------------------|-----------|-----------|
|               |               |             | X                       | Y         | Z         |
| 1             | 46            | 0           | 0.328977                | -0.060993 | -1.034162 |
| 2             | 7             | 0           | 1.938718                | 0.897969  | -0.078133 |
| 3             | 7             | 0           | 1.868566                | 2.158699  | 0.020494  |
| 4             | 6             | 0           | 0.726735                | 2.704511  | -0.550192 |
| 5             | 6             | 0           | -0.234575               | 1.835203  | -1.130251 |
| 6             | 6             | 0           | -1.361980               | 2.430814  | -1.702651 |
| 7             | 1             | 0           | -2.126819               | 1.821067  | -2.173692 |
| 8             | 6             | 0           | -1.529150               | 3.824821  | -1.691107 |
| 9             | 6             | 0           | -0.574286               | 4.654690  | -1.102215 |
| 10            | 1             | 0           | -0.715604               | 5.728701  | -1.094660 |
| 11            | 6             | 0           | 0.563065                | 4.093925  | -0.528519 |
| 12            | 1             | 0           | 1.326305                | 4.709877  | -0.067409 |
| 13            | 6             | 0           | 3.089955                | 0.291221  | 0.506152  |
| 14            | 6             | 0           | 3.121208                | -1.101655 | 0.627715  |
| 15            | 6             | 0           | 4.227027                | -1.711044 | 1.216776  |
| 16            | 1             | 0           | 4.245848                | -2.790438 | 1.309182  |
| 17            | 6             | 0           | 5.296234                | -0.946629 | 1.673548  |
| 18            | 1             | 0           | 6.156031                | -1.427134 | 2.126747  |
| 19            | 6             | 0           | 5.264354                | 0.446002  | 1.538249  |
| 20            | 1             | 0           | 6.099927                | 1.044359  | 1.883285  |
| 21            | 6             | 0           | 4.170129                | 1.069110  | 0.959843  |
| 22            | 1             | 0           | 4.136306                | 2.143771  | 0.849621  |
| 23            | 6             | 0           | -2.299716               | -3.121529 | -2.558585 |
| 24            | 1             | 0           | -3.331610               | -2.758873 | -2.526690 |
| 25            | 1             | 0           | -2.281522               | -4.182557 | -2.308805 |
| 26            | 6             | 0           | -1.417093               | -2.364317 | -1.577304 |
| 27            | 1             | 0           | -1.821097               | -2.438575 | -0.564724 |
| 28            | 7             | 0           | -1.370439               | -0.896960 | -1.879917 |
| 29            | 1             | 0           | -2.197106               | -0.439754 | -1.495527 |
| 30            | 6             | 0           | 0.020724                | -2.936889 | -1.471952 |
| 31            | 8             | 0           | 0.198013                | -4.132345 | -1.632725 |
| 32            | 8             | 0           | 0.933256                | -2.068141 | -1.162293 |

|    |    |   |           |           |           |
|----|----|---|-----------|-----------|-----------|
| 33 | 1  | 0 | -2.413911 | 4.259275  | -2.144321 |
| 34 | 1  | 0 | -1.352622 | -0.747734 | -2.886768 |
| 35 | 1  | 0 | 2.305391  | -1.703025 | 0.248095  |
| 36 | 1  | 0 | -2.009860 | 2.022744  | 0.360798  |
| 37 | 6  | 0 | -2.705398 | 0.664286  | 3.741386  |
| 38 | 1  | 0 | -3.144728 | 0.295077  | 4.672019  |
| 39 | 1  | 0 | -2.680684 | 1.752749  | 3.780770  |
| 40 | 6  | 0 | -3.541590 | 0.191865  | 2.552350  |
| 41 | 1  | 0 | -4.547707 | 0.633546  | 2.624383  |
| 42 | 7  | 0 | -3.604608 | -1.281631 | 2.514879  |
| 43 | 1  | 0 | -2.023530 | -1.761386 | 2.296428  |
| 44 | 6  | 0 | -3.018961 | 0.652259  | 1.192437  |
| 45 | 8  | 0 | -2.357622 | 1.801140  | 1.249286  |
| 46 | 8  | 0 | -3.242601 | 0.036276  | 0.169251  |
| 47 | 1  | 0 | -4.127544 | -1.600503 | 1.703659  |
| 48 | 1  | 0 | -4.043854 | -1.648480 | 3.353196  |
| 49 | 17 | 0 | -0.696198 | -1.922379 | 2.019833  |
| 50 | 1  | 0 | -1.682774 | 0.292926  | 3.666084  |
| 51 | 1  | 0 | -1.920524 | -3.021400 | -3.580874 |

HF=-1808.3106097\ZeroPoint=0.37864\Thermal=0.4090932

G = 17.7 kcal mol<sup>-1</sup>

| Center Number | Atomic Number | Atomic Type | Coordinates (Angstroms) |           |           |
|---------------|---------------|-------------|-------------------------|-----------|-----------|
|               |               |             | X                       | Y         | Z         |
| 1             | 46            | 0           | -0.159054               | -0.291441 | -0.798906 |
| 2             | 7             | 0           | -1.952473               | -0.412481 | 0.205598  |
| 3             | 7             | 0           | -2.394433               | -1.563267 | 0.488456  |
| 4             | 6             | 0           | -1.519574               | -2.594169 | 0.143150  |
| 5             | 6             | 0           | -0.154355               | -2.310143 | -0.144209 |
| 6             | 6             | 0           | 0.662351                | -3.371019 | -0.551633 |
| 7             | 1             | 0           | 1.716365                | -3.182578 | -0.728097 |
| 8             | 6             | 0           | 0.153098                | -4.664228 | -0.658545 |
| 9             | 6             | 0           | -1.183684               | -4.925532 | -0.341677 |
| 10            | 1             | 0           | -1.568413               | -5.936085 | -0.414106 |

|    |    |   |           |           |           |    |    |   |           |           |           |
|----|----|---|-----------|-----------|-----------|----|----|---|-----------|-----------|-----------|
| 11 | 6  | 0 | -2.023272 | -3.895079 | 0.069943  | 10 | 1  | 0 | -1.054716 | 5.954096  | 1.027897  |
| 12 | 1  | 0 | -3.065014 | -4.074777 | 0.306710  | 11 | 6  | 0 | -1.660280 | 4.066542  | 0.209301  |
| 13 | 6  | 0 | -2.754863 | 0.707995  | 0.537845  | 12 | 1  | 0 | -2.699345 | 4.341002  | 0.076272  |
| 14 | 6  | 0 | -2.121938 | 1.951127  | 0.652832  | 13 | 6  | 0 | -2.973021 | -0.277307 | -0.747871 |
| 15 | 6  | 0 | -2.878286 | 3.064089  | 1.005352  | 14 | 6  | 0 | -2.575258 | -1.601004 | -0.963082 |
| 16 | 1  | 0 | -2.386894 | 4.024100  | 1.104821  | 15 | 6  | 0 | -3.528075 | -2.538164 | -1.348660 |
| 17 | 6  | 0 | -4.249909 | 2.944510  | 1.214624  | 16 | 1  | 0 | -3.219225 | -3.560471 | -1.528648 |
| 18 | 1  | 0 | -4.837053 | 3.818683  | 1.472544  | 17 | 6  | 0 | -4.862399 | -2.167390 | -1.491769 |
| 19 | 6  | 0 | -4.876984 | 1.699708  | 1.083553  | 18 | 1  | 0 | -5.602908 | -2.906239 | -1.776583 |
| 20 | 1  | 0 | -5.946474 | 1.611688  | 1.235638  | 19 | 6  | 0 | -5.254674 | -0.843590 | -1.259658 |
| 21 | 6  | 0 | -4.136292 | 0.576679  | 0.751424  | 20 | 1  | 0 | -6.295895 | -0.559951 | -1.359016 |
| 22 | 1  | 0 | -4.603599 | -0.392709 | 0.643226  | 21 | 6  | 0 | -4.316581 | 0.107043  | -0.892704 |
| 23 | 6  | 0 | 2.804259  | 1.313641  | -3.433866 | 22 | 1  | 0 | -4.603172 | 1.132389  | -0.703146 |
| 24 | 1  | 0 | 3.798097  | 0.952570  | -3.154334 | 23 | 6  | 0 | 2.197525  | -2.251786 | 3.173421  |
| 25 | 1  | 0 | 2.879953  | 2.349428  | -3.766585 | 24 | 1  | 0 | 3.245819  | -2.043259 | 2.947509  |
| 26 | 6  | 0 | 1.843568  | 1.240129  | -2.257848 | 25 | 1  | 0 | 2.068387  | -3.321229 | 3.346634  |
| 27 | 1  | 0 | 2.224940  | 1.802411  | -1.400897 | 26 | 6  | 0 | 1.307889  | -1.822184 | 2.017739  |
| 28 | 7  | 0 | 1.651385  | -0.162568 | -1.768873 | 27 | 1  | 0 | 1.609069  | -2.316171 | 1.088874  |
| 29 | 1  | 0 | 2.360376  | -0.435551 | -1.075123 | 28 | 7  | 0 | 1.413890  | -0.359282 | 1.732149  |
| 30 | 6  | 0 | 0.471703  | 1.880975  | -2.549394 | 29 | 1  | 0 | 2.313539  | -0.182710 | 1.228334  |
| 31 | 8  | 0 | 0.365606  | 2.812163  | -3.319683 | 30 | 6  | 0 | -0.167170 | -2.196106 | 2.207254  |
| 32 | 8  | 0 | -0.534873 | 1.381798  | -1.866938 | 31 | 8  | 0 | -0.518493 | -3.176681 | 2.825156  |
| 33 | 1  | 0 | 0.801657  | -5.476741 | -0.966330 | 32 | 8  | 0 | -1.027632 | -1.391017 | 1.607300  |
| 34 | 1  | 0 | 1.679905  | -0.818764 | -2.546258 | 33 | 1  | 0 | 1.307751  | 5.274891  | 1.344674  |
| 35 | 1  | 0 | -1.056076 | 2.046261  | 0.491678  | 34 | 1  | 0 | 1.423306  | 0.168252  | 2.603678  |
| 36 | 1  | 0 | 0.501492  | -1.573441 | 0.703972  | 35 | 1  | 0 | -1.536446 | -1.884246 | -0.865081 |
| 37 | 6  | 0 | 2.044461  | 0.459756  | 3.909859  | 36 | 1  | 0 | 0.539941  | 1.540551  | -0.558874 |
| 38 | 1  | 0 | 2.580024  | 0.953215  | 4.726937  | 37 | 6  | 0 | 3.190136  | 0.219601  | -3.335289 |
| 39 | 1  | 0 | 1.494047  | -0.388455 | 4.314979  | 38 | 1  | 0 | 3.607382  | -0.209516 | -4.251845 |
| 40 | 6  | 0 | 3.011777  | -0.040477 | 2.848905  | 39 | 1  | 0 | 3.253289  | 1.305579  | -3.394564 |
| 41 | 1  | 0 | 3.749372  | -0.725046 | 3.279935  | 40 | 6  | 0 | 3.955856  | -0.241489 | -2.106671 |
| 42 | 7  | 0 | 3.761939  | 1.106000  | 2.232154  | 41 | 1  | 0 | 5.022893  | -0.015942 | -2.199943 |
| 43 | 1  | 0 | 3.000566  | 1.788002  | 1.776320  | 42 | 7  | 0 | 3.833372  | -1.730631 | -1.917740 |
| 44 | 6  | 0 | 2.355493  | -0.781788 | 1.657041  | 43 | 1  | 0 | 2.775856  | -1.975684 | -1.874932 |
| 45 | 8  | 0 | 1.201460  | -1.248100 | 1.870173  | 44 | 6  | 0 | 3.472167  | 0.379548  | -0.761246 |
| 46 | 8  | 0 | 3.032063  | -0.858324 | 0.611270  | 45 | 8  | 0 | 2.914983  | 1.482897  | -0.802610 |
| 47 | 1  | 0 | 4.329328  | 0.748061  | 1.460637  | 46 | 8  | 0 | 3.711479  | -0.340670 | 0.254016  |
| 48 | 1  | 0 | 4.337635  | 1.609786  | 2.903498  | 47 | 1  | 0 | 4.199014  | -1.935067 | -0.980255 |
| 49 | 17 | 0 | 1.581946  | 2.577240  | 1.006224  | 48 | 1  | 0 | 4.300787  | -2.276765 | -2.638234 |
| 50 | 1  | 0 | 1.331225  | 1.158549  | 3.471054  | 49 | 17 | 0 | 0.913445  | -2.046528 | -1.582181 |
| 51 | 1  | 0 | 2.437650  | 0.723489  | -4.280375 | 50 | 1  | 0 | 2.139153  | -0.062510 | -3.254105 |
|    |    |   |           |           |           | 51 | 1  | 0 | 1.921035  | -1.732921 | 4.096929  |

HF=-1808.2863439\ZeroPoint=0.3773757\Thermal=0.4063323

HF=-1808.2936292\ZeroPoint=0.3806969\Thermal=0.4104586

G = 13.6 kcal mol<sup>-1</sup>

G = -7.0 kcal mol<sup>-1</sup>

| Center Number | Atomic Number | Atomic Type | Coordinates (Angstroms) |          |           |
|---------------|---------------|-------------|-------------------------|----------|-----------|
|               |               |             | X                       | Y        | Z         |
| 1             | 46            | 0           | -0.241469               | 0.179769 | 0.644857  |
| 2             | 7             | 0           | -1.982702               | 0.667456 | -0.370224 |
| 3             | 7             | 0           | -2.247042               | 1.886116 | -0.560707 |
| 4             | 6             | 0           | -1.255581               | 2.772724 | -0.127351 |
| 5             | 6             | 0           | 0.101271                | 2.393372 | 0.020283  |
| 6             | 6             | 0           | 1.018110                | 3.297811 | 0.555387  |
| 7             | 1             | 0           | 2.055608                | 2.995332 | 0.609586  |
| 8             | 6             | 0           | 0.593449                | 4.571183 | 0.933678  |
| 9             | 6             | 0           | -0.736269               | 4.956250 | 0.749449  |

| Center Number | Atomic Number | Atomic Type | Coordinates (Angstroms) |          |           |
|---------------|---------------|-------------|-------------------------|----------|-----------|
|               |               |             | X                       | Y        | Z         |
| 1             | 46            | 0           | 0.153343                | 0.396066 | -0.804588 |
| 2             | 7             | 0           | 2.126093                | 0.396967 | -0.094039 |
| 3             | 7             | 0           | 2.615549                | 1.527426 | 0.208470  |
| 4             | 6             | 0           | 1.723547                | 2.576860 | 0.088210  |
| 5             | 6             | 0           | 0.396078                | 2.307197 | -0.335960 |
| 6             | 6             | 0           | -0.503145               | 3.366903 | -0.363956 |
| 7             | 1             | 0           | -1.546776               | 3.201672 | -0.600339 |
| 8             | 6             | 0           | -0.083391               | 4.656325 | -0.012763 |

|    |    |   |           |           |           |    |    |   |           |           |           |
|----|----|---|-----------|-----------|-----------|----|----|---|-----------|-----------|-----------|
| 9  | 6  | 0 | 1.235418  | 4.912364  | 0.375486  | 8  | 6  | 0 | -1.919966 | 4.174376  | -0.359639 |
| 10 | 1  | 0 | 1.538556  | 5.917919  | 0.641470  | 9  | 6  | 0 | -0.739376 | 4.909950  | -0.239126 |
| 11 | 6  | 0 | 2.148053  | 3.868147  | 0.436982  | 10 | 1  | 0 | -0.766454 | 5.992012  | -0.296562 |
| 12 | 1  | 0 | 3.173323  | 4.023529  | 0.751754  | 11 | 6  | 0 | 0.478040  | 4.259830  | -0.046139 |
| 13 | 6  | 0 | 3.004535  | -0.720132 | 0.034387  | 12 | 1  | 0 | 1.408690  | 4.809003  | 0.029696  |
| 14 | 6  | 0 | 4.395221  | -0.541965 | 0.117262  | 13 | 6  | 0 | 2.987246  | 0.341755  | -0.042494 |
| 15 | 6  | 0 | 5.217712  | -1.647993 | 0.272341  | 14 | 6  | 0 | 4.180649  | 1.052623  | -0.250207 |
| 16 | 1  | 0 | 6.291587  | -1.511252 | 0.328181  | 15 | 6  | 0 | 5.392014  | 0.384501  | -0.164168 |
| 17 | 6  | 0 | 4.670438  | -2.932702 | 0.348416  | 16 | 1  | 0 | 6.315546  | 0.924463  | -0.337272 |
| 18 | 1  | 0 | 5.319754  | -3.792623 | 0.466620  | 17 | 6  | 0 | 5.424070  | -0.981656 | 0.136054  |
| 19 | 6  | 0 | 3.291778  | -3.103559 | 0.256209  | 18 | 1  | 0 | 6.374908  | -1.498164 | 0.200216  |
| 20 | 1  | 0 | 2.859212  | -4.096176 | 0.299393  | 19 | 6  | 0 | 4.236187  | -1.679546 | 0.339217  |
| 21 | 6  | 0 | 2.452452  | -2.003921 | 0.091506  | 20 | 1  | 0 | 4.255382  | -2.738565 | 0.566285  |
| 22 | 1  | 0 | 1.386966  | -2.147889 | -0.024165 | 21 | 6  | 0 | 3.011061  | -1.027131 | 0.240023  |
| 23 | 6  | 0 | -1.345140 | -1.913794 | -1.760858 | 22 | 1  | 0 | 2.089678  | -1.569536 | 0.379186  |
| 24 | 6  | 0 | -2.123177 | -0.711699 | -2.341421 | 23 | 6  | 0 | -0.374722 | -2.518036 | -1.535131 |
| 25 | 1  | 0 | -1.681741 | -0.530543 | -3.327800 | 24 | 6  | 0 | -1.695063 | -1.927540 | -2.063534 |
| 26 | 7  | 0 | -1.803540 | 0.499082  | -1.512460 | 25 | 1  | 0 | -1.517828 | -1.780486 | -3.134973 |
| 27 | 1  | 0 | -2.426553 | 0.571036  | -0.692800 | 26 | 7  | 0 | -1.877056 | -0.564166 | -1.465632 |
| 28 | 6  | 0 | -3.620862 | -0.946396 | -2.466681 | 27 | 1  | 0 | -2.568939 | -0.556905 | -0.678108 |
| 29 | 1  | 0 | -0.803331 | 5.467362  | -0.030329 | 28 | 6  | 0 | -2.909785 | -2.816529 | -1.847439 |
| 30 | 1  | 0 | -1.967387 | 1.346114  | -2.049931 | 29 | 1  | 0 | -2.864070 | 4.687525  | -0.502771 |
| 31 | 1  | 0 | 4.808519  | 0.455137  | 0.055444  | 30 | 1  | 0 | -2.284592 | 0.070132  | -2.148306 |
| 32 | 1  | 0 | -0.453788 | 0.182550  | 1.467121  | 31 | 1  | 0 | 4.139522  | 2.107403  | -0.485056 |
| 33 | 6  | 0 | -2.308939 | -1.589537 | 3.681636  | 32 | 1  | 0 | -0.852466 | 1.161276  | 0.792073  |
| 34 | 1  | 0 | -1.911543 | -1.134114 | 4.592778  | 33 | 6  | 0 | -0.856239 | -1.177981 | 4.026562  |
| 35 | 1  | 0 | -2.475733 | -2.650134 | 3.877001  | 34 | 1  | 0 | -0.697369 | -0.351554 | 4.724288  |
| 36 | 6  | 0 | -1.329672 | -1.424424 | 2.520400  | 35 | 1  | 0 | -0.229939 | -2.015930 | 4.341427  |
| 37 | 1  | 0 | -0.361628 | -1.874793 | 2.745640  | 36 | 6  | 0 | -0.496164 | -0.736211 | 2.597350  |
| 38 | 7  | 0 | -1.125213 | 0.032037  | 2.238422  | 37 | 1  | 0 | 0.558617  | -0.449618 | 2.560981  |
| 39 | 1  | 0 | -0.778820 | 0.525041  | 3.060633  | 38 | 7  | 0 | -1.313261 | 0.393358  | 2.119373  |
| 40 | 6  | 0 | -1.901311 | -2.045767 | 1.242313  | 39 | 1  | 0 | -1.432575 | 1.087185  | 2.852448  |
| 41 | 8  | 0 | -1.367510 | -3.222269 | 0.948575  | 40 | 6  | 0 | -0.697104 | -1.919558 | 1.655625  |
| 42 | 8  | 0 | -2.749465 | -1.471617 | 0.604705  | 41 | 8  | 0 | 0.388616  | -2.707501 | 1.568862  |
| 43 | 1  | 0 | -2.040972 | 0.595311  | 1.888756  | 42 | 8  | 0 | -1.727543 | -2.135581 | 1.071834  |
| 44 | 1  | 0 | -1.606899 | -3.450054 | 0.007934  | 43 | 1  | 0 | -2.261731 | 0.109102  | 1.808107  |
| 45 | 1  | 0 | -3.262728 | -1.119454 | 3.433979  | 44 | 1  | 0 | 0.217676  | -3.382282 | 0.881072  |
| 46 | 8  | 0 | -0.182042 | -1.630616 | -1.281993 | 45 | 1  | 0 | -1.904882 | -1.479784 | 4.073504  |
| 47 | 8  | 0 | -1.829898 | -3.046902 | -1.757403 | 46 | 8  | 0 | 0.587050  | -1.636779 | -1.381754 |
| 48 | 1  | 0 | -4.108585 | -0.094729 | -2.949086 | 47 | 8  | 0 | -0.222609 | -3.705306 | -1.306728 |
| 49 | 1  | 0 | -3.797035 | -1.842487 | -3.063122 | 48 | 1  | 0 | -3.794705 | -2.380429 | -2.316726 |
| 50 | 1  | 0 | -4.060310 | -1.101115 | -1.481202 | 49 | 1  | 0 | -2.716160 | -3.798034 | -2.283155 |
| 51 | 17 | 0 | -3.219079 | 1.763993  | 1.206955  | 50 | 1  | 0 | -3.103180 | -2.938355 | -0.782607 |
|    |    |   |           |           |           | 51 | 17 | 0 | -4.085708 | 0.290568  | 0.520405  |

HF=-1808.3287159\ZeroPoint=0.3816565\Thermal=0.4109377

HF=-1808.2813309\ZeroPoint=0.3780841\Thermal=0.4071046

G = 22.0 kcal mol<sup>-1</sup>

G = 16.0 kcal mol<sup>-1</sup>

| Center Number | Atomic Number | Atomic Type | Coordinates (Angstroms) |          |           |
|---------------|---------------|-------------|-------------------------|----------|-----------|
|               |               |             | X                       | Y        | Z         |
| 1             | 46            | 0           | -0.080988               | 0.180997 | -0.777922 |
| 2             | 7             | 0           | 1.727549                | 1.000100 | -0.107663 |
| 3             | 7             | 0           | 1.739691                | 2.243513 | 0.125442  |
| 4             | 6             | 0           | 0.499274                | 2.865484 | 0.011474  |
| 5             | 6             | 0           | -0.697860               | 2.097255 | -0.073865 |
| 6             | 6             | 0           | -1.904593               | 2.779786 | -0.274110 |
| 7             | 1             | 0           | -2.831222               | 2.209522 | -0.287317 |

| Center Number | Atomic Number | Atomic Type | Coordinates (Angstroms) |           |           |
|---------------|---------------|-------------|-------------------------|-----------|-----------|
|               |               |             | X                       | Y         | Z         |
| 1             | 46            | 0           | -0.502801               | -0.316980 | -0.415833 |
| 2             | 7             | 0           | -1.356677               | 1.475306  | 0.160162  |
| 3             | 7             | 0           | -2.597957               | 1.504966  | 0.379091  |
| 4             | 6             | 0           | -3.229321               | 0.256948  | 0.333619  |
| 5             | 6             | 0           | -2.520834               | -0.959274 | 0.487781  |
| 6             | 6             | 0           | -3.191484               | -2.173621 | 0.352485  |

|    |    |   |           |           |           |    |    |   |           |           |           |
|----|----|---|-----------|-----------|-----------|----|----|---|-----------|-----------|-----------|
| 7  | 1  | 0 | -2.632445 | -3.083378 | 0.540782  | 6  | 6  | 0 | 1.739303  | -2.017942 | -1.933088 |
| 8  | 6  | 0 | -4.556849 | -2.183440 | 0.068288  | 7  | 1  | 0 | 2.811606  | -2.166856 | -1.960245 |
| 9  | 6  | 0 | -5.258996 | -0.981376 | -0.052432 | 8  | 6  | 0 | 0.906293  | -3.002321 | -2.476348 |
| 10 | 1  | 0 | -6.323719 | -0.995945 | -0.254073 | 9  | 6  | 0 | -0.484308 | -2.874664 | -2.433672 |
| 11 | 6  | 0 | -4.604813 | 0.239464  | 0.090582  | 10 | 1  | 0 | -1.117691 | -3.652242 | -2.841256 |
| 12 | 1  | 0 | -5.133136 | 1.179344  | -0.011005 | 11 | 6  | 0 | -1.059222 | -1.767520 | -1.829331 |
| 13 | 6  | 0 | -0.664882 | 2.715213  | 0.147962  | 12 | 1  | 0 | -2.133266 | -1.676700 | -1.745489 |
| 14 | 6  | 0 | -1.334058 | 3.911448  | -0.153428 | 13 | 6  | 0 | -0.460338 | 2.481185  | 0.022052  |
| 15 | 6  | 0 | -0.617152 | 5.097659  | -0.168965 | 14 | 6  | 0 | 0.331893  | 3.601160  | 0.304606  |
| 16 | 1  | 0 | -1.119857 | 6.025448  | -0.415506 | 15 | 6  | 0 | -0.302311 | 4.779388  | 0.686498  |
| 17 | 6  | 0 | 0.752338  | 5.096937  | 0.119836  | 16 | 1  | 0 | 0.293720  | 5.656492  | 0.907143  |
| 18 | 1  | 0 | 1.306663  | 6.028367  | 0.099832  | 17 | 6  | 0 | -1.692113 | 4.832847  | 0.785619  |
| 19 | 6  | 0 | 1.405606  | 3.903934  | 0.421919  | 18 | 1  | 0 | -2.177312 | 5.758611  | 1.075971  |
| 20 | 1  | 0 | 2.465864  | 3.897462  | 0.643599  | 19 | 6  | 0 | -2.474236 | 3.699524  | 0.518989  |
| 21 | 6  | 0 | 0.704914  | 2.703148  | 0.428788  | 20 | 1  | 0 | -3.552629 | 3.776203  | 0.616362  |
| 22 | 1  | 0 | 1.193030  | 1.775013  | 0.690941  | 21 | 6  | 0 | -1.874647 | 2.508688  | 0.134380  |
| 23 | 6  | 0 | 1.682916  | -0.343989 | -2.237032 | 22 | 6  | 0 | 6.359914  | 0.723619  | -0.059234 |
| 24 | 6  | 0 | 1.110656  | -1.765189 | -2.362662 | 23 | 1  | 0 | 6.710415  | -0.311274 | -0.042835 |
| 25 | 1  | 0 | 0.357995  | -1.708306 | -3.157546 | 24 | 1  | 0 | 6.937769  | 1.315146  | 0.651176  |
| 26 | 7  | 0 | 0.372407  | -2.050423 | -1.097645 | 25 | 6  | 0 | 4.884919  | 0.799501  | 0.308661  |
| 27 | 1  | 0 | 1.003238  | -2.314761 | -0.330101 | 26 | 1  | 0 | 4.727037  | 0.331204  | 1.285403  |
| 28 | 6  | 0 | 2.154451  | -2.818919 | -2.696410 | 27 | 7  | 0 | 4.033738  | 0.017313  | -0.643004 |
| 29 | 1  | 0 | -5.080978 | -3.127064 | -0.027073 | 28 | 1  | 0 | 4.068633  | -0.980755 | -0.379621 |
| 30 | 1  | 0 | -0.289282 | -2.817066 | -1.186801 | 29 | 6  | 0 | 4.356732  | 2.249895  | 0.445741  |
| 31 | 1  | 0 | -2.390614 | 3.890976  | -0.384353 | 30 | 8  | 0 | 5.097232  | 3.128797  | 0.849459  |
| 32 | 1  | 0 | -1.551087 | -1.048936 | 1.062993  | 31 | 8  | 0 | 3.095920  | 2.403950  | 0.154241  |
| 33 | 6  | 0 | 3.523506  | -1.440260 | 2.915835  | 32 | 1  | 0 | 1.350778  | -3.880856 | -2.932195 |
| 34 | 1  | 0 | 3.362661  | -1.304637 | 3.988318  | 33 | 1  | 0 | 4.400264  | 0.106609  | -1.589087 |
| 35 | 1  | 0 | 4.594928  | -1.579240 | 2.740194  | 34 | 1  | 0 | 1.413022  | 3.536119  | 0.238838  |
| 36 | 6  | 0 | 2.984399  | -0.223785 | 2.158631  | 35 | 1  | 0 | -2.367237 | -2.044711 | 1.011205  |
| 37 | 1  | 0 | 3.506481  | 0.686234  | 2.464685  | 36 | 6  | 0 | 1.149643  | -1.610565 | 2.326100  |
| 38 | 7  | 0 | 1.536185  | 0.004391  | 2.320420  | 37 | 1  | 0 | 2.054685  | -1.652427 | 2.933734  |
| 39 | 1  | 0 | 1.351886  | 0.391753  | 3.240373  | 38 | 1  | 0 | 0.416966  | -0.965336 | 2.809109  |
| 40 | 6  | 0 | 3.184374  | -0.383963 | 0.656579  | 39 | 6  | 0 | 0.552355  | -3.004911 | 2.157123  |
| 41 | 8  | 0 | 3.592348  | 0.739503  | 0.050355  | 40 | 1  | 0 | 0.284634  | -3.416395 | 3.134274  |
| 42 | 8  | 0 | 2.939800  | -1.409098 | 0.056115  | 41 | 7  | 0 | 1.523677  | -3.951288 | 1.506480  |
| 43 | 1  | 0 | 1.037876  | -0.891149 | 2.269906  | 42 | 1  | 0 | 2.441986  | -3.470439 | 1.138636  |
| 44 | 1  | 0 | 3.556444  | 0.612270  | -0.919989 | 43 | 6  | 0 | -0.726387 | -3.049465 | 1.302767  |
| 45 | 1  | 0 | 2.992074  | -2.338750 | 2.596401  | 44 | 8  | 0 | -1.577645 | -2.109388 | 1.637115  |
| 46 | 8  | 0 | 0.945953  | 0.491379  | -1.539435 | 45 | 8  | 0 | -0.876627 | -3.891562 | 0.442742  |
| 47 | 8  | 0 | 2.729577  | 0.001846  | -2.754024 | 46 | 1  | 0 | 1.031917  | -4.394094 | 0.716602  |
| 48 | 1  | 0 | 1.685115  | -3.794071 | -2.851958 | 47 | 1  | 0 | 1.836259  | -4.682578 | 2.141409  |
| 49 | 1  | 0 | 2.677019  | -2.527458 | -3.609132 | 48 | 17 | 0 | 4.124873  | -2.882630 | 0.650517  |
| 50 | 1  | 0 | 2.885079  | -2.890762 | -1.891264 | 49 | 46 | 0 | -2.666818 | 0.716312  | -0.097361 |
| 51 | 17 | 0 | -0.165539 | -2.854034 | 1.877797  | 50 | 6  | 0 | -6.038244 | 0.125755  | -1.187391 |
|    |    |   |           |           |           | 51 | 1  | 0 | -6.630580 | 1.039397  | -1.298461 |
|    |    |   |           |           |           | 52 | 1  | 0 | -6.675373 | -0.724984 | -1.432236 |
|    |    |   |           |           |           | 53 | 6  | 0 | -5.518834 | -0.023169 | 0.242031  |
|    |    |   |           |           |           | 54 | 1  | 0 | -6.356234 | -0.048338 | 0.942459  |
|    |    |   |           |           |           | 55 | 7  | 0 | -4.614169 | 1.127125  | 0.580132  |
|    |    |   |           |           |           | 56 | 6  | 0 | -4.744790 | -1.354977 | 0.385698  |
|    |    |   |           |           |           | 57 | 1  | 0 | -4.562077 | 1.251353  | 1.589280  |
|    |    |   |           |           |           | 58 | 1  | 0 | -4.981324 | 1.994742  | 0.195875  |
|    |    |   |           |           |           | 59 | 8  | 0 | -5.335150 | -2.362299 | 0.716099  |
|    |    |   |           |           |           | 60 | 8  | 0 | -3.471256 | -1.274591 | 0.089792  |
|    |    |   |           |           |           | 61 | 1  | 0 | 1.413488  | -1.181477 | 1.358909  |
|    |    |   |           |           |           | 62 | 1  | 0 | -5.209458 | 0.156254  | -1.899426 |
|    |    |   |           |           |           | 63 | 1  | 0 | 6.533006  | 1.145833  | -1.054722 |

HF=-1808.2902738\ZeroPoint=0.3806926\Thermal=0.4108547

G = -12.4 kcal mol<sup>-1</sup>

| Center Number | Atomic Number | Atomic Type | Coordinates (Angstroms) |           |           |
|---------------|---------------|-------------|-------------------------|-----------|-----------|
|               |               |             | X                       | Y         | Z         |
| 1             | 46            | 0           | 2.100408                | 0.727757  | -0.601849 |
| 2             | 7             | 0           | 0.111784                | 1.290972  | -0.436085 |
| 3             | 7             | 0           | -0.745041               | 0.369326  | -0.712700 |
| 4             | 6             | 0           | -0.214631               | -0.783451 | -1.293406 |
| 5             | 6             | 0           | 1.198894                | -0.874966 | -1.348681 |

-----  
HF=-2258.9835395\ZeroPoint=0.4639239\Thermal=0.5018701

G = 17.8 kcal mol<sup>-1</sup>

| Center<br>Number | Atomic<br>Number | Atomic<br>Type | Coordinates (Angstroms) |           |           |
|------------------|------------------|----------------|-------------------------|-----------|-----------|
|                  |                  |                | X                       | Y         | Z         |
| 1                | 46               | 0              | 1.402239                | 0.230225  | -0.694642 |
| 2                | 7                | 0              | -0.531075               | 0.636095  | -0.067170 |
| 3                | 7                | 0              | -1.383335               | -0.323581 | -0.141118 |
| 4                | 6                | 0              | -0.859706               | -1.563399 | -0.549744 |
| 5                | 6                | 0              | 0.514991                | -1.834023 | -0.329596 |
| 6                | 6                | 0              | 1.060708                | -3.024340 | -0.812505 |
| 7                | 1                | 0              | 2.099356                | -3.228541 | -0.583042 |
| 8                | 6                | 0              | 0.252554                | -3.932308 | -1.494919 |
| 9                | 6                | 0              | -1.108560               | -3.669863 | -1.667092 |
| 10               | 1                | 0              | -1.739669               | -4.390890 | -2.173196 |
| 11               | 6                | 0              | -1.680391               | -2.492116 | -1.191508 |
| 12               | 1                | 0              | -2.739802               | -2.301264 | -1.300129 |
| 13               | 6                | 0              | -1.034416               | 1.831826  | 0.433813  |
| 14               | 6                | 0              | -0.202865               | 2.952205  | 0.591149  |
| 15               | 6                | 0              | -0.745333               | 4.106500  | 1.135607  |
| 16               | 1                | 0              | -0.123671               | 4.983844  | 1.262819  |
| 17               | 6                | 0              | -2.089476               | 4.135127  | 1.514956  |
| 18               | 1                | 0              | -2.505563               | 5.040108  | 1.944731  |
| 19               | 6                | 0              | -2.910590               | 3.013295  | 1.347055  |
| 20               | 1                | 0              | -3.947245               | 3.080170  | 1.661310  |
| 21               | 6                | 0              | -2.406370               | 1.839807  | 0.798466  |
| 22               | 6                | 0              | 4.695986                | 0.662167  | -3.241029 |
| 23               | 1                | 0              | 5.532206                | 0.010338  | -2.979891 |
| 24               | 1                | 0              | 5.083371                | 1.565517  | -3.713709 |
| 25               | 6                | 0              | 3.926643                | 1.050126  | -1.987683 |
| 26               | 1                | 0              | 4.622591                | 1.475069  | -1.259333 |
| 27               | 7                | 0              | 3.321185                | -0.145563 | -1.311730 |
| 28               | 1                | 0              | 3.915468                | -0.421352 | -0.515839 |
| 29               | 6                | 0              | 2.871884                | 2.128669  | -2.233907 |
| 30               | 8                | 0              | 3.076747                | 3.080715  | -2.950275 |
| 31               | 8                | 0              | 1.740228                | 1.997154  | -1.552509 |
| 32               | 1                | 0              | 0.674525                | -4.859833 | -1.864233 |
| 33               | 1                | 0              | 3.306912                | -0.943484 | -1.943256 |
| 34               | 1                | 0              | 0.829239                | 2.915727  | 0.272874  |
| 35               | 1                | 0              | 1.062467                | -1.346781 | 0.536090  |
| 36               | 6                | 0              | 4.278817                | 0.049793  | 3.619669  |
| 37               | 1                | 0              | 4.995213                | 0.090590  | 4.445839  |
| 38               | 1                | 0              | 3.297587                | 0.348109  | 3.986957  |
| 39               | 6                | 0              | 4.168048                | -1.355851 | 3.046472  |
| 40               | 1                | 0              | 3.911873                | -2.074839 | 3.830993  |
| 41               | 7                | 0              | 5.469364                | -1.798118 | 2.437271  |
| 42               | 1                | 0              | 5.817949                | -1.032586 | 1.743790  |
| 43               | 6                | 0              | 3.096089                | -1.506046 | 1.928202  |
| 44               | 8                | 0              | 2.011488                | -0.918611 | 2.117923  |
| 45               | 8                | 0              | 3.431625                | -2.219647 | 0.946757  |
| 46               | 1                | 0              | 5.256769                | -2.600989 | 1.833668  |
| 47               | 1                | 0              | 6.191570                | -2.011909 | 3.121387  |
| 48               | 17               | 0              | 6.117140                | 0.230262  | 0.403007  |
| 49               | 46               | 0              | -3.314485               | 0.122611  | 0.412494  |
| 50               | 6                | 0              | -6.630115               | 0.466341  | -1.051540 |

|    |   |   |           |           |           |
|----|---|---|-----------|-----------|-----------|
| 51 | 1 | 0 | -7.126829 | 1.423867  | -0.864295 |
| 52 | 1 | 0 | -7.317384 | -0.175995 | -1.602567 |
| 53 | 6 | 0 | -6.240332 | -0.223917 | 0.253806  |
| 54 | 1 | 0 | -7.127352 | -0.376894 | 0.872713  |
| 55 | 7 | 0 | -5.251954 | 0.627528  | 1.003522  |
| 56 | 6 | 0 | -5.621667 | -1.613237 | -0.054205 |
| 57 | 1 | 0 | -5.305507 | 0.432445  | 2.001385  |
| 58 | 1 | 0 | -5.463785 | 1.614890  | 0.881406  |
| 59 | 8 | 0 | -6.374334 | -2.527703 | -0.334144 |
| 60 | 8 | 0 | -4.323919 | -1.663448 | -0.034764 |
| 61 | 1 | 0 | 4.593606  | 0.752255  | 2.845632  |
| 62 | 1 | 0 | -5.747599 | 0.643920  | -1.672689 |
| 63 | 1 | 0 | 4.046309  | 0.156862  | -3.963896 |

-----  
HF=-2258.9323835\ZeroPoint=0.4622209\Thermal=0.4998677

G = 15.4 kcal mol<sup>-1</sup>

| Center<br>Number | Atomic<br>Number | Atomic<br>Type | Coordinates (Angstroms) |           |           |
|------------------|------------------|----------------|-------------------------|-----------|-----------|
|                  |                  |                | X                       | Y         | Z         |
| 1                | 46               | 0              | 1.420550                | 0.240180  | -0.617012 |
| 2                | 7                | 0              | -0.530362               | 0.657914  | -0.056528 |
| 3                | 7                | 0              | -1.369080               | -0.316982 | -0.074205 |
| 4                | 6                | 0              | -0.829626               | -1.568111 | -0.420299 |
| 5                | 6                | 0              | 0.555512                | -1.806253 | -0.226226 |
| 6                | 6                | 0              | 1.109918                | -3.008493 | -0.668495 |
| 7                | 1                | 0              | 2.159408                | -3.186792 | -0.461079 |
| 8                | 6                | 0              | 0.301047                | -3.961671 | -1.284662 |
| 9                | 6                | 0              | -1.068777               | -3.731782 | -1.430318 |
| 10               | 1                | 0              | -1.700415               | -4.486583 | -1.883716 |
| 11               | 6                | 0              | -1.648123               | -2.542477 | -0.995534 |
| 12               | 1                | 0              | -2.713142               | -2.374179 | -1.086701 |
| 13               | 6                | 0              | -1.050841               | 1.876261  | 0.366299  |
| 14               | 6                | 0              | -0.234379               | 3.016701  | 0.442690  |
| 15               | 6                | 0              | -0.792441               | 4.196879  | 0.911239  |
| 16               | 1                | 0              | -0.183051               | 5.089508  | 0.976089  |
| 17               | 6                | 0              | -2.135501               | 4.231356  | 1.293799  |
| 18               | 1                | 0              | -2.563279               | 5.156963  | 1.664065  |
| 19               | 6                | 0              | -2.941490               | 3.089487  | 1.203655  |
| 20               | 1                | 0              | -3.978328               | 3.163314  | 1.515821  |
| 21               | 6                | 0              | -2.422213               | 1.889231  | 0.732661  |
| 22               | 6                | 0              | 3.422702                | -0.204882 | -3.599251 |
| 23               | 1                | 0              | 4.051649                | -1.099435 | -3.602071 |
| 24               | 1                | 0              | 3.644391                | 0.378782  | -4.493451 |
| 25               | 6                | 0              | 3.698181                | 0.641533  | -2.358175 |
| 26               | 1                | 0              | 4.750964                | 0.929433  | -2.313277 |
| 27               | 7                | 0              | 3.364762                | -0.093917 | -1.107958 |
| 28               | 1                | 0              | 3.956521                | 0.303673  | -0.348239 |
| 29               | 6                | 0              | 2.864311                | 1.932565  | -2.390298 |
| 30               | 8                | 0              | 3.111683                | 2.840553  | -3.146752 |
| 31               | 8                | 0              | 1.831615                | 1.962877  | -1.554276 |
| 32               | 1                | 0              | 0.731161                | -4.897831 | -1.621290 |
| 33               | 1                | 0              | 3.594577                | -1.088083 | -1.126750 |
| 34               | 1                | 0              | 0.797317                | 2.976598  | 0.120935  |
| 35               | 1                | 0              | 1.142510                | -1.312034 | 0.617101  |
| 36               | 6                | 0              | 4.412022                | -0.263647 | 3.712382  |
| 37               | 1                | 0              | 5.195309                | -0.203236 | 4.474385  |



|    |    |   |           |           |           |    |    |   |           |           |           |
|----|----|---|-----------|-----------|-----------|----|----|---|-----------|-----------|-----------|
| 38 | 1  | 0 | 3.444422  | -0.344236 | 4.206031  | 25 | 6  | 0 | 4.947653  | -0.720093 | -0.356944 |
| 39 | 6  | 0 | 4.599331  | -1.480326 | 2.820487  | 26 | 1  | 0 | 4.793218  | -0.255230 | -1.335873 |
| 40 | 1  | 0 | 4.636113  | -2.398440 | 3.415612  | 27 | 7  | 0 | 4.063935  | 0.044087  | 0.581172  |
| 41 | 7  | 0 | 5.890762  | -1.401032 | 2.051226  | 28 | 1  | 0 | 4.066417  | 1.039010  | 0.296595  |
| 42 | 1  | 0 | 5.934623  | -0.443095 | 1.540917  | 29 | 6  | 0 | 4.457079  | -2.181315 | -0.498395 |
| 43 | 6  | 0 | 3.486064  | -1.687237 | 1.749259  | 30 | 8  | 0 | 5.219016  | -3.044832 | -0.891409 |
| 44 | 8  | 0 | 2.345788  | -1.287489 | 2.047470  | 31 | 8  | 0 | 3.194322  | -2.365141 | -0.222331 |
| 45 | 8  | 0 | 3.868629  | -2.257552 | 0.689525  | 32 | 1  | 0 | 1.263267  | 3.824223  | 2.940544  |
| 46 | 1  | 0 | 5.825312  | -2.106173 | 1.306398  | 33 | 1  | 0 | 4.430626  | -0.017364 | 1.529522  |
| 47 | 1  | 0 | 6.719718  | -1.530611 | 2.627163  | 34 | 1  | 0 | 1.564711  | -3.559562 | -0.299372 |
| 48 | 17 | 0 | 5.676254  | 1.159841  | 0.571469  | 35 | 1  | 0 | 0.904081  | 1.620575  | -0.892004 |
| 49 | 46 | 0 | -3.307336 | 0.138916  | 0.456809  | 36 | 6  | 0 | 0.778286  | 4.750930  | -2.146951 |
| 50 | 6  | 0 | -6.629956 | 0.356066  | -1.014082 | 37 | 1  | 0 | 0.312501  | 5.679964  | -1.819043 |
| 51 | 1  | 0 | -7.135216 | 1.318575  | -0.883966 | 38 | 1  | 0 | 0.361200  | 4.485263  | -3.123264 |
| 52 | 1  | 0 | -7.312763 | -0.325282 | -1.522115 | 39 | 6  | 0 | 0.495769  | 3.662897  | -1.114904 |
| 53 | 6  | 0 | -6.229387 | -0.249252 | 0.329559  | 40 | 1  | 0 | 0.946577  | 3.935972  | -0.159262 |
| 54 | 1  | 0 | -7.113098 | -0.373768 | 0.959493  | 41 | 7  | 0 | 1.166214  | 2.386266  | -1.517568 |
| 55 | 7  | 0 | -5.248439 | 0.656605  | 1.023000  | 42 | 1  | 0 | 2.247265  | 2.513288  | -1.406417 |
| 56 | 6  | 0 | -5.596397 | -1.648006 | 0.104716  | 43 | 6  | 0 | -0.999735 | 3.477959  | -0.852150 |
| 57 | 1  | 0 | -5.297169 | 0.521704  | 2.031004  | 44 | 8  | 0 | -1.655986 | 4.352381  | -0.350264 |
| 58 | 1  | 0 | -5.471383 | 1.632421  | 0.842083  | 45 | 8  | 0 | -1.436151 | 2.273071  | -1.218226 |
| 59 | 8  | 0 | -6.339610 | -2.585628 | -0.117921 | 46 | 1  | 0 | 0.921605  | 2.114202  | -2.468725 |
| 60 | 8  | 0 | -4.298160 | -1.683091 | 0.124754  | 47 | 17 | 0 | 3.993619  | 2.849722  | -0.879110 |
| 61 | 1  | 0 | 4.423906  | 0.651099  | 3.117733  | 48 | 46 | 0 | -2.607701 | -0.876786 | 0.053467  |
| 62 | 1  | 0 | -5.751148 | 0.503474  | -1.648241 | 49 | 6  | 0 | -6.028169 | -0.435694 | 1.083362  |
| 63 | 1  | 0 | 2.374160  | -0.514621 | -3.637134 | 50 | 1  | 0 | -6.593720 | -1.370077 | 1.154601  |

HF=-2258.935991\ZeroPoint=0.4626361\Thermal=0.5007715

G = -13.9 kcal mol<sup>-1</sup>

| Center Number | Atomic Number | Atomic Type | Coordinates (Angstroms) |           |           |
|---------------|---------------|-------------|-------------------------|-----------|-----------|
|               |               |             | X                       | Y         | Z         |
| 1             | 46            | 0           | 2.156796                | -0.733546 | 0.551333  |
| 2             | 7             | 0           | 0.185378                | -1.369600 | 0.402123  |
| 3             | 7             | 0           | -0.702656               | -0.483552 | 0.700246  |
| 4             | 6             | 0           | -0.206493               | 0.676856  | 1.301513  |
| 5             | 6             | 0           | 1.202834                | 0.820314  | 1.341843  |
| 6             | 6             | 0           | 1.708452                | 1.977456  | 1.933654  |
| 7             | 1             | 0           | 2.775520                | 2.163637  | 1.948428  |
| 8             | 6             | 0           | 0.847339                | 2.931313  | 2.486525  |
| 9             | 6             | 0           | -0.539845               | 2.758582  | 2.444945  |
| 10            | 1             | 0           | -1.197328               | 3.515388  | 2.853251  |
| 11            | 6             | 0           | -1.080399               | 1.630909  | 1.844543  |
| 12            | 1             | 0           | -2.151563               | 1.504018  | 1.765416  |
| 13            | 6             | 0           | -0.344564               | -2.569682 | -0.076788 |
| 14            | 6             | 0           | 0.486703                | -3.659303 | -0.370884 |
| 15            | 6             | 0           | -0.106139               | -4.851637 | -0.771956 |
| 16            | 1             | 0           | 0.518982                | -5.705913 | -1.001088 |
| 17            | 6             | 0           | -1.493406               | -4.948133 | -0.880082 |
| 18            | 1             | 0           | -1.946369               | -5.885303 | -1.185451 |
| 19            | 6             | 0           | -2.314130               | -3.845146 | -0.603334 |
| 20            | 1             | 0           | -3.388560               | -3.956964 | -0.708648 |
| 21            | 6             | 0           | -1.757386               | -2.640443 | -0.197790 |
| 22            | 6             | 0           | 6.414362                | -0.607559 | 0.032956  |
| 23            | 1             | 0           | 6.740337                | 0.435195  | 0.016211  |
| 24            | 1             | 0           | 7.016249                | -1.187263 | -0.667182 |

|    |   |   |           |           |           |
|----|---|---|-----------|-----------|-----------|
| 51 | 1 | 0 | -6.698577 | 0.388096  | 1.331132  |
| 52 | 6 | 0 | -5.474794 | -0.232385 | -0.326307 |
| 53 | 1 | 0 | -6.292737 | -0.218028 | -1.049558 |
| 54 | 7 | 0 | -4.522713 | -1.343162 | -0.667523 |
| 55 | 6 | 0 | -4.744151 | 1.128683  | -0.414231 |
| 56 | 1 | 0 | -4.447463 | -1.446494 | -1.677575 |
| 57 | 1 | 0 | -4.865224 | -2.230550 | -0.306241 |
| 58 | 8 | 0 | -5.366731 | 2.124739  | -0.714017 |
| 59 | 8 | 0 | -3.471121 | 1.081559  | -0.105808 |
| 60 | 1 | 0 | -2.343912 | 2.061669  | -0.844258 |
| 61 | 1 | 0 | -5.218962 | -0.458207 | 1.818008  |
| 62 | 1 | 0 | 6.583440  | -1.022035 | 1.032380  |
| 63 | 1 | 0 | 1.855037  | 4.902930  | -2.242510 |

HF=-2258.9860376\ZeroPoint=0.4643378\Thermal=0.5023368

G = 14.8 kcal mol<sup>-1</sup>

| Center Number | Atomic Number | Atomic Type | Coordinates (Angstroms) |           |           |
|---------------|---------------|-------------|-------------------------|-----------|-----------|
|               |               |             | X                       | Y         | Z         |
| 1             | 46            | 0           | 2.174986                | 0.529143  | -0.485259 |
| 2             | 7             | 0           | 0.203581                | 1.203236  | -0.266185 |
| 3             | 7             | 0           | -0.713487               | 0.372870  | -0.620687 |
| 4             | 6             | 0           | -0.265182               | -0.817249 | -1.208212 |
| 5             | 6             | 0           | 1.047187                | -1.258239 | -0.891657 |
| 6             | 6             | 0           | 1.531422                | -2.418865 | -1.510350 |
| 7             | 1             | 0           | 2.500691                | -2.801700 | -1.208114 |
| 8             | 6             | 0           | 0.726826                | -3.113528 | -2.410969 |
| 9             | 6             | 0           | -0.573312               | -2.679614 | -2.677062 |
| 10            | 1             | 0           | -1.206824               | -3.252492 | -3.343020 |
| 11            | 6             | 0           | -1.087197               | -1.533400 | -2.073666 |

|    |    |   |           |           |           | Number | Number | Type | X         | Y         | Z         |
|----|----|---|-----------|-----------|-----------|--------|--------|------|-----------|-----------|-----------|
| 12 | 1  | 0 | -2.103679 | -1.213994 | -2.255529 |        |        |      |           |           |           |
| 13 | 6  | 0 | -0.282293 | 2.388902  | 0.282884  |        |        |      |           |           |           |
| 14 | 6  | 0 | 0.592300  | 3.426311  | 0.642824  | 1      | 46     | 0    | 2.193000  | 0.507239  | -0.489993 |
| 15 | 6  | 0 | 0.050443  | 4.597925  | 1.153916  | 2      | 7      | 0    | 0.223221  | 1.186604  | -0.254506 |
| 16 | 1  | 0 | 0.706352  | 5.413876  | 1.430879  | 3      | 7      | 0    | -0.699009 | 0.363387  | -0.609223 |
| 17 | 6  | 0 | -1.332037 | 4.724731  | 1.304951  | 4      | 6      | 0    | -0.260779 | -0.829839 | -1.200353 |
| 18 | 1  | 0 | -1.746259 | 5.645642  | 1.701349  | 5      | 6      | 0    | 1.037057  | -1.300696 | -0.872978 |
| 19 | 6  | 0 | -2.195316 | 3.680118  | 0.948196  | 6      | 6      | 0    | 1.514652  | -2.460206 | -1.494793 |
| 20 | 1  | 0 | -3.263061 | 3.818857  | 1.083779  | 7      | 1      | 0    | 2.472209  | -2.859801 | -1.177777 |
| 21 | 6  | 0 | -1.692918 | 2.495931  | 0.424856  | 8      | 6      | 0    | 0.713360  | -3.128742 | -2.417889 |
| 22 | 6  | 0 | 6.439271  | 0.563531  | -0.559230 | 9      | 6      | 0    | -0.574672 | -2.669089 | -2.697545 |
| 23 | 1  | 0 | 6.804301  | -0.441383 | -0.337580 | 10     | 1      | 0    | -1.207317 | -3.222185 | -3.380893 |
| 24 | 1  | 0 | 7.098828  | 1.299885  | -0.098068 | 11     | 6      | 0    | -1.079321 | -1.521623 | -2.087989 |
| 25 | 6  | 0 | 5.028731  | 0.748610  | -0.018765 | 12     | 1      | 0    | -2.086964 | -1.182491 | -2.282498 |
| 26 | 1  | 0 | 5.016710  | 0.535034  | 1.055443  | 13     | 6      | 0    | -0.253256 | 2.371014  | 0.304955  |
| 27 | 7  | 0 | 4.064394  | -0.212209 | -0.624391 | 14     | 6      | 0    | 0.629293  | 3.399337  | 0.671578  |
| 28 | 1  | 0 | 4.106536  | -1.140272 | -0.111254 | 15     | 6      | 0    | 0.097318  | 4.568729  | 1.197475  |
| 29 | 6  | 0 | 4.498205  | 2.183371  | -0.176963 | 16     | 1      | 0    | 0.759394  | 5.377694  | 1.480139  |
| 30 | 8  | 0 | 5.217672  | 3.152022  | -0.075840 | 17     | 6      | 0    | -1.283758 | 4.702101  | 1.356201  |
| 31 | 8  | 0 | 3.195653  | 2.274646  | -0.383686 | 18     | 1      | 0    | -1.690489 | 5.620947  | 1.764952  |
| 32 | 1  | 0 | 1.093781  | -4.024630 | -2.867790 | 19     | 6      | 0    | -2.154960 | 3.667038  | 0.991474  |
| 33 | 1  | 0 | 4.289846  | -0.369575 | -1.605607 | 20     | 1      | 0    | -3.221144 | 3.811077  | 1.133535  |
| 34 | 1  | 0 | 1.660235  | 3.313912  | 0.500029  | 21     | 6      | 0    | -1.662548 | 2.485197  | 0.453164  |
| 35 | 1  | 0 | 1.299674  | -1.177135 | 0.271159  | 22     | 6      | 0    | 6.454695  | 0.532312  | -0.587144 |
| 36 | 6  | 0 | 0.382968  | -3.847786 | 3.129672  | 23     | 1      | 0    | 6.818673  | -0.470684 | -0.355437 |
| 37 | 1  | 0 | 0.003243  | -4.861214 | 2.980034  | 24     | 1      | 0    | 7.117301  | 1.272272  | -0.136122 |
| 38 | 1  | 0 | -0.306343 | -3.309721 | 3.787013  | 25     | 6      | 0    | 5.046431  | 0.726096  | -0.043997 |
| 39 | 6  | 0 | 0.531767  | -3.121043 | 1.783173  | 26     | 1      | 0    | 5.037055  | 0.525766  | 1.032857  |
| 40 | 1  | 0 | 1.236756  | -3.675037 | 1.161561  | 27     | 7      | 0    | 4.077449  | -0.238324 | -0.634606 |
| 41 | 7  | 0 | 1.068897  | -1.757926 | 1.903414  | 28     | 1      | 0    | 4.107456  | -1.160510 | -0.104759 |
| 42 | 1  | 0 | 2.049645  | -1.811960 | 2.184707  | 29     | 6      | 0    | 4.517488  | 2.158699  | -0.218856 |
| 43 | 6  | 0 | -0.798775 | -3.133226 | 1.038618  | 30     | 8      | 0    | 5.234954  | 3.129768  | -0.136150 |
| 44 | 8  | 0 | -1.136807 | -4.016213 | 0.289396  | 31     | 8      | 0    | 3.212350  | 2.248859  | -0.420183 |
| 45 | 8  | 0 | -1.565191 | -2.063926 | 1.326061  | 32     | 1      | 0    | 1.071499  | -4.040498 | -2.880150 |
| 46 | 1  | 0 | 0.530402  | -1.193911 | 2.553980  | 33     | 1      | 0    | 4.298555  | -0.410669 | -1.614310 |
| 47 | 17 | 0 | 4.016425  | -2.714617 | 1.039519  | 34     | 1      | 0    | 1.695542  | 3.282479  | 0.522050  |
| 48 | 46 | 0 | -2.619883 | 0.812956  | -0.039841 | 35     | 1      | 0    | 1.325415  | -1.171021 | 0.244595  |
| 49 | 6  | 0 | -5.987370 | 0.799167  | -1.333075 | 36     | 6      | 0    | 0.265138  | -3.838337 | 3.188706  |
| 50 | 1  | 0 | -6.519390 | 1.750515  | -1.232835 | 37     | 1      | 0    | -0.100828 | -4.853191 | 3.014614  |
| 51 | 1  | 0 | -6.667034 | 0.072731  | -1.779596 | 38     | 1      | 0    | -0.454831 | -3.311204 | 3.821771  |
| 52 | 6  | 0 | -5.518706 | 0.280635  | 0.025288  | 39     | 6      | 0    | 0.466841  | -3.094797 | 1.857501  |
| 53 | 1  | 0 | -6.375329 | 0.154553  | 0.690753  | 40     | 1      | 0    | 1.198262  | -3.639720 | 1.258694  |
| 54 | 7  | 0 | -4.549951 | 1.255243  | 0.637703  | 41     | 7      | 0    | 0.986931  | -1.728899 | 2.006748  |
| 55 | 6  | 0 | -4.844308 | -1.104739 | -0.145836 | 42     | 1      | 0    | 1.957989  | -1.776403 | 2.314187  |
| 56 | 1  | 0 | -4.538178 | 1.150189  | 1.650448  | 43     | 6      | 0    | -0.832428 | -3.110706 | 1.060127  |
| 57 | 1  | 0 | -4.835064 | 2.212485  | 0.443901  | 44     | 8      | 0    | -1.128864 | -3.980289 | 0.277361  |
| 58 | 8  | 0 | -5.541860 | -2.095906 | -0.187905 | 45     | 8      | 0    | -1.628496 | -2.060206 | 1.339423  |
| 59 | 8  | 0 | -3.543067 | -1.073028 | -0.277701 | 46     | 1      | 0    | 0.430443  | -1.184437 | 2.658362  |
| 60 | 1  | 0 | -2.371803 | -2.058405 | 0.758293  | 47     | 17     | 0    | 3.958965  | -2.701192 | 1.063960  |
| 61 | 1  | 0 | -5.138501 | 0.941467  | -2.007564 | 48     | 46     | 0    | -2.605034 | 0.817925  | -0.037251 |
| 62 | 1  | 0 | 6.465648  | 0.726262  | -1.641467 | 49     | 6      | 0    | -5.958130 | 0.892735  | -1.369513 |
| 63 | 1  | 0 | 1.359372  | -3.910538 | 3.614723  | 50     | 1      | 0    | -6.478291 | 1.848361  | -1.249616 |
|    |    |   |           |           |           | 51     | 1      | 0    | -6.642371 | 0.187864  | -1.842766 |
|    |    |   |           |           |           | 52     | 6      | 0    | -5.512117 | 0.331460  | -0.020580 |
|    |    |   |           |           |           | 53     | 1      | 0    | -6.377855 | 0.201337  | 0.632238  |
|    |    |   |           |           |           | 54     | 7      | 0    | -4.535581 | 1.274644  | 0.627712  |
|    |    |   |           |           |           | 55     | 6      | 0    | -4.857100 | -1.059392 | -0.220961 |
|    |    |   |           |           |           | 56     | 1      | 0    | -4.536973 | 1.142944  | 1.637439  |

HF=-2258.9388037\ZeroPoint=0.4612798\Thermal=0.4987619

G = 14.1 kcal mol<sup>-1</sup>

| Center | Atomic | Atomic | Coordinates (Angstroms) |
|--------|--------|--------|-------------------------|
|--------|--------|--------|-------------------------|

|    |   |   |           |           |           |                                                     |   |   |          |           |           |
|----|---|---|-----------|-----------|-----------|-----------------------------------------------------|---|---|----------|-----------|-----------|
| 57 | 1 | 0 | -4.803654 | 2.240916  | 0.455791  | 62                                                  | 1 | 0 | 6.477942 | 0.682921  | -1.671147 |
| 58 | 8 | 0 | -5.570743 | -2.036354 | -0.306691 | 63                                                  | 1 | 0 | 1.220136 | -3.899324 | 3.715107  |
| 59 | 8 | 0 | -3.553453 | -1.046848 | -0.326448 | -----                                               |   |   |          |           |           |
| 60 | 1 | 0 | -2.412498 | -2.060043 | 0.742729  | HF=-2258.9388497\ZeroPoint=0.4618464\Thermal=0.5002 |   |   |          |           |           |
| 61 | 1 | 0 | -5.099791 | 1.041259  | -2.030573 |                                                     |   |   |          |           |           |
